# Supplementary material for: Sex modulates the human genome regulatory network during heart failure and aging.
Source: Research Square preprint supplement (doi:10.21203/rs.3.rs-2202852/v1), 2022-11-11
Supplement: Supplementary file 1 [file 49483cc7c110f53abccd689b.xlsx]

## Sheet: A
		T-test	Female/Male	Male/Female
Distance to TSS	Mean	p-value = 0.01206
Female	-143
Male	1560
DNase.seq	Mean	p-value < 2.2e-16
Female	0.392
Male	0.157		2.5
CTCF	Mean	p-value < 2.2e-16
Female	0.237
Male	0.0953		2.49
H3K4me3	Mean	p-value < 2.2e-16
Female	0.768
Male	0.357		2.15
H3K9me3	Mean	p-value = 0.01215
Female	0.002
Male	0.00567		0.35	2.83333
H3K4me1	Mean	p-value < 2.2e-16
Female	0.0974
Male	0.183		0.53	1.8768
H3K27me3	Mean	p-value = 0.004018
Female	0.027
Male	0.0427		0.63	1.58201
H3K36me3	Mean	p-value < 2.2e-16
Female	0.00357
Male	0.137		0.03	38.32
H3K27ac	Mean	p-value < 2.2e-16
Female	0.87
Male	0.51		1.71	0.586365
H3K9ac	Mean	p-value < 2.2e-16
Female	0.812
Male	0.427		1.9	0.525862
POLR2A	Mean	p-value < 2.2e-16
Female	0.401
Male	0.164		2.45	0.408978
ATAC.seq	Mean	p-value < 2.2e-16
Female	0.572
Male	0.211		2.71	0.368881
RAMPAGE	Mean	p-value < 2.2e-16
Female	0.366
Male	0.096		3.81	0.262295

## Sheet: B
KEGG, promoter DPI	Female	Male	p-value
hsa03320~PPAR_signaling_pathway	1	13	0.009
hsa04931~Insulin_resistance	11	4	0.049
hsa00071~Fatty_acid_degradation	2	11	0.0587

## Sheet: C
Type	DPI	GENE	corr_healthy_fem	corr_healthy_male	pval(f-m, healthy)
promoter	rDPI_305	RERE	0.777076	-0.465367	8.19e-10
promoter	rDPI_17278	ELL3	0.439409	-0.766953	3.39e-09
promoter	rDPI_797	LUZP1	0.706192	-0.52626	5.47e-09
promoter	rDPI_9681	PPP6R3	0.706192	-0.51851	7.05e-09
promoter	rDPI_11897	CALCOCO1	0.700029	-0.504486	1.47e-08
promoter	rDPI_47212	TBX20	0.664367	-0.523123	3.79e-08
promoter	rDPI_49348	GATA4	0.569929	-0.624611	3.9e-08
promoter	rDPI_22505	MSI2	0.691443	-0.475885	5.06e-08
promoter	rDPI_19867	PLLP	0.388538	-0.736616	7.1e-08
promoter	rDPI_26391	HNRNPUL1	0.414514	-0.712813	1.08e-07
promoter	rDPI_37164	HTD2	0.483856	-0.658194	1.54e-07
promoter	rDPI_11907	CBX5	0.508291	-0.629408	2.21e-07
promoter	rDPI_23384	NARF	0.455899	-0.661884	2.89e-07
promoter	rDPI_7733	STK32C	0.599867	-0.526998	3.52e-07
promoter	rDPI_27155	ZNF880	0.83321	-0.0787913	3.63e-07
promoter	rDPI_42477	PJA2	0.552979	-0.570545	4.16e-07
promoter	rDPI_48831	CYREN	0.547475	-0.573867	4.42e-07
promoter	rDPI_5904	ARHGAP12	0.708174	-0.366463	4.44e-07
promoter	rDPI_42912	LOC105379194	0.580557	-0.53721	4.86e-07
promoter	rDPI_2872	POLR3GL	0.655561	-0.442855	5.14e-07
promoter	rDPI_46305	GINM1	0.668109	-0.417576	6.16e-07
promoter	rDPI_35370	SUN2	0.411432	-0.667051	7.46e-07
promoter	rDPI_1749	ECHDC2	0.579395	-0.519617	8.32e-07
promoter	rDPI_49729	EXTL3	0.291899	-0.729789	9.88e-07
promoter	rDPI_21525	TEFM	0.598767	-0.48751	1.09e-06
promoter	rDPI_34394	MORC3	0.658863	-0.402814	1.24e-06
promoter	rDPI_7566	GRK5	0.747137	-0.238404	1.46e-06
promoter	rDPI_27828	FAM228B	0.592603	-0.463706	2.43e-06
promoter	rDPI_42359	ERAP1	0.764308	-0.161458	3.21e-06
promoter	rDPI_26130	ZFP30	0.502568	-0.545635	3.5e-06
promoter	rDPI_29797	MARCHF7	0.788523	-0.0791604	4.94e-06
promoter	rDPI_18053	FAM219B	0.525902	-0.505224	5.55e-06
promoter	rDPI_10248	CRYAB	0.468667	-0.557998	5.81e-06
promoter	rDPI_22691	CCDC47	0.798429	-0.0411486	6.13e-06
promoter	rDPI_4618	CD34	0.313252	-0.669819	6.24e-06
promoter	rDPI_9268	TRMT112	0.610874	-0.397647	6.65e-06
promoter	rDPI_25777	ZNF254	0.640592	-0.353546	6.96e-06
promoter	rDPI_8154	TMEM9B	0.381714	-0.620367	7.1e-06
promoter	rDPI_42819	MTND5P11	-0.511433	0.500558	9.03e-06
promoter	rDPI_26124	ZNF793-AS1	0.389639	-0.606343	9.07e-06
promoter	rDPI_38451	B3GALNT1	0.615057	-0.377719	9.08e-06
promoter	rDPI_51675	SLC25A51	0.582257	-0.420528	9.11e-06
promoter	rDPI_26238	PAF1	0.568828	-0.432707	1e-05
promoter	rDPI_18302	ZNF592	0.674493	-0.281213	1.02e-05
promoter	rDPI_26976	RPS11	0.683739	-0.263868	1.05e-05
promoter	rDPI_27604	TRAPPC12	0.519958	-0.480683	1.18e-05
promoter	rDPI_21271	MED9	0.308849	-0.653212	1.18e-05
promoter	rDPI_21800	ERBB2	0.705972	-0.217184	1.19e-05
promoter	rDPI_37104	SELENOK	0.543733	-0.453927	1.2e-05
promoter	rDPI_1529	HYI	0.664147	-0.289701	1.22e-05
promoter	rDPI_26712	CCDC8	0.657102	-0.300404	1.24e-05
promoter	rDPI_18830	ATP6V0C	0.608012	-0.372921	1.24e-05
promoter	rDPI_1936	LEPROT	0.394041	-0.590474	1.3e-05
promoter	rDPI_33590	SNX21	0.469988	-0.521462	1.46e-05
promoter	rDPI_9344	MRPL49	0.656442	-0.291915	1.49e-05
promoter	rDPI_31756	CFLAR	0.537129	-0.451897	1.49e-05
promoter	rDPI_37272	ARL6IP5	0.487599	-0.503748	1.49e-05
promoter	rDPI_17581	SLTM	0.666348	-0.274939	1.52e-05
promoter	rDPI_4925	PSEN2	0.39272	-0.585123	1.55e-05
promoter	rDPI_1857	NFIA	0.720501	-0.172345	1.62e-05
promoter	rDPI_36787	WDR6	0.495303	-0.492677	1.62e-05
promoter	rDPI_27661	ITGB1BP1	0.706192	-0.198547	1.68e-05
promoter	rDPI_39542	CORIN	0.389639	-0.583831	1.71e-05
promoter	rDPI_18412	SEMA4B	0.679813	-0.243017	1.8e-05
promoter	rDPI_2937	NBPF14	0.485124	-0.497377	1.84e-05
promoter	rDPI_42669	ISOC1	0.411652	-0.559105	2.07e-05
promoter	rDPI_1587	UROD	0.458981	-0.517218	2.09e-05
promoter	rDPI_7617	TACC2	0.660184	-0.267189	2.15e-05
promoter	rDPI_10531	TLCD5	0.67009	-0.248922	2.22e-05
promoter	rDPI_29989	PPIG	0.488039	-0.485665	2.27e-05
promoter	rDPI_15860	SNAPC1	0.164441	-0.714473	2.34e-05
promoter	rDPI_7349	ADD3	0.739653	-0.109422	2.45e-05
promoter	rDPI_36226	TGFBR2	0.70289	-0.1836	2.49e-05
promoter	rDPI_24218	SOCS6	0.644775	-0.279183	2.74e-05
promoter	rDPI_40638	CLGN	0.242148	-0.664652	2.99e-05
promoter	rDPI_8144	DENND2B	0.390079	-0.560581	3.13e-05
promoter	rDPI_13692	ZMYM2	0.577414	-0.368493	3.15e-05
promoter	rDPI_45175	SLC29A1	0.589741	-0.35207	3.16e-05
promoter	rDPI_43125	RBM27	0.53823	-0.413332	3.37e-05
promoter	rDPI_3385	SCAMP3	0.630466	-0.289701	3.42e-05
promoter	rDPI_26949	TRPM4	0.39162	-0.555414	3.45e-05
promoter	rDPI_24764	TICAM1	0.419137	-0.531611	3.51e-05
promoter	rDPI_16661	C14orf180	0.324038	-0.605605	3.56e-05
promoter	rDPI_3367	DPM3	0.594144	-0.339522	3.59e-05
promoter	rDPI_2997	RNU2-17P	-0.668696	0.225201	3.6e-05
promoter	rDPI_10449	DDX6	0.57169	-0.367385	3.73e-05
promoter	rDPI_54415	TRMT2B	0.416495	-0.531057	3.76e-05
promoter	rDPI_17612	VPS13C	0.691003	-0.176589	4.22e-05
promoter	rDPI_51874	KIF27	0.532726	-0.40632	4.46e-05
promoter	rDPI_7446	CASP7	0.648077	-0.246338	4.58e-05
promoter	rDPI_20978	TMEM256	0.258012	-0.640664	4.6e-05
promoter	rDPI_2562	STRIP1	0.377091	-0.554676	4.72e-05
promoter	rDPI_12665	NR2C1	0.608453	-0.299296	5.28e-05
promoter	rDPI_53806	PRRG1	0.553419	-0.369969	5.6e-05
promoter	rDPI_50368	CIBAR1	0.351335	-0.567777	5.65e-05
promoter	rDPI_29422	PAX8-AS1	0.232255	-0.649396	5.69e-05
promoter	rDPI_49010	CUL1	0.556721	-0.36351	5.86e-05
promoter	rDPI_23699	ABHD3	0.773334	0.0204821	5.96e-05
promoter	rDPI_28501	USP34	0.743395	-0.0487141	6.09e-05
promoter	rDPI_27771	RDH14	0.465145	-0.463706	6.18e-05
promoter	rDPI_40767	LRBA	0.242368	-0.639926	6.24e-05
promoter	rDPI_37326	PPP4R2	0.692764	-0.150571	6.28e-05
promoter	rDPI_29842	IFIH1	0.599647	-0.300773	6.49e-05
promoter	rDPI_55199	EIF1AY	0.416702	-0.507069	6.55e-05
promoter	rDPI_22302	CALCOCO2	0.566187	-0.343213	6.87e-05
promoter	rDPI_20373	HSDL1	0.665247	-0.193196	7.08e-05
promoter	rDPI_28487	PEX13	0.789844	0.0747318	7.28e-05
promoter	rDPI_6105	PARG	0.625843	-0.254457	7.45e-05
promoter	rDPI_53653	PIR	0.633988	-0.23988	7.71e-05
promoter	rDPI_38632	ATP11B	0.796888	0.0977972	7.81e-05
promoter	rDPI_15799	DAAM1	0.548356	-0.359082	7.82e-05
promoter	rDPI_13931	PDS5B	0.392941	-0.519617	7.92e-05
promoter	rDPI_8080	SMPD1	0.466686	-0.446915	8.52e-05
promoter	rDPI_12896	MTERF2	0.592163	-0.293945	8.92e-05
promoter	rDPI_27197	MYADM	0.486498	-0.423296	9.03e-05
promoter	rDPI_4529	NUCKS1	0.421558	-0.488063	9.04e-05
promoter	rDPI_1352	INPP5B	0.508291	-0.397647	9.31e-05
promoter	rDPI_45469	PHIP	0.600968	-0.278814	9.35e-05
promoter	rDPI_45740	AK9	0.406369	-0.500057	9.41e-05
promoter	rDPI_39011	ZNF595	0.285515	-0.596009	9.42e-05
promoter	rDPI_13177	MAPKAPK5-AS1	0.579395	-0.308338	9.47e-05
promoter	rDPI_47300	URGCP	0.649398	-0.202422	9.59e-05
promoter	rDPI_40973	NEK1	0.477913	-0.428832	9.71e-05
promoter	rDPI_4945	ZNF678	0.658643	-0.185999	9.73e-05
promoter	rDPI_32689	NRSN2-AS1	0.57125	-0.315165	0.000102163
promoter	rDPI_5697	CACNB2	0.458981	-0.44507	0.000104006
promoter	rDPI_52666	ZBTB43	0.324259	-0.563533	0.000104279
promoter	rDPI_9916	RSF1	0.656662	-0.184523	0.000105673
promoter	rDPI_40649	RNF150	0.745376	-0.0103333	0.00010703
promoter	rDPI_51392	C9orf72	0.512034	-0.384731	0.000110082
promoter	rDPI_33224	DYNLRB1	0.600087	-0.269588	0.000112587
promoter	rDPI_43486	MAT2B	0.176108	-0.658932	0.000114096
promoter	rDPI_17857	PIAS1	0.460742	-0.438611	0.000114325
promoter	rDPI_19915	CFAP20	0.373789	-0.519432	0.000115037
promoter	rDPI_42645	PHAX	0.553859	-0.331034	0.000115905
promoter	rDPI_19538	ZNF764	0.431904	-0.466474	0.000116151
promoter	rDPI_17605	ICE2	0.651819	-0.185999	0.000118335
promoter	rDPI_12743	CHPT1	0.352656	-0.534932	0.000120551
promoter	rDPI_19060	EMP2	0.692984	-0.107392	0.000128669
promoter	rDPI_50041	RPS20	0.656442	-0.172529	0.000130081
promoter	rDPI_3371	KRTCAP2	0.509612	-0.375135	0.00013924
promoter	rDPI_39839	G3BP2	0.42464	-0.464445	0.000139889
promoter	rDPI_43202	PPARGC1B	0.444672	-0.443962	0.000142406
promoter	rDPI_5177	NID1	0.121294	-0.682182	0.000142674
promoter	rDPI_14092	GPALPP1	0.605811	-0.247076	0.000143836
promoter	rDPI_14347	EDNRB	0.682198	-0.120309	0.000144916
promoter	rDPI_36190	RARB	0.525242	-0.353362	0.000147919
promoter	rDPI_45308	KLHL31	0.414734	-0.471087	0.000148035
promoter	rDPI_25344	MRI1	0.355298	-0.522569	0.000151446
promoter	rDPI_34705	ESS2	0.656222	-0.162565	0.000154367
promoter	rDPI_46834	ZDHHC4	0.416715	-0.466843	0.000155439
promoter	rDPI_28920	MRPL53	0.654461	-0.162565	0.000162176
promoter	rDPI_47751	POMZP3	0.489858	-0.386349	0.000172043
promoter	rDPI_51688	GLIDR	0.350675	-0.520355	0.000172965
promoter	rDPI_18175	HYKK	0.528984	-0.336755	0.000183949
promoter	rDPI_21796	PGAP3	0.696066	-0.0789759	0.000185093
promoter	rDPI_19955	CNOT1	0.62122	-0.207035	0.000190164
promoter	rDPI_49963	HGSNAT	0.706413	-0.0568331	0.000190707
promoter	rDPI_15879	SYNE2	0.356839	-0.509099	0.000197168
promoter	rDPI_54214	AR	0.369386	-0.498028	0.000198351
promoter	rDPI_3521	PRCC	0.566847	-0.282874	0.000200628
promoter	rDPI_49445	PCM1	0.530525	-0.329743	0.000201431
promoter	rDPI_24066	ME2	0.468447	-0.401338	0.000201729
promoter	rDPI_39617	SRD5A3	0.580275	-0.263499	0.000203576
promoter	rDPI_45268	CENPQ	-0.385896	0.479944	0.000212944
promoter	rDPI_52985	SETX	0.75066	0.0446546	0.000213282
promoter	rDPI_49832	BAG4	0.744936	0.031738	0.000213447
promoter	rDPI_11203	HEBP1	0.215292	-0.610956	0.000215373
promoter	rDPI_4493	DSTYK	0.372468	-0.490647	0.000218646
promoter	rDPI_41721	MOCS2	0.27781	-0.56667	0.000219627
promoter	rDPI_12944	ACACB	0.443131	-0.423296	0.000219939
promoter	rDPI_46971	CDCA7L	0.16356	-0.642694	0.000220039
promoter	rDPI_48848	CHRM2	0.624743	-0.192458	0.000220585
promoter	rDPI_10980	ZNF384	0.524141	-0.330296	0.000229176
promoter	rDPI_54813	SMIM10	0.618799	-0.199285	0.00022971
promoter	rDPI_30131	ATF2	0.579615	-0.255564	0.000236276
promoter	rDPI_54839	MMGT1	0.487599	-0.371076	0.000238738
promoter	rDPI_14408	IPO5	0.667229	-0.115142	0.000243203
promoter	rDPI_21808	MIEN1	0.666348	-0.116619	0.000243541
promoter	rDPI_9129	TTC9C	0.60493	-0.216446	0.000245392
promoter	rDPI_8333	RPS13	0.582257	-0.249475	0.000245728
promoter	rDPI_34545	CFAP410	0.538009	-0.308523	0.000247499
promoter	rDPI_5383	HNRNPU	0.748018	0.048345	0.000248286
promoter	rDPI_41084	IRF2	0.744496	0.0405951	0.000248997
promoter	rDPI_48388	PNPLA8	0.725564	0.000184523	0.000251965
promoter	rDPI_35253	MPST	0.479013	-0.377719	0.000252014
promoter	rDPI_42833	SMAD5	0.590622	-0.23582	0.000252543
promoter	rDPI_25224	WDR83OS	0.655121	-0.133041	0.000256144
promoter	rDPI_7465	CCDC186	0.622541	-0.186184	0.000258252
promoter	rDPI_39302	FAM200B	0.494643	-0.358344	0.000259665
promoter	rDPI_54731	SMARCA1	0.0455679	-0.701741	0.000263113
promoter	rDPI_27684	TAF1B	0.621881	-0.184523	0.000269694
promoter	rDPI_9555	CCS	0.598547	-0.219398	0.000273157
promoter	rDPI_48405	TMEM168	0.60449	-0.209249	0.000278803
promoter	rDPI_1608	NASP	0.285735	-0.549694	0.000281919
promoter	rDPI_26448	ZNF574	0.484737	-0.364802	0.000283172
promoter	rDPI_12015	RAB5B	0.420237	-0.432707	0.00028479
promoter	rDPI_13191	ERP29	0.707073	-0.0286011	0.000290498
promoter	rDPI_28998	RNF181	0.630466	-0.165148	0.000295237
promoter	rDPI_13675	ZNF10	0.52216	-0.317564	0.000298083
promoter	rDPI_34632	DIP2A	0.311711	-0.526813	0.000298436
promoter	rDPI_17385	SECISBP2L	0.287496	-0.54545	0.000300495
promoter	rDPI_53969	UXT	0.742295	0.0481605	0.000302085
promoter	rDPI_1326	LSM10	0.521719	-0.316826	0.000304687
promoter	rDPI_27373	ZNF581	0.551218	-0.276969	0.000315578
promoter	rDPI_49023	ZNF398	0.623202	-0.172345	0.000316645
promoter	rDPI_28913	WBP1	0.301585	-0.531795	0.000318579
promoter	rDPI_5862	SVIL-AS1	0.426621	-0.420159	0.000319866
promoter	rDPI_6688	BMPR1A	0.519738	-0.315534	0.000324713
promoter	rDPI_9844	KCNE3	0.687921	-0.0583093	0.000326141
promoter	rDPI_3427	ARHGEF2	0.688802	-0.0564641	0.000327029
promoter	rDPI_24247	ZNF407	0.641033	-0.14116	0.000327843
promoter	rDPI_4656	IRF6	0.208027	-0.598408	0.000329155
promoter	rDPI_20703	SPATA22	0.667869	-0.0937008	0.000333764
promoter	rDPI_24819	RFX2	0.52194	-0.311106	0.000334227
promoter	rDPI_53680	REPS2	0.606691	-0.194118	0.000336732
promoter	rDPI_40100	HERC3	0.450836	-0.390266	0.000349378
promoter	rDPI_8646	CRY2	0.578074	-0.233606	0.000350965
promoter	rDPI_19055	ATF7IP2	0.584018	-0.224934	0.000351931
promoter	rDPI_12128	BAZ2A	0.676474	-0.0730711	0.00036059
promoter	rDPI_11890	ATF7	0.62056	-0.167547	0.000364607
promoter	rDPI_17586	RNF111	0.581596	-0.225672	0.000367727
promoter	rDPI_4108	RNF2	0.460742	-0.375873	0.000373329
promoter	rDPI_33444	SNHG17	0.235984	-0.572391	0.000384286
promoter	rDPI_43599	NKX2-5	0.486718	-0.345058	0.000384373
promoter	rDPI_25739	ZNF714	0.503008	-0.325868	0.000384667
promoter	rDPI_30038	SLC25A12	0.640372	-0.131565	0.000386923
promoter	rDPI_12800	TDG	0.782359	0.159243	0.00038882
promoter	rDPI_32263	SPEG	0.394041	-0.441564	0.000389209
promoter	rDPI_41763	IL6ST	0.737452	0.0551724	0.000395765
promoter	rDPI_51642	GNE	0.182932	-0.607265	0.000396058
promoter	rDPI_32860	PCNA	0.466686	-0.365909	0.00039651
promoter	rDPI_13627	ADGRD1	0.368286	-0.464445	0.000397199
promoter	rDPI_46236	SF3B5	0.423319	-0.410933	0.00040287
promoter	rDPI_49716	ELP3	0.442251	-0.39082	0.000406957
promoter	rDPI_29821	TANK	0.63641	-0.13341	0.000416045
promoter	rDPI_3453	PMF1	0.459641	-0.370707	0.000417472
promoter	rDPI_21165	TMEM220	0.579175	-0.220321	0.000423073
promoter	rDPI_27432	ZNF460	0.619019	-0.160351	0.000423411
promoter	rDPI_45917	SERINC1	0.689022	-0.0387498	0.00042532
promoter	rDPI_45053	TAF8	0.566407	-0.237666	0.000427533
promoter	rDPI_52476	GSN	0.598987	-0.189874	0.000432329
promoter	rDPI_1239	ZNF362	0.655561	-0.0977972	0.000436709
promoter	rDPI_42935	SPATA24	0.589741	-0.202606	0.000439223
promoter	rDPI_39477	APBB2	0.649838	-0.107208	0.000439739
promoter	rDPI_17347	SHF	0.291679	-0.52423	0.000440297
promoter	rDPI_46693	ZFAND2A-DT	0.0862928	-0.6617	0.000441725
promoter	rDPI_23682	FAM210A	0.431244	-0.397278	0.000445063
promoter	rDPI_43719	PHYKPL	0.517757	-0.298743	0.000447924
promoter	rDPI_25472	AKAP8	0.614396	-0.163856	0.000448656
promoter	rDPI_37133	PDE12	-0.158497	-0.778134	0.000452178
promoter	rDPI_28862	CCT7	0.378192	-0.447837	0.000457884
promoter	rDPI_25687	SUGP1	0.792485	0.195963	0.000460582
promoter	rDPI_46531	PRKN	0.667008	-0.0739937	0.000461154
promoter	rDPI_27750	NBAS	0.680877	-0.047976	0.000466029
promoter	rDPI_39740	YTHDC1	0.691884	-0.0260178	0.000474284
promoter	rDPI_22348	KAT7	0.272527	-0.535486	0.000475611
promoter	rDPI_10420	TMEM25	0.497064	-0.319594	0.000481334
promoter	rDPI_51420	SMU1	0.47417	-0.345058	0.000490999
promoter	rDPI_21496	CORO6	0.659964	-0.0822973	0.000491188
promoter	rDPI_42654	LINC01184	0.566847	-0.227701	0.00049563
promoter	rDPI_51680	ALDH1B1	-0.458541	0.36185	0.000496768
promoter	rDPI_52426	ATP6V1G1	0.646096	-0.105178	0.000499277
promoter	rDPI_31617	HIBCH	0.539771	-0.263868	0.000499595
promoter	rDPI_23881	ZNF24	0.568388	-0.22438	0.000504753
promoter	rDPI_18294	SEC11A	0.602729	-0.174005	0.000506147
promoter	rDPI_50505	POLR2K	0.667229	-0.0667973	0.000510589
promoter	rDPI_32458	GIGYF2	0.0693425	-0.665206	0.00051884
promoter	rDPI_20883	RNASEK	0.600748	-0.174928	0.000522588
promoter	rDPI_42286	LYSMD3	0.315673	-0.495813	0.000526384
promoter	rDPI_37531	BBX	0.634649	-0.120494	0.000528964
promoter	rDPI_25635	FKBP8	0.468447	-0.345796	0.000540869
promoter	rDPI_18055	FAM219B	0.48302	-0.328451	0.000546762
promoter	rDPI_41341	SNHG18	0.670971	-0.0548033	0.000551968
promoter	rDPI_8082	APBB1	0.436968	-0.377719	0.00056426
promoter	rDPI_11857	PFDN5	0.632227	-0.119571	0.000569351
promoter	rDPI_26074	ZNF529	0.65314	-0.083958	0.000572311
promoter	rDPI_13674	ZNF140	0.545054	-0.247445	0.000579981
promoter	rDPI_54461	GPRASP2	0.437188	-0.375504	0.000583772
promoter	rDPI_1779	HSPB11	0.676474	-0.0405951	0.000586891
promoter	rDPI_44417	HLA-K	0.4331	-0.377903	0.000603369
promoter	rDPI_40427	METTL14	0.434106	-0.376427	0.000607653
promoter	rDPI_7359	MXI1	0.741854	0.0935532	0.000608296
promoter	rDPI_51932	SECISBP2	0.65248	-0.0808211	0.000609734
promoter	rDPI_28906	RTKN	0.27803	-0.518694	0.000614259
promoter	rDPI_3389	FDPS	0.643234	-0.0939222	0.000634623
promoter	rDPI_6556	LRMDA	0.459641	-0.345981	0.000635953
promoter	rDPI_29035	CHMP3	0.596565	-0.168285	0.000636217
promoter	rDPI_4811	MTARC2	0.720501	0.0512974	0.000639527
promoter	rDPI_44826	RPS10	0.524801	-0.267374	0.000642969
promoter	rDPI_27833	FAM228A	0.432544	-0.374479	0.000646104
promoter	rDPI_45605	MANEA	0.307528	-0.491754	0.000650454
promoter	rDPI_45257	CD2AP	0.65358	-0.0741783	0.000653749
promoter	rDPI_41665	TMEM267	0.619019	-0.13138	0.000656433
promoter	rDPI_21216	ZSWIM7	0.344291	-0.458909	0.000662947
promoter	rDPI_5657	ITGA8	0.754842	0.129166	0.000669317
promoter	rDPI_26797	DHX34	0.550557	-0.230469	0.000672826
promoter	rDPI_25188	ZNF20	0.433666	-0.370707	0.000674992
promoter	rDPI_23614	CHMP1B	0.71808	0.0500057	0.00067522
promoter	rDPI_3975	RALGPS2	0.357059	-0.445808	0.00068169
promoter	rDPI_20951	EIF5A	0.552538	-0.226779	0.000683156
promoter	rDPI_48135	AP4M1	0.594364	-0.166255	0.000689334
promoter	rDPI_19125	PARN	0.661725	-0.0555414	0.000696634
promoter	rDPI_15444	EGLN3	-0.646316	0.0822973	0.0006971
promoter	rDPI_8505	CSTF3	0.453478	-0.345612	0.000716677
promoter	rDPI_33121	REM1	0.368506	-0.432338	0.000717304
promoter	rDPI_6124	SGMS1	0.720721	0.0597855	0.000719109
promoter	rDPI_12682	LTA4H	0.515115	-0.272172	0.000723415
promoter	rDPI_51131	ZNF250	0.549897	-0.226594	0.000723896
promoter	rDPI_45247	CYP39A1	0.284634	-0.504855	0.000727168
promoter	rDPI_21107	KRBA2	0.167302	-0.590843	0.000734241
promoter	rDPI_9254	BAD	0.512034	-0.27457	0.0007403
promoter	rDPI_51884	RMI1	0.329762	-0.465367	0.000746543
promoter	rDPI_45149	MAD2L1BP	0.567067	-0.200577	0.000748477
promoter	rDPI_45523	TBX18	0.550337	-0.223457	0.000752444
promoter	rDPI_55160	RPS4Y1	0.269046	-0.515557	0.000753004
promoter	rDPI_50628	EBAG9	0.501027	-0.286933	0.00075527
promoter	rDPI_47560	RABGEF1	0.629145	-0.105178	0.000758864
promoter	rDPI_3614	PEX19	0.607792	-0.13913	0.000760152
promoter	rDPI_28195	ATL2	0.79953	0.247814	0.000773736
promoter	rDPI_1209	SYNC	0.646756	-0.0730711	0.000788603
promoter	rDPI_37228	MAGI1	0.469107	-0.321624	0.000794544
promoter	rDPI_28257	SLC8A1	0.0836512	-0.64011	0.000796538
promoter	rDPI_35314	PICK1	0.379512	-0.415546	0.00080139
promoter	rDPI_32620	MTERF4	0.52194	-0.256118	0.000811066
promoter	rDPI_38914	PCYT1A	0.215952	-0.552093	0.00081291
promoter	rDPI_25745	ZNF493	0.665908	-0.0369046	0.00081898
promoter	rDPI_12246	TSPAN31	0.442691	-0.349302	0.000819615
promoter	rDPI_18843	KCTD5	0.610874	-0.128982	0.000822007
promoter	rDPI_54247	DLG3	0.517097	-0.260547	0.000833357
promoter	rDPI_27792	PUM2	0.337247	-0.452635	0.000834212
promoter	rDPI_26663	SNRPD2	0.733049	0.096321	0.000838126
promoter	rDPI_43644	HIGD2A	0.721822	0.0734402	0.000847785
promoter	rDPI_23876	ZSCAN30	0.475931	-0.309261	0.000852989
promoter	rDPI_41047	AGA	0.482756	-0.300773	0.000859103
promoter	rDPI_27952	SLC30A3	0.164428	-0.584938	0.000872347
promoter	rDPI_44787	SYNGAP1	0.540507	-0.2268	0.000874676
promoter	rDPI_55002	IDH3G	0.465145	-0.320147	0.000874874
promoter	rDPI_26702	HIF3A	0.425741	-0.36351	0.000875629
promoter	rDPI_45628	PNISR	0.661725	-0.0394879	0.000878421
promoter	rDPI_19840	MT1X	-0.53867	0.22844	0.000885512
promoter	rDPI_24783	SAFB	0.62122	-0.106839	0.000892928
promoter	rDPI_26323	C19orf47	0.429923	-0.357237	0.00090216
promoter	rDPI_20181	DDX19A	0.787422	0.227148	0.000903275
promoter	rDPI_54242	IGBP1	0.667449	-0.0271249	0.000905482
promoter	rDPI_40286	NPNT	0.732168	0.099827	0.000905931
promoter	rDPI_43740	ZNF879	0.724904	0.0848806	0.000911203
promoter	rDPI_43636	KIAA1191	0.52282	-0.247261	0.000912653
promoter	rDPI_23265	BAHCC1	0.648737	-0.0588629	0.000921273
promoter	rDPI_52086	PRXL2C	0.58798	-0.155184	0.000934814
promoter	rDPI_28807	MCEE	0.451276	-0.330112	0.000958568
promoter	rDPI_25643	UBA52	0.630466	-0.0867258	0.000960229
promoter	rDPI_22628	APPBP2	0.525902	-0.239695	0.00096322
promoter	rDPI_33501	OSER1	-0.558922	0.195041	0.000964287
promoter	rDPI_7370	SMC3	0.16334	-0.580879	0.000967473
promoter	rDPI_48270	POLR2J2	0.51716	-0.250443	0.000971109
promoter	rDPI_4820	DUSP10	0.517317	-0.250213	0.000971526
promoter	rDPI_2967	H2BC21	0.594584	-0.141898	0.000981492
promoter	rDPI_39081	MAEA	0.481435	-0.293207	0.000990825
promoter	rDPI_6408	ANAPC16	0.435206	-0.345243	0.0009991
promoter	rDPI_8487	IMMP1L	0.34275	-0.43732	0.00100218
promoter	rDPI_20367	MBTPS1	0.532066	-0.22807	0.00101562
promoter	rDPI_9700	IGHMBP2	0.337026	-0.441748	0.0010162
promoter	rDPI_9009	SDHAF2	0.203845	-0.549694	0.0010227
promoter	rDPI_27991	LINC01460	0.442251	-0.335647	0.00102965
promoter	rDPI_34762	DGCR6L	-0.00220135	-0.678307	0.00103599
promoter	rDPI_25426	TECR	0.617698	-0.101857	0.00104015
promoter	rDPI_25137	PRKCSH	0.539991	-0.215154	0.00105157
promoter	rDPI_9888	UVRAG	0.370927	-0.40798	0.00105198
promoter	rDPI_39863	SCARB2	0.772453	0.201499	0.00106087
promoter	rDPI_16277	ZC3H14	0.466025	-0.306862	0.0010613
promoter	rDPI_27027	FUZ	0.0493102	-0.648414	0.00106356
promoter	rDPI_18345	DET1	0.242368	-0.518694	0.00106456
promoter	rDPI_23128	MFSD11	0.467126	-0.305386	0.00106462
promoter	rDPI_22338	SPOP	0.546154	-0.205928	0.00106518
promoter	rDPI_35533	SNU13	0.701349	0.0485296	0.00107143
promoter	rDPI_36709	MAP4	0.543953	-0.208511	0.00107169
promoter	rDPI_9691	CPT1A	0.188435	-0.558182	0.00107871
promoter	rDPI_32624	PPP1R7	0.668109	-0.0131011	0.00108604
promoter	rDPI_42231	RPS23	0.677355	0.00442855	0.00109586
promoter	rDPI_32792	DDRGK1	0.804373	0.283243	0.00109752
promoter	rDPI_45806	NT5DC1	0.323818	-0.449129	0.00109997
promoter	rDPI_52646	GAPVD1	0.657322	-0.0313689	0.00110077
promoter	rDPI_44673	AGPAT1	0.601849	-0.122523	0.00110513
promoter	rDPI_12629	MRPL42	0.512694	-0.247445	0.00110692
promoter	rDPI_47181	RP9P	0.639932	-0.0608926	0.00110755
promoter	rDPI_12448	THAP2	0.0563545	-0.64214	0.00112014
promoter	rDPI_32910	TMX4	0.142427	-0.588075	0.00112173
promoter	rDPI_54053	PRICKLE3	0.580495	-0.153523	0.00112432
promoter	rDPI_32438	PTMA	0.585779	-0.144851	0.00113803
promoter	rDPI_3028	RPRD2	0.582917	-0.148541	0.00114722
promoter	rDPI_29014	ST3GAL5	0.58776	-0.140238	0.00116525
promoter	rDPI_46402	ARID1B	0.688582	0.0300773	0.00116912
promoter	rDPI_54641	PGRMC1	0.757044	0.172529	0.00117218
promoter	rDPI_25767	ZNF91	0.654681	-0.0313689	0.00117471
promoter	rDPI_40338	PLA2G12A	0.47351	-0.291362	0.00117779
promoter	rDPI_29550	SAP130	0.574112	-0.159243	0.0011843
promoter	rDPI_10298	NCAM1	0.622321	-0.0850651	0.00118744
promoter	rDPI_37993	PIK3R4	0.63663	-0.0608926	0.00119745
promoter	rDPI_15689	CNIH1	0.550337	-0.192088	0.00119887
promoter	rDPI_18729	NME3	0.626283	-0.0771306	0.00121246
promoter	rDPI_46076	EYA4	0.608959	-0.103925	0.0012294
promoter	rDPI_25540	BABAM1	0.318535	-0.447284	0.00123371
promoter	rDPI_3425	KHDC4	0.665908	-0.00793449	0.00123417
promoter	rDPI_54935	IDS	0.625183	-0.0773152	0.00124021
promoter	rDPI_34768	MED15	0.454138	-0.309814	0.00125231
promoter	rDPI_37878	MCM2	0.682198	0.0238035	0.00126695
promoter	rDPI_38431	IFT80	0.65314	-0.0286011	0.00126768
promoter	rDPI_27174	ZNF888	0.550557	-0.187106	0.00128269
promoter	rDPI_34954	TTC28-AS1	0.567508	-0.162196	0.0013013
promoter	rDPI_36968	RRP9	-0.363663	0.402076	0.00130594
promoter	rDPI_16329	RPS6KA5	0.367845	-0.397832	0.00131
promoter	rDPI_47080	JAZF1	0.602289	-0.109791	0.00131059
promoter	rDPI_35383	APOBEC3C	0.48914	-0.26516	0.00131766
promoter	rDPI_45093	RRP36	0.779497	0.233237	0.0013195
promoter	rDPI_53998	WDR13	-0.0477693	-0.693253	0.00132118
promoter	rDPI_11438	CAPRIN2	0.463164	-0.29579	0.00132402
promoter	rDPI_29849	FIGN	0.283974	-0.473117	0.00132683
promoter	rDPI_8389	PTPN5	-0.321617	0.440272	0.00132794
promoter	rDPI_54686	MCTS1	0.307088	-0.453004	0.00133194
promoter	rDPI_21153	GAS7	0.0468887	-0.63845	0.00139461
promoter	rDPI_54570	PSMD10	0.726885	0.119202	0.00139761
promoter	rDPI_20097	PSKH1	0.125043	-0.589214	0.00140065
promoter	rDPI_34735	GNB1L	0.471749	-0.281951	0.0014015
promoter	rDPI_41732	ARL15	0.0158497	-0.656164	0.00140576
promoter	rDPI_684	TMCO4	0.253815	-0.494706	0.00140845
promoter	rDPI_42778	CDKN2AIPNL	0.329102	-0.429939	0.00141074
promoter	rDPI_38102	NCK1	0.577193	-0.142267	0.00141384
promoter	rDPI_27496	ZNF418	0.24501	-0.501349	0.00141928
promoter	rDPI_37630	ZBTB20	0.476152	-0.275862	0.00141949
promoter	rDPI_45540	SNHG5	0.514895	-0.227517	0.0014245
promoter	rDPI_27363	ZNF784	0.492442	-0.255564	0.00143044
promoter	rDPI_37091	DCP1A	0.757924	0.188583	0.00143407
promoter	rDPI_18290	WDR73	0.477032	-0.273648	0.00144425
promoter	rDPI_24976	ZNF426	0.11469	-0.594533	0.00144608
promoter	rDPI_5918	EPC1	0.587099	-0.125845	0.00144811
promoter	rDPI_24796	RPL36	0.443131	-0.312398	0.00145657
promoter	rDPI_29758	GPD2	0.404828	-0.353546	0.00146501
promoter	rDPI_16430	IFI27L2	0.433005	-0.323284	0.00146502
promoter	rDPI_4893	EPHX1	0.574332	-0.143743	0.00146887
promoter	rDPI_37890	MGLL	-0.745817	-0.163487	0.00147323
promoter	rDPI_12598	DCN	0.283974	-0.466659	0.00148754
promoter	rDPI_2752	CD58	0.493982	-0.250398	0.00150062
promoter	rDPI_26085	ZNF850	0.350014	-0.40632	0.00151087
promoter	rDPI_1281	KIAA0319L	0.317434	-0.436397	0.00151279
promoter	rDPI_776	ZBTB40	0.694305	0.0596009	0.00151309
promoter	rDPI_21505	SSH2	0.562224	-0.159059	0.00151408
promoter	rDPI_39943	TMEM150C	0.514675	-0.223457	0.00151698
promoter	rDPI_8377	SPTY2D1OS	0.252495	-0.491569	0.00152027
promoter	rDPI_44386	ZSCAN31	0.463824	-0.285826	0.00152059
promoter	rDPI_14392	DNAJC3	0.674713	0.023619	0.00153034
promoter	rDPI_29998	KLHL23	0.483416	-0.262023	0.00153055
promoter	rDPI_32021	XRCC5	0.37643	-0.379564	0.00153616
promoter	rDPI_23019	UNK	0.666568	0.00941068	0.00154277
promoter	rDPI_52206	SLC44A1	0.514235	-0.222719	0.00154584
promoter	rDPI_37467	LNP1	0.140674	-0.573919	0.00154637
promoter	rDPI_21426	SLC46A1	0.567287	-0.150202	0.00154849
promoter	rDPI_33652	ZMYND8	0.576973	-0.135993	0.00155073
promoter	rDPI_23589	PPP4R1	0.667229	0.0118095	0.00156852
promoter	rDPI_20053	ATP6V0D1	0.350895	-0.403183	0.00156881
promoter	rDPI_7840	GATD1	0.299824	-0.449867	0.00156984
promoter	rDPI_14675	RNASE4	0.719841	0.113113	0.00157293
promoter	rDPI_6106	TIMM23B-AGAP6	0.558482	-0.161458	0.00157742
promoter	rDPI_54953	MTM1	0.737452	0.150386	0.00158116
promoter	rDPI_48142	LAMTOR4	0.404608	-0.348195	0.00159852
promoter	rDPI_45066	RPL7L1	0.603389	-0.0931841	0.00161209
promoter	rDPI_50282	ZFAND1	0.715658	0.10647	0.00161435
promoter	rDPI_21249	PLD6	0.1957	-0.532349	0.00161739
promoter	rDPI_11100	M6PR	0.730187	0.13747	0.00163719
promoter	rDPI_44295	H2BC5	0.0581156	-0.624611	0.00163879
promoter	rDPI_52062	ERCC6L2	0.7183	0.113482	0.00165133
promoter	rDPI_42050	DMGDH	0.0501907	-0.628855	0.00166033
promoter	rDPI_18855	ELOB	0.348033	-0.402076	0.00166997
promoter	rDPI_3019	MRPS21	0.528984	-0.197809	0.00167321
promoter	rDPI_25369	MISP3	0.320736	-0.427355	0.00167457
promoter	rDPI_35726	ALG12	0.317655	-0.42957	0.00169103
promoter	rDPI_18549	MEF2A	0.475931	-0.264237	0.00169186
promoter	rDPI_51181	SMARCA2	0.445553	-0.299665	0.00169368
promoter	rDPI_21111	RPL26	0.137364	-0.571468	0.0017018
promoter	rDPI_25497	KLF2	0.564329	-0.147618	0.00170343
promoter	rDPI_45067	C6orf226	0.436307	-0.30963	0.00170508
promoter	rDPI_35005	ZMAT5	0.62012	-0.0623688	0.00170848
promoter	rDPI_36295	PDCD6IP	0.474611	-0.264975	0.00171296
promoter	rDPI_23346	LRRC45	0.584898	-0.116803	0.0017186
promoter	rDPI_39993	AFF1	0.601188	-0.0918925	0.00171992
promoter	rDPI_8560	CAT	0.315233	-0.430677	0.00172192
promoter	rDPI_32982	ZNF133	0.612415	-0.0739937	0.00172582
promoter	rDPI_22057	CD300LG	0.454578	-0.28804	0.00172632
promoter	rDPI_11042	PHB2	0.324699	-0.421635	0.0017337
promoter	rDPI_38665	ABCC5	0.500366	-0.232315	0.00173701
promoter	rDPI_24936	CD320	0.292779	-0.450052	0.00173844
promoter	rDPI_10565	HSPA8	-0.635309	0.0358106	0.00174492
promoter	rDPI_55097	FAM3A	0.70179	0.0846961	0.00174907
promoter	rDPI_5354	CEP170	0.668329	0.0225118	0.00176615
promoter	rDPI_46737	IQCE	0.595465	-0.0985353	0.00177227
promoter	rDPI_14244	NEK3	0.584678	-0.114773	0.00177525
promoter	rDPI_12036	RPL41	0.498385	-0.232868	0.00178603
promoter	rDPI_27233	TSEN34	0.546375	-0.169392	0.00178932
promoter	rDPI_3219	CHTOP	0.170825	-0.545266	0.00179185
promoter	rDPI_26398	CCDC97	0.0379278	-0.632478	0.00180776
promoter	rDPI_11910	HNRNPA1	0.775315	0.245416	0.00181986
promoter	rDPI_27168	ZNF600	0.709935	0.103702	0.00182014
promoter	rDPI_25171	ZNF439	0.349354	-0.395433	0.00182125
promoter	rDPI_51135	ZNF252P	0.627604	-0.0453927	0.00182257
promoter	rDPI_17931	MYO9A	0.676914	0.0405951	0.00182499
promoter	rDPI_51481	C9orf24	0.49002	-0.241541	0.00183198
promoter	rDPI_6889	IDE	0.680217	0.0470534	0.00183365
promoter	rDPI_49866	PLEKHA2	0.611314	-0.0712259	0.00183526
promoter	rDPI_14209	TRIM13	0.352656	-0.391189	0.00185236
promoter	rDPI_35070	INPP5J	0.561344	-0.145773	0.00185398
promoter	rDPI_8168	ZNF143	0.39272	-0.350963	0.00185543
promoter	rDPI_9969	DLG2	0.540431	-0.174743	0.00186131
promoter	rDPI_8354	SERGEF	0.22894	-0.499135	0.00186371
promoter	rDPI_10677	KCNJ5	0.436087	-0.303725	0.00186918
promoter	rDPI_150	MMP23B	0.615497	-0.0627378	0.00188089
promoter	rDPI_33520	SERINC3	0.581156	-0.115327	0.00189347
promoter	rDPI_16676	SIVA1	0.062078	-0.615015	0.00191765
promoter	rDPI_7914	CTSD	0.436087	-0.30188	0.00192103
promoter	rDPI_1734	TUT4	0.545494	-0.164964	0.00193519
promoter	rDPI_6866	PPP1R3C	0.57103	-0.128059	0.00195122
promoter	rDPI_37778	MYLK-AS1	-0.0453478	-0.676646	0.00195891
promoter	rDPI_26868	SPHK2	0.53933	-0.172529	0.00195995
promoter	rDPI_24087	POLI	0.370267	-0.369969	0.00196955
promoter	rDPI_10997	MLF2	0.0695327	0.689193	0.00197873
promoter	rDPI_16308	NRDE2	0.485177	-0.242094	0.00197984
promoter	rDPI_29406	ZC3H6	0.47373	-0.255749	0.00198803
promoter	rDPI_40093	PYURF	0.609553	-0.068089	0.00198852
promoter	rDPI_8464	LIN7C	0.731948	0.155553	0.00199707
promoter	rDPI_4224	TMEM9	0.422879	-0.313689	0.00200405
promoter	rDPI_49900	GPAT4	0.289037	-0.444885	0.00200418
promoter	rDPI_54795	PHF6	0.512474	-0.206481	0.00201085
promoter	rDPI_25524	HAUS8	0.287716	-0.445808	0.00201197
promoter	rDPI_22742	CEP95	0.419577	-0.317011	0.00201283
promoter	rDPI_45084	PPP2R5D	0.640152	-0.0169761	0.00201525
promoter	rDPI_25216	ZNF791	0.488479	-0.236743	0.00201598
promoter	rDPI_10464	SLC37A4	0.181611	-0.531057	0.00201914
promoter	rDPI_27361	ZNF524	0.550117	-0.154815	0.0020367
promoter	rDPI_2366	TLCD4	0.316774	-0.418314	0.00206179
promoter	rDPI_54973	NSDHL	0.508071	-0.210356	0.00206271
promoter	rDPI_36292	CLASP2	0.635089	-0.0234344	0.0020719
promoter	rDPI_45747	CDC40	0.594364	-0.0885711	0.00207598
promoter	rDPI_17193	TMEM87A	0.747137	0.191719	0.0021002
promoter	rDPI_52581	PDCL	0.504329	-0.213862	0.00210056
promoter	rDPI_44369	ZKSCAN8	0.647416	-0.00110714	0.00211081
promoter	rDPI_45248	SLC25A27	0.418036	-0.315165	0.00212113
promoter	rDPI_7542	FAM204A	0.633108	-0.023988	0.00214965
promoter	rDPI_42059	JMY	0.659304	0.0212202	0.00215598
promoter	rDPI_29718	RIF1	0.76761	0.23988	0.002171
promoter	rDPI_32174	ABCB6	0.496184	-0.221797	0.00217276
promoter	rDPI_39627	CLOCK	0.0691223	-0.604682	0.00217414
promoter	rDPI_49055	ATP6V0E2	0.108526	-0.578849	0.00217538
promoter	rDPI_26501	ZNF428	0.50565	-0.209618	0.0021767
promoter	rDPI_41458	GOLPH3	0.617698	-0.0477915	0.00219232
promoter	rDPI_21616	SLFN5	0.618359	-0.0457617	0.00222066
promoter	rDPI_49598	PEBP4	0.0741854	-0.600253	0.00222869
promoter	rDPI_34146	RNA5-8SN1	-0.618697	0.0447879	0.00223331
promoter	rDPI_33447	SNHG11	0.602729	-0.0691961	0.00226257
promoter	rDPI_48069	TRRAP	0.713017	0.126029	0.00226674
promoter	rDPI_11211	ATF7IP	0.606251	-0.0634759	0.00226844
promoter	rDPI_35552	SMDT1	0.306428	-0.421635	0.00227618
promoter	rDPI_39958	LIN54	0.6527	0.0140238	0.00228568
promoter	rDPI_44382	ZSCAN26	0.507631	-0.203529	0.00228626
promoter	rDPI_48537	CADPS2	0.497725	-0.215707	0.00230199
promoter	rDPI_2968	H2AC20	0.122615	-0.566301	0.00230598
promoter	rDPI_47311	POLM	0.298723	-0.42754	0.00231507
promoter	rDPI_45818	TSPYL1	0.637951	-0.00996424	0.00232504
promoter	rDPI_52832	PHYHD1	0.154535	-0.543051	0.00233797
promoter	rDPI_50396	VIRMA	0.456339	-0.264975	0.00234188
promoter	rDPI_32790	LZTS3	0.468667	-0.249844	0.00235812
promoter	rDPI_25340	CCDC130	0.658863	0.0274939	0.00236767
promoter	rDPI_45656	POPDC3	0.14683	-0.547849	0.00237081
promoter	rDPI_13522	KMT5A	0.574112	-0.108869	0.00237914
promoter	rDPI_47504	ZNF680	0.409671	-0.316457	0.00237963
promoter	rDPI_44141	DTNBP1	0.71874	0.141345	0.00238542
promoter	rDPI_12817	TXNRD1	0.389198	-0.337677	0.00239848
promoter	rDPI_25884	ZNF302	0.47329	-0.242832	0.0024061
promoter	rDPI_5090	SPRTN	0.449956	-0.270326	0.00241319
promoter	rDPI_54707	THOC2	0.449956	-0.269957	0.0024259
promoter	rDPI_16425	IFI27L1	0.231142	-0.482159	0.00243469
promoter	rDPI_21430	PIGS	0.45656	-0.261838	0.00243954
promoter	rDPI_52195	NIPSNAP3A	0.630246	-0.0190059	0.00244614
promoter	rDPI_54017	PQBP1	0.780158	0.277523	0.00244791
promoter	rDPI_3470	MEF2D	0.455239	-0.26313	0.00244857
promoter	rDPI_1985	WLS	0.643894	0.00405951	0.00244917
promoter	rDPI_2025	TYW3	0.853683	0.469427	0.00246526
promoter	rDPI_36545	ZNF197-AS1	0.0455679	-0.61317	0.00248667
promoter	rDPI_117	MRPL20	0.573451	-0.105732	0.00251322
promoter	rDPI_43646	HIGD2A	0.0138826	-0.632034	0.00251649
promoter	rDPI_54100	SMC1A	0.777736	0.273832	0.00251867
promoter	rDPI_10342	C11orf71	0.325799	-0.397278	0.00252129
promoter	rDPI_12241	OS9	0.269885	-0.447653	0.00252239
promoter	rDPI_26034	POLR2I	0.488259	-0.220505	0.00254045
promoter	rDPI_34763	ZNF74	-0.0299383	-0.656902	0.00255926
promoter	rDPI_49269	CLN8	0.667889	0.0496367	0.00256438
promoter	rDPI_45441	CD109	0.313912	-0.407242	0.00256656
promoter	rDPI_48839	STMP1	-0.238626	0.472933	0.00256731
promoter	rDPI_51503	IL11RA	0.455899	-0.258517	0.00258481
promoter	rDPI_31507	NUP35	0.641473	0.00405951	0.00258575
promoter	rDPI_54478	TCEAL8	0.657983	0.0330296	0.00259957
promoter	rDPI_36684	DHX30	0.44159	-0.274755	0.00259964
promoter	rDPI_13423	ANAPC5	0.521059	-0.17622	0.00261104
promoter	rDPI_8874	SERPING1	0.697607	0.106654	0.00262161
promoter	rDPI_21548	RAB11FIP4	0.201643	-0.501349	0.00262199
promoter	rDPI_54032	GRIPAP1	0.671851	0.0586013	0.00262577
promoter	rDPI_27426	ZNF805	0.40879	-0.310552	0.00263015
promoter	rDPI_16565	MOK	0.498605	-0.204636	0.0026405
promoter	rDPI_45757	GTF3C6	0.274728	-0.440457	0.00264905
promoter	rDPI_40325	SEC24B	0.615057	-0.0374582	0.0026587
promoter	rDPI_23240	RPTOR	0.346492	-0.373844	0.00266408
promoter	rDPI_35759	NCAPH2	0.386777	-0.33288	0.00267345
promoter	rDPI_15975	ZFP36L1	0.269445	-0.444332	0.00268001
promoter	rDPI_3924	KLHL20	0.745156	0.20519	0.00268177
promoter	rDPI_47929	KRIT1	0.658203	0.0357975	0.00268199
promoter	rDPI_32382	TRIP12	0.345391	-0.374397	0.00268532
promoter	rDPI_48602	RBM28	0.563325	-0.115327	0.00269222
promoter	rDPI_33478	CHD6	0.390739	-0.328082	0.00269867
promoter	rDPI_52790	GLE1	0.713237	0.140238	0.00272619
promoter	rDPI_9547	BBS1	0.47373	-0.233237	0.00272955
promoter	rDPI_4411	PPFIA4	0.454578	-0.255933	0.00273923
promoter	rDPI_50411	PLEKHF2	0.575652	-0.095952	0.00274009
promoter	rDPI_20199	CMTR2	0.412753	-0.303356	0.0027418
promoter	rDPI_50556	UBR5	0.762767	0.245969	0.00275815
promoter	rDPI_3326	PMVK	0.354417	-0.363695	0.0027602
promoter	rDPI_35567	POLDIP3	0.274508	-0.437689	0.00277909
promoter	rDPI_32156	ZNF142	0.663266	0.047976	0.00279694
promoter	rDPI_3416	GON4L	0.651599	0.0276785	0.00280508
promoter	rDPI_41623	PLCXD3	0.539991	-0.144851	0.00281856
promoter	rDPI_51823	NMRK1	0.236865	-0.468689	0.00282519
promoter	rDPI_44286	H2AC6	0.250734	-0.456879	0.00283563
promoter	rDPI_28792	PCYOX1	0.159378	-0.529028	0.00283613
promoter	rDPI_5575	CELF2	0.593704	-0.0660593	0.00283686
promoter	rDPI_29105	MAL	0.365204	-0.350963	0.00284068
promoter	rDPI_47114	SCRN1	0.376651	-0.3386	0.00286882
promoter	rDPI_15417	ARHGAP5	0.317434	-0.396725	0.00287308
promoter	rDPI_33442	KIAA1755	0.322718	-0.391742	0.00287355
promoter	rDPI_12220	MBD6	0.309289	-0.40429	0.00287386
promoter	rDPI_29060	RNU2-63P	-0.613131	0.0344776	0.00287806
promoter	rDPI_37708	GTF2E1	0.145289	-0.538438	0.00288314
promoter	rDPI_9289	RASGRP2	0.403507	-0.30963	0.00289483
promoter	rDPI_26065	ZFP82	0.639051	0.00904163	0.00291143
promoter	rDPI_54037	WDR45	0.634208	0.000922615	0.00291235
promoter	rDPI_11930	PPP1R1A	0.324479	-0.389159	0.0029142
promoter	rDPI_9918	AAMDC	0.301805	-0.410195	0.00291814
promoter	rDPI_42560	ATG12	0.753081	0.228993	0.00293489
promoter	rDPI_52590	RABGAP1	0.0380833	-0.609849	0.00293971
promoter	rDPI_7656	LHPP	0.184253	-0.508176	0.00294477
promoter	rDPI_1294	AGO1	0.429043	-0.279737	0.00296509
promoter	rDPI_2553	GSTM5	0.511045	-0.179976	0.00296582
promoter	rDPI_45178	SLC29A1	0.398884	-0.312767	0.00297237
promoter	rDPI_28586	AFTPH	0.582917	-0.0784223	0.00299081
promoter	rDPI_36817	LAMB2	0.566187	-0.102964	0.00299977
promoter	rDPI_18045	ULK3	-0.103904	-0.69067	0.00301017
promoter	rDPI_753	ECE1	0.430143	-0.277154	0.00302136
promoter	rDPI_44302	H4C5	0.276709	-0.430492	0.00302343
promoter	rDPI_32127	PNKD	0.316554	-0.394141	0.00302773
promoter	rDPI_8151	TMEM9B-AS1	0.344951	-0.366832	0.00302957
promoter	rDPI_35287	NOL12	-0.451963	0.251744	0.0030304
promoter	rDPI_26503	CADM4	0.256897	-0.447468	0.00303527
promoter	rDPI_52826	KYAT1	0.369826	-0.341737	0.00303662
promoter	rDPI_51524	STOML2	-0.254036	-0.763187	0.00304437
promoter	rDPI_43427	HAVCR2	0.628705	-0.00461308	0.00305217
promoter	rDPI_4190	DENND1B	0.458321	-0.24357	0.00305752
promoter	rDPI_39779	ANKRD17	0.594144	-0.0596009	0.00305875
promoter	rDPI_33286	CPNE1	0.457	-0.245047	0.00306151
promoter	rDPI_4351	LGR6	0.188215	-0.502641	0.00307456
promoter	rDPI_24707	ZBTB7A	0.27693	-0.429201	0.00307653
promoter	rDPI_2667	LRIG2	0.678015	0.0821128	0.00308198
promoter	rDPI_2548	GSTM2	0.204065	-0.489909	0.00309085
promoter	rDPI_43166	ABLIM3	0.542192	-0.134517	0.00310358
promoter	rDPI_38136	PIK3CB	0.143528	-0.535486	0.00311408
promoter	rDPI_12528	METTL25	0.624082	-0.0103333	0.00312752
promoter	rDPI_12814	NFYB	0.443131	-0.259624	0.00313446
promoter	rDPI_44913	SRSF3	0.639051	0.0149464	0.00314275
promoter	rDPI_17139	CHAC1	-0.194379	0.496552	0.00314349
promoter	rDPI_21567	LOC105371730	0.106986	-0.560766	0.00315393
promoter	rDPI_7768	MTG1	0.541311	-0.134148	0.00316923
promoter	rDPI_12413	FRS2	0.641253	0.019744	0.00318638
promoter	rDPI_21972	TUBG2	0.447534	-0.252981	0.00320054
promoter	rDPI_860	MYOM3	0.226519	-0.468873	0.00324476
promoter	rDPI_41988	NSA2	0.518417	-0.163303	0.00325272
promoter	rDPI_5974	ZNF248	0.584898	-0.0686426	0.00326634
promoter	rDPI_818	ASAP3	0.608453	-0.0319225	0.00327612
promoter	rDPI_12469	TBC1D15	0.727325	0.182678	0.00328119
promoter	rDPI_54344	ATRX	0.577854	-0.0787913	0.00328473
promoter	rDPI_38924	UBXN7	0.524581	-0.153708	0.00331076
promoter	rDPI_37535	CD47	0.383695	-0.32107	0.00332568
promoter	rDPI_34400	HLCS	-0.0396243	-0.650813	0.00333263
promoter	rDPI_30125	WIPF1	0.502127	-0.182493	0.00334784
promoter	rDPI_25755	ZNF676	0.65358	0.0448391	0.00335013
promoter	rDPI_4353	PPP1R12B	0.683519	0.0989044	0.00335851
promoter	rDPI_44844	SNRPC	0.526783	-0.14891	0.00339107
promoter	rDPI_45061	BICRAL	0.681097	0.0952139	0.00339336
promoter	rDPI_2928	GPR89B	0.00242613	-0.624873	0.00340501
promoter	rDPI_50490	OSR2	0.494203	-0.190612	0.00344044
promoter	rDPI_38690	PSMD2	-0.720659	-0.173468	0.00347599
promoter	rDPI_33899	SS18L1	0.483636	-0.20316	0.00347727
promoter	rDPI_45835	KPNA5	0.289257	-0.410195	0.00348374
promoter	rDPI_3073	PRUNE1	0.449075	-0.244862	0.00348908
promoter	rDPI_6022	ZNF22	0.576313	-0.0760235	0.00350634
promoter	rDPI_22722	TEX2	0.466025	-0.223826	0.00352579
promoter	rDPI_33874	FAM217B	0.353096	-0.347826	0.0035582
promoter	rDPI_52323	ZNF483	0.449735	-0.242463	0.00356669
promoter	rDPI_10080	CEP57	0.715658	0.165702	0.00358101
promoter	rDPI_9110	UQCC3	0.460302	-0.229547	0.00358278
promoter	rDPI_12068	RNF41	0.252274	-0.44101	0.00358647
promoter	rDPI_4610	CD46	0.239287	-0.451897	0.00359681
promoter	rDPI_5828	ANKRD26	0.509832	-0.166809	0.0036066
promoter	rDPI_21323	CCDC144B	0.575652	-0.0747318	0.00361018
promoter	rDPI_29145	SNRNP200	0.570369	-0.0824818	0.0036133
promoter	rDPI_49399	DLC1	0.629806	0.0108869	0.00363792
promoter	rDPI_11278	PLEKHA5	0.505429	-0.171791	0.00364363
promoter	rDPI_840	PITHD1	0.508291	-0.166993	0.00369444
promoter	rDPI_42690	FNIP1	0.402847	-0.292654	0.00371737
promoter	rDPI_3932	RC3H1	0.426181	-0.266267	0.00373851
promoter	rDPI_38978	LOC220729	0.414521	-0.279327	0.00374103
promoter	rDPI_40373	TIFA	0.268564	-0.424034	0.00374545
promoter	rDPI_46878	ICA1	0.681537	0.104071	0.00376386
promoter	rDPI_23141	SEPTIN9	0.617918	-0.00572021	0.00377242
promoter	rDPI_37003	WDR82	0.690123	0.120309	0.00377509
promoter	rDPI_44451	HLA-E	0.748018	0.236743	0.00378353
promoter	rDPI_43178	GRPEL2	0.540651	-0.120678	0.00382091
promoter	rDPI_43935	PSMG4	0.663046	0.071964	0.00383075
promoter	rDPI_48185	MOSPD3	0.534047	-0.129535	0.00383484
promoter	rDPI_42667	SLC27A6	-0.439169	0.248737	0.00387342
promoter	rDPI_11082	FOXJ2	0.466466	-0.216076	0.00388258
promoter	rDPI_12483	KRR1	0.715878	0.172714	0.00390247
promoter	rDPI_46650	PRKAR1B	0.318975	-0.374766	0.00391304
promoter	rDPI_14539	NAXD	0.50631	-0.165148	0.00391467
promoter	rDPI_13224	DDX54	0.662606	0.0730711	0.00392393
promoter	rDPI_38220	LOC100289361	0.381934	-0.310921	0.00394164
promoter	rDPI_41067	CDKN2AIP	0.70179	0.145958	0.00394543
promoter	rDPI_16211	IRF2BPL	0.57213	-0.0727021	0.00396023
promoter	rDPI_41683	NNT	0.385896	-0.306308	0.00396419
promoter	rDPI_662	EMC1-AS1	0.50587	-0.164595	0.00397254
promoter	rDPI_23692	ESCO1	0.281993	-0.408165	0.00397334
promoter	rDPI_34905	LRRC75B	0.698047	0.139499	0.00398268
promoter	rDPI_3962	CRYZL2P	0.404608	-0.285642	0.00398803
promoter	rDPI_14127	ZC3H13	0.449295	-0.234529	0.00399648
promoter	rDPI_9342	FAU	0.772893	0.295606	0.00399734
promoter	rDPI_33708	PEDS1	0.215292	-0.465183	0.00400529
promoter	rDPI_18070	COMMD4	0.383475	-0.307415	0.00404608
promoter	rDPI_10651	TIRAP	0.446433	-0.236928	0.00404926
promoter	rDPI_15376	STXBP6	0.573891	-0.0682735	0.0040527
promoter	rDPI_19925	GINS3	0.370047	-0.32107	0.00407161
promoter	rDPI_16083	ZNF410	0.29388	-0.395617	0.00407503
promoter	rDPI_38621	FXR1	0.612635	-0.00811901	0.00407514
promoter	rDPI_50427	UQCRB	0.63707	0.032107	0.0040823
promoter	rDPI_36092	BTD	0.480114	-0.195225	0.00409324
promoter	rDPI_41901	CDK7	-0.512034	0.154077	0.00409843
promoter	rDPI_28119	BIRC6	0.717199	0.179356	0.00411187
promoter	rDPI_21003	ZBTB4	0.306207	-0.383439	0.00411682
promoter	rDPI_50995	PLEC	0.654461	0.0625533	0.00411751
promoter	rDPI_21840	CASC3	0.360801	-0.32882	0.00417573
promoter	rDPI_20093	EDC4	0.311491	-0.376981	0.0042063
promoter	rDPI_49060	ZBED6CL	0.615497	-0.000922615	0.0042108
promoter	rDPI_10749	KDM5A	0.698047	0.143928	0.00421598
promoter	rDPI_12758	WASHC3	0.373569	-0.314612	0.00423338
promoter	rDPI_14340	FBXL3	0.658643	0.072333	0.00424754
promoter	rDPI_26970	PIH1D1	0.175007	-0.493599	0.00426457
promoter	rDPI_19984	DYNC1LI2	0.66987	0.0928151	0.00427586
promoter	rDPI_53802	DMD	0.178089	-0.490831	0.00428989
promoter	rDPI_27475	ZNF154	0.396022	-0.289517	0.00430077
promoter	rDPI_50373	RBM12B	0.468007	-0.206297	0.00430866
promoter	rDPI_8069	CAVIN3	-0.553343	0.0927373	0.00434244
promoter	rDPI_27805	HS1BP3	0.248532	-0.431968	0.00434408
promoter	rDPI_1784	TMEM59	0.422219	-0.259624	0.00434779
promoter	rDPI_3330	PBXIP1	0.387878	-0.297267	0.00436285
promoter	rDPI_11965	BLOC1S1	0.545934	-0.102595	0.00437871
promoter	rDPI_15358	DHRS1	0.527003	-0.128428	0.00440072
promoter	rDPI_26120	ZNF570	0.200103	-0.471456	0.00441985
promoter	rDPI_4640	HSD11B1-AS1	0.191737	-0.478099	0.00442666
promoter	rDPI_16145	FOS	0.556002	-0.0873257	0.00443113
promoter	rDPI_48378	LAMB1	0.504329	-0.157952	0.00444205
promoter	rDPI_54831	ZNF449	0.434766	-0.24357	0.0044451
promoter	rDPI_43430	CYFIP2	0.0499706	-0.581063	0.00445883
promoter	rDPI_2127	GIPC2	0.626063	0.0208511	0.00445978
promoter	rDPI_14579	PCID2	0.280232	-0.401891	0.00447237
promoter	rDPI_42368	LNPEP	0.241708	-0.435843	0.00448134
promoter	rDPI_2969	H2AC21	0.289918	-0.39285	0.00448324
promoter	rDPI_38376	SLC66A1L	0.311271	-0.372737	0.00448841
promoter	rDPI_45395	LMBRD1	0.374449	-0.309445	0.00449006
promoter	rDPI_34858	CHCHD10	0.594144	-0.0293392	0.00449711
promoter	rDPI_33301	SCAND1	0.731288	0.214785	0.00450197
promoter	rDPI_47542	GS1-124K5.4	0.554299	-0.088202	0.00451939
promoter	rDPI_6320	TYSND1	0.373569	-0.309814	0.0045247
promoter	rDPI_20306	MON1B	0.55496	-0.0870949	0.00452853
promoter	rDPI_16039	DPF3	0.42486	-0.253535	0.00453089
promoter	rDPI_35106	YWHAH	0.383915	-0.298374	0.00455456
promoter	rDPI_17520	ZNF280D	0.70267	0.159612	0.0046008
promoter	rDPI_54279	OGT	0.582917	-0.0442855	0.00462278
promoter	rDPI_50209	STAU2	0.736351	0.227332	0.00462842
promoter	rDPI_1638	LRRC41	0.658203	0.0784223	0.00463035
promoter	rDPI_48269	RASA4	-0.313922	0.367987	0.00463434
promoter	rDPI_45130	ABCC10	0.108086	-0.538438	0.00466443
promoter	rDPI_27083	C19orf81	0.0475491	0.639926	0.00466445
promoter	rDPI_18422	NGRN	0.250954	-0.425141	0.00466923
promoter	rDPI_34350	ITSN1	0.258658	-0.418314	0.00467299
promoter	rDPI_48588	ARF5	0.288817	-0.39082	0.00468895
promoter	rDPI_25798	PLEKHF1	0.214191	-0.456141	0.00469215
promoter	rDPI_24101	TCF4	0.225198	-0.446915	0.00469355
promoter	rDPI_49841	NSD3	0.641033	0.0500057	0.0046986
promoter	rDPI_50413	C8orf37	0.468447	-0.1991	0.00469876
promoter	rDPI_1301	TRAPPC3	-0.606251	0.00664283	0.0047139
promoter	rDPI_41666	PAIP1	-0.551861	0.0883105	0.00471518
promoter	rDPI_50003	LOC102724330	0.617698	0.0118095	0.00472275
promoter	rDPI_21084	PER1	0.581596	-0.0442855	0.00473914
promoter	rDPI_10741	THYN1	0.517537	-0.135255	0.00474662
promoter	rDPI_35317	PLA2G6	0.129219	-0.522016	0.00474702
promoter	rDPI_44349	H4C11	-0.545827	0.0962021	0.00475488
promoter	rDPI_15565	PRPF39	0.626944	0.0274939	0.00475813
promoter	rDPI_22849	ABCA8	0.527883	-0.121047	0.00475898
promoter	rDPI_26326	PLD3	0.374229	-0.304648	0.00481143
promoter	rDPI_34882	CABIN1	0.394041	-0.283058	0.00483464
promoter	rDPI_52859	PTPA	-0.779057	-0.323469	0.00484234
promoter	rDPI_22004	RUNDC1	0.449075	-0.220136	0.00484898
promoter	rDPI_40823	MAP9	0.483416	-0.17788	0.00485588
promoter	rDPI_2918	ACP6	0.504109	-0.151124	0.00486401
promoter	rDPI_22461	TOM1L1	0.470868	-0.19338	0.00486755
promoter	rDPI_16144	TMED10	0.5226	-0.126398	0.00487019
promoter	rDPI_45542	ZNF292	0.537569	-0.105732	0.00487798
promoter	rDPI_11437	IPO8	0.381714	-0.295606	0.00488384
promoter	rDPI_33199	PXMP4	0.430804	-0.240987	0.00488729
promoter	rDPI_12038	ZC3H10	0.370267	-0.307415	0.00490453
promoter	rDPI_52242	TMEM245	0.475711	-0.186737	0.00490695
promoter	rDPI_20668	SMG6	0.482315	-0.178434	0.00490813
promoter	rDPI_14342	MYCBP2	0.541311	-0.099827	0.00491983
promoter	rDPI_53121	SEC16A	0.534928	-0.1085	0.00493314
promoter	rDPI_28484	REL	0.60361	-0.00701188	0.00494125
promoter	rDPI_26075	ZNF529-AS1	0.70157	0.163118	0.00494261
promoter	rDPI_30101	OLA1	0.730627	0.22069	0.00494905
promoter	rDPI_24863	TRIP10	0.690343	0.142083	0.0049571
promoter	rDPI_13666	CHFR	0.654901	0.0793449	0.00503362
promoter	rDPI_5168	TBCE	0.630246	0.0378272	0.00505492
promoter	rDPI_20347	MPHOSPH6	-0.481215	0.177142	0.00507896
promoter	rDPI_27142	PPP2R1A	-0.357719	0.317011	0.00514242
promoter	rDPI_20385	USP10	0.590402	-0.023619	0.00518585
promoter	rDPI_23824	DSG2	0.628485	0.0372737	0.00520432
promoter	rDPI_51013	EXOSC4	0.274068	-0.39654	0.00525734
promoter	rDPI_15959	PIGH	0.268124	-0.401891	0.00526054
promoter	rDPI_27513	ZNF274	0.677575	0.123261	0.00526174
promoter	rDPI_19077	DEXI	0.515115	-0.130273	0.00526431
promoter	rDPI_25122	RAB3D	0.482756	-0.172345	0.00526643
promoter	rDPI_26062	LINC00665	0.574552	-0.0461308	0.00527928
promoter	rDPI_25002	COL5A3	0.384796	-0.286195	0.00530277
promoter	rDPI_22989	CASKIN2	0.518638	-0.124738	0.00531772
promoter	rDPI_44633	SNHG32	0.436968	-0.227148	0.00533134
promoter	rDPI_13441	SETD1B	0.618799	0.0234344	0.00533389
promoter	rDPI_47264	CDK13	0.599867	-0.00664283	0.00533618
promoter	rDPI_772	CDC42	0.705972	0.17788	0.00535373
promoter	rDPI_47944	RBM48	0.385236	-0.284904	0.00536104
promoter	rDPI_47508	ZNF138	0.551218	-0.0787913	0.005369
promoter	rDPI_8431	HTATIP2	0.577193	-0.0404105	0.00539591
promoter	rDPI_7444	CASP7	0.413413	-0.252797	0.00543292
promoter	rDPI_35743	TUBGCP6	0.311711	-0.358713	0.00545106
promoter	rDPI_38221	U2SURP	0.407029	-0.259624	0.00545753
promoter	rDPI_14039	NAA16	0.561124	-0.0631069	0.00546342
promoter	rDPI_39013	ZNF718	0.634208	0.0507438	0.00546509
promoter	rDPI_3293	HAX1	0.138245	-0.5067	0.00547996
promoter	rDPI_16216	CIPC	0.0446874	-0.573313	0.00549707
promoter	rDPI_39763	MOB1B	0.271646	-0.395617	0.00550236
promoter	rDPI_17791	DPP8	0.224758	-0.436582	0.00553087
promoter	rDPI_14665	APEX1	0.209788	-0.449129	0.00553778
promoter	rDPI_39060	TMEM175	0.377971	-0.290255	0.00553937
promoter	rDPI_25803	C19orf12	0.450396	-0.208142	0.00554685
promoter	rDPI_24996	UBL5	0.335045	-0.334356	0.00556046
promoter	rDPI_27851	DNAJC27	0.537129	-0.0957675	0.00556397
promoter	rDPI_24978	ZNF121	0.488919	-0.159612	0.00560119
promoter	rDPI_23602	APCDD1	0.625183	0.0378272	0.00560153
promoter	rDPI_13943	STARD13	0.487599	-0.161273	0.00560322
promoter	rDPI_25068	SLC44A2	0.302905	-0.365171	0.00560619
promoter	rDPI_7862	CD151	0.482756	-0.167362	0.00560841
promoter	rDPI_54343	MAGEE1	0.283754	-0.38292	0.00562803
promoter	rDPI_5644	CDNF	0.218154	-0.44101	0.00563054
promoter	rDPI_4344	LGR6	0.287716	-0.379195	0.00563103
promoter	rDPI_55059	TAZ	0.366524	-0.301142	0.00563218
promoter	rDPI_32867	CDS2	0.234003	-0.427171	0.00565462
promoter	rDPI_13377	DYNLL1	0.137144	-0.505593	0.0056578
promoter	rDPI_47142	MINDY4	0.57147	-0.0448391	0.00567395
promoter	rDPI_45720	SESN1	0.682638	0.138577	0.00567456
promoter	rDPI_51222	AK3	0.361241	-0.305939	0.00568784
promoter	rDPI_44186	FAM8A1	0.527883	-0.106654	0.00569508
promoter	rDPI_45746	FIG4	0.449956	-0.206297	0.00571756
promoter	rDPI_36568	LARS2	0.378852	-0.286933	0.00571791
promoter	rDPI_2972	BOLA1	0.169284	-0.479944	0.00572479
promoter	rDPI_18763	NDUFB10	0.468667	-0.183047	0.00574909
promoter	rDPI_48801	CALD1	0.549456	-0.0756545	0.00575557
promoter	rDPI_45479	HMGN3	-0.137364	-0.681075	0.00579246
promoter	rDPI_51096	C8orf82	0.488919	-0.156291	0.00583892
promoter	rDPI_8202	IRAG1	0.676914	0.130458	0.00584109
promoter	rDPI_45138	YIPF3	0.21177	-0.443962	0.00584199
promoter	rDPI_43428	HAVCR2	0.325759	-0.339891	0.00585142
promoter	rDPI_7694	UROS	0.283093	-0.380671	0.00586285
promoter	rDPI_34993	THOC5	0.507411	-0.13138	0.00589901
promoter	rDPI_1336	DNALI1	0.268785	-0.393219	0.00591523
promoter	rDPI_22862	ABCA5	0.621881	0.0369046	0.00591596
promoter	rDPI_49320	PPP1R3B	0.549236	-0.0732557	0.00594991
promoter	rDPI_11623	SLC48A1	0.384355	-0.277892	0.00595847
promoter	rDPI_38383	RSRC1	0.726225	0.226225	0.00596363
promoter	rDPI_24946	RAB11B-AS1	0.324919	-0.339338	0.0059639
promoter	rDPI_23879	ZNF271P	0.344731	-0.319409	0.00596679
promoter	rDPI_24460	RPS15	0.306207	-0.357237	0.00599376
promoter	rDPI_27254	LENG8	0.647637	0.0810056	0.00599641
promoter	rDPI_41548	NIPBL	0.44115	-0.212755	0.00601977
promoter	rDPI_33106	NANP	0.434106	-0.220874	0.00603393
promoter	rDPI_23701	MIB1	0.225198	-0.430308	0.00604276
promoter	rDPI_2383	SNX7	0.564646	-0.0496367	0.00604969
promoter	rDPI_42922	MATR3	0.553859	-0.0651366	0.00606033
promoter	rDPI_28936	HK2	-0.358159	0.304279	0.00607206
promoter	rDPI_40276	CXXC4	0.422439	-0.233606	0.00609741
promoter	rDPI_52398	HDHD3	0.525462	-0.104256	0.00610972
promoter	rDPI_10530	OAF	0.632447	0.0570176	0.00611609
promoter	rDPI_33109	ZNF337	0.646756	0.0813747	0.00613525
promoter	rDPI_35596	PACSIN2	0.666348	0.115511	0.00613752
promoter	rDPI_234	RPL22	0.709715	0.195963	0.00614043
promoter	rDPI_44709	HLA-Z	0.415835	-0.240434	0.00615516
promoter	rDPI_41015	HAND2	0.152113	-0.488617	0.00618014
promoter	rDPI_20249	LOC283922	0.607132	0.0173452	0.00621961
promoter	rDPI_39039	MYL5	0.573451	-0.0339522	0.00625008
promoter	rDPI_33707	UBE2V1	0.361021	-0.299112	0.00625097
promoter	rDPI_50898	LYNX1	0.274288	-0.383623	0.00631227
promoter	rDPI_14742	ABHD4	0.404167	-0.251505	0.00632428
promoter	rDPI_49928	VDAC3	0.417816	-0.236005	0.00632861
promoter	rDPI_17888	NOX5	0.370927	-0.287671	0.0063331
promoter	rDPI_54355	PGK1	0.503889	-0.130273	0.0063332
promoter	rDPI_40840	CTSO	0.685059	0.152047	0.00634631
promoter	rDPI_1892	ITGB3BP	0.411872	-0.242463	0.00635379
promoter	rDPI_22807	AMZ2	-0.16378	-0.691223	0.00637128
promoter	rDPI_11679	PRKAG1	0.127018	-0.505962	0.00637364
promoter	rDPI_32784	LZTS3	0.142207	-0.493968	0.00641391
promoter	rDPI_25546	MRPL34	0.297842	-0.360004	0.00644741
promoter	rDPI_46108	BCLAF1	0.509612	-0.121047	0.00646237
promoter	rDPI_52349	SUSD1	0.673833	0.133595	0.00650276
promoter	rDPI_36554	KIAA1143	0.363443	-0.293392	0.0065194
promoter	rDPI_19698	LONP2	0.545494	-0.0710414	0.00652057
promoter	rDPI_35448	RBX1	0.122175	-0.508176	0.00652439
promoter	rDPI_20360	HSBP1	0.508511	-0.120863	0.00659389
promoter	rDPI_9536	SLC29A2	0.523481	-0.100565	0.00660564
promoter	rDPI_22109	GPATCH8	0.429703	-0.21866	0.00662534
promoter	rDPI_31686	SF3B1	0.363663	-0.291915	0.00662705
promoter	rDPI_20730	ZZEF1	0.685059	0.155737	0.00664207
promoter	rDPI_23309	SLC25A10	0.0939976	-0.52792	0.00664505
promoter	rDPI_29964	NOSTRIN	0.521059	-0.103333	0.0066481
promoter	rDPI_25163	ZNF441	0.458321	-0.184154	0.00665074
promoter	rDPI_39203	LINC02482	0.551878	-0.0601545	0.00666334
promoter	rDPI_52112	XPA	0.47351	-0.165148	0.00666697
promoter	rDPI_44651	STK19	0.600087	0.0121785	0.00667939
promoter	rDPI_52701	STXBP1	0.594584	0.00369046	0.00668484
promoter	rDPI_49744	LEPROTL1	0.575432	-0.0252797	0.00669649
promoter	rDPI_368	CASZ1	0.405929	-0.244862	0.00671463
promoter	rDPI_55065	CH17-340M24.3	0.175447	-0.464629	0.00672967
promoter	rDPI_2120	DNAJB4	0.26108	-0.391004	0.00674814
promoter	rDPI_39017	ZNF141	0.566847	-0.0372737	0.00675594
promoter	rDPI_44440	TRIM26	0.265483	-0.38676	0.00677001
promoter	rDPI_44298	H3C4	0.304226	-0.350225	0.00677913
promoter	rDPI_20027	FBXL8	-0.211329	0.434183	0.00680097
promoter	rDPI_15933	MAX	0.27803	-0.374766	0.00680907
promoter	rDPI_24242	LINC00909	0.473147	-0.163672	0.00682768
promoter	rDPI_22496	AKAP1	0.419357	-0.228255	0.006829
promoter	rDPI_33679	ZNFX1	0.390079	-0.2611	0.00683534
promoter	rDPI_26857	GRWD1	0.525462	-0.0950294	0.00683613
promoter	rDPI_14193	PHF11	0.671411	0.13341	0.00684221
promoter	rDPI_364	PEX14	0.597226	0.00996424	0.00686183
promoter	rDPI_15360	NOP9	0.252274	-0.397463	0.00689369
promoter	rDPI_25889	ZNF181	0.451937	-0.188767	0.00691705
promoter	rDPI_19096	ZC3H7A	0.650058	0.0976127	0.0069765
promoter	rDPI_43192	CSNK1A1	0.390079	-0.259439	0.00698271
promoter	rDPI_55024	HCFC1	0.57147	-0.0271249	0.00703012
promoter	rDPI_25563	MVB12A	-0.753301	-0.294868	0.00704525
promoter	rDPI_37224	ADAMTS9-AS2	0.696829	0.182678	0.00707023
promoter	rDPI_33929	OGFR	0.575432	-0.0206666	0.00707716
promoter	rDPI_26101	ZNF585B	0.369166	-0.281029	0.0070789
promoter	rDPI_24815	RANBP3	0.691884	0.173636	0.00708813
promoter	rDPI_16296	FOXN3	0.158717	-0.474224	0.00713653
promoter	rDPI_1264	ZMYM1	0.450396	-0.188029	0.00714393
promoter	rDPI_32807	ADAM33	0.340549	-0.310183	0.00714639
promoter	rDPI_47361	NUDCD3	0.513354	-0.107208	0.00719478
promoter	rDPI_46602	WDR27	0.642573	0.0874639	0.00719808
promoter	rDPI_36301	EPM2AIP1	0.535148	-0.0771306	0.00721885
promoter	rDPI_13446	PSMD9	-0.698268	-0.187106	0.00722233
promoter	rDPI_27402	ZNF582	0.427722	-0.214047	0.00722759
promoter	rDPI_5880	SVIL	0.617918	0.0472379	0.00724105
promoter	rDPI_27817	UBXN2A	0.440049	-0.1991	0.00726437
promoter	rDPI_51103	ZNF251	0.663706	0.124738	0.00727035
promoter	rDPI_26573	TRAPPC6A	0.515336	-0.103517	0.00728434
promoter	rDPI_52566	NDUFA8	0.622981	0.056095	0.00729722
promoter	rDPI_47192	BBS9	0.608012	0.032107	0.00730288
promoter	rDPI_14705	CHD8	0.317875	-0.331219	0.00731733
promoter	rDPI_18881	HCFC1R1	0.468887	-0.163303	0.00732227
promoter	rDPI_40219	PPP3CA	0.683078	0.160166	0.00733236
promoter	rDPI_33450	PPP1R16B	0.176548	0.691961	0.00733353
promoter	rDPI_39403	RELL1	0.837173	0.491754	0.007335
promoter	rDPI_8433	PRMT3	0.0248752	-0.570361	0.00736451
promoter	rDPI_36445	ZNF621	0.248092	-0.39654	0.00736648
promoter	rDPI_21880	TMEM99	0.40835	-0.234529	0.00739362
promoter	rDPI_34920	LRP5L	0.537789	-0.0712259	0.00741291
promoter	rDPI_41315	ICE1	0.345171	-0.302249	0.00745202
promoter	rDPI_36764	IP6K2	0.438729	-0.198362	0.00747522
promoter	rDPI_36853	APEH	0.493322	-0.130458	0.00747837
promoter	rDPI_5080	ARV1	0.572571	-0.0202975	0.00747907
promoter	rDPI_11818	EIF4B	0.621441	0.055726	0.00748568
promoter	rDPI_42526	REEP5	0.524141	-0.0891246	0.00750088
promoter	rDPI_40876	C4orf46	0.389198	-0.254642	0.00751593
promoter	rDPI_52088	ZNF510	0.58516	-0.00083303	0.00752648
promoter	rDPI_36090	COLQ	0.0178309	0.597203	0.00754005
promoter	rDPI_1737	GPX7	0.402186	-0.23988	0.00754489
promoter	rDPI_50883	LY6K	0.27226	-0.372626	0.0075564
promoter	rDPI_27577	MZF1	0.647892	0.100565	0.00755832
promoter	rDPI_40040	SPARCL1	0.663927	0.128428	0.00756636
promoter	rDPI_26286	DYRK1B	0.204725	-0.432522	0.00756699
promoter	rDPI_50717	ATAD2	0.397343	-0.245047	0.00756953
promoter	rDPI_34408	PIGP	0.275829	-0.369046	0.00758266
promoter	rDPI_13510	C12orf65	0.525902	-0.0856187	0.00759958
promoter	rDPI_6876	BTAF1	0.531405	-0.0778687	0.00761437
promoter	rDPI_25606	PDE4C	0.088873	0.64048	0.00763698
promoter	rDPI_18075	SIN3A	0.463384	-0.166255	0.00767812
promoter	rDPI_11830	TNS2	0.374009	-0.269404	0.00768977
promoter	rDPI_16332	DGLUCY	0.515776	-0.0983508	0.0076952
promoter	rDPI_46322	ULBP2	-0.215954	0.421698	0.00770181
promoter	rDPI_1217	YARS1	-0.0455679	0.553569	0.00770658
promoter	rDPI_39577	SGCB	0.0957586	-0.517587	0.0077085
promoter	rDPI_16889	MTMR10	0.545274	-0.0573867	0.0077095
promoter	rDPI_3772	POGK	0.733709	0.261469	0.00771408
promoter	rDPI_49749	DCTN6	0.21309	-0.424034	0.00771622
promoter	rDPI_4435	PRELP	0.590181	0.00904163	0.00772575
promoter	rDPI_39437	RPL9	0.761006	0.318487	0.0077499
promoter	rDPI_44267	TRIM38	0.53933	-0.0653212	0.00775117
promoter	rDPI_38142	LOC100507291	0.525682	-0.0841425	0.00776253
promoter	rDPI_37109	CCDC66	0.431024	-0.204082	0.00779555
promoter	rDPI_44782	CUTA	0.174127	-0.455772	0.0078197
promoter	rDPI_17526	CGNL1	0.477693	-0.146511	0.00784907
promoter	rDPI_21167	ZNF18	0.58864	0.00811901	0.00785833
promoter	rDPI_48834	WDR91	0.361461	-0.280844	0.00788622
promoter	rDPI_4895	TMEM63A	0.418476	-0.217737	0.00789006
promoter	rDPI_17426	TRPM7	0.550997	-0.0463153	0.00798017
promoter	rDPI_45176	SLC29A1	0.325359	-0.317195	0.00798076
promoter	rDPI_14192	SETDB2	0.361241	-0.279921	0.00800386
promoter	rDPI_44756	WDR46	0.454578	-0.173636	0.00800764
promoter	rDPI_28578	PELI1	0.707293	0.212755	0.00802451
promoter	rDPI_11205	FAM234B	-0.18029	0.448945	0.0080274
promoter	rDPI_43045	PCDHGA3	0.701349	0.201499	0.00802776
promoter	rDPI_13116	HVCN1	0.0101262	-0.575343	0.00803317
promoter	rDPI_50481	NIPAL2	0.606691	0.0383808	0.0080645
promoter	rDPI_50058	UBXN2B	0.715658	0.229547	0.00809236
promoter	rDPI_47078	TAX1BP1	0.393161	-0.244309	0.00810118
promoter	rDPI_599	EPHA2	0.560463	-0.0311844	0.00811851
promoter	rDPI_16136	ACYP1	0.527883	-0.0771306	0.00813885
promoter	rDPI_47273	SUGCT	0.313252	-0.327713	0.00814646
promoter	rDPI_38311	MBNL1-AS1	0.300924	-0.339707	0.00815741
promoter	rDPI_39825	RCHY1	0.509392	-0.101857	0.00817445
promoter	rDPI_23814	DSC2	0.563545	-0.0260178	0.00818243
promoter	rDPI_11434	OVCH1-AS1	0.525699	-0.0793651	0.00821343
promoter	rDPI_16935	NOP10	0.582917	0.00369046	0.00826536
promoter	rDPI_13795	RNF6	0.503228	-0.109053	0.00827225
promoter	rDPI_54427	HNRNPH2	0.394041	-0.241172	0.00832249
promoter	rDPI_54825	RTL8A	0.609113	0.0452081	0.00835402
promoter	rDPI_45396	COL19A1	0.455118	-0.169392	0.00836318
promoter	rDPI_50150	COPS5	0.470428	-0.150202	0.0083839
promoter	rDPI_26103	ZNF383	0.384796	-0.250767	0.00838973
promoter	rDPI_15811	JKAMP	0.351775	-0.286011	0.00841171
promoter	rDPI_40581	PABPC4L	0.530965	-0.0697497	0.00844465
promoter	rDPI_54141	MAGED2	0.271646	-0.364987	0.00845298
promoter	rDPI_26242	MED29	0.416935	-0.213862	0.00846046
promoter	rDPI_49260	FBXO25	0.704431	0.211648	0.00846493
promoter	rDPI_39411	TBC1D1	0.499046	-0.112559	0.00847232
promoter	rDPI_25335	IER2	0.540211	-0.0564641	0.00848176
promoter	rDPI_15986	EXD2	0.576533	-0.00369046	0.00848504
promoter	rDPI_27386	EPN1	-0.151012	-0.671295	0.00848747
promoter	rDPI_9139	NXF1	0.714117	0.230469	0.00849435
promoter	rDPI_899	LDLRAP1	0.35926	-0.277338	0.00849622
promoter	rDPI_45725	CEP57L1	0.496184	-0.116065	0.0084973
promoter	rDPI_30028	METTL8	0.600748	0.0335832	0.00850732
promoter	rDPI_49391	DLC1	0.658643	0.128982	0.00850843
promoter	rDPI_38190	TFDP2	0.328661	-0.308892	0.00851474
promoter	rDPI_51919	CTSL	0.558042	-0.0306308	0.00851685
promoter	rDPI_36776	ARIH2	0.562885	-0.0234344	0.0085309
promoter	rDPI_10642	SRPRA	0.415394	-0.214231	0.00860812
promoter	rDPI_8047	RRM1	0.706413	0.217184	0.00865122
promoter	rDPI_6510	CAMK2G	0.49002	-0.122523	0.00865723
promoter	rDPI_351	UBE4B	0.531626	-0.0664283	0.00868706
promoter	rDPI_47497	ZNF727	0.642609	0.103333	0.00869041
promoter	rDPI_22495	AKAP1	0.621441	0.0684581	0.00870245
promoter	rDPI_25719	ZNF506	0.592603	0.0232499	0.00874007
promoter	rDPI_12195	STAT6	0.789624	0.390266	0.00875002
promoter	rDPI_33270	MMP24OS	0.609994	0.0507438	0.00876979
promoter	rDPI_2363	ALG14	-0.646096	-0.11016	0.00878675
promoter	rDPI_3792	RCSD1	0.118433	-0.492123	0.00879797
promoter	rDPI_42727	UQCRQ	-0.0916371	0.512128	0.00883332
promoter	rDPI_45164	C6orf223	-0.156491	0.461861	0.00883774
promoter	rDPI_40613	RAB33B	0.558042	-0.0273094	0.00885443
promoter	rDPI_22781	PSMD12	0.427942	-0.197255	0.00885974
promoter	rDPI_1726	ZFYVE9	0.215292	-0.412409	0.00886235
promoter	rDPI_36178	RPL15	0.749779	0.305386	0.00888538
promoter	rDPI_4001	CEP350	0.658423	0.132488	0.00891111
promoter	rDPI_55032	MECP2	0.0363222	-0.551355	0.00892045
promoter	rDPI_52838	PHYHD1	0.495303	-0.113113	0.00892065
promoter	rDPI_21100	RANGRF	0.488919	-0.121416	0.00892114
promoter	rDPI_40095	PIGY-DT	-0.0409451	-0.602652	0.00895487
promoter	rDPI_389	FBXO44	0.562665	-0.0195594	0.0089599
promoter	rDPI_40526	SPATA5	0.247432	-0.382885	0.00897812
promoter	rDPI_11840	IGFBP6	0.128118	-0.483266	0.00898317
promoter	rDPI_10630	FEZ1	0.565526	-0.0151309	0.00898421
promoter	rDPI_22772	CEP112	0.50631	-0.0979817	0.00898428
promoter	rDPI_44540	MICB	0.50488	-0.0998636	0.0089865
promoter	rDPI_3175	S100A16	0.0647196	-0.530688	0.00899887
promoter	rDPI_41918	BDP1	0.426621	-0.19744	0.00900802
promoter	rDPI_9611	RPS6KB2	0.412753	-0.213493	0.00901564
promoter	rDPI_17773	KBTBD13	0.0917962	-0.510391	0.00906193
promoter	rDPI_24781	SAFB2	0.745817	0.298927	0.00908238
promoter	rDPI_7216	NOLC1	0.536468	-0.055726	0.00909848
promoter	rDPI_33294	RBM39	0.492662	-0.114773	0.00911089
promoter	rDPI_27456	ZNF549	0.262841	-0.36757	0.0091196
promoter	rDPI_26337	BLVRB	0.436087	-0.184892	0.00915533
promoter	rDPI_40980	CLCN3	0.208248	-0.416099	0.00916894
promoter	rDPI_27482	ZNF586	0.474611	-0.137285	0.00918408
promoter	rDPI_6514	VCL	0.383695	-0.244493	0.00920863
promoter	rDPI_3942	CACYBP	0.260199	-0.369231	0.00921702
promoter	rDPI_34264	RWDD2B	0.182932	-0.437135	0.00923374
promoter	rDPI_37354	ZNF717	0.314352	-0.316642	0.00927893
promoter	rDPI_42687	RAPGEF6	0.466906	-0.145958	0.0092966
promoter	rDPI_19747	RBL2	0.0942177	-0.506885	0.00930605
promoter	rDPI_2372	RWDD3	0.498825	-0.104809	0.00931575
promoter	rDPI_26896	NUCB1	0.316554	-0.314058	0.00932471
promoter	rDPI_13929	N4BP2L2	0.53823	-0.0511129	0.00932867
promoter	rDPI_22615	RPS6KB1	0.732609	0.274386	0.00933764
promoter	rDPI_3114	RFX5	0.145949	-0.46629	0.00938287
promoter	rDPI_21738	RPL19	0.677575	0.170684	0.0093907
promoter	rDPI_35429	ADSL	-0.666128	-0.150386	0.00939416
promoter	rDPI_12696	CDK17	0.817801	0.46057	0.00940584
promoter	rDPI_47015	FAM221A	0.276709	-0.35207	0.00942627
promoter	rDPI_33298	PHF20	0.529644	-0.0621843	0.00942677
promoter	rDPI_13240	PLBD2	0.611534	0.0594164	0.00943037
promoter	rDPI_27500	ZNF606	0.263942	-0.363695	0.00947465
promoter	rDPI_27463	ZNF530	0.274508	-0.353546	0.00950262
promoter	rDPI_27235	RPS9	0.716539	0.244309	0.00951139
promoter	rDPI_20762	PSMB6	0.266143	-0.361296	0.00951799
promoter	rDPI_37246	LRIG1	0.180731	-0.436582	0.00955625
promoter	rDPI_26134	ZNF573	0.532506	-0.0570176	0.0095586
promoter	rDPI_34695	USP18	0.530965	-0.0588629	0.0095915
promoter	rDPI_37094	CHDH	0.124816	-0.481421	0.00960445
promoter	rDPI_1063	PHACTR4	0.385236	-0.239326	0.00960996
promoter	rDPI_31902	IDH1	0.30951	-0.318671	0.00961915
promoter	rDPI_5362	ADSS2	0.610874	0.0601545	0.00962839
promoter	rDPI_14268	TDRD3	0.357939	-0.268666	0.00964423
promoter	rDPI_22248	SCRN2	0.477032	-0.129535	0.00970497
promoter	rDPI_39940	ENOPH1	-0.726665	-0.265713	0.00970759
promoter	rDPI_32106	TNS1	0.329762	-0.297451	0.00971842
promoter	rDPI_34806	TOP3B	0.285955	-0.340814	0.00973115
promoter	rDPI_21674	SYNRG	0.6855	0.188029	0.00973629
promoter	rDPI_10883	DYRK4	-0.19614	0.42182	0.00979318
promoter	rDPI_31837	CYP20A1	0.298283	-0.328267	0.0098046
promoter	rDPI_19501	SMG1P5	0.7511	0.315903	0.00981972
promoter	rDPI_23326	ARHGDIA	0.428162	-0.188398	0.009827
promoter	rDPI_40012	HSD17B11	0.595905	0.0387498	0.00986291
promoter	rDPI_23099	SNHG16	0.340549	-0.285088	0.00987192
promoter	rDPI_46690	ZFAND2A	0.194151	-0.422897	0.00987896
promoter	rDPI_43741	ZNF354C	0.480114	-0.123999	0.00988914
promoter	rDPI_13630	SFSWAP	0.204065	-0.414254	0.00989678
promoter	rDPI_40831	GUCY1A1	0.689462	0.197071	0.00994933
promoter	rDPI_26453	DEDD2	0.40879	-0.209803	0.00996356
promoter	rDPI_13729	MRPL57	-0.0268564	-0.587337	0.010009
promoter	rDPI_14781	ACIN1	0.409451	-0.208327	0.01005
promoter	rDPI_19151	MYH11	0.580055	0.016238	0.0100577
promoter	rDPI_7591	SEC23IP	0.47395	-0.130273	0.0100734
promoter	rDPI_39821	PARM1	0.479013	-0.123815	0.010075
promoter	rDPI_44658	ATF6B	0.60383	0.0529581	0.0100764
promoter	rDPI_8316	PDE3B	0.626063	0.0889401	0.0101235
promoter	rDPI_1961	MIER1	0.703771	0.225118	0.010129
promoter	rDPI_41945	ZNF366	-0.0614176	0.525706	0.0101295
promoter	rDPI_22455	UTP18	0.682198	0.185446	0.0101401
promoter	rDPI_28975	RETSAT	0.35882	-0.263683	0.0101405
promoter	rDPI_47672	GTF2IRD2B	0.416935	-0.198731	0.0101645
promoter	rDPI_3773	TADA1	0.162239	-0.447284	0.0102116
promoter	rDPI_49392	DLC1	0.204957	-0.411117	0.0102268
promoter	rDPI_9977	SYTL2	0.488259	-0.110529	0.0102388
promoter	rDPI_17286	HYPK	0.5554	-0.0184523	0.0102557
promoter	rDPI_995	SLC9A1	0.599427	0.0481605	0.0103214
promoter	rDPI_52453	MEGF9	0.602729	0.0533272	0.0103226
promoter	rDPI_25322	LYL1	0.47395	-0.127874	0.0103598
promoter	rDPI_5423	ZNF672	0.623642	0.0870949	0.0103722
promoter	rDPI_18896	ZNF205	0.285075	-0.336755	0.0103725
promoter	rDPI_54289	PIN4	-0.448194	0.159797	0.0103733
promoter	rDPI_11019	LRRC23	0.486058	-0.11219	0.0103813
promoter	rDPI_48970	GSTK1	0.29432	-0.327344	0.0104302
promoter	rDPI_30155	HNRNPA3	0.636529	0.108875	0.010446
promoter	rDPI_53875	MAOA	-0.100602	-0.631438	0.0104637
promoter	rDPI_45831	ZUP1	0.465365	-0.137654	0.0104864
promoter	rDPI_29631	CCNT2	0.493322	-0.101857	0.0104886
promoter	rDPI_22985	TMEM94	0.442251	-0.166071	0.0104891
promoter	rDPI_968	ARID1A	0.536909	-0.0426248	0.0105127
promoter	rDPI_23038	WBP2	0.701129	0.223273	0.0105166
promoter	rDPI_54033	TFE3	0.543733	-0.0328451	0.0105314
promoter	rDPI_28596	CEP68	0.517317	-0.0693807	0.0105478
promoter	rDPI_17149	OIP5-AS1	0.623422	0.0883865	0.0105716
promoter	rDPI_50184	TRAM1	0.647196	0.128059	0.0106045
promoter	rDPI_42612	LINC02201	0.0651599	-0.519986	0.0106191
promoter	rDPI_33228	MAP1LC3A	-0.223217	-0.700634	0.0106273
promoter	rDPI_44183	CAP2	0.175888	-0.433076	0.0106387
promoter	rDPI_50871	PTP4A3	0.193719	-0.417945	0.0106405
promoter	rDPI_10410	ATP5MG	0.527443	-0.0546188	0.0106561
promoter	rDPI_40702	SMARCA5	0.509832	-0.0784223	0.0106783
promoter	rDPI_25543	ABHD8	0.378192	-0.238404	0.0106854
promoter	rDPI_35865	SETD5	0.656222	0.144297	0.0107088
promoter	rDPI_38584	ZNF639	0.659964	0.150755	0.0107089
promoter	rDPI_38851	FGF12	0.518197	-0.0667973	0.0107172
promoter	rDPI_27640	CMPK2	0.309964	-0.309615	0.0107348
promoter	rDPI_53912	KRBOX4	0.6538	0.140422	0.0107438
promoter	rDPI_26839	ZSWIM9	0.353316	-0.264791	0.0107525
promoter	rDPI_54265	ZMYM3	0.385257	-0.229916	0.0107725
promoter	rDPI_33045	XRN2	0.711256	0.244493	0.0107904
promoter	rDPI_40260	UBE2D3	0.276269	-0.341921	0.0108235
promoter	rDPI_13440	LINC01089	0.299603	-0.319225	0.0108281
promoter	rDPI_7754	ZNF511	0.29454	-0.324022	0.0108531
promoter	rDPI_6002	HNRNPF	0.53933	-0.0361665	0.0108869
promoter	rDPI_52140	SEC61B	0.746037	0.313689	0.0108953
promoter	rDPI_28168	EIF2AK2	0.60471	0.0612617	0.0109107
promoter	rDPI_27034	PTOV1	0.673833	0.176773	0.0109258
promoter	rDPI_48752	MKLN1	0.542632	-0.0311844	0.0109267
promoter	rDPI_44379	NKAPL	0.507631	-0.0793449	0.0109302
promoter	rDPI_32683	SOX12	0.694525	0.214231	0.0109304
promoter	rDPI_23217	ENGASE	0.512694	-0.0721485	0.0109794
promoter	rDPI_27910	MAPRE3	0.511593	-0.0736247	0.0109803
promoter	rDPI_15338	MDP1	0.34363	-0.27291	0.011035
promoter	rDPI_36904	NAA80	0.325139	-0.291915	0.0110559
promoter	rDPI_47182	FKBP9	0.400865	-0.209987	0.0110816
promoter	rDPI_14685	METTL17	0.477472	-0.117172	0.0111347
promoter	rDPI_8840	FNBP4	0.460082	-0.138946	0.011154
promoter	rDPI_18385	PEX11A	0.432785	-0.17216	0.0111611
promoter	rDPI_47923	CYP51A1	0.52326	-0.056095	0.0111912
promoter	rDPI_37339	PDZRN3	-0.129439	-0.645093	0.0112288
promoter	rDPI_43610	CPEB4	-0.241048	0.371998	0.0112354
promoter	rDPI_9936	GAB2	0.714337	0.253719	0.0112386
promoter	rDPI_14722	METTL3	0.430584	-0.17419	0.0112391
promoter	rDPI_50611	EIF3E	0.774874	0.376427	0.0112486
promoter	rDPI_15453	SPTSSA	0.565967	0.00572021	0.0113352
promoter	rDPI_49346	GATA4	0.361902	-0.250951	0.0113801
promoter	rDPI_936	CEP85	0.30951	-0.305201	0.0114127
promoter	rDPI_51737	FAM122A	0.6527	0.143743	0.0114135
promoter	rDPI_40592	ELF2	0.329762	-0.28435	0.0114488
promoter	rDPI_17191	VPS39	0.443351	-0.157214	0.0114549
promoter	rDPI_53677	RBBP7	0.344071	-0.269219	0.0114807
promoter	rDPI_11812	KRT8	0.0294981	-0.540468	0.0115331
promoter	rDPI_6155	CISD1	0.24479	-0.366463	0.01155
promoter	rDPI_5053	NUP133	0.531185	-0.0418867	0.011614
promoter	rDPI_17765	ANKDD1A	0.563193	0.00387641	0.0116253
promoter	rDPI_12445	ZFC3H1	0.418256	-0.185815	0.0116312
promoter	rDPI_40518	KIAA1109	0.629586	0.106839	0.0116436
promoter	rDPI_659	UBR4	0.428823	-0.173083	0.0116681
promoter	rDPI_474	VPS13D	0.453258	-0.14319	0.0117108
promoter	rDPI_13405	ACADS	0.410111	-0.194487	0.0117415
promoter	rDPI_46508	TCP1	0.287056	-0.324576	0.0118259
promoter	rDPI_49484	PSD3	0.622541	0.0970591	0.0118701
promoter	rDPI_33700	RNF114	0.485617	-0.101119	0.0118706
promoter	rDPI_43128	TCERG1	0.556721	-0.00369046	0.0118727
promoter	rDPI_33942	GID8	0.564426	0.00774997	0.0119002
promoter	rDPI_11742	LIMA1	0.675153	0.186553	0.0119222
promoter	rDPI_1142	PEF1	0.577854	0.0280475	0.0119506
promoter	rDPI_33650	ZMYND8	0.47439	-0.114773	0.0119746
promoter	rDPI_11192	CREBL2	0.730848	0.290993	0.0119893
promoter	rDPI_21436	SDF2	0.109627	-0.478284	0.0119984
promoter	rDPI_13947	RFC3	0.44071	-0.156291	0.0120163
promoter	rDPI_10726	IGSF9B	0.746477	0.322362	0.0120195
promoter	rDPI_47407	RAMP3	0.665467	0.170315	0.0120328
promoter	rDPI_40603	NDUFC1	0.442251	-0.154261	0.0120388
promoter	rDPI_50914	MINCR	0.528324	-0.0426248	0.0120471
promoter	rDPI_36978	ABHD14B	0.704651	0.241172	0.0120478
promoter	rDPI_45052	CCND3	0.627604	0.106654	0.0120573
promoter	rDPI_18484	RGMA	0.464044	-0.127136	0.0120724
promoter	rDPI_22204	CDC27	0.530085	-0.039857	0.0120915
promoter	rDPI_9752	LRTOMT	-0.0101262	-0.56501	0.0121059
promoter	rDPI_28473	VRK2	0.165321	-0.432522	0.0121316
promoter	rDPI_53263	MRPL41	0.40813	-0.193934	0.0121399
promoter	rDPI_29632	RAB3GAP1	0.357499	-0.250213	0.0121578
promoter	rDPI_11412	MED21	0.579175	0.031738	0.0121831
promoter	rDPI_26091	ZNF345	0.112269	-0.475147	0.0121872
promoter	rDPI_10845	CRACR2A	0.000880539	-0.556891	0.0122211
promoter	rDPI_51597	TLN1	0.755282	0.341737	0.0122365
promoter	rDPI_20598	MYO1C	0.512694	-0.0625533	0.0122462
promoter	rDPI_1451	ZNF684	0.160698	-0.435659	0.0122529
promoter	rDPI_9502	BANF1	-0.772887	-0.3787	0.0122593
promoter	rDPI_19153	CEP20	0.652039	0.14891	0.0122738
promoter	rDPI_51625	HRCT1	0.0682418	-0.508176	0.012301
promoter	rDPI_13679	MPHOSPH8	0.477032	-0.108869	0.0123258
promoter	rDPI_18112	SCAPER	0.496184	-0.0835889	0.0123844
promoter	rDPI_48836	CNOT4	0.086513	-0.493784	0.012417
promoter	rDPI_14027	KBTBD6	0.0711035	-0.505409	0.0124189
promoter	rDPI_51602	CREB3	0.238406	-0.366647	0.0124385
promoter	rDPI_46025	PTPRK	0.708834	0.251689	0.0124394
promoter	rDPI_18389	AP3S2	0.480554	-0.103517	0.0124432
promoter	rDPI_34551	SUMO3	0.509063	-0.0660275	0.012444
promoter	rDPI_23177	CYTH1	0.497064	-0.0817437	0.0124807
promoter	rDPI_29575	CCDC115	0.379292	-0.224196	0.0124841
promoter	rDPI_2550	GSTM1	0.431851	-0.163559	0.0124969
promoter	rDPI_27408	ZNF667-AS1	0.460302	-0.128613	0.0125233
promoter	rDPI_33995	ARFRP1	0.425741	-0.170499	0.0125457
promoter	rDPI_32794	ITPA	-0.184253	0.413885	0.0125727
promoter	rDPI_38683	ABCF3	0.058776	-0.513712	0.0125824
promoter	rDPI_14696	ARHGEF40	0.530305	-0.035982	0.0125876
promoter	rDPI_41469	ZFR	0.514015	-0.0583093	0.0125905
promoter	rDPI_12875	TCP11L2	-0.0715438	-0.603206	0.0125963
promoter	rDPI_26204	HNRNPL	0.189316	-0.409272	0.0126162
promoter	rDPI_49029	ZNF212	-0.138465	0.451712	0.0126381
promoter	rDPI_41878	PIK3R1	0.124156	-0.462784	0.012718
promoter	rDPI_42948	STING1	0.673833	0.189874	0.0127357
promoter	rDPI_36594	FYCO1	0.204725	-0.395064	0.0127468
promoter	rDPI_51032	MAF1	0.218814	-0.382516	0.0127514
promoter	rDPI_51523	PIGO	0.466245	-0.119571	0.0127523
promoter	rDPI_42314	ARSK	0.360801	-0.242486	0.0127792
promoter	rDPI_38025	UBA5	0.000660404	-0.554123	0.0128147
promoter	rDPI_11187	BORCS5	0.53911	-0.0219582	0.0128305
promoter	rDPI_9019	TMEM258	0.361902	-0.240803	0.012854
promoter	rDPI_9545	LOC101928069	-0.0182712	-0.566855	0.0128677
promoter	rDPI_21318	SHMT1	-0.0583357	-0.593426	0.0128774
promoter	rDPI_3406	DAP3	0.559265	0.0073816	0.0128998
promoter	rDPI_21524	CRLF3	0.602069	0.071964	0.0129119
promoter	rDPI_3913	PRDX6-AS1	0.26196	-0.341737	0.0129159
promoter	rDPI_45120	CUL9	0.426401	-0.167178	0.0129185
promoter	rDPI_13776	SPATA13	0.309069	-0.295606	0.0129239
promoter	rDPI_3317	ADAR	0.493762	-0.0828509	0.0129455
promoter	rDPI_54519	TCEAL1	0.0290578	-0.533456	0.0129506
promoter	rDPI_6781	RPP30	0.467786	-0.11625	0.0129534
promoter	rDPI_52488	GSN	0.0858526	-0.4912	0.0129976
promoter	rDPI_8292	BTBD10	-0.716539	-0.269957	0.0130017
promoter	rDPI_18927	CLUAP1	0.667449	0.180464	0.0130034
promoter	rDPI_50153	CSPP1	0.540211	-0.0190059	0.0130332
promoter	rDPI_37503	CEP97	0.484957	-0.0931841	0.0131151
promoter	rDPI_15588	KLHDC1	0.514015	-0.0546188	0.0131234
promoter	rDPI_1702	TTC39A	0.0656002	-0.505593	0.0131759
promoter	rDPI_51361	KLHL9	0.106986	-0.473855	0.0131847
promoter	rDPI_10933	MRPL51	0.361021	-0.239326	0.01323
promoter	rDPI_21285	SREBF1	-0.442911	-0.799723	0.0132482
promoter	rDPI_17251	TMEM62	0.622761	0.107208	0.0132651
promoter	rDPI_12453	TMEM19	0.0110091	-0.544658	0.0132826
promoter	rDPI_16422	DDX24	0.68594	0.215154	0.0132953
promoter	rDPI_42080	CMYA5	0.62122	0.104994	0.0133057
promoter	rDPI_8684	AMBRA1	0.6199	0.102964	0.0133199
promoter	rDPI_26127	ZNF571	0.199222	-0.39654	0.0133278
promoter	rDPI_26650	RTN2	0.222556	-0.375689	0.0133404
promoter	rDPI_30041	HAT1	0.236205	-0.363141	0.0133588
promoter	rDPI_42341	CAST	0.663046	0.175297	0.0133807
promoter	rDPI_55093	SLC10A3	0.527883	-0.0335832	0.0134258
promoter	rDPI_12807	GLT8D2	0.724464	0.287856	0.0134337
promoter	rDPI_2985	VPS45	0.09796	-0.479575	0.0134398
promoter	rDPI_16363	TRIP11	0.663486	0.176589	0.0134625
promoter	rDPI_27995	LINC01460	-0.152243	0.435812	0.0134732
promoter	rDPI_12044	MYL6B	0.1312	-0.45282	0.0135157
promoter	rDPI_1181	EIF3I	0.360801	-0.237666	0.0135304
promoter	rDPI_54153	FAM104B	0.649618	0.153339	0.0135342
promoter	rDPI_49808	PLPBP	0.606912	0.0837735	0.0135391
promoter	rDPI_40384	LARP7	0.606471	0.0832199	0.0135601
promoter	rDPI_34903	SNRPD3	0.496404	-0.0751009	0.0135816
promoter	rDPI_42541	PGGT1B	0.0383035	-0.523492	0.0136278
promoter	rDPI_42874	FAM13B	0.308189	-0.2921	0.0136364
promoter	rDPI_43915	NQO2	0.291899	-0.308338	0.0136447
promoter	rDPI_38385	MLF1	-0.370267	-0.764848	0.0136883
promoter	rDPI_29217	MRPL30	0.509832	-0.0562795	0.0137218
promoter	rDPI_50403	INTS8	0.356839	-0.240064	0.0138352
promoter	rDPI_5411	ZNF669	0.565306	0.0225118	0.0138381
promoter	rDPI_39019	ZNF721	0.60383	0.0810056	0.0138554
promoter	rDPI_40919	TRIM61	0.323158	-0.275493	0.0138557
promoter	rDPI_20915	DVL2	0.266803	-0.331219	0.0139099
promoter	rDPI_12272	ATP23	0.515776	-0.0468689	0.0139323
promoter	rDPI_46948	SNX13	0.141987	-0.441748	0.0139504
promoter	rDPI_22908	RPL38	-0.596009	-0.0696931	0.0139854
promoter	rDPI_15892	SYNE2	-0.227399	-0.690301	0.013992
promoter	rDPI_36732	TMA7	0.26152	-0.335463	0.0140502
promoter	rDPI_29787	BAZ2B	0.396022	-0.195225	0.0140539
promoter	rDPI_48119	TRIM4	0.683078	0.214785	0.0140549
promoter	rDPI_34338	GART	-0.639051	-0.13913	0.0140783
promoter	rDPI_52480	GSN	0.60405	0.0828509	0.0140895
promoter	rDPI_5396	TFB2M	0.396463	-0.194487	0.0140921
promoter	rDPI_18205	MTHFS	0.218594	-0.374951	0.0141064
promoter	rDPI_46968	SP4	-0.217493	-0.684396	0.0141121
promoter	rDPI_11734	COX14	0.389859	-0.201868	0.0141122
promoter	rDPI_21184	ELAC2	0.599867	0.0765771	0.0141279
promoter	rDPI_44082	TMEM14B	0.215072	-0.377903	0.0141464
promoter	rDPI_8863	SLC43A3	0.708834	0.262576	0.014167
promoter	rDPI_39570	OCIAD2	0.241928	-0.353177	0.0141784
promoter	rDPI_42793	SAR1B	0.21199	-0.380302	0.0142136
promoter	rDPI_371	TARDBP	0.327561	-0.268481	0.0142683
promoter	rDPI_5586	USP6NL	0.566847	0.0276785	0.0142904
promoter	rDPI_36809	QARS1	0.125037	-0.453742	0.0143034
promoter	rDPI_675	MICOS10	0.388978	-0.201684	0.0143057
promoter	rDPI_51663	POLR1E	0.706853	0.259808	0.0143246
promoter	rDPI_46708	PSMG3-AS1	0.250073	-0.344689	0.0143354
promoter	rDPI_43965	LYRM4-AS1	0.624302	0.116619	0.0143389
promoter	rDPI_29528	IWS1	0.185133	-0.402998	0.0143955
promoter	rDPI_11354	LDHB	0.0453478	-0.514635	0.0144152
promoter	rDPI_8319	CYP2R1	0.281332	-0.314243	0.0144181
promoter	rDPI_9552	CTSF	0.439829	-0.141345	0.0144273
promoter	rDPI_48112	ZNF655	0.553859	0.00996424	0.0144832
promoter	rDPI_14080	TSC22D1	0.364103	-0.228255	0.014485
promoter	rDPI_54556	RBM41	0.419797	-0.164964	0.014489
promoter	rDPI_1166	KPNA6	0.395362	-0.192827	0.0145723
promoter	rDPI_40946	PALLD	-0.019592	-0.560027	0.0145936
promoter	rDPI_45544	SMIM8	0.447094	-0.131196	0.0146355
promoter	rDPI_22738	DDX5	0.667229	0.190428	0.0146466
promoter	rDPI_12978	IFT81	0.182272	-0.404105	0.0146583
promoter	rDPI_14074	LACC1	0.640152	0.144666	0.01468
promoter	rDPI_31702	MOB4	0.699809	0.249291	0.014757
promoter	rDPI_43587	ATP6V0E1	0.631347	0.130642	0.0147586
promoter	rDPI_9708	CCND1	0.63773	0.14116	0.0147633
promoter	rDPI_10129	PDGFD	0.340989	-0.251505	0.0147633
promoter	rDPI_29715	NMI	0.425961	-0.155979	0.0147658
promoter	rDPI_9970	TMEM126B	0.411212	-0.173267	0.0147842
promoter	rDPI_52052	FANCC	0.356178	-0.235082	0.0147903
promoter	rDPI_15791	KIAA0586	0.503889	-0.0573867	0.0148082
promoter	rDPI_35304	EIF3L	0.533387	-0.0169761	0.0148261
promoter	rDPI_47995	PPP1R9A	0.367405	-0.222535	0.014843
promoter	rDPI_55156	TMLHE	0.420678	-0.161458	0.0148991
promoter	rDPI_21636	TAF15	0.403947	-0.181017	0.0149003
promoter	rDPI_37052	SMIM4	0.120854	-0.454111	0.0149128
promoter	rDPI_42924	MATR3	-0.223657	-0.685134	0.0149276
promoter	rDPI_39545	NFXL1	0.557822	0.0184523	0.0149299
promoter	rDPI_35027	SF3A1	0.439829	-0.138208	0.0149453
promoter	rDPI_50680	COL14A1	0.650058	0.162934	0.0149645
promoter	rDPI_50720	NTAQ1	0.621441	0.11625	0.0150353
promoter	rDPI_13765	TNFRSF19	0.21177	-0.376058	0.0150497
promoter	rDPI_16647	ATP5MPL	0.399765	-0.184708	0.0150932
promoter	rDPI_21317	SMCR8	0.305107	-0.286749	0.0151032
promoter	rDPI_36360	OXSR1	0.710155	0.271249	0.0152492
promoter	rDPI_54779	RAP2C-AS1	0.0471088	-0.509284	0.0153128
promoter	rDPI_36980	ABHD14A-ACY1	0.100381	-0.468504	0.0153183
promoter	rDPI_35523	XRCC6	0.202524	-0.382885	0.0153306
promoter	rDPI_15778	PSMA3	0.398884	-0.183969	0.0153963
promoter	rDPI_2915	BCL9	0.646096	0.159059	0.0154408
promoter	rDPI_42736	HSPA4	0.157176	-0.421451	0.0154749
promoter	rDPI_47530	GUSB	0.584898	0.0619997	0.0155001
promoter	rDPI_20919	PHF23	-0.73453	-0.319225	0.0155144
promoter	rDPI_41961	BTF3	0.670971	0.202053	0.0155275
promoter	rDPI_25268	DNASE2	0.206927	-0.377719	0.0155753
promoter	rDPI_26527	ZNF234	0.584238	0.0614462	0.0155763
promoter	rDPI_44988	GLO1	0.654681	0.174374	0.0155893
promoter	rDPI_40578	C4orf33	0.346712	-0.240618	0.0156133
promoter	rDPI_33861	PRELID3B	0.511153	-0.0426248	0.0156461
promoter	rDPI_17594	GTF2A2	0.646536	0.161089	0.0156668
promoter	rDPI_32973	SNX5	0.425741	-0.15094	0.0156727
promoter	rDPI_12025	RPS26	0.296301	-0.292469	0.0156831
promoter	rDPI_45275	TRAM2	0.394702	-0.187106	0.0156883
promoter	rDPI_39042	SLC49A3	0.677575	0.2146	0.0156996
promoter	rDPI_50051	FAM110B	0.666568	0.19541	0.0157068
promoter	rDPI_7393	BBIP1	0.511153	-0.0418867	0.0157731
promoter	rDPI_3788	CREG1	0.698268	0.252243	0.0157897
promoter	rDPI_39004	RPL35A	0.596345	0.0811901	0.0157928
promoter	rDPI_43735	ZNF354B	0.496844	-0.0608926	0.0157948
promoter	rDPI_31729	CLK1	0.180951	-0.399492	0.015806
promoter	rDPI_11406	FGFR1OP2	0.611314	0.104625	0.0158063
promoter	rDPI_5344	FH	0.545714	0.00627378	0.0158106
promoter	rDPI_1594	MMACHC	0.230921	-0.354653	0.0158217
promoter	rDPI_47507	ZNF107	0.385236	-0.197071	0.0158291
promoter	rDPI_28623	WDR92	0.255797	-0.331219	0.0158419
promoter	rDPI_110	CCNL2	0.532506	-0.011994	0.0158716
promoter	rDPI_49660	SDAD1P1	0.660845	0.186553	0.0158859
promoter	rDPI_11477	FGD4	0.312371	-0.274939	0.0159169
promoter	rDPI_2392	AGL	0.414514	-0.162749	0.0159362
promoter	rDPI_40833	GUCY1A1	0.777296	0.408165	0.0159648
promoter	rDPI_12079	ANKRD52	0.373349	-0.209618	0.0159673
promoter	rDPI_51364	MTAP	0.370927	-0.212202	0.015986
promoter	rDPI_36440	RPL14	0.740754	0.334171	0.0160459
promoter	rDPI_7630	HTRA1	0.760346	0.373475	0.0160549
promoter	rDPI_37557	PHLDB2	0.0250954	0.557813	0.0160596
promoter	rDPI_13709	EEF1AKMT1	0.24567	-0.339338	0.0161312
promoter	rDPI_11754	DIP2B	-0.419357	0.155368	0.0162363
promoter	rDPI_4712	ANGEL2	0.158057	-0.416838	0.0162888
promoter	rDPI_51407	NDUFB6	0.369606	-0.212017	0.0162892
promoter	rDPI_37124	APPL1	0.679776	0.221797	0.0163063
promoter	rDPI_39196	MAN2B2	0.302905	-0.282505	0.0163126
promoter	rDPI_9363	DPF2	0.467346	-0.0961365	0.0163151
promoter	rDPI_8601	ALKBH3	0.528103	-0.0151309	0.016397
promoter	rDPI_7815	RNH1	0.394482	-0.183416	0.0164027
promoter	rDPI_11691	LOC105369760	0.567468	0.0411486	0.0164032
promoter	rDPI_47294	URGCP	0.0785881	-0.480498	0.0164437
promoter	rDPI_3898	VAMP4	0.572791	0.0492677	0.0164478
promoter	rDPI_22795	C17orf58	-0.458981	0.105926	0.0164504
promoter	rDPI_27384	U2AF2	0.635969	0.147987	0.0164594
promoter	rDPI_7954	H19	0.162459	-0.412224	0.0164763
promoter	rDPI_4468	PPP1R15B	0.156296	-0.417391	0.0164913
promoter	rDPI_15720	SOCS4	0.6527	0.176035	0.0164942
promoter	rDPI_7842	LOC171391	0.48958	-0.0664283	0.0165061
promoter	rDPI_29800	CD302	0.683739	0.230285	0.016582
promoter	rDPI_21791	PNMT	-0.0497505	-0.572575	0.0165924
promoter	rDPI_4488	RBBP5	0.343851	-0.238219	0.0166313
promoter	rDPI_38285	EIF2A	0.457	-0.107392	0.0166345
promoter	rDPI_42800	DDX46	0.558042	0.0287856	0.0166579
promoter	rDPI_7238	ACTR1A	0.533387	-0.00608926	0.0167005
promoter	rDPI_14018	ELF1	0.565526	0.040226	0.0167518
promoter	rDPI_29677	ZEB2	0.578294	0.0592319	0.0167661
promoter	rDPI_52884	ASB6	0.385456	-0.191719	0.0167699
promoter	rDPI_18490	LINC01197	0.474831	-0.0835889	0.0168611
promoter	rDPI_18256	SNHG21	0.400645	-0.173636	0.0169055
promoter	rDPI_25891	ZNF599	0.173026	-0.401153	0.0169099
promoter	rDPI_5352	CEP170	0.40769	-0.165333	0.0169292
promoter	rDPI_46822	FAM220A	0.560903	0.0345058	0.0169422
promoter	rDPI_26889	PPP1R15A	0.393601	-0.181386	0.0169718
promoter	rDPI_52820	ZER1	0.0854123	-0.472933	0.0169732
promoter	rDPI_29151	KANSL3	0.403067	-0.170315	0.0170038
promoter	rDPI_236	RNF207	0.409231	-0.163118	0.0170076
promoter	rDPI_7115	CHUK	0.0715438	-0.48345	0.0170319
promoter	rDPI_2592	PIFO	0.182492	-0.392296	0.0170455
promoter	rDPI_18172	IREB2	0.204065	-0.373106	0.017059
promoter	rDPI_11035	C12orf57	0.449956	-0.113851	0.01706
promoter	rDPI_35414	RPS19BP1	0.563105	0.0383808	0.0170642
promoter	rDPI_18804	SNHG19	0.29344	-0.288225	0.0170666
promoter	rDPI_1172	TXLNA	0.575212	0.0562795	0.0170697
promoter	rDPI_47868	SLC25A40	0.381934	-0.194118	0.0170704
promoter	rDPI_26845	EMP3	0.292999	-0.288225	0.0171558
promoter	rDPI_41345	ATPSCKMT	0.395142	-0.178618	0.0171632
promoter	rDPI_7744	INPP5A	0.699588	0.261838	0.0171671
promoter	rDPI_11558	PUS7L	0.366084	-0.21091	0.0172407
promoter	rDPI_14309	COMMD6	0.689242	0.24357	0.0172543
promoter	rDPI_26080	ZNF461	0.455679	-0.105363	0.0173187
promoter	rDPI_46372	SYNE1	0.363443	-0.213309	0.0173408
promoter	rDPI_28209	GALM	0.394482	-0.178249	0.0173804
promoter	rDPI_10097	PGR	0.419008	-0.149307	0.0174464
promoter	rDPI_17924	THSD4	0.297842	-0.281398	0.0175541
promoter	rDPI_10633	PUS3	0.264382	-0.314427	0.0175702
promoter	rDPI_1196	BSDC1	0.0151893	-0.523307	0.0176063
promoter	rDPI_35463	L3MBTL2	0.370487	-0.204082	0.0176249
promoter	rDPI_42535	MCC	0.639492	0.159981	0.0176308
promoter	rDPI_23282	FAAP100	0.617698	0.124738	0.0176424
promoter	rDPI_508	PRDM2	0.684839	0.237666	0.0176445
promoter	rDPI_5839	ACBD5	0.534707	0.000922615	0.01766
promoter	rDPI_33903	OSBPL2	-0.16312	0.406135	0.0177033
promoter	rDPI_9895	EMSY	0.116671	-0.444885	0.0177137
promoter	rDPI_24958	HNRNPM	0.567067	0.047976	0.0177775
promoter	rDPI_35525	XRCC6	-0.747358	-0.355576	0.0177863
promoter	rDPI_47220	HERPUD2	0.6855	0.239695	0.017818
promoter	rDPI_1955	TCTEX1D1	0.0239947	0.550298	0.0178478
promoter	rDPI_47278	C7orf25	0.185574	-0.385838	0.0178786
promoter	rDPI_19104	SNX29	0.431464	-0.132119	0.0178901
promoter	rDPI_10027	SMCO4	0.540651	0.0107023	0.017932
promoter	rDPI_22944	ATP5PD	0.662165	0.199654	0.0179483
promoter	rDPI_47528	VKORC1L1	0.517537	-0.0210356	0.0180024
promoter	rDPI_27010	IRF3	0.34341	-0.231761	0.0180034
promoter	rDPI_26171	PSMD8	-0.496184	0.0494522	0.0180577
promoter	rDPI_17078	SRP14	0.544173	0.0164226	0.0180736
promoter	rDPI_17890	GLCE	0.450396	-0.107946	0.0180884
promoter	rDPI_32259	SPEG	0.392941	-0.176035	0.0181672
promoter	rDPI_36327	LRRFIP2	0.321177	-0.254457	0.0181729
promoter	rDPI_26367	C19orf54	0.213311	-0.359266	0.0182611
promoter	rDPI_34439	PSMG1	0.253815	0.692146	0.0182815
promoter	rDPI_31740	ORC2	0.632667	0.152232	0.0183108
promoter	rDPI_10767	WNK1	0.572571	0.0588629	0.0183146
promoter	rDPI_2237	KYAT3	0.492442	-0.0529581	0.0183386
promoter	rDPI_42919	SIL1	0.252274	-0.321993	0.0184524
promoter	rDPI_54843	SLC9A6	0.521499	-0.0132857	0.0184575
promoter	rDPI_54238	EDA	0.692104	0.254642	0.0184716
promoter	rDPI_18099	UBE2Q2	0.351555	-0.22069	0.0184744
promoter	rDPI_19595	ZNF646	0.589961	0.0859877	0.0185125
promoter	rDPI_40307	SGMS2	0.510992	-0.0273094	0.018516
promoter	rDPI_1459	NFYC	0.152994	-0.411302	0.0185173
promoter	rDPI_41578	AIG1P1	0.313269	-0.261032	0.0185174
promoter	rDPI_13623	RAN	0.518197	-0.0173452	0.0185496
promoter	rDPI_10816	TULP3	0.308629	-0.265529	0.018578
promoter	rDPI_1826	DAB1	0.349153	-0.222616	0.0186159
promoter	rDPI_24069	ELAC1	0.379733	-0.188767	0.018632
promoter	rDPI_2805	PHGDH	0.249413	-0.323838	0.01865
promoter	rDPI_9024	FADS1	0.262401	-0.31129	0.0186613
promoter	rDPI_50779	NSMCE2	0.507851	-0.0308153	0.0186621
promoter	rDPI_49852	TACC1	0.568388	0.0544343	0.018663
promoter	rDPI_50654	UTP23	0.0763868	-0.473117	0.0186701
promoter	rDPI_8351	KCNJ11	0.57169	0.0594164	0.0186843
promoter	rDPI_8895	MED19	-0.191517	-0.655241	0.0186896
promoter	rDPI_27442	ZNF547	0.57235	0.0605236	0.0187103
promoter	rDPI_10354	ZPR1	0.741854	0.348933	0.0187206
promoter	rDPI_33851	CTSZ	-0.468957	0.0812199	0.0187668
promoter	rDPI_27466	ZNF134	0.305767	-0.267374	0.0188128
promoter	rDPI_3118	PSMB4	-0.274948	-0.702295	0.0188728
promoter	rDPI_8580	COMMD9	-0.349794	0.22069	0.0188759
promoter	rDPI_2634	CTTNBP2NL	0.792045	0.452081	0.0188775
promoter	rDPI_46429	GTF2H5	0.520179	-0.0129166	0.0188937
promoter	rDPI_7269	BORCS7	0.455899	-0.0970591	0.0188965
promoter	rDPI_7769	SYCE1	0.0538812	0.567006	0.0189618
promoter	rDPI_10929	TAPBPL	0.351555	-0.218106	0.0190188
promoter	rDPI_40315	RPL34	0.508291	-0.0284166	0.0190263
promoter	rDPI_22427	LUC7L3	0.218814	-0.350778	0.0190479
promoter	rDPI_50568	LOC105369147	0.00794225	0.534465	0.0191106
promoter	rDPI_27073	EMC10	0.110728	-0.443962	0.0191298
promoter	rDPI_50459	LAPTM4B	0.447314	-0.10647	0.0191558
promoter	rDPI_33601	ZSWIM3	0.0372028	-0.50098	0.0192332
promoter	rDPI_55178	DDX3Y	0.191704	-0.374397	0.0192744
promoter	rDPI_34383	SETD4	0.545494	0.024357	0.0192849
promoter	rDPI_531	DDI2	0.479894	-0.0645831	0.0192978
promoter	rDPI_16648	TDRD9	0.438248	-0.116862	0.0193105
promoter	rDPI_54228	PJA1	0.446213	-0.107023	0.019323
promoter	rDPI_44719	BRD2	0.55474	0.0378272	0.0193313
promoter	rDPI_26181	EIF3K	0.410111	-0.150017	0.019425
promoter	rDPI_36871	RBM6	0.618139	0.134517	0.0194776
promoter	rDPI_6452	ANXA7	0.648737	0.184523	0.0195181
promoter	rDPI_8834	CELF1	0.452817	-0.0972436	0.0196564
promoter	rDPI_23969	C18orf25	0.00638391	-0.5222	0.0196661
promoter	rDPI_15284	DHRS4	0.50653	-0.0276785	0.0196677
promoter	rDPI_29776	TANC1	0.362782	-0.202791	0.0196696
promoter	rDPI_14445	NALCN	0.565526	0.0551724	0.0196769
promoter	rDPI_37058	PBRM1	0.626504	0.14891	0.0196933
promoter	rDPI_19910	MMP15	0.452377	-0.0976127	0.0196943
promoter	rDPI_47488	PHKG1	0.14749	-0.411117	0.0197112
promoter	rDPI_3316	ADAR	0.433886	-0.120125	0.0197422
promoter	rDPI_26083	LINC01534	0.476372	-0.0667973	0.019785
promoter	rDPI_16137	ZC2HC1C	-0.022894	-0.542682	0.0198114
promoter	rDPI_8722	DDB2	0.721162	0.314058	0.0198182
promoter	rDPI_46082	TCF21	0.398444	-0.161642	0.0198496
promoter	rDPI_7523	TRUB1	0.497285	-0.0391189	0.019858
promoter	rDPI_14354	OBI1	0.278471	-0.29007	0.0198927
promoter	rDPI_11517	KIF21A	0.614396	0.130642	0.0199153
promoter	rDPI_49824	ASH2L	-0.0827707	-0.583277	0.0199374
promoter	rDPI_37358	ROBO1	0.486718	-0.0524045	0.0199908
promoter	rDPI_33319	AAR2	0.654901	0.197071	0.0200021
promoter	rDPI_25109	LOC105372273	0.480334	-0.0605236	0.0200305
promoter	rDPI_25736	ZNF85	0.379733	-0.182124	0.0200497
promoter	rDPI_44565	APOM	0.326531	-0.240064	0.0200801
promoter	rDPI_19197	GPRC5B	0.222336	-0.343028	0.0201121
promoter	rDPI_1114	SNRNP40	0.35926	-0.204636	0.0201186
promoter	rDPI_46000	NCOA7	0.561784	0.051851	0.0201323
promoter	rDPI_12617	EEA1	0.7183	0.310552	0.0202546
promoter	rDPI_9206	STIP1	0.365644	-0.196886	0.020274
promoter	rDPI_19173	COQ7	0.283534	-0.283243	0.0203067
promoter	rDPI_1195	TSSK3	0.487819	-0.0494522	0.0203149
promoter	rDPI_54768	ENOX2	0.233343	-0.331588	0.020391
promoter	rDPI_45367	ZNF451	0.764748	0.401338	0.0203958
promoter	rDPI_5399	CNST	0.586439	0.0896782	0.0203979
promoter	rDPI_9789	STARD10	0.110288	-0.439349	0.020428
promoter	rDPI_12848	APPL2	-0.231582	0.333064	0.0204347
promoter	rDPI_35407	TAB1	0.421558	-0.131749	0.0204403
promoter	rDPI_26088	ZNF790	0.554079	0.0422558	0.0204701
promoter	rDPI_50339	C8orf88	0.354417	-0.208327	0.0204831
promoter	rDPI_5482	PFKP	-0.256471	0.309076	0.0204954
promoter	rDPI_31970	FN1	0.0176301	0.536637	0.020509
promoter	rDPI_35063	SELENOM	0.534047	0.0140238	0.020514
promoter	rDPI_3997	TOR1AIP1	0.476372	-0.0632914	0.0205376
promoter	rDPI_50569	FZD6	0.601188	0.112928	0.0205512
promoter	rDPI_38949	SENP5	0.600087	0.111267	0.0205599
promoter	rDPI_4570	EIF2D	0.477252	-0.0619997	0.0205717
promoter	rDPI_3667	PPOX	0.35992	-0.201868	0.0205773
promoter	rDPI_10814	ITFG2-AS1	0.37599	-0.183785	0.0206198
promoter	rDPI_41556	WDR70	0.689902	0.260362	0.0206211
promoter	rDPI_1994	SRSF11	0.234664	-0.329189	0.0206724
promoter	rDPI_46990	KLHL7	-0.0640592	-0.568331	0.020701
promoter	rDPI_7210	LDB1	0.672292	0.229916	0.0207216
promoter	rDPI_19134	NTAN1	0.270326	-0.294499	0.0207463
promoter	rDPI_50093	CYP7B1	0.627384	0.155553	0.0208419
promoter	rDPI_1660	EFCAB14	0.626063	0.153523	0.020863
promoter	rDPI_21405	IFT20	0.518858	-0.00535117	0.0208723
promoter	rDPI_1069	RCC1	-0.556501	-0.0477915	0.0209175
promoter	rDPI_32997	SMIM26	0.338127	-0.224011	0.020933
promoter	rDPI_29987	FASTKD1	0.610434	0.129166	0.0209619
promoter	rDPI_44300	H2AC7	0.0248752	-0.504117	0.0209685
promoter	rDPI_44172	RBM24	-0.0352602	-0.547546	0.0209896
promoter	rDPI_19032	TMEM186	0.419577	-0.131565	0.0210084
promoter	rDPI_24566	ZNF554	0.589741	0.0976127	0.0210452
promoter	rDPI_17384	SHC4	0.313912	-0.248922	0.0210902
promoter	rDPI_48965	EPHB6	0.157617	-0.397094	0.0210917
promoter	rDPI_50203	SBSPON	0.421118	-0.129351	0.021093
promoter	rDPI_8999	TMEM138	0.219695	-0.341183	0.021174
promoter	rDPI_45805	COL10A1	0.217933	-0.342659	0.0212137
promoter	rDPI_27597	PXDN	-0.745156	-0.365725	0.0212343
promoter	rDPI_33901	MTG2	0.141547	-0.410195	0.0212672
promoter	rDPI_50487	STK3	0.795787	0.469242	0.0213634
promoter	rDPI_48838	NUP205	0.449956	-0.0929996	0.0213649
promoter	rDPI_9771	INPPL1	0.658203	0.20888	0.0214273
promoter	rDPI_37186	FHIT	0.517757	-0.00424403	0.0214548
promoter	rDPI_50949	GFUS	0.324699	-0.235636	0.0215623
promoter	rDPI_47257	YAE1	0.172586	-0.382147	0.0215934
promoter	rDPI_15875	SGPP1	0.143088	-0.407427	0.0216624
promoter	rDPI_34576	LINC00205	0.48914	-0.0415177	0.0216916
promoter	rDPI_48732	ZC3HC1	0.654461	0.203898	0.0217382
promoter	rDPI_15822	DHRS7	0.60449	0.123446	0.0217729
promoter	rDPI_36071	RBSN	0.363222	-0.192827	0.02183
promoter	rDPI_5456	IDI1	0.417816	-0.129904	0.021871
promoter	rDPI_49827	LSM1	-0.00858526	-0.525706	0.021889
promoter	rDPI_27871	ASXL2	0.706853	0.296159	0.0218996
promoter	rDPI_52847	SH3GLB2	0.75198	0.381963	0.0219961
promoter	rDPI_22975	SLC25A19	-0.331303	0.226779	0.0220099
promoter	rDPI_16291	FOXN3	0.648077	0.194487	0.0220337
promoter	rDPI_43441	SOX30	0.452693	-0.0866099	0.0220498
promoter	rDPI_23770	SS18	0.707513	0.298005	0.0220615
promoter	rDPI_25158	ACP5	0.33022	-0.227701	0.022066
promoter	rDPI_38938	PIGX	0.601188	0.11994	0.0221479
promoter	rDPI_13403	UNC119B	0.257558	-0.301142	0.022199
promoter	rDPI_5258	MTR	0.684399	0.257225	0.0222124
promoter	rDPI_5070	COG2	0.0350014	-0.492308	0.0222335
promoter	rDPI_12072	NABP2	0.363883	-0.190059	0.0223186
promoter	rDPI_837	ELOA-AS1	0.545054	0.0376427	0.0223409
promoter	rDPI_16877	TJP1	0.222116	-0.334356	0.022353
promoter	rDPI_46623	FAM120B	0.63751	0.178434	0.0223533
promoter	rDPI_26110	ZNF875	0.455459	-0.0817437	0.0223792
promoter	rDPI_46892	NDUFA4	0.497505	-0.0273094	0.0224243
promoter	rDPI_19565	RNF40	0.354857	-0.199469	0.022455
promoter	rDPI_43756	CANX	0.381934	-0.169023	0.022499
promoter	rDPI_15560	KLHL28	0.574772	0.0815592	0.0225233
promoter	rDPI_21714	PIP4K2B	0.488699	-0.0383808	0.0225539
promoter	rDPI_14182	CAB39L	0.199222	-0.354653	0.0225706
promoter	rDPI_48056	TECPR1	-0.197901	0.35576	0.022596
promoter	rDPI_41896	CCNB1	-0.121514	0.422189	0.0226198
promoter	rDPI_15606	VCPKMT	0.418696	-0.12566	0.0226274
promoter	rDPI_44331	ABT1	0.470428	-0.0614462	0.0226971
promoter	rDPI_54432	ARMCX1	0.357939	-0.195041	0.0227093
promoter	rDPI_29515	GYPC	0.517537	0.000922615	0.02272
promoter	rDPI_53618	TCEANC	0.165541	-0.384177	0.0227241
promoter	rDPI_10989	MLF2	-0.539991	-0.032107	0.0227254
promoter	rDPI_27192	ZNF331	0.42486	-0.117726	0.0227592
promoter	rDPI_3376	MTX1	0.477913	-0.0514819	0.0227779
promoter	rDPI_16475	LINC01550	0.140886	-0.405213	0.0228025
promoter	rDPI_7586	MCMBP	0.78324	0.448022	0.0228562
promoter	rDPI_34549	UBE2G2	0.615717	0.145589	0.0228628
promoter	rDPI_16626	BAG5	0.229821	-0.324761	0.0229791
promoter	rDPI_21070	CYB5D1	0.436527	-0.10241	0.0230407
promoter	rDPI_28326	SOCS5	0.534487	0.0258332	0.0230734
promoter	rDPI_49158	NUB1	0.647416	0.198178	0.0232094
promoter	rDPI_11325	GOLT1B	0.55606	0.0572021	0.023247
promoter	rDPI_51645	RNF38	-0.296788	0.257526	0.0233434
promoter	rDPI_26897	NUCB1	-0.445379	0.0902449	0.0233527
promoter	rDPI_27834	ITSN2	0.357719	-0.192642	0.0233683
promoter	rDPI_35476	ZC3H7B	0.385896	-0.160904	0.0233837
promoter	rDPI_51875	C9orf64	-0.0565746	-0.554861	0.0235158
promoter	rDPI_6573	RPS24	0.781258	0.446177	0.0235321
promoter	rDPI_9399	MALAT1	0.470868	-0.0573867	0.0235419
promoter	rDPI_51385	TEK	0.382374	-0.164226	0.0235595
promoter	rDPI_19146	NDE1	0.60405	0.130273	0.0235796
promoter	rDPI_3596	PEA15	0.172145	-0.37532	0.0235805
promoter	rDPI_4177	B3GALT2	0.559363	0.063845	0.0237044
promoter	rDPI_34518	CSTB	0.168403	-0.377719	0.0238412
promoter	rDPI_11714	TMBIM6	0.355077	-0.19338	0.0239231
promoter	rDPI_14753	LRP10	0.563545	0.0708569	0.0239357
promoter	rDPI_31748	NDUFB3	-0.0836512	-0.572206	0.0239575
promoter	rDPI_44323	BTN2A1	0.389418	-0.154502	0.0239787
promoter	rDPI_2465	FAM102B	0.856544	0.612801	0.0239874
promoter	rDPI_11018	RPL13P5	0.537569	0.0339522	0.0240033
promoter	rDPI_25981	PSENEN	0.50697	-0.00811901	0.0240039
promoter	rDPI_25476	AKAP8L	0.37577	-0.169761	0.0240579
promoter	rDPI_54679	ZBTB33	0.609113	0.140053	0.0240618
promoter	rDPI_7610	TACC2	0.141324	-0.400371	0.0241025
promoter	rDPI_19376	SH2B1	0.55518	0.0594164	0.0241063
promoter	rDPI_31802	TMEM237	0.397123	-0.145035	0.0241208
promoter	rDPI_52016	FAM120AOS	0.494423	-0.024357	0.0241295
promoter	rDPI_3618	NCSTN	0.558042	0.0636605	0.0241348
promoter	rDPI_39351	DHX15	0.523921	0.0154999	0.0241374
promoter	rDPI_35689	TTC38	-0.210009	-0.652289	0.0241713
promoter	rDPI_54777	STK26	0.186336	-0.360558	0.0241779
promoter	rDPI_27649	KIDINS220	0.549677	0.051851	0.0241893
promoter	rDPI_44693	HLA-DQB1	0.00352216	0.515004	0.0241959
promoter	rDPI_34799	MAPK1	0.715658	0.32107	0.0242325
promoter	rDPI_43737	ZFP2	0.262841	-0.288225	0.0242477
promoter	rDPI_18776	SNHG9	0.0748458	-0.454665	0.024307
promoter	rDPI_24906	TRAPPC5	0.671851	0.24357	0.0243088
promoter	rDPI_50387	PDP1	0.454798	-0.0745473	0.0243402
promoter	rDPI_19165	RPS15A	0.720721	0.33085	0.0243546
promoter	rDPI_55143	CMC4	0.713677	0.317933	0.0243723
promoter	rDPI_1698	TTC39A	0.0306071	0.534059	0.0243981
promoter	rDPI_8023	CARS1	0.687261	0.271064	0.0245134
promoter	rDPI_3191	S100A13	0.206046	-0.341368	0.0245274
promoter	rDPI_19373	TUFM	-0.673612	-0.247445	0.0245378
promoter	rDPI_36736	SHISA5	0.52326	0.0164226	0.0245994
promoter	rDPI_12885	RIC8B	0.107426	-0.427171	0.0246304
promoter	rDPI_26725	CALM3	-0.0563545	-0.551539	0.0246549
promoter	rDPI_36873	RBM5	0.622321	0.163303	0.0246983
promoter	rDPI_48267	POLR2J3	0.1957	-0.35004	0.0247646
promoter	rDPI_14743	OXA1L	0.495303	-0.0206666	0.0247681
promoter	rDPI_20185	FCSK	0.468887	-0.0548033	0.0248274
promoter	rDPI_25201	ZNF442	0.536028	0.0350594	0.0248298
promoter	rDPI_29262	RPL31	0.544613	0.0476069	0.0249437
promoter	rDPI_16080	PTGR2	0.477252	-0.0435474	0.0249574
promoter	rDPI_43225	PDGFRB	0.280672	-0.267743	0.0249967
promoter	rDPI_2285	ZNF644	0.158277	-0.382701	0.0249976
promoter	rDPI_52280	PALM2AKAP2	0.529424	0.0265713	0.0250161
promoter	rDPI_17303	GOLM2	0.682198	0.264052	0.0250195
promoter	rDPI_37642	IGSF11	0.381714	-0.159258	0.0250361
promoter	rDPI_34741	TXNRD2	0.500587	-0.0125476	0.0250497
promoter	rDPI_18976	UBALD1	-0.150572	-0.61317	0.0251472
promoter	rDPI_27523	ZNF8-ERVK3-1	0.247211	-0.300219	0.0251625
promoter	rDPI_16402	GON7	0.362122	-0.180833	0.0251707
promoter	rDPI_50657	RAD21	0.444892	-0.0835889	0.025189
promoter	rDPI_21476	NUFIP2	0.581816	0.102779	0.0251989
promoter	rDPI_22266	NFE2L1	0.297622	-0.24966	0.0252253
promoter	rDPI_25226	WDR83	0.283534	-0.263984	0.0252388
promoter	rDPI_44334	H2BC11	0.430804	-0.100381	0.0253178
promoter	rDPI_32368	SPHKAP	0.344291	-0.199838	0.0253404
promoter	rDPI_7377	RBM20	0.225198	-0.320517	0.0253844
promoter	rDPI_17823	RPL4	0.45722	-0.0671664	0.0254601
promoter	rDPI_35321	TMEM184B	0.658643	0.225487	0.0254796
promoter	rDPI_34715	C22orf39	0.323331	-0.22185	0.0254848
promoter	rDPI_35861	THUMPD3	-0.086513	-0.569992	0.0255329
promoter	rDPI_54016	TIMM17B	0.181611	-0.360189	0.0255406
promoter	rDPI_49251	VIPR2	0.45744	-0.0664283	0.0255816
promoter	rDPI_8031	NUP98	0.373569	-0.16644	0.025589
promoter	rDPI_36578	LZTFL1	0.536028	0.0380117	0.0255973
promoter	rDPI_7545	CACUL1	0.634649	0.186553	0.0256334
promoter	rDPI_39368	ZCCHC4	0.394482	-0.142267	0.02565
promoter	rDPI_39971	GPAT3	0.136484	0.602837	0.0256723
promoter	rDPI_31932	BARD1	0.616818	0.158321	0.0256888
promoter	rDPI_27483	ZNF552	0.271206	-0.274755	0.025695
promoter	rDPI_9209	TRPT1	0.401746	-0.133595	0.0257049
promoter	rDPI_13244	SDSL	-0.0383035	0.479022	0.0257289
promoter	rDPI_3142	THEM4	-0.00110067	-0.508546	0.0258271
promoter	rDPI_44766	TAPBP	0.512254	0.00645831	0.0259182
promoter	rDPI_33524	PKIG	0.0294981	-0.484927	0.0260274
promoter	rDPI_49186	GALNT11	0.44049	-0.0858032	0.0260432
promoter	rDPI_5087	GNPAT	0.313032	-0.230654	0.026062
promoter	rDPI_50617	NUDCD1	0.745156	0.382701	0.0260696
promoter	rDPI_4762	RRP15	0.463824	-0.0564641	0.026085
promoter	rDPI_871	SRRM1	0.461843	-0.0588629	0.0261156
promoter	rDPI_22013	IFI35	0.549016	0.0584938	0.0261614
promoter	rDPI_28107	DPY30	0.165762	-0.372183	0.026202
promoter	rDPI_14057	EPSTI1	0.651379	0.216076	0.0262306
promoter	rDPI_32696	RBCK1	0.661285	0.232684	0.0262533
promoter	rDPI_45448	TMEM30A	0.717639	0.331772	0.0262874
promoter	rDPI_9307	PPP2R5B	0.21309	-0.32882	0.0262957
promoter	rDPI_46501	WTAP	0.739653	0.373106	0.0263563
promoter	rDPI_52920	EXOSC2	0.243469	-0.299665	0.0263768
promoter	rDPI_25198	ZNF563	0.288156	-0.255011	0.0264555
promoter	rDPI_37315	EIF4E3	0.619019	0.164595	0.0264587
promoter	rDPI_11362	ABCC9	0.320957	-0.220874	0.026464
promoter	rDPI_9573	KDM2A	0.409231	-0.12197	0.0264698
promoter	rDPI_11184	MANSC1	0.650498	0.215523	0.0264862
promoter	rDPI_28334	MCFD2	0.195039	-0.344874	0.0264921
promoter	rDPI_42014	ZBED3	-0.0365424	-0.532534	0.0265105
promoter	rDPI_6614	PRXL2A	-0.0347813	-0.531242	0.0265208
promoter	rDPI_50292	RBIS	0.673392	0.254457	0.0266096
promoter	rDPI_52114	TRMO	0.52238	0.0228809	0.0266175
promoter	rDPI_33377	MROH8	0.630686	0.183785	0.0266351
promoter	rDPI_3400	ASH1L	0.103463	-0.424034	0.0266958
promoter	rDPI_50593	ZFPM2	0.402847	-0.128657	0.0267006
promoter	rDPI_17343	DUOX1	0.554025	0.06772	0.0267198
promoter	rDPI_35367	GTPBP1	0.401306	-0.130273	0.0267539
promoter	rDPI_37970	RPL32P3	0.447314	-0.0747318	0.0267576
promoter	rDPI_43670	UIMC1	0.659304	0.231207	0.0267829
promoter	rDPI_38586	MFN1	0.470868	-0.0446546	0.0268504
promoter	rDPI_6274	SLC25A16	-0.539771	-0.047976	0.0268643
promoter	rDPI_23055	ACOX1	0.21287	-0.326975	0.0269208
promoter	rDPI_6027	MARCHF8	0.471749	-0.0431784	0.0269457
promoter	rDPI_20840	LOC100130950	0.544613	0.0553569	0.0270131
promoter	rDPI_27629	RPS7	0.184693	-0.352624	0.0270141
promoter	rDPI_42536	MCC	0.312812	-0.227517	0.0270268
promoter	rDPI_35966	MKRN2	0.241488	-0.299296	0.0270621
promoter	rDPI_27217	TFPT	-0.0515115	0.464814	0.0270921
promoter	rDPI_52963	POMT1	0.543073	0.0535117	0.0271062
promoter	rDPI_37931	ACAD9	-0.0589961	-0.546926	0.0271117
promoter	rDPI_53035	SURF2	0.472409	-0.0417022	0.0271191
promoter	rDPI_51073	CYHR1	0.274068	-0.267005	0.0271194
promoter	rDPI_7412	TCF7L2	0.608673	0.15094	0.0271704
promoter	rDPI_44296	H2BC6	0.185574	-0.350594	0.0274035
promoter	rDPI_47948	CDK6	0.597446	0.134517	0.0274151
promoter	rDPI_866	NIPAL3	-0.222336	-0.652658	0.0274222
promoter	rDPI_33097	PYGB	0.162459	-0.37126	0.0274241
promoter	rDPI_27824	FKBP1B	0.243029	-0.296344	0.0275076
promoter	rDPI_35230	APOL1	0.598767	0.137101	0.0275761
promoter	rDPI_14339	CLN5	0.76761	0.431599	0.0277533
promoter	rDPI_52407	RGS3	0.288377	-0.250213	0.0278063
promoter	rDPI_45738	ZBTB24	0.547035	0.0616307	0.0278074
promoter	rDPI_22086	TMUB2	0.415394	-0.109791	0.0278308
promoter	rDPI_19756	FTO	0.422659	-0.100934	0.0278718
promoter	rDPI_21146	GAS7	-0.132521	-0.595087	0.0278727
promoter	rDPI_37706	NDUFB4	-0.00220135	-0.503563	0.0279671
promoter	rDPI_23342	PYCR1	-0.449075	0.068089	0.0280046
promoter	rDPI_17171	MAPKBP1	0.288817	-0.248922	0.0280608
promoter	rDPI_28066	YPEL5	0.766509	0.430308	0.0280616
promoter	rDPI_36686	DHX30	0.353536	-0.17991	0.0281089
promoter	rDPI_7934	H19	-0.699251	-0.304575	0.0281348
promoter	rDPI_43470	CCNJL	0.461623	-0.051851	0.0281375
promoter	rDPI_25763	ZNF724	0.405048	-0.120678	0.0282309
promoter	rDPI_18171	CRABP1	-0.134386	0.393234	0.0282647
promoter	rDPI_15783	PSMA3-AS1	-0.307528	-0.700634	0.0282912
promoter	rDPI_39206	MRFAP1L1	0.0684619	-0.447837	0.0283402
promoter	rDPI_33510	FITM2	0.254256	-0.282689	0.0283405
promoter	rDPI_52452	CDK5RAP2	0.723803	0.349671	0.0283525
promoter	rDPI_27960	SNX17	0.190637	-0.342844	0.0284125
promoter	rDPI_20892	MIR497HG	0.503228	0.00350594	0.0284689
promoter	rDPI_39050	CPLX1	-0.415835	0.107023	0.0284786
promoter	rDPI_2654	RHOC	0.493762	-0.00885711	0.0285361
promoter	rDPI_54243	PDZD11	0.685059	0.281029	0.0285631
promoter	rDPI_10595	SPA17	0.62012	0.173636	0.0285635
promoter	rDPI_53611	TMSB4X	0.790504	0.480129	0.028611
promoter	rDPI_27157	ZNF528	0.577414	0.108684	0.0286583
promoter	rDPI_40629	MAML3	0.463604	-0.0472379	0.0287435
promoter	rDPI_23295	ARL16	0.459201	-0.0527736	0.0287563
promoter	rDPI_36985	RPL29	0.547255	0.0653212	0.0287799
promoter	rDPI_25523	CPAMD8	0.472409	-0.0357975	0.0287974
promoter	rDPI_52825	SPOUT1	-0.440049	0.076208	0.0288942
promoter	rDPI_276	PER3	0.60493	0.151124	0.0289094
promoter	rDPI_25207	ZNF709	0.502127	0.00369046	0.0289503
promoter	rDPI_48084	PDAP1	0.149912	-0.377719	0.0289532
promoter	rDPI_44301	H2BC7	0.183152	-0.34801	0.0289607
promoter	rDPI_9253	PLCB3	0.579175	0.112375	0.0289759
promoter	rDPI_29206	MGAT4A	0.664807	0.247814	0.0289971
promoter	rDPI_14277	PCDH9	0.679556	0.27291	0.0290007
promoter	rDPI_20202	ZNF23	0.471529	-0.0361665	0.0290205
promoter	rDPI_38500	PHC3	0.600528	0.145035	0.0291113
promoter	rDPI_14284	DIS3	0.617258	0.171053	0.0291393
promoter	rDPI_34334	TMEM50B	-0.035882	-0.525337	0.029147
promoter	rDPI_22675	CYB561	0.0748458	-0.440457	0.0291478
promoter	rDPI_15366	KHNYN	0.433666	-0.0830354	0.029193
promoter	rDPI_12080	COQ10A	0.143528	-0.382516	0.0292224
promoter	rDPI_12019	SUOX	0.0339008	-0.472748	0.0292261
promoter	rDPI_15514	MBIP	0.631347	0.193749	0.0292541
promoter	rDPI_51306	PSIP1	0.464044	-0.0448391	0.0292837
promoter	rDPI_2726	VANGL1	0.428823	-0.0885711	0.029303
promoter	rDPI_8295	FAR1	0.545714	0.0649521	0.0293157
promoter	rDPI_17894	RPLP1	0.679116	0.273279	0.029359
promoter	rDPI_10972	CHD4	0.336586	-0.194303	0.0293664
promoter	rDPI_48499	ST7	0.677795	0.271249	0.0294346
promoter	rDPI_8178	SWAP70	0.595465	0.138392	0.029437
promoter	rDPI_36513	ZNF662	0.477693	-0.0267558	0.0294524
promoter	rDPI_38548	NAALADL2	0.575212	0.108131	0.0294612
promoter	rDPI_54377	SH3BGRL	0.546375	0.0664283	0.0294763
promoter	rDPI_36437	ENTPD3-AS1	0.182051	-0.347457	0.0294822
promoter	rDPI_38943	PAK2	0.58776	0.126952	0.0294988
promoter	rDPI_36196	NGLY1	0.335265	-0.195041	0.0295808
promoter	rDPI_36828	GPX1	-0.331743	0.198731	0.0296177
promoter	rDPI_40976	CLCN3	-0.0250954	-0.516295	0.0296243
promoter	rDPI_38694	EIF4G1	0.650278	0.225672	0.0296298
promoter	rDPI_37393	ARL13B	0.562665	0.0904163	0.0296587
promoter	rDPI_9374	SLC25A45	-0.24435	0.288159	0.0296908
promoter	rDPI_14280	DACH1	0.34943	-0.179188	0.0296948
promoter	rDPI_34344	CRYZL1	-0.0446874	-0.530319	0.0297148
promoter	rDPI_13804	RPL21	0.361461	-0.165702	0.0297335
promoter	rDPI_12357	TMBIM4	0.334385	-0.19541	0.0297625
promoter	rDPI_9499	BANF1	0.389418	-0.133595	0.0298225
promoter	rDPI_35736	TRABD	0.108747	-0.410564	0.029836
promoter	rDPI_27966	PPM1G	0.435427	-0.0786068	0.0298735
promoter	rDPI_47457	SEC61G	0.306868	-0.224196	0.0299305
promoter	rDPI_11051	C1S	0.593263	0.136732	0.0299485
promoter	rDPI_21163	ADPRM	0.68638	0.287671	0.0299605
promoter	rDPI_22166	MAP3K14	0.417155	-0.100381	0.0299878
promoter	rDPI_42703	SLC22A5	0.446433	-0.0645831	0.0300038
promoter	rDPI_54915	RBMX	-0.328661	0.200577	0.0300793
promoter	rDPI_22490	SCPEP1	-0.0418256	-0.527367	0.0300852
promoter	rDPI_13978	SUPT20H	0.330422	-0.198547	0.0301212
promoter	rDPI_53694	PHKA2	0.237966	-0.292838	0.030193
promoter	rDPI_50772	ZNF572	0.32624	-0.202791	0.0302017
promoter	rDPI_29475	PTPN4	0.513574	0.0234344	0.0302387
promoter	rDPI_5004	H2AW	-0.0790284	-0.553385	0.0302632
promoter	rDPI_3053	CTSK	0.62056	0.17991	0.0302716
promoter	rDPI_27061	MYH14	0.308629	-0.221243	0.0302818
promoter	rDPI_35017	MTMR3	0.434986	-0.0776842	0.0303185
promoter	rDPI_25333	STX10	0.185574	-0.341737	0.0303383
promoter	rDPI_38045	TOPBP1	0.158277	-0.366278	0.0303595
promoter	rDPI_21219	NCOR1	0.409231	-0.1085	0.0303966
promoter	rDPI_39751	UTP3	0.675594	0.270511	0.030417
promoter	rDPI_20294	ADAT1	0.53933	0.0596009	0.0304198
promoter	rDPI_54403	TSPAN6	0.289697	-0.240434	0.0304409
promoter	rDPI_45618	NDUFAF4	0.526122	0.0413332	0.0304589
promoter	rDPI_51123	ZNF517	0.479454	-0.0210356	0.0304888
promoter	rDPI_9845	LOC100287896	0.564205	0.0953984	0.0304954
promoter	rDPI_11797	ACVR1B	0.250734	-0.279368	0.030526
promoter	rDPI_44752	RPS18	-0.42527	0.088796	0.0305422
promoter	rDPI_20484	ANKRD11	0.104322	-0.412342	0.0305438
promoter	rDPI_38342	GMPS	0.655341	0.236928	0.0305579
promoter	rDPI_47414	SEPTIN7P2	0.521279	0.0350594	0.0305783
promoter	rDPI_24669	DAPK3	-0.618359	-0.177696	0.0306643
promoter	rDPI_53932	NDUFB11	0.510493	0.0206666	0.0306688
promoter	rDPI_34291	SCAF4	0.499926	0.00673571	0.0307471
promoter	rDPI_28860	PRADC1	0.0151893	-0.483266	0.0307609
promoter	rDPI_48110	FAM200A	0.34275	-0.183047	0.0307882
promoter	rDPI_48175	LRCH4	0.545934	0.0701188	0.0307887
promoter	rDPI_51465	UBAP2	0.562885	0.0944758	0.030804
promoter	rDPI_51367	LINC01241	0.385016	-0.13544	0.0308271
promoter	rDPI_34328	IFNAR1	0.639932	0.212571	0.0308321
promoter	rDPI_24627	FZR1	0.634649	0.204082	0.0308393
promoter	rDPI_3109	PI4KB	0.492221	-0.00313689	0.0308542
promoter	rDPI_2428	DPH5	-0.768711	-0.442302	0.0308681
promoter	rDPI_19735	CYLD	0.1957	-0.33085	0.0308805
promoter	rDPI_32339	MRPL44	0.12988	-0.389528	0.0309358
promoter	rDPI_48299	ORC5	0.451276	-0.0553569	0.0309809
promoter	rDPI_46385	MTRF1L	-0.215512	-0.641402	0.0310143
promoter	rDPI_25957	DMKN	0.185794	-0.339522	0.0310385
promoter	rDPI_7177	OGA	0.492882	-0.00166071	0.0310414
promoter	rDPI_39837	G3BP2	0.480334	-0.0180833	0.0310466
promoter	rDPI_1731	PRPF38A	0.600087	0.150755	0.031088
promoter	rDPI_4420	CHI3L1	-0.144	0.37675	0.0311181
promoter	rDPI_27825	SF3B6	0.599867	0.150571	0.0311362
promoter	rDPI_31594	WDR75	0.63641	0.207957	0.0311783
promoter	rDPI_44273	H1-1	0.0275168	-0.472564	0.0312378
promoter	rDPI_24584	TLE5	-0.156414	-0.60339	0.0312807
promoter	rDPI_22145	DCAKD	0.374669	-0.145773	0.0313086
promoter	rDPI_32136	TMBIM1	0.585338	0.129166	0.0313117
promoter	rDPI_54046	PLP2	0.453478	-0.0514819	0.0313293
promoter	rDPI_50063	NSMAF	0.533166	0.0546188	0.0315527
promoter	rDPI_33085	ENTPD6	0.306868	-0.219029	0.031605
promoter	rDPI_9112	UBXN1	0.667008	0.259624	0.0316336
promoter	rDPI_51990	BICD2	0.4456	-0.060339	0.0316398
promoter	rDPI_42606	LOX	-0.0173906	0.479391	0.0316474
promoter	rDPI_33814	VAPB	-0.247652	-0.65967	0.0317315
promoter	rDPI_27554	ZNF324	0.390079	-0.126583	0.0317825
promoter	rDPI_50088	YTHDF3	0.354857	-0.16644	0.0318351
promoter	rDPI_5653	NMT2	0.083211	-0.426433	0.0318543
promoter	rDPI_52926	LAMC3	0.427418	-0.0819015	0.0318903
promoter	rDPI_50450	MTDH	0.676914	0.277154	0.0318961
promoter	rDPI_25716	ZNF14	0.024435	-0.473302	0.0319101
promoter	rDPI_36717	NME6	0.197681	-0.326052	0.0319209
promoter	rDPI_19289	NDUFAB1	0.264382	-0.261654	0.0319292
promoter	rDPI_24273	ZNF236-DT	0.187115	-0.335463	0.0320503
promoter	rDPI_49675	DPYSL2	0.297402	-0.227517	0.0320759
promoter	rDPI_27044	AKT1S1	0.186454	-0.335832	0.032136
promoter	rDPI_27625	RNASEH1	0.116011	-0.398201	0.0321372
promoter	rDPI_135	SSU72	0.129659	-0.386207	0.0322388
promoter	rDPI_50760	NDUFB9	0.525021	0.0455772	0.0322674
promoter	rDPI_11651	ZNF641	0.675374	0.275677	0.0322925
promoter	rDPI_11895	ATP5MC2	0.341869	-0.179172	0.0323651
promoter	rDPI_38669	EIF2B5	0.464925	-0.0335832	0.0324176
promoter	rDPI_29609	C2orf27A	0.491121	0.000369046	0.032419
[truncated: 8,694 more rows]

## Sheet: D
Pathway	Total number of Heart CAGE TREs	UP-female	DOWN-female	UP-male	DOWN-male	Pvalue adjusted
hsa04260~Cardiac_muscle_contraction	39	6	10	0	9	0.0309845
hsa04261~Adrenergic_signaling_in_cardiomyocytes	79	26	12	8	11	0.0309845
hsa04270~Vascular_smooth_muscle_contraction	54	23	3	6	4	0.0413127
hsa04310~Wnt_signaling_pathway	63	34	5	15	6	0.0464768
hsa04150~mTOR_signaling_pathway	90	40	6	13	5	0.0495752
