# Supplementary material for: Sex modulates the human genome regulatory network during heart failure and aging.
Source: Research Square preprint supplement (doi:10.21203/rs.3.rs-2202852/v1), 2022-11-11
Supplement: Supplementary file 2 [file 53d1b90b5bccd2aa53392c88.xlsx]

## Sheet: Sheet1
Subject #	Primary Phenotype	Cardiomyopathy type	Cardiomyopathy subtype	Sex	Age	Ethnicity	BMI	LVEF (%)	Cause of Death	CAGE				RNA-Seq
1	Healthy	None	None	Female	26	African (Kenya)	36.1	60-65	Infectious Disease	LA	RA	LV	RV	LA	RA	LV	RV
2	Healthy	None	None	Female	35	Asian (Korean)	31.5	65	CVA/Stroke	LA	RA	LV	RV		RA
3	Healthy	None	None	Female	36	Asian (Filipino)	31.7	N/A	CVA/Stroke	LA	RA	LV	RV	LA	RA	LV	RV
4	Healthy	None	None	Female	39	African (Gumuz)	36	45-50	Anoxia	LA	RA	LV	RV	LA			RV
5	Healthy	None	None	Female	46	Asian	28	55	CVA/Stroke	LA	RA	LV	RV
6	Healthy	None	None	Female	53	Western European	41.7	52	Anoxia/Drug Intoxication	LA		LV
7	Healthy	None	None	Female	56	Hispanic or Latino	38.9	N/A	Anoxia	LA	RA	LV	RV
8	Healthy	None	None	Female	60	European-African	24.2	60-65	CVA/ICH/Stroke	LA		LV
9	Healthy	None	None	Female	60	White or Caucasian	28	N/A	CVA/Stroke	LA	RA	LV	RV
10	Healthy	None	None	Female	64	Western European	21	60	CVA/ICH/Stroke	LA		LV
11	Healthy	None	None	Female	71	White or Caucasian	27	43	Anoxia	LA	RA	LV	RV
12	Healthy	None	None	Male	26	European-Native American	26.4	65	Anoxia/Drug Intoxication	LA	RA	LV	RV	LA		LV	RV
13	Healthy	None	None	Male	28	African (Kenya)	18.3	25-30	Anoxia/Cardiovascular	LA	RA	LV	RV			LV	RV
14	Healthy	None	None	Male	34	African (Gumuz)	38.2	65	Anoxia	LA	RA	LV	RV	LA	RA	LV	RV
15	Healthy	None	None	Male	43	Western European	27.8	N/A	Head Trauma/Blunt Injury	LA		LV
16	Healthy	None	None	Male	47	Asian Indian	23.9	25-30	Cardiac arrest (DCD)	LA	RA	LV	RV
17	Healthy	None	None	Male	51	African	26.3	N/A	CVA/ICH/Stroke	LA
18	Healthy	None	None	Male	53	White or Caucasian	38	N/A	CVA/Stroke	LA	RA	LV	RV
19	Healthy	None	None	Male	57	Asian	41	60	CVA/Stroke	LA	RA	LV	RV
20	Healthy	None	None	Male	60	European-Native American	22.8	N/A	CVA/ICH/Stroke	LA		LV
21	Healthy	None	None	Male	61	Western European	23.2	N/A	Head Trauma	LA		LV
22	Failing	NICM	NA	Female	45	Black or African American	27.1	14		LA	RA	LV	RV
23	Failing	ICM	NA	Female	52	Asian	21	34		LA	RA	LV	RV
24	Failing	NICM	HFpEF	Female	59	White or Caucasian	31.9	70		LA	RA	LV	RV
25	Failing	NICM	Genetic	Male	36	White or Caucasian	24.1	14		LA	RA	LV	RV
26	Failing	NICM	NA	Male	47	N/A	20.8	24			RA		RV
27	Failing	ICM	NA	Male	48	White or Caucasian	25.6	29		LA		LV	RV
28	Failing	NICM	NA	Male	51	White or Caucasian	28.5	21		LA	RA	LV	RV
29	Failing	ICM	NA	Male	57	Asian	27.5	55				LV	RV
30	Failing	NICM	HFpEF	Male	57	White or Caucasian	45.6	60		LA		LV	RV
31	Failing	ICM	NA	Male	58	White or Caucasian	33	30		LA	RA	LV	RV
