# Supplementary material for: Sex modulates the human genome regulatory network during heart failure and aging.
Source: Research Square preprint supplement (doi:10.21203/rs.3.rs-2202852/v1), 2022-11-11
Supplement: Supplementary file 3 [file ce33da970e842e7e7a4143bd.xlsx]

## Sheet: male atria
logFC	logCPM	F	PValue	FDR	cluster_id2	cluster_chr	cluster_start	cluster_end	cluster_id1	cluster_tagcount	cluster_strand	TSS_or_center	transcriptId	geneId	cons_clust_class	geneId2	geneName2
-0.0807884	3.9666	74.2351	1.88725e-08	0.00123233	rDPI_14919	chr14	23394118	23394127	chr14:23394118..23394127,chr14:23394061..23394133,-;peak:chr14:23394123..23394124,-;peakCounts:5572.8	9252	-	23394123	ENST00000362287.2	ENSG00000199157.2	enhancer	ENSG00000199157	MIR208A
0.0534991	2.22014	57.873	1.47542e-07	0.00481711	rDPI_41538	chr5	36241906	36241911	chr5:36241906..36241911,chr5:36241840..36241992,-;peak:chr5:36241908..36241909,-;peakCounts:1789.2	3014	-	36241908	ENST00000381937.9	ENSG00000152620.13	alternative	ENSG00000152620	NADK2
-0.0633105	4.36726	48.7681	5.63684e-07	0.0122692	rDPI_21285	chr17	17836980	17836992	chr17:17836980..17836992,chr17:17836936..17837041,-;peak:chr17:17836986..17836987,-;peakCounts:3222	5221	-	17836986	ENST00000355815.8	ENSG00000072310.17	promoter	ENSG00000072310	SREBF1
-0.0702527	3.28999	45.0197	1.03144e-06	0.0168377	rDPI_14830	chr14	23385947	23385955	chr14:23385947..23385955,chr14:23385926..23386141,-;peak:chr14:23385949..23385950,-;peakCounts:1966.1	4861	-	23385949	ENST00000651452.1	ENSG00000197616.13	alternative	ENSG00000197616	MYH6
-0.0492942	5.31212	39.538	2.66586e-06	0.02775	rDPI_7489	chr10	114526902	114526930	chr10:114526902..114526930,chr10:114526718..114526976,-;peak:chr10:114526910..114526911,-;peakCounts:1862.1	12376	-	114526910	ENST00000428430.1	ENSG00000099204.20	promoter	ENSG00000099204	ABLIM1
-0.0636252	1.51584	37.0352	4.2362e-06	0.02775	rDPI_10408	chr11	118368732	118368733	chr11:118368732..118368733,+	812	+	118368732	ENST00000431736.6	ENSG00000110344.10	enhancer	ENSG00000110344	UBE4A
0.228966	7.69238	36.8145	4.41708e-06	0.02775	rDPI_21386	chr17	22524410	22524433	chr17:22524410..22524433,+	57231	+	22524413	ENST00000579262.1	ENSG00000264168.2	not_classified	ENSG00000264168	MTND1P15
-0.0470261	2.99866	36.7245	4.49322e-06	0.02775	rDPI_7488	chr10	114526868	114526883	chr10:114526868..114526883,chr10:114526718..114526976,-;peak:chr10:114526878..114526879,-;peakCounts:323.1	1919	-	114526878	ENST00000369253.6	ENSG00000099204.20	alternative	ENSG00000099204	ABLIM1
0.0427611	1.37929	36.1676	4.99774e-06	0.02775	rDPI_68	chr1	1214148	1214154	chr1:1214148..1214154,chr1:1214111..1214165,-;peak:chr1:1214153..1214154,-;peakCounts:5209.2	6066	-	1214153	ENST00000379236.4	ENSG00000186827.11	promoter	ENSG00000186827	TNFRSF4
-0.0572691	1.97225	36.1583	5.00672e-06	0.02775	rDPI_14819	chr14	23384503	23384508	chr14:23384503..23384508,chr14:23384216..23384714,-;peak:chr14:23384505..23384506,-;peakCounts:553.4	1199	-	23384505	ENST00000651452.1	ENSG00000197616.13	alternative	ENSG00000197616	MYH6
-0.0902023	2.74348	35.9258	5.23581e-06	0.02775	rDPI_53469	chrM	9448	9459	chrM:9448..9459,chrM:9359..9631,+;peak:chrM:9453..9454,+;peakCounts:240	7911	+	9453	ENST00000362079.2	ENSG00000198938.2	alternative	ENSG00000198938	COX3
-0.0618514	1.59052	35.5557	5.62461e-06	0.02775	rDPI_30151	chr2	176201227	176201238	chr2:176201227..176201238,chr2:176201110..176201250,-;peak:chr2:176201232..176201233,-;peakCounts:554.4	1021	-	176201232	ENST00000405359.2	ENSG00000218175.2	alternative	ENSG00000218175	NA
0.0408027	2.61735	35.0092	6.25751e-06	0.02775	rDPI_24498	chr19	1941146	1941152	chr19:1941146..1941152,chr19:1941093..1941253,+;peak:chr19:1941150..1941151,+;peakCounts:811.9	3445	+	1941150	ENST00000255641.13	ENSG00000133275.16	alternative	ENSG00000133275	CSNK1G2
-0.100337	3.56504	34.4431	6.99629e-06	0.02775	rDPI_32055	chr2	216695352	216695370	chr2:216695352..216695370,chr2:216695222..216695448,-;peak:chr2:216695357..216695358,-;peakCounts:788.4	2337	-	216695357	ENST00000233813.5	ENSG00000115461.5	alternative	ENSG00000115461	IGFBP5
-0.0512419	1.29501	34.3052	7.19035e-06	0.02775	rDPI_21554	chr17	31899703	31899704	chr17:31899703..31899704,-	485	-	31899703	ENST00000490218.6	ENSG00000108651.10	alternative	ENSG00000108651	UTP6
0.0593008	4.05253	33.839	7.89125e-06	0.02775	rDPI_33658	chr20	47785472	47785491	chr20:47785472..47785491,chr20:47785354..47785527,-;peak:chr20:47785483..47785484,-;peakCounts:1467	7328	-	47785483	ENST00000437955.1	ENSG00000196562.14	promoter	ENSG00000196562	SULF2
0.0414107	1.76998	33.7558	8.02402e-06	0.02775	rDPI_41283	chr5	1345038	1345040	chr5:1345038..1345040,chr5:1344946..1345136,-;peak:chr5:1345039..1345040,-;peakCounts:902.5	1287	-	1345039	ENST00000320895.10	ENSG00000049656.14	alternative	ENSG00000049656	CLPTM1L
-0.0763864	3.44662	33.7351	8.05737e-06	0.02775	rDPI_20750	chr17	4705298	4705300	chr17:4705298..4705300,-	10875	-	4705299	ENST00000466297.1	ENSG00000213939.4	promoter	ENSG00000213939	RPS12P29
-0.233707	5.50551	33.5758	8.31966e-06	0.02775	rDPI_47029	chr7	25838987	25839141	chr7:25838987..25839141,chr7:25838987..25839141,+	9650	+	25839076	ENST00000659273.1	ENSG00000287096.1	enhancer	ENSG00000287096	NA
0.0498408	2.52309	32.8987	9.54351e-06	0.02775	rDPI_25850	chr19	33194314	33194342	chr19:33194314..33194342,chr19:33194217..33194377,+;peak:chr19:33194330..33194331,+;peakCounts:700.2	3520	+	33194330	ENST00000253193.9	ENSG00000130881.14	promoter	ENSG00000130881	LRP3
0.0992835	4.41554	32.4572	1.04469e-05	0.02775	rDPI_39811	chr4	74099195	74099197	chr4:74099195..74099197,chr4:74099126..74099330,-;peak:chr4:74099195..74099196,-;peakCounts:20424.6	23950	-	74099195	ENST00000508487.3	ENSG00000081041.9	promoter	ENSG00000081041	CXCL2
-0.0392171	4.72955	32.3089	1.07711e-05	0.02775	rDPI_32716	chr20	1118602	1118609	chr20:1118602..1118609,chr20:1118574..1118759,+;peak:chr20:1118603..1118604,+;peakCounts:10240.2	15057	+	1118603	ENST00000335877.11	ENSG00000125818.18	promoter	ENSG00000125818	PSMF1
0.0900822	3.29264	32.1757	1.10715e-05	0.02775	rDPI_44691	chr6	32666657	32666669	chr6:32666657..32666669,chr6:32666611..32666742,-;peak:chr6:32666657..32666658,-;peakCounts:3647.7	6390	-	32666657	ENST00000399079.7	ENSG00000179344.16	promoter	ENSG00000179344	HLA-DQB1
0.0667054	3.43467	32.0397	1.13879e-05	0.02775	rDPI_50781	chr8	125430355	125430379	chr8:125430355..125430379,chr8:125430153..125430497,+;peak:chr8:125430374..125430375,+;peakCounts:1219	7812	+	125430374	ENST00000311922.4	ENSG00000173334.4	promoter	ENSG00000173334	TRIB1
0.0432941	3.86157	31.8206	1.19183e-05	0.02775	rDPI_31504	chr2	183038489	183038502	chr2:183038489..183038502,chr2:183038091..183038544,-;peak:chr2:183038501..183038502,-;peakCounts:3155.5	10175	-	183038501	ENST00000361354.9	ENSG00000061676.15	alternative	ENSG00000061676	NCKAP1
0.0517365	4.10807	31.2855	1.33313e-05	0.02775	rDPI_41284	chr5	1345042	1345060	chr5:1345042..1345060,chr5:1344946..1345136,-;peak:chr5:1345054..1345055,-;peakCounts:3406.5	10797	-	1345054	ENST00000320895.10	ENSG00000049656.14	promoter	ENSG00000049656	CLPTM1L
-0.0367357	3.69642	31.2084	1.35496e-05	0.02775	rDPI_18044	chr15	74843126	74843144	chr15:74843126..74843144,chr15:74843076..74843251,-;peak:chr15:74843130..74843131,-;peakCounts:1083.4	3832	-	74843130	ENST00000566479.5	ENSG00000140474.14	alternative	ENSG00000140474	ULK3
-0.0430704	3.10414	31.2005	1.3572e-05	0.02775	rDPI_3956	chr1	175193072	175193094	chr1:175193072..175193094,chr1:175192872..175193170,-;peak:chr1:175193088..175193089,-;peakCounts:587.6	3149	-	175193088	ENST00000563563.2	ENSG00000235750.10	alternative	ENSG00000235750	KIAA0040
0.0337372	5.16855	31.1043	1.38505e-05	0.02775	rDPI_53669	chrX	15854808	15854814	chrX:15854808..15854814,chrX:15854725..15854885,-;peak:chrX:15854813..15854814,-;peakCounts:21109.5	25447	-	15854813	ENST00000672987.1	ENSG00000182287.15	promoter	ENSG00000182287	AP1S2
0.0382066	2.07411	31.0801	1.39214e-05	0.02775	rDPI_454	chr1	11926403	11926406	chr1:11926403..11926406,chr1:11926373..11926473,-;peak:chr1:11926403..11926404,-;peakCounts:1609.1	1985	-	11926403	ENST00000616327.1	ENSG00000116685.16	alternative	ENSG00000116685	KIAA2013
-0.0688725	4.11391	30.9334	1.43604e-05	0.02775	rDPI_14924	chr14	23394271	23394279	chr14:23394271..23394279,chr14:23394156..23394296,-;peak:chr14:23394276..23394277,-;peakCounts:6923.7	11013	-	23394276	ENST00000362287.2	ENSG00000199157.2	alternative	ENSG00000199157	MIR208A
-0.0481516	6.08363	30.7398	1.49632e-05	0.02775	rDPI_35973	chr3	12664113	12664132	chr3:12664113..12664132,chr3:12663824..12664256,-;peak:chr3:12664117..12664118,-;peakCounts:8640.7	27259	-	12664117	ENST00000251849.9	ENSG00000132155.13	promoter	ENSG00000132155	RAF1
-0.0669374	1.57505	30.5622	1.55405e-05	0.02775	rDPI_9364	chr11	65341064	65341065	chr11:65341064..65341065,+	819	+	65341064	ENST00000530973.1	ENSG00000133884.10	enhancer	ENSG00000133884	DPF2
0.0661869	3.83166	30.3802	1.61574e-05	0.02775	rDPI_35328	chr22	38317378	38317409	chr22:38317378..38317409,chr22:38317172..38317488,-;peak:chr22:38317394..38317395,-;peakCounts:1208.1	8160	-	38317394	ENST00000413574.6	ENSG00000213923.13	promoter	ENSG00000213923	CSNK1E
-0.07143	5.32247	30.0376	1.73924e-05	0.02775	rDPI_33512	chr20	44466849	44466871	chr20:44466849..44466871,-	17711	-	44466866	ENST00000412502.1	ENSG00000226243.1	promoter	ENSG00000226243	NA
-0.0510763	1.38033	30.021	1.7455e-05	0.02775	rDPI_44956	chr6	37044896	37044905	chr6:37044896..37044905,chr6:37044892..37044959,+;peak:chr6:37044899..37044900,+;peakCounts:193.5	553	+	37044899	ENST00000620597.2	ENSG00000226976.3	promoter	ENSG00000226976	NA
0.109134	2.86006	29.5763	1.9222e-05	0.02775	rDPI_38369	chr3	157436801	157436914	chr3:157436801..157436914,chr3:157436801..157436914,+	12595	+	157436850	ENST00000295927.4	ENSG00000163661.4	promoter	ENSG00000163661	PTX3
-0.084814	4.31582	29.5605	1.92883e-05	0.02775	rDPI_15600	chr14	49862848	49862849	chr14:49862848..49862849,-	74894	-	49862848	ENST00000490232.3	ENSG00000274012.1	promoter	ENSG00000274012	RN7SL2
0.0586426	2.12663	29.5383	1.93819e-05	0.02775	rDPI_33694	chr20	49713848	49713857	chr20:49713848..49713857,chr20:49713747..49713953,-;peak:chr20:49713852..49713853,-;peakCounts:717.1	4537	-	49713852	ENST00000371711.4	ENSG00000158470.5	alternative	ENSG00000158470	B4GALT5
-0.0356567	2.9916	29.4606	1.97133e-05	0.02775	rDPI_10263	chr11	111913276	111913287	chr11:111913276..111913287,chr11:111913221..111913325,+;peak:chr11:111913281..111913282,+;peakCounts:1344.6	3333	+	111913281	ENST00000534100.1	ENSG00000254445.1	alternative	ENSG00000254445	HSPB2-C11orf52
0.0486196	3.77793	29.4544	1.97396e-05	0.02775	rDPI_32034	chr2	216633394	216633404	chr2:216633394..216633404,chr2:216633340..216633960,+;peak:chr2:216633394..216633395,+;peakCounts:4115	11499	+	216633394	ENST00000233809.9	ENSG00000115457.10	alternative	ENSG00000115457	IGFBP2
-0.0437639	7.50678	29.4503	1.97576e-05	0.02775	rDPI_38385	chr3	158571191	158571200	chr3:158571191..158571200,chr3:158571118..158571403,+;peak:chr3:158571194..158571195,+;peakCounts:63747.9	93341	+	158571194	ENST00000619577.5	ENSG00000178053.20	promoter	ENSG00000178053	MLF1
0.0527088	2.48876	29.4424	1.97915e-05	0.02775	rDPI_22663	chr17	62627413	62627431	chr17:62627413..62627431,chr17:62627359..62627453,+;peak:chr17:62627418..62627419,+;peakCounts:606.6	2558	+	62627418	ENST00000303375.10	ENSG00000011028.14	alternative	ENSG00000011028	MRC2
-0.0444515	5.82846	29.3857	2.00383e-05	0.02775	rDPI_14842	chr14	23386596	23386603	chr14:23386596..23386603,chr14:23386285..23386629,-;peak:chr14:23386601..23386602,-;peakCounts:8620.2	13034	-	23386601	ENST00000362287.2	ENSG00000199157.2	alternative	ENSG00000199157	MIR208A
0.0485173	4.52516	29.381	2.00591e-05	0.02775	rDPI_33695	chr20	49713873	49713884	chr20:49713873..49713884,chr20:49713747..49713953,-;peak:chr20:49713878..49713879,-;peakCounts:11348.1	16876	-	49713878	ENST00000371711.4	ENSG00000158470.5	promoter	ENSG00000158470	B4GALT5
-0.0394066	1.23419	29.3798	2.00644e-05	0.02775	rDPI_28774	chr2	69896440	69896449	chr2:69896440..69896449,+	389	+	69896440	ENST00000488986.1	ENSG00000124380.11	promoter	ENSG00000124380	SNRNP27
0.0422634	2.70558	29.3186	2.03345e-05	0.02775	rDPI_9011	chr11	61581051	61581064	chr11:61581051..61581064,chr11:61580987..61581232,-;peak:chr11:61581056..61581057,-;peakCounts:823.8	2515	-	61581056	ENST00000539008.6	ENSG00000011347.10	alternative	ENSG00000011347	SYT7
-0.0511763	4.51611	29.3042	2.03988e-05	0.02775	rDPI_15014	chr14	23405305	23405320	chr14:23405305..23405320,chr14:23405226..23405397,-;peak:chr14:23405312..23405313,-;peakCounts:1998.9	4821	-	23405312	ENST00000557461.2	ENSG00000197616.13	alternative	ENSG00000197616	MYH6
-0.101038	3.16346	28.9492	2.20547e-05	0.0293903	rDPI_43780	chr5	179822954	179823048	chr5:179822954..179823048,chr5:179822954..179823048,+	7057	+	179823045	ENST00000360718.5	ENSG00000161011.20	enhancer	ENSG00000161011	SQSTM1
0.0331306	2.43395	28.6487	2.35715e-05	0.0294673	rDPI_21493	chr17	29589643	29589649	chr17:29589643..29589649,chr17:29589462..29589676,-;peak:chr17:29589648..29589649,-;peakCounts:2078.1	2449	-	29589648	ENST00000225394.8	ENSG00000108262.16	alternative	ENSG00000108262	GIT1
-0.085293	8.31319	28.4926	2.44038e-05	0.0294673	rDPI_42764	chr5	134176949	134176951	chr5:134176949..134176951,chr5:134176898..134177077,-;peak:chr5:134176950..134176951,-;peakCounts:86830.2	98199	-	134176950	ENST00000353411.11	ENSG00000113558.19	promoter	ENSG00000113558	SKP1
-0.0738936	3.44499	28.4214	2.47943e-05	0.0294673	rDPI_15574	chr14	49586581	49586582	chr14:49586581..49586582,+	27921	+	49586581	ENST00000618786.1	ENSG00000276168.1	promoter	ENSG00000276168	RN7SL1
-0.0593585	3.87549	28.3034	2.54568e-05	0.0294673	rDPI_49819	chr8	37899492	37899503	chr8:37899492..37899503,chr8:37899360..37899540,-;peak:chr8:37899497..37899498,-;peakCounts:2202.3	3819	-	37899497	ENST00000330843.9	ENSG00000156675.16	promoter	ENSG00000156675	RAB11FIP1
-0.0662295	1.44734	28.296	2.54985e-05	0.0294673	rDPI_6595	chr10	79826410	79826421	chr10:79826410..79826421,chr10:79826343..79826435,-;peak:chr10:79826415..79826416,-;peakCounts:236.7	423	-	79826415	ENST00000488805.5	ENSG00000225484.7	alternative	ENSG00000225484	NUTM2B-AS1
-0.054284	2.6684	28.0257	2.70924e-05	0.0294673	rDPI_25861	chr19	34172436	34172447	chr19:34172436..34172447,chr19:34172407..34172750,+;peak:chr19:34172441..34172442,+;peakCounts:528	1933	+	34172441	ENST00000589878.5	ENSG00000257103.9	alternative	ENSG00000257103	LSM14A
-0.0443048	3.34083	28.0141	2.71635e-05	0.0294673	rDPI_38026	chr3	132660359	132660363	chr3:132660359..132660363,chr3:132660260..132660546,+;peak:chr3:132660359..132660360,+;peakCounts:793.7	4497	+	132660359	ENST00000473651.5	ENSG00000081307.14	alternative	ENSG00000081307	UBA5
-0.0499634	3.71615	27.9715	2.74249e-05	0.0294673	rDPI_18432	chr15	90529910	90529928	chr15:90529910..90529928,chr15:90529853..90530015,+;peak:chr15:90529923..90529924,+;peakCounts:2212.3	5713	+	90529923	ENST00000268184.11	ENSG00000140577.16	promoter	ENSG00000140577	CRTC3
0.0594961	3.08792	27.9555	2.75242e-05	0.0294673	rDPI_5538	chr10	6202932	6202934	chr10:6202932..6202934,chr10:6202904..6202986,+;peak:chr10:6202932..6202933,+;peakCounts:10373.4	12435	+	6202932	ENST00000379775.9	ENSG00000170525.21	promoter	ENSG00000170525	PFKFB3
0.0332222	2.09227	27.8163	2.84021e-05	0.0294673	rDPI_8161	chr11	9265365	9265370	chr11:9265365..9265370,chr11:9265044..9265417,-;peak:chr11:9265368..9265369,-;peakCounts:968.9	1765	-	9265368	ENST00000328194.8	ENSG00000184014.9	alternative	ENSG00000184014	DENND5A
-0.0478909	2.60984	27.7467	2.88528e-05	0.0294673	rDPI_21791	chr17	39667909	39667943	chr17:39667909..39667943,chr17:39667791..39668043,+;peak:chr17:39667914..39667915,+;peakCounts:310.4	1509	+	39667914	ENST00000394246.1	ENSG00000141744.4	promoter	ENSG00000141744	PNMT
-0.0566155	2.28112	27.6977	2.91744e-05	0.0294673	rDPI_16654	chr14	104049403	104049418	chr14:104049403..104049418,chr14:104049324..104049441,+;peak:chr14:104049408..104049409,+;peakCounts:646.7	1481	+	104049408	ENST00000462273.1	ENSG00000156414.19	promoter	ENSG00000156414	TDRD9
-0.0524627	5.49084	27.6574	2.9442e-05	0.0294673	rDPI_53673	chrX	16719635	16719642	chrX:16719635..16719642,chrX:16719545..16719784,+;peak:chrX:16719639..16719640,+;peakCounts:12028.5	20355	+	16719639	ENST00000380155.4	ENSG00000169895.6	promoter	ENSG00000169895	SYAP1
-0.0480071	3.68562	27.654	2.9465e-05	0.0294673	rDPI_29340	chr2	106194294	106194309	chr2:106194294..106194309,chr2:106194238..106194425,-;peak:chr2:106194299..106194300,-;peakCounts:1729.8	3817	-	106194299	ENST00000283148.12	ENSG00000115652.15	alternative	ENSG00000115652	UXS1
-0.0425518	2.51849	27.6504	2.94891e-05	0.0294673	rDPI_27608	chr2	3459889	3459908	chr2:3459889..3459908,chr2:3459845..3459966,+;peak:chr2:3459894..3459895,+;peakCounts:1280.7	2746	+	3459894	ENST00000461577.5	ENSG00000171853.16	promoter	ENSG00000171853	TRAPPC12
0.0538009	5.6765	27.6339	2.95998e-05	0.0294673	rDPI_4579	chr1	206684899	206684912	chr1:206684899..206684912,chr1:206684866..206685267,+;peak:chr1:206684906..206684907,+;peakCounts:20043.9	52611	+	206684906	ENST00000367103.4	ENSG00000162889.11	promoter	ENSG00000162889	MAPKAPK2
0.0375609	2.34567	27.5828	2.99444e-05	0.0294673	rDPI_4506	chr1	205504719	205504728	chr1:205504719..205504728,chr1:205504538..205504866,+;peak:chr1:205504723..205504724,+;peakCounts:1174.3	2008	+	205504723	ENST00000443813.6	ENSG00000117266.16	alternative	ENSG00000117266	CDK18
-0.0318378	2.7564	27.5054	3.04762e-05	0.0294673	rDPI_43496	chr5	167952754	167952776	chr5:167952754..167952776,chr5:167952664..167952798,+;peak:chr5:167952775..167952776,+;peakCounts:305.1	1399	+	167952775	ENST00000522488.1	ENSG00000145934.16	enhancer	ENSG00000145934	TENM2
0.0583785	2.02345	27.4228	3.10542e-05	0.0294673	rDPI_27083	chr19	50658490	50658491	chr19:50658490..50658491,chr19:50658431..50658553,+;peak:chr19:50658490..50658491,+;peakCounts:4749.3	5277	+	50658490	ENST00000490451.1	ENSG00000235034.7	promoter	ENSG00000235034	C19orf81
0.0490387	3.36275	27.3714	3.14206e-05	0.0294673	rDPI_18278	chr15	83207815	83207829	chr15:83207815..83207829,chr15:83207352..83207923,-;peak:chr15:83207823..83207824,-;peakCounts:4103.1	7074	-	83207823	ENST00000299633.7	ENSG00000166503.9	promoter	ENSG00000166503	HDGFL3
-0.0489855	3.61285	27.3479	3.15892e-05	0.0294673	rDPI_22195	chr17	46923157	46923162	chr17:46923157..46923162,chr17:46923098..46923205,+;peak:chr17:46923160..46923161,+;peakCounts:2674.7	4608	+	46923160	ENST00000638579.1	ENSG00000108433.17	alternative	ENSG00000108433	GOSR2
0.048019	2.01175	27.1353	3.31633e-05	0.0304055	rDPI_18785	chr16	2009801	2009826	chr16:2009801..2009826,-	1457	-	2009820	ENST00000652647.1	ENSG00000167962.14	promoter	ENSG00000167962	ZNF598
-0.0532471	2.93299	27.0879	3.35262e-05	0.0304055	rDPI_14837	chr14	23386075	23386085	chr14:23386075..23386085,chr14:23385926..23386141,-;peak:chr14:23386079..23386080,-;peakCounts:1382.1	3426	-	23386079	ENST00000651452.1	ENSG00000197616.13	alternative	ENSG00000197616	MYH6
-0.0572412	1.58259	27.0237	3.40243e-05	0.0304345	rDPI_44753	chr6	33275802	33275806	chr6:33275802..33275806,chr6:33275795..33275862,+;peak:chr6:33275805..33275806,+;peakCounts:1538.1	1744	+	33275805	ENST00000479802.1	ENSG00000231500.7	promoter	ENSG00000231500	RPS18
-0.0389301	4.76939	26.8926	3.50667e-05	0.0307001	rDPI_54313	chrX	73944337	73944347	chrX:73944337..73944347,chrX:73944311..73944375,+;peak:chrX:73944342..73944343,+;peakCounts:5505.3	19227	+	73944342	ENST00000602895.6	ENSG00000225470.8	promoter	ENSG00000225470	JPX
-0.0362905	2.81126	26.8144	3.57043e-05	0.0307001	rDPI_20207	chr16	71809055	71809068	chr16:71809055..71809068,chr16:71808956..71809126,-;peak:chr16:71809059..71809060,-;peakCounts:927.9	2155	-	71809059	ENST00000565161.1	ENSG00000166747.13	alternative	ENSG00000166747	AP1G1
0.0472525	1.97811	26.8111	3.57317e-05	0.0307001	rDPI_18449	chr15	90902714	90902725	chr15:90902714..90902725,chr15:90902521..90902885,+;peak:chr15:90902719..90902720,+;peakCounts:1592.3	2145	+	90902719	ENST00000560451.5	ENSG00000196547.15	alternative	ENSG00000196547	MAN2A2
-0.0514267	2.81551	26.6235	3.73166e-05	0.0314939	rDPI_3795	chr1	167722011	167722013	chr1:167722011..167722013,chr1:167721934..167722064,+;peak:chr1:167722012..167722013,+;peakCounts:1110.5	2107	+	167722012	ENST00000465787.5	ENSG00000197965.12	alternative	ENSG00000197965	MPZL1
-0.0388935	5.09901	26.5866	3.76378e-05	0.0314939	rDPI_47299	chr7	43926444	43926450	chr7:43926444..43926450,chr7:43926405..43926500,+;peak:chr7:43926448..43926449,+;peakCounts:3992.7	13260	+	43926448	ENST00000443780.5	ENSG00000078967.13	alternative	ENSG00000078967	UBE2D4
0.0487422	1.84145	26.474	3.86351e-05	0.0314939	rDPI_36090	chr3	15521731	15521757	chr3:15521731..15521757,chr3:15521632..15521830,-;peak:chr3:15521736..15521737,-;peakCounts:177.1	1360	-	15521736	ENST00000603808.5	ENSG00000206561.14	promoter	ENSG00000206561	COLQ
-0.0461284	1.22149	26.4414	3.89288e-05	0.0314939	rDPI_2893	chr1	146228996	146229002	chr1:146228996..146229002,chr1:146228943..146229002,-;peak:chr1:146229000..146229001,-;peakCounts:207	331	-	146229000	ENST00000612520.2	ENSG00000271425.9	promoter	ENSG00000271425	NBPF10
-0.0419214	1.95568	26.4208	3.91163e-05	0.0314939	rDPI_6334	chr10	70404418	70404526	chr10:70404418..70404526,chr10:70404418..70404526,+	1569	+	70404520	ENST00000373218.5	ENSG00000148730.7	alternative	ENSG00000148730	EIF4EBP2
0.0370142	3.03204	26.2755	4.04641e-05	0.0314939	rDPI_25507	chr19	16572404	16572418	chr19:16572404..16572418,chr19:16572367..16572444,-;peak:chr19:16572408..16572409,-;peakCounts:1643.4	3505	-	16572408	ENST00000595753.6	ENSG00000127526.15	promoter	ENSG00000127526	SLC35E1
-0.0660943	7.0024	26.2638	4.05752e-05	0.0314939	rDPI_53454	chrM	8930	8939	chrM:8930..8939,chrM:8828..8944,+;peak:chrM:8934..8935,+;peakCounts:16045.8	47713	+	8934	ENST00000362079.2	ENSG00000198938.2	alternative	ENSG00000198938	COX3
0.0445233	2.70651	26.253	4.06774e-05	0.0314939	rDPI_9869	chr11	75351813	75351877	chr11:75351813..75351877,chr11:75351788..75351952,-;peak:chr11:75351833..75351834,-;peakCounts:212.4	2734	-	75351833	ENST00000360025.7	ENSG00000137486.17	enhancer	ENSG00000137486	ARRB1
0.0606428	3.30758	26.2196	4.09964e-05	0.0314939	rDPI_41285	chr5	1345065	1345075	chr5:1345065..1345075,chr5:1344946..1345136,-;peak:chr5:1345070..1345071,-;peakCounts:2125.5	6018	-	1345070	ENST00000320895.10	ENSG00000049656.14	alternative	ENSG00000049656	CLPTM1L
0.0454929	1.85941	26.1506	4.16637e-05	0.0316013	rDPI_25897	chr19	35030426	35030432	chr19:35030426..35030432,chr19:35030407..35030608,+;peak:chr19:35030426..35030427,+;peakCounts:696.2	1647	+	35030426	ENST00000262631.11	ENSG00000105711.13	alternative	ENSG00000105711	SCN1B
0.0487154	3.03591	26.1058	4.21041e-05	0.0316013	rDPI_25088	chr19	10871549	10871563	chr19:10871549..10871563,chr19:10871442..10871749,+;peak:chr19:10871553..10871554,+;peakCounts:1669.1	5469	+	10871553	ENST00000327064.9	ENSG00000142453.12	promoter	ENSG00000142453	CARM1
0.0526887	4.19312	25.9346	4.38319e-05	0.0325243	rDPI_16324	chr14	90816384	90816436	chr14:90816384..90816436,chr14:90816295..90816530,-;peak:chr14:90816417..90816418,-;peakCounts:1428.3	9997	-	90816417	ENST00000328459.11	ENSG00000165914.15	promoter	ENSG00000165914	TTC7B
0.0540932	3.54684	25.8857	4.43396e-05	0.0325313	rDPI_1548	chr1	43979213	43979224	chr1:43979213..43979224,chr1:43979177..43979365,+;peak:chr1:43979218..43979219,+;peakCounts:8015.4	10234	+	43979218	ENST00000372324.6	ENSG00000117411.18	promoter	ENSG00000117411	B4GALT2
0.041673	4.2686	25.7665	4.56036e-05	0.0326187	rDPI_26461	chr19	42242594	42242615	chr19:42242594..42242615,chr19:42242505..42242712,-;peak:chr19:42242599..42242600,-;peakCounts:3299.4	12218	-	42242599	ENST00000222330.8	ENSG00000105723.13	promoter	ENSG00000105723	GSK3A
0.0620016	3.84626	25.7593	4.5681e-05	0.0326187	rDPI_53125	chr9	136546040	136546049	chr9:136546040..136546049,chr9:136545940..136546080,-;peak:chr9:136546048..136546049,-;peakCounts:4622.4	10121	-	136546048	ENST00000651671.1	ENSG00000148400.13	promoter	ENSG00000148400	NOTCH1
0.0385722	2.94415	25.7338	4.59574e-05	0.0326187	rDPI_54587	chrX	109733227	109733242	chrX:109733227..109733242,chrX:109733151..109733338,-;peak:chrX:109733234..109733235,-;peakCounts:1969	5286	-	109733234	ENST00000469857.1	ENSG00000068366.20	alternative	ENSG00000068366	ACSL4
0.0619677	5.77437	25.6443	4.69412e-05	0.0329478	rDPI_43258	chr5	150624632	150624649	chr5:150624632..150624649,chr5:150624508..150624916,+;peak:chr5:150624644..150624645,+;peakCounts:11889	44725	+	150624644	ENST00000518872.1	ENSG00000171992.13	alternative	ENSG00000171992	SYNPO
-0.042993	1.74191	25.6006	4.74302e-05	0.0329478	rDPI_8637	chr11	45286308	45286321	chr11:45286308..45286321,chr11:45286207..45286364,-;peak:chr11:45286313..45286314,-;peakCounts:109.7	328	-	45286313	ENST00000020926.8	ENSG00000019505.8	alternative	ENSG00000019505	SYT13
0.0408366	2.21848	25.4911	4.86795e-05	0.0334307	rDPI_23642	chr18	12657920	12657935	chr18:12657920..12657935,chr18:12657835..12658123,-;peak:chr18:12657924..12657925,-;peakCounts:924.9	2152	-	12657924	ENST00000410092.7	ENSG00000134278.15	alternative	ENSG00000134278	SPIRE1
0.0803965	3.39383	25.4239	4.9464e-05	0.0334307	rDPI_37227	chr3	64687999	64688002	chr3:64687999..64688002,chr3:64687908..64688055,-;peak:chr3:64688000..64688001,-;peakCounts:10503	12139	-	64688000	ENST00000498707.5	ENSG00000163638.13	promoter	ENSG00000163638	ADAMTS9
-0.0702358	3.05849	25.3559	5.02714e-05	0.0334307	rDPI_9876	chr11	75404056	75404067	chr11:75404056..75404067,chr11:75404014..75404167,+;peak:chr11:75404061..75404062,+;peakCounts:2474.1	3185	+	75404061	ENST00000384714.1	ENSG00000207445.1	not_classified	ENSG00000207445	SNORD15B
-0.0359742	5.02337	25.3544	5.02892e-05	0.0334307	rDPI_22523	chr17	57988202	57988241	chr17:57988202..57988241,chr17:57988092..57988282,-;peak:chr17:57988231..57988232,-;peakCounts:2837.7	12499	-	57988231	ENST00000581208.2	ENSG00000136451.9	promoter	ENSG00000136451	VEZF1
-0.0505173	7.99787	25.3215	5.06852e-05	0.0334307	rDPI_20289	chr16	75566371	75566381	chr16:75566371..75566381,chr16:75566334..75566518,+;peak:chr16:75566379..75566380,+;peakCounts:46550.7	133976	+	75566379	ENST00000565057.5	ENSG00000034713.8	promoter	ENSG00000034713	GABARAPL2
0.0515218	1.91466	25.2026	5.21465e-05	0.0334738	rDPI_27628	chr2	3575281	3575287	chr2:3575281..3575287,chr2:3575226..3575374,+;peak:chr2:3575281..3575282,+;peakCounts:1730.6	4221	+	3575281	ENST00000645674.2	ENSG00000171863.15	alternative	ENSG00000171863	RPS7
-0.0338492	3.61673	25.2016	5.21585e-05	0.0334738	rDPI_27970	chr2	27428657	27428661	chr2:27428657..27428661,chr2:27428576..27428729,+;peak:chr2:27428660..27428661,+;peakCounts:2467.9	6372	+	27428660	ENST00000379863.7	ENSG00000115216.14	alternative	ENSG00000115216	NRBP1
0.0420983	3.74555	25.1649	5.26194e-05	0.0334738	rDPI_35838	chr3	4979455	4979478	chr3:4979455..4979478,chr3:4979396..4979703,+;peak:chr3:4979463..4979464,+;peakCounts:4087.8	13497	+	4979463	ENST00000256495.4	ENSG00000134107.5	promoter	ENSG00000134107	BHLHE40
0.0369054	3.09143	25.1068	5.33571e-05	0.0334738	rDPI_33607	chr20	45891374	45891378	chr20:45891374..45891378,chr20:45891286..45891436,+;peak:chr20:45891377..45891378,+;peakCounts:2699	6756	+	45891377	ENST00000484855.3	ENSG00000064601.20	alternative	ENSG00000064601	CTSA
0.0955428	2.5904	25.0165	5.45249e-05	0.0334738	rDPI_3849	chr1	169734079	169734080	chr1:169734079..169734080,-	12439	-	169734079	ENST00000333360.12	ENSG00000007908.16	promoter	ENSG00000007908	SELE
-0.0367159	1.37526	24.9487	5.54214e-05	0.0334738	rDPI_28371	chr2	50347546	50347566	chr2:50347546..50347566,chr2:50347518..50347625,-;peak:chr2:50347550..50347551,-;peakCounts:49.5	150	-	50347550	ENST00000342183.9	ENSG00000179915.24	promoter	ENSG00000179915	NRXN1
0.0575968	3.06979	24.9193	5.58148e-05	0.0334738	rDPI_28194	chr2	38077298	38077299	chr2:38077298..38077299,chr2:38077250..38077302,-;peak:chr2:38077298..38077299,-;peakCounts:5179.5	5755	-	38077298	ENST00000613082.1	ENSG00000138061.12	enhancer	ENSG00000138061	CYP1B1
-0.050228	3.96235	24.8415	5.68718e-05	0.0334738	rDPI_14918	chr14	23394097	23394103	chr14:23394097..23394103,chr14:23394061..23394133,-;peak:chr14:23394099..23394100,-;peakCounts:1702.8	3866	-	23394099	ENST00000362287.2	ENSG00000199157.2	alternative	ENSG00000199157	MIR208A
-0.0435632	4.35002	24.8265	5.70777e-05	0.0334738	rDPI_18169	chr15	78299605	78299610	chr15:78299605..78299610,chr15:78299570..78299658,-;peak:chr15:78299608..78299609,-;peakCounts:2800.3	8762	-	78299608	ENST00000558311.5	ENSG00000140395.9	promoter	ENSG00000140395	WDR61
0.0362623	1.18684	24.822	5.71392e-05	0.0334738	rDPI_3220	chr1	153637554	153637557	chr1:153637554..153637557,+	1681	+	153637554	ENST00000368687.1	ENSG00000160679.13	enhancer	ENSG00000160679	CHTOP
0.0567494	3.74804	24.7789	5.77369e-05	0.0334738	rDPI_47391	chr7	44885458	44885510	chr7:44885458..44885510,chr7:44885263..44885554,-;peak:chr7:44885492..44885493,-;peakCounts:1125.9	7635	-	44885492	ENST00000395699.5	ENSG00000146676.10	promoter	ENSG00000146676	PURB
0.0431385	3.14516	24.771	5.7848e-05	0.0334738	rDPI_14049	chr13	42272018	42272052	chr13:42272018..42272052,chr13:42271981..42272220,+;peak:chr13:42272023..42272024,+;peakCounts:1493.1	5409	+	42272023	ENST00000025301.4	ENSG00000023516.9	enhancer	ENSG00000023516	AKAP11
-0.0810621	7.28065	24.689	5.9006e-05	0.0334738	rDPI_32414	chr2	231256065	231256068	chr2:231256065..231256068,+	146525	+	231256066	ENST00000441378.1	ENSG00000237039.1	promoter	ENSG00000237039	NA
-0.0425962	3.86569	24.6404	5.97043e-05	0.0334738	rDPI_13461	chr12	122078750	122078762	chr12:122078750..122078762,chr12:122078703..122078842,+;peak:chr12:122078756..122078757,+;peakCounts:1895.4	5286	+	122078756	ENST00000319080.12	ENSG00000175727.14	promoter	ENSG00000175727	MLXIP
-0.0526835	5.62613	24.6334	5.98062e-05	0.0334738	rDPI_14892	chr14	23392981	23393011	chr14:23392981..23393011,chr14:23392878..23393060,-;peak:chr14:23392986..23392987,-;peakCounts:4217.4	13539	-	23392986	ENST00000362287.2	ENSG00000199157.2	alternative	ENSG00000199157	MIR208A
-0.0588274	3.28372	24.6066	6.01961e-05	0.0334738	rDPI_12740	chr12	101680477	101680486	chr12:101680477..101680486,chr12:101680124..101680525,+;peak:chr12:101680481..101680482,+;peakCounts:1658.4	2787	+	101680481	ENST00000549608.1	ENSG00000196091.15	alternative	ENSG00000196091	MYBPC1
0.053963	4.09031	24.5923	6.04048e-05	0.0334738	rDPI_41594	chr5	40835211	40835212	chr5:40835211..40835212,chr5:40835175..40835336,-;peak:chr5:40835211..40835212,-;peakCounts:120653.1	134059	-	40835211	ENST00000509877.5	ENSG00000145592.14	promoter	ENSG00000145592	RPL37
-0.094081	2.94732	24.4993	6.17843e-05	0.0334738	rDPI_34143	chr21	8442359	8442368	chr21:8442359..8442368,chr21:8442286..8442403,+;peak:chr21:8442367..8442368,+;peakCounts:2875.5	6432	+	8442367	ENST00000619471.1	ENSG00000278189.1	not_classified	ENSG00000278189	RNA5-8SN1
0.0585679	3.93602	24.4964	6.18291e-05	0.0334738	rDPI_5792	chr10	22714548	22714588	chr10:22714548..22714588,chr10:22714331..22714631,-;peak:chr10:22714574..22714575,-;peakCounts:932.7	5717	-	22714574	ENST00000376573.9	ENSG00000150867.14	alternative	ENSG00000150867	PIP4K2A
-0.0495315	1.45567	24.4782	6.21022e-05	0.0334738	rDPI_50545	chr8	102108046	102108084	chr8:102108046..102108084,-	404	-	102108083	ENST00000517531.5	ENSG00000104490.18	enhancer	ENSG00000104490	NCALD
-0.0492377	1.39479	24.4751	6.21504e-05	0.0334738	rDPI_16924	chr15	34210075	34210081	chr15:34210075..34210081,chr15:34209976..34210147,-;peak:chr15:34210077..34210078,-;peakCounts:239	646	-	34210077	ENST00000560108.5	ENSG00000134152.11	alternative	ENSG00000134152	KATNBL1
-0.0487389	3.36591	24.4611	6.23611e-05	0.0334738	rDPI_52861	chr9	129111410	129111419	chr9:129111410..129111419,chr9:129111308..129111440,+;peak:chr9:129111418..129111419,+;peakCounts:1159.8	3590	+	129111418	ENST00000337738.6	ENSG00000119383.21	alternative	ENSG00000119383	PTPA
-0.0462496	2.98888	24.3885	6.34743e-05	0.0334738	rDPI_18064	chr15	74956768	74956772	chr15:74956768..74956772,chr15:74956723..74956826,-;peak:chr15:74956769..74956770,-;peakCounts:1597.5	2440	-	74956769	ENST00000322177.6	ENSG00000178718.7	promoter	ENSG00000178718	RPP25
-0.048329	3.77666	24.3257	6.44539e-05	0.0334738	rDPI_10205	chr11	110430161	110430173	chr11:110430161..110430173,chr11:110429855..110430297,+;peak:chr11:110430166..110430167,+;peakCounts:2784.8	6896	+	110430166	ENST00000260270.3	ENSG00000137714.3	alternative	ENSG00000137714	FDX1
0.0380709	1.98442	24.2492	6.56692e-05	0.0334738	rDPI_46747	chr7	2844351	2844354	chr7:2844351..2844354,chr7:2844137..2844375,-;peak:chr7:2844353..2844354,-;peakCounts:1322	1794	-	2844353	ENST00000275364.8	ENSG00000146535.14	alternative	ENSG00000146535	GNA12
-0.0815229	2.78398	24.2111	6.62852e-05	0.0334738	rDPI_34138	chr21	8441144	8441152	chr21:8441144..8441152,chr21:8441137..8441207,+;peak:chr21:8441146..8441147,+;peakCounts:3741.3	9221	+	8441146	ENST00000619471.1	ENSG00000278189.1	promoter	ENSG00000278189	RNA5-8SN1
-0.237383	7.70086	24.2015	6.64408e-05	0.0334738	rDPI_29700	chr2	148881819	148881820	chr2:148881819..148881820,chr2:148881760..148881833,-;peak:chr2:148881819..148881820,-;peakCounts:562468.5	624965	-	148881819	ENST00000608822.1	ENSG00000231079.7	enhancer	ENSG00000231079	NA
-0.0335464	6.97417	24.1817	6.67639e-05	0.0334738	rDPI_4618	chr1	207911091	207911140	chr1:207911091..207911140,chr1:207911014..207911404,-;peak:chr1:207911115..207911116,-;peakCounts:6224.4	46089	-	207911115	ENST00000310833.12	ENSG00000174059.17	promoter	ENSG00000174059	CD34
-0.0350081	2.95541	24.1158	6.78505e-05	0.0334738	rDPI_34425	chr21	37366785	37366799	chr21:37366785..37366799,chr21:37366735..37367305,+;peak:chr21:37366793..37366794,+;peakCounts:716.5	3350	+	37366793	ENST00000647188.2	ENSG00000157540.22	alternative	ENSG00000157540	DYRK1A
0.0578412	2.27004	24.0657	6.86905e-05	0.0334738	rDPI_428	chr1	11847699	11847726	chr1:11847699..11847726,chr1:11847560..11847741,+;peak:chr1:11847711..11847712,+;peakCounts:174.6	853	+	11847711	ENST00000617059.1	ENSG00000275915.1	alternative	ENSG00000275915	NA
0.0511987	2.68195	24.0321	6.92599e-05	0.0334738	rDPI_3310	chr1	154558634	154558641	chr1:154558634..154558641,chr1:154558614..154558821,-;peak:chr1:154558634..154558635,-;peakCounts:1775.6	3551	-	154558634	ENST00000292211.5	ENSG00000160714.10	alternative	ENSG00000160714	UBE2Q1
0.0377001	1.86067	23.9987	6.98299e-05	0.0334738	rDPI_53202	chr9	136992431	136992436	chr9:136992431..136992436,chr9:136992383..136992540,+;peak:chr9:136992434..136992435,+;peakCounts:1339	1768	+	136992434	ENST00000481187.5	ENSG00000148362.11	alternative	ENSG00000148362	PAXX
-0.0498406	1.41787	23.9967	6.98645e-05	0.0334738	rDPI_42912	chr5	138753273	138753286	chr5:138753273..138753286,chr5:138753231..138753347,-;peak:chr5:138753282..138753283,-;peakCounts:67.3	182	-	138753282	ENST00000520838.1	ENSG00000253404.1	promoter	ENSG00000253404	LOC105379194
0.0237206	5.91114	23.9632	7.04426e-05	0.0334738	rDPI_54346	chrX	77895421	77895440	chrX:77895421..77895440,chrX:77895359..77895615,-;peak:chrX:77895431..77895432,-;peakCounts:7861.5	34472	-	77895431	ENST00000618282.5	ENSG00000102158.20	promoter	ENSG00000102158	MAGT1
-0.0359799	2.48122	23.9473	7.07187e-05	0.0334738	rDPI_20832	chr17	5111948	5111968	chr17:5111948..5111968,chr17:5111914..5112048,+;peak:chr17:5111952..5111953,+;peakCounts:633.6	2057	+	5111952	ENST00000665679.1	ENSG00000234327.8	promoter	ENSG00000234327	ZNF232-AS1
-0.0458788	3.48491	23.9312	7.10001e-05	0.0334738	rDPI_54267	chrX	71283632	71283639	chrX:71283632..71283639,chrX:71283583..71283704,+;peak:chrX:71283635..71283636,+;peakCounts:2780.8	3811	+	71283635	ENST00000373841.5	ENSG00000147140.17	alternative	ENSG00000147140	NONO
0.0480549	2.19961	23.8593	7.22703e-05	0.0334738	rDPI_33100	chr20	25390787	25390791	chr20:25390787..25390791,chr20:25390705..25390912,-;peak:chr20:25390789..25390790,-;peakCounts:613.1	2384	-	25390789	ENST00000461204.1	ENSG00000100997.20	alternative	ENSG00000100997	ABHD12
-0.0399862	3.06595	23.8483	7.24665e-05	0.0334738	rDPI_2229	chr1	87331720	87331736	chr1:87331720..87331736,chr1:87331654..87331799,+;peak:chr1:87331732..87331733,+;peakCounts:741.5	2357	+	87331732	ENST00000489303.1	ENSG00000143013.13	promoter	ENSG00000143013	LMO4
-0.0563837	2.51317	23.8383	7.26449e-05	0.0334738	rDPI_21153	chr17	10114532	10114541	chr17:10114532..10114541,chr17:10114473..10114595,-;peak:chr17:10114535..10114536,-;peakCounts:1045.8	2140	-	10114535	ENST00000323816.8	ENSG00000007237.19	promoter	ENSG00000007237	GAS7
0.0339251	2.25146	23.8194	7.29856e-05	0.0334738	rDPI_16389	chr14	93115923	93115926	chr14:93115923..93115926,chr14:93115770..93115943,-;peak:chr14:93115925..93115926,-;peakCounts:1763.1	2902	-	93115925	ENST00000267615.11	ENSG00000100605.17	alternative	ENSG00000100605	ITPK1
0.0443628	3.42571	23.7388	7.4453e-05	0.0334738	rDPI_13641	chr12	132144308	132144323	chr12:132144308..132144323,chr12:132144300..132144382,-;peak:chr12:132144312..132144313,-;peakCounts:2485.8	5409	-	132144312	ENST00000397333.4	ENSG00000185163.10	promoter	ENSG00000185163	DDX51
-0.0480799	3.935	23.7087	7.50109e-05	0.0334738	rDPI_49919	chr8	42051987	42051991	chr8:42051987..42051991,chr8:42051961..42052027,-;peak:chr8:42051987..42051988,-;peakCounts:3410.1	4035	-	42051987	ENST00000265713.8	ENSG00000083168.11	promoter	ENSG00000083168	KAT6A
-0.0420148	4.89623	23.7063	7.50543e-05	0.0334738	rDPI_10116	chr11	102452725	102452730	chr11:102452725..102452730,chr11:102452522..102452872,-;peak:chr11:102452725..102452726,-;peakCounts:4902.5	9734	-	102452725	ENST00000398136.7	ENSG00000152558.15	alternative	ENSG00000152558	TMEM123
-0.0729117	2.09352	23.6788	7.55687e-05	0.0334738	rDPI_46624	chr6	170535274	170535406	chr6:170535274..170535406,chr6:170535274..170535406,-	915	-	170535274	ENST00000462957.1	ENSG00000008018.9	enhancer	ENSG00000008018	PSMB1
-0.0567654	7.79732	23.6391	7.6315e-05	0.0334738	rDPI_6333	chr10	70404136	70404158	chr10:70404136..70404158,chr10:70404066..70404313,+;peak:chr10:70404145..70404146,+;peakCounts:32917.5	87628	+	70404145	ENST00000373218.5	ENSG00000148730.7	promoter	ENSG00000148730	EIF4EBP2
0.0330838	1.80576	23.6326	7.6439e-05	0.0334738	rDPI_3531	chr1	157045868	157045874	chr1:157045868..157045874,chr1:157045624..157045911,-;peak:chr1:157045871..157045872,-;peakCounts:424	1180	-	157045871	ENST00000368194.8	ENSG00000132694.19	alternative	ENSG00000132694	ARHGEF11
0.0516881	5.53421	23.6325	7.64408e-05	0.0334738	rDPI_23550	chr18	8609430	8609443	chr18:8609430..8609443,chr18:8609371..8609952,+;peak:chr18:8609437..8609438,+;peakCounts:10907.1	35841	+	8609437	ENST00000649141.1	ENSG00000206418.4	promoter	ENSG00000206418	RAB12
-0.0447652	2.65451	23.6241	7.66e-05	0.0334738	rDPI_28914	chr2	74458457	74458464	chr2:74458457..74458464,chr2:74458405..74458527,+;peak:chr2:74458460..74458461,+;peakCounts:4056.3	5571	+	74458460	ENST00000484744.5	ENSG00000239779.7	alternative	ENSG00000239779	WBP1
-0.0521998	2.54004	23.6117	7.68359e-05	0.0334738	rDPI_54933	chrX	149505289	149505295	chrX:149505289..149505295,chrX:149505049..149505373,-;peak:chrX:149505291..149505292,-;peakCounts:524.3	1203	-	149505291	ENST00000428056.6	ENSG00000010404.18	alternative	ENSG00000010404	IDS
0.0474115	1.68902	23.6005	7.70505e-05	0.0334738	rDPI_51199	chr9	2622153	2622161	chr9:2622153..2622161,chr9:2622092..2622295,+;peak:chr9:2622157..2622158,+;peakCounts:2165.4	3301	+	2622157	ENST00000680243.1	ENSG00000147852.17	alternative	ENSG00000147852	VLDLR
0.0320513	4.81932	23.5202	7.86018e-05	0.0334738	rDPI_12673	chr12	95474148	95474161	chr12:95474148..95474161,chr12:95474058..95474322,+;peak:chr12:95474155..95474156,+;peakCounts:7615.8	17454	+	95474155	ENST00000261220.13	ENSG00000111142.14	alternative	ENSG00000111142	METAP2
0.0479254	2.4501	23.4907	7.91818e-05	0.0334738	rDPI_18812	chr16	2214839	2214841	chr16:2214839..2214841,chr16:2214592..2214865,-;peak:chr16:2214840..2214841,-;peakCounts:1848.9	3334	-	2214840	ENST00000333503.8	ENSG00000184207.9	alternative	ENSG00000184207	PGP
-0.0481304	3.8761	23.4805	7.93833e-05	0.0334738	rDPI_6171	chr10	59906485	59906501	chr10:59906485..59906501,chr10:59906376..59906623,-;peak:chr10:59906494..59906495,-;peakCounts:1528.8	4331	-	59906494	ENST00000263102.7	ENSG00000108091.11	alternative	ENSG00000108091	CCDC6
-0.0542996	1.92807	23.4043	8.09052e-05	0.0334738	rDPI_48566	chr7	123663996	123664008	chr7:123663996..123664008,chr7:123663715..123664110,+;peak:chr7:123664001..123664002,+;peakCounts:1487.7	2488	+	123664001	ENST00000456238.2	ENSG00000170807.12	enhancer	ENSG00000170807	LMOD2
-0.0431015	1.40569	23.4023	8.09444e-05	0.0334738	rDPI_24462	chr19	1440073	1440088	chr19:1440073..1440088,chr19:1440073..1440148,+;peak:chr19:1440082..1440083,+;peakCounts:271.7	944	+	1440082	ENST00000594262.1	ENSG00000268798.1	not_classified	ENSG00000268798	NA
-0.107693	7.77757	23.3992	8.10082e-05	0.0334738	rDPI_22005	chr17	42998419	42998444	chr17:42998419..42998444,chr17:42998378..42998558,+;peak:chr17:42998439..42998440,+;peakCounts:15446.7	72676	+	42998439	ENST00000587478.1	ENSG00000131469.15	promoter	ENSG00000131469	RPL27
-0.0329191	4.38569	23.3902	8.11898e-05	0.0334738	rDPI_41778	chr5	57174057	57174066	chr5:57174057..57174066,chr5:57173996..57174192,+;peak:chr5:57174059..57174060,+;peakCounts:3846.2	11539	+	57174059	ENST00000506184.7	ENSG00000062194.16	alternative	ENSG00000062194	GPBP1
0.0455861	1.34041	23.3714	8.15701e-05	0.0334738	rDPI_34048	chr21	5154682	5154701	chr21:5154682..5154701,chr21:5154657..5154715,-;peak:chr21:5154692..5154693,-;peakCounts:122.4	526	-	5154692	ENST00000617716.4	ENSG00000275464.5	promoter	ENSG00000275464	LOC102724159
-0.0334001	3.46557	23.3673	8.16552e-05	0.0334738	rDPI_50848	chr8	140511397	140511434	chr8:140511397..140511434,chr8:140511267..140511517,+;peak:chr8:140511419..140511420,+;peakCounts:1730.7	5313	+	140511419	ENST00000220913.10	ENSG00000104472.10	alternative	ENSG00000104472	CHRAC1
0.0926914	4.74783	23.3234	8.25551e-05	0.0334738	rDPI_40050	chr4	87975713	87975715	chr4:87975713..87975715,chr4:87975648..87975825,+;peak:chr4:87975714..87975715,+;peakCounts:35838.9	44289	+	87975714	ENST00000504310.5	ENSG00000118785.14	promoter	ENSG00000118785	SPP1
-0.0437188	4.98532	23.3134	8.27615e-05	0.0334738	rDPI_47886	chr7	90211853	90211908	chr7:90211853..90211908,chr7:90211695..90211977,+;peak:chr7:90211886..90211887,+;peakCounts:1559.7	10231	+	90211886	ENST00000394622.6	ENSG00000157214.14	promoter	ENSG00000157214	STEAP2
-0.0464681	2.39657	23.2873	8.33026e-05	0.0334738	rDPI_29	chr1	634048	634054	chr1:634048..634054,chr1:634029..634104,-;peak:chr1:634048..634049,-;peakCounts:1017.9	1320	-	634048	ENST00000440196.3	ENSG00000230021.10	alternative	ENSG00000230021	LOC101928626
0.0253701	3.589	23.2751	8.35582e-05	0.0334738	rDPI_1925	chr1	65148172	65148188	chr1:65148172..65148188,chr1:65147760..65148215,+;peak:chr1:65148184..65148185,+;peakCounts:3616.6	16105	+	65148184	ENST00000327299.8	ENSG00000162433.15	alternative	ENSG00000162433	AK4
0.0444945	3.76542	23.275	8.35589e-05	0.0334738	rDPI_23413	chr17	83079609	83079610	chr17:83079609..83079610,chr17:83079552..83079700,+;peak:chr17:83079609..83079610,+;peakCounts:33847.2	37608	+	83079609	ENST00000320095.12	ENSG00000176845.13	promoter	ENSG00000176845	METRNL
0.034846	3.84515	23.1781	8.56122e-05	0.0340872	rDPI_1926	chr1	65148198	65148204	chr1:65148198..65148204,chr1:65147760..65148215,+;peak:chr1:65148203..65148204,+;peakCounts:12972.6	17697	+	65148203	ENST00000327299.8	ENSG00000162433.15	promoter	ENSG00000162433	AK4
0.0368401	2.01737	23.1397	8.64416e-05	0.0341988	rDPI_13803	chr13	27171861	27171866	chr13:27171861..27171866,chr13:27171732..27172072,-;peak:chr13:27171865..27171866,-;peakCounts:969.8	1880	-	27171865	ENST00000282344.11	ENSG00000152484.14	alternative	ENSG00000152484	USP12
0.0395961	2.60201	23.1168	8.69399e-05	0.0341988	rDPI_20613	chr17	1562750	1562757	chr17:1562750..1562757,chr17:1562562..1562868,-;peak:chr17:1562753..1562754,-;peakCounts:1344.3	2702	-	1562753	ENST00000575288.5	ENSG00000174238.15	alternative	ENSG00000174238	PITPNA
0.0612953	3.36643	22.9958	8.96258e-05	0.0344397	rDPI_38913	chr3	196082089	196082090	chr3:196082089..196082090,chr3:196082045..196082170,-;peak:chr3:196082089..196082090,-;peakCounts:32605.2	36228	-	196082089	ENST00000360110.9	ENSG00000072274.13	promoter	ENSG00000072274	TFRC
0.0587642	3.76845	22.993	8.9689e-05	0.0344397	rDPI_20014	chr16	67029099	67029133	chr16:67029099..67029133,chr16:67029075..67029494,+;peak:chr16:67029108..67029109,+;peakCounts:2360.7	8739	+	67029108	ENST00000561924.6	ENSG00000067955.15	promoter	ENSG00000067955	CBFB
0.0716325	3.50621	22.9874	8.98142e-05	0.0344397	rDPI_26365	chr19	40717107	40717113	chr19:40717107..40717113,chr19:40716961..40717409,+;peak:chr19:40717112..40717113,+;peakCounts:5639.4	6953	+	40717112	ENST00000263370.3	ENSG00000086544.3	promoter	ENSG00000086544	ITPKC
-0.056053	3.18991	22.975	9.00948e-05	0.0344397	rDPI_14920	chr14	23394160	23394166	chr14:23394160..23394166,chr14:23394156..23394296,-;peak:chr14:23394160..23394161,-;peakCounts:219.7	1978	-	23394160	ENST00000362287.2	ENSG00000199157.2	alternative	ENSG00000199157	MIR208A
0.0473971	1.86753	22.9709	9.01893e-05	0.0344397	rDPI_39372	chr4	25862961	25863050	chr4:25862961..25863050,chr4:25862961..25863050,-	1762	-	25862988	ENST00000399878.8	ENSG00000091490.11	promoter	ENSG00000091490	SEL1L3
-0.0620079	4.74779	22.9469	9.07358e-05	0.0344469	rDPI_36565	chr3	45026374	45026380	chr3:45026374..45026380,chr3:45026126..45026469,+;peak:chr3:45026379..45026380,+;peakCounts:2978.2	8245	+	45026379	ENST00000296130.5	ENSG00000163815.6	alternative	ENSG00000163815	CLEC3B
-0.0718423	3.5496	22.9178	9.1405e-05	0.0345004	rDPI_12739	chr12	101680447	101680458	chr12:101680447..101680458,chr12:101680124..101680525,+;peak:chr12:101680452..101680453,+;peakCounts:1724.4	3065	+	101680452	ENST00000549608.1	ENSG00000196091.15	alternative	ENSG00000196091	MYBPC1
0.0360289	3.82489	22.873	9.24445e-05	0.0346922	rDPI_53729	chrX	20267010	20267052	chrX:20267010..20267052,chrX:20266840..20267113,-;peak:chrX:20267022..20267023,-;peakCounts:2136.6	11983	-	20267022	ENST00000644893.1	ENSG00000177189.14	alternative	ENSG00000177189	RPS6KA3
-0.0904271	5.36421	22.8337	9.33661e-05	0.0348378	rDPI_53535	chrM	15592	15603	chrM:15592..15603,chrM:12258..15856,+;peak:chrM:15597..15598,+;peakCounts:2757.3	26137	+	15597	ENST00000387460.2	ENSG00000210195.2	alternative	ENSG00000210195	NA
0.0467482	4.7267	22.7921	9.43532e-05	0.0350061	rDPI_44728	chr6	33073645	33073655	chr6:33073645..33073655,chr6:33073584..33073696,-;peak:chr6:33073649..33073650,-;peakCounts:13275.9	17048	-	33073649	ENST00000463066.1	ENSG00000231389.7	promoter	ENSG00000231389	HLA-DPA1
0.168816	4.5401	22.7255	9.59588e-05	0.0351077	rDPI_457	chr1	11933696	11933700	chr1:11933696..11933700,-	6709	-	11933697	ENST00000376576.3	ENSG00000116685.16	promoter	ENSG00000116685	KIAA2013
-0.0369964	2.20003	22.7246	9.59803e-05	0.0351077	rDPI_43975	chr6	5260932	5260935	chr6:5260932..5260935,chr6:5260869..5260990,-;peak:chr6:5260933..5260934,-;peakCounts:1094.8	1482	-	5260933	ENST00000330636.9	ENSG00000214113.11	alternative	ENSG00000214113	LYRM4
-0.0475013	2.95378	22.7017	9.65388e-05	0.0351077	rDPI_14913	chr14	23393784	23393789	chr14:23393784..23393789,chr14:23393670..23393912,-;peak:chr14:23393787..23393788,-;peakCounts:531.2	1803	-	23393787	ENST00000362287.2	ENSG00000199157.2	alternative	ENSG00000199157	MIR208A
-0.101631	4.09646	22.692	9.67777e-05	0.0351077	rDPI_50442	chr8	97066076	97066093	chr8:97066076..97066093,chr8:97065932..97066126,+;peak:chr8:97066087..97066088,+;peakCounts:3197.7	6988	+	97066087	ENST00000529551.1	ENSG00000104324.16	enhancer	ENSG00000104324	CPQ
-0.0450875	2.80595	22.6417	9.80199e-05	0.0351744	rDPI_15031	chr14	23407763	23407781	chr14:23407763..23407781,chr14:23407639..23407867,-;peak:chr14:23407775..23407776,-;peakCounts:563.4	1260	-	23407775	ENST00000557461.2	ENSG00000197616.13	alternative	ENSG00000197616	MYH6
-0.0467857	2.62522	22.641	9.8039e-05	0.0351744	rDPI_18185	chr15	78811355	78811361	chr15:78811355..78811361,chr15:78811332..78811525,-;peak:chr15:78811355..78811356,-;peakCounts:1195.9	1394	-	78811355	ENST00000566303.5	ENSG00000136378.15	alternative	ENSG00000136378	ADAMTS7
-0.037917	1.28568	22.6083	9.88555e-05	0.0352075	rDPI_44957	chr6	37044952	37044958	chr6:37044952..37044958,chr6:37044892..37044959,+;peak:chr6:37044957..37044958,+;peakCounts:400.5	468	+	37044957	ENST00000620597.2	ENSG00000226976.3	alternative	ENSG00000226976	NA
-0.0298366	1.59634	22.5943	9.92095e-05	0.0352075	rDPI_34455	chr21	39387790	39387794	chr21:39387790..39387794,chr21:39387752..39387822,+;peak:chr21:39387793..39387794,+;peakCounts:381.6	574	+	39387793	ENST00000466787.1	ENSG00000182093.16	promoter	ENSG00000182093	GET1
0.0382997	1.92948	22.5504	0.000100323	0.0352316	rDPI_52699	chr9	127569127	127569133	chr9:127569127..127569133,chr9:127568843..127569167,-;peak:chr9:127569132..127569133,-;peakCounts:853.9	1390	-	127569132	ENST00000484348.2	ENSG00000136830.12	alternative	ENSG00000136830	NIBAN2
-0.0578356	4.07164	22.5448	0.000100466	0.0352316	rDPI_18094	chr15	75712843	75712849	chr15:75712843..75712849,chr15:75712766..75712897,-;peak:chr15:75712848..75712849,-;peakCounts:3465	4535	-	75712848	ENST00000308508.5	ENSG00000173546.7	promoter	ENSG00000173546	CSPG4
-0.0556374	3.9879	22.5146	0.00010124	0.0352316	rDPI_27387	chr19	55675249	55675252	chr19:55675249..55675252,chr19:55675112..55675397,+;peak:chr19:55675250..55675251,+;peakCounts:1256.7	7570	+	55675250	ENST00000085079.11	ENSG00000063245.15	alternative	ENSG00000063245	EPN1
0.0495009	5.23044	22.5071	0.000101436	0.0352316	rDPI_16591	chr14	103057533	103057578	chr14:103057533..103057578,chr14:103057191..103057670,-;peak:chr14:103057549..103057550,-;peakCounts:3771.9	25394	-	103057549	ENST00000361246.7	ENSG00000198752.11	promoter	ENSG00000198752	CDC42BPB
-0.0428083	1.97232	22.4546	0.000102801	0.0355171	rDPI_32039	chr2	216672559	216672582	chr2:216672559..216672582,chr2:216672540..216672754,-;peak:chr2:216672564..216672565,-;peakCounts:174.6	538	-	216672564	ENST00000486341.1	ENSG00000115461.5	alternative	ENSG00000115461	IGFBP5
0.0377361	2.62247	22.3985	0.000104283	0.0358395	rDPI_41193	chr4	186144828	186144849	chr4:186144828..186144849,chr4:186144780..186144967,+;peak:chr4:186144834..186144835,+;peakCounts:540.9	2604	+	186144834	ENST00000227065.8	ENSG00000109794.13	promoter	ENSG00000109794	FAM149A
-0.0538017	1.61587	22.3037	0.000106845	0.0358637	rDPI_6278	chr10	68632342	68632343	chr10:68632342..68632343,chr10:68632333..68632411,+;peak:chr10:68632342..68632343,+;peakCounts:875.2	1717	+	68632342	ENST00000366529.4	ENSG00000213025.2	alternative	ENSG00000213025	NA
0.0369847	3.53481	22.2806	0.000107478	0.0358637	rDPI_37814	chr3	124887355	124887371	chr3:124887355..124887371,chr3:124887132..124887690,-;peak:chr3:124887365..124887366,-;peakCounts:6718.5	10974	-	124887365	ENST00000296181.9	ENSG00000082781.12	promoter	ENSG00000082781	ITGB5
-0.0361686	2.5012	22.2785	0.000107536	0.0358637	rDPI_603	chr1	16352440	16352446	chr1:16352440..16352446,chr1:16352342..16352521,-;peak:chr1:16352444..16352445,-;peakCounts:868.6	1779	-	16352444	ENST00000375592.8	ENSG00000037637.11	alternative	ENSG00000037637	FBXO42
-0.0407434	4.62769	22.2621	0.000107989	0.0358637	rDPI_14835	chr14	23386049	23386066	chr14:23386049..23386066,chr14:23385926..23386141,-;peak:chr14:23386054..23386055,-;peakCounts:3095.1	6874	-	23386054	ENST00000651452.1	ENSG00000197616.13	alternative	ENSG00000197616	MYH6
-0.0633356	2.61895	22.2565	0.000108143	0.0358637	rDPI_6430	chr10	72954836	72954852	chr10:72954836..72954852,chr10:72954781..72954893,-;peak:chr10:72954845..72954846,-;peakCounts:218.7	628	-	72954845	ENST00000373032.4	ENSG00000138308.6	promoter	ENSG00000138308	PLA2G12B
0.0470657	5.49685	22.2531	0.000108239	0.0358637	rDPI_13302	chr12	118061156	118061191	chr12:118061156..118061191,chr12:118061047..118061216,-;peak:chr12:118061179..118061180,-;peakCounts:4368.6	29118	-	118061179	ENST00000315436.8	ENSG00000176871.9	promoter	ENSG00000176871	WSB2
-0.06715	4.37316	22.2291	0.000108907	0.0358637	rDPI_12741	chr12	101680491	101680510	chr12:101680491..101680510,chr12:101680124..101680525,+;peak:chr12:101680502..101680503,+;peakCounts:2336.4	6209	+	101680502	ENST00000549608.1	ENSG00000196091.15	enhancer	ENSG00000196091	MYBPC1
0.106229	3.96569	22.2197	0.000109169	0.0358637	rDPI_25655	chr19	18791305	18791309	chr19:18791305..18791309,-	5859	-	18791305	ENST00000222271.7	ENSG00000105664.11	promoter	ENSG00000105664	COMP
0.0429092	3.81228	22.1714	0.00011053	0.0358637	rDPI_9483	chr11	65919034	65919043	chr11:65919034..65919043,chr11:65918942..65919140,-;peak:chr11:65919034..65919035,-;peakCounts:2890.8	7076	-	65919034	ENST00000449692.3	ENSG00000175573.7	promoter	ENSG00000175573	C11orf68
-0.0359492	2.9562	22.1714	0.000110532	0.0358637	rDPI_8288	chr11	13277797	13277819	chr11:13277797..13277819,chr11:13277717..13277875,+;peak:chr11:13277814..13277815,+;peakCounts:531.4	2732	+	13277814	ENST00000389707.8	ENSG00000133794.20	alternative	ENSG00000133794	ARNTL
-0.0488626	4.53641	22.1572	0.000110934	0.0358637	rDPI_51521	chr9	35072598	35072603	chr9:35072598..35072603,chr9:35072302..35072751,-;peak:chr9:35072598..35072599,-;peakCounts:666.4	9297	-	35072598	ENST00000677257.1	ENSG00000165280.18	alternative	ENSG00000165280	VCP
0.0576229	1.81386	22.1569	0.000110945	0.0358637	rDPI_24943	chr19	8364154	8364158	chr19:8364154..8364158,chr19:8364116..8364185,+;peak:chr19:8364156..8364157,+;peakCounts:1127.7	2069	+	8364156	ENST00000301455.7	ENSG00000167772.12	promoter	ENSG00000167772	ANGPTL4
-0.0427459	3.35914	22.1311	0.000111681	0.0359238	rDPI_44005	chr6	7541373	7541394	chr6:7541373..7541394,chr6:7541265..7541488,-;peak:chr6:7541384..7541385,-;peakCounts:1125.9	3712	-	7541384	ENST00000561592.1	ENSG00000261189.1	promoter	ENSG00000261189	NA
-0.0274623	5.37358	22.096	0.000112696	0.0360726	rDPI_8102	chr11	6603792	6603800	chr11:6603792..6603800,chr11:6603661..6603835,+;peak:chr11:6603796..6603797,+;peakCounts:14899.5	27130	+	6603796	ENST00000534565.1	ENSG00000166333.14	alternative	ENSG00000166333	ILK
0.0584594	3.61457	22.0626	0.000113667	0.0362059	rDPI_11662	chr12	48789033	48789049	chr12:48789033..48789049,chr12:48788881..48789132,-;peak:chr12:48789043..48789044,-;peakCounts:1843.6	8759	-	48789043	ENST00000550422.5	ENSG00000174233.12	alternative	ENSG00000174233	ADCY6
0.0450394	4.69526	21.9908	0.000115793	0.0364531	rDPI_48460	chr7	116499647	116499657	chr7:116499647..116499657,chr7:116499382..116499951,+;peak:chr7:116499652..116499653,+;peakCounts:6725.9	13574	+	116499652	ENST00000222693.5	ENSG00000105971.15	alternative	ENSG00000105971	CAV2
-0.0535509	4.71781	21.9675	0.000116489	0.0364531	rDPI_17771	chr15	65067961	65067969	chr15:65067961..65067969,chr15:65067741..65068072,-;peak:chr15:65067965..65067966,-;peakCounts:1791.3	4385	-	65067965	ENST00000421977.7	ENSG00000103710.11	alternative	ENSG00000103710	RASL12
0.0757335	6.59926	21.9641	0.000116591	0.0364531	rDPI_6020	chr10	44978809	44978812	chr10:44978809..44978812,-	46357	-	44978809	ENST00000298295.4	ENSG00000165507.9	promoter	ENSG00000165507	DEPP1
0.0335539	3.00704	21.8929	0.000118757	0.0364531	rDPI_14565	chr13	112690194	112690200	chr13:112690194..112690200,chr13:112689955..112690436,+;peak:chr13:112690199..112690200,+;peakCounts:1584.4	5205	+	112690199	ENST00000375630.6	ENSG00000068650.18	alternative	ENSG00000068650	ATP11A
0.0550696	2.67195	21.861	0.000119742	0.0364531	rDPI_7304	chr10	103855545	103855553	chr10:103855545..103855553,chr10:103855499..103855580,-;peak:chr10:103855547..103855548,-;peakCounts:2800.8	4898	-	103855547	ENST00000369774.8	ENSG00000107957.16	promoter	ENSG00000107957	SH3PXD2A
0.0451636	2.67683	21.8551	0.000119924	0.0364531	rDPI_25898	chr19	35030441	35030452	chr19:35030441..35030452,chr19:35030407..35030608,+;peak:chr19:35030447..35030448,+;peakCounts:444.2	3514	+	35030447	ENST00000262631.11	ENSG00000105711.13	alternative	ENSG00000105711	SCN1B
-0.0602726	3.34572	21.8352	0.000120545	0.0364531	rDPI_12738	chr12	101680424	101680434	chr12:101680424..101680434,chr12:101680124..101680525,+;peak:chr12:101680429..101680430,+;peakCounts:1459.4	2439	+	101680429	ENST00000549608.1	ENSG00000196091.15	alternative	ENSG00000196091	MYBPC1
0.0356998	1.69042	21.8324	0.000120632	0.0364531	rDPI_23646	chr18	12658040	12658049	chr18:12658040..12658049,chr18:12657835..12658123,-;peak:chr18:12658044..12658045,-;peakCounts:750.9	1403	-	12658044	ENST00000410092.7	ENSG00000134278.15	alternative	ENSG00000134278	SPIRE1
-0.0351401	1.9424	21.7849	0.000122126	0.0364531	rDPI_27607	chr2	3459879	3459888	chr2:3459879..3459888,chr2:3459845..3459966,+;peak:chr2:3459882..3459883,+;peakCounts:901.7	1483	+	3459882	ENST00000461577.5	ENSG00000171853.16	alternative	ENSG00000171853	TRAPPC12
-0.0702958	9.18053	21.7787	0.000122321	0.0364531	rDPI_24701	chr19	3985385	3985493	chr19:3985385..3985493,chr19:3985385..3985493,-	215817	-	3985463	ENST00000309311.7	ENSG00000167658.16	promoter	ENSG00000167658	EEF2
-0.0603201	5.96111	21.773	0.000122502	0.0364531	rDPI_40769	chr4	151099628	151099629	chr4:151099628..151099629,chr4:151099563..151099660,+;peak:chr4:151099628..151099629,+;peakCounts:47124.9	52361	+	151099628	ENST00000505243.5	ENSG00000145425.10	promoter	ENSG00000145425	RPS3A
0.0317428	5.74705	21.7655	0.000122741	0.0364531	rDPI_6271	chr10	68499487	68499496	chr10:68499487..68499496,+	25858	+	68499489	ENST00000414397.1	ENSG00000226493.1	promoter	ENSG00000226493	RPL26P27
-0.0312448	1.56305	21.761	0.000122886	0.0364531	rDPI_32788	chr20	3173547	3173552	chr20:3173547..3173552,chr20:3173522..3173622,-;peak:chr20:3173549..3173550,-;peakCounts:185.5	427	-	3173549	ENST00000360342.7	ENSG00000088899.15	alternative	ENSG00000088899	LZTS3
-0.0686388	2.85846	21.7476	0.000123312	0.0364531	rDPI_22030	chr17	43315916	43315917	chr17:43315916..43315917,+	2420	+	43315916	ENST00000320033.5	ENSG00000175906.5	enhancer	ENSG00000175906	ARL4D
-0.0352448	2.66653	21.7321	0.00012381	0.0364531	rDPI_33467	chr20	41317645	41317651	chr20:41317645..41317651,chr20:41317554..41317836,-;peak:chr20:41317645..41317646,-;peakCounts:1472.7	1884	-	41317645	ENST00000559296.1	ENSG00000174306.21	alternative	ENSG00000174306	ZHX3
0.0501726	6.35329	21.7263	0.000123997	0.0364531	rDPI_46539	chr6	163414713	163414726	chr6:163414713..163414726,chr6:163414592..163415335,+;peak:chr6:163414720..163414721,+;peakCounts:40487.4	82880	+	163414720	ENST00000361752.8	ENSG00000112531.17	alternative	ENSG00000112531	QKI
-0.0409799	1.78653	21.7204	0.000124185	0.0364531	rDPI_49455	chr8	18076305	18076306	chr8:18076305..18076306,chr8:18076256..18076370,-;peak:chr8:18076305..18076306,-;peakCounts:1035.9	1151	-	18076305	ENST00000637872.1	ENSG00000104763.20	alternative	ENSG00000104763	ASAH1
0.181899	5.44157	21.711	0.000124491	0.0364531	rDPI_53840	chrX	39788212	39788213	chrX:39788212..39788213,-	8623	-	39788212	ENST00000452570.1	ENSG00000228232.1	promoter	ENSG00000228232	NA
-0.0387474	3.28088	21.6729	0.00012573	0.0366219	rDPI_33565	chr20	45406626	45406637	chr20:45406626..45406637,chr20:45406541..45406760,+;peak:chr20:45406631..45406632,+;peakCounts:1251	3877	+	45406631	ENST00000360981.8	ENSG00000244274.8	alternative	ENSG00000244274	DBNDD2
0.0389256	1.77676	21.6588	0.00012619	0.0366219	rDPI_7306	chr10	103855572	103855577	chr10:103855572..103855577,chr10:103855499..103855580,-;peak:chr10:103855576..103855577,-;peakCounts:1427.8	1807	-	103855576	ENST00000369774.8	ENSG00000107957.16	alternative	ENSG00000107957	SH3PXD2A
-0.0559285	2.51277	21.6065	0.000127921	0.0368033	rDPI_14864	chr14	23388923	23388932	chr14:23388923..23388932,chr14:23388855..23389061,-;peak:chr14:23388928..23388929,-;peakCounts:797.6	2217	-	23388928	ENST00000362287.2	ENSG00000199157.2	alternative	ENSG00000199157	MIR208A
-0.0434197	1.52103	21.599	0.000128172	0.0368033	rDPI_27873	chr2	26028567	26028597	chr2:26028567..26028597,-	594	-	26028596	ENST00000599234.2	ENSG00000268412.2	promoter	ENSG00000268412	NA
-0.0473758	3.61448	21.5709	0.000129113	0.0368033	rDPI_13514	chr12	123271815	123271821	chr12:123271815..123271821,chr12:123271753..123271925,-;peak:chr12:123271815..123271816,-;peakCounts:2493.5	4506	-	123271815	ENST00000261692.7	ENSG00000111328.7	alternative	ENSG00000111328	CDK2AP1
-0.0369405	1.44199	21.562	0.000129414	0.0368033	rDPI_6691	chr10	86756722	86756728	chr10:86756722..86756728,chr10:86756720..86756837,+;peak:chr10:86756722..86756723,+;peakCounts:769.6	1026	+	86756722	ENST00000372037.8	ENSG00000107779.14	alternative	ENSG00000107779	BMPR1A
-0.0492544	5.5892	21.5555	0.000129633	0.0368033	rDPI_10897	chr12	5044028	5044034	chr12:5044028..5044034,chr12:5043722..5044126,+;peak:chr12:5044033..5044034,+;peakCounts:10610.1	12375	+	5044033	ENST00000252321.5	ENSG00000130037.5	alternative	ENSG00000130037	KCNA5
0.0639545	1.77538	21.4767	0.000132327	0.0369002	rDPI_48337	chr7	106285727	106285739	chr7:106285727..106285739,chr7:106285672..106285832,-;peak:chr7:106285733..106285734,-;peakCounts:251.1	635	-	106285733	ENST00000681255.1	ENSG00000105835.13	enhancer	ENSG00000105835	NAMPT
0.0390153	1.595	21.4759	0.000132355	0.0369002	rDPI_22878	chr17	72120791	72120795	chr17:72120791..72120795,-	4959	-	72120792	ENST00000655689.1	ENSG00000234899.11	promoter	ENSG00000234899	SOX9-AS1
-0.0353759	3.35328	21.4576	0.00013299	0.0369002	rDPI_39278	chr4	10457422	10457429	chr4:10457422..10457429,chr4:10457330..10457448,-;peak:chr4:10457426..10457427,-;peakCounts:2234.7	3609	-	10457426	ENST00000326756.4	ENSG00000178163.8	promoter	ENSG00000178163	ZNF518B
0.0614784	4.85021	21.4554	0.000133065	0.0369002	rDPI_51910	chr9	86947506	86947507	chr9:86947506..86947507,-	10422	-	86947506	ENST00000298743.9	ENSG00000180447.7	promoter	ENSG00000180447	GAS1
0.0400304	2.32776	21.4531	0.000133146	0.0369002	rDPI_6458	chr10	73496023	73496026	chr10:73496023..73496026,chr10:73495972..73496044,-;peak:chr10:73496024..73496025,-;peakCounts:2845.9	3308	-	73496024	ENST00000360663.10	ENSG00000107758.16	alternative	ENSG00000107758	PPP3CB
-0.0508574	4.28077	21.4468	0.000133365	0.0369002	rDPI_20811	chr17	4998011	4998019	chr17:4998011..4998019,chr17:4997867..4998182,+;peak:chr17:4998014..4998015,+;peakCounts:2128.6	9590	+	4998014	ENST00000574165.1	ENSG00000129250.12	alternative	ENSG00000129250	KIF1C
-0.0298977	2.42456	21.3979	0.000135083	0.0372179	rDPI_2230	chr1	87331740	87331749	chr1:87331740..87331749,chr1:87331654..87331799,+;peak:chr1:87331744..87331745,+;peakCounts:895.5	1187	+	87331744	ENST00000489303.1	ENSG00000143013.13	alternative	ENSG00000143013	LMO4
0.0981221	1.9863	21.3348	0.000137332	0.0376786	rDPI_21821	chr17	40015436	40015441	chr17:40015436..40015441,+	11817	+	40015440	ENST00000394149.8	ENSG00000108342.13	promoter	ENSG00000108342	CSF3
-0.0547207	2.03978	21.2893	0.000138982	0.0379058	rDPI_36222	chr3	30524524	30524545	chr3:30524524..30524545,chr3:30524474..30524563,+;peak:chr3:30524537..30524538,+;peakCounts:169.2	499	+	30524537	ENST00000450746.2	ENSG00000227260.2	enhancer	ENSG00000227260	LINC01985
0.0472105	2.38433	21.28	0.000139321	0.0379058	rDPI_16592	chr14	103057585	103057603	chr14:103057585..103057603,chr14:103057191..103057670,-;peak:chr14:103057589..103057590,-;peakCounts:400.9	3699	-	103057589	ENST00000361246.7	ENSG00000198752.11	alternative	ENSG00000198752	CDC42BPB
-0.0485761	1.40141	21.2376	0.000140883	0.0381718	rDPI_34127	chr21	8401649	8401659	chr21:8401649..8401659,chr21:8401628..8401712,+;peak:chr21:8401654..8401655,+;peakCounts:162.9	836	+	8401654	ENST00000613359.1	ENSG00000275215.1	alternative	ENSG00000275215	RNA5-8SN3
0.0837903	2.92227	21.1771	0.000143143	0.0385807	rDPI_51510	chr9	34691275	34691277	chr9:34691275..34691277,chr9:34691217..34691278,-;peak:chr9:34691276..34691277,-;peakCounts:1156.5	1301	-	34691276	ENST00000311925.7	ENSG00000172724.12	promoter	ENSG00000172724	CCL19
0.055251	5.06519	21.1657	0.000143574	0.0385807	rDPI_1969	chr1	67685109	67685447	chr1:67685109..67685447,chr1:67685109..67685447,+	68395	+	67685201	ENST00000370985.4	ENSG00000116717.13	promoter	ENSG00000116717	GADD45A
-0.0374537	1.95982	21.0431	0.000148291	0.0395975	rDPI_27819	chr2	23940441	23940443	chr2:23940441..23940443,chr2:23940386..23940608,+;peak:chr2:23940442..23940443,+;peakCounts:397.7	1062	+	23940442	ENST00000309033.5	ENSG00000173960.14	alternative	ENSG00000173960	UBXN2A
0.0560941	2.02053	21.036	0.000148571	0.0395975	rDPI_3061	chr1	150974807	150974821	chr1:150974807..150974821,chr1:150974634..150974901,-;peak:chr1:150974812..150974813,-;peakCounts:2288.2	3865	-	150974812	ENST00000361419.9	ENSG00000143418.20	alternative	ENSG00000143418	CERS2
-0.0374031	4.12148	21.0041	0.000149828	0.0396772	rDPI_15800	chr14	59188725	59188734	chr14:59188725..59188734,chr14:59188620..59188800,+;peak:chr14:59188729..59188730,+;peakCounts:2045	6869	+	59188729	ENST00000556135.1	ENSG00000100592.16	alternative	ENSG00000100592	DAAM1
-0.0580884	5.35074	20.9842	0.000150618	0.0396772	rDPI_14820	chr14	23384526	23384553	chr14:23384526..23384553,chr14:23384216..23384714,-;peak:chr14:23384530..23384531,-;peakCounts:1940.4	11463	-	23384530	ENST00000651452.1	ENSG00000197616.13	not_classified	ENSG00000197616	MYH6
-0.0269779	2.16877	20.9823	0.000150693	0.0396772	rDPI_2718	chr1	115089467	115089476	chr1:115089467..115089476,chr1:115089455..115089530,-;peak:chr1:115089470..115089471,-;peakCounts:413.6	1146	-	115089470	ENST00000369515.6	ENSG00000134198.10	alternative	ENSG00000134198	TSPAN2
-0.0331966	3.58487	20.9192	0.000153234	0.0401843	rDPI_8895	chr11	57712214	57712216	chr11:57712214..57712216,chr11:57712175..57712292,-;peak:chr11:57712215..57712216,-;peakCounts:4727.7	5292	-	57712215	ENST00000337672.9	ENSG00000156603.19	promoter	ENSG00000156603	MED19
0.0400885	3.22922	20.8739	0.000155083	0.0405064	rDPI_43375	chr5	154445992	154446003	chr5:154445992..154446003,chr5:154445948..154446085,+;peak:chr5:154445997..154445998,+;peakCounts:3854.7	6600	+	154445997	ENST00000297109.11	ENSG00000164576.12	promoter	ENSG00000164576	SAP30L
0.0841607	1.82759	20.8466	0.000156211	0.0406385	rDPI_39807	chr4	74038689	74038690	chr4:74038689..74038690,chr4:74038670..74038811,-;peak:chr4:74038689..74038690,-;peakCounts:9346.5	10385	-	74038689	ENST00000296026.4	ENSG00000163734.4	promoter	ENSG00000163734	CXCL3
0.0369751	4.63108	20.8254	0.000157095	0.0406416	rDPI_14563	chr13	112690038	112690044	chr13:112690038..112690044,chr13:112689955..112690436,+;peak:chr13:112690038..112690039,+;peakCounts:27086.4	33079	+	112690038	ENST00000375630.6	ENSG00000068650.18	enhancer	ENSG00000068650	ATP11A
-0.0376295	2.87287	20.8165	0.000157468	0.0406416	rDPI_54188	chrX	64205692	64205723	chrX:64205692..64205723,chrX:64205675..64205801,-;peak:chrX:64205708..64205709,-;peakCounts:790.2	2806	-	64205708	ENST00000374869.8	ENSG00000184675.11	promoter	ENSG00000184675	AMER1
-0.0367732	1.87668	20.7633	0.00015971	0.0407536	rDPI_14890	chr14	23392949	23392950	chr14:23392949..23392950,chr14:23392878..23393060,-;peak:chr14:23392949..23392950,-;peakCounts:92.4	561	-	23392949	ENST00000362287.2	ENSG00000199157.2	alternative	ENSG00000199157	MIR208A
-0.0531709	3.45103	20.7568	0.000159987	0.0407536	rDPI_18562	chr15	99733399	99733422	chr15:99733399..99733422,chr15:99733346..99733459,-;peak:chr15:99733408..99733409,-;peakCounts:428.8	3624	-	99733408	ENST00000344791.6	ENSG00000183060.15	promoter	ENSG00000183060	LYSMD4
0.0377592	2.74565	20.7416	0.000160635	0.0407536	rDPI_29409	chr2	112482113	112482121	chr2:112482113..112482121,chr2:112482100..112482403,+;peak:chr2:112482115..112482116,+;peakCounts:3392.1	5343	+	112482115	ENST00000233336.7	ENSG00000114999.8	promoter	ENSG00000114999	TTL
0.0360923	2.66524	20.7328	0.000161011	0.0407536	rDPI_25664	chr19	18941191	18941208	chr19:18941191..18941208,chr19:18941096..18941295,-;peak:chr19:18941200..18941201,-;peakCounts:574	2042	-	18941200	ENST00000594794.5	ENSG00000051128.19	alternative	ENSG00000051128	HOMER3
0.0310881	1.85328	20.7096	0.000162008	0.0407536	rDPI_41194	chr4	186144850	186144863	chr4:186144850..186144863,chr4:186144780..186144967,+;peak:chr4:186144854..186144855,+;peakCounts:419.9	1347	+	186144854	ENST00000502970.5	ENSG00000109794.13	alternative	ENSG00000109794	FAM149A
-0.0329481	7.39251	20.705	0.000162208	0.0407536	rDPI_32910	chr20	8019759	8019762	chr20:8019759..8019762,chr20:8019525..8019851,-;peak:chr20:8019761..8019762,-;peakCounts:58712.4	66589	-	8019761	ENST00000246024.7	ENSG00000125827.9	promoter	ENSG00000125827	TMX4
0.0653878	3.90883	20.7035	0.00016227	0.0407536	rDPI_38870	chr3	194486819	194486841	chr3:194486819..194486841,chr3:194486780..194487059,-;peak:chr3:194486835..194486836,-;peakCounts:2516.7	6875	-	194486835	ENST00000645319.2	ENSG00000133657.16	alternative	ENSG00000133657	ATP13A3
0.0660506	4.83301	20.6824	0.000163187	0.0408267	rDPI_32340	chr2	224039286	224039287	chr2:224039286..224039287,chr2:224039173..224039319,-;peak:chr2:224039286..224039287,-;peakCounts:19357.2	21508	-	224039286	ENST00000258405.9	ENSG00000135919.14	promoter	ENSG00000135919	SERPINE2
-0.0363693	4.29666	20.6085	0.000166435	0.0411906	rDPI_27030	chr19	49818284	49818294	chr19:49818284..49818294,chr19:49818247..49818413,+;peak:chr19:49818289..49818290,+;peakCounts:7135.2	11017	+	49818289	ENST00000593636.1	ENSG00000104973.19	promoter	ENSG00000104973	MED25
0.0381808	5.10983	20.5864	0.000167419	0.0411906	rDPI_44236	chr6	24667043	24667066	chr6:24667043..24667066,chr6:24666878..24667341,+;peak:chr6:24667057..24667058,+;peakCounts:5739.3	30720	+	24667057	ENST00000537591.5	ENSG00000112304.11	promoter	ENSG00000112304	ACOT13
-0.0733501	2.52273	20.5844	0.00016751	0.0411906	rDPI_50443	chr8	97066100	97066106	chr8:97066100..97066106,chr8:97065932..97066126,+;peak:chr8:97066105..97066106,+;peakCounts:928.7	1947	+	97066105	ENST00000529551.1	ENSG00000104324.16	alternative	ENSG00000104324	CPQ
-0.0318919	1.04958	25.1707	0.000168657	0.0411906	rDPI_46126	chr6	137218984	137218985	chr6:137218984..137218985,-	128	-	137218984	ENST00000647124.1	ENSG00000027697.15	alternative	ENSG00000027697	IFNGR1
-0.0727569	5.49545	20.5521	0.000168962	0.0411906	rDPI_47959	chr7	93922049	93922060	chr7:93922049..93922060,chr7:93921658..93922215,+;peak:chr7:93922054..93922055,+;peakCounts:15342.3	20180	+	93922054	ENST00000248564.6	ENSG00000127920.6	alternative	ENSG00000127920	GNG11
-0.0329512	3.21945	20.5502	0.000169049	0.0411906	rDPI_41334	chr5	7869182	7869197	chr5:7869182..7869197,chr5:7869114..7869235,+;peak:chr5:7869190..7869191,+;peakCounts:2160.9	6480	+	7869190	ENST00000503550.5	ENSG00000124275.15	promoter	ENSG00000124275	MTRR
0.0407905	2.96291	20.55	0.000169057	0.0411906	rDPI_53583	chrX	10015253	10015258	chrX:10015253..10015258,chrX:10015172..10015317,+;peak:chrX:10015255..10015256,+;peakCounts:3890.8	5995	+	10015255	ENST00000380861.9	ENSG00000047644.19	alternative	ENSG00000047644	WWC3
0.0318378	1.35223	20.5332	0.000169821	0.0412229	rDPI_35337	chr22	38456104	38456125	chr22:38456104..38456125,chr22:38456100..38456163,-;peak:chr22:38456119..38456120,-;peakCounts:215.1	702	-	38456119	ENST00000303592.3	ENSG00000168135.4	alternative	ENSG00000168135	KCNJ4
-0.0457492	4.04407	20.461	0.000173136	0.0418018	rDPI_14917	chr14	23393905	23393911	chr14:23393905..23393911,chr14:23393670..23393912,-;peak:chr14:23393908..23393909,-;peakCounts:2256.2	4205	-	23393908	ENST00000362287.2	ENSG00000199157.2	alternative	ENSG00000199157	MIR208A
-0.0407416	1.86698	20.4535	0.000173486	0.0418018	rDPI_26720	chr19	46495867	46495874	chr19:46495867..46495874,chr19:46495863..46495935,-;peak:chr19:46495867..46495868,-;peakCounts:382.5	513	-	46495867	ENST00000599531.2	ENSG00000204851.7	promoter	ENSG00000204851	PNMA8B
-0.0345062	3.04706	20.3976	0.000176104	0.0418711	rDPI_32269	chr2	219543559	219543569	chr2:219543559..219543569,chr2:219543469..219543656,-;peak:chr2:219543563..219543564,-;peakCounts:834.5	2239	-	219543563	ENST00000373891.2	ENSG00000123989.14	alternative	ENSG00000123989	CHPF
-0.0346498	3.47027	20.3861	0.000176652	0.0418711	rDPI_21333	chr17	18858156	18858171	chr17:18858156..18858171,chr17:18858096..18858253,+;peak:chr17:18858159..18858160,+;peakCounts:696.1	3607	+	18858159	ENST00000575102.5	ENSG00000141127.15	alternative	ENSG00000141127	PRPSAP2
-0.0325268	1.94385	20.3833	0.000176785	0.0418711	rDPI_6023	chr10	45000950	45000955	chr10:45000950..45000955,chr10:45000884..45000995,+;peak:chr10:45000952..45000953,+;peakCounts:610.7	1007	+	45000952	ENST00000298299.4	ENSG00000165512.5	alternative	ENSG00000165512	ZNF22
-0.0396493	3.186	20.3691	0.000177458	0.0418711	rDPI_7486	chr10	114526819	114526838	chr10:114526819..114526838,chr10:114526718..114526976,-;peak:chr10:114526827..114526828,-;peakCounts:586.1	2481	-	114526827	ENST00000369253.6	ENSG00000099204.20	alternative	ENSG00000099204	ABLIM1
-0.0427366	2.85177	20.3589	0.000177946	0.0418711	rDPI_16553	chr14	102085358	102085380	chr14:102085358..102085380,chr14:102085324..102085434,-;peak:chr14:102085374..102085375,-;peakCounts:736.1	1924	-	102085374	ENST00000555662.1	ENSG00000080824.19	alternative	ENSG00000080824	HSP90AA1
-0.0391373	3.52442	20.3491	0.000178413	0.0418711	rDPI_2719	chr1	115089480	115089506	chr1:115089480..115089506,chr1:115089455..115089530,-;peak:chr1:115089493..115089494,-;peakCounts:669.6	3635	-	115089493	ENST00000369516.7	ENSG00000134198.10	promoter	ENSG00000134198	TSPAN2
0.0417898	1.43168	20.3409	0.000178808	0.0418711	rDPI_11667	chr12	48865870	48865871	chr12:48865870..48865871,-	1873	-	48865870	ENST00000309739.6	ENSG00000172602.11	promoter	ENSG00000172602	RND1
-0.051401	5.48057	20.3389	0.000178903	0.0418711	rDPI_15026	chr14	23407144	23407169	chr14:23407144..23407169,chr14:23407021..23407442,-;peak:chr14:23407155..23407156,-;peakCounts:2581.2	8926	-	23407155	ENST00000557461.2	ENSG00000197616.13	alternative	ENSG00000197616	MYH6
-0.0567338	4.93043	20.3168	0.000179972	0.0419708	rDPI_7953	chr11	1997812	1997818	chr11:1997812..1997818,chr11:1997393..1997897,-;peak:chr11:1997812..1997813,-;peakCounts:2236.9	13287	-	1997812	ENST00000412788.5	ENSG00000130600.19	alternative	ENSG00000130600	H19
0.0342643	4.65702	20.294	0.000181079	0.0420787	rDPI_48244	chr7	101816003	101816014	chr7:101816003..101816014,chr7:101815738..101816073,+;peak:chr7:101816008..101816009,+;peakCounts:14245.2	23153	+	101816008	ENST00000292538.9	ENSG00000257923.12	promoter	ENSG00000257923	CUX1
0.0448032	3.2334	20.2796	0.000181784	0.0420928	rDPI_9581	chr11	67266451	67266462	chr11:67266451..67266462,chr11:67266347..67266504,+;peak:chr11:67266456..67266457,+;peakCounts:1213.4	4120	+	67266456	ENST00000308595.10	ENSG00000173020.11	alternative	ENSG00000173020	GRK2
-0.0331903	2.89055	20.2489	0.000183295	0.0421907	rDPI_23785	chr18	27951270	27951295	chr18:27951270..27951295,chr18:27951259..27951488,-;peak:chr18:27951289..27951290,-;peakCounts:666	2603	-	27951289	ENST00000674998.1	ENSG00000170558.10	alternative	ENSG00000170558	CDH2
0.031912	3.52895	20.2447	0.0001835	0.0421907	rDPI_24071	chr18	51030229	51030238	chr18:51030229..51030238,chr18:51030145..51030339,+;peak:chr18:51030233..51030234,+;peakCounts:3502.6	7435	+	51030233	ENST00000342988.8	ENSG00000141646.14	alternative	ENSG00000141646	SMAD4
-0.046614	2.36633	20.2202	0.000184719	0.0422683	rDPI_21790	chr17	39667881	39667903	chr17:39667881..39667903,chr17:39667791..39668043,+;peak:chr17:39667897..39667898,+;peakCounts:421.4	1314	+	39667897	ENST00000394246.1	ENSG00000141744.4	alternative	ENSG00000141744	PNMT
0.0384117	2.65757	20.1868	0.000186389	0.0422683	rDPI_36126	chr3	16884971	16884984	chr3:16884971..16884984,chr3:16884916..16885048,+;peak:chr3:16884975..16884976,+;peakCounts:941	3783	+	16884975	ENST00000615277.5	ENSG00000154822.18	promoter	ENSG00000154822	PLCL2
0.0372683	4.88472	20.1767	0.000186899	0.0422683	rDPI_24589	chr19	3062367	3062378	chr19:3062367..3062378,chr19:3062179..3062667,-;peak:chr19:3062372..3062373,-;peakCounts:7189.4	11851	-	3062372	ENST00000585557.1	ENSG00000104964.15	alternative	ENSG00000104964	TLE5
0.0280993	1.57718	20.1744	0.000187015	0.0422683	rDPI_29392	chr2	111884191	111884192	chr2:111884191..111884192,chr2:111884126..111884207,-;peak:chr2:111884191..111884192,-;peakCounts:1131	1457	-	111884191	ENST00000341068.8	ENSG00000153107.13	alternative	ENSG00000153107	ANAPC1
-0.0500237	2.09891	20.1732	0.000187073	0.0422683	rDPI_8468	chr11	27890418	27890437	chr11:27890418..27890437,-	2455	-	27890436	ENST00000530115.1	ENSG00000224411.3	alternative	ENSG00000224411	NA
-0.0367973	2.12473	20.1524	0.00018813	0.0423604	rDPI_24646	chr19	3765178	3765179	chr19:3765178..3765179,chr19:3765176..3765234,+;peak:chr19:3765178..3765179,+;peakCounts:1096.2	1218	+	3765178	ENST00000589174.1	ENSG00000183617.5	alternative	ENSG00000183617	MRPL54
-0.0453329	3.25032	20.1378	0.000188871	0.0423811	rDPI_26805	chr19	47515014	47515019	chr19:47515014..47515019,chr19:47514879..47515123,-;peak:chr19:47515015..47515016,-;peakCounts:1312.1	3488	-	47515015	ENST00000595227.5	ENSG00000105402.8	alternative	ENSG00000105402	NAPA
0.177501	6.56567	20.1	0.000190816	0.0425614	rDPI_37404	chr3	96617906	96617923	chr3:96617906..96617923,chr3:96617906..96617981,-;peak:chr3:96617915..96617916,-;peakCounts:3157.2	10182	-	96617915	ENST00000600213.3	ENSG00000269028.3	alternative	ENSG00000269028	MTRNR2L2
0.0352097	2.42204	20.0887	0.000191397	0.0425614	rDPI_53018	chr9	133149199	133149215	chr9:133149199..133149215,chr9:133149171..133149272,-;peak:chr9:133149210..133149211,-;peakCounts:711	2329	-	133149210	ENST00000393160.7	ENSG00000160271.16	promoter	ENSG00000160271	RALGDS
-0.0382786	1.29259	20.0677	0.000192489	0.0425614	rDPI_42913	chr5	138753287	138753298	chr5:138753287..138753298,chr5:138753231..138753347,-;peak:chr5:138753292..138753293,-;peakCounts:105.3	157	-	138753292	ENST00000520838.1	ENSG00000253404.1	alternative	ENSG00000253404	LOC105379194
-0.0409772	5.01045	20.0172	0.000195143	0.0425614	rDPI_21146	chr17	10036643	10036672	chr17:10036643..10036672,chr17:10036451..10036881,-;peak:chr17:10036650..10036651,-;peakCounts:2494.8	10504	-	10036650	ENST00000578655.1	ENSG00000007237.19	promoter	ENSG00000007237	GAS7
0.047569	1.3418	20.0007	0.000196016	0.0425614	rDPI_19326	chr16	27313751	27313757	chr16:27313751..27313757,chr16:27313566..27313784,+;peak:chr16:27313756..27313757,+;peakCounts:455.4	564	+	27313756	ENST00000566117.5	ENSG00000077238.14	alternative	ENSG00000077238	IL4R
-0.0359069	3.27982	19.9807	0.000197086	0.0425614	rDPI_239	chr1	6235963	6235969	chr1:6235963..6235969,chr1:6235909..6236061,-;peak:chr1:6235964..6235965,-;peakCounts:467.5	2834	-	6235964	ENST00000343813.10	ENSG00000116237.16	alternative	ENSG00000116237	ICMT
-0.0391793	4.40742	19.9802	0.00019711	0.0425614	rDPI_16675	chr14	104753145	104753157	chr14:104753145..104753157,chr14:104753099..104753297,+;peak:chr14:104753147..104753148,+;peakCounts:3341.8	11876	+	104753147	ENST00000535554.4	ENSG00000184990.13	alternative	ENSG00000184990	SIVA1
-0.0405105	2.83746	19.9776	0.000197248	0.0425614	rDPI_51556	chr9	35658308	35658310	chr9:35658308..35658310,chr9:35658253..35658496,+;peak:chr9:35658309..35658310,+;peakCounts:1112.3	3873	+	35658309	ENST00000378407.7	ENSG00000159884.12	alternative	ENSG00000159884	CCDC107
-0.0340094	1.83077	19.9771	0.000197275	0.0425614	rDPI_48151	chr7	100335912	100335919	chr7:100335912..100335919,chr7:100335858..100336000,-;peak:chr7:100335916..100335917,-;peakCounts:252	670	-	100335916	ENST00000675639.1	ENSG00000078319.10	alternative	ENSG00000078319	PMS2P1
0.0311373	1.19059	19.9732	0.000197485	0.0425614	rDPI_7308	chr10	103855712	103855719	chr10:103855712..103855719,chr10:103855681..103855786,-;peak:chr10:103855713..103855714,-;peakCounts:257.4	617	-	103855713	ENST00000369774.8	ENSG00000107957.16	alternative	ENSG00000107957	SH3PXD2A
-0.0310596	4.05102	19.9645	0.000197952	0.0425614	rDPI_23067	chr17	76103753	76103768	chr17:76103753..76103768,chr17:76103646..76103792,-;peak:chr17:76103765..76103766,-;peakCounts:1280.4	7513	-	76103765	ENST00000335146.11	ENSG00000182473.22	promoter	ENSG00000182473	EXOC7
0.0298327	2.93467	19.9628	0.000198045	0.0425614	rDPI_17760	chr15	64775610	64775616	chr15:64775610..64775616,chr15:64775214..64775633,-;peak:chr15:64775615..64775616,-;peakCounts:640.4	4202	-	64775615	ENST00000300069.5	ENSG00000166831.9	alternative	ENSG00000166831	RBPMS2
0.0831328	5.68362	19.9609	0.000198148	0.0425614	rDPI_29723	chr2	151734419	151734516	chr2:151734419..151734516,chr2:151734419..151734516,-	15414	-	151734475	ENST00000409198.5	ENSG00000183091.20	promoter	ENSG00000183091	NEB
0.0291655	2.23171	19.9432	0.000199098	0.0426252	rDPI_12874	chr12	106248015	106248023	chr12:106248015..106248023,chr12:106247675..106248181,-;peak:chr12:106248020..106248021,-;peakCounts:893.9	2741	-	106248020	ENST00000378026.5	ENSG00000136026.14	alternative	ENSG00000136026	CKAP4
-0.0452645	3.7149	19.9256	0.000200054	0.0426899	rDPI_32939	chr20	13784891	13784898	chr20:13784891..13784898,chr20:13784876..13784964,-;peak:chr20:13784894..13784895,-;peakCounts:2659.5	4890	-	13784894	ENST00000202816.5	ENSG00000089048.15	promoter	ENSG00000089048	ESF1
-0.0599632	2.54881	19.8999	0.00020146	0.0428407	rDPI_48820	chr7	134933572	134933583	chr7:134933572..134933583,chr7:134932983..134934062,+;peak:chr7:134933577..134933578,+;peakCounts:1145.7	1488	+	134933577	ENST00000478075.1	ENSG00000122786.20	alternative	ENSG00000122786	CALD1
0.0302699	1.18498	23.0856	0.000202073	0.0428407	rDPI_47759	chr7	77537049	77537059	chr7:77537049..77537059,chr7:77537004..77537355,+;peak:chr7:77537053..77537054,+;peakCounts:209.9	1053	+	77537053	ENST00000248594.11	ENSG00000127947.16	alternative	ENSG00000127947	PTPN12
0.035537	3.8653	19.8553	0.000203919	0.0430923	rDPI_14564	chr13	112690175	112690186	chr13:112690175..112690186,chr13:112689955..112690436,+;peak:chr13:112690180..112690181,+;peakCounts:6196.4	10472	+	112690180	ENST00000375630.6	ENSG00000068650.18	alternative	ENSG00000068650	ATP11A
-0.0520553	5.34798	19.8038	0.000206801	0.043372	rDPI_15021	chr14	23405733	23405774	chr14:23405733..23405774,chr14:23405604..23405786,-;peak:chr14:23405745..23405746,-;peakCounts:1223.1	8600	-	23405745	ENST00000557461.2	ENSG00000197616.13	alternative	ENSG00000197616	MYH6
-0.217981	7.45825	19.8001	0.00020701	0.043372	rDPI_3629	chr1	160885031	160885214	chr1:160885031..160885214,chr1:160885031..160885214,-	32130	-	160885170	ENST00000326245.4	ENSG00000179914.5	promoter	ENSG00000179914	ITLN1
-0.0422523	3.12423	19.7914	0.000207498	0.043372	rDPI_43455	chr5	159263285	159263296	chr5:159263285..159263296,chr5:159263259..159263345,+;peak:chr5:159263290..159263291,+;peakCounts:2214.9	2739	+	159263290	ENST00000296786.8	ENSG00000164332.8	promoter	ENSG00000164332	UBLCP1
-0.0293485	2.94016	19.7765	0.000208342	0.043372	rDPI_21706	chr17	38730380	38730386	chr17:38730380..38730386,chr17:38730145..38730427,+;peak:chr17:38730385..38730386,+;peakCounts:895.7	3511	+	38730385	ENST00000619858.1	ENSG00000277972.2	alternative	ENSG00000277972	CISD3
0.0643054	2.06989	19.7709	0.000208666	0.043372	rDPI_53559	chrX	3346649	3346651	chrX:3346649..3346651,chrX:3346602..3346712,-;peak:chrX:3346649..3346650,-;peakCounts:2063.7	2327	-	3346649	ENST00000217939.7	ENSG00000101825.8	promoter	ENSG00000101825	MXRA5
-0.0535525	2.75194	19.7431	0.000210254	0.043372	rDPI_14833	chr14	23386005	23386015	chr14:23386005..23386015,chr14:23385926..23386141,-;peak:chr14:23386007..23386008,-;peakCounts:452.1	3027	-	23386007	ENST00000651452.1	ENSG00000197616.13	alternative	ENSG00000197616	MYH6
0.0469366	2.80597	19.7364	0.000210638	0.043372	rDPI_24295	chr18	79951638	79951645	chr18:79951638..79951645,chr18:79951593..79951693,-;peak:chr18:79951641..79951642,-;peakCounts:1569.8	3362	-	79951641	ENST00000357575.8	ENSG00000122490.19	alternative	ENSG00000122490	SLC66A2
0.0519254	3.55531	19.7273	0.000211164	0.043372	rDPI_44727	chr6	33073635	33073640	chr6:33073635..33073640,chr6:33073584..33073696,-;peak:chr6:33073637..33073638,-;peakCounts:3971.9	6428	-	33073637	ENST00000463066.1	ENSG00000231389.7	alternative	ENSG00000231389	HLA-DPA1
0.055862	2.64751	19.7228	0.000211424	0.043372	rDPI_34381	chr21	34888693	34888696	chr21:34888693..34888696,chr21:34888531..34888745,-;peak:chr21:34888693..34888694,-;peakCounts:2772	3246	-	34888693	ENST00000344691.8	ENSG00000159216.19	promoter	ENSG00000159216	RUNX1
0.0436432	3.77761	19.7148	0.000211885	0.043372	rDPI_18505	chr15	98648539	98648541	chr15:98648539..98648541,chr15:98648394..98648697,+;peak:chr15:98648539..98648540,+;peakCounts:13061.7	14903	+	98648539	ENST00000649865.1	ENSG00000140443.15	promoter	ENSG00000140443	IGF1R
-0.0488538	3.91017	19.6842	0.000213666	0.0435999	rDPI_32338	chr2	223957441	223957447	chr2:223957441..223957447,chr2:223957359..223957490,+;peak:chr2:223957443..223957444,+;peakCounts:5417	6600	+	223957443	ENST00000258383.4	ENSG00000135900.4	alternative	ENSG00000135900	MRPL44
0.0350031	1.45664	19.6581	0.000215196	0.0437753	rDPI_50782	chr8	125430402	125430405	chr8:125430402..125430405,chr8:125430153..125430497,+;peak:chr8:125430404..125430405,+;peakCounts:628	896	+	125430404	ENST00000311922.4	ENSG00000173334.4	alternative	ENSG00000173334	TRIB1
-0.0387037	2.18968	19.6219	0.000217342	0.0440746	rDPI_4647	chr1	209676050	209676078	chr1:209676050..209676078,chr1:209675649..209676173,+;peak:chr1:209676077..209676078,+;peakCounts:233.8	1461	+	209676077	ENST00000367029.5	ENSG00000123689.6	enhancer	ENSG00000123689	G0S2
0.0422689	1.88477	19.5928	0.000219082	0.0442129	rDPI_29278	chr2	101308614	101308625	chr2:101308614..101308625,chr2:101308597..101308756,-;peak:chr2:101308619..101308620,-;peakCounts:356.7	1093	-	101308619	ENST00000295317.4	ENSG00000163162.9	alternative	ENSG00000163162	RNF149
-0.0472383	5.00198	19.5878	0.000219378	0.0442129	rDPI_15022	chr14	23407048	23407066	chr14:23407048..23407066,chr14:23407021..23407442,-;peak:chr14:23407054..23407055,-;peakCounts:1490.2	7880	-	23407054	ENST00000557461.2	ENSG00000197616.13	alternative	ENSG00000197616	MYH6
-0.0377684	1.76712	19.5458	0.000221925	0.0442161	rDPI_4456	chr1	203795703	203795711	chr1:203795703..203795711,+	1845	+	203795706	ENST00000332127.8	ENSG00000058673.17	alternative	ENSG00000058673	ZC3H11A
-0.039309	1.81553	19.5386	0.000222364	0.0442161	rDPI_38334	chr3	155806264	155806272	chr3:155806264..155806272,chr3:155806252..155806313,-;peak:chr3:155806266..155806267,-;peakCounts:864	1994	-	155806266	ENST00000482061.6	ENSG00000174928.16	promoter	ENSG00000174928	C3orf33
-0.0276808	1.36578	19.5276	0.000223032	0.0442161	rDPI_22547	chr17	58090761	58090771	chr17:58090761..58090771,chr17:58090739..58090856,+;peak:chr17:58090765..58090766,+;peakCounts:347.4	609	+	58090765	ENST00000624409.1	ENSG00000279207.1	enhancer	ENSG00000279207	NA
-0.0408944	3.1669	19.5197	0.000223516	0.0442161	rDPI_7371	chr10	110567716	110567720	chr10:110567716..110567720,chr10:110567654..110567808,+;peak:chr10:110567719..110567720,+;peakCounts:1295	3365	+	110567719	ENST00000361804.5	ENSG00000108055.10	alternative	ENSG00000108055	SMC3
0.0391873	3.4439	19.5161	0.000223743	0.0442161	rDPI_24630	chr19	3557584	3557585	chr19:3557584..3557585,chr19:3557531..3557634,-;peak:chr19:3557584..3557585,-;peakCounts:6471.9	7191	-	3557584	ENST00000355415.7	ENSG00000161091.13	promoter	ENSG00000161091	MFSD12
0.0604918	2.42362	19.5091	0.000224172	0.0442161	rDPI_38250	chr3	149221824	149221835	chr3:149221824..149221835,chr3:149221822..149221945,-;peak:chr3:149221824..149221825,-;peakCounts:278.1	693	-	149221824	ENST00000481169.5	ENSG00000047457.14	promoter	ENSG00000047457	CP
0.040112	2.22605	19.5	0.000224733	0.0442161	rDPI_4478	chr1	204494799	204494811	chr1:204494799..204494811,chr1:204494524..204494914,-;peak:chr1:204494805..204494806,-;peakCounts:1356.3	2489	-	204494805	ENST00000415899.1	ENSG00000133056.13	promoter	ENSG00000133056	PIK3C2B
-0.0405442	2.9485	19.4987	0.000224812	0.0442161	rDPI_46693	chr7	1160422	1160454	chr7:1160422..1160454,chr7:1160342..1160492,+;peak:chr7:1160432..1160433,+;peakCounts:390.6	2895	+	1160432	ENST00000660500.1	ENSG00000229043.3	promoter	ENSG00000229043	ZFAND2A-DT
-0.0750491	5.30112	19.4566	0.000227428	0.0445161	rDPI_53333	chrM	4011	4022	chrM:4011..4022,chrM:3973..4105,+;peak:chrM:4015..4016,+;peakCounts:1554.2	17741	+	4015	ENST00000387365.1	ENSG00000210100.1	alternative	ENSG00000210100	NA
0.031869	2.61955	19.4523	0.0002277	0.0445161	rDPI_47836	chr7	82443769	82443783	chr7:82443769..82443783,chr7:82443720..82443842,-;peak:chr7:82443774..82443775,-;peakCounts:3069.9	4994	-	82443774	ENST00000356860.8	ENSG00000153956.16	promoter	ENSG00000153956	CACNA2D1
0.0301033	1.17765	19.5889	0.000231533	0.0451262	rDPI_39713	chr4	65024270	65024289	chr4:65024270..65024289,chr4:65024259..65024345,-;peak:chr4:65024274..65024275,-;peakCounts:175.5	680	-	65024274	ENST00000652257.1	ENSG00000250125.4	promoter	ENSG00000250125	LINC02232
0.0313413	2.27648	19.375	0.000232602	0.0451262	rDPI_20444	chr16	88453275	88453281	chr16:88453275..88453281,chr16:88453255..88453314,+;peak:chr16:88453280..88453281,+;peakCounts:1245.6	1525	+	88453280	ENST00000319555.8	ENSG00000179588.9	promoter	ENSG00000179588	ZFPM1
0.0356608	0.817921	19.3704	0.000232894	0.0451262	rDPI_8466	chr11	27700455	27700456	chr11:27700455..27700456,chr11:27700381..27700513,-;peak:chr11:27700455..27700456,-;peakCounts:3764.7	4183	-	27700455	ENST00000356660.9	ENSG00000176697.20	promoter	ENSG00000176697	BDNF
0.0665736	4.89766	19.3314	0.000235413	0.0452674	rDPI_23801	chr18	28177964	28177974	chr18:28177964..28177974,chr18:28177613..28178046,-;peak:chr18:28177968..28177969,-;peakCounts:8607.6	23564	-	28177968	ENST00000676445.1	ENSG00000170558.10	promoter	ENSG00000170558	CDH2
0.0267489	4.55728	19.3105	0.000236777	0.0452674	rDPI_2138	chr1	79006695	79006711	chr1:79006695..79006711,chr1:79006669..79006833,-;peak:chr1:79006705..79006706,-;peakCounts:3475.8	11295	-	79006705	ENST00000640664.2	ENSG00000162618.15	promoter	ENSG00000162618	ADGRL4
-0.035097	3.57186	19.3103	0.000236791	0.0452674	rDPI_43325	chr5	151081062	151081069	chr5:151081062..151081069,chr5:151080908..151081105,-;peak:chr5:151081065..151081066,-;peakCounts:3624.4	4928	-	151081065	ENST00000518977.5	ENSG00000145901.16	alternative	ENSG00000145901	TNIP1
0.0460786	4.94694	19.3083	0.000236923	0.0452674	rDPI_20614	chr17	1562770	1562796	chr17:1562770..1562796,chr17:1562562..1562868,-;peak:chr17:1562782..1562783,-;peakCounts:3354.3	19209	-	1562782	ENST00000313486.12	ENSG00000174238.15	promoter	ENSG00000174238	PITPNA
-0.046734	5.88219	19.3057	0.000237089	0.0452674	rDPI_28816	chr2	71227063	71227079	chr2:71227063..71227079,chr2:71226929..71227141,-;peak:chr2:71227071..71227072,-;peakCounts:11541.6	38864	-	71227071	ENST00000244221.9	ENSG00000124374.9	promoter	ENSG00000124374	PAIP2B
0.0441307	3.73338	19.2918	0.000238002	0.0453093	rDPI_1105	chr1	30908740	30908765	chr1:30908740..30908765,chr1:30908675..30908828,-;peak:chr1:30908758..30908759,-;peakCounts:1680.3	6911	-	30908758	ENST00000339394.7	ENSG00000162512.16	promoter	ENSG00000162512	SDC3
0.120241	3.7097	19.2555	0.000240406	0.0456338	rDPI_10706	chr11	130428606	130428610	chr11:130428606..130428610,-	1559	-	130428609	ENST00000257359.7	ENSG00000134917.10	promoter	ENSG00000134917	ADAMTS8
0.0356006	2.52296	19.2188	0.000242857	0.0459654	rDPI_16388	chr14	93115913	93115919	chr14:93115913..93115919,chr14:93115770..93115943,-;peak:chr14:93115914..93115915,-;peakCounts:1477.1	4333	-	93115914	ENST00000354313.7	ENSG00000100605.17	alternative	ENSG00000100605	ITPK1
-0.0450101	3.202	19.1858	0.000245091	0.0462542	rDPI_48954	chr7	141301740	141301751	chr7:141301740..141301751,chr7:141301598..141301845,+;peak:chr7:141301745..141301746,+;peakCounts:1972.5	4621	+	141301745	ENST00000568872.1	ENSG00000261624.1	alternative	ENSG00000261624	NDUFB10P2
-0.0525942	3.24401	19.1455	0.000247842	0.0466385	rDPI_18561	chr15	99733376	99733390	chr15:99733376..99733390,chr15:99733346..99733459,-;peak:chr15:99733379..99733380,-;peakCounts:532.8	2519	-	99733379	ENST00000604213.1	ENSG00000183060.15	alternative	ENSG00000183060	LYSMD4
-0.0507741	6.18911	19.1351	0.000248559	0.0466391	rDPI_21111	chr17	8383193	8383194	chr17:8383193..8383194,chr17:8383111..8383253,-;peak:chr17:8383193..8383194,-;peakCounts:28832.4	32036	-	8383193	ENST00000648839.1	ENSG00000161970.15	promoter	ENSG00000161970	RPL26
0.0297707	5.59422	19.116	0.000249881	0.046718	rDPI_24070	chr18	51030209	51030228	chr18:51030209..51030228,chr18:51030145..51030339,+;peak:chr18:51030222..51030223,+;peakCounts:16131.6	41459	+	51030222	ENST00000590061.1	ENSG00000141646.14	promoter	ENSG00000141646	SMAD4
-0.0285979	1.42328	19.103	0.000250782	0.046718	rDPI_21311	chr17	18260614	18260621	chr17:18260614..18260621,chr17:18260492..18260704,+;peak:chr17:18260617..18260618,+;peakCounts:138.1	674	+	18260617	ENST00000577216.1	ENSG00000177427.13	alternative	ENSG00000177427	MIEF2
0.0457903	3.0858	19.0799	0.000252401	0.046718	rDPI_46412	chr6	157381495	157381522	chr6:157381495..157381522,chr6:157381452..157381559,+;peak:chr6:157381507..157381508,+;peakCounts:555.3	4272	+	157381507	ENST00000359775.10	ENSG00000175048.17	enhancer	ENSG00000175048	ZDHHC14
-0.0380421	1.66603	19.0764	0.000252643	0.046718	rDPI_44027	chr6	7580530	7580542	chr6:7580530..7580542,chr6:7580334..7581017,+;peak:chr6:7580535..7580536,+;peakCounts:770.4	1276	+	7580535	ENST00000342415.6	ENSG00000168566.13	alternative	ENSG00000168566	SNRNP48
0.0384923	3.58032	19.0583	0.000253919	0.046718	rDPI_22424	chr17	50707856	50707877	chr17:50707856..50707877,chr17:50707530..50707991,-;peak:chr17:50707863..50707864,-;peakCounts:586.5	6954	-	50707863	ENST00000285243.7	ENSG00000154945.7	alternative	ENSG00000154945	ANKRD40
-0.0515899	4.87029	19.0556	0.000254112	0.046718	rDPI_16601	chr14	103405137	103405148	chr14:103405137..103405148,chr14:103405067..103405182,+;peak:chr14:103405140..103405141,+;peakCounts:7401.6	17614	+	103405140	ENST00000561071.5	ENSG00000075413.19	promoter	ENSG00000075413	MARK3
0.0550536	2.96308	19.0499	0.000254511	0.046718	rDPI_36937	chr3	50611771	50611775	chr3:50611771..50611775,chr3:50611704..50611834,-;peak:chr3:50611774..50611775,-;peakCounts:11771.1	14119	-	50611774	ENST00000348721.4	ENSG00000114737.16	promoter	ENSG00000114737	CISH
-0.0508649	4.20521	19.0472	0.000254703	0.046718	rDPI_48955	chr7	141301770	141301776	chr7:141301770..141301776,chr7:141301598..141301845,+;peak:chr7:141301775..141301776,+;peakCounts:6376.5	8888	+	141301775	ENST00000568872.1	ENSG00000261624.1	enhancer	ENSG00000261624	NDUFB10P2
0.0372142	4.96011	19.0349	0.000255578	0.0467471	rDPI_173	chr1	1891096	1891110	chr1:1891096..1891110,chr1:1890824..1891182,-;peak:chr1:1891099..1891100,-;peakCounts:4111	17780	-	1891099	ENST00000615252.4	ENSG00000078369.18	alternative	ENSG00000078369	GNB1
0.0411061	3.0404	19.0068	0.000257585	0.0467725	rDPI_46583	chr6	167826875	167826889	chr6:167826875..167826889,chr6:167826838..167827005,+;peak:chr6:167826880..167826881,+;peakCounts:1804.9	4327	+	167826880	ENST00000400825.8	ENSG00000130396.20	alternative	ENSG00000130396	AFDN
-0.0259175	5.38345	19.0066	0.0002576	0.0467725	rDPI_55062	chrX	154412097	154412102	chrX:154412097..154412102,chrX:154412002..154412159,-;peak:chrX:154412101..154412102,-;peakCounts:16518.6	19229	-	154412101	ENST00000424626.5	ENSG00000013563.14	promoter	ENSG00000013563	DNASE1L1
-0.040864	4.32915	18.9925	0.000258608	0.0467725	rDPI_31925	chr2	212539253	212539261	chr2:212539253..212539261,chr2:212539221..212539305,-;peak:chr2:212539253..212539254,-;peakCounts:3769.2	6021	-	212539253	ENST00000436443.5	ENSG00000178568.15	enhancer	ENSG00000178568	ERBB4
0.138623	3.02159	18.9905	0.000258754	0.0467725	rDPI_37407	chr3	96617961	96617967	chr3:96617961..96617967,chr3:96617906..96617981,-;peak:chr3:96617966..96617967,-;peakCounts:801.2	1972	-	96617966	ENST00000600213.3	ENSG00000269028.3	alternative	ENSG00000269028	MTRNR2L2
-0.033965	1.63975	18.972	0.000260091	0.0467725	rDPI_42619	chr5	123423344	123423345	chr5:123423344..123423345,chr5:123423277..123423417,-;peak:chr5:123423344..123423345,-;peakCounts:303.2	422	-	123423344	ENST00000513565.6	ENSG00000168944.17	alternative	ENSG00000168944	CEP120
-0.029019	2.19937	18.9664	0.000260496	0.0467725	rDPI_2171	chr1	84690231	84690252	chr1:84690231..84690252,chr1:84690169..84690346,-;peak:chr1:84690246..84690247,-;peakCounts:495.9	1052	-	84690246	ENST00000603677.1	ENSG00000117155.17	alternative	ENSG00000117155	SSX2IP
0.0256446	3.9898	18.9537	0.000261423	0.0467725	rDPI_1339	chr1	37595935	37595939	chr1:37595935..37595939,chr1:37595878..37595982,-;peak:chr1:37595935..37595936,-;peakCounts:4823.1	7950	-	37595935	ENST00000373062.8	ENSG00000134697.13	promoter	ENSG00000134697	GNL2
-0.0314255	3.22557	18.9481	0.000261828	0.0467725	rDPI_3982	chr1	178871063	178871084	chr1:178871063..178871084,chr1:178870958..178871141,-;peak:chr1:178871077..178871078,-;peakCounts:1130.4	3296	-	178871077	ENST00000234816.7	ENSG00000116194.13	promoter	ENSG00000116194	ANGPTL1
-0.0273961	8.28315	18.9214	0.000263792	0.0467725	rDPI_48479	chr7	116526254	116526686	chr7:116526254..116526686,chr7:116526254..116526686,+	107336	+	116526362	ENST00000393468.1	ENSG00000105974.13	promoter	ENSG00000105974	CAV1
-0.0637872	9.40245	18.9169	0.00026412	0.0467725	rDPI_24799	chr19	5690292	5690298	chr19:5690292..5690298,chr19:5690176..5690434,+;peak:chr19:5690297..5690298,+;peakCounts:121136.4	225640	+	5690297	ENST00000582463.5	ENSG00000130255.13	promoter	ENSG00000130255	RPL36
-0.0545445	2.41886	18.9081	0.00026477	0.0467725	rDPI_10480	chr11	119095465	119095469	chr11:119095465..119095469,-	3340	-	119095465	ENST00000530167.1	ENSG00000188486.3	promoter	ENSG00000188486	H2AX
0.0550086	3.94317	18.906	0.000264922	0.0467725	rDPI_21492	chr17	29589608	29589633	chr17:29589608..29589633,chr17:29589462..29589676,-;peak:chr17:29589627..29589628,-;peakCounts:2040.1	9523	-	29589627	ENST00000335356.7	ENSG00000108262.16	promoter	ENSG00000108262	GIT1
-0.0361784	3.60891	18.8976	0.00026555	0.0467725	rDPI_37004	chr3	52278646	52278648	chr3:52278646..52278648,chr3:52278556..52278719,-;peak:chr3:52278646..52278647,-;peakCounts:2265.1	3646	-	52278646	ENST00000296490.8	ENSG00000164091.12	alternative	ENSG00000164091	WDR82
0.0531255	3.67861	18.8949	0.000265745	0.0467725	rDPI_11663	chr12	48789056	48789075	chr12:48789056..48789075,chr12:48788881..48789132,-;peak:chr12:48789061..48789062,-;peakCounts:3171.6	10029	-	48789061	ENST00000357869.8	ENSG00000174233.12	promoter	ENSG00000174233	ADCY6
0.0711192	4.35136	18.8746	0.000267255	0.0469119	rDPI_12486	chr12	76031595	76031597	chr12:76031595..76031597,chr12:76031397..76031766,-;peak:chr12:76031595..76031596,-;peakCounts:26864.1	30361	-	76031595	ENST00000602540.5	ENSG00000139289.14	promoter	ENSG00000139289	PHLDA1
0.0376156	3.322	18.8571	0.000268568	0.0469865	rDPI_25665	chr19	18941212	18941241	chr19:18941212..18941241,chr19:18941096..18941295,-;peak:chr19:18941217..18941218,-;peakCounts:576	3633	-	18941217	ENST00000392351.8	ENSG00000051128.19	promoter	ENSG00000051128	HOMER3
-0.0374332	1.33435	18.8332	0.00027037	0.0469865	rDPI_19737	chr16	51646438	51646469	chr16:51646438..51646469,+	723	+	51646452	ENST00000562726.1	ENSG00000224578.5	enhancer	ENSG00000224578	HNRNPA1P48
-0.0426041	3.33305	18.8185	0.000271486	0.0469865	rDPI_54994	chrX	153724856	153724858	chrX:153724856..153724858,chrX:153724783..153724967,+;peak:chrX:153724856..153724857,+;peakCounts:3356.1	3859	+	153724856	ENST00000218104.6	ENSG00000101986.12	promoter	ENSG00000101986	ABCD1
0.0804004	1.68023	18.807	0.000272359	0.0469865	rDPI_39788	chr4	73740569	73740570	chr4:73740569..73740570,chr4:73740525..73740725,+;peak:chr4:73740569..73740570,+;peakCounts:15387.3	17097	+	73740569	ENST00000483500.1	ENSG00000169429.11	promoter	ENSG00000169429	CXCL8
-0.0406219	3.45434	18.8065	0.000272399	0.0469865	rDPI_13564	chr12	123973212	123973220	chr12:123973212..123973220,chr12:123973043..123973333,+;peak:chr12:123973215..123973216,+;peakCounts:2497.2	4657	+	123973215	ENST00000392404.7	ENSG00000179195.16	alternative	ENSG00000179195	ZNF664
-0.0367959	3.76647	18.7978	0.000273059	0.0469865	rDPI_52876	chr9	129488662	129488691	chr9:129488662..129488691,chr9:129488598..129488935,+;peak:chr9:129488680..129488681,+;peakCounts:1424.7	5613	+	129488680	ENST00000656664.1	ENSG00000204054.14	promoter	ENSG00000204054	NA
-0.0559089	3.72863	18.7972	0.000273104	0.0469865	rDPI_12737	chr12	101680386	101680398	chr12:101680386..101680398,chr12:101680124..101680525,+;peak:chr12:101680390..101680391,+;peakCounts:2323.4	4148	+	101680390	ENST00000549608.1	ENSG00000196091.15	alternative	ENSG00000196091	MYBPC1
0.0356013	2.16627	18.7929	0.000273437	0.0469865	rDPI_1549	chr1	43979226	43979230	chr1:43979226..43979230,chr1:43979177..43979365,+;peak:chr1:43979228..43979229,+;peakCounts:718.4	3257	+	43979228	ENST00000481924.2	ENSG00000117411.18	alternative	ENSG00000117411	B4GALT2
-0.0505504	5.09211	18.7657	0.000275525	0.047221	rDPI_10626	chr11	125569473	125569478	chr11:125569473..125569478,chr11:125569378..125569589,+;peak:chr11:125569477..125569478,+;peakCounts:9141.3	11682	+	125569477	ENST00000529765.5	ENSG00000149547.15	alternative	ENSG00000149547	EI24
0.0420496	4.23734	18.7336	0.000278018	0.0475236	rDPI_22425	chr17	50707882	50707900	chr17:50707882..50707900,chr17:50707530..50707991,-;peak:chr17:50707891..50707892,-;peakCounts:6052.5	11675	-	50707891	ENST00000285243.7	ENSG00000154945.7	promoter	ENSG00000154945	ANKRD40
0.0461367	3.59329	18.6914	0.00028133	0.0477192	rDPI_17348	chr15	45378544	45378545	chr15:45378544..45378545,chr15:45378456..45378549,-;peak:chr15:45378544..45378545,-;peakCounts:5376.6	5974	-	45378544	ENST00000396659.8	ENSG00000171766.17	promoter	ENSG00000171766	GATM
0.029325	5.36155	18.6901	0.000281436	0.0477192	rDPI_3854	chr1	170074478	170074512	chr1:170074478..170074512,chr1:170074451..170074810,-;peak:chr1:170074495..170074496,-;peakCounts:5793.3	24655	-	170074495	ENST00000367767.5	ENSG00000075945.13	promoter	ENSG00000075945	KIFAP3
-0.0269166	1.47809	18.6829	0.000282005	0.0477192	rDPI_35727	chr22	49918453	49918459	chr22:49918453..49918459,chr22:49918286..49918472,-;peak:chr22:49918458..49918459,-;peakCounts:436.9	692	-	49918458	ENST00000330817.11	ENSG00000182858.14	alternative	ENSG00000182858	ALG12
0.0416205	4.08622	18.6819	0.000282085	0.0477192	rDPI_50830	chr8	133297252	133297254	chr8:133297252..133297254,chr8:133297157..133297259,-;peak:chr8:133297252..133297253,-;peakCounts:3419.1	5860	-	133297252	ENST00000323851.13	ENSG00000104419.17	promoter	ENSG00000104419	NDRG1
-0.0485461	5.35694	18.6354	0.000285794	0.04799	rDPI_48541	chr7	123557817	123557819	chr7:123557817..123557819,chr7:123557634..123557975,-;peak:chr7:123557818..123557819,-;peakCounts:3987.8	13768	-	123557818	ENST00000355749.7	ENSG00000128609.16	alternative	ENSG00000128609	NDUFA5
-0.0328224	2.97119	18.6123	0.000287654	0.04799	rDPI_53672	chrX	16719626	16719629	chrX:16719626..16719629,chrX:16719545..16719784,+;peak:chrX:16719627..16719628,+;peakCounts:1901.5	3358	+	16719627	ENST00000380155.4	ENSG00000169895.6	alternative	ENSG00000169895	SYAP1
-0.037564	7.2212	18.6116	0.000287711	0.04799	rDPI_48043	chr7	96709841	96709852	chr7:96709841..96709852,chr7:96709717..96709923,-;peak:chr7:96709846..96709847,-;peakCounts:39262.5	68566	-	96709846	ENST00000488005.5	ENSG00000127922.9	promoter	ENSG00000127922	SEM1
-0.0372313	1.43922	18.6109	0.000287772	0.04799	rDPI_32838	chr20	4024094	4024108	chr20:4024094..4024108,chr20:4024092..4024161,+;peak:chr20:4024102..4024103,+;peakCounts:347.4	1073	+	4024102	ENST00000427242.1	ENSG00000226608.3	not_classified	ENSG00000226608	NA
0.0594762	6.18677	18.6022	0.000288479	0.04799	rDPI_44685	chr6	32439882	32439899	chr6:32439882..32439899,chr6:32439823..32439996,+;peak:chr6:32439887..32439888,+;peakCounts:21580.2	46030	+	32439887	ENST00000395388.7	ENSG00000204287.14	promoter	ENSG00000204287	HLA-DRA
-0.0557972	6.51937	18.6008	0.000288588	0.04799	rDPI_14914	chr14	23393791	23393832	chr14:23393791..23393832,chr14:23393670..23393912,-;peak:chr14:23393805..23393806,-;peakCounts:2207.2	22748	-	23393805	ENST00000362287.2	ENSG00000199157.2	alternative	ENSG00000199157	MIR208A
0.0284211	1.52436	18.589	0.000289546	0.04799	rDPI_48912	chr7	139778101	139778113	chr7:139778101..139778113,chr7:139778084..139778196,-;peak:chr7:139778108..139778109,-;peakCounts:633.6	1153	-	139778108	ENST00000406875.8	ENSG00000064393.16	alternative	ENSG00000064393	HIPK2
0.0397151	4.34234	18.5883	0.000289611	0.04799	rDPI_25410	chr19	14433318	14433328	chr19:14433318..14433328,chr19:14433275..14433526,+;peak:chr19:14433323..14433324,+;peakCounts:11306.7	17907	+	14433323	ENST00000585839.5	ENSG00000123143.13	alternative	ENSG00000123143	PKN1
-0.0644355	3.21958	18.5798	0.000290301	0.04799	rDPI_19867	chr16	57284667	57284673	chr16:57284667..57284673,chr16:57284624..57284730,-;peak:chr16:57284672..57284673,-;peakCounts:1740.6	2223	-	57284672	ENST00000219207.10	ENSG00000102934.10	promoter	ENSG00000102934	PLLP
-0.0360658	1.69996	18.5606	0.000291873	0.048118	rDPI_8086	chr11	6419450	6419461	chr11:6419450..6419461,chr11:6419362..6419532,-;peak:chr11:6419453..6419454,-;peakCounts:188.9	787	-	6419453	ENST00000311051.7	ENSG00000166313.19	alternative	ENSG00000166313	APBB1
-0.0512055	3.31946	18.5524	0.000292549	0.048118	rDPI_51147	chr9	547114	547123	chr9:547114..547123,chr9:547041..547250,+;peak:chr9:547117..547118,+;peakCounts:1555.2	2565	+	547117	ENST00000662822.1	ENSG00000226403.2	promoter	ENSG00000226403	NA
-0.039733	2.35342	18.5282	0.000294557	0.0482581	rDPI_1094	chr1	29230943	29230946	chr1:29230943..29230946,chr1:29230829..29230971,-;peak:chr1:29230943..29230944,-;peakCounts:569.7	1597	-	29230943	ENST00000484012.5	ENSG00000116353.16	alternative	ENSG00000116353	MECR
0.0880898	2.28197	18.5243	0.000294878	0.0482581	rDPI_46980	chr7	22727195	22727201	chr7:22727195..22727201,chr7:22727140..22727285,+;peak:chr7:22727200..22727201,+;peakCounts:6683.4	8602	+	22727200	ENST00000485300.1	ENSG00000136244.12	promoter	ENSG00000136244	IL6
0.0260982	1.47882	20.797	0.000296662	0.0484285	rDPI_46582	chr6	167826864	167826867	chr6:167826864..167826867,chr6:167826838..167827005,+;peak:chr6:167826865..167826866,+;peakCounts:315.9	629	+	167826865	ENST00000400825.8	ENSG00000130396.20	alternative	ENSG00000130396	AFDN
0.0485016	2.62538	18.4747	0.000299039	0.0486949	rDPI_2669	chr1	113168959	113168960	chr1:113168959..113168960,+	15795	+	113168959	ENST00000457967.1	ENSG00000233839.1	promoter	ENSG00000233839	RPS19P2
0.0461756	3.05604	18.4597	0.000300304	0.0487039	rDPI_2465	chr1	108560095	108560101	chr1:108560095..108560101,chr1:108560011..108560160,+;peak:chr1:108560100..108560101,+;peakCounts:4771.8	5738	+	108560100	ENST00000370035.8	ENSG00000162636.16	promoter	ENSG00000162636	FAM102B
0.0353249	2.95454	18.4564	0.000300586	0.0487039	rDPI_9012	chr11	61581069	61581081	chr11:61581069..61581081,chr11:61580987..61581232,-;peak:chr11:61581074..61581075,-;peakCounts:1882.8	3532	-	61581074	ENST00000539008.6	ENSG00000011347.10	promoter	ENSG00000011347	SYT7
0.0394702	1.56289	18.4415	0.00030185	0.0487876	rDPI_7763	chr10	133373702	133373709	chr10:133373702..133373709,chr10:133373663..133373769,-;peak:chr10:133373702..133373703,-;peakCounts:523.8	1089	-	133373702	ENST00000368547.4	ENSG00000127884.5	alternative	ENSG00000127884	ECHS1
-0.0511494	2.58456	18.4281	0.000302997	0.0488521	rDPI_28227	chr2	39665478	39665486	chr2:39665478..39665486,chr2:39665334..39665501,+;peak:chr2:39665484..39665485,+;peakCounts:893.7	1715	+	39665484	ENST00000482239.5	ENSG00000152154.11	promoter	ENSG00000152154	TMEM178A
-0.0293463	3.77024	18.3824	0.000306946	0.0493199	rDPI_9435	chr11	65662940	65662949	chr11:65662940..65662949,chr11:65662794..65663012,-;peak:chr11:65662944..65662945,-;peakCounts:2694.9	4713	-	65662944	ENST00000532776.5	ENSG00000173039.19	alternative	ENSG00000173039	RELA
0.0470392	2.87042	18.377	0.000307409	0.0493199	rDPI_23549	chr18	8609420	8609425	chr18:8609420..8609425,chr18:8609371..8609952,+;peak:chr18:8609421..8609422,+;peakCounts:3068.1	8876	+	8609421	ENST00000649141.1	ENSG00000206418.4	alternative	ENSG00000206418	RAB12
0.0295681	3.5964	18.3605	0.00030885	0.0494296	rDPI_14740	chr14	22589194	22589196	chr14:22589194..22589196,chr14:22588962..22589285,-;peak:chr14:22589195..22589196,-;peakCounts:1846.5	6205	-	22589195	ENST00000535847.1	ENSG00000129562.11	alternative	ENSG00000129562	DAD1
0.0266276	1.61835	18.3481	0.000309939	0.0494747	rDPI_46842	chr7	6706907	6706913	chr7:6706907..6706913,chr7:6706847..6706991,-;peak:chr7:6706909..6706910,-;peakCounts:619.4	1075	-	6706909	ENST00000342651.9	ENSG00000164631.19	alternative	ENSG00000164631	ZNF12
0.0394039	5.80903	18.3401	0.000310647	0.0494747	rDPI_21241	chr17	17042455	17042468	chr17:17042455..17042468,chr17:17042352..17042722,+;peak:chr17:17042459..17042460,+;peakCounts:12873.9	46775	+	17042459	ENST00000651222.2	ENSG00000133030.22	alternative	ENSG00000133030	MPRIP
0.0393214	1.73927	18.3168	0.0003127	0.0495722	rDPI_20312	chr16	77788564	77788567	chr16:77788564..77788567,chr16:77788514..77788629,+;peak:chr16:77788564..77788565,+;peakCounts:627.8	1096	+	77788564	ENST00000302536.3	ENSG00000171724.3	alternative	ENSG00000171724	VAT1L
-0.0320561	1.92619	18.316	0.000312778	0.0495722	rDPI_48953	chr7	141301737	141301739	chr7:141301737..141301739,chr7:141301598..141301845,+;peak:chr7:141301737..141301738,+;peakCounts:422.5	1409	+	141301737	ENST00000568872.1	ENSG00000261624.1	alternative	ENSG00000261624	NDUFB10P2
-0.0388219	4.27067	18.2999	0.000314209	0.0496784	rDPI_5006	chr1	228487382	228487384	chr1:228487382..228487384,chr1:228487343..228487462,+;peak:chr1:228487382..228487383,+;peakCounts:9480.8	11527	+	228487382	ENST00000305943.9	ENSG00000168159.14	alternative	ENSG00000168159	RNF187
0.0516035	3.2284	18.2639	0.000317435	0.0499699	rDPI_44726	chr6	33073623	33073625	chr6:33073623..33073625,chr6:33073584..33073696,-;peak:chr6:33073623..33073624,-;peakCounts:2207.9	3807	-	33073623	ENST00000463066.1	ENSG00000231389.7	alternative	ENSG00000231389	HLA-DPA1
0.038447	2.63647	18.2623	0.000317583	0.0499699	rDPI_34738	chr22	19941772	19941778	chr22:19941772..19941778,chr22:19941727..19941901,+;peak:chr22:19941772..19941773,+;peakCounts:2168.6	3866	+	19941772	ENST00000361682.11	ENSG00000093010.15	alternative	ENSG00000093010	COMT
-0.061438	3.78721	18.2509	0.00031861	0.0500111	rDPI_53361	chrM	5246	5254	chrM:5246..5254,chrM:5245..5581,+;peak:chrM:5246..5247,+;peakCounts:45543.6	65829	+	5246	ENST00000387382.1	ENSG00000210117.1	alternative	ENSG00000210117	NA
0.0364904	3.1552	18.2382	0.000319763	0.0500191	rDPI_22423	chr17	50707801	50707819	chr17:50707801..50707819,chr17:50707530..50707991,-;peak:chr17:50707813..50707814,-;peakCounts:396.5	5472	-	50707813	ENST00000285243.7	ENSG00000154945.7	alternative	ENSG00000154945	ANKRD40
-0.0509053	3.96793	18.2294	0.00032056	0.0500191	rDPI_20055	chr16	67481152	67481161	chr16:67481152..67481161,chr16:67481033..67481238,-;peak:chr16:67481157..67481158,-;peakCounts:2484.5	4991	-	67481157	ENST00000290949.8	ENSG00000159720.12	alternative	ENSG00000159720	ATP6V0D1
0.0447391	3.00684	18.2251	0.000320959	0.0500191	rDPI_33749	chr20	51768624	51768665	chr20:51768624..51768665,chr20:51768321..51768728,-;peak:chr20:51768636..51768637,-;peakCounts:846	3567	-	51768636	ENST00000338821.6	ENSG00000054793.14	promoter	ENSG00000054793	ATP9A
0.0495021	4.45497	18.1915	0.000324038	0.0503696	rDPI_23551	chr18	8609457	8609465	chr18:8609457..8609465,chr18:8609371..8609952,+;peak:chr18:8609459..8609460,+;peakCounts:4896.1	16605	+	8609459	ENST00000329286.7	ENSG00000206418.4	alternative	ENSG00000206418	RAB12
0.0302954	6.67512	18.1823	0.000324889	0.0503696	rDPI_42324	chr5	95822616	95822779	chr5:95822616..95822779,chr5:95822616..95822779,-	70342	-	95822726	ENST00000508780.5	ENSG00000173221.14	promoter	ENSG00000173221	GLRX
-0.026477	3.97022	18.1708	0.000325956	0.0503696	rDPI_36737	chr3	48473123	48473134	chr3:48473123..48473134,chr3:48473024..48473234,-;peak:chr3:48473129..48473130,-;peakCounts:996.8	4584	-	48473129	ENST00000460758.1	ENSG00000164054.15	alternative	ENSG00000164054	SHISA5
0.0300338	5.72734	18.1671	0.000326294	0.0503696	rDPI_38443	chr3	160565566	160565572	chr3:160565566..160565572,chr3:160565260..160565629,-;peak:chr3:160565571..160565572,-;peakCounts:38516.4	47256	-	160565571	ENST00000334256.9	ENSG00000186432.10	alternative	ENSG00000186432	KPNA4
-0.037495	1.5954	18.1323	0.000329549	0.0506432	rDPI_127	chr1	1505127	1505143	chr1:1505127..1505143,chr1:1505047..1505169,+;peak:chr1:1505131..1505132,+;peakCounts:271.8	918	+	1505131	ENST00000641679.1	ENSG00000284740.1	enhancer	ENSG00000284740	NA
-0.045129	1.34225	18.1316	0.000329617	0.0506432	rDPI_45711	chr6	108907817	108907819	chr6:108907817..108907819,-	853	-	108907818	ENST00000447543.1	ENSG00000228834.1	promoter	ENSG00000228834	NA
-0.0294439	1.24992	18.0869	0.000333844	0.0510768	rDPI_7121	chr10	100347135	100347146	chr10:100347135..100347146,chr10:100347069..100347269,+;peak:chr10:100347141..100347142,+;peakCounts:44.4	303	+	100347141	ENST00000370355.3	ENSG00000099194.6	alternative	ENSG00000099194	SCD
0.0408196	2.18922	18.0852	0.000334004	0.0510768	rDPI_46493	chr6	159693492	159693498	chr6:159693492..159693498,chr6:159693444..159693617,-;peak:chr6:159693492..159693493,-;peakCounts:2295	2740	-	159693492	ENST00000337404.8	ENSG00000112096.19	enhancer	ENSG00000112096	SOD2
-0.0314223	3.91614	18.0746	0.000335022	0.0511128	rDPI_16856	chr15	26395078	26395102	chr15:26395078..26395102,chr15:26394967..26395213,+;peak:chr15:26395089..26395090,+;peakCounts:511.5	3048	+	26395089	ENST00000670116.1	ENSG00000235160.2	alternative	ENSG00000235160	LINC02248
-0.0392119	4.33575	18.0529	0.000337103	0.0513104	rDPI_20214	chr16	71895507	71895521	chr16:71895507..71895521,chr16:71895474..71895568,+;peak:chr16:71895519..71895520,+;peakCounts:1774.3	7915	+	71895519	ENST00000424485.6	ENSG00000182149.21	promoter	ENSG00000182149	IST1
0.0628878	6.3277	18.0258	0.000339723	0.0515598	rDPI_6454	chr10	73422740	73422741	chr10:73422740..73422741,-	45272	-	73422740	ENST00000440913.1	ENSG00000229659.1	promoter	ENSG00000229659	RPL26P6
-0.0411899	4.81663	18.0197	0.000340321	0.0515598	rDPI_52002	chr9	93134251	93134257	chr9:93134251..93134257,chr9:93134196..93134352,-;peak:chr9:93134251..93134252,-;peakCounts:10111.5	11848	-	93134251	ENST00000375446.5	ENSG00000131669.10	promoter	ENSG00000131669	NINJ1
-0.0329761	4.75526	17.9735	0.000344844	0.0519162	rDPI_15963	chr14	67674598	67674603	chr14:67674598..67674603,chr14:67674447..67674701,-;peak:chr14:67674598..67674599,-;peakCounts:4134.1	9199	-	67674598	ENST00000216456.6	ENSG00000100568.11	alternative	ENSG00000100568	VTI1B
0.0251405	2.55266	17.9681	0.000345379	0.0519162	rDPI_12034	chr12	56104595	56104598	chr12:56104595..56104598,chr12:56104478..56104782,+;peak:chr12:56104596..56104597,+;peakCounts:2324.8	3906	+	56104596	ENST00000303305.11	ENSG00000170515.14	alternative	ENSG00000170515	PA2G4
0.0363279	5.746	17.9568	0.000346496	0.0519162	rDPI_20429	chr16	87392334	87392339	chr16:87392334..87392339,chr16:87392272..87392413,+;peak:chr16:87392336..87392337,+;peakCounts:44379.9	56674	+	87392336	ENST00000565788.1	ENSG00000140941.14	promoter	ENSG00000140941	MAP1LC3B
-0.0307673	2.48668	17.9561	0.00034657	0.0519162	rDPI_22069	chr17	44066628	44066631	chr17:44066628..44066631,chr17:44066599..44066701,-;peak:chr17:44066629..44066630,-;peakCounts:575.8	1724	-	44066629	ENST00000585388.2	ENSG00000161654.10	alternative	ENSG00000161654	LSM12
0.0636106	3.77636	17.9526	0.000346916	0.0519162	rDPI_8303	chr11	14359144	14359150	chr11:14359144..14359150,chr11:14359028..14359222,-;peak:chr11:14359144..14359145,-;peakCounts:9557	13221	-	14359144	ENST00000532950.5	ENSG00000133818.14	alternative	ENSG00000133818	RRAS2
0.0413946	3.40451	17.9458	0.000347592	0.0519162	rDPI_23644	chr18	12657966	12657988	chr18:12657966..12657988,chr18:12657835..12658123,-;peak:chr18:12657982..12657983,-;peakCounts:989.9	6143	-	12657982	ENST00000410092.7	ENSG00000134278.15	promoter	ENSG00000134278	SPIRE1
-0.0305773	2.81536	17.9393	0.000348239	0.0519162	rDPI_32717	chr20	1118626	1118629	chr20:1118626..1118629,chr20:1118574..1118759,+;peak:chr20:1118627..1118628,+;peakCounts:1157.2	2531	+	1118627	ENST00000478004.1	ENSG00000125818.18	alternative	ENSG00000125818	PSMF1
0.0339721	1.72815	17.9193	0.000350239	0.0519956	rDPI_52124	chr9	98796534	98796556	chr9:98796534..98796556,chr9:98796498..98796559,-;peak:chr9:98796539..98796540,-;peakCounts:385.2	1055	-	98796539	ENST00000353234.5	ENSG00000165138.18	promoter	ENSG00000165138	ANKS6
0.0515226	4.81448	17.9181	0.000350364	0.0519956	rDPI_45033	chr6	41735559	41735625	chr6:41735559..41735625,chr6:41735369..41735642,-;peak:chr6:41735608..41735609,-;peakCounts:2755.8	15710	-	41735608	ENST00000373033.6	ENSG00000112561.19	promoter	ENSG00000112561	TFEB
-0.0346151	1.21086	17.8986	0.00035233	0.0521181	rDPI_37727	chr3	121835034	121835043	chr3:121835034..121835043,chr3:121834963..121835102,-;peak:chr3:121835038..121835039,-;peakCounts:105.9	553	-	121835038	ENST00000349820.10	ENSG00000173226.17	alternative	ENSG00000173226	IQCB1
-0.0608906	6.72298	17.8941	0.000352786	0.0521181	rDPI_1194	chr1	32336232	32336234	chr1:32336232..32336234,chr1:32336200..32336271,-;peak:chr1:32336233..32336234,-;peakCounts:25909.2	34089	-	32336233	ENST00000329421.8	ENSG00000175130.7	promoter	ENSG00000175130	MARCKSL1
0.0243876	3.14796	17.8841	0.000353797	0.0521496	rDPI_28857	chr2	73214240	73214252	chr2:73214240..73214252,chr2:73214222..73214361,+;peak:chr2:73214245..73214246,+;peakCounts:3509.1	5657	+	73214245	ENST00000389501.9	ENSG00000135632.12	promoter	ENSG00000135632	SMYD5
-0.0274824	1.24707	18.1455	0.000354602	0.0521505	rDPI_43522	chr5	168616619	168616627	chr5:168616619..168616627,chr5:168616618..168616678,+;peak:chr5:168616621..168616622,+;peakCounts:418.5	651	+	168616621	ENST00000522551.1	ENSG00000233913.7	alternative	ENSG00000233913	RPL10P9
0.0352169	1.82174	17.8682	0.000355415	0.0521526	rDPI_29245	chr2	100322209	100322215	chr2:100322209..100322215,chr2:100322096..100322239,-;peak:chr2:100322214..100322215,-;peakCounts:1254.6	1634	-	100322214	ENST00000393437.8	ENSG00000170500.13	alternative	ENSG00000170500	LONRF2
-0.0524701	5.26611	17.8546	0.000356804	0.052239	rDPI_48396	chr7	111091122	111091131	chr7:111091122..111091131,chr7:111091000..111091177,+;peak:chr7:111091130..111091131,+;peakCounts:4907.7	10285	+	111091130	ENST00000308478.10	ENSG00000173114.13	promoter	ENSG00000173114	LRRN3
0.0426807	3.19221	17.8129	0.00036111	0.0527131	rDPI_3312	chr1	154558673	154558692	chr1:154558673..154558692,chr1:154558614..154558821,-;peak:chr1:154558677..154558678,-;peakCounts:1211.6	5708	-	154558677	ENST00000292211.5	ENSG00000160714.10	alternative	ENSG00000160714	UBE2Q1
-0.0292385	5.21598	17.8077	0.000361657	0.0527131	rDPI_13565	chr12	123973223	123973250	chr12:123973223..123973250,chr12:123973043..123973333,+;peak:chr12:123973227..123973228,+;peakCounts:4480.2	24427	+	123973227	ENST00000389727.8	ENSG00000178882.15	promoter	ENSG00000178882	RFLNA
-0.0427452	4.20435	17.795	0.000362977	0.0527876	rDPI_14840	chr14	23386488	23386498	chr14:23386488..23386498,chr14:23386285..23386629,-;peak:chr14:23386492..23386493,-;peakCounts:662.2	5236	-	23386492	ENST00000362287.2	ENSG00000199157.2	alternative	ENSG00000199157	MIR208A
-0.0352859	1.82894	17.7475	0.000367975	0.0532013	rDPI_5854	chr10	28532699	28532708	chr10:28532699..28532708,chr10:28532555..28532830,-;peak:chr10:28532703..28532704,-;peakCounts:207.1	548	-	28532703	ENST00000527986.5	ENSG00000254635.6	alternative	ENSG00000254635	NA
-0.0340354	5.77816	17.736	0.000369193	0.0532013	rDPI_2965	chr1	149812372	149812374	chr1:149812372..149812374,chr1:149812364..149812435,-;peak:chr1:149812373..149812374,-;peakCounts:16787.7	19161	-	149812373	ENST00000545683.1	ENSG00000203814.6	promoter	ENSG00000203814	H2BC18
-0.0410141	1.47201	17.734	0.000369411	0.0532013	rDPI_38494	chr3	169709272	169709280	chr3:169709272..169709280,+	1281	+	169709279	ENST00000484597.1	ENSG00000244381.1	promoter	ENSG00000244381	NA
-0.0342993	4.43689	17.7274	0.000370117	0.0532013	rDPI_49576	chr8	22565727	22565771	chr8:22565727..22565771,chr8:22565652..22565862,+;peak:chr8:22565746..22565747,+;peakCounts:2042.1	8832	+	22565746	ENST00000521554.4	ENSG00000120896.13	promoter	ENSG00000120896	SORBS3
-0.0408417	2.62361	17.7242	0.000370458	0.0532013	rDPI_25627	chr19	18438130	18438131	chr19:18438130..18438131,chr19:18438095..18438196,-;peak:chr19:18438130..18438131,-;peakCounts:5335.2	5928	-	18438130	ENST00000338128.13	ENSG00000105655.19	promoter	ENSG00000105655	ISYNA1
-0.0274861	1.84834	17.7121	0.000371749	0.0532013	rDPI_41264	chr5	693336	693344	chr5:693336..693344,chr5:693291..693414,-;peak:chr5:693337..693338,-;peakCounts:234	771	-	693337	ENST00000360578.7	ENSG00000171368.12	alternative	ENSG00000171368	TPPP
0.0478386	1.16809	17.7121	0.000371753	0.0532013	rDPI_46005	chr6	125919298	125919307	chr6:125919298..125919307,chr6:125919186..125919366,+;peak:chr6:125919303..125919304,+;peakCounts:531.9	1065	+	125919303	ENST00000444128.2	ENSG00000111912.20	alternative	ENSG00000111912	NCOA7
0.046206	4.49735	17.6965	0.000373426	0.0532013	rDPI_32037	chr2	216633479	216633495	chr2:216633479..216633495,chr2:216633340..216633960,+;peak:chr2:216633494..216633495,+;peakCounts:10241	21590	+	216633494	ENST00000490362.1	ENSG00000115457.10	alternative	ENSG00000115457	IGFBP2
-0.0407097	4.6738	17.6849	0.000374675	0.0532013	rDPI_4404	chr1	202958310	202958313	chr1:202958310..202958313,chr1:202958184..202958398,-;peak:chr1:202958312..202958313,-;peakCounts:6166.7	8309	-	202958312	ENST00000340990.10	ENSG00000159346.13	alternative	ENSG00000159346	ADIPOR1
0.0247184	2.97904	17.6733	0.000375939	0.0532013	rDPI_12462	chr12	71754895	71754896	chr12:71754895..71754896,chr12:71754774..71755281,+;peak:chr12:71754895..71754896,+;peakCounts:3434.8	6658	+	71754895	ENST00000261263.5	ENSG00000080371.6	alternative	ENSG00000080371	RAB21
0.0422888	3.17445	17.6676	0.000376552	0.0532013	rDPI_32036	chr2	216633457	216633466	chr2:216633457..216633466,chr2:216633340..216633960,+;peak:chr2:216633461..216633462,+;peakCounts:3098	5941	+	216633461	ENST00000490362.1	ENSG00000115457.10	alternative	ENSG00000115457	IGFBP2
0.0385218	2.06197	17.6608	0.000377299	0.0532013	rDPI_19981	chr16	66696686	66696712	chr16:66696686..66696712,chr16:66696665..66696818,-;peak:chr16:66696694..66696695,-;peakCounts:281.6	1569	-	66696694	ENST00000330687.8	ENSG00000183723.13	alternative	ENSG00000183723	CMTM4
0.031325	3.21575	17.6569	0.000377725	0.0532013	rDPI_17491	chr15	52679380	52679389	chr15:52679380..52679389,chr15:52679145..52679417,-;peak:chr15:52679388..52679389,-;peakCounts:1728.4	5548	-	52679388	ENST00000566768.5	ENSG00000047346.12	alternative	ENSG00000047346	FAM214A
0.0378316	3.60345	17.6524	0.000378208	0.0532013	rDPI_33189	chr20	33443760	33443764	chr20:33443760..33443764,chr20:33443282..33443794,-;peak:chr20:33443763..33443764,-;peakCounts:3661.7	7078	-	33443763	ENST00000217381.3	ENSG00000101400.6	alternative	ENSG00000101400	SNTA1
0.0409055	4.91347	17.6505	0.000378419	0.0532013	rDPI_24821	chr19	6279947	6279967	chr19:6279947..6279967,chr19:6279891..6280038,-;peak:chr19:6279954..6279955,-;peakCounts:5165.1	15959	-	6279954	ENST00000252674.9	ENSG00000130382.9	promoter	ENSG00000130382	MLLT1
0.0297352	2.00765	17.6465	0.000378857	0.0532013	rDPI_23981	chr18	46917597	46917608	chr18:46917597..46917608,chr18:46917528..46917648,+;peak:chr18:46917602..46917603,+;peakCounts:1472.4	1786	+	46917602	ENST00000592005.5	ENSG00000167216.17	promoter	ENSG00000167216	KATNAL2
0.0388288	3.71002	17.6314	0.000380516	0.0532143	rDPI_43372	chr5	154190733	154190736	chr5:154190733..154190736,chr5:154190693..154190883,+;peak:chr5:154190733..154190734,+;peakCounts:3384.9	9185	+	154190733	ENST00000297107.11	ENSG00000164574.16	promoter	ENSG00000164574	GALNT10
0.0320923	4.20692	17.6254	0.000381177	0.0532143	rDPI_4505	chr1	205504683	205504715	chr1:205504683..205504715,chr1:205504538..205504866,+;peak:chr1:205504690..205504691,+;peakCounts:2109.3	11769	+	205504690	ENST00000462976.1	ENSG00000117266.16	alternative	ENSG00000117266	CDK18
0.0352238	6.60186	17.6234	0.000381395	0.0532143	rDPI_45217	chr6	46015705	46015711	chr6:46015705..46015711,chr6:46015484..46015928,-;peak:chr6:46015705..46015706,-;peakCounts:65955.6	78525	-	46015705	ENST00000642250.1	ENSG00000112782.19	promoter	ENSG00000112782	CLIC5
-0.0470429	5.32453	17.6082	0.000383075	0.0533348	rDPI_45433	chr6	73521030	73521032	chr6:73521030..73521032,chr6:73521024..73521280,-;peak:chr6:73521030..73521031,-;peakCounts:6300.9	8721	-	73521030	ENST00000309268.11	ENSG00000156508.19	promoter	ENSG00000156508	EEF1A1
-0.0393545	1.31988	17.5809	0.000386117	0.0536439	rDPI_34538	chr21	44107343	44107354	chr21:44107343..44107354,chr21:44107336..44107405,+;peak:chr21:44107350..44107351,+;peakCounts:421.7	1110	+	44107350	ENST00000456705.1	ENSG00000241945.8	alternative	ENSG00000241945	PWP2
-0.0295626	3.14704	17.5584	0.00038864	0.0537646	rDPI_9003	chr11	61392627	61392651	chr11:61392627..61392651,chr11:61392554..61392652,+;peak:chr11:61392638..61392639,+;peakCounts:868.5	3347	+	61392638	ENST00000544795.5	ENSG00000187049.10	promoter	ENSG00000187049	TMEM216
-0.0614055	3.90239	17.5497	0.00038962	0.0537646	rDPI_2291	chr1	91600118	91600120	chr1:91600118..91600120,+	19625	+	91600118	ENST00000439897.1	ENSG00000229067.1	promoter	ENSG00000229067	NA
-0.031094	1.86583	17.5443	0.000390224	0.0537646	rDPI_54836	chrX	135520655	135520661	chrX:135520655..135520661,chrX:135520583..135520680,+;peak:chrX:135520660..135520661,+;peakCounts:693	842	+	135520660	ENST00000370752.4	ENSG00000165359.16	promoter	ENSG00000165359	INTS6L
-0.0314777	1.52394	17.5438	0.000390279	0.0537646	rDPI_41488	chr5	33162224	33162233	chr5:33162224..33162233,chr5:33162220..33162285,+;peak:chr5:33162225..33162226,+;peakCounts:663.3	1351	+	33162225	ENST00000467270.1	ENSG00000240376.1	alternative	ENSG00000240376	RPS8P8
0.0655642	2.47566	17.526	0.000392308	0.0539303	rDPI_50242	chr8	78591224	78591238	chr8:78591224..78591238,chr8:78591084..78591277,+;peak:chr8:78591231..78591232,+;peakCounts:5568.3	14799	+	78591231	ENST00000518467.1	ENSG00000171033.13	promoter	ENSG00000171033	PKIA
0.0399012	2.48459	17.5084	0.000394313	0.0540921	rDPI_50272	chr8	80874433	80874445	chr8:80874433..80874445,chr8:80874360..80874545,-;peak:chr8:80874439..80874440,-;peakCounts:2831.4	5435	-	80874439	ENST00000327835.7	ENSG00000164684.13	enhancer	ENSG00000164684	ZNF704
0.0305825	1.50395	17.4885	0.000396598	0.0542737	rDPI_34971	chr22	29072942	29072948	chr22:29072942..29072948,chr22:29072905..29073125,+;peak:chr22:29072942..29072943,+;peakCounts:105.6	1167	+	29072942	ENST00000400335.9	ENSG00000183762.13	alternative	ENSG00000183762	KREMEN1
0.0468327	6.50991	17.471	0.000398615	0.0542737	rDPI_49235	chr7	158829416	158829582	chr7:158829416..158829582,chr7:158829416..158829582,-	57965	-	158829509	ENST00000275418.13	ENSG00000117868.17	promoter	ENSG00000117868	ESYT2
-0.0356075	5.03195	17.4704	0.000398688	0.0542737	rDPI_14078	chr13	44373806	44373855	chr13:44373806..44373855,chr13:44373459..44373913,+;peak:chr13:44373852..44373853,+;peakCounts:2523.6	17025	+	44373852	ENST00000379179.8	ENSG00000151778.11	promoter	ENSG00000151778	SERP2
0.0348573	2.36921	17.4649	0.000399318	0.0542737	rDPI_53722	chrX	19991056	19991066	chrX:19991056..19991066,chrX:19990976..19991102,-;peak:chrX:19991060..19991061,-;peakCounts:609.4	1836	-	19991060	ENST00000383936.1	ENSG00000206663.1	enhancer	ENSG00000206663	NA
-0.0458593	3.74875	17.4608	0.000399792	0.0542737	rDPI_14909	chr14	23393709	23393717	chr14:23393709..23393717,chr14:23393670..23393912,-;peak:chr14:23393710..23393711,-;peakCounts:643.2	2870	-	23393710	ENST00000362287.2	ENSG00000199157.2	alternative	ENSG00000199157	MIR208A
-0.0306653	5.92842	17.4126	0.000405436	0.0549257	rDPI_54515	chrX	103607960	103607980	chrX:103607960..103607980,chrX:103607847..103608063,+;peak:chrX:103607975..103607976,+;peakCounts:6297.3	24987	+	103607975	ENST00000372627.10	ENSG00000196507.11	promoter	ENSG00000196507	TCEAL3
0.0631547	2.87258	17.3865	0.000408525	0.0551535	rDPI_7651	chr10	123891819	123891835	chr10:123891819..123891835,chr10:123891719..123891849,-;peak:chr10:123891834..123891835,-;peakCounts:988.2	2442	-	123891834	ENST00000241305.4	ENSG00000121898.13	promoter	ENSG00000121898	CPXM2
-0.0343062	2.1947	17.3841	0.000408807	0.0551535	rDPI_25051	chr19	10430799	10430829	chr19:10430799..10430829,chr19:10430706..10430833,+;peak:chr19:10430823..10430824,+;peakCounts:623.7	2656	+	10430823	ENST00000293683.9	ENSG00000065989.16	promoter	ENSG00000065989	PDE4A
-0.0544627	4.43624	17.3728	0.000410165	0.0552225	rDPI_14916	chr14	23393874	23393887	chr14:23393874..23393887,chr14:23393670..23393912,-;peak:chr14:23393876..23393877,-;peakCounts:867.2	5946	-	23393876	ENST00000362287.2	ENSG00000199157.2	alternative	ENSG00000199157	MIR208A
-0.042421	3.77011	17.3568	0.00041207	0.0552276	rDPI_40528	chr4	123396793	123396800	chr4:123396793..123396800,chr4:123396721..123396929,+;peak:chr4:123396795..123396796,+;peakCounts:4016.7	5781	+	123396795	ENST00000505319.5	ENSG00000164056.11	promoter	ENSG00000164056	SPRY1
-0.0367764	3.05548	17.3519	0.000412668	0.0552276	rDPI_8289	chr11	13277824	13277836	chr11:13277824..13277836,chr11:13277717..13277875,+;peak:chr11:13277829..13277830,+;peakCounts:950.4	3006	+	13277829	ENST00000480685.5	ENSG00000133794.20	promoter	ENSG00000133794	ARNTL
-0.028461	1.5154	17.333	0.000414945	0.0552276	rDPI_26097	chr19	37078454	37078459	chr19:37078454..37078459,chr19:37078408..37078496,+;peak:chr19:37078456..37078457,+;peakCounts:207.9	680	+	37078456	ENST00000589245.5	ENSG00000197050.11	alternative	ENSG00000197050	ZNF420
0.0501711	4.54579	17.3133	0.00041733	0.0552276	rDPI_8567	chr11	35139170	35139173	chr11:35139170..35139173,chr11:35139064..35139258,+;peak:chr11:35139171..35139172,+;peakCounts:10013.4	13893	+	35139171	ENST00000415148.6	ENSG00000026508.20	promoter	ENSG00000026508	CD44
0.119525	2.67366	17.3077	0.000418018	0.0552276	rDPI_37405	chr3	96617934	96617939	chr3:96617934..96617939,chr3:96617906..96617981,-;peak:chr3:96617936..96617937,-;peakCounts:72.2	1283	-	96617936	ENST00000600213.3	ENSG00000269028.3	promoter	ENSG00000269028	MTRNR2L2
-0.0404047	2.74147	17.3053	0.000418308	0.0552276	rDPI_26806	chr19	47515023	47515026	chr19:47515023..47515026,chr19:47514879..47515123,-;peak:chr19:47515025..47515026,-;peakCounts:1084.1	1656	-	47515025	ENST00000593761.5	ENSG00000105402.8	alternative	ENSG00000105402	NAPA
-0.0379422	1.57309	17.3037	0.000418507	0.0552276	rDPI_47914	chr7	91265510	91265619	chr7:91265510..91265619,chr7:91265510..91265619,+	562	+	91265612	ENST00000287934.4	ENSG00000157240.4	alternative	ENSG00000157240	FZD1
0.0243216	2.67086	17.3012	0.000418804	0.0552276	rDPI_55079	chrX	154444167	154444175	chrX:154444167..154444175,chrX:154444099..154444268,+;peak:chrX:154444169..154444170,+;peakCounts:833.2	2902	+	154444169	ENST00000464419.5	ENSG00000071859.15	alternative	ENSG00000071859	FAM50A
0.0253593	1.56241	17.2942	0.00041967	0.0552276	rDPI_8927	chr11	59615729	59615732	chr11:59615729..59615732,chr11:59615668..59615906,-;peak:chr11:59615730..59615731,-;peakCounts:834	1170	-	59615730	ENST00000263847.6	ENSG00000110048.12	alternative	ENSG00000110048	OSBP
-0.0402868	2.86275	17.2927	0.000419845	0.0552276	rDPI_53346	chrM	4664	4672	chrM:4664..4672,chrM:4656..4740,+;peak:chrM:4666..4667,+;peakCounts:8683.2	14297	+	4666	ENST00000361453.3	ENSG00000198763.3	alternative	ENSG00000198763	ND2
0.0297757	1.84483	17.2872	0.000420522	0.0552276	rDPI_4508	chr1	205504738	205504742	chr1:205504738..205504742,chr1:205504538..205504866,+;peak:chr1:205504741..205504742,+;peakCounts:441.3	1305	+	205504741	ENST00000506215.1	ENSG00000117266.16	alternative	ENSG00000117266	CDK18
-0.0369179	3.06301	17.2797	0.000421439	0.0552276	rDPI_21028	chr17	7589400	7589413	chr17:7589400..7589413,chr17:7589342..7589481,-;peak:chr17:7589403..7589404,-;peakCounts:630	1971	-	7589403	ENST00000538513.6	ENSG00000129194.8	alternative	ENSG00000129194	SOX15
0.0292783	2.1667	17.2786	0.000421576	0.0552276	rDPI_39456	chr4	39698164	39698170	chr4:39698164..39698170,chr4:39698104..39698387,+;peak:chr4:39698169..39698170,+;peakCounts:1801.2	4115	+	39698169	ENST00000503368.5	ENSG00000078140.14	alternative	ENSG00000078140	UBE2K
0.0374768	3.75526	17.271	0.00042252	0.0552276	rDPI_5793	chr10	22714589	22714612	chr10:22714589..22714612,chr10:22714331..22714631,-;peak:chr10:22714598..22714599,-;peakCounts:938.7	6183	-	22714598	ENST00000376573.9	ENSG00000150867.14	promoter	ENSG00000150867	PIP4K2A
-0.0381555	2.05709	17.2676	0.000422942	0.0552276	rDPI_49577	chr8	22565773	22565784	chr8:22565773..22565784,chr8:22565652..22565862,+;peak:chr8:22565778..22565779,+;peakCounts:406.1	1109	+	22565778	ENST00000521554.4	ENSG00000120896.13	alternative	ENSG00000120896	SORBS3
-0.0406076	2.89798	17.2554	0.000424444	0.0552276	rDPI_17958	chr15	72272549	72272560	chr15:72272549..72272560,chr15:72272507..72272684,-;peak:chr15:72272554..72272555,-;peakCounts:1097.1	1860	-	72272554	ENST00000569795.6	ENSG00000137817.17	promoter	ENSG00000137817	PARP6
0.0479965	2.64588	17.2543	0.000424581	0.0552276	rDPI_38871	chr3	194486843	194486854	chr3:194486843..194486854,chr3:194486780..194487059,-;peak:chr3:194486848..194486849,-;peakCounts:787.7	2231	-	194486848	ENST00000645319.2	ENSG00000133657.16	alternative	ENSG00000133657	ATP13A3
-0.0470219	6.01126	17.2435	0.000425931	0.0552333	rDPI_27351	chr19	55537093	55537113	chr19:55537093..55537113,chr19:55537050..55537201,-;peak:chr19:55537098..55537099,-;peakCounts:3100.5	11764	-	55537098	ENST00000413299.6	ENSG00000187550.9	promoter	ENSG00000187550	SBK2
-0.0324687	3.3021	17.2404	0.000426316	0.0552333	rDPI_41732	chr5	54310568	54310577	chr5:54310568..54310577,chr5:54310418..54310625,-;peak:chr5:54310573..54310574,-;peakCounts:2236.5	3347	-	54310573	ENST00000504924.6	ENSG00000185305.11	promoter	ENSG00000185305	ARL15
-0.0268383	3.14199	17.198	0.000431625	0.0556918	rDPI_9737	chr11	71929043	71929050	chr11:71929043..71929050,chr11:71928984..71929098,+;peak:chr11:71929047..71929048,+;peakCounts:1479.6	4103	+	71929047	ENST00000490867.5	ENSG00000137522.18	promoter	ENSG00000137522	RNF121
0.040558	3.66891	17.1948	0.000432041	0.0556918	rDPI_18617	chr16	381972	381986	chr16:381972..381986,chr16:381868..382020,-;peak:chr16:381978..381979,-;peakCounts:3629.7	8651	-	381978	ENST00000431232.7	ENSG00000129925.11	promoter	ENSG00000129925	PGAP6
0.0402519	1.69221	17.1866	0.000433076	0.0556918	rDPI_24408	chr19	1132216	1132229	chr19:1132216..1132229,chr19:1132114..1132310,-;peak:chr19:1132221..1132222,-;peakCounts:420.8	757	-	1132221	ENST00000438103.6	ENSG00000064932.16	promoter	ENSG00000064932	SBNO2
0.0352049	2.36079	17.1793	0.000433999	0.0556918	rDPI_42665	chr5	128965487	128965489	chr5:128965487..128965489,chr5:128965432..128965664,+;peak:chr5:128965488..128965489,+;peakCounts:922.2	2495	+	128965488	ENST00000262462.9	ENSG00000113396.13	alternative	ENSG00000113396	SLC27A6
-0.0509818	2.61816	17.1773	0.000434248	0.0556918	rDPI_6279	chr10	68632347	68632358	chr10:68632347..68632358,chr10:68632333..68632411,+;peak:chr10:68632352..68632353,+;peakCounts:7576.2	10846	+	68632352	ENST00000366529.4	ENSG00000213025.2	promoter	ENSG00000213025	NA
-0.0435138	1.71555	17.1717	0.000434972	0.0556918	rDPI_2659	chr1	112912832	112912837	chr1:112912832..112912837,chr1:112912819..112913059,-;peak:chr1:112912832..112912833,-;peakCounts:645.3	918	-	112912832	ENST00000481750.1	ENSG00000155380.13	enhancer	ENSG00000155380	SLC16A1
-0.0669426	8.27533	17.1505	0.000437673	0.055928	rDPI_47309	chr7	44065564	44065571	chr7:44065564..44065571,chr7:44065121..44065646,-;peak:chr7:44065567..44065568,-;peakCounts:57898.8	73875	-	44065567	ENST00000297283.4	ENSG00000164708.6	promoter	ENSG00000164708	PGAM2
-0.0276645	5.44934	17.1275	0.000440635	0.0561964	rDPI_27388	chr19	55675262	55675269	chr19:55675262..55675269,chr19:55675112..55675397,+;peak:chr19:55675267..55675268,+;peakCounts:11724.7	26237	+	55675267	ENST00000085079.11	ENSG00000063245.15	alternative	ENSG00000063245	EPN1
-0.038923	2.28459	17.1143	0.000442346	0.0563047	rDPI_52451	chr9	118083285	118083286	chr9:118083285..118083286,-	5099	-	118083285	ENST00000413759.1	ENSG00000234782.3	promoter	ENSG00000234782	NA
0.0439556	3.58589	17.1015	0.000444015	0.0563384	rDPI_43800	chr5	180292074	180292084	chr5:180292074..180292084,chr5:180291914..180292113,-;peak:chr5:180292083..180292084,-;peakCounts:3047.1	5718	-	180292083	ENST00000452135.7	ENSG00000050748.18	alternative	ENSG00000050748	MAPK9
-0.0595032	1.90707	17.0927	0.000445156	0.0563384	rDPI_34149	chr21	8443317	8443328	chr21:8443317..8443328,chr21:8443254..8443357,+;peak:chr21:8443323..8443324,+;peakCounts:366.3	1187	+	8443323	ENST00000619471.1	ENSG00000278189.1	alternative	ENSG00000278189	RNA5-8SN1
-0.0340471	1.6121	17.0919	0.000445258	0.0563384	rDPI_4642	chr1	209675741	209675759	chr1:209675741..209675759,chr1:209675649..209676173,+;peak:chr1:209675746..209675747,+;peakCounts:86.8	713	+	209675746	ENST00000367029.5	ENSG00000123689.6	alternative	ENSG00000123689	G0S2
-0.0336667	3.34799	17.0858	0.000446062	0.0563384	rDPI_3954	chr1	175192963	175193005	chr1:175192963..175193005,chr1:175192872..175193170,-;peak:chr1:175192987..175192988,-;peakCounts:849.6	3400	-	175192987	ENST00000563563.2	ENSG00000235750.10	alternative	ENSG00000235750	KIAA0040
-0.0425697	3.51321	17.0526	0.00045043	0.0567803	rDPI_52223	chr9	108626797	108626800	chr9:108626797..108626800,+	5150	+	108626799	ENST00000306634.3	ENSG00000169253.3	promoter	ENSG00000169253	NA
-0.135173	3.43365	17.0178	0.000455065	0.0572541	rDPI_20748	chr17	4641678	4641682	chr17:4641678..4641682,-	1393	-	4641678	ENST00000293761.8	ENSG00000161905.13	promoter	ENSG00000161905	ALOX15
-0.0386024	1.8951	17.009	0.000456236	0.057291	rDPI_18560	chr15	99733368	99733372	chr15:99733368..99733372,chr15:99733346..99733459,-;peak:chr15:99733370..99733371,-;peakCounts:448.8	731	-	99733370	ENST00000493256.1	ENSG00000183060.15	alternative	ENSG00000183060	LYSMD4
-0.0278867	3.47112	17.0017	0.000457218	0.0573041	rDPI_50659	chr8	117520729	117520754	chr8:117520729..117520754,chr8:117520694..117520785,+;peak:chr8:117520748..117520749,+;peakCounts:1206.9	4563	+	117520748	ENST00000519879.1	ENSG00000164758.7	promoter	ENSG00000164758	MED30
-0.0681551	1.43736	16.9743	0.000460927	0.0576583	rDPI_34100	chr21	8399087	8399095	chr21:8399087..8399095,chr21:8398977..8399105,+;peak:chr21:8399090..8399091,+;peakCounts:426.6	847	+	8399090	ENST00000613359.1	ENSG00000275215.1	alternative	ENSG00000275215	RNA5-8SN3
-0.0370381	1.85581	16.9638	0.000462348	0.0577254	rDPI_27237	chr19	54201519	54201527	chr19:54201519..54201527,chr19:54201486..54201546,+;peak:chr19:54201526..54201527,+;peakCounts:1404.9	3290	+	54201526	ENST00000441429.1	ENSG00000170889.14	enhancer	ENSG00000170889	RPS9
0.0439266	3.84933	16.9436	0.00046511	0.0579501	rDPI_26684	chr19	45792811	45792829	chr19:45792811..45792829,chr19:45792693..45792855,-;peak:chr19:45792823..45792824,-;peakCounts:1723.8	10652	-	45792823	ENST00000377735.7	ENSG00000185800.12	alternative	ENSG00000185800	DMWD
0.0284671	2.72041	16.9325	0.000466632	0.0579501	rDPI_43054	chr5	141417662	141417686	chr5:141417662..141417686,chr5:141417613..141417742,+;peak:chr5:141417677..141417678,+;peakCounts:1594.8	3523	+	141417677	ENST00000398594.4	ENSG00000254122.3	promoter	ENSG00000254122	PCDHGB7
0.048407	2.33957	16.9312	0.00046681	0.0579501	rDPI_53117	chr9	136410606	136410620	chr9:136410606..136410620,chr9:136410538..136410647,-;peak:chr9:136410614..136410615,-;peakCounts:1074.6	4087	-	136410614	ENST00000357365.8	ENSG00000165689.17	promoter	ENSG00000165689	ENTR1
-0.0291858	2.36473	16.9057	0.000470342	0.0582777	rDPI_42076	chr5	79612465	79612469	chr5:79612465..79612469,chr5:79612408..79612638,+;peak:chr5:79612468..79612469,+;peakCounts:1302.2	2336	+	79612468	ENST00000428308.6	ENSG00000164329.13	alternative	ENSG00000164329	TENT2
-0.046678	2.771	16.8796	0.000473971	0.0585308	rDPI_9545	chr11	66480236	66480247	chr11:66480236..66480247,chr11:66480202..66480306,-;peak:chr11:66480241..66480242,-;peakCounts:1742.4	2330	-	66480241	ENST00000525142.1	ENSG00000255517.6	promoter	ENSG00000255517	LOC101928069
0.0592019	6.89895	16.8748	0.000474643	0.0585308	rDPI_46487	chr6	159693241	159693248	chr6:159693241..159693248,chr6:159693142..159693361,-;peak:chr6:159693241..159693242,-;peakCounts:78133.5	146954	-	159693241	ENST00000538183.7	ENSG00000112096.19	promoter	ENSG00000112096	SOD2
-0.0480874	2.94176	16.8678	0.000475634	0.0585308	rDPI_12473	chr12	74537970	74537976	chr12:74537970..74537976,chr12:74537775..74538060,+;peak:chr12:74537975..74537976,+;peakCounts:3008.3	4964	+	74537975	ENST00000519948.4	ENSG00000253719.4	alternative	ENSG00000253719	ATXN7L3B
-0.0312976	3.39963	16.8654	0.00047597	0.0585308	rDPI_45655	chr6	105179986	105179994	chr6:105179986..105179994,chr6:105179850..105180324,-;peak:chr6:105179991..105179992,-;peakCounts:1051.2	4503	-	105179991	ENST00000474760.1	ENSG00000132429.10	alternative	ENSG00000132429	POPDC3
-0.0495797	3.8513	16.8454	0.000478785	0.058674	rDPI_20301	chr16	75647777	75647795	chr16:75647777..75647795,chr16:75647701..75647900,+;peak:chr16:75647781..75647782,+;peakCounts:1609.2	7149	+	75647781	ENST00000653858.1	ENSG00000166848.7	alternative	ENSG00000166848	TERF2IP
0.0309402	1.77247	16.844	0.000478981	0.058674	rDPI_13093	chr12	110468893	110468904	chr12:110468893..110468904,chr12:110468777..110468936,+;peak:chr12:110468898..110468899,+;peakCounts:650.7	1173	+	110468898	ENST00000377673.10	ENSG00000204856.12	alternative	ENSG00000204856	FAM216A
0.0283701	1.43305	16.8381	0.00047983	0.058674	rDPI_53116	chr9	136410582	136410589	chr9:136410582..136410589,chr9:136410538..136410647,-;peak:chr9:136410585..136410586,-;peakCounts:316.6	607	-	136410585	ENST00000371723.4	ENSG00000165689.17	alternative	ENSG00000165689	ENTR1
0.0280866	1.5954	16.8309	0.000480843	0.058688	rDPI_19808	chr16	56425522	56425525	chr16:56425522..56425525,chr16:56425406..56425614,-;peak:chr16:56425523..56425524,-;peakCounts:144.6	825	-	56425523	ENST00000290649.10	ENSG00000159461.15	alternative	ENSG00000159461	AMFR
0.0334366	2.06571	16.8226	0.000482024	0.0587108	rDPI_47523	chr7	65873154	65873172	chr7:65873154..65873172,chr7:65873074..65873434,+;peak:chr7:65873166..65873167,+;peakCounts:1744.2	2461	+	65873166	ENST00000648187.1	ENSG00000196715.7	alternative	ENSG00000196715	VKORC1L1
0.0364852	2.51698	16.8032	0.000484802	0.0587108	rDPI_1225	chr1	32901385	32901404	chr1:32901385..32901404,chr1:32901311..32901431,-;peak:chr1:32901400..32901401,-;peakCounts:694.8	2761	-	32901400	ENST00000329151.5	ENSG00000121900.19	promoter	ENSG00000121900	TMEM54
-0.0476606	7.77059	16.8006	0.000485178	0.0587108	rDPI_5373	chr1	244835681	244835702	chr1:244835681..244835702,chr1:244835561..244835747,+;peak:chr1:244835695..244835696,+;peakCounts:21074.4	87913	+	244835695	ENST00000498262.1	ENSG00000203667.10	promoter	ENSG00000203667	COX20
0.0465734	5.27419	16.8004	0.0004852	0.0587108	rDPI_24598	chr19	3094362	3094368	chr19:3094362..3094368,chr19:3094306..3094726,+;peak:chr19:3094362..3094363,+;peakCounts:20143.8	29193	+	3094362	ENST00000078429.9	ENSG00000088256.9	promoter	ENSG00000088256	GNA11
-0.0274681	2.1912	16.795	0.000485981	0.0587108	rDPI_39422	chr4	38664263	38664269	chr4:38664263..38664269,chr4:38663984..38664346,+;peak:chr4:38664268..38664269,+;peakCounts:694.6	1278	+	38664268	ENST00000261438.10	ENSG00000109787.13	alternative	ENSG00000109787	KLF3
0.0311578	2.04252	16.7919	0.000486424	0.0587108	rDPI_37816	chr3	124887422	124887431	chr3:124887422..124887431,chr3:124887132..124887690,-;peak:chr3:124887426..124887427,-;peakCounts:43.5	2361	-	124887426	ENST00000296181.9	ENSG00000082781.12	alternative	ENSG00000082781	ITGB5
0.0501131	6.41073	16.7759	0.00048873	0.0588802	rDPI_43259	chr5	150624655	150624671	chr5:150624655..150624671,chr5:150624508..150624916,+;peak:chr5:150624659..150624660,+;peakCounts:18032	52739	+	150624659	ENST00000518872.1	ENSG00000171992.13	alternative	ENSG00000171992	SYNPO
-0.032477	1.99735	16.7632	0.000490576	0.0589938	rDPI_20978	chr17	7403735	7403755	chr17:7403735..7403755,chr17:7403665..7403787,-;peak:chr17:7403749..7403750,-;peakCounts:329.4	708	-	7403749	ENST00000575427.1	ENSG00000205544.4	alternative	ENSG00000205544	TMEM256
0.0473385	5.43706	16.7558	0.000491649	0.0590142	rDPI_18469	chr15	91853693	91853757	chr15:91853693..91853757,chr15:91853661..91854003,+;peak:chr15:91853710..91853711,+;peakCounts:3844.8	26969	+	91853710	ENST00000318445.11	ENSG00000176463.14	promoter	ENSG00000176463	SLCO3A1
0.0340547	3.00239	16.7372	0.000494377	0.0591249	rDPI_2685	chr1	113929628	113929638	chr1:113929628..113929638,chr1:113929571..113929767,+;peak:chr1:113929630..113929631,+;peakCounts:729.8	3748	+	113929630	ENST00000369558.5	ENSG00000163349.22	alternative	ENSG00000163349	HIPK1
0.0291182	2.0798	16.7371	0.000494383	0.0591249	rDPI_21539	chr17	31094958	31094969	chr17:31094958..31094969,chr17:31094867..31095004,+;peak:chr17:31094963..31094964,+;peakCounts:274.1	2157	+	31094963	ENST00000431387.8	ENSG00000196712.18	alternative	ENSG00000196712	NF1
-0.0303709	2.44349	16.7212	0.000496721	0.059296	rDPI_17425	chr15	50686774	50686779	chr15:50686774..50686779,chr15:50686575..50686863,-;peak:chr15:50686776..50686777,-;peakCounts:980.6	2600	-	50686776	ENST00000560955.5	ENSG00000092439.16	alternative	ENSG00000092439	TRPM7
0.0573769	3.87047	16.7093	0.000498477	0.0593329	rDPI_1793	chr1	54406379	54406390	chr1:54406379..54406390,chr1:54406208..54406465,-;peak:chr1:54406384..54406385,-;peakCounts:8204.4	10246	-	54406384	ENST00000610401.5	ENSG00000157216.16	promoter	ENSG00000157216	SSBP3
0.0271117	1.9976	16.7068	0.000498848	0.0593329	rDPI_16022	chr14	70907422	70907444	chr14:70907422..70907444,chr14:70907338..70907579,+;peak:chr14:70907438..70907439,+;peakCounts:180.2	1989	+	70907438	ENST00000304743.7	ENSG00000100731.16	alternative	ENSG00000100731	PCNX1
0.0441106	1.6931	16.6996	0.00049992	0.0593524	rDPI_529	chr1	15604550	15604552	chr1:15604550..15604552,+	1664	+	15604550	ENST00000454346.1	ENSG00000235084.3	promoter	ENSG00000235084	NA
-0.0343544	4.04271	16.6771	0.000503271	0.0595991	rDPI_14851	chr14	23387852	23387867	chr14:23387852..23387867,chr14:23387527..23388005,-;peak:chr14:23387857..23387858,-;peakCounts:1495.9	4207	-	23387857	ENST00000362287.2	ENSG00000199157.2	alternative	ENSG00000199157	MIR208A
-0.0299671	3.737	16.6693	0.000504438	0.0595991	rDPI_36658	chr3	47164080	47164105	chr3:47164080..47164105,chr3:47163931..47164183,-;peak:chr3:47164091..47164092,-;peakCounts:1695.6	4361	-	47164091	ENST00000409792.4	ENSG00000181555.21	promoter	ENSG00000181555	SETD2
0.0446441	1.95271	16.6673	0.000504737	0.0595991	rDPI_24279	chr18	77087570	77087588	chr18:77087570..77087588,chr18:77087434..77087673,-;peak:chr18:77087575..77087576,-;peakCounts:1710.9	3755	-	77087575	ENST00000580473.5	ENSG00000197971.16	promoter	ENSG00000197971	MBP
0.0526246	8.0758	16.6574	0.000506219	0.0596114	rDPI_43241	chr5	150412751	150412754	chr5:150412751..150412754,chr5:150412633..150412937,-;peak:chr5:150412751..150412752,-;peakCounts:159177.6	186667	-	150412751	ENST00000009530.12	ENSG00000019582.16	promoter	ENSG00000019582	CD74
0.0423276	4.26211	16.6524	0.00050698	0.0596114	rDPI_43802	chr5	180494356	180494427	chr5:180494356..180494427,chr5:180494329..180494581,+;peak:chr5:180494399..180494400,+;peakCounts:2001.6	15148	+	180494399	ENST00000261951.9	ENSG00000113300.13	promoter	ENSG00000113300	CNOT6
-0.0288983	6.86291	16.6447	0.000508142	0.0596114	rDPI_6969	chr10	95561368	95561377	chr10:95561368..95561377,chr10:95561325..95561481,-;peak:chr10:95561371..95561372,-;peakCounts:12985.2	52589	-	95561371	ENST00000474353.6	ENSG00000095637.22	promoter	ENSG00000095637	SORBS1
0.0290776	3.66913	16.6315	0.000510128	0.0596114	rDPI_42174	chr5	80408059	80408074	chr5:80408059..80408074,chr5:80407970..80408121,+;peak:chr5:80408064..80408065,+;peakCounts:3282.3	6205	+	80408064	ENST00000505560.5	ENSG00000039319.17	alternative	ENSG00000039319	ZFYVE16
-0.034624	3.20029	16.6278	0.000510689	0.0596114	rDPI_15860	chr14	61762414	61762421	chr14:61762414..61762421,chr14:61762303..61762462,+;peak:chr14:61762420..61762421,+;peakCounts:4837.5	6275	+	61762420	ENST00000216294.5	ENSG00000023608.5	promoter	ENSG00000023608	SNAPC1
-0.0400408	2.48013	16.6253	0.000511069	0.0596114	rDPI_40946	chr4	168631600	168631623	chr4:168631600..168631623,chr4:168631427..168631813,+;peak:chr4:168631605..168631606,+;peakCounts:775.8	2362	+	168631605	ENST00000504519.5	ENSG00000129116.19	promoter	ENSG00000129116	PALLD
-0.0356979	2.15517	16.6243	0.000511232	0.0596114	rDPI_21755	chr17	39461486	39461489	chr17:39461486..39461489,chr17:39461434..39461555,+;peak:chr17:39461486..39461487,+;peakCounts:1049.2	1576	+	39461486	ENST00000447079.6	ENSG00000167258.15	alternative	ENSG00000167258	CDK12
-0.0447069	4.9388	16.6145	0.000512722	0.0596787	rDPI_38386	chr3	158571217	158571223	chr3:158571217..158571223,chr3:158571118..158571403,+;peak:chr3:158571222..158571223,+;peakCounts:2408.9	11395	+	158571222	ENST00000498592.6	ENSG00000178053.20	alternative	ENSG00000178053	MLF1
0.0316505	2.99749	16.576	0.000518632	0.0602591	rDPI_37817	chr3	124887442	124887458	chr3:124887442..124887458,chr3:124887132..124887690,-;peak:chr3:124887452..124887453,-;peakCounts:463.5	5025	-	124887452	ENST00000296181.9	ENSG00000082781.12	alternative	ENSG00000082781	ITGB5
-0.0312472	2.4845	16.5628	0.000520679	0.0603842	rDPI_10568	chr11	123062467	123062489	chr11:123062467..123062489,chr11:123062357..123062527,-;peak:chr11:123062472..123062473,-;peakCounts:352.8	1326	-	123062472	ENST00000527387.5	ENSG00000109971.14	alternative	ENSG00000109971	HSPA8
0.0264339	1.82592	16.5571	0.000521558	0.0603842	rDPI_52028	chr9	93576506	93576519	chr9:93576506..93576519,chr9:93576335..93576779,+;peak:chr9:93576511..93576512,+;peakCounts:824.4	1519	+	93576511	ENST00000359246.9	ENSG00000197724.11	alternative	ENSG00000197724	PHF2
-0.0462326	4.43401	16.55	0.000522658	0.0604045	rDPI_49177	chr7	151736465	151736473	chr7:151736465..151736473,chr7:151736452..151736550,-;peak:chr7:151736465..151736466,-;peakCounts:4131.9	6229	-	151736465	ENST00000492843.6	ENSG00000106617.15	alternative	ENSG00000106617	PRKAG2
-0.0362278	3.16912	16.5363	0.000524799	0.0605448	rDPI_14838	chr14	23386106	23386113	chr14:23386106..23386113,chr14:23385926..23386141,-;peak:chr14:23386109..23386110,-;peakCounts:580.1	1861	-	23386109	ENST00000651452.1	ENSG00000197616.13	alternative	ENSG00000197616	MYH6
0.0479395	3.39892	16.5047	0.00052978	0.0610083	rDPI_3311	chr1	154558651	154558668	chr1:154558651..154558668,chr1:154558614..154558821,-;peak:chr1:154558662..154558663,-;peakCounts:2217.6	7239	-	154558662	ENST00000292211.5	ENSG00000160714.10	promoter	ENSG00000160714	UBE2Q1
0.0347484	2.02416	16.4989	0.000530686	0.0610083	rDPI_9248	chr11	64246873	64246885	chr11:64246873..64246885,chr11:64246546..64246976,-;peak:chr11:64246878..64246879,-;peakCounts:852.1	3252	-	64246878	ENST00000309318.8	ENSG00000173457.11	alternative	ENSG00000173457	PPP1R14B
-0.0296075	1.65996	16.4881	0.000532397	0.0610334	rDPI_49161	chr7	151519597	151519634	chr7:151519597..151519634,chr7:151519522..151519635,-;peak:chr7:151519612..151519613,-;peakCounts:176.4	867	-	151519612	ENST00000478470.5	ENSG00000106615.10	alternative	ENSG00000106615	RHEB
-0.0344719	6.09927	16.4858	0.000532773	0.0610334	rDPI_42906	chr5	138543156	138543179	chr5:138543156..138543179,chr5:138543062..138543301,-;peak:chr5:138543165..138543166,-;peakCounts:13265.1	28538	-	138543165	ENST00000512198.1	ENSG00000120705.13	promoter	ENSG00000120705	ETF1
-0.0275111	1.2625	16.473	0.000534805	0.0611588	rDPI_52014	chr9	93189542	93189546	chr9:93189542..93189546,+	204	+	93189542	ENST00000432730.5	ENSG00000165238.16	enhancer	ENSG00000165238	WNK2
0.0339738	2.81658	16.4602	0.000536852	0.0612118	rDPI_25806	chr19	29942224	29942231	chr19:29942224..29942231,chr19:29942185..29942362,+;peak:chr19:29942227..29942228,+;peakCounts:1729.9	6304	+	29942227	ENST00000392271.6	ENSG00000105176.18	alternative	ENSG00000105176	URI1
0.0691209	3.28845	16.4584	0.000537143	0.0612118	rDPI_23199	chr17	79024107	79024113	chr17:79024107..79024113,chr17:79024022..79024490,+;peak:chr17:79024107..79024108,+;peakCounts:717.4	3346	+	79024107	ENST00000582295.1	ENSG00000173918.15	alternative	ENSG00000173918	C1QTNF1
0.0815753	2.9739	16.443	0.000539633	0.0613884	rDPI_44690	chr6	32637405	32637408	chr6:32637405..32637408,chr6:32637382..32637454,+;peak:chr6:32637406..32637407,+;peakCounts:3933	4603	+	32637406	ENST00000496318.5	ENSG00000196735.13	promoter	ENSG00000196735	HLA-DQA1
0.0362155	3.04726	16.4309	0.000541583	0.0614313	rDPI_36878	chr3	50155078	50155101	chr3:50155078..50155101,chr3:50155001..50155158,+;peak:chr3:50155095..50155096,+;peakCounts:1003.5	5443	+	50155095	ENST00000413852.5	ENSG00000001617.12	promoter	ENSG00000001617	SEMA3F
-0.0337055	2.22373	16.429	0.000541891	0.0614313	rDPI_14801	chr14	23325956	23325967	chr14:23325956..23325967,+	987	+	23325964	ENST00000555295.1	ENSG00000100836.10	not_classified	ENSG00000100836	PABPN1
-0.0496588	6.25478	16.4154	0.000544107	0.0614509	rDPI_10255	chr11	111912762	111912773	chr11:111912762..111912773,chr11:111912584..111912914,+;peak:chr11:111912767..111912768,+;peakCounts:17044	30219	+	111912767	ENST00000534100.1	ENSG00000254445.1	alternative	ENSG00000254445	HSPB2-C11orf52
-0.0428172	7.45304	16.4146	0.000544228	0.0614509	rDPI_11840	chr12	53097662	53097668	chr12:53097662..53097668,chr12:53097589..53098228,+;peak:chr12:53097667..53097668,+;peakCounts:51393.6	61641	+	53097667	ENST00000548176.1	ENSG00000167779.9	promoter	ENSG00000167779	IGFBP6
0.0306464	1.667	16.3978	0.000546978	0.0614509	rDPI_25478	chr19	15432708	15432719	chr19:15432708..15432719,chr19:15432673..15432762,-;peak:chr19:15432713..15432714,-;peakCounts:423	876	-	15432713	ENST00000674089.4	ENSG00000011451.21	alternative	ENSG00000011451	WIZ
-0.0327802	6.1292	16.3966	0.000547173	0.0614509	rDPI_4692	chr1	212432915	212432929	chr1:212432915..212432929,chr1:212432801..212433120,+;peak:chr1:212432920..212432921,+;peakCounts:10827.9	34490	+	212432920	ENST00000366988.5	ENSG00000117691.10	promoter	ENSG00000117691	NENF
0.0330007	1.75234	16.3963	0.000547217	0.0614509	rDPI_46212	chr6	143060695	143060721	chr6:143060695..143060721,chr6:143060663..143060735,+;peak:chr6:143060700..143060701,+;peakCounts:405.9	1772	+	143060700	ENST00000447498.5	ENSG00000146416.19	enhancer	ENSG00000146416	AIG1
-0.0334653	2.48752	16.3933	0.000547711	0.0614509	rDPI_13252	chr12	114404219	114404236	chr12:114404219..114404236,chr12:114404087..114404255,-;peak:chr12:114404226..114404227,-;peakCounts:452.7	1131	-	114404226	ENST00000552726.1	ENSG00000089225.20	enhancer	ENSG00000089225	TBX5
0.0321501	2.01465	16.3847	0.000549117	0.061503	rDPI_15658	chr14	52695895	52695909	chr14:52695895..52695909,chr14:52695861..52696044,-;peak:chr14:52695898..52695899,-;peakCounts:428.2	1607	-	52695898	ENST00000556039.5	ENSG00000197930.13	alternative	ENSG00000197930	ERO1A
-0.0780873	5.06364	16.3755	0.000550639	0.0615478	rDPI_13264	chr12	114408012	114408014	chr12:114408012..114408014,chr12:114407946..114408116,-;peak:chr12:114408012..114408013,-;peakCounts:5339.7	6069	-	114408012	ENST00000349716.9	ENSG00000089225.20	promoter	ENSG00000089225	TBX5
-0.0279722	2.01313	16.3709	0.000551402	0.0615478	rDPI_1735	chr1	52602371	52602378	chr1:52602371..52602378,chr1:52602361..52602447,+;peak:chr1:52602377..52602378,+;peakCounts:283.2	1186	+	52602377	ENST00000361314.5	ENSG00000116157.6	alternative	ENSG00000116157	GPX7
0.0262233	1.33788	19.168	0.000558384	0.0619063	rDPI_3439	chr1	156053774	156053789	chr1:156053774..156053789,chr1:156053757..156053850,-;peak:chr1:156053783..156053784,-;peakCounts:248.4	593	-	156053783	ENST00000368309.4	ENSG00000160803.8	promoter	ENSG00000160803	UBQLN4
0.0674488	3.60732	16.3232	0.000559334	0.0619063	rDPI_28310	chr2	46542762	46542766	chr2:46542762..46542766,chr2:46542476..46542856,+;peak:chr2:46542765..46542766,+;peakCounts:2901	12215	+	46542765	ENST00000432183.5	ENSG00000119729.12	alternative	ENSG00000119729	RHOQ
-0.0310307	1.04974	16.3228	0.000559409	0.0619063	rDPI_24953	chr19	8404196	8404202	chr19:8404196..8404202,chr19:8404115..8404203,+;peak:chr19:8404201..8404202,+;peakCounts:318.6	359	+	8404201	ENST00000381035.8	ENSG00000099785.11	ambiguous	ENSG00000099785	MARCHF2
-0.0379087	5.27371	16.3142	0.000560859	0.0619063	rDPI_35956	chr3	12158909	12158913	chr3:12158909..12158913,chr3:12158824..12158992,-;peak:chr3:12158909..12158910,-;peakCounts:9693	18889	-	12158909	ENST00000287814.5	ENSG00000157150.5	promoter	ENSG00000157150	TIMP4
-0.0331002	4.74601	16.3122	0.000561199	0.0619063	rDPI_37099	chr3	53882143	53882158	chr3:53882143..53882158,chr3:53882017..53882208,-;peak:chr3:53882152..53882153,-;peakCounts:6410.7	9314	-	53882152	ENST00000335754.8	ENSG00000113812.14	promoter	ENSG00000113812	ACTR8
-0.0569313	2.18577	16.3095	0.000561649	0.0619063	rDPI_49595	chr8	22920191	22920197	chr8:22920191..22920197,chr8:22920188..22920308,-;peak:chr8:22920191..22920192,-;peakCounts:920.7	1142	-	22920191	ENST00000256404.8	ENSG00000134020.8	alternative	ENSG00000134020	PEBP4
0.0713943	2.90127	16.3075	0.000561983	0.0619063	rDPI_29087	chr2	88885542	88885545	chr2:88885542..88885545,+	2974	+	88885542	ENST00000390243.2	ENSG00000211598.2	promoter	ENSG00000211598	IGKV4-1
-0.0309184	1.94504	16.3062	0.000562199	0.0619063	rDPI_29425	chr2	113235783	113235794	chr2:113235783..113235794,chr2:113235682..113235860,+;peak:chr2:113235788..113235789,+;peakCounts:376.2	1045	+	113235788	ENST00000553869.7	ENSG00000189223.15	alternative	ENSG00000189223	PAX8-AS1
-0.0391275	4.12025	16.2828	0.000566165	0.0621078	rDPI_3476	chr1	156591788	156591795	chr1:156591788..156591795,chr1:156591730..156591977,+;peak:chr1:156591791..156591792,+;peakCounts:5230.3	7412	+	156591791	ENST00000368233.3	ENSG00000163382.13	alternative	ENSG00000163382	NAXE
0.0314178	3.04667	16.2824	0.000566238	0.0621078	rDPI_34370	chr21	34615043	34615067	chr21:34615043..34615067,chr21:34614929..34615321,-;peak:chr21:34615048..34615049,-;peakCounts:1015.9	4067	-	34615048	ENST00000463276.1	ENSG00000159200.18	alternative	ENSG00000159200	RCAN1
0.02677	3.78612	16.2786	0.000566881	0.0621078	rDPI_27223	chr19	54159713	54159724	chr19:54159713..54159724,chr19:54159580..54159807,-;peak:chr19:54159718..54159719,-;peakCounts:7299	11412	-	54159718	ENST00000222224.4	ENSG00000105617.4	promoter	ENSG00000105617	LENG1
-0.0260688	4.86083	16.2627	0.000569593	0.0621503	rDPI_42885	chr5	138213303	138213374	chr5:138213303..138213374,chr5:138213303..138213374,-	16801	-	138213323	ENST00000394886.7	ENSG00000094880.11	promoter	ENSG00000094880	CDC23
0.0346865	3.36996	16.2588	0.000570256	0.0621503	rDPI_41376	chr5	14143339	14143346	chr5:14143339..14143346,chr5:14143228..14143374,+;peak:chr5:14143342..14143343,+;peakCounts:5667.3	8142	+	14143342	ENST00000344204.9	ENSG00000038382.20	promoter	ENSG00000038382	TRIO
-0.0412821	4.14865	16.2543	0.000571045	0.0621503	rDPI_1356	chr1	37990012	37990031	chr1:37990012..37990031,chr1:37989968..37990103,-;peak:chr1:37990022..37990023,-;peakCounts:3796.2	6958	-	37990022	ENST00000373019.5	ENSG00000183431.12	promoter	ENSG00000183431	SF3A3
0.0288016	3.11377	16.2469	0.000572315	0.0621503	rDPI_26230	chr19	39336014	39336028	chr19:39336014..39336028,chr19:39335990..39336092,-;peak:chr19:39336023..39336024,-;peakCounts:1054.2	3811	-	39336023	ENST00000601387.5	ENSG00000130755.13	promoter	ENSG00000130755	GMFG
-0.064403	2.41889	16.2457	0.00057251	0.0621503	rDPI_50441	chr8	97066025	97066033	chr8:97066025..97066033,chr8:97065932..97066126,+;peak:chr8:97066027..97066028,+;peakCounts:855.7	1623	+	97066027	ENST00000529551.1	ENSG00000104324.16	alternative	ENSG00000104324	CPQ
0.0296653	1.76202	16.2374	0.000573954	0.0621503	rDPI_43089	chr5	142697681	142697720	chr5:142697681..142697720,chr5:142697634..142697804,-;peak:chr5:142697699..142697700,-;peakCounts:261.9	1629	-	142697699	ENST00000407758.5	ENSG00000113578.18	alternative	ENSG00000113578	FGF1
0.0373209	1.83962	16.2357	0.000574235	0.0621503	rDPI_16325	chr14	90816437	90816446	chr14:90816437..90816446,chr14:90816295..90816530,-;peak:chr14:90816441..90816442,-;peakCounts:720.3	1503	-	90816441	ENST00000328459.11	ENSG00000165914.15	alternative	ENSG00000165914	TTC7B
-0.0318582	3.00901	16.2277	0.000575632	0.0621503	rDPI_3142	chr1	151909503	151909513	chr1:151909503..151909513,chr1:151909383..151909631,-;peak:chr1:151909512..151909513,-;peakCounts:760.9	2977	-	151909512	ENST00000368814.8	ENSG00000159445.13	promoter	ENSG00000159445	THEM4
-0.0491052	2.15208	16.2168	0.000577511	0.0621503	rDPI_14880	chr14	23390073	23390082	chr14:23390073..23390082,chr14:23390009..23390123,-;peak:chr14:23390076..23390077,-;peakCounts:436.5	1148	-	23390076	ENST00000362287.2	ENSG00000199157.2	alternative	ENSG00000199157	MIR208A
0.0397636	3.03041	16.2161	0.000577641	0.0621503	rDPI_17813	chr15	66386912	66386918	chr15:66386912..66386918,chr15:66386804..66387060,+;peak:chr15:66386912..66386913,+;peakCounts:8640.9	10362	+	66386912	ENST00000307102.10	ENSG00000169032.10	promoter	ENSG00000169032	MAP2K1
-0.0445635	1.9869	16.2155	0.00057774	0.0621503	rDPI_19648	chr16	46706116	46706117	chr16:46706116..46706117,chr16:46705998..46706123,-;peak:chr16:46706116..46706117,-;peakCounts:884.7	983	-	46706116	ENST00000565182.5	ENSG00000140795.13	enhancer	ENSG00000140795	MYLK3
-0.0306514	2.53032	16.2045	0.00057966	0.0622543	rDPI_42016	chr5	77180304	77180310	chr5:77180304..77180310,chr5:77180231..77180432,+;peak:chr5:77180304..77180305,+;peakCounts:974.7	1181	+	77180304	ENST00000505926.5	ENSG00000113231.14	enhancer	ENSG00000113231	PDE8B
0.0357913	5.57526	16.171	0.000585528	0.0627813	rDPI_46394	chr6	154576283	154576287	chr6:154576283..154576287,+	44997	+	154576286	ENST00000402039.1	ENSG00000219146.1	promoter	ENSG00000219146	RPS4XP8
0.0398359	1.95563	16.1586	0.000587726	0.0629137	rDPI_29280	chr2	101308648	101308659	chr2:101308648..101308659,chr2:101308597..101308756,-;peak:chr2:101308653..101308654,-;peakCounts:385.7	1179	-	101308653	ENST00000295317.4	ENSG00000163162.9	alternative	ENSG00000163162	RNF149
-0.0408307	3.25552	16.1502	0.000589222	0.0629344	rDPI_24715	chr19	4124145	4124148	chr19:4124145..4124148,chr19:4124027..4124239,-;peak:chr19:4124147..4124148,-;peakCounts:1488.8	3075	-	4124147	ENST00000262948.10	ENSG00000126934.14	alternative	ENSG00000126934	MAP2K2
0.0283083	1.29212	16.1445	0.000590237	0.0629344	rDPI_33917	chr20	62407314	62407317	chr20:62407314..62407317,chr20:62407247..62407321,-;peak:chr20:62407316..62407317,-;peakCounts:467.6	720	-	62407316	ENST00000279101.9	ENSG00000149679.11	alternative	ENSG00000149679	CABLES2
-0.0444149	5.83027	16.1358	0.000591776	0.0629344	rDPI_27198	chr19	53867883	53867889	chr19:53867883..53867889,chr19:53867830..53867942,+;peak:chr19:53867883..53867884,+;peakCounts:15992.1	23053	+	53867883	ENST00000448420.5	ENSG00000179820.16	promoter	ENSG00000179820	MYADM
-0.0390096	2.60398	16.1327	0.00059234	0.0629344	rDPI_15493	chr14	35122559	35122567	chr14:35122559..35122567,chr14:35122531..35122781,+;peak:chr14:35122564..35122565,+;peakCounts:536.5	2291	+	35122564	ENST00000250377.11	ENSG00000100890.16	alternative	ENSG00000100890	PRORP
-0.0301276	3.33268	16.1305	0.000592739	0.0629344	rDPI_13720	chr13	21061518	21061528	chr13:21061518..21061528,chr13:21061457..21061646,-;peak:chr13:21061526..21061527,-;peakCounts:962.4	3822	-	21061526	ENST00000382592.5	ENSG00000150457.9	alternative	ENSG00000150457	LATS2
-0.0456413	3.56401	16.1182	0.000594932	0.0630647	rDPI_12736	chr12	101680373	101680380	chr12:101680373..101680380,chr12:101680124..101680525,+;peak:chr12:101680373..101680374,+;peakCounts:1941.4	3568	+	101680373	ENST00000549608.1	ENSG00000196091.15	alternative	ENSG00000196091	MYBPC1
-0.0279424	2.97642	16.1032	0.000597639	0.063249	rDPI_37793	chr3	123585075	123585084	chr3:123585075..123585084,chr3:123585021..123585107,-;peak:chr3:123585079..123585080,-;peakCounts:1474	2936	-	123585079	ENST00000383657.10	ENSG00000206527.10	alternative	ENSG00000206527	HACD2
0.0266197	1.28631	19.8661	0.000599703	0.0633224	rDPI_32518	chr2	237692221	237692228	chr2:237692221..237692228,chr2:237692091..237692515,+;peak:chr2:237692224..237692225,+;peakCounts:366.4	770	+	237692224	ENST00000244815.9	ENSG00000124831.19	alternative	ENSG00000124831	LRRFIP1
-0.0763496	2.02625	16.0843	0.000601065	0.0633224	rDPI_36597	chr3	45995862	45995875	chr3:45995862..45995875,chr3:45995841..45995976,+;peak:chr3:45995867..45995868,+;peakCounts:206.6	870	+	45995867	ENST00000413087.1	ENSG00000226933.1	promoter	ENSG00000226933	NA
-0.0240291	2.33798	16.0799	0.000601862	0.0633224	rDPI_27446	chr19	57389879	57389886	chr19:57389879..57389886,chr19:57389822..57389927,+;peak:chr19:57389885..57389886,+;peakCounts:794.7	2242	+	57389885	ENST00000598895.5	ENSG00000188785.12	alternative	ENSG00000188785	ZNF548
-0.0293971	5.04952	16.0754	0.000602681	0.0633224	rDPI_13721	chr13	21061532	21061551	chr13:21061532..21061551,chr13:21061457..21061646,-;peak:chr13:21061537..21061538,-;peakCounts:2561.4	12610	-	21061537	ENST00000382592.5	ENSG00000150457.9	promoter	ENSG00000150457	LATS2
-0.0362047	3.25081	16.0674	0.000604143	0.0633224	rDPI_25626	chr19	18433665	18433772	chr19:18433665..18433772,chr19:18433665..18433772,+	2398	+	18433708	ENST00000599699.2	ENSG00000130511.16	enhancer	ENSG00000130511	SSBP4
-0.0469929	2.74395	16.0586	0.000605748	0.0633224	rDPI_8378	chr11	18588791	18588805	chr11:18588791..18588805,chr11:18588747..18588981,+;peak:chr11:18588797..18588798,+;peakCounts:624.5	1847	+	18588797	ENST00000636313.1	ENSG00000247595.4	alternative	ENSG00000247595	SPTY2D1OS
0.0314176	4.2455	16.058	0.000605845	0.0633224	rDPI_27704	chr2	10812741	10812746	chr2:10812741..10812746,chr2:10812683..10812860,-;peak:chr2:10812741..10812742,-;peakCounts:4866.1	10964	-	10812741	ENST00000489662.1	ENSG00000143870.13	alternative	ENSG00000143870	PDIA6
0.0348808	5.45188	16.0567	0.00060609	0.0633224	rDPI_46540	chr6	163414729	163414749	chr6:163414729..163414749,chr6:163414592..163415335,+;peak:chr6:163414743..163414744,+;peakCounts:18842.4	47540	+	163414743	ENST00000361752.8	ENSG00000112531.17	alternative	ENSG00000112531	QKI
0.034735	5.1767	16.0435	0.000608509	0.0633914	rDPI_33854	chr20	59007285	59007312	chr20:59007285..59007312,chr20:59006991..59007365,-;peak:chr20:59007303..59007304,-;peakCounts:5166	23837	-	59007303	ENST00000681877.1	ENSG00000101160.15	promoter	ENSG00000101160	CTSZ
0.0402469	2.35876	16.0425	0.000608692	0.0633914	rDPI_12810	chr12	104138008	104138030	chr12:104138008..104138030,chr12:104137959..104138318,-;peak:chr12:104138013..104138014,-;peakCounts:1303.2	3399	-	104138013	ENST00000551727.5	ENSG00000120837.8	alternative	ENSG00000120837	NFYB
-0.046945	4.83117	16.0358	0.000609934	0.0634195	rDPI_21782	chr17	39666277	39666290	chr17:39666277..39666290,chr17:39665714..39666514,+;peak:chr17:39666284..39666285,+;peakCounts:1669.1	20455	+	39666284	ENST00000309889.3	ENSG00000173991.6	alternative	ENSG00000173991	TCAP
-0.0297134	1.03442	16.022	0.000612491	0.0635399	rDPI_6946	chr10	95384001	95384002	chr10:95384001..95384002,-	332	-	95384001	ENST00000634504.1	ENSG00000095637.22	enhancer	ENSG00000095637	SORBS1
-0.0350145	3.80467	16.019	0.000613038	0.0635399	rDPI_37941	chr3	129161054	129161067	chr3:129161054..129161067,chr3:129160992..129161133,-;peak:chr3:129161063..129161064,-;peakCounts:2228.4	5167	-	129161063	ENST00000393295.8	ENSG00000240682.10	alternative	ENSG00000240682	ISY1
0.0310527	1.78243	16.0062	0.000615431	0.0635902	rDPI_37867	chr3	126983048	126983055	chr3:126983048..126983055,chr3:126983016..126983168,+;peak:chr3:126983051..126983052,+;peakCounts:585.9	2070	+	126983051	ENST00000393409.2	ENSG00000114554.11	alternative	ENSG00000114554	PLXNA1
0.0300343	1.02503	16.006	0.000615471	0.0635902	rDPI_39853	chr4	76023496	76023498	chr4:76023496..76023498,-	32338	-	76023497	ENST00000306602.3	ENSG00000169245.6	promoter	ENSG00000169245	CXCL10
0.0276492	1.20726	22.2258	0.000621187	0.0640743	rDPI_7310	chr10	103855739	103855746	chr10:103855739..103855746,chr10:103855681..103855786,-;peak:chr10:103855742..103855743,-;peakCounts:464.4	889	-	103855742	ENST00000369774.8	ENSG00000107957.16	alternative	ENSG00000107957	SH3PXD2A
-0.0312682	4.55868	15.9705	0.000622119	0.0640743	rDPI_40637	chr4	140427614	140427620	chr4:140427614..140427620,chr4:140427536..140427735,-;peak:chr4:140427615..140427616,-;peakCounts:3027.9	10569	-	140427615	ENST00000509477.1	ENSG00000153132.13	alternative	ENSG00000153132	CLGN
-0.0523406	3.24687	15.9628	0.000623566	0.0640755	rDPI_11034	chr12	6943817	6943818	chr12:6943817..6943818,+	5852	+	6943817	ENST00000544681.1	ENSG00000111678.11	alternative	ENSG00000111678	C12orf57
0.027081	4.14216	15.9579	0.000624495	0.0640755	rDPI_19324	chr16	27268760	27268777	chr16:27268760..27268777,chr16:27268715..27268798,-;peak:chr16:27268771..27268772,-;peakCounts:2602.8	10050	-	27268771	ENST00000361439.9	ENSG00000169189.17	promoter	ENSG00000169189	NSMCE1
-0.0238157	1.56135	15.9507	0.000625871	0.0640755	rDPI_9454	chr11	65855233	65855249	chr11:65855233..65855249,chr11:65855004..65855453,-;peak:chr11:65855238..65855239,-;peakCounts:204.6	455	-	65855238	ENST00000530413.1	ENSG00000172757.13	alternative	ENSG00000172757	CFL1
-0.0388403	3.41869	15.9497	0.000626055	0.0640755	rDPI_30003	chr2	169734006	169734017	chr2:169734006..169734017,chr2:169733796..169734075,+;peak:chr2:169734011..169734012,+;peakCounts:2901.6	3499	+	169734011	ENST00000392647.7	ENSG00000213160.10	promoter	ENSG00000213160	KLHL23
0.10881	2.57772	15.9398	0.000627935	0.0641673	rDPI_20228	chr16	72073248	72073249	chr16:72073248..72073249,+	3476	+	72073248	ENST00000561690.1	ENSG00000261701.8	enhancer	ENSG00000261701	HPR
0.0492294	3.52371	15.917	0.000632301	0.064355	rDPI_41574	chr5	38846032	38846054	chr5:38846032..38846054,chr5:38845961..38846138,+;peak:chr5:38846049..38846050,+;peakCounts:1224.2	5477	+	38846049	ENST00000274276.8	ENSG00000145623.13	promoter	ENSG00000145623	OSMR
-0.0469223	1.31188	15.9114	0.000633383	0.064355	rDPI_6082	chr10	49166893	49166894	chr10:49166893..49166894,-	677	-	49166893	ENST00000488276.1	ENSG00000204161.14	enhancer	ENSG00000204161	TMEM273
-0.0328968	3.1964	15.9104	0.000633559	0.064355	rDPI_54068	chrX	49269833	49269851	chrX:49269833..49269851,chrX:49269750..49269884,+;peak:chrX:49269843..49269844,+;peakCounts:1247.4	4233	+	49269843	ENST00000466508.5	ENSG00000049769.14	promoter	ENSG00000049769	PPP1R3F
-0.0275156	1.62106	15.9096	0.000633714	0.064355	rDPI_11815	chr12	52949086	52949089	chr12:52949086..52949089,chr12:52948977..52949262,+;peak:chr12:52949086..52949087,+;peakCounts:7.79999999999998	476	+	52949086	ENST00000388835.4	ENSG00000111057.11	alternative	ENSG00000111057	KRT18
0.0388712	2.3876	15.8979	0.000635971	0.064484	rDPI_8162	chr11	9265378	9265383	chr11:9265378..9265383,chr11:9265044..9265417,-;peak:chr11:9265380..9265381,-;peakCounts:1725.9	2802	-	9265380	ENST00000328194.8	ENSG00000184014.9	alternative	ENSG00000184014	DENND5A
-0.0372193	1.86897	15.8791	0.000639615	0.0645891	rDPI_16653	chr14	104049371	104049382	chr14:104049371..104049382,chr14:104049324..104049441,+;peak:chr14:104049376..104049377,+;peakCounts:668.7	1186	+	104049376	ENST00000462273.1	ENSG00000156414.19	alternative	ENSG00000156414	TDRD9
0.0321482	3.07594	15.8773	0.000639973	0.0645891	rDPI_38051	chr3	133805841	133805846	chr3:133805841..133805846,chr3:133805774..133805877,+;peak:chr3:133805845..133805846,+;peakCounts:3577.7	4366	+	133805845	ENST00000678299.1	ENSG00000144867.13	alternative	ENSG00000144867	SRPRB
-0.044641	3.71578	15.8747	0.000640471	0.0645891	rDPI_22570	chr17	58692573	58692578	chr17:58692573..58692578,chr17:58692562..58692718,+;peak:chr17:58692573..58692574,+;peakCounts:3377.2	4897	+	58692573	ENST00000461271.5	ENSG00000108384.15	alternative	ENSG00000108384	RAD51C
0.0412192	4.7325	15.8722	0.000640965	0.0645891	rDPI_46139	chr6	138404216	138404236	chr6:138404216..138404236,chr6:138404182..138404591,+;peak:chr6:138404219..138404220,+;peakCounts:4303.3	36069	+	138404219	ENST00000607197.6	ENSG00000051620.11	alternative	ENSG00000051620	HEBP2
-0.0335553	1.73039	15.8606	0.000643233	0.0647177	rDPI_21454	chr17	28812432	28812439	chr17:28812432..28812439,chr17:28812385..28812484,-;peak:chr17:28812435..28812436,-;peakCounts:438	615	-	28812435	ENST00000452648.7	ENSG00000173065.13	alternative	ENSG00000173065	FAM222B
-0.0562914	3.05922	15.8096	0.000653285	0.0656281	rDPI_36468	chr3	42502576	42502660	chr3:42502576..42502660,chr3:42502576..42502660,+	2486	+	42502643	ENST00000436487.5	ENSG00000114812.13	promoter	ENSG00000114812	VIPR1
-0.034811	3.41179	15.7914	0.000656915	0.0658049	rDPI_51198	chr9	2622127	2622141	chr9:2622127..2622141,chr9:2622092..2622295,+;peak:chr9:2622135..2622136,+;peakCounts:1805.4	5756	+	2622135	ENST00000680243.1	ENSG00000147852.17	alternative	ENSG00000147852	VLDLR
0.0353731	3.33655	15.7907	0.000657061	0.0658049	rDPI_43567	chr5	172284102	172284123	chr5:172284102..172284123,chr5:172283968..172284131,-;peak:chr5:172284107..172284108,-;peakCounts:1762.2	4609	-	172284107	ENST00000393792.3	ENSG00000168246.6	promoter	ENSG00000168246	UBTD2
0.0388892	3.94675	15.7791	0.000659391	0.0659371	rDPI_29373	chr2	110115817	110115828	chr2:110115817..110115828,chr2:110115736..110115883,-;peak:chr2:110115819..110115820,-;peakCounts:4168.8	9863	-	110115819	ENST00000272462.3	ENSG00000144063.4	promoter	ENSG00000144063	MALL
-0.0367726	6.68927	15.7658	0.000662073	0.0660126	rDPI_55160	chrY	2841603	2841604	chrY:2841603..2841604,chrY:2841540..2841641,+;peak:chrY:2841603..2841604,+;peakCounts:34627.5	38475	+	2841603	ENST00000250784.13	ENSG00000129824.16	promoter	ENSG00000129824	RPS4Y1
-0.0381256	3.02183	15.7636	0.000662511	0.0660126	rDPI_702	chr1	20028408	20028414	chr1:20028408..20028414,chr1:20028337..20028708,+;peak:chr1:20028408..20028409,+;peakCounts:454.9	2045	+	20028408	ENST00000465698.5	ENSG00000127472.11	alternative	ENSG00000127472	PLA2G5
-0.0332857	5.96054	15.7603	0.000663179	0.0660126	rDPI_3118	chr1	151399555	151399570	chr1:151399555..151399570,chr1:151399526..151399647,+;peak:chr1:151399564..151399565,+;peakCounts:8004.6	27561	+	151399564	ENST00000495288.5	ENSG00000159377.11	promoter	ENSG00000159377	PSMB4
-0.0442175	1.55119	15.7383	0.000667652	0.0662667	rDPI_14882	chr14	23390114	23390120	chr14:23390114..23390120,chr14:23390009..23390123,-;peak:chr14:23390119..23390120,-;peakCounts:196.5	625	-	23390119	ENST00000362287.2	ENSG00000199157.2	alternative	ENSG00000199157	MIR208A
-0.0515496	4.09612	15.7363	0.000668052	0.0662667	rDPI_14915	chr14	23393833	23393844	chr14:23393833..23393844,chr14:23393670..23393912,-;peak:chr14:23393838..23393839,-;peakCounts:2482.2	4644	-	23393838	ENST00000362287.2	ENSG00000199157.2	alternative	ENSG00000199157	MIR208A
-0.0434776	4.71826	15.731	0.000669145	0.0662667	rDPI_14823	chr14	23384594	23384615	chr14:23384594..23384615,chr14:23384216..23384714,-;peak:chr14:23384608..23384609,-;peakCounts:788.4	6326	-	23384608	ENST00000651452.1	ENSG00000197616.13	alternative	ENSG00000197616	MYH6
-0.028502	1.28585	15.7278	0.000669791	0.0662667	rDPI_715	chr1	20486004	20486060	chr1:20486004..20486060,chr1:20486004..20486060,-	208	-	20486007	ENST00000375078.4	ENSG00000162545.6	alternative	ENSG00000162545	CAMK2N1
0.0307094	2.12221	15.7166	0.000672081	0.0662886	rDPI_8972	chr11	60924470	60924483	chr11:60924470..60924483,chr11:60924440..60924549,+;peak:chr11:60924477..60924478,+;peakCounts:720	1968	+	60924477	ENST00000544065.5	ENSG00000006118.15	promoter	ENSG00000006118	TMEM132A
-0.0315647	2.47179	15.7108	0.000673283	0.0662886	rDPI_41263	chr5	693308	693319	chr5:693308..693319,chr5:693291..693414,-;peak:chr5:693313..693314,-;peakCounts:927	2186	-	693313	ENST00000360578.7	ENSG00000171368.12	alternative	ENSG00000171368	TPPP
0.0505218	2.38153	15.7083	0.000673784	0.0662886	rDPI_46113	chr6	136792386	136792410	chr6:136792386..136792410,chr6:136792134..136792594,-;peak:chr6:136792390..136792391,-;peakCounts:2433.6	6957	-	136792390	ENST00000359015.5	ENSG00000197442.10	promoter	ENSG00000197442	MAP3K5
0.0423456	3.19585	15.7006	0.000675388	0.0662886	rDPI_18811	chr16	2214828	2214835	chr16:2214828..2214835,chr16:2214592..2214865,-;peak:chr16:2214831..2214832,-;peakCounts:3234.9	5790	-	2214831	ENST00000333503.8	ENSG00000184207.9	alternative	ENSG00000184207	PGP
-0.0423718	3.75678	15.6973	0.000676055	0.0662886	rDPI_14856	chr14	23388211	23388224	chr14:23388211..23388224,chr14:23388159..23388344,-;peak:chr14:23388216..23388217,-;peakCounts:2502	5719	-	23388216	ENST00000362287.2	ENSG00000199157.2	alternative	ENSG00000199157	MIR208A
0.0547265	1.46287	15.6971	0.000676104	0.0662886	rDPI_41282	chr5	1282574	1282578	chr5:1282574..1282578,-	1638	-	1282574	ENST00000484238.6	ENSG00000164362.21	enhancer	ENSG00000164362	TERT
0.0272255	2.74954	15.6896	0.000677662	0.0663418	rDPI_18013	chr15	73994742	73994754	chr15:73994742..73994754,chr15:73994644..73994814,+;peak:chr15:73994748..73994749,+;peakCounts:889.2	3623	+	73994748	ENST00000567543.5	ENSG00000140464.20	alternative	ENSG00000140464	PML
0.0273012	5.27569	15.6776	0.000680135	0.0664843	rDPI_36713	chr3	48121251	48121258	chr3:48121251..48121258,-	19890	-	48121256	ENST00000444020.1	ENSG00000236768.1	promoter	ENSG00000236768	RPL17P16
-0.0283939	2.61978	15.6646	0.000682865	0.0665813	rDPI_7360	chr10	110227301	110227360	chr10:110227301..110227360,chr10:110227281..110227539,+;peak:chr10:110227350..110227351,+;peakCounts:217.8	2000	+	110227350	ENST00000651109.1	ENSG00000119950.21	promoter	ENSG00000119950	MXI1
0.0299117	2.84462	15.6631	0.000683167	0.0665813	rDPI_42673	chr5	130994241	130994254	chr5:130994241..130994254,+	7442	+	130994241	ENST00000508316.2	ENSG00000250405.2	promoter	ENSG00000250405	LOC402229
0.0401109	3.96078	15.658	0.000684242	0.0665867	rDPI_20149	chr16	69385849	69385913	chr16:69385849..69385913,chr16:69385693..69385927,-;peak:chr16:69385906..69385907,-;peakCounts:798.3	8974	-	69385906	ENST00000567296.6	ENSG00000132604.11	promoter	ENSG00000132604	TERF2
-0.032763	1.50483	15.6524	0.000685404	0.0666004	rDPI_23678	chr18	13542349	13542360	chr18:13542349..13542360,chr18:13542291..13542427,+;peak:chr18:13542354..13542355,+;peakCounts:327.6	408	+	13542354	ENST00000587440.1	ENSG00000168675.19	promoter	ENSG00000168675	LDLRAD4
0.0389864	2.09159	15.6388	0.000688273	0.0667522	rDPI_48613	chr7	128455869	128455884	chr7:128455869..128455884,chr7:128455806..128455948,+;peak:chr7:128455878..128455879,+;peakCounts:2322.9	3846	+	128455878	ENST00000257696.5	ENSG00000135245.10	promoter	ENSG00000135245	HILPDA
-0.0569167	2.71573	15.6353	0.000689011	0.0667522	rDPI_54506	chrX	103586664	103586671	chrX:103586664..103586671,chrX:103586647..103587107,+;peak:chrX:103586664..103586665,+;peakCounts:992.7	1648	+	103586664	ENST00000469586.1	ENSG00000133142.18	enhancer	ENSG00000133142	TCEAL4
-0.0466097	5.74457	15.6216	0.000691904	0.066922	rDPI_31789	chr2	201451455	201451462	chr2:201451455..201451462,chr2:201451347..201451634,-;peak:chr2:201451455..201451456,-;peakCounts:12590.1	20388	-	201451455	ENST00000332624.8	ENSG00000115993.13	promoter	ENSG00000115993	TRAK2
0.0309697	3.99931	15.6173	0.000692813	0.066922	rDPI_25468	chr19	15332490	15332501	chr19:15332490..15332501,chr19:15332448..15332566,-;peak:chr19:15332495..15332496,-;peakCounts:2421.1	8247	-	15332495	ENST00000679869.1	ENSG00000141867.19	alternative	ENSG00000141867	BRD4
-0.041249	2.62577	15.6095	0.000694462	0.0669823	rDPI_33442	chr20	38260728	38260747	chr20:38260728..38260747,chr20:38260689..38260802,-;peak:chr20:38260735..38260736,-;peakCounts:639	1685	-	38260735	ENST00000279024.9	ENSG00000149633.12	promoter	ENSG00000149633	KIAA1755
-0.037582	2.10258	15.5913	0.000698367	0.0671706	rDPI_39186	chr4	5708554	5708564	chr4:5708554..5708564,chr4:5708521..5708611,-;peak:chr4:5708559..5708560,-;peakCounts:323.1	788	-	5708559	ENST00000344408.10	ENSG00000173040.13	alternative	ENSG00000173040	EVC2
-0.0345283	1.13892	15.5885	0.000698966	0.0671706	rDPI_29274	chr2	101257788	101257789	chr2:101257788..101257789,+	507	+	101257788	ENST00000462489.1	ENSG00000158435.8	enhancer	ENSG00000158435	CNOT11
0.0311498	1.65256	15.586	0.000699501	0.0671706	rDPI_43376	chr5	154446006	154446010	chr5:154446006..154446010,chr5:154445948..154446085,+;peak:chr5:154446009..154446010,+;peakCounts:888.7	1833	+	154446009	ENST00000297109.11	ENSG00000164576.12	alternative	ENSG00000164576	SAP30L
-0.0443928	2.45307	15.5762	0.000701596	0.0672728	rDPI_53523	chrM	14615	14626	chrM:14615..14626,chrM:12378..16083,-;peak:chrM:14620..14621,-;peakCounts:2779.1	8442	-	14620	ENST00000361681.2	ENSG00000198695.2	alternative	ENSG00000198695	ND6
0.035881	2.13263	15.5695	0.000703044	0.0673128	rDPI_25087	chr19	10871535	10871542	chr19:10871535..10871542,chr19:10871442..10871749,+;peak:chr19:10871538..10871539,+;peakCounts:1862.1	2651	+	10871538	ENST00000327064.9	ENSG00000142453.12	alternative	ENSG00000142453	CARM1
-0.0251747	5.35431	15.562	0.000704665	0.0673693	rDPI_43560	chr5	172006634	172006678	chr5:172006634..172006678,chr5:172006465..172006697,-;peak:chr5:172006670..172006671,-;peakCounts:1849.3	18112	-	172006670	ENST00000517395.6	ENSG00000072803.18	promoter	ENSG00000072803	FBXW11
0.0243352	3.67236	15.5555	0.00070607	0.0674049	rDPI_28158	chr2	36966509	36966522	chr2:36966509..36966522,chr2:36966471..36966649,-;peak:chr2:36966518..36966519,-;peakCounts:3353.8	11932	-	36966518	ENST00000263918.9	ENSG00000115808.12	alternative	ENSG00000115808	STRN
0.0336735	3.00904	15.539	0.000709652	0.067648	rDPI_44201	chr6	17987822	17987862	chr6:17987822..17987862,chr6:17987742..17988161,-;peak:chr6:17987836..17987837,-;peakCounts:632.1	5608	-	17987836	ENST00000259711.11	ENSG00000137177.20	enhancer	ENSG00000137177	KIF13A
-0.0357107	1.42121	15.5318	0.000711226	0.0676992	rDPI_18925	chr16	3496338	3496383	chr16:3496338..3496383,+	662	+	3496355	ENST00000459875.1	ENSG00000240311.1	promoter	ENSG00000240311	RPL18P12
-0.0371712	2.30034	15.5099	0.000716035	0.0678214	rDPI_43243	chr5	150446909	150446941	chr5:150446909..150446941,chr5:150446846..150446967,-;peak:chr5:150446935..150446936,-;peakCounts:363.6	1146	-	150446935	ENST00000519855.1	ENSG00000164587.13	promoter	ENSG00000164587	RPS14
-0.027672	7.46293	15.5097	0.000716077	0.0678214	rDPI_5177	chr1	236065085	236065098	chr1:236065085..236065098,chr1:236064931..236065247,-;peak:chr1:236065090..236065091,-;peakCounts:28789.2	61655	-	236065090	ENST00000264187.7	ENSG00000116962.15	promoter	ENSG00000116962	NID1
-0.0511806	4.8372	15.5078	0.000716497	0.0678214	rDPI_29343	chr2	106698743	106698744	chr2:106698743..106698744,-	6432	-	106698743	ENST00000443590.1	ENSG00000214199.3	promoter	ENSG00000214199	NA
-0.028544	2.07022	15.506	0.000716893	0.0678214	rDPI_43000	chr5	140564452	140564464	chr5:140564452..140564464,chr5:140564425..140564569,+;peak:chr5:140564458..140564459,+;peakCounts:546.3	1153	+	140564458	ENST00000623481.3	ENSG00000176087.16	alternative	ENSG00000176087	SLC35A4
-0.0255974	4.95993	15.4982	0.000718596	0.0678214	rDPI_24612	chr19	3366604	3366612	chr19:3366604..3366612,chr19:3366544..3366648,+;peak:chr19:3366606..3366607,+;peakCounts:4193.1	22625	+	3366606	ENST00000443272.3	ENSG00000141905.19	alternative	ENSG00000141905	NFIC
0.0357819	2.15247	15.4976	0.000718742	0.0678214	rDPI_46608	chr6	169724025	169724031	chr6:169724025..169724031,chr6:169723931..169724095,-;peak:chr6:169724026..169724027,-;peakCounts:471.4	2215	-	169724026	ENST00000480008.1	ENSG00000130024.15	alternative	ENSG00000130024	PHF10
-0.0303444	1.06879	15.4895	0.000720538	0.0678928	rDPI_53909	chrX	46440445	46440451	chrX:46440445..46440451,chrX:46440387..46440456,-;peak:chrX:46440450..46440451,-;peakCounts:386.1	461	-	46440450	ENST00000425487.2	ENSG00000235587.2	alternative	ENSG00000235587	NA
-0.0536023	1.84599	15.4811	0.000722388	0.067969	rDPI_2938	chr1	148679776	148679782	chr1:148679776..148679782,chr1:148679712..148679797,-;peak:chr1:148679779..148679780,-;peakCounts:648.5	989	-	148679779	ENST00000593495.3	ENSG00000286019.1	alternative	ENSG00000286019	NOTCH2NLB
-0.0265236	2.14327	15.4718	0.000724469	0.0680667	rDPI_44871	chr6	35259526	35259546	chr6:35259526..35259546,chr6:35259481..35259612,+;peak:chr6:35259533..35259534,+;peakCounts:328.2	1020	+	35259533	ENST00000484932.5	ENSG00000065029.15	alternative	ENSG00000065029	ZNF76
0.0420939	3.65058	15.4535	0.000728559	0.0683527	rDPI_46538	chr6	163414666	163414677	chr6:163414666..163414677,chr6:163414592..163415335,+;peak:chr6:163414671..163414672,+;peakCounts:3395.4	17563	+	163414671	ENST00000453779.6	ENSG00000112531.17	alternative	ENSG00000112531	QKI
0.0269727	2.60596	15.4444	0.000730593	0.0684451	rDPI_51679	chr9	38069251	38069257	chr9:38069251..38069257,chr9:38069111..38069286,-;peak:chr9:38069256..38069257,-;peakCounts:563.5	2899	-	38069256	ENST00000377707.4	ENSG00000107338.10	alternative	ENSG00000107338	SHB
-0.0650383	3.20426	15.4384	0.000731949	0.0684475	rDPI_29036	chr2	86563440	86563446	chr2:86563440..86563446,chr2:86563310..86563523,-;peak:chr2:86563443..86563444,-;peakCounts:983	3109	-	86563443	ENST00000263856.9	ENSG00000115561.16	alternative	ENSG00000115561	CHMP3
-0.0326389	1.37227	15.435	0.000732715	0.0684475	rDPI_3977	chr1	178869243	178869251	chr1:178869243..178869251,chr1:178869203..178869349,-;peak:chr1:178869248..178869249,-;peakCounts:202.6	468	-	178869248	ENST00000444255.1	ENSG00000116194.13	alternative	ENSG00000116194	ANGPTL1
-0.0525194	3.28436	15.4289	0.000734086	0.0684776	rDPI_15018	chr14	23405665	23405676	chr14:23405665..23405676,chr14:23405604..23405786,-;peak:chr14:23405668..23405669,-;peakCounts:666.1	2121	-	23405668	ENST00000557461.2	ENSG00000197616.13	alternative	ENSG00000197616	MYH6
-0.0408464	2.40237	15.4217	0.000735736	0.068502	rDPI_8635	chr11	45286269	45286287	chr11:45286269..45286287,chr11:45286207..45286364,-;peak:chr11:45286274..45286275,-;peakCounts:127.7	611	-	45286274	ENST00000020926.8	ENSG00000019505.8	promoter	ENSG00000019505	SYT13
-0.0258908	3.70369	15.4185	0.000736445	0.068502	rDPI_32701	chr20	462545	462554	chr20:462545..462554,chr20:462458..462562,-;peak:chr20:462553..462554,-;peakCounts:1475.5	4860	-	462553	ENST00000681539.1	ENSG00000125875.15	alternative	ENSG00000125875	TBC1D20
-0.0358135	3.18985	15.4128	0.000737754	0.0685262	rDPI_55148	chrX	155147775	155147781	chrX:155147775..155147781,chrX:155147713..155147825,-;peak:chrX:155147775..155147776,-;peakCounts:964.8	1178	-	155147775	ENST00000362018.2	ENSG00000214827.11	promoter	ENSG00000214827	MTCP1
0.0279755	1.67787	15.3931	0.00074225	0.0688458	rDPI_20170	chr16	70251900	70251905	chr16:70251900..70251905,chr16:70251859..70251994,-;peak:chr16:70251900..70251901,-;peakCounts:680.4	1363	-	70251900	ENST00000435634.3	ENSG00000223496.3	alternative	ENSG00000223496	EXOSC6
0.0351007	2.90426	15.3828	0.000744602	0.0688873	rDPI_10703	chr11	130314886	130314912	chr11:130314886..130314912,chr11:130314858..130314940,-;peak:chr11:130314890..130314891,-;peakCounts:675	3979	-	130314890	ENST00000527478.6	ENSG00000196323.14	promoter	ENSG00000196323	ZBTB44
-0.0420169	2.07761	15.3808	0.00074505	0.0688873	rDPI_15015	chr14	23405326	23405332	chr14:23405326..23405332,chr14:23405226..23405397,-;peak:chr14:23405328..23405329,-;peakCounts:108.9	755	-	23405328	ENST00000557461.2	ENSG00000197616.13	alternative	ENSG00000197616	MYH6
-0.0297234	3.16025	15.3773	0.000745863	0.0688873	rDPI_45534	chr6	85642930	85642941	chr6:85642930..85642941,chr6:85642854..85643442,-;peak:chr6:85642935..85642936,-;peakCounts:485.7	2880	-	85642935	ENST00000678618.1	ENSG00000135316.19	alternative	ENSG00000135316	SYNCRIP
0.0422458	4.64343	15.3626	0.000749257	0.069103	rDPI_25899	chr19	35030464	35030483	chr19:35030464..35030483,chr19:35030407..35030608,+;peak:chr19:35030470..35030471,+;peakCounts:6838.2	13227	+	35030470	ENST00000262631.11	ENSG00000105711.13	alternative	ENSG00000105711	SCN1B
-0.0394517	4.13337	15.3384	0.000754876	0.0695231	rDPI_23910	chr18	36828775	36828793	chr18:36828775..36828793,chr18:36828707..36828859,-;peak:chr18:36828780..36828781,-;peakCounts:1078.8	4523	-	36828780	ENST00000589049.5	ENSG00000134779.15	alternative	ENSG00000134779	TPGS2
0.0467268	3.59113	15.3266	0.000757627	0.0696782	rDPI_52341	chr9	111896744	111896939	chr9:111896744..111896939,chr9:111896744..111896939,+	13719	+	111896814	ENST00000374279.4	ENSG00000148154.10	promoter	ENSG00000148154	UGCG
-0.031155	1.32708	15.3064	0.000762385	0.0698053	rDPI_12306	chr12	62965594	62965605	chr12:62965594..62965605,chr12:62965553..62965677,+;peak:chr12:62965599..62965600,+;peakCounts:543.6	892	+	62965599	ENST00000484568.1	ENSG00000139239.7	enhancer	ENSG00000139239	RPL14P1
-0.0211235	4.41522	15.3054	0.000762609	0.0698053	rDPI_2173	chr1	84690441	84690491	chr1:84690441..84690491,chr1:84690379..84690597,-;peak:chr1:84690461..84690462,-;peakCounts:1367.1	8169	-	84690461	ENST00000342203.8	ENSG00000117155.17	promoter	ENSG00000117155	SSX2IP
-0.0303796	3.21853	15.3045	0.00076283	0.0698053	rDPI_27031	chr19	49818297	49818302	chr19:49818297..49818302,chr19:49818247..49818413,+;peak:chr19:49818299..49818300,+;peakCounts:3730.2	5000	+	49818299	ENST00000593767.3	ENSG00000104973.19	alternative	ENSG00000104973	MED25
0.026468	2.64611	15.3008	0.000763709	0.0698053	rDPI_51872	chr9	83817763	83817783	chr9:83817763..83817783,chr9:83817721..83817850,-;peak:chr9:83817769..83817770,-;peakCounts:1281.6	3652	-	83817769	ENST00000376371.7	ENSG00000165113.13	promoter	ENSG00000165113	GKAP1
0.0571107	6.0338	15.2941	0.00076529	0.0698053	rDPI_14798	chr14	23321457	23321463	chr14:23321457..23321463,chr14:23321428..23321658,+;peak:chr14:23321457..23321458,+;peakCounts:21395.7	48060	+	23321457	ENST00000397276.6	ENSG00000100836.10	promoter	ENSG00000100836	PABPN1
-0.0285982	6.67922	15.2935	0.000765423	0.0698053	rDPI_47642	chr7	74174353	74174362	chr7:74174353..74174362,chr7:74174150..74174384,+;peak:chr7:74174356..74174357,+;peakCounts:33545.7	88403	+	74174356	ENST00000495187.2	ENSG00000106682.16	promoter	ENSG00000106682	EIF4H
-0.0361041	3.64176	15.2712	0.000770731	0.0701913	rDPI_36560	chr3	44976169	44976180	chr3:44976169..44976180,chr3:44976053..44976194,-;peak:chr3:44976174..44976175,-;peakCounts:1529.7	4972	-	44976174	ENST00000424952.7	ENSG00000163812.15	alternative	ENSG00000163812	ZDHHC3
-0.0352215	1.74412	15.2413	0.000777889	0.070704	rDPI_48809	chr7	134928878	134928888	chr7:134928878..134928888,chr7:134928752..134928894,+;peak:chr7:134928885..134928886,+;peakCounts:454.5	780	+	134928885	ENST00000496024.1	ENSG00000122786.20	enhancer	ENSG00000122786	CALD1
0.0293924	2.3766	15.2387	0.000778526	0.070704	rDPI_18610	chr16	352673	352693	chr16:352673..352693,chr16:352580..352743,-;peak:chr16:352678..352679,-;peakCounts:1169.1	2727	-	352678	ENST00000481769.1	ENSG00000103126.15	promoter	ENSG00000103126	AXIN1
-0.0380686	1.53235	15.2304	0.000780522	0.0707869	rDPI_49498	chr8	19707108	19707130	chr8:19707108..19707130,chr8:19707071..19707218,-;peak:chr8:19707124..19707125,-;peakCounts:259.2	1065	-	19707124	ENST00000523227.5	ENSG00000147408.14	enhancer	ENSG00000147408	CSGALNACT1
-0.0476174	4.89312	15.2253	0.000781766	0.0708013	rDPI_32029	chr2	216499269	216499353	chr2:216499269..216499353,chr2:216499269..216499353,+	12285	+	216499325	ENST00000441179.2	ENSG00000197756.10	alternative	ENSG00000197756	RPL37A
0.0343715	2.65965	15.2019	0.000787445	0.0711837	rDPI_19807	chr16	56425507	56425516	chr16:56425507..56425516,chr16:56425406..56425614,-;peak:chr16:56425511..56425512,-;peakCounts:619.6	2583	-	56425511	ENST00000290649.10	ENSG00000159461.15	alternative	ENSG00000159461	AMFR
-0.0280216	1.85946	15.199	0.000788168	0.0711837	rDPI_40718	chr4	145180529	145180536	chr4:145180529..145180536,chr4:145180288..145180639,-;peak:chr4:145180532..145180533,-;peakCounts:334	705	-	145180532	ENST00000447906.8	ENSG00000164164.17	alternative	ENSG00000164164	OTUD4
-0.0318871	1.8735	15.1798	0.000792882	0.0715105	rDPI_27798	chr2	20449164	20449170	chr2:20449164..20449170,chr2:20448405..20449194,+;peak:chr2:20449169..20449170,+;peakCounts:569.7	647	+	20449169	ENST00000448241.1	ENSG00000228950.1	promoter	ENSG00000228950	NA
0.0288344	1.53111	15.1604	0.000797662	0.0718313	rDPI_512	chr1	14924138	14924167	chr1:14924138..14924167,chr1:14924085..14924205,+;peak:chr1:14924154..14924155,+;peakCounts:183.6	1095	+	14924154	ENST00000361144.9	ENSG00000189337.17	promoter	ENSG00000189337	KAZN
0.0571848	3.03305	15.154	0.000799265	0.0718313	rDPI_16432	chr14	94390627	94390641	chr14:94390627..94390641,chr14:94390507..94390720,-;peak:chr14:94390635..94390636,-;peakCounts:2279.7	3866	-	94390635	ENST00000440909.5	ENSG00000197249.14	promoter	ENSG00000197249	SERPINA1
0.0285528	4.039	15.152	0.000799739	0.0718313	rDPI_53727	chrX	20266876	20266922	chrX:20266876..20266922,chrX:20266840..20267113,-;peak:chrX:20266882..20266883,-;peakCounts:1511.6	12322	-	20266882	ENST00000379565.9	ENSG00000177189.14	promoter	ENSG00000177189	RPS6KA3
-0.0372229	1.8857	15.1427	0.000802064	0.0719412	rDPI_42399	chr5	102809297	102809312	chr5:102809297..102809312,chr5:102809242..102809324,+;peak:chr5:102809302..102809303,+;peakCounts:234	499	+	102809302	ENST00000509523.1	ENSG00000145730.20	enhancer	ENSG00000145730	PAM
0.0307997	2.22495	15.1317	0.000804819	0.0720839	rDPI_51778	chr9	70413683	70413702	chr9:70413683..70413702,chr9:70413341..70413737,-;peak:chr9:70413688..70413689,-;peakCounts:675.6	1957	-	70413688	ENST00000377126.3	ENSG00000119138.4	alternative	ENSG00000119138	KLF9
-0.0386347	1.54484	15.1275	0.000805864	0.0720839	rDPI_54509	chrX	103586909	103586919	chrX:103586909..103586919,chrX:103586647..103587107,+;peak:chrX:103586914..103586915,+;peakCounts:22.7	665	+	103586914	ENST00000469586.1	ENSG00000133142.18	promoter	ENSG00000133142	TCEAL4
0.0414171	2.34057	15.1086	0.000810614	0.0724096	rDPI_2687	chr1	113929674	113929679	chr1:113929674..113929679,chr1:113929571..113929767,+;peak:chr1:113929678..113929679,+;peakCounts:1143.8	1808	+	113929678	ENST00000369558.5	ENSG00000163349.22	alternative	ENSG00000163349	HIPK1
0.0385761	1.91406	15.0853	0.000816499	0.0726029	rDPI_7896	chr11	1572264	1572277	chr11:1572264..1572277,chr11:1572161..1572302,-;peak:chr11:1572271..1572272,-;peakCounts:1584	2650	-	1572271	ENST00000397374.8	ENSG00000184545.11	promoter	ENSG00000184545	DUSP8
-0.0408379	2.19705	15.0799	0.000817873	0.0726029	rDPI_51345	chr9	19378811	19378823	chr9:19378811..19378823,chr9:19378728..19378924,-;peak:chr9:19378816..19378817,-;peakCounts:1764.1	4033	-	19378816	ENST00000315377.4	ENSG00000137154.13	enhancer	ENSG00000137154	RPS6
-0.0423458	1.92961	15.0716	0.00082001	0.0726029	rDPI_6788	chr10	90912471	90912478	chr10:90912471..90912478,chr10:90912333..90912982,-;peak:chr10:90912474..90912475,-;peakCounts:16.6999999999999	1132	-	90912474	ENST00000371697.4	ENSG00000148677.7	alternative	ENSG00000148677	ANKRD1
0.0430417	4.90371	15.0662	0.000821372	0.0726029	rDPI_48458	chr7	116499618	116499628	chr7:116499618..116499628,chr7:116499382..116499951,+;peak:chr7:116499622..116499623,+;peakCounts:4456.9	12786	+	116499622	ENST00000222693.5	ENSG00000105971.15	alternative	ENSG00000105971	CAV2
-0.0318043	2.62282	15.066	0.000821424	0.0726029	rDPI_28527	chr2	62705728	62705743	chr2:62705728..62705743,chr2:62705641..62705899,+;peak:chr2:62705739..62705740,+;peakCounts:1310.4	3392	+	62705739	ENST00000431489.6	ENSG00000115504.15	alternative	ENSG00000115504	EHBP1
-0.0280117	5.2178	15.0656	0.000821528	0.0726029	rDPI_38944	chr3	196739892	196739912	chr3:196739892..196739912,chr3:196739760..196740159,+;peak:chr3:196739901..196739902,+;peakCounts:7297.2	16429	+	196739901	ENST00000327134.7	ENSG00000180370.10	alternative	ENSG00000180370	PAK2
-0.0329007	3.88494	15.0595	0.000823098	0.0726029	rDPI_52649	chr9	125707189	125707193	chr9:125707189..125707193,chr9:125706983..125707298,-;peak:chr9:125707191..125707192,-;peakCounts:1583.2	5469	-	125707191	ENST00000373496.3	ENSG00000119487.17	alternative	ENSG00000119487	MAPKAP1
0.0399086	4.67985	15.0488	0.000825839	0.0726029	rDPI_29282	chr2	101697704	101697719	chr2:101697704..101697719,chr2:101697569..101697914,+;peak:chr2:101697718..101697719,+;peakCounts:12673.8	40570	+	101697718	ENST00000350878.8	ENSG00000071054.16	promoter	ENSG00000071054	MAP4K4
-0.0213422	5.28292	15.0474	0.0008262	0.0726029	rDPI_16676	chr14	104753169	104753187	chr14:104753169..104753187,chr14:104753099..104753297,+;peak:chr14:104753181..104753182,+;peakCounts:10180.8	23348	+	104753181	ENST00000553819.5	ENSG00000184990.13	promoter	ENSG00000184990	SIVA1
-0.0416454	8.07787	15.044	0.000827082	0.0726029	rDPI_21725	chr17	38853735	38853739	chr17:38853735..38853739,chr17:38853696..38853829,-;peak:chr17:38853736..38853737,-;peakCounts:42858	94697	-	38853736	ENST00000394333.5	ENSG00000125691.14	promoter	ENSG00000125691	RPL23
0.0324263	6.19877	15.0426	0.000827447	0.0726029	rDPI_1244	chr1	33349889	33349909	chr1:33349889..33349909,chr1:33349606..33349958,-;peak:chr1:33349899..33349900,-;peakCounts:11748.6	42634	-	33349899	ENST00000373418.7	ENSG00000134686.18	promoter	ENSG00000134686	PHC2
-0.0270975	2.58482	15.0385	0.000828503	0.0726029	rDPI_25706	chr19	19527696	19527704	chr19:19527696..19527704,chr19:19527695..19527766,+;peak:chr19:19527699..19527700,+;peakCounts:899.9	1955	+	19527699	ENST00000436027.9	ENSG00000250067.12	alternative	ENSG00000250067	YJEFN3
0.0379138	2.91089	15.0365	0.000829013	0.0726029	rDPI_51978	chr9	92482468	92482482	chr9:92482468..92482482,chr9:92482332..92482610,-;peak:chr9:92482472..92482473,-;peakCounts:1869	7002	-	92482472	ENST00000651738.1	ENSG00000106819.13	alternative	ENSG00000106819	ASPN
-0.0310137	4.22228	15.0234	0.000832406	0.0726029	rDPI_25078	chr19	10654341	10654350	chr19:10654341..10654350,chr19:10654253..10654477,+;peak:chr19:10654346..10654347,+;peakCounts:2716.5	6863	+	10654346	ENST00000589998.5	ENSG00000129351.17	alternative	ENSG00000129351	ILF3
0.0220979	3.87962	15.0209	0.000833048	0.0726029	rDPI_12840	chr12	104986333	104986339	chr12:104986333..104986339,chr12:104986292..104986361,+;peak:chr12:104986338..104986339,+;peakCounts:8747.1	11602	+	104986338	ENST00000637147.1	ENSG00000151131.11	promoter	ENSG00000151131	C12orf45
-0.0393733	3.34829	15.0177	0.000833883	0.0726029	rDPI_5137	chr1	234357163	234357164	chr1:234357163..234357164,-	19877	-	234357163	ENST00000422958.1	ENSG00000235605.1	promoter	ENSG00000235605	RPS15P2
-0.0371055	2.39752	15.0105	0.000835761	0.0726029	rDPI_45226	chr6	46130157	46130168	chr6:46130157..46130168,chr6:46130043..46130187,+;peak:chr6:46130167..46130168,+;peakCounts:549.3	1883	+	46130167	ENST00000321037.5	ENSG00000001561.7	alternative	ENSG00000001561	ENPP4
0.029	2.07305	15.0063	0.000836874	0.0726029	rDPI_18001	chr15	73753333	73753340	chr15:73753333..73753340,chr15:73753019..73753384,-;peak:chr15:73753336..73753337,-;peakCounts:233.2	1206	-	73753336	ENST00000569673.3	ENSG00000205363.7	alternative	ENSG00000205363	INSYN1
0.0346512	4.39647	15.0024	0.000837884	0.0726029	rDPI_16681	chr14	104795735	104795757	chr14:104795735..104795757,chr14:104795628..104795812,-;peak:chr14:104795748..104795749,-;peakCounts:2954.8	14937	-	104795748	ENST00000407796.7	ENSG00000142208.17	promoter	ENSG00000142208	AKT1
-0.0220935	6.35322	14.9996	0.000838623	0.0726029	rDPI_18420	chr15	90265672	90265675	chr15:90265672..90265675,chr15:90265634..90265935,+;peak:chr15:90265672..90265673,+;peakCounts:33709.4	42396	+	90265672	ENST00000379095.5	ENSG00000182768.9	alternative	ENSG00000182768	NGRN
0.0262034	1.67332	14.9992	0.000838722	0.0726029	rDPI_42504	chr5	111757714	111757720	chr5:111757714..111757720,chr5:111757609..111757797,-;peak:chr5:111757716..111757717,-;peakCounts:411.1	1002	-	111757716	ENST00000379671.7	ENSG00000134986.14	alternative	ENSG00000134986	NREP
0.0318456	3.29989	14.9921	0.000840588	0.0726029	rDPI_36103	chr3	16264940	16264947	chr3:16264940..16264947,chr3:16264871..16265020,-;peak:chr3:16264943..16264944,-;peakCounts:2751.3	4337	-	16264943	ENST00000488423.2	ENSG00000154813.10	alternative	ENSG00000154813	DPH3
0.0447177	1.41842	14.9871	0.000841896	0.0726029	rDPI_48336	chr7	106285701	106285720	chr7:106285701..106285720,chr7:106285672..106285832,-;peak:chr7:106285705..106285706,-;peakCounts:117.1	347	-	106285705	ENST00000681255.1	ENSG00000105835.13	alternative	ENSG00000105835	NAMPT
-0.0355822	4.06293	14.978	0.000844293	0.0726029	rDPI_40327	chr4	109433835	109433844	chr4:109433835..109433844,chr4:109433762..109433926,+;peak:chr4:109433838..109433839,+;peakCounts:3252.6	5954	+	109433838	ENST00000265175.5	ENSG00000138802.11	alternative	ENSG00000138802	SEC24B
-0.0311705	3.80049	14.9757	0.000844891	0.0726029	rDPI_49958	chr8	42896996	42897006	chr8:42896996..42897006,chr8:42896620..42897129,+;peak:chr8:42897000..42897001,+;peakCounts:2651.7	5521	+	42897000	ENST00000307602.9	ENSG00000168172.9	alternative	ENSG00000168172	HOOK3
-0.028237	2.92071	14.9735	0.00084547	0.0726029	rDPI_46968	chr7	21428095	21428105	chr7:21428095..21428105,chr7:21428030..21428137,+;peak:chr7:21428100..21428101,+;peakCounts:1418.4	2331	+	21428100	ENST00000222584.8	ENSG00000105866.15	promoter	ENSG00000105866	SP4
0.0427815	4.00003	14.9732	0.000845562	0.0726029	rDPI_537	chr1	15684312	15684323	chr1:15684312..15684323,chr1:15684283..15684407,+;peak:chr1:15684320..15684321,+;peakCounts:6597.9	12134	+	15684320	ENST00000375799.8	ENSG00000116786.13	promoter	ENSG00000116786	PLEKHM2
-0.0439894	4.71575	14.9709	0.000846155	0.0726029	rDPI_44305	chr6	26216921	26216922	chr6:26216921..26216922,chr6:26216853..26216939,+;peak:chr6:26216921..26216922,+;peakCounts:8513.1	9459	+	26216921	ENST00000303910.4	ENSG00000277075.2	promoter	ENSG00000277075	H2AC8
-0.042114	3.54015	14.9661	0.000847433	0.0726029	rDPI_48325	chr7	106112260	106112271	chr7:106112260..106112271,chr7:106112162..106112353,-;peak:chr7:106112265..106112266,-;peakCounts:1968.8	4512	-	106112265	ENST00000470347.1	ENSG00000008282.9	alternative	ENSG00000008282	SYPL1
-0.0327877	6.71194	14.9588	0.000849379	0.0726029	rDPI_21415	chr17	28357517	28357533	chr17:28357517..28357533,chr17:28357302..28357614,-;peak:chr17:28357527..28357528,-;peakCounts:16238.7	50239	-	28357527	ENST00000540200.6	ENSG00000004142.12	promoter	ENSG00000004142	POLDIP2
-0.0334388	5.13536	14.9563	0.000850021	0.0726029	rDPI_32296	chr2	219627658	219627669	chr2:219627658..219627669,chr2:219627404..219628038,+;peak:chr2:219627663..219627664,+;peakCounts:13380.1	17944	+	219627663	ENST00000317151.7	ENSG00000114923.17	alternative	ENSG00000114923	SLC4A3
0.0510926	3.35081	14.9487	0.000852065	0.0726029	rDPI_34527	chr21	43865138	43865163	chr21:43865138..43865163,chr21:43865061..43865319,+;peak:chr21:43865143..43865144,+;peakCounts:1431	8442	+	43865143	ENST00000291572.13	ENSG00000160216.21	promoter	ENSG00000160216	AGPAT3
0.033509	3.56329	14.9397	0.000854449	0.0726029	rDPI_32146	chr2	218399865	218399871	chr2:218399865..218399871,chr2:218399820..218399903,+;peak:chr2:218399870..218399871,+;peakCounts:4877.1	9029	+	218399870	ENST00000273062.7	ENSG00000144579.8	promoter	ENSG00000144579	CTDSP1
-0.0350298	1.44449	14.9383	0.000854829	0.0726029	rDPI_1192	chr1	32334482	32334486	chr1:32334482..32334486,-	269	-	32334485	ENST00000329421.8	ENSG00000175130.7	enhancer	ENSG00000175130	MARCKSL1
-0.0302232	1.75833	14.9375	0.000855046	0.0726029	rDPI_23913	chr18	36828981	36828982	chr18:36828981..36828982,chr18:36828891..36829057,-;peak:chr18:36828981..36828982,-;peakCounts:185	491	-	36828981	ENST00000588909.1	ENSG00000134779.15	alternative	ENSG00000134779	TPGS2
0.024629	1.44323	16.2407	0.000855487	0.0726029	rDPI_8818	chr11	47408519	47408528	chr11:47408519..47408528,chr11:47408451..47408654,+;peak:chr11:47408523..47408524,+;peakCounts:184	718	+	47408523	ENST00000531974.5	ENSG00000165915.14	alternative	ENSG00000165915	SLC39A13
-0.0939673	2.01851	14.9336	0.000856076	0.0726029	rDPI_38994	chr3	197758876	197758882	chr3:197758876..197758882,chr3:197758780..197758896,+;peak:chr3:197758881..197758882,+;peakCounts:315	418	+	197758881	ENST00000424384.2	ENSG00000122068.13	not_classified	ENSG00000122068	FYTTD1
-0.0243384	1.54213	14.9308	0.000856841	0.0726029	rDPI_11138	chr12	10213637	10213653	chr12:10213637..10213653,chr12:10213602..10213754,+;peak:chr12:10213637..10213638,+;peakCounts:325.8	600	+	10213637	ENST00000545290.1	ENSG00000139112.11	promoter	ENSG00000139112	GABARAPL1
-0.0694588	1.80287	14.9295	0.000857197	0.0726029	rDPI_14988	chr14	23403063	23403104	chr14:23403063..23403104,-	288	-	23403063	ENST00000557461.2	ENSG00000197616.13	alternative	ENSG00000197616	MYH6
0.037072	5.92158	14.9292	0.000857252	0.0726029	rDPI_46727	chr7	2354862	2354878	chr7:2354862..2354878,chr7:2354793..2354960,+;peak:chr7:2354868..2354869,+;peakCounts:11097.9	48846	+	2354868	ENST00000413917.5	ENSG00000106263.18	promoter	ENSG00000106263	EIF3B
-0.0265047	2.87366	14.9239	0.000858693	0.0726307	rDPI_38453	chr3	161105406	161105414	chr3:161105406..161105414,chr3:161104919..161105499,-;peak:chr3:161105413..161105414,-;peakCounts:359.9	3713	-	161105413	ENST00000652593.1	ENSG00000169255.15	alternative	ENSG00000169255	B3GALNT1
0.0324474	3.27746	14.9166	0.000860642	0.0726524	rDPI_9513	chr11	66070321	66070342	chr11:66070321..66070342,chr11:66070252..66070528,+;peak:chr11:66070326..66070327,+;peakCounts:1781.4	6602	+	66070326	ENST00000527224.1	ENSG00000175115.13	alternative	ENSG00000175115	PACS1
0.0274717	3.20833	14.9147	0.000861174	0.0726524	rDPI_53209	chr9	137046067	137046084	chr9:137046067..137046084,chr9:137045996..137046234,-;peak:chr9:137046071..137046072,-;peakCounts:1776.4	5720	-	137046071	ENST00000488145.1	ENSG00000107281.10	alternative	ENSG00000107281	NPDC1
0.0396521	2.65357	14.8934	0.000866932	0.0729727	rDPI_53081	chr9	135479779	135479805	chr9:135479779..135479805,chr9:135479756..135479863,+;peak:chr9:135479799..135479800,+;peakCounts:482.4	3449	+	135479799	ENST00000356818.7	ENSG00000196422.11	promoter	ENSG00000196422	PPP1R26
-0.0274161	3.95128	14.8843	0.000869395	0.0729727	rDPI_49728	chr8	28701586	28701599	chr8:28701586..28701599,chr8:28701434..28701673,+;peak:chr8:28701591..28701592,+;peakCounts:1732.7	7505	+	28701591	ENST00000519886.5	ENSG00000012232.9	alternative	ENSG00000012232	EXTL3
0.0283285	2.07898	14.8838	0.000869537	0.0729727	rDPI_26459	chr19	42242567	42242570	chr19:42242567..42242570,chr19:42242505..42242712,-;peak:chr19:42242568..42242569,-;peakCounts:1103.4	1522	-	42242568	ENST00000676537.1	ENSG00000105723.13	alternative	ENSG00000105723	GSK3A
-0.0296014	2.60818	14.8796	0.000870677	0.0729727	rDPI_25705	chr19	19527332	19527344	chr19:19527332..19527344,chr19:19527276..19527369,+;peak:chr19:19527337..19527338,+;peakCounts:1044.9	1866	+	19527337	ENST00000436027.9	ENSG00000250067.12	alternative	ENSG00000250067	YJEFN3
0.0610911	2.45	14.8779	0.000871142	0.0729727	rDPI_50572	chr8	103371535	103371556	chr8:103371535..103371556,chr8:103371449..103371647,+;peak:chr8:103371550..103371551,+;peakCounts:919.8	3660	+	103371550	ENST00000330295.10	ENSG00000164932.13	promoter	ENSG00000164932	CTHRC1
0.0424156	1.90868	14.8713	0.000872937	0.0729727	rDPI_28101	chr2	31234147	31234156	chr2:31234147..31234156,chr2:31233926..31234248,+;peak:chr2:31234152..31234153,+;peakCounts:1573.3	2731	+	31234152	ENST00000322054.10	ENSG00000013016.16	promoter	ENSG00000013016	EHD3
0.030346	1.96931	14.87	0.000873298	0.0729727	rDPI_24499	chr19	1941165	1941169	chr19:1941165..1941169,chr19:1941093..1941253,+;peak:chr19:1941166..1941167,+;peakCounts:1474.9	1771	+	1941166	ENST00000255641.13	ENSG00000133275.16	alternative	ENSG00000133275	CSNK1G2
-0.02389	1.42647	18.9989	0.000873911	0.0729727	rDPI_46149	chr6	138650962	138650965	chr6:138650962..138650965,-	420	-	138650964	ENST00000405630.1	ENSG00000216802.1	promoter	ENSG00000216802	NA
0.0390473	1.61218	14.8589	0.00087633	0.0730812	rDPI_41046	chr4	176792922	176792927	chr4:176792922..176792927,-	1842	-	176792922	ENST00000618562.2	ENSG00000150630.4	promoter	ENSG00000150630	VEGFC
0.0209288	4.47957	14.8505	0.000878652	0.0731814	rDPI_44604	chr6	31795713	31795762	chr6:31795713..31795762,chr6:31795606..31795794,-;peak:chr6:31795752..31795753,-;peakCounts:1609.2	11700	-	31795752	ENST00000375663.8	ENSG00000204394.13	promoter	ENSG00000204394	VARS1
0.0293599	1.82346	14.8436	0.000880568	0.0732475	rDPI_47641	chr7	74083887	74083893	chr7:74083887..74083893,-	928	-	74083888	ENST00000435932.1	ENSG00000232415.1	alternative	ENSG00000232415	NA
-0.0246159	1.42386	14.8351	0.000882903	0.0733484	rDPI_20004	chr16	66934456	66934459	chr16:66934456..66934459,chr16:66934406..66934583,+;peak:chr16:66934457..66934458,+;peakCounts:296.7	519	+	66934457	ENST00000561697.5	ENSG00000172831.14	alternative	ENSG00000172831	CES2
-0.0331623	1.89153	14.8294	0.000884478	0.0733859	rDPI_16602	chr14	103405163	103405166	chr14:103405163..103405166,chr14:103405067..103405182,+;peak:chr14:103405165..103405166,+;peakCounts:146.6	1331	+	103405165	ENST00000561071.5	ENSG00000075413.19	alternative	ENSG00000075413	MARK3
0.0321836	2.24447	14.8045	0.000891423	0.0736443	rDPI_48733	chr7	130070530	130070540	chr7:130070530..130070540,chr7:130070495..130070759,+;peak:chr7:130070534..130070535,+;peakCounts:2116.2	3839	+	130070534	ENST00000335420.10	ENSG00000128607.14	alternative	ENSG00000128607	KLHDC10
-0.0484677	4.61103	14.8008	0.00089246	0.0736443	rDPI_11816	chr12	52949111	52949122	chr12:52949111..52949122,chr12:52948977..52949262,+;peak:chr12:52949121..52949122,+;peakCounts:1990.8	7520	+	52949121	ENST00000388835.4	ENSG00000111057.11	promoter	ENSG00000111057	KRT18
-0.0489258	2.39844	14.7963	0.000893713	0.0736443	rDPI_54726	chrX	126472694	126472702	chrX:126472694..126472702,chrX:126472543..126472705,-;peak:chrX:126472699..126472700,-;peakCounts:4754.7	6943	-	126472699	ENST00000622603.2	ENSG00000274901.2	not_classified	ENSG00000274901	OR4W1P
0.0256961	3.71363	14.7914	0.000895104	0.0736443	rDPI_10653	chr11	126304056	126304065	chr11:126304056..126304065,chr11:126304025..126304131,+;peak:chr11:126304062..126304063,+;peakCounts:3331.8	8794	+	126304062	ENST00000263579.5	ENSG00000110063.10	promoter	ENSG00000110063	DCPS
0.0320957	1.89856	14.79	0.000895488	0.0736443	rDPI_51777	chr9	70413669	70413680	chr9:70413669..70413680,chr9:70413341..70413737,-;peak:chr9:70413674..70413675,-;peakCounts:948.6	1287	-	70413674	ENST00000377126.3	ENSG00000119138.4	alternative	ENSG00000119138	KLF9
-0.044358	2.4212	14.7889	0.000895807	0.0736443	rDPI_35344	chr22	38485845	38485861	chr22:38485845..38485861,chr22:38485834..38486021,-;peak:chr22:38485854..38485855,-;peakCounts:268	1288	-	38485854	ENST00000431312.2	ENSG00000100201.23	alternative	ENSG00000100201	DDX17
-0.0212562	4.7934	14.7849	0.000896933	0.0736443	rDPI_36774	chr3	48918841	48918852	chr3:48918841..48918852,chr3:48918790..48918985,+;peak:chr3:48918848..48918849,+;peakCounts:3763.4	14792	+	48918848	ENST00000495761.5	ENSG00000177479.20	alternative	ENSG00000177479	ARIH2
-0.0430733	1.8088	14.782	0.000897742	0.0736443	rDPI_14948	chr14	23398737	23398747	chr14:23398737..23398747,chr14:23398726..23399041,-;peak:chr14:23398742..23398743,-;peakCounts:264.2	567	-	23398742	ENST00000557461.2	ENSG00000197616.13	alternative	ENSG00000197616	MYH6
0.0442681	3.92827	14.782	0.000897744	0.0736443	rDPI_48727	chr7	129952910	129952925	chr7:129952910..129952925,chr7:129952515..129953011,-;peak:chr7:129952920..129952921,-;peakCounts:5053.2	18253	-	129952920	ENST00000472396.5	ENSG00000186591.13	alternative	ENSG00000186591	UBE2H
0.0252077	2.79373	14.7751	0.000899704	0.0737125	rDPI_15482	chr14	35046399	35046410	chr14:35046399..35046410,chr14:35046218..35046703,+;peak:chr14:35046404..35046405,+;peakCounts:830.6	4652	+	35046404	ENST00000382406.7	ENSG00000151327.13	alternative	ENSG00000151327	FAM177A1
0.0377945	2.75581	14.7612	0.000903633	0.0739207	rDPI_29179	chr2	96870070	96870086	chr2:96870070..96870086,chr2:96870033..96870120,-;peak:chr2:96870080..96870081,-;peakCounts:1630.8	3536	-	96870080	ENST00000305476.10	ENSG00000168758.11	promoter	ENSG00000168758	SEMA4C
0.0445306	2.54493	14.7548	0.000905457	0.0739207	rDPI_51473	chr9	34318274	34318275	chr9:34318274..34318275,+	3173	+	34318274	ENST00000419794.1	ENSG00000229207.1	not_classified	ENSG00000229207	NA
-0.027462	5.9105	14.751	0.000906531	0.0739207	rDPI_25863	chr19	34172499	34172551	chr19:34172499..34172551,chr19:34172407..34172750,+;peak:chr19:34172525..34172526,+;peakCounts:6219	25142	+	34172525	ENST00000589878.5	ENSG00000257103.9	promoter	ENSG00000257103	LSM14A
0.0323512	3.4573	14.7502	0.000906774	0.0739207	rDPI_33164	chr20	32358318	32358338	chr20:32358318..32358338,chr20:32358307..32358369,+;peak:chr20:32358331..32358332,+;peakCounts:1524.6	6270	+	32358331	ENST00000651418.1	ENSG00000171456.20	promoter	ENSG00000171456	ASXL1
0.0313352	2.9201	14.7289	0.000912862	0.0741061	rDPI_49664	chr8	26513871	26513874	chr8:26513871..26513874,chr8:26513864..26513915,-;peak:chr8:26513871..26513872,-;peakCounts:719.1	1719	-	26513871	ENST00000522362.7	ENSG00000240694.9	promoter	ENSG00000240694	PNMA2
-0.0531018	5.19982	14.7251	0.000913966	0.0741061	rDPI_14827	chr14	23384957	23384984	chr14:23384957..23384984,chr14:23384914..23385066,-;peak:chr14:23384974..23384975,-;peakCounts:1612.8	10098	-	23384974	ENST00000651452.1	ENSG00000197616.13	alternative	ENSG00000197616	MYH6
-0.0337148	1.53324	14.7247	0.000914075	0.0741061	rDPI_5592	chr10	11743053	11743054	chr10:11743053..11743054,chr10:11742974..11743056,-;peak:chr10:11743053..11743054,-;peakCounts:415.8	462	-	11743053	ENST00000609104.5	ENSG00000148429.14	enhancer	ENSG00000148429	USP6NL
-0.025421	4.16878	14.7232	0.000914506	0.0741061	rDPI_32926	chr20	10434220	10434224	chr20:10434220..10434224,chr20:10434112..10434275,-;peak:chr20:10434222..10434223,-;peakCounts:3456.6	7358	-	10434222	ENST00000347364.7	ENSG00000125863.20	alternative	ENSG00000125863	MKKS
0.039201	2.50502	14.7191	0.000915674	0.0741061	rDPI_13619	chr12	128823980	128823997	chr12:128823980..128823997,chr12:128823836..128824039,-;peak:chr12:128823983..128823984,-;peakCounts:758.7	2933	-	128823983	ENST00000266771.10	ENSG00000139370.12	promoter	ENSG00000139370	SLC15A4
-0.0311683	2.89669	14.7149	0.000916888	0.0741061	rDPI_38146	chr3	139539586	139539597	chr3:139539586..139539597,chr3:139539505..139539758,-;peak:chr3:139539586..139539587,-;peakCounts:1091.7	1826	-	139539586	ENST00000619087.4	ENSG00000114115.10	alternative	ENSG00000114115	RBP1
0.0405812	3.67767	14.7123	0.000917657	0.0741061	rDPI_24913	chr19	7830214	7830223	chr19:7830214..7830223,chr19:7830157..7830344,+;peak:chr19:7830218..7830219,+;peakCounts:2554.2	6802	+	7830218	ENST00000270530.8	ENSG00000142459.8	promoter	ENSG00000142459	EVI5L
0.0263615	2.00207	14.7106	0.000918126	0.0741061	rDPI_40339	chr4	109802109	109802114	chr4:109802109..109802114,chr4:109801987..109802226,-;peak:chr4:109802109..109802110,-;peakCounts:1075.5	1492	-	109802109	ENST00000394634.7	ENSG00000205403.14	promoter	ENSG00000205403	CFI
0.0326682	2.78242	14.6969	0.000922093	0.0742271	rDPI_36046	chr3	14810454	14810571	chr3:14810454..14810571,chr3:14810454..14810571,+	4511	+	14810543	ENST00000640506.1	ENSG00000154783.12	enhancer	ENSG00000154783	FGD5
-0.0343114	2.25505	14.6943	0.00092285	0.0742271	rDPI_44629	chr6	31829858	31829886	chr6:31829858..31829886,chr6:31829736..31830135,+;peak:chr6:31829880..31829881,+;peakCounts:506.7	1556	+	31829880	ENST00000649802.1	ENSG00000285565.1	enhancer	ENSG00000285565	NA
-0.0322724	3.18745	14.6889	0.000924444	0.0742271	rDPI_38893	chr3	195543296	195543304	chr3:195543296..195543304,chr3:195543189..195543365,-;peak:chr3:195543298..195543299,-;peakCounts:701.5	3308	-	195543298	ENST00000618156.5	ENSG00000184203.8	alternative	ENSG00000184203	PPP1R2
0.0354434	5.3944	14.6864	0.000925155	0.0742271	rDPI_48729	chr7	129952950	129952966	chr7:129952950..129952966,chr7:129952515..129953011,-;peak:chr7:129952960..129952961,-;peakCounts:12589.2	38360	-	129952960	ENST00000355621.8	ENSG00000186591.13	promoter	ENSG00000186591	UBE2H
-0.0306105	2.3173	14.685	0.000925558	0.0742271	rDPI_39452	chr4	39638957	39638963	chr4:39638957..39638963,chr4:39638831..39639089,-;peak:chr4:39638962..39638963,-;peakCounts:783.6	1320	-	39638962	ENST00000505729.1	ENSG00000163683.12	alternative	ENSG00000163683	SMIM14
0.0392548	2.09741	14.6792	0.000927256	0.0742271	rDPI_47825	chr7	81770042	81770053	chr7:81770042..81770053,chr7:81769989..81770164,-;peak:chr7:81770047..81770048,-;peakCounts:1061.1	1459	-	81770047	ENST00000222390.11	ENSG00000019991.18	promoter	ENSG00000019991	HGF
0.0363657	3.65671	14.6775	0.00092776	0.0742271	rDPI_2695	chr1	114511175	114511225	chr1:114511175..114511225,chr1:114511080..114511253,-;peak:chr1:114511203..114511204,-;peakCounts:1899	7758	-	114511203	ENST00000358465.7	ENSG00000197323.12	promoter	ENSG00000197323	TRIM33
0.0333683	1.92058	14.6742	0.00092872	0.0742271	rDPI_22669	chr17	62966230	62966244	chr17:62966230..62966244,chr17:62966177..62966311,+;peak:chr17:62966235..62966236,+;peakCounts:1012.5	2099	+	62966235	ENST00000384821.1	ENSG00000207552.1	enhancer	ENSG00000207552	MIR633
-0.032925	9.64467	14.6505	0.000935702	0.0745505	rDPI_1600	chr1	45521883	45521885	chr1:45521883..45521885,chr1:45521797..45522036,-;peak:chr1:45521883..45521884,-;peakCounts:139848.3	228081	-	45521883	ENST00000319248.13	ENSG00000117450.15	promoter	ENSG00000117450	PRDX1
-0.0344658	5.40589	14.6503	0.000935762	0.0745505	rDPI_3475	chr1	156591766	156591782	chr1:156591766..156591782,chr1:156591730..156591977,+;peak:chr1:156591776..156591777,+;peakCounts:13038.3	41444	+	156591776	ENST00000679649.1	ENSG00000163382.13	promoter	ENSG00000163382	NAXE
0.0277749	1.54457	14.6488	0.000936191	0.0745505	rDPI_5201	chr1	236686294	236686303	chr1:236686294..236686303,chr1:236686268..236686368,+;peak:chr1:236686297..236686298,+;peakCounts:371.1	893	+	236686297	ENST00000542672.6	ENSG00000077522.14	alternative	ENSG00000077522	ACTN2
-0.0482549	4.73242	14.6428	0.000937959	0.0746003	rDPI_53363	chrM	5291	5297	chrM:5291..5297,chrM:5245..5581,+;peak:chrM:5294..5295,+;peakCounts:363.599999999999	12664	+	5294	ENST00000387382.1	ENSG00000210117.1	alternative	ENSG00000210117	NA
0.0275042	1.30723	14.6321	0.000941148	0.0747571	rDPI_18616	chr16	381962	381965	chr16:381962..381965,chr16:381868..382020,-;peak:chr16:381963..381964,-;peakCounts:160.7	604	-	381963	ENST00000250930.7	ENSG00000129925.11	alternative	ENSG00000129925	PGAP6
0.0309355	2.52372	14.6178	0.000945398	0.0747571	rDPI_52743	chr9	127917037	127917045	chr9:127917037..127917045,chr9:127916950..127917073,-;peak:chr9:127917041..127917042,-;peakCounts:1396.8	3073	-	127917041	ENST00000335791.10	ENSG00000136840.19	alternative	ENSG00000136840	ST6GALNAC4
-0.0251	1.31205	14.6178	0.0009454	0.0747571	rDPI_29129	chr2	96186185	96186197	chr2:96186185..96186197,chr2:96186180..96186378,-;peak:chr2:96186191..96186192,-;peakCounts:295.2	509	-	96186191	ENST00000479456.1	ENSG00000084090.14	enhancer	ENSG00000084090	STARD7
-0.0248815	2.5638	14.6117	0.000947223	0.0747571	rDPI_8971	chr11	60914206	60914212	chr11:60914206..60914212,chr11:60913882..60914260,+;peak:chr11:60914211..60914212,+;peakCounts:297.4	2198	+	60914211	ENST00000227525.8	ENSG00000110108.10	alternative	ENSG00000110108	TMEM109
-0.0420422	2.29624	14.6103	0.000947632	0.0747571	rDPI_8379	chr11	18588808	18588820	chr11:18588808..18588820,chr11:18588747..18588981,+;peak:chr11:18588815..18588816,+;peakCounts:769.5	1522	+	18588815	ENST00000636313.1	ENSG00000247595.4	alternative	ENSG00000247595	SPTY2D1OS
-0.0362425	1.16115	14.6011	0.000950398	0.0747571	rDPI_32056	chr2	216695389	216695393	chr2:216695389..216695393,chr2:216695222..216695448,-;peak:chr2:216695392..216695393,-;peakCounts:19.4	147	-	216695392	ENST00000233813.5	ENSG00000115461.5	alternative	ENSG00000115461	IGFBP5
0.0299809	1.25441	14.5985	0.000951188	0.0747571	rDPI_39194	chr4	6472609	6472624	chr4:6472609..6472624,chr4:6472501..6472624,-;peak:chr4:6472614..6472615,-;peakCounts:261.9	596	-	6472614	ENST00000382599.9	ENSG00000074211.14	alternative	ENSG00000074211	PPP2R2C
0.0288182	3.45515	14.5961	0.000951893	0.0747571	rDPI_517	chr1	15409887	15409900	chr1:15409887..15409900,chr1:15409869..15409981,+;peak:chr1:15409895..15409896,+;peakCounts:3970.8	8249	+	15409895	ENST00000375980.9	ENSG00000142634.13	alternative	ENSG00000142634	EFHD2
0.0384633	4.33389	14.5865	0.000954789	0.0747571	rDPI_9250	chr11	64246933	64246951	chr11:64246933..64246951,chr11:64246546..64246976,-;peak:chr11:64246938..64246939,-;peakCounts:2236.1	11779	-	64246938	ENST00000309318.8	ENSG00000173457.11	promoter	ENSG00000173457	PPP1R14B
-0.0493958	2.20376	14.586	0.000954942	0.0747571	rDPI_21795	chr17	39668612	39668630	chr17:39668612..39668630,chr17:39668585..39668660,+;peak:chr17:39668619..39668620,+;peakCounts:214.2	1243	+	39668619	ENST00000581428.1	ENSG00000141744.4	alternative	ENSG00000141744	PNMT
-0.0314081	1.74352	14.5838	0.000955609	0.0747571	rDPI_24367	chr19	709120	709124	chr19:709120..709124,chr19:709090..709156,+;peak:chr19:709120..709121,+;peakCounts:627.5	1375	+	709120	ENST00000589012.5	ENSG00000099864.18	alternative	ENSG00000099864	PALM
0.0399741	3.48149	14.5829	0.00095587	0.0747571	rDPI_1104	chr1	30908713	30908733	chr1:30908713..30908733,chr1:30908675..30908828,-;peak:chr1:30908723..30908724,-;peakCounts:1625.3	5678	-	30908723	ENST00000339394.7	ENSG00000162512.16	alternative	ENSG00000162512	SDC3
-0.0262087	1.90933	14.5828	0.000955927	0.0747571	rDPI_17844	chr15	67521248	67521250	chr15:67521248..67521250,chr15:67521078..67521473,+;peak:chr15:67521249..67521250,+;peakCounts:748.1	1407	+	67521249	ENST00000342683.6	ENSG00000189227.6	alternative	ENSG00000189227	C15orf61
0.025284	1.45427	14.5827	0.000955958	0.0747571	rDPI_16096	chr14	74302968	74302974	chr14:74302968..74302974,chr14:74302917..74303010,-;peak:chr14:74302973..74302974,-;peakCounts:364.7	850	-	74302973	ENST00000553745.5	ENSG00000119688.21	alternative	ENSG00000119688	ABCD4
0.0288362	2.00798	14.567	0.000960705	0.0750384	rDPI_31632	chr2	190649035	190649065	chr2:190649035..190649065,chr2:190648757..190649353,+;peak:chr2:190649049..190649050,+;peakCounts:220.5	2002	+	190649049	ENST00000409581.5	ENSG00000138386.17	alternative	ENSG00000138386	NAB1
0.0296044	3.70769	14.5604	0.000962697	0.0750851	rDPI_50048	chr8	56993818	56993825	chr8:56993818..56993825,chr8:56993597..56993905,-;peak:chr8:56993821..56993822,-;peakCounts:3619.9	7740	-	56993821	ENST00000262644.9	ENSG00000104331.9	alternative	ENSG00000104331	BPNT2
0.0397411	2.83885	14.5539	0.000964684	0.0750851	rDPI_46740	chr7	2631943	2631964	chr7:2631943..2631964,chr7:2631911..2632070,+;peak:chr7:2631955..2631956,+;peakCounts:412.8	3351	+	2631955	ENST00000258796.12	ENSG00000136295.15	promoter	ENSG00000136295	TTYH3
-0.0250907	3.54242	14.5537	0.000964752	0.0750851	rDPI_11906	chr12	54280103	54280106	chr12:54280103..54280106,chr12:54280028..54280183,-;peak:chr12:54280103..54280104,-;peakCounts:5090.1	7890	-	54280103	ENST00000209875.9	ENSG00000094916.16	alternative	ENSG00000094916	CBX5
-0.0460345	1.60174	14.549	0.000966193	0.0751077	rDPI_2123	chr1	78004554	78004555	chr1:78004554..78004555,-	1164	-	78004554	ENST00000608684.1	ENSG00000273338.1	promoter	ENSG00000273338	NA
-0.0335733	1.90016	14.5416	0.000968441	0.0751929	rDPI_25704	chr19	19527293	19527304	chr19:19527293..19527304,chr19:19527276..19527369,+;peak:chr19:19527298..19527299,+;peakCounts:616.9	1019	+	19527298	ENST00000436027.9	ENSG00000250067.12	alternative	ENSG00000250067	YJEFN3
0.0339791	2.5904	14.5332	0.000971036	0.0753049	rDPI_33223	chr20	34476492	34476493	chr20:34476492..34476493,-	2527	-	34476492	ENST00000449115.1	ENSG00000181741.7	promoter	ENSG00000181741	NA
-0.0261907	3.23596	14.524	0.000973851	0.0754336	rDPI_36683	chr3	47803133	47803143	chr3:47803133..47803143,chr3:47803098..47803205,+;peak:chr3:47803138..47803139,+;peakCounts:2109.2	4709	+	47803138	ENST00000395745.6	ENSG00000132153.15	alternative	ENSG00000132153	DHX30
-0.031363	1.15719	14.5193	0.000975317	0.0754577	rDPI_47793	chr7	80594486	80594509	chr7:80594486..80594509,chr7:80594353..80594553,+;peak:chr7:80594503..80594504,+;peakCounts:670.5	1842	+	80594503	ENST00000480599.6	ENSG00000135218.19	enhancer	ENSG00000135218	CD36
-0.0216215	4.26228	14.5145	0.0009768	0.0754655	rDPI_12220	chr12	57522837	57522867	chr12:57522837..57522867,chr12:57522791..57522896,+;peak:chr12:57522851..57522852,+;peakCounts:1553.4	10053	+	57522851	ENST00000546632.1	ENSG00000166987.15	promoter	ENSG00000166987	MBD6
-0.0253204	1.68661	14.5101	0.000978165	0.0754655	rDPI_53684	chrX	17860721	17860727	chrX:17860721..17860727,chrX:17860631..17861074,-;peak:chrX:17860721..17860722,-;peakCounts:404.8	518	-	17860721	ENST00000360011.5	ENSG00000131831.18	alternative	ENSG00000131831	RAI2
-0.0291093	3.00531	14.507	0.000979137	0.0754655	rDPI_28608	chr2	66435120	66435131	chr2:66435120..66435131,chr2:66435075..66435207,+;peak:chr2:66435125..66435126,+;peakCounts:2340.9	2835	+	66435125	ENST00000272369.14	ENSG00000143995.20	alternative	ENSG00000143995	MEIS1
-0.029707	1.72968	14.504	0.000980041	0.0754655	rDPI_10227	chr11	111878935	111878952	chr11:111878935..111878952,chr11:111878900..111879024,+;peak:chr11:111878942..111878943,+;peakCounts:684	1707	+	111878942	ENST00000528125.5	ENSG00000137720.8	alternative	ENSG00000137720	C11orf1
-0.0288592	1.1128	14.4707	0.000990471	0.0761788	rDPI_48101	chr7	99460178	99460182	chr7:99460178..99460182,chr7:99460108..99460194,-;peak:chr7:99460181..99460182,-;peakCounts:393.4	511	-	99460181	ENST00000491560.1	ENSG00000241468.8	alternative	ENSG00000241468	ATP5MF
0.0423456	9.91299	14.4577	0.000994545	0.0764021	rDPI_47027	chr7	25125222	25125390	chr7:25125222..25125390,chr7:25125222..25125390,-	500557	-	25125260	ENST00000305786.7	ENSG00000172115.9	promoter	ENSG00000172115	CYCS
0.037362	2.22664	14.4494	0.000997175	0.0765142	rDPI_5083	chr1	231040248	231040258	chr1:231040248..231040258,chr1:231040181..231040284,-;peak:chr1:231040253..231040254,-;peakCounts:597.9	1373	-	231040253	ENST00000366654.5	ENSG00000182118.8	alternative	ENSG00000182118	FAM89A
-0.0369949	5.57256	14.4331	0.00100235	0.0767728	rDPI_24360	chr19	676392	676395	chr19:676392..676395,chr19:676322..676515,+;peak:chr19:676392..676393,+;peakCounts:14591.7	26005	+	676392	ENST00000166139.9	ENSG00000070404.10	promoter	ENSG00000070404	FSTL3
-0.0695048	2.63917	14.4314	0.0010029	0.0767728	rDPI_29624	chr2	134441537	134441544	chr2:134441537..134441544,chr2:134441416..134441627,+;peak:chr2:134441540..134441541,+;peakCounts:583.2	828	+	134441540	ENST00000281923.4	ENSG00000152127.9	alternative	ENSG00000152127	MGAT5
-0.029409	2.1643	14.4181	0.00100713	0.0770068	rDPI_19574	chr16	30893996	30894002	chr16:30893996..30894002,chr16:30893953..30894221,-;peak:chr16:30893996..30893997,-;peakCounts:226.1	1165	-	30893996	ENST00000572628.5	ENSG00000099385.12	alternative	ENSG00000099385	BCL7C
-0.0273287	3.60936	14.4121	0.00100905	0.0770633	rDPI_15585	chr14	49633971	49633983	chr14:49633971..49633983,chr14:49633939..49634043,-;peak:chr14:49633977..49633978,-;peakCounts:1556.1	4881	-	49633977	ENST00000406043.3	ENSG00000165506.15	enhancer	ENSG00000165506	DNAAF2
-0.0289151	1.07911	14.4025	0.00101215	0.0772026	rDPI_54202	chrX	65735398	65735412	chrX:65735398..65735412,chrX:65735268..65735428,+;peak:chrX:65735403..65735404,+;peakCounts:162	366	+	65735403	ENST00000615934.1	ENSG00000276689.1	enhancer	ENSG00000276689	NA
0.0356031	2.13798	14.3991	0.00101324	0.0772026	rDPI_51845	chr9	78031779	78031807	chr9:78031779..78031807,chr9:78031717..78031998,-;peak:chr9:78031787..78031788,-;peakCounts:345.5	2614	-	78031787	ENST00000286548.9	ENSG00000156052.11	promoter	ENSG00000156052	GNAQ
-0.027381	1.13096	14.3935	0.00101505	0.0772075	rDPI_2470	chr1	108699416	108699427	chr1:108699416..108699427,chr1:108699272..108699624,+;peak:chr1:108699421..108699422,+;peakCounts:132	229	+	108699421	ENST00000485810.1	ENSG00000134186.12	alternative	ENSG00000134186	PRPF38B
0.0337533	2.25123	14.3916	0.00101567	0.0772075	rDPI_25506	chr19	16572392	16572400	chr19:16572392..16572400,chr19:16572367..16572444,-;peak:chr19:16572397..16572398,-;peakCounts:697.4	1573	-	16572397	ENST00000595753.6	ENSG00000127526.15	alternative	ENSG00000127526	SLC35E1
-0.0264139	1.16155	14.7806	0.00101793	0.0772824	rDPI_33763	chr20	55074610	55074619	chr20:55074610..55074619,+	545	+	55074616	ENST00000432629.1	ENSG00000185834.10	promoter	ENSG00000185834	NA
-0.0284742	4.58751	14.3812	0.00101902	0.0772824	rDPI_1629	chr1	45913588	45913598	chr1:45913588..45913598,chr1:45913522..45913672,+;peak:chr1:45913592..45913593,+;peakCounts:6137.1	10865	+	45913592	ENST00000372008.6	ENSG00000086015.22	promoter	ENSG00000086015	MAST2
0.0392877	3.14152	14.377	0.00102039	0.0772963	rDPI_5059	chr1	229626056	229626069	chr1:229626056..229626069,chr1:229625947..229626180,-;peak:chr1:229626056..229626057,-;peakCounts:2175.3	3497	-	229626056	ENST00000258281.6	ENSG00000135801.10	promoter	ENSG00000135801	TAF5L
-0.0356343	1.67429	14.3708	0.00102241	0.0773585	rDPI_19270	chr16	23141221	23141226	chr16:23141221..23141226,chr16:23141155..23141284,-;peak:chr16:23141221..23141222,-;peakCounts:106.4	332	-	23141221	ENST00000219689.11	ENSG00000103404.14	alternative	ENSG00000103404	USP31
0.0431267	1.44906	14.3659	0.00102399	0.0773585	rDPI_44724	chr6	33009572	33009582	chr6:33009572..33009582,chr6:33009544..33009634,-;peak:chr6:33009576..33009577,-;peakCounts:637.2	1101	-	33009576	ENST00000374813.1	ENSG00000204252.14	promoter	ENSG00000204252	HLA-DOA
-0.0282583	5.83949	14.3605	0.00102575	0.0773585	rDPI_19863	chr16	57245234	57245289	chr16:57245234..57245289,chr16:57245038..57245399,+;peak:chr16:57245259..57245260,+;peakCounts:10717.2	32355	+	57245259	ENST00000565794.1	ENSG00000102931.8	promoter	ENSG00000102931	ARL2BP
-0.0278553	5.92457	14.3599	0.00102595	0.0773585	rDPI_24611	chr19	3366583	3366589	chr19:3366583..3366589,chr19:3366544..3366648,+;peak:chr19:3366583..3366584,+;peakCounts:27071.1	35111	+	3366583	ENST00000590282.5	ENSG00000141905.19	promoter	ENSG00000141905	NFIC
-0.0315357	2.01163	14.3559	0.00102725	0.0773669	rDPI_27103	chr19	51353279	51353290	chr19:51353279..51353290,chr19:51353138..51353297,-;peak:chr19:51353284..51353285,-;peakCounts:519.9	1189	-	51353284	ENST00000354232.8	ENSG00000105379.10	alternative	ENSG00000105379	ETFB
-0.0257866	2.01868	14.3465	0.00103032	0.0775093	rDPI_8966	chr11	60913953	60913959	chr11:60913953..60913959,chr11:60913882..60914260,+;peak:chr11:60913953..60913954,+;peakCounts:249.4	1094	+	60913953	ENST00000227525.8	ENSG00000110108.10	alternative	ENSG00000110108	TMEM109
0.0569867	3.38947	14.3369	0.00103349	0.0775364	rDPI_29338	chr2	106065681	106065693	chr2:106065681..106065693,chr2:106065609..106065764,+;peak:chr2:106065688..106065689,+;peakCounts:2216.7	4203	+	106065688	ENST00000238044.8	ENSG00000119147.10	promoter	ENSG00000119147	ECRG4
-0.0254605	4.70257	14.3357	0.00103388	0.0775364	rDPI_43491	chr5	163505637	163505643	chr5:163505637..163505643,chr5:163505525..163505758,+;peak:chr5:163505639..163505640,+;peakCounts:4848.4	13532	+	163505639	ENST00000520449.1	ENSG00000038274.17	alternative	ENSG00000038274	MAT2B
-0.0348456	3.41382	14.3346	0.00103425	0.0775364	rDPI_27029	chr19	49818277	49818282	chr19:49818277..49818282,chr19:49818247..49818413,+;peak:chr19:49818279..49818280,+;peakCounts:1695.2	5103	+	49818279	ENST00000593595.1	ENSG00000104973.19	alternative	ENSG00000104973	MED25
0.0393307	2.40417	14.3239	0.00103777	0.0775916	rDPI_24502	chr19	1941192	1941198	chr19:1941192..1941198,chr19:1941093..1941253,+;peak:chr19:1941194..1941195,+;peakCounts:1507.9	3011	+	1941194	ENST00000255641.13	ENSG00000133275.16	alternative	ENSG00000133275	CSNK1G2
0.0437474	2.75356	14.3205	0.0010389	0.0775916	rDPI_34528	chr21	43865169	43865187	chr21:43865169..43865187,chr21:43865061..43865319,+;peak:chr21:43865176..43865177,+;peakCounts:1285	4469	+	43865176	ENST00000291572.13	ENSG00000160216.21	alternative	ENSG00000160216	AGPAT3
0.0217688	5.33064	14.3182	0.00103966	0.0775916	rDPI_10351	chr11	115504413	115504416	chr11:115504413..115504416,chr11:115504334..115504495,-;peak:chr11:115504415..115504416,-;peakCounts:26215.2	29403	-	115504415	ENST00000331581.11	ENSG00000182985.18	promoter	ENSG00000182985	CADM1
-0.0378671	3.51441	14.318	0.00103974	0.0775916	rDPI_33563	chr20	45406588	45406597	chr20:45406588..45406597,chr20:45406541..45406760,+;peak:chr20:45406588..45406589,+;peakCounts:1659	5786	+	45406588	ENST00000372717.5	ENSG00000244274.8	alternative	ENSG00000244274	DBNDD2
0.0627017	2.78001	14.3017	0.00104514	0.0778705	rDPI_24909	chr19	7747532	7747541	chr19:7747532..7747541,chr19:7747508..7747624,-;peak:chr19:7747534..7747535,-;peakCounts:1558.8	2791	-	7747534	ENST00000315599.12	ENSG00000090659.18	promoter	ENSG00000090659	CD209
0.0311424	3.48547	14.2971	0.00104668	0.0778705	rDPI_31503	chr2	183038465	183038476	chr2:183038465..183038476,chr2:183038091..183038544,-;peak:chr2:183038470..183038471,-;peakCounts:1022.5	6881	-	183038470	ENST00000361354.9	ENSG00000061676.15	alternative	ENSG00000061676	NCKAP1
-0.0404069	5.21532	14.296	0.00104705	0.0778705	rDPI_9154	chr11	63614398	63614424	chr11:63614398..63614424,chr11:63614166..63614619,-;peak:chr11:63614407..63614408,-;peakCounts:5974.2	18843	-	63614407	ENST00000415826.3	ENSG00000176485.13	promoter	ENSG00000176485	PLAAT3
-0.026639	1.94701	14.2864	0.00105027	0.0779952	rDPI_36454	chr3	41681632	41681638	chr3:41681632..41681638,chr3:41681580..41681675,-;peak:chr3:41681635..41681636,-;peakCounts:303	406	-	41681635	ENST00000516600.1	ENSG00000252409.1	alternative	ENSG00000252409	NA
0.0420427	4.67202	14.2805	0.00105226	0.0779952	rDPI_20328	chr16	81035842	81035853	chr16:81035842..81035853,chr16:81035812..81035868,+;peak:chr16:81035842..81035843,+;peakCounts:10761.3	18908	+	81035842	ENST00000299575.5	ENSG00000166454.10	promoter	ENSG00000166454	ATMIN
0.0265066	1.23378	19.0133	0.00105231	0.0779952	rDPI_16492	chr14	99964463	99964466	chr14:99964463..99964466,+	1180	+	99964463	ENST00000604654.1	ENSG00000271198.1	promoter	ENSG00000271198	NA
-0.0376623	2.69057	14.269	0.00105611	0.07818	rDPI_29422	chr2	113235545	113235555	chr2:113235545..113235555,chr2:113235505..113235652,+;peak:chr2:113235548..113235549,+;peakCounts:619.2	2639	+	113235548	ENST00000624706.3	ENSG00000189223.15	promoter	ENSG00000189223	PAX8-AS1
-0.0421082	2.05713	14.2658	0.0010572	0.07818	rDPI_12385	chr12	68348530	68348541	chr12:68348530..68348541,chr12:68348525..68348615,-;peak:chr12:68348535..68348536,-;peakCounts:107.1	423	-	68348535	ENST00000653144.1	ENSG00000251301.7	promoter	ENSG00000251301	LINC02384
-0.0351962	1.70731	14.2541	0.00106115	0.0783832	rDPI_21896	chr17	41784234	41784253	chr17:41784234..41784253,chr17:41784225..41784288,-;peak:chr17:41784242..41784243,-;peakCounts:243.9	478	-	41784242	ENST00000437369.5	ENSG00000173801.17	enhancer	ENSG00000173801	JUP
-0.033787	2.46131	14.2362	0.00106724	0.0787443	rDPI_7187	chr10	101843963	101843970	chr10:101843963..101843970,chr10:101843943..101844025,-;peak:chr10:101843965..101843966,-;peakCounts:669.6	870	-	101843965	ENST00000355657.6	ENSG00000120049.20	alternative	ENSG00000120049	KCNIP2
0.0438803	3.39529	14.2252	0.00107101	0.0789331	rDPI_24296	chr18	79951649	79951659	chr18:79951649..79951659,chr18:79951593..79951693,-;peak:chr18:79951653..79951654,-;peakCounts:3151.8	5331	-	79951653	ENST00000397778.7	ENSG00000122490.19	promoter	ENSG00000122490	SLC66A2
-0.0301695	3.27919	14.2137	0.00107495	0.0790963	rDPI_22524	chr17	57988243	57988255	chr17:57988243..57988255,chr17:57988092..57988282,-;peak:chr17:57988248..57988249,-;peakCounts:1068.7	3676	-	57988248	ENST00000581208.2	ENSG00000136451.9	alternative	ENSG00000136451	VEZF1
-0.0294223	3.81901	14.209	0.00107657	0.0790963	rDPI_5995	chr10	42782800	42782809	chr10:42782800..42782809,chr10:42782770..42782836,+;peak:chr10:42782805..42782806,+;peakCounts:2952	7763	+	42782805	ENST00000374518.6	ENSG00000165733.8	promoter	ENSG00000165733	BMS1
0.0334762	2.01535	14.2081	0.00107686	0.0790963	rDPI_49172	chr7	151632434	151632441	chr7:151632434..151632441,chr7:151632037..151632493,-;peak:chr7:151632439..151632440,-;peakCounts:174.6	1895	-	151632439	ENST00000418337.6	ENSG00000106617.15	alternative	ENSG00000106617	PRKAG2
-0.0471967	3.27658	14.1915	0.0010826	0.0792126	rDPI_3843	chr1	169586476	169586482	chr1:169586476..169586482,chr1:169586384..169586577,-;peak:chr1:169586481..169586482,-;peakCounts:2601.9	3590	-	169586481	ENST00000367797.9	ENSG00000198734.12	promoter	ENSG00000198734	F5
0.0221796	4.08652	14.1901	0.0010831	0.0792126	rDPI_52077	chr9	96450160	96450170	chr9:96450160..96450170,chr9:96450068..96450565,+;peak:chr9:96450164..96450165,+;peakCounts:3946.4	15522	+	96450164	ENST00000375249.5	ENSG00000130956.14	alternative	ENSG00000130956	HABP4
0.0765227	2.12262	14.1886	0.00108362	0.0792126	rDPI_39800	chr4	73869393	73869394	chr4:73869393..73869394,chr4:73869267..73869443,+;peak:chr4:73869393..73869394,+;peakCounts:9697.5	10775	+	73869393	ENST00000509101.1	ENSG00000163739.5	promoter	ENSG00000163739	CXCL1
0.026007	6.28245	14.187	0.00108416	0.0792126	rDPI_25398	chr19	14117758	14117763	chr19:14117758..14117763,chr19:14117503..14117835,-;peak:chr19:14117762..14117763,-;peakCounts:13239.3	45776	-	14117762	ENST00000308677.9	ENSG00000072062.15	alternative	ENSG00000072062	PRKACA
-0.0309213	5.34778	14.1773	0.00108752	0.0792126	rDPI_35576	chr22	42649339	42649342	chr22:42649339..42649342,chr22:42649310..42649435,-;peak:chr22:42649340..42649341,-;peakCounts:7678.3	14012	-	42649340	ENST00000352397.10	ENSG00000100243.21	alternative	ENSG00000100243	CYB5R3
0.0595951	4.16098	14.1726	0.00108917	0.0792126	rDPI_18303	chr15	84817356	84817358	chr15:84817356..84817358,chr15:84817323..84817541,+;peak:chr15:84817356..84817357,+;peakCounts:14215.5	16575	+	84817356	ENST00000258888.6	ENSG00000136383.7	promoter	ENSG00000136383	ALPK3
0.0448068	5.50461	14.1709	0.00108976	0.0792126	rDPI_6591	chr10	79445624	79445625	chr10:79445624..79445625,chr10:79445398..79445712,-;peak:chr10:79445624..79445625,-;peakCounts:25300.8	28112	-	79445624	ENST00000372336.4	ENSG00000165424.7	promoter	ENSG00000165424	ZCCHC24
0.0257364	4.55097	14.1684	0.00109065	0.0792126	rDPI_23379	chr17	82418574	82418592	chr17:82418574..82418592,chr17:82418517..82418640,-;peak:chr17:82418586..82418587,-;peakCounts:6430.5	15758	-	82418586	ENST00000313056.10	ENSG00000181396.13	promoter	ENSG00000181396	OGFOD3
-0.0333544	1.66761	14.1665	0.00109131	0.0792126	rDPI_4350	chr1	202203703	202203718	chr1:202203703..202203718,chr1:202203680..202203795,+;peak:chr1:202203712..202203713,+;peakCounts:188.1	328	+	202203712	ENST00000255432.11	ENSG00000133067.18	promoter	ENSG00000133067	LGR6
-0.050213	2.13517	14.1655	0.00109164	0.0792126	rDPI_6429	chr10	72954801	72954816	chr10:72954801..72954816,chr10:72954781..72954893,-;peak:chr10:72954806..72954807,-;peakCounts:171.7	364	-	72954806	ENST00000373032.4	ENSG00000138308.6	alternative	ENSG00000138308	PLA2G12B
0.0397131	4.33095	14.1651	0.00109178	0.0792126	rDPI_21002	chr17	7479619	7479632	chr17:7479619..7479632,chr17:7479360..7479683,-;peak:chr17:7479631..7479632,-;peakCounts:3565.4	10781	-	7479631	ENST00000380599.9	ENSG00000174282.12	promoter	ENSG00000174282	ZBTB4
0.0293493	3.69053	14.1395	0.00110077	0.0797362	rDPI_4580	chr1	206684955	206684970	chr1:206684955..206684970,chr1:206684866..206685267,+;peak:chr1:206684960..206684961,+;peakCounts:964.9	7997	+	206684960	ENST00000294981.8	ENSG00000162889.11	alternative	ENSG00000162889	MAPKAPK2
-0.0323569	2.57041	14.1356	0.00110215	0.0797362	rDPI_48144	chr7	100148978	100148979	chr7:100148978..100148979,chr7:100148836..100149046,+;peak:chr7:100148978..100148979,+;peakCounts:964.3	2115	+	100148978	ENST00000468582.5	ENSG00000188186.10	alternative	ENSG00000188186	LAMTOR4
0.0383832	3.53721	14.1342	0.00110266	0.0797362	rDPI_51979	chr9	92482501	92482507	chr9:92482501..92482507,chr9:92482332..92482610,-;peak:chr9:92482506..92482507,-;peakCounts:9252	10635	-	92482506	ENST00000375544.7	ENSG00000106819.13	promoter	ENSG00000106819	ASPN
0.0354706	4.75898	14.1285	0.00110467	0.0797931	rDPI_29027	chr2	86199477	86199489	chr2:86199477..86199489,chr2:86199414..86199524,+;peak:chr2:86199482..86199483,+;peakCounts:12054.6	25343	+	86199482	ENST00000409180.1	ENSG00000132313.15	promoter	ENSG00000132313	MRPL35
0.0307406	4.80642	14.1227	0.00110673	0.079853	rDPI_19576	chr16	30894050	30894083	chr16:30894050..30894083,chr16:30893953..30894221,-;peak:chr16:30894055..30894056,-;peakCounts:6551.1	19189	-	30894055	ENST00000215115.5	ENSG00000099385.12	promoter	ENSG00000099385	BCL7C
-0.0263872	1.45892	14.1151	0.00110941	0.0799189	rDPI_36849	chr3	49533397	49533398	chr3:49533397..49533398,+	496	+	49533397	ENST00000296452.5	ENSG00000164061.5	not_classified	ENSG00000164061	BSN
-0.0353431	1.44765	14.1132	0.00111009	0.0799189	rDPI_14061	chr13	43053938	43053951	chr13:43053938..43053951,chr13:43053929..43054070,+;peak:chr13:43053942..43053943,+;peakCounts:422.5	918	+	43053942	ENST00000379221.4	ENSG00000120675.6	alternative	ENSG00000120675	DNAJC15
0.0332643	1.70396	14.1091	0.00111157	0.0799375	rDPI_21538	chr17	31094927	31094933	chr17:31094927..31094933,chr17:31094867..31095004,+;peak:chr17:31094927..31094928,+;peakCounts:388.1	1372	+	31094927	ENST00000487476.5	ENSG00000196712.18	alternative	ENSG00000196712	NF1
-0.0463734	3.48191	14.1054	0.00111289	0.0799445	rDPI_21772	chr17	39665861	39665872	chr17:39665861..39665872,chr17:39665714..39666514,+;peak:chr17:39665866..39665867,+;peakCounts:2837.1	7289	+	39665866	ENST00000309889.3	ENSG00000173991.6	alternative	ENSG00000173991	TCAP
-0.0488595	1.43218	14.0978	0.00111561	0.0800381	rDPI_34433	chr21	37751527	37751533	chr21:37751527..37751533,chr21:37751508..37751566,+;peak:chr21:37751527..37751528,+;peakCounts:734.4	907	+	37751527	ENST00000667151.1	ENSG00000286717.1	enhancer	ENSG00000286717	NA
0.0267605	2.213	14.0949	0.00111665	0.0800381	rDPI_9171	chr11	63813473	63813498	chr11:63813473..63813498,chr11:63813371..63813526,+;peak:chr11:63813492..63813493,+;peakCounts:666.9	1794	+	63813492	ENST00000294244.9	ENSG00000168005.9	promoter	ENSG00000168005	SPINDOC
-0.0289469	4.24572	14.0843	0.00112043	0.080184	rDPI_19021	chr16	7332840	7332850	chr16:7332840..7332850,chr16:7332706..7332901,+;peak:chr16:7332849..7332850,+;peakCounts:4341.6	9471	+	7332849	ENST00000620507.4	ENSG00000078328.22	promoter	ENSG00000078328	RBFOX1
0.0287521	2.31226	14.0824	0.00112114	0.080184	rDPI_48344	chr7	107044666	107044675	chr7:107044666..107044675,chr7:107044596..107044972,+;peak:chr7:107044666..107044667,+;peakCounts:278.8	2312	+	107044666	ENST00000265717.5	ENSG00000005249.13	alternative	ENSG00000005249	PRKAR2B
-0.0331114	3.29539	14.0732	0.00112444	0.0802867	rDPI_6639	chr10	84328631	84328638	chr10:84328631..84328638,chr10:84328538..84328697,+;peak:chr10:84328634..84328635,+;peakCounts:1353.5	3061	+	84328634	ENST00000224756.12	ENSG00000107771.17	alternative	ENSG00000107771	CCSER2
-0.0229145	6.54569	14.0701	0.00112556	0.0802867	rDPI_46452	chr6	158818234	158818236	chr6:158818234..158818236,chr6:158818154..158818309,-;peak:chr6:158818235..158818236,-;peakCounts:51052.5	58544	-	158818235	ENST00000337147.11	ENSG00000092820.18	promoter	ENSG00000092820	EZR
-0.0238128	1.35385	15.063	0.00112626	0.0802867	rDPI_44458	chr6	30556290	30556294	chr6:30556290..30556294,chr6:30556138..30556329,-;peak:chr6:30556292..30556293,-;peakCounts:17.5	423	-	30556292	ENST00000433809.1	ENSG00000204590.12	alternative	ENSG00000204590	GNL1
-0.0491653	2.66012	14.063	0.00112814	0.0803328	rDPI_16617	chr14	103522438	103522440	chr14:103522438..103522440,chr14:103522309..103522519,-;peak:chr14:103522438..103522439,-;peakCounts:2613.6	2913	-	103522438	ENST00000557287.1	ENSG00000166165.13	enhancer	ENSG00000166165	CKB
0.0290759	1.61043	14.0566	0.00113044	0.0804094	rDPI_47983	chr7	94509800	94509803	chr7:94509800..94509803,chr7:94509580..94509956,+;peak:chr7:94509801..94509802,+;peakCounts:442.6	1189	+	94509801	ENST00000297273.9	ENSG00000127995.17	alternative	ENSG00000127995	CASD1
0.0341364	2.864	14.0453	0.00113458	0.080614	rDPI_9676	chr11	68312601	68312616	chr11:68312601..68312616,chr11:68312416..68312713,+;peak:chr11:68312604..68312605,+;peakCounts:2082.2	6648	+	68312604	ENST00000294304.12	ENSG00000162337.12	alternative	ENSG00000162337	LRP5
0.0329863	2.43284	14.0344	0.00113855	0.080614	rDPI_24606	chr19	3359261	3359288	chr19:3359261..3359288,chr19:3359135..3359517,+;peak:chr19:3359276..3359277,+;peakCounts:749.7	5025	+	3359276	ENST00000589123.5	ENSG00000141905.19	enhancer	ENSG00000141905	NFIC
0.0292819	1.25317	14.0296	0.00114031	0.080614	rDPI_36089	chr3	15521705	15521715	chr3:15521705..15521715,chr3:15521632..15521830,-;peak:chr3:15521710..15521711,-;peakCounts:296.1	505	-	15521710	ENST00000383788.10	ENSG00000206561.14	alternative	ENSG00000206561	COLQ
0.0337734	2.27202	14.0274	0.00114113	0.080614	rDPI_20253	chr16	74666859	74666884	chr16:74666859..74666884,chr16:74666855..74666942,-;peak:chr16:74666867..74666868,-;peakCounts:168.3	1098	-	74666867	ENST00000361070.9	ENSG00000168411.14	promoter	ENSG00000168411	RFWD3
-0.0445311	1.46385	14.0251	0.00114198	0.080614	rDPI_27801	chr2	20637448	20637457	chr2:20637448..20637457,chr2:20637325..20637547,+;peak:chr2:20637452..20637453,+;peakCounts:43.5	479	+	20637452	ENST00000272224.5	ENSG00000143869.7	alternative	ENSG00000143869	GDF7
0.0308824	4.67783	14.0227	0.00114286	0.080614	rDPI_36417	chr3	39406719	39406722	chr3:39406719..39406722,chr3:39406687..39406759,+;peak:chr3:39406719..39406720,+;peakCounts:6325.2	12299	+	39406719	ENST00000487876.1	ENSG00000168028.14	promoter	ENSG00000168028	RPSA
-0.0370778	2.26594	14.0193	0.00114411	0.080614	rDPI_15000	chr14	23404313	23404322	chr14:23404313..23404322,chr14:23404297..23404393,-;peak:chr14:23404317..23404318,-;peakCounts:427.1	1028	-	23404317	ENST00000557461.2	ENSG00000197616.13	alternative	ENSG00000197616	MYH6
-0.0398515	7.36705	14.0126	0.00114657	0.080614	rDPI_821	chr1	23559500	23559502	chr1:23559500..23559502,chr1:23559211..23559551,-;peak:chr1:23559501..23559502,-;peakCounts:28591.8	56716	-	23559501	ENST00000374561.6	ENSG00000117318.9	promoter	ENSG00000117318	ID3
-0.0460413	2.33662	14.0103	0.00114743	0.080614	rDPI_45950	chr6	123548548	123548572	chr6:123548548..123548572,chr6:123548456..123548613,-;peak:chr6:123548553..123548554,-;peakCounts:833.4	2374	-	123548553	ENST00000422596.1	ENSG00000186439.14	alternative	ENSG00000186439	TRDN
0.0299966	2.72433	14.0101	0.0011475	0.080614	rDPI_47398	chr7	45000198	45000214	chr7:45000198..45000214,chr7:45000163..45000313,+;peak:chr7:45000210..45000211,+;peakCounts:1224	3560	+	45000210	ENST00000258781.11	ENSG00000136280.17	alternative	ENSG00000136280	CCM2
-0.0262974	1.48091	14.0095	0.00114771	0.080614	rDPI_24924	chr19	7920363	7920365	chr19:7920363..7920365,chr19:7920305..7920394,+;peak:chr19:7920364..7920365,+;peakCounts:502.1	614	+	7920364	ENST00000595637.1	ENSG00000104976.12	alternative	ENSG00000104976	SNAPC2
0.0357228	4.82596	14.0084	0.00114814	0.080614	rDPI_26406	chr19	41353922	41353923	chr19:41353922..41353923,chr19:41353861..41353993,-;peak:chr19:41353922..41353923,-;peakCounts:11748.6	13054	-	41353922	ENST00000221930.6	ENSG00000105329.11	promoter	ENSG00000105329	TGFB1
0.0388915	3.58241	14.0009	0.0011509	0.0807214	rDPI_29557	chr2	128318866	128318869	chr2:128318866..128318869,chr2:128318816..128318939,-;peak:chr2:128318868..128318869,-;peakCounts:8239.5	10416	-	128318868	ENST00000259241.7	ENSG00000136720.7	promoter	ENSG00000136720	HS6ST1
-0.030566	2.10415	13.9959	0.00115275	0.0807642	rDPI_1482	chr1	42035923	42035943	chr1:42035923..42035943,chr1:42035862..42035980,-;peak:chr1:42035934..42035935,-;peakCounts:340.3	1084	-	42035934	ENST00000489103.5	ENSG00000127124.16	promoter	ENSG00000127124	HIVEP3
0.0326551	3.80596	13.9925	0.00115401	0.080766	rDPI_32818	chr20	3786706	3786721	chr20:3786706..3786721,chr20:3786631..3786862,-;peak:chr20:3786716..3786717,-;peakCounts:2827.8	7732	-	3786716	ENST00000379751.5	ENSG00000125817.8	alternative	ENSG00000125817	CENPB
-0.0240007	2.86225	13.977	0.00115977	0.0809474	rDPI_22703	chr17	63827727	63827737	chr17:63827727..63827737,chr17:63827669..63827802,+;peak:chr17:63827732..63827733,+;peakCounts:1475.1	2730	+	63827732	ENST00000580265.1	ENSG00000087191.13	alternative	ENSG00000087191	PSMC5
0.0356393	3.47907	13.976	0.00116016	0.0809474	rDPI_24451	chr19	1407519	1407542	chr19:1407519..1407542,chr19:1407456..1407803,+;peak:chr19:1407532..1407533,+;peakCounts:1497.6	5662	+	1407532	ENST00000336761.10	ENSG00000071626.17	alternative	ENSG00000071626	DAZAP1
-0.0279576	1.72269	13.972	0.00116165	0.0809474	rDPI_18040	chr15	74782535	74782546	chr15:74782535..74782546,chr15:74782486..74782593,+;peak:chr15:74782540..74782541,+;peakCounts:234.9	711	+	74782540	ENST00000563894.1	ENSG00000103653.16	alternative	ENSG00000103653	CSK
0.0606709	4.31857	13.9704	0.00116227	0.0809474	rDPI_33536	chr20	44715369	44715371	chr20:44715369..44715371,chr20:44715283..44715423,+;peak:chr20:44715370..44715371,+;peakCounts:4125.6	8388	+	44715370	ENST00000190983.5	ENSG00000064205.11	promoter	ENSG00000064205	CCN5
-0.084344	1.74631	13.9685	0.00116297	0.0809474	rDPI_34111	chr21	8399927	8399941	chr21:8399927..8399941,chr21:8399926..8400025,+;peak:chr21:8399928..8399929,+;peakCounts:79.1	229	+	8399928	ENST00000613359.1	ENSG00000275215.1	alternative	ENSG00000275215	RNA5-8SN3
-0.0348056	4.56287	13.9631	0.00116499	0.0809474	rDPI_45441	chr6	73696179	73696204	chr6:73696179..73696204,chr6:73695978..73696254,+;peak:chr6:73696203..73696204,+;peakCounts:3203.1	7498	+	73696203	ENST00000287097.6	ENSG00000156535.15	promoter	ENSG00000156535	CD109
0.0262285	2.37061	13.9609	0.00116581	0.0809474	rDPI_36127	chr3	16884994	16885007	chr3:16884994..16885007,chr3:16884916..16885048,+;peak:chr3:16885002..16885003,+;peakCounts:963	2946	+	16885002	ENST00000615277.5	ENSG00000154822.18	alternative	ENSG00000154822	PLCL2
-0.0391046	2.03895	13.9572	0.00116719	0.0809474	rDPI_21792	chr17	39668014	39668021	chr17:39668014..39668021,chr17:39667791..39668043,+;peak:chr17:39668020..39668021,+;peakCounts:563.4	943	+	39668020	ENST00000394246.1	ENSG00000141744.4	alternative	ENSG00000141744	PNMT
0.0312837	3.48224	13.9537	0.00116854	0.0809474	rDPI_48728	chr7	129952941	129952948	chr7:129952941..129952948,chr7:129952515..129953011,-;peak:chr7:129952944..129952945,-;peakCounts:5465.2	8344	-	129952944	ENST00000472396.5	ENSG00000186591.13	alternative	ENSG00000186591	UBE2H
0.0340481	3.62895	13.9525	0.001169	0.0809474	rDPI_21540	chr17	31094972	31094978	chr17:31094972..31094978,chr17:31094867..31095004,+;peak:chr17:31094977..31094978,+;peakCounts:7469.1	8925	+	31094977	ENST00000431387.8	ENSG00000196712.18	promoter	ENSG00000196712	NF1
0.032178	6.49373	13.9476	0.00117084	0.08095	rDPI_33833	chr20	58891573	58891581	chr20:58891573..58891581,chr20:58891179..58891857,+;peak:chr20:58891580..58891581,+;peakCounts:33067.4	72384	+	58891580	ENST00000371081.5	ENSG00000087460.28	alternative	ENSG00000087460	GNAS
0.0395484	2.31285	13.9313	0.001177	0.08095	rDPI_29208	chr2	98822884	98822908	chr2:98822884..98822908,chr2:98822841..98823016,-;peak:chr2:98822892..98822893,-;peakCounts:436.5	2235	-	98822892	ENST00000464413.1	ENSG00000196872.12	enhancer	ENSG00000196872	CRACDL
-0.0301225	4.52192	13.9307	0.00117722	0.08095	rDPI_38197	chr3	142448012	142448025	chr3:142448012..142448025,chr3:142447881..142448108,-;peak:chr3:142448019..142448020,-;peakCounts:4893.3	12730	-	142448019	ENST00000486211.1	ENSG00000114127.11	promoter	ENSG00000114127	XRN1
-0.0422371	2.43047	13.9281	0.00117822	0.08095	rDPI_19271	chr16	23141229	23141240	chr16:23141229..23141240,chr16:23141155..23141284,-;peak:chr16:23141234..23141235,-;peakCounts:518.4	869	-	23141234	ENST00000219689.11	ENSG00000103404.14	not_classified	ENSG00000103404	USP31
0.0288529	1.71564	13.9245	0.0011796	0.08095	rDPI_24079	chr18	54224593	54224598	chr18:54224593..54224598,chr18:54224287..54224730,-;peak:chr18:54224594..54224595,-;peakCounts:170.8	946	-	54224594	ENST00000583046.1	ENSG00000134046.12	alternative	ENSG00000134046	MBD2
-0.0369383	3.41729	13.9229	0.00118018	0.08095	rDPI_38273	chr3	150408280	150408308	chr3:150408280..150408308,chr3:150408215..150408456,+;peak:chr3:150408298..150408299,+;peakCounts:2389.5	5238	+	150408298	ENST00000361875.7	ENSG00000196428.12	promoter	ENSG00000196428	TSC22D2
0.0355642	1.07603	13.9229	0.0011802	0.08095	rDPI_15075	chr14	23415750	23415761	chr14:23415750..23415761,chr14:23415636..23415836,-;peak:chr14:23415755..23415756,-;peakCounts:1483.9	4775	-	23415755	ENST00000401172.1	ENSG00000215991.1	alternative	ENSG00000215991	MIR208B
-0.0349318	3.15137	13.92	0.00118128	0.08095	rDPI_21148	chr17	10036716	10036729	chr17:10036716..10036729,chr17:10036451..10036881,-;peak:chr17:10036723..10036724,-;peakCounts:1492.8	2535	-	10036723	ENST00000579140.5	ENSG00000007237.19	alternative	ENSG00000007237	GAS7
0.042709	7.89474	13.9193	0.00118158	0.08095	rDPI_7993	chr11	2377313	2377315	chr11:2377313..2377315,chr11:2377305..2377372,+;peak:chr11:2377314..2377315,+;peakCounts:205334.1	246231	+	2377314	ENST00000263645.10	ENSG00000110651.12	promoter	ENSG00000110651	CD81
-0.0304259	1.53339	13.919	0.00118167	0.08095	rDPI_31613	chr2	190181024	190181035	chr2:190181024..190181035,chr2:190180614..190181095,+;peak:chr2:190181029..190181030,+;peakCounts:128.3	649	+	190181029	ENST00000443551.2	ENSG00000187699.10	alternative	ENSG00000187699	C2orf88
-0.0252565	1.42279	13.9146	0.00118335	0.08095	rDPI_24582	chr19	3054153	3054166	chr19:3054153..3054166,chr19:3054134..3054197,-;peak:chr19:3054160..3054161,-;peakCounts:288	536	-	3054160	ENST00000590067.5	ENSG00000104964.15	alternative	ENSG00000104964	TLE5
0.0183338	4.83045	13.91	0.00118511	0.08095	rDPI_38033	chr3	133573659	133573699	chr3:133573659..133573699,chr3:133573548..133574281,+;peak:chr3:133573664..133573665,+;peakCounts:6407	26672	+	133573664	ENST00000264993.8	ENSG00000091527.16	promoter	ENSG00000091527	CDV3
0.0318107	4.85667	13.9099	0.00118515	0.08095	rDPI_45113	chr6	43171434	43171497	chr6:43171434..43171497,chr6:43171238..43171601,+;peak:chr6:43171443..43171444,+;peakCounts:3095.1	25864	+	43171443	ENST00000265354.6	ENSG00000112658.8	alternative	ENSG00000112658	SRF
-0.0264818	6.38008	13.8931	0.0011916	0.0813049	rDPI_39198	chr4	6640685	6640688	chr4:6640685..6640688,chr4:6640637..6641253,+;peak:chr4:6640685..6640686,+;peakCounts:29709.9	44053	+	6640685	ENST00000382581.5	ENSG00000179010.15	promoter	ENSG00000179010	MRFAP1
0.0718221	2.91003	13.8857	0.00119447	0.0814011	rDPI_52434	chr9	115118154	115118157	chr9:115118154..115118157,chr9:115118142..115118273,-;peak:chr9:115118155..115118156,-;peakCounts:853.2	4073	-	115118155	ENST00000350763.9	ENSG00000041982.16	promoter	ENSG00000041982	TNC
0.0263766	4.71802	13.8825	0.0011957	0.0814011	rDPI_42983	chr5	140175169	140175192	chr5:140175169..140175192,chr5:140174974..140175283,+;peak:chr5:140175177..140175178,+;peakCounts:5361.3	25698	+	140175177	ENST00000261811.6	ENSG00000120306.11	promoter	ENSG00000120306	CYSTM1
-0.0310091	2.70519	13.877	0.00119782	0.0814011	rDPI_4621	chr1	207911252	207911263	chr1:207911252..207911263,chr1:207911014..207911404,-;peak:chr1:207911257..207911258,-;peakCounts:401.4	1645	-	207911257	ENST00000310833.12	ENSG00000174059.17	alternative	ENSG00000174059	CD34
-0.030777	1.91538	13.8749	0.00119865	0.0814011	rDPI_20213	chr16	71884172	71884185	chr16:71884172..71884185,chr16:71884028..71884192,-;peak:chr16:71884180..71884181,-;peakCounts:270.9	731	-	71884180	ENST00000568961.5	ENSG00000102984.15	promoter	ENSG00000102984	ZNF821
-0.0300751	3.56745	13.8713	0.00120003	0.0814011	rDPI_53542	chrM	16146	16164	chrM:16146..16164,chrM:15951..16531,+;peak:chrM:16154..16155,+;peakCounts:909.3	3320	+	16154	ENST00000387460.2	ENSG00000210195.2	alternative	ENSG00000210195	NA
-0.032313	2.14651	13.8701	0.00120048	0.0814011	rDPI_4591	chr1	207050985	207050994	chr1:207050985..207050994,chr1:207050937..207051042,-;peak:chr1:207050989..207050990,-;peakCounts:675	1646	-	207050989	ENST00000315927.9	ENSG00000180667.11	promoter	ENSG00000180667	YOD1
0.0277272	1.4157	13.8592	0.00120474	0.0814802	rDPI_24260	chr18	75209360	75209371	chr18:75209360..75209371,chr18:75209047..75209451,-;peak:chr18:75209365..75209366,-;peakCounts:437	846	-	75209365	ENST00000322342.4	ENSG00000180011.7	alternative	ENSG00000180011	ZADH2
0.0319868	2.03689	13.8585	0.00120499	0.0814802	rDPI_19982	chr16	66696727	66696749	chr16:66696727..66696749,chr16:66696665..66696818,-;peak:chr16:66696732..66696733,-;peakCounts:372.6	1730	-	66696732	ENST00000394106.7	ENSG00000183723.13	promoter	ENSG00000183723	CMTM4
0.0404496	4.70161	13.8571	0.00120554	0.0814802	rDPI_42828	chr5	136028987	136028990	chr5:136028987..136028990,chr5:136028933..136029082,+;peak:chr5:136028988..136028989,+;peakCounts:9953.1	14816	+	136028988	ENST00000504185.5	ENSG00000120708.17	promoter	ENSG00000120708	TGFBI
-0.0327712	3.98162	13.847	0.00120948	0.0814802	rDPI_7672	chr10	124801814	124801821	chr10:124801814..124801821,chr10:124801775..124801862,+;peak:chr10:124801819..124801820,+;peakCounts:4603.5	7953	+	124801819	ENST00000298492.6	ENSG00000165660.8	promoter	ENSG00000165660	ABRAXAS2
-0.0314905	1.41573	13.8443	0.00121054	0.0814802	rDPI_45687	chr6	108004888	108004901	chr6:108004888..108004901,chr6:108004888..108004944,-;peak:chr6:108004894..108004895,-;peakCounts:197.1	384	-	108004894	ENST00000417878.1	ENSG00000225093.1	enhancer	ENSG00000225093	RPL3P7
-0.0256557	3.91994	13.8387	0.00121277	0.0814802	rDPI_51875	chr9	83956738	83956743	chr9:83956738..83956743,chr9:83956656..83956783,-;peak:chr9:83956742..83956743,-;peakCounts:5649.3	7922	-	83956742	ENST00000376344.8	ENSG00000165118.15	promoter	ENSG00000165118	C9orf64
0.0488239	3.66659	13.8383	0.00121292	0.0814802	rDPI_7145	chr10	100999810	100999835	chr10:100999810..100999835,chr10:100999716..100999949,+;peak:chr10:100999829..100999830,+;peakCounts:1782	7232	+	100999829	ENST00000454422.1	ENSG00000107816.17	promoter	ENSG00000107816	LZTS2
-0.0584088	4.02593	13.8346	0.00121436	0.0814802	rDPI_14817	chr14	23384480	23384499	chr14:23384480..23384499,chr14:23384216..23384714,-;peak:chr14:23384484..23384485,-;peakCounts:967.4	6452	-	23384484	ENST00000651452.1	ENSG00000197616.13	alternative	ENSG00000197616	MYH6
0.0336845	1.38231	13.8342	0.00121451	0.0814802	rDPI_7309	chr10	103855726	103855736	chr10:103855726..103855736,chr10:103855681..103855786,-;peak:chr10:103855729..103855730,-;peakCounts:445.4	1220	-	103855729	ENST00000369774.8	ENSG00000107957.16	alternative	ENSG00000107957	SH3PXD2A
0.0309566	4.40957	13.8327	0.00121511	0.0814802	rDPI_3040	chr1	150579609	150579611	chr1:150579609..150579611,chr1:150579242..150579676,-;peak:chr1:150579610..150579611,-;peakCounts:13108.5	15817	-	150579610	ENST00000678770.1	ENSG00000143384.14	alternative	ENSG00000143384	MCL1
0.0554329	2.80998	13.832	0.00121538	0.0814802	rDPI_16105	chr14	74612193	74612214	chr14:74612193..74612214,chr14:74612103..74612538,-;peak:chr14:74612200..74612201,-;peakCounts:2218.1	4465	-	74612200	ENST00000261978.9	ENSG00000119681.12	alternative	ENSG00000119681	LTBP2
0.0465	2.36794	13.828	0.00121694	0.0815015	rDPI_26761	chr19	46860910	46860921	chr19:46860910..46860921,chr19:46860834..46860939,+;peak:chr19:46860911..46860912,+;peakCounts:2488.5	5052	+	46860911	ENST00000672722.1	ENSG00000160007.19	alternative	ENSG00000160007	ARHGAP35
-0.0278157	1.15743	13.8193	0.00122038	0.0815109	rDPI_12340	chr12	64695204	64695210	chr12:64695204..64695210,chr12:64695203..64695620,+;peak:chr12:64695204..64695205,+;peakCounts:297.9	435	+	64695204	ENST00000623975.1	ENSG00000280181.1	enhancer	ENSG00000280181	NA
0.0298415	2.46432	13.818	0.00122089	0.0815109	rDPI_13158	chr12	111405920	111405928	chr12:111405920..111405928,chr12:111405847..111405990,+;peak:chr12:111405923..111405924,+;peakCounts:3447.9	5221	+	111405923	ENST00000341259.7	ENSG00000111252.11	promoter	ENSG00000111252	SH2B3
-0.0337622	1.93062	13.8162	0.00122162	0.0815109	rDPI_43772	chr5	179806384	179806399	chr5:179806384..179806399,chr5:179806354..179806449,+;peak:chr5:179806393..179806394,+;peakCounts:355.5	1146	+	179806393	ENST00000506042.5	ENSG00000161011.20	promoter	ENSG00000161011	SQSTM1
0.0287206	3.40556	13.8145	0.00122229	0.0815109	rDPI_41537	chr5	36241893	36241898	chr5:36241893..36241898,chr5:36241840..36241992,-;peak:chr5:36241893..36241894,-;peakCounts:8548.2	10133	-	36241893	ENST00000381937.9	ENSG00000152620.13	promoter	ENSG00000152620	NADK2
0.0331083	1.60561	13.8106	0.00122385	0.0815109	rDPI_7510	chr10	114684458	114684471	chr10:114684458..114684471,chr10:114684344..114684684,-;peak:chr10:114684463..114684464,-;peakCounts:366.9	1655	-	114684463	ENST00000392955.7	ENSG00000099204.20	alternative	ENSG00000099204	ABLIM1
-0.0301885	2.32624	13.8064	0.00122551	0.0815109	rDPI_44135	chr6	14431961	14431970	chr6:14431961..14431970,chr6:14431851..14432028,+;peak:chr6:14431965..14431966,+;peakCounts:824.4	1142	+	14431965	ENST00000666857.1	ENSG00000286277.1	enhancer	ENSG00000286277	NA
0.0267134	3.68365	13.8056	0.00122582	0.0815109	rDPI_44243	chr6	24720835	24720842	chr6:24720835..24720842,chr6:24720798..24720930,-;peak:chr6:24720836..24720837,-;peakCounts:3086.1	4658	-	24720836	ENST00000378102.3	ENSG00000112308.13	alternative	ENSG00000112308	C6orf62
0.0366961	4.11698	13.8008	0.00122774	0.0815553	rDPI_24590	chr19	3062399	3062406	chr19:3062399..3062406,chr19:3062179..3062667,-;peak:chr19:3062402..3062403,-;peakCounts:1640.4	5823	-	3062402	ENST00000585557.1	ENSG00000104964.15	alternative	ENSG00000104964	TLE5
-0.0219543	1.62347	13.7899	0.00123209	0.0816911	rDPI_21850	chr17	40318277	40318280	chr17:40318277..40318280,chr17:40318174..40318302,+;peak:chr17:40318279..40318280,+;peakCounts:47.6	584	+	40318279	ENST00000394089.6	ENSG00000131759.18	alternative	ENSG00000131759	RARA
0.0362137	3.54548	13.7894	0.00123228	0.0816911	rDPI_39357	chr4	24913016	24913051	chr4:24913016..24913051,chr4:24912861..24913204,-;peak:chr4:24913030..24913031,-;peakCounts:746.1	4715	-	24913030	ENST00000635206.2	ENSG00000181982.19	promoter	ENSG00000181982	CCDC149
0.0322311	1.5361	13.7791	0.00123641	0.0818814	rDPI_20396	chr16	85169211	85169215	chr16:85169211..85169215,chr16:85169182..85169239,+;peak:chr16:85169211..85169212,+;peakCounts:753.3	995	+	85169211	ENST00000637419.1	ENSG00000131149.19	ambiguous	ENSG00000131149	GSE1
0.034933	2.03263	13.7663	0.00124153	0.0821375	rDPI_34526	chr21	43865124	43865135	chr21:43865124..43865135,chr21:43865061..43865319,+;peak:chr21:43865130..43865131,+;peakCounts:456	1933	+	43865130	ENST00000291572.13	ENSG00000160216.21	alternative	ENSG00000160216	AGPAT3
0.042238	4.34831	13.7614	0.0012435	0.0821843	rDPI_39229	chr4	7043367	7043404	chr4:7043367..7043404,chr4:7043268..7043599,+;peak:chr4:7043390..7043391,+;peakCounts:1845.9	13306	+	7043390	ENST00000310074.8	ENSG00000173011.12	promoter	ENSG00000173011	TADA2B
0.035287	2.81249	13.7462	0.00124966	0.0825079	rDPI_10668	chr11	128522388	128522399	chr11:128522388..128522399,chr11:128522187..128522452,-;peak:chr11:128522393..128522394,-;peakCounts:3470.2	5031	-	128522393	ENST00000535549.5	ENSG00000134954.14	alternative	ENSG00000134954	ETS1
0.0312939	3.30487	13.7301	0.00125621	0.0828567	rDPI_3698	chr1	161685234	161685266	chr1:161685234..161685266,-	3476	-	161685236	ENST00000426558.1	ENSG00000213075.7	promoter	ENSG00000213075	RPL31P11
-0.0468022	3.70199	13.7256	0.00125804	0.0828935	rDPI_14863	chr14	23388906	23388920	chr14:23388906..23388920,chr14:23388855..23389061,-;peak:chr14:23388911..23388912,-;peakCounts:1115.6	4255	-	23388911	ENST00000362287.2	ENSG00000199157.2	alternative	ENSG00000199157	MIR208A
0.0358841	1.95408	13.7073	0.00126556	0.0833048	rDPI_41045	chr4	176792511	176792513	chr4:176792511..176792513,chr4:176792409..176792556,-;peak:chr4:176792511..176792512,-;peakCounts:1728.9	1961	-	176792511	ENST00000618562.2	ENSG00000150630.4	promoter	ENSG00000150630	VEGFC
-0.0407348	3.21773	13.7003	0.00126841	0.0834084	rDPI_32429	chr2	231461747	231461759	chr2:231461747..231461759,chr2:231461544..231462022,-;peak:chr2:231461752..231461753,-;peakCounts:1349.1	2966	-	231461752	ENST00000677703.1	ENSG00000115053.17	alternative	ENSG00000115053	NCL
0.0366807	1.76309	13.6956	0.00127036	0.0834528	rDPI_24748	chr19	4559672	4559690	chr19:4559672..4559690,chr19:4559624..4559832,-;peak:chr19:4559684..4559685,-;peakCounts:426.6	895	-	4559684	ENST00000586582.6	ENSG00000167680.17	alternative	ENSG00000167680	SEMA6B
-0.0314711	1.0885	13.6742	0.00127922	0.0838454	rDPI_10911	chr12	6270343	6270346	chr12:6270343..6270346,-	581	-	6270345	ENST00000537967.1	ENSG00000256103.2	promoter	ENSG00000256103	NA
-0.0270939	1.83495	13.6742	0.00127925	0.0838454	rDPI_24964	chr19	8832239	8832255	chr19:8832239..8832255,chr19:8832206..8832329,-;peak:chr19:8832246..8832247,-;peakCounts:120.5	735	-	8832246	ENST00000593891.1	ENSG00000167785.9	alternative	ENSG00000167785	ZNF558
-0.035583	2.73503	13.6719	0.00128019	0.0838454	rDPI_686	chr1	19882390	19882406	chr1:19882390..19882406,chr1:19882357..19882468,+;peak:chr1:19882400..19882401,+;peakCounts:1121.4	2446	+	19882400	ENST00000375120.4	ENSG00000169914.6	promoter	ENSG00000169914	OTUD3
0.0404008	1.73126	13.6568	0.00128649	0.0841556	rDPI_16104	chr14	74612180	74612189	chr14:74612180..74612189,chr14:74612103..74612538,-;peak:chr14:74612180..74612181,-;peakCounts:201.1	1582	-	74612180	ENST00000557425.1	ENSG00000119681.12	alternative	ENSG00000119681	LTBP2
-0.0733462	3.18551	13.6544	0.0012875	0.0841556	rDPI_29623	chr2	134441524	134441532	chr2:134441524..134441532,chr2:134441416..134441627,+;peak:chr2:134441527..134441528,+;peakCounts:619.2	1318	+	134441527	ENST00000281923.4	ENSG00000152127.9	enhancer	ENSG00000152127	MGAT5
-0.0228771	7.15173	13.648	0.00129019	0.084189	rDPI_12600	chr12	91179544	91179553	chr12:91179544..91179553,chr12:91179325..91179635,-;peak:chr12:91179549..91179550,-;peakCounts:18625.9	52538	-	91179549	ENST00000551354.1	ENSG00000011465.18	alternative	ENSG00000011465	DCN
0.038245	2.25707	13.6459	0.00129106	0.084189	rDPI_20261	chr16	74999054	74999065	chr16:74999054..74999065,chr16:74998949..74999154,+;peak:chr16:74999060..74999061,+;peakCounts:1492.2	3590	+	74999060	ENST00000320619.10	ENSG00000186187.12	promoter	ENSG00000186187	ZNRF1
0.0272415	2.35693	13.644	0.00129188	0.084189	rDPI_24839	chr19	6424786	6424787	chr19:6424786..6424787,chr19:6424727..6424854,-;peak:chr19:6424786..6424787,-;peakCounts:1393	2310	-	6424786	ENST00000398148.7	ENSG00000088247.18	alternative	ENSG00000088247	KHSRP
0.0350507	2.56619	13.6274	0.00129886	0.0845261	rDPI_5948	chr10	34815306	34815315	chr10:34815306..34815315,chr10:34815180..34815344,-;peak:chr10:34815309..34815310,-;peakCounts:1410.2	3122	-	34815309	ENST00000340077.9	ENSG00000148498.16	alternative	ENSG00000148498	PARD3
0.0532744	3.91497	13.6256	0.00129964	0.0845261	rDPI_38869	chr3	194486807	194486816	chr3:194486807..194486816,chr3:194486780..194487059,-;peak:chr3:194486807..194486808,-;peakCounts:4050.7	7068	-	194486807	ENST00000645319.2	ENSG00000133657.16	enhancer	ENSG00000133657	ATP13A3
-0.0344804	2.46028	13.6142	0.00130446	0.0846916	rDPI_53540	chrM	16102	16121	chrM:16102..16121,chrM:15951..16531,+;peak:chrM:16107..16108,+;peakCounts:198.3	1745	+	16107	ENST00000387460.2	ENSG00000210195.2	alternative	ENSG00000210195	NA
0.041836	4.23209	13.6135	0.00130478	0.0846916	rDPI_29336	chr2	105744902	105744922	chr2:105744902..105744922,chr2:105744842..105745132,+;peak:chr2:105744912..105744913,+;peakCounts:3383.1	8287	+	105744912	ENST00000233154.9	ENSG00000071051.14	promoter	ENSG00000071051	NCK2
-0.0358574	3.98088	13.6087	0.00130681	0.084693	rDPI_9853	chr11	74746194	74746195	chr11:74746194..74746195,-	15285	-	74746194	ENST00000428553.1	ENSG00000227615.1	promoter	ENSG00000227615	NA
-0.0274883	2.12787	13.6073	0.0013074	0.084693	rDPI_26096	chr19	37078442	37078453	chr19:37078442..37078453,chr19:37078408..37078496,+;peak:chr19:37078449..37078450,+;peakCounts:306.9	1495	+	37078449	ENST00000589245.5	ENSG00000197050.11	promoter	ENSG00000197050	ZNF420
0.0454009	4.61228	13.6017	0.00130982	0.0847533	rDPI_52974	chr9	131740004	131740043	chr9:131740004..131740043,chr9:131739907..131740137,-;peak:chr9:131740017..131740018,-;peakCounts:1836.9	14996	-	131740017	ENST00000372195.5	ENSG00000107263.18	promoter	ENSG00000107263	RAPGEF1
-0.0365848	4.48861	13.5991	0.00131093	0.0847533	rDPI_15012	chr14	23405276	23405300	chr14:23405276..23405300,chr14:23405226..23405397,-;peak:chr14:23405283..23405284,-;peakCounts:1453.9	5536	-	23405283	ENST00000557461.2	ENSG00000197616.13	alternative	ENSG00000197616	MYH6
0.0366382	3.04987	13.5883	0.00131556	0.0849036	rDPI_24481	chr19	1592825	1592849	chr19:1592825..1592849,chr19:1592623..1592934,-;peak:chr19:1592835..1592836,-;peakCounts:1069.3	3961	-	1592835	ENST00000434436.8	ENSG00000071655.18	alternative	ENSG00000071655	MBD3
0.0418131	1.67854	13.5876	0.00131585	0.0849036	rDPI_43544	chr5	170297727	170297736	chr5:170297727..170297736,chr5:170297715..170297881,-;peak:chr5:170297729..170297730,-;peakCounts:509.5	1284	-	170297729	ENST00000519594.5	ENSG00000043462.13	alternative	ENSG00000043462	LCP2
0.0288973	3.00244	13.5755	0.00132102	0.0851448	rDPI_24869	chr19	7294299	7294320	chr19:7294299..7294320,chr19:7294181..7294472,-;peak:chr19:7294308..7294309,-;peakCounts:2577.6	7589	-	7294308	ENST00000302850.10	ENSG00000171105.14	enhancer	ENSG00000171105	INSR
0.0375038	4.50598	13.5728	0.0013222	0.0851448	rDPI_46283	chr6	148342831	148342860	chr6:148342831..148342860,chr6:148342694..148342889,+;peak:chr6:148342838..148342839,+;peakCounts:3448.8	13745	+	148342838	ENST00000367467.8	ENSG00000111961.18	promoter	ENSG00000111961	SASH1
0.0307663	1.43641	13.5647	0.00132571	0.0852868	rDPI_19990	chr16	66911243	66911248	chr16:66911243..66911248,-	364	-	66911243	ENST00000567009.5	ENSG00000166589.13	enhancer	ENSG00000166589	CDH16
-0.0268846	1.1254	13.56	0.00132776	0.0853349	rDPI_40462	chr4	119150940	119150951	chr4:119150940..119150951,chr4:119150872..119151039,+;peak:chr4:119150945..119150946,+;peakCounts:170.4	368	+	119150945	ENST00000307128.6	ENSG00000172399.6	alternative	ENSG00000172399	MYOZ2
0.0308603	2.5839	13.5545	0.00133015	0.0854042	rDPI_9579	chr11	67266427	67266431	chr11:67266427..67266431,chr11:67266347..67266504,+;peak:chr11:67266429..67266430,+;peakCounts:242.4	2205	+	67266429	ENST00000308595.10	ENSG00000173020.11	alternative	ENSG00000173020	GRK2
0.0385183	2.4533	13.5461	0.0013338	0.0854751	rDPI_24500	chr19	1941171	1941179	chr19:1941171..1941179,chr19:1941093..1941253,+;peak:chr19:1941176..1941177,+;peakCounts:1267.9	3042	+	1941176	ENST00000255641.13	ENSG00000133275.16	alternative	ENSG00000133275	CSNK1G2
0.0348573	2.72298	13.5411	0.00133597	0.0854751	rDPI_7099	chr10	99620426	99620443	chr10:99620426..99620443,chr10:99620336..99620501,-;peak:chr10:99620439..99620440,-;peakCounts:1084	3142	-	99620439	ENST00000370495.6	ENSG00000155287.11	promoter	ENSG00000155287	SLC25A28
-0.0322961	1.70335	13.5401	0.00133642	0.0854751	rDPI_5398	chr1	246566452	246566464	chr1:246566452..246566464,chr1:246566304..246566610,+;peak:chr1:246566458..246566459,+;peakCounts:288	868	+	246566458	ENST00000366513.9	ENSG00000162852.14	alternative	ENSG00000162852	CNST
-0.0261026	1.14577	13.7267	0.00133649	0.0854751	rDPI_35141	chr22	32860900	32860904	chr22:32860900..32860904,chr22:32859162..32860917,+;peak:chr22:32860903..32860904,+;peakCounts:20.3	224	+	32860903	ENST00000266085.7	ENSG00000100234.12	alternative	ENSG00000100234	TIMP3
-0.0291986	4.97383	13.5283	0.00134155	0.0857148	rDPI_38629	chr3	180989749	180989758	chr3:180989749..180989758,chr3:180989627..180989848,-;peak:chr3:180989751..180989752,-;peakCounts:5311.6	16969	-	180989751	ENST00000482363.1	ENSG00000205981.8	alternative	ENSG00000205981	DNAJC19
-0.0372296	1.30986	13.5246	0.00134319	0.0857357	rDPI_26828	chr19	47781366	47781376	chr19:47781366..47781376,+	868	+	47781367	ENST00000599627.1	ENSG00000178980.15	alternative	ENSG00000178980	SELENOW
-0.0222695	6.47046	13.5188	0.00134574	0.0858143	rDPI_21576	chr17	32350153	32350176	chr17:32350153..32350176,chr17:32350110..32350231,+;peak:chr17:32350157..32350158,+;peakCounts:15120	51392	+	32350157	ENST00000394670.9	ENSG00000010244.19	promoter	ENSG00000010244	ZNF207
-0.0357778	2.88211	13.5135	0.00134809	0.0858803	rDPI_21147	chr17	10036677	10036693	chr17:10036677..10036693,chr17:10036451..10036881,-;peak:chr17:10036687..10036688,-;peakCounts:949.8	2504	-	10036687	ENST00000579140.5	ENSG00000007237.19	alternative	ENSG00000007237	GAS7
-0.0334162	1.9482	13.5033	0.00135256	0.086034	rDPI_20896	chr17	7043917	7043923	chr17:7043917..7043923,chr17:7043909..7043986,-;peak:chr17:7043917..7043918,-;peakCounts:441	540	-	7043917	ENST00000308009.5	ENSG00000174326.14	promoter	ENSG00000174326	SLC16A11
0.0234695	1.4604	13.5004	0.00135388	0.086034	rDPI_16683	chr14	104795777	104795779	chr14:104795777..104795779,chr14:104795628..104795812,-;peak:chr14:104795778..104795779,-;peakCounts:536.8	974	-	104795778	ENST00000349310.7	ENSG00000142208.17	alternative	ENSG00000142208	AKT1
-0.0491873	4.96006	13.4939	0.00135674	0.086034	rDPI_17728	chr15	64151728	64151735	chr15:64151728..64151735,chr15:64151626..64151800,+;peak:chr15:64151731..64151732,+;peakCounts:4917.6	6754	+	64151731	ENST00000325881.9	ENSG00000157734.14	alternative	ENSG00000157734	SNX22
0.0511507	2.57696	13.4868	0.00135991	0.086034	rDPI_16862	chr15	26773083	26773087	chr15:26773083..26773087,chr15:26772997..26773152,-;peak:chr15:26773086..26773087,-;peakCounts:422.8	746	-	26773086	ENST00000622697.4	ENSG00000166206.15	alternative	ENSG00000166206	GABRB3
0.0230814	2.66626	13.4839	0.00136118	0.086034	rDPI_53842	chrX	40580931	40580935	chrX:40580931..40580935,chrX:40580884..40581045,+;peak:chrX:40580931..40580932,+;peakCounts:1069.5	3220	+	40580931	ENST00000637526.1	ENSG00000182220.15	alternative	ENSG00000182220	ATP6AP2
-0.0346993	2.90081	13.4831	0.00136155	0.086034	rDPI_4620	chr1	207911184	207911195	chr1:207911184..207911195,chr1:207911014..207911404,-;peak:chr1:207911189..207911190,-;peakCounts:146.4	1734	-	207911189	ENST00000310833.12	ENSG00000174059.17	alternative	ENSG00000174059	CD34
0.0369517	3.31947	13.4821	0.00136199	0.086034	rDPI_8925	chr11	59615679	59615694	chr11:59615679..59615694,chr11:59615668..59615906,-;peak:chr11:59615687..59615688,-;peakCounts:2569	7238	-	59615687	ENST00000263847.6	ENSG00000110048.12	promoter	ENSG00000110048	OSBP
-0.049429	2.13073	13.4749	0.00136523	0.086034	rDPI_14963	chr14	23400373	23400391	chr14:23400373..23400391,chr14:23400243..23400426,-;peak:chr14:23400386..23400387,-;peakCounts:343.5	1268	-	23400386	ENST00000557461.2	ENSG00000197616.13	alternative	ENSG00000197616	MYH6
0.0256454	3.573	13.4748	0.00136525	0.086034	rDPI_25411	chr19	14433333	14433339	chr19:14433333..14433339,chr19:14433275..14433526,+;peak:chr19:14433336..14433337,+;peakCounts:2450.7	9323	+	14433336	ENST00000585839.5	ENSG00000123143.13	alternative	ENSG00000123143	PKN1
-0.0294352	6.66887	13.4713	0.00136681	0.086034	rDPI_16457	chr14	95535042	95535056	chr14:95535042..95535056,chr14:95534969..95535280,+;peak:chr14:95535050..95535051,+;peakCounts:36880.2	57505	+	95535050	ENST00000331334.5	ENSG00000182512.5	promoter	ENSG00000182512	GLRX5
0.0555064	7.73173	13.4696	0.0013676	0.086034	rDPI_18159	chr15	78264457	78264904	chr15:78264457..78264904,chr15:78264457..78264904,+	123195	+	78264562	ENST00000440911.6	ENSG00000140403.12	promoter	ENSG00000140403	DNAJA4
-0.065064	1.79903	13.4695	0.00136762	0.086034	rDPI_44406	chr6	29681147	29681158	chr6:29681147..29681158,chr6:29681081..29681182,-;peak:chr6:29681152..29681153,-;peakCounts:609.7	1110	-	29681152	ENST00000376883.2	ENSG00000204644.10	alternative	ENSG00000204644	ZFP57
0.0400648	2.54059	13.4678	0.00136839	0.086034	rDPI_16692	chr14	105168759	105168777	chr14:105168759..105168777,chr14:105168659..105168789,-;peak:chr14:105168770..105168771,-;peakCounts:1420.8	3537	-	105168770	ENST00000331782.8	ENSG00000184916.9	promoter	ENSG00000184916	JAG2
0.0294106	6.34879	13.4656	0.00136937	0.086034	rDPI_33206	chr20	33993726	33993785	chr20:33993726..33993785,chr20:33993609..33994128,+;peak:chr20:33993769..33993770,+;peakCounts:6397.8	54436	+	33993769	ENST00000413297.5	ENSG00000125970.12	promoter	ENSG00000125970	RALY
-0.0309503	3.09233	13.4608	0.00137152	0.086034	rDPI_3526	chr1	157045738	157045747	chr1:157045738..157045747,chr1:157045624..157045911,-;peak:chr1:157045742..157045743,-;peakCounts:1872	2573	-	157045742	ENST00000368194.8	ENSG00000132694.19	alternative	ENSG00000132694	ARHGEF11
-0.0401937	6.18006	13.4607	0.00137158	0.086034	rDPI_53524	chrM	14668	14674	chrM:14668..14674,chrM:12378..16083,-;peak:chrM:14673..14674,-;peakCounts:26792.1	32475	-	14673	ENST00000361681.2	ENSG00000198695.2	promoter	ENSG00000198695	ND6
0.125598	5.91845	13.4541	0.00137453	0.0861363	rDPI_19834	chr16	56638668	56638670	chr16:56638668..56638670,chr16:56638605..56638692,+;peak:chr16:56638669..56638670,+;peakCounts:22417.2	26032	+	56638669	ENST00000290705.12	ENSG00000205362.11	promoter	ENSG00000205362	MT1A
-0.0368172	8.27155	13.4508	0.00137601	0.0861466	rDPI_12489	chr12	76084680	76084687	chr12:76084680..76084687,chr12:76084570..76084823,-;peak:chr12:76084685..76084686,-;peakCounts:71786.7	98857	-	76084685	ENST00000618691.5	ENSG00000187109.15	promoter	ENSG00000187109	NAP1L1
0.0678804	2.23007	13.4419	0.00138006	0.0863174	rDPI_46132	chr6	137867257	137867262	chr6:137867257..137867262,chr6:137867174..137867410,+;peak:chr6:137867259..137867260,+;peakCounts:11070	19306	+	137867259	ENST00000612899.5	ENSG00000118503.15	promoter	ENSG00000118503	TNFAIP3
-0.0487355	2.25545	13.4275	0.00138657	0.0866417	rDPI_27140	chr19	52143003	52143014	chr19:52143003..52143014,chr19:52142971..52143042,+;peak:chr19:52143008..52143009,+;peakCounts:974.7	1729	+	52143008	ENST00000492641.1	ENSG00000243680.1	promoter	ENSG00000243680	NA
0.0248188	2.48525	13.4192	0.00139034	0.0867477	rDPI_38391	chr3	158644603	158644605	chr3:158644603..158644605,chr3:158644492..158644705,+;peak:chr3:158644604..158644605,+;peakCounts:1492.8	2544	+	158644604	ENST00000264263.9	ENSG00000168827.15	alternative	ENSG00000168827	GFM1
0.0267365	1.67525	13.4099	0.00139462	0.0867477	rDPI_19806	chr16	56425488	56425493	chr16:56425488..56425493,chr16:56425406..56425614,-;peak:chr16:56425490..56425491,-;peakCounts:160.6	995	-	56425490	ENST00000290649.10	ENSG00000159461.15	alternative	ENSG00000159461	AMFR
-0.0385703	3.27768	13.4094	0.00139483	0.0867477	rDPI_17770	chr15	65067953	65067955	chr15:65067953..65067955,chr15:65067741..65068072,-;peak:chr15:65067953..65067954,-;peakCounts:702.3	1353	-	65067953	ENST00000421977.7	ENSG00000103710.11	alternative	ENSG00000103710	RASL12
-0.0309095	5.42295	13.4084	0.00139527	0.0867477	rDPI_4974	chr1	228109278	228109309	chr1:228109278..228109309,chr1:228109200..228109379,-;peak:chr1:228109299..228109300,-;peakCounts:5344.2	25649	-	228109299	ENST00000366744.5	ENSG00000162910.19	promoter	ENSG00000162910	MRPL55
0.0266838	5.37508	13.4053	0.00139673	0.0867477	rDPI_17080	chr15	40039177	40039182	chr15:40039177..40039182,chr15:40039065..40039270,-;peak:chr15:40039181..40039182,-;peakCounts:17707.4	29041	-	40039181	ENST00000267884.11	ENSG00000140319.11	alternative	ENSG00000140319	SRP14
-0.0390796	1.47609	13.4042	0.0013972	0.0867477	rDPI_14879	chr14	23390061	23390064	chr14:23390061..23390064,chr14:23390009..23390123,-;peak:chr14:23390061..23390062,-;peakCounts:232.5	423	-	23390061	ENST00000362287.2	ENSG00000199157.2	alternative	ENSG00000199157	MIR208A
-0.0564466	1.67506	13.403	0.00139774	0.0867477	rDPI_35231	chr22	36329372	36329383	chr22:36329372..36329383,chr22:36329345..36329405,-;peak:chr22:36329377..36329378,-;peakCounts:110.7	164	-	36329377	ENST00000463027.1	ENSG00000100345.22	enhancer	ENSG00000100345	MYH9
0.0240719	1.6176	13.3927	0.0014025	0.0867477	rDPI_18936	chr16	4116417	4116423	chr16:4116417..4116423,chr16:4116345..4116550,-;peak:chr16:4116417..4116418,-;peakCounts:387.2	1020	-	4116417	ENST00000294016.8	ENSG00000162104.10	alternative	ENSG00000162104	ADCY9
0.047808	4.27298	13.3905	0.0014035	0.0867477	rDPI_14122	chr13	45418346	45418350	chr13:45418346..45418350,chr13:45418297..45418465,-;peak:chr13:45418346..45418347,-;peakCounts:15034.5	29128	-	45418346	ENST00000519676.6	ENSG00000174032.17	promoter	ENSG00000174032	SLC25A30
-0.0363189	2.13915	13.3869	0.00140515	0.0867477	rDPI_27770	chr2	18560473	18560479	chr2:18560473..18560479,chr2:18560202..18560751,-;peak:chr2:18560473..18560474,-;peakCounts:576.6	2079	-	18560473	ENST00000381249.4	ENSG00000240857.2	alternative	ENSG00000240857	RDH14
-0.0266219	1.79257	13.3866	0.00140529	0.0867477	rDPI_7487	chr10	114526847	114526851	chr10:114526847..114526851,chr10:114526718..114526976,-;peak:chr10:114526848..114526849,-;peakCounts:57.1	539	-	114526848	ENST00000369253.6	ENSG00000099204.20	alternative	ENSG00000099204	ABLIM1
-0.0325472	3.04163	13.3856	0.00140579	0.0867477	rDPI_33935	chr20	62926502	62926509	chr20:62926502..62926509,chr20:62926465..62926625,-;peak:chr20:62926505..62926506,-;peakCounts:1722.6	2491	-	62926505	ENST00000395343.6	ENSG00000101191.17	alternative	ENSG00000101191	DIDO1
0.0330434	1.72169	13.3798	0.00140846	0.0867477	rDPI_13507	chr12	123151109	123151135	chr12:123151109..123151135,chr12:123150776..123151165,-;peak:chr12:123151114..123151115,-;peakCounts:219.8	1108	-	123151114	ENST00000542210.1	ENSG00000090975.13	enhancer	ENSG00000090975	PITPNM2
-0.0326249	4.81602	13.3784	0.00140909	0.0867477	rDPI_5179	chr1	236065169	236065175	chr1:236065169..236065175,chr1:236064931..236065247,-;peak:chr1:236065174..236065175,-;peakCounts:3597.2	10716	-	236065174	ENST00000366595.7	ENSG00000116962.15	alternative	ENSG00000116962	NID1
-0.0236686	4.71058	13.3784	0.00140909	0.0867477	rDPI_1485	chr1	42335229	42335237	chr1:42335229..42335237,chr1:42335086..42335307,-;peak:chr1:42335232..42335233,-;peakCounts:4048.7	10453	-	42335232	ENST00000361346.6	ENSG00000198815.9	alternative	ENSG00000198815	FOXJ3
0.0319132	5.94563	13.3752	0.00141059	0.0867477	rDPI_48910	chr7	139777993	139778004	chr7:139777993..139778004,chr7:139777845..139778062,-;peak:chr7:139777998..139777999,-;peakCounts:19288.8	50522	-	139777998	ENST00000406875.8	ENSG00000064393.16	promoter	ENSG00000064393	HIPK2
-0.0217804	5.04977	13.3746	0.00141086	0.0867477	rDPI_7350	chr10	110008231	110008233	chr10:110008231..110008233,chr10:110008069..110008290,+;peak:chr10:110008231..110008232,+;peakCounts:14378.4	20301	+	110008231	ENST00000495661.5	ENSG00000148700.15	alternative	ENSG00000148700	ADD3
-0.0350848	3.48804	13.369	0.00141347	0.0868264	rDPI_10233	chr11	111879534	111879546	chr11:111879534..111879546,chr11:111879445..111879556,+;peak:chr11:111879537..111879538,+;peakCounts:993.6	4315	+	111879537	ENST00000260276.8	ENSG00000137720.8	promoter	ENSG00000137720	C11orf1
-0.0290671	2.919	13.3552	0.00141986	0.0870296	rDPI_617	chr1	16686251	16686253	chr1:16686251..16686253,-	4185	-	16686251	ENST00000419267.1	ENSG00000236698.1	not_classified	ENSG00000236698	NA
-0.035193	1.71189	13.3539	0.00142048	0.0870296	rDPI_34853	chr22	23767458	23767479	chr22:23767458..23767479,chr22:23767391..23767598,-;peak:chr22:23767473..23767474,-;peakCounts:448.2	1391	-	23767473	ENST00000520222.1	ENSG00000250479.9	alternative	ENSG00000250479	CHCHD10
-0.0552625	5.07674	13.3486	0.00142296	0.0870296	rDPI_12820	chr12	104265436	104265501	chr12:104265436..104265501,chr12:104265436..104265501,+	12633	+	104265487	ENST00000462885.1	ENSG00000213442.5	alternative	ENSG00000213442	RPL18AP3
-0.0407712	3.25583	13.3481	0.00142318	0.0870296	rDPI_946	chr1	26280065	26280070	chr1:26280065..26280070,chr1:26280018..26280201,+;peak:chr1:26280065..26280066,+;peakCounts:3568.7	4736	+	26280065	ENST00000270792.10	ENSG00000142669.15	alternative	ENSG00000142669	SH3BGRL3
0.0394913	3.9117	13.3476	0.00142344	0.0870296	rDPI_100	chr1	1349413	1349423	chr1:1349413..1349423,chr1:1349287..1349466,-;peak:chr1:1349418..1349419,-;peakCounts:4491	9661	-	1349418	ENST00000378888.10	ENSG00000107404.20	promoter	ENSG00000107404	DVL1
0.0394358	2.83301	13.3407	0.00142668	0.087146	rDPI_34477	chr21	41168155	41168178	chr21:41168155..41168178,chr21:41168077..41168219,+;peak:chr21:41168160..41168161,+;peakCounts:1834.2	3230	+	41168160	ENST00000330333.11	ENSG00000182240.16	promoter	ENSG00000182240	BACE2
0.0514384	2.48674	13.3298	0.00143179	0.0873768	rDPI_50672	chr8	119638839	119638840	chr8:119638839..119638840,chr8:119638816..119638883,-;peak:chr8:119638839..119638840,-;peakCounts:1584.9	1761	-	119638839	ENST00000075322.11	ENSG00000136960.13	promoter	ENSG00000136960	ENPP2
0.0564277	5.058	13.3245	0.00143431	0.08741	rDPI_43261	chr5	150624699	150624710	chr5:150624699..150624710,chr5:150624508..150624916,+;peak:chr5:150624702..150624703,+;peakCounts:5367	28942	+	150624702	ENST00000518872.1	ENSG00000171992.13	alternative	ENSG00000171992	SYNPO
-0.0502315	3.28702	13.3203	0.00143626	0.08741	rDPI_53347	chrM	4682	4693	chrM:4682..4693,chrM:4656..4740,+;peak:chrM:4687..4688,+;peakCounts:2691.2	8584	+	4687	ENST00000361453.3	ENSG00000198763.3	alternative	ENSG00000198763	ND2
-0.0327049	2.41941	13.3184	0.00143717	0.08741	rDPI_46370	chr6	152381316	152381327	chr6:152381316..152381327,chr6:152381095..152381478,-;peak:chr6:152381320..152381321,-;peakCounts:317.7	1386	-	152381320	ENST00000454018.6	ENSG00000131018.24	alternative	ENSG00000131018	SYNE1
-0.0282953	2.41339	13.3173	0.00143769	0.08741	rDPI_24102	chr18	55589802	55589812	chr18:55589802..55589812,chr18:55589773..55589861,-;peak:chr18:55589811..55589812,-;peakCounts:464.6	1786	-	55589811	ENST00000629387.2	ENSG00000196628.20	alternative	ENSG00000196628	TCF4
0.0258279	1.789	13.3109	0.00144071	0.0874965	rDPI_36125	chr3	16884960	16884969	chr3:16884960..16884969,chr3:16884916..16885048,+;peak:chr3:16884963..16884964,+;peakCounts:398	1218	+	16884963	ENST00000615277.5	ENSG00000154822.18	alternative	ENSG00000154822	PLCL2
-0.0270202	2.31084	13.3086	0.00144179	0.0874965	rDPI_12894	chr12	106987058	106987063	chr12:106987058..106987063,chr12:106986995..106987174,-;peak:chr12:106987058..106987059,-;peakCounts:684.3	1812	-	106987058	ENST00000548101.1	ENSG00000120832.10	alternative	ENSG00000120832	MTERF2
0.0342493	2.12464	13.3033	0.00144432	0.0875686	rDPI_52978	chr9	131740110	131740116	chr9:131740110..131740116,chr9:131739907..131740137,-;peak:chr9:131740113..131740114,-;peakCounts:877.9	1685	-	131740113	ENST00000372195.5	ENSG00000107263.18	alternative	ENSG00000107263	RAPGEF1
0.0404663	2.73968	13.2946	0.00144848	0.0876776	rDPI_23424	chr18	500726	500735	chr18:500726..500735,chr18:500607..500824,-;peak:chr18:500730..500731,-;peakCounts:980.1	2964	-	500730	ENST00000582147.1	ENSG00000158270.12	alternative	ENSG00000158270	COLEC12
-0.0295547	5.06279	13.2921	0.00144965	0.0876776	rDPI_38894	chr3	195543315	195543331	chr3:195543315..195543331,chr3:195543189..195543365,-;peak:chr3:195543325..195543326,-;peakCounts:3197.5	13799	-	195543325	ENST00000618156.5	ENSG00000184203.8	promoter	ENSG00000184203	PPP1R2
-0.0448223	1.84569	13.2911	0.00145015	0.0876776	rDPI_22193	chr17	46851581	46851590	chr17:46851581..46851590,+	1066	+	46851584	ENST00000290015.7	ENSG00000158955.11	promoter	ENSG00000158955	WNT9B
-0.023867	2.62822	13.2859	0.00145263	0.0877463	rDPI_48895	chr7	139359911	139359913	chr7:139359911..139359913,chr7:139359757..139360061,+;peak:chr7:139359911..139359912,+;peakCounts:1164.2	2003	+	139359911	ENST00000456182.5	ENSG00000146963.18	alternative	ENSG00000146963	LUC7L2
0.0381135	3.35986	13.2819	0.00145452	0.0877795	rDPI_3984	chr1	179025918	179025925	chr1:179025918..179025925,chr1:179025800..179026167,+;peak:chr1:179025921..179025922,+;peakCounts:2009.6	4942	+	179025921	ENST00000263733.5	ENSG00000116199.12	alternative	ENSG00000116199	FAM20B
-0.0402458	3.7241	13.2788	0.00145603	0.0877894	rDPI_35402	chr22	39319622	39319624	chr22:39319622..39319624,chr22:39319606..39319686,-;peak:chr22:39319622..39319623,-;peakCounts:7484.4	10436	-	39319622	ENST00000216146.9	ENSG00000100316.16	promoter	ENSG00000100316	RPL3
0.0596945	5.97937	13.2638	0.00146325	0.0881433	rDPI_24882	chr19	7516096	7516111	chr19:7516096..7516111,chr19:7516065..7516250,+;peak:chr19:7516103..7516104,+;peakCounts:12776.4	40545	+	7516103	ENST00000597229.2	ENSG00000198816.7	promoter	ENSG00000198816	ZNF358
0.0477709	3.30207	13.2571	0.00146648	0.0882271	rDPI_24600	chr19	3094382	3094385	chr19:3094382..3094385,chr19:3094306..3094726,+;peak:chr19:3094384..3094385,+;peakCounts:3646.8	6443	+	3094384	ENST00000078429.9	ENSG00000088256.9	alternative	ENSG00000088256	GNA11
-0.0280322	1.39948	13.2553	0.00146734	0.0882271	rDPI_48109	chr7	99505290	99505295	chr7:99505290..99505295,chr7:99505243..99505326,+;peak:chr7:99505294..99505295,+;peakCounts:151	401	+	99505294	ENST00000454175.1	ENSG00000196652.12	alternative	ENSG00000196652	ZKSCAN5
-0.0767465	1.63925	13.2518	0.00146906	0.088249	rDPI_34083	chr21	8393394	8393415	chr21:8393394..8393415,+	1837	+	8393414	ENST00000613359.1	ENSG00000275215.1	alternative	ENSG00000275215	RNA5-8SN3
0.039901	5.51371	13.2364	0.00147651	0.0886148	rDPI_27569	chr19	58558538	58558554	chr19:58558538..58558554,chr19:58558317..58558636,-;peak:chr19:58558546..58558547,-;peakCounts:8757.9	26755	-	58558546	ENST00000253023.8	ENSG00000130725.8	promoter	ENSG00000130725	UBE2M
0.0221192	2.86003	13.2219	0.0014836	0.0889436	rDPI_49655	chr8	26291508	26291514	chr8:26291508..26291514,chr8:26291489..26291728,+;peak:chr8:26291508..26291509,+;peakCounts:4172.5	5888	+	26291508	ENST00000380737.8	ENSG00000221914.11	alternative	ENSG00000221914	PPP2R2A
-0.0372019	4.55494	13.2197	0.00148471	0.0889436	rDPI_26846	chr19	48325368	48325379	chr19:48325368..48325379,chr19:48325268..48325611,+;peak:chr19:48325373..48325374,+;peakCounts:11647.6	15039	+	48325373	ENST00000596315.5	ENSG00000142227.11	alternative	ENSG00000142227	EMP3
-0.0365737	2.65669	13.2143	0.00148733	0.0890188	rDPI_38450	chr3	161105043	161105049	chr3:161105043..161105049,chr3:161104919..161105499,-;peak:chr3:161105043..161105044,-;peakCounts:451.9	2536	-	161105043	ENST00000651689.1	ENSG00000169255.15	alternative	ENSG00000169255	B3GALNT1
-0.0533203	2.43519	13.2066	0.00149113	0.0891473	rDPI_53425	chrM	8072	8080	chrM:8072..8080,chrM:7947..8202,+;peak:chrM:8074..8075,+;peakCounts:2074.1	7620	+	8074	ENST00000387421.1	ENSG00000210156.1	alternative	ENSG00000210156	NA
-0.0236403	3.08591	13.2013	0.00149373	0.0891473	rDPI_44834	chr6	34696748	34696760	chr6:34696748..34696760,chr6:34696587..34696889,-;peak:chr6:34696748..34696749,-;peakCounts:983.3	3837	-	34696748	ENST00000374023.8	ENSG00000196821.10	alternative	ENSG00000196821	ILRUN
-0.0269578	1.96135	13.2006	0.00149407	0.0891473	rDPI_16058	chr14	73490966	73490974	chr14:73490966..73490974,chr14:73490914..73491019,+;peak:chr14:73490970..73490971,+;peakCounts:549.7	1106	+	73490970	ENST00000304061.8	ENSG00000170468.8	alternative	ENSG00000170468	RIOX1
0.0326573	2.26512	13.1989	0.00149494	0.0891473	rDPI_53086	chr9	135961357	135961363	chr9:135961357..135961363,chr9:135961115..135961411,-;peak:chr9:135961362..135961363,-;peakCounts:419.2	1877	-	135961362	ENST00000371756.4	ENSG00000130560.9	alternative	ENSG00000130560	UBAC1
0.0354666	4.94471	13.1888	0.00149994	0.0893644	rDPI_12200	chr12	57128511	57128521	chr12:57128511..57128521,chr12:57128436..57128582,+;peak:chr12:57128515..57128516,+;peakCounts:12919.4	20091	+	57128515	ENST00000553277.5	ENSG00000123384.14	alternative	ENSG00000123384	LRP1
0.0238657	6.55075	13.1693	0.00150963	0.0898596	rDPI_47570	chr7	66995580	66995595	chr7:66995580..66995595,chr7:66995449..66995706,-;peak:chr7:66995586..66995587,-;peakCounts:47250	73637	-	66995586	ENST00000246868.7	ENSG00000126524.10	promoter	ENSG00000126524	SBDS
0.052275	2.87745	13.1608	0.00151385	0.0899224	rDPI_19396	chr16	29663215	29663273	chr16:29663215..29663273,chr16:29663215..29663273,+	3091	+	29663247	ENST00000436527.5	ENSG00000197471.12	promoter	ENSG00000197471	SPN
0.0375885	2.22853	13.1571	0.00151573	0.0899224	rDPI_16691	chr14	105168728	105168734	chr14:105168728..105168734,chr14:105168659..105168789,-;peak:chr14:105168728..105168729,-;peakCounts:1792.8	2426	-	105168728	ENST00000331782.8	ENSG00000184916.9	alternative	ENSG00000184916	JAG2
-0.0360423	8.71366	13.1528	0.00151789	0.0899224	rDPI_3915	chr1	173477335	173477339	chr1:173477335..173477339,chr1:173477264..173477490,+;peak:chr1:173477335..173477336,+;peakCounts:110796.3	145843	+	173477335	ENST00000340385.6	ENSG00000117592.9	promoter	ENSG00000117592	PRDX6
-0.0338002	3.75475	13.1508	0.00151887	0.0899224	rDPI_38312	chr3	152269654	152269663	chr3:152269654..152269663,chr3:152269573..152269761,+;peak:chr3:152269659..152269660,+;peakCounts:2966.4	6578	+	152269659	ENST00000460591.5	ENSG00000152601.17	enhancer	ENSG00000152601	MBNL1
-0.0420441	2.82583	13.1507	0.00151892	0.0899224	rDPI_6109	chr10	50061666	50061680	chr10:50061666..50061680,chr10:50061643..50061737,-;peak:chr10:50061671..50061672,-;peakCounts:621	1290	-	50061671	ENST00000649244.1	ENSG00000235618.8	not_classified	ENSG00000235618	FAM21EP
0.0193377	4.29113	13.1461	0.00152125	0.0899224	rDPI_39231	chr4	7068042	7068048	chr4:7068042..7068048,chr4:7067983..7068243,-;peak:chr4:7068042..7068043,-;peakCounts:14184	18356	-	7068042	ENST00000504920.5	ENSG00000109519.13	alternative	ENSG00000109519	GRPEL1
-0.0286616	6.05121	13.142	0.00152333	0.0899224	rDPI_678	chr1	19608079	19608089	chr1:19608079..19608089,+	218041	+	19608079	ENST00000457263.1	ENSG00000226396.1	promoter	ENSG00000226396	NA
0.0408403	4.39237	13.1404	0.00152411	0.0899224	rDPI_9582	chr11	67266464	67266474	chr11:67266464..67266474,chr11:67266347..67266504,+;peak:chr11:67266473..67266474,+;peakCounts:8267.4	12124	+	67266473	ENST00000308595.10	ENSG00000173020.11	promoter	ENSG00000173020	GRK2
0.0427328	2.95498	13.1338	0.00152745	0.0899224	rDPI_17741	chr15	64460568	64460593	chr15:64460568..64460593,chr15:64460544..64460694,+;peak:chr15:64460578..64460579,+;peakCounts:1361.7	5821	+	64460578	ENST00000416172.1	ENSG00000180357.9	promoter	ENSG00000180357	ZNF609
0.0394251	1.91714	13.1331	0.00152783	0.0899224	rDPI_53124	chr9	136546019	136546025	chr9:136546019..136546025,chr9:136545940..136546080,-;peak:chr9:136546019..136546020,-;peakCounts:521.4	1619	-	136546019	ENST00000680924.1	ENSG00000148400.13	alternative	ENSG00000148400	NOTCH1
-0.0368112	2.64183	13.132	0.00152838	0.0899224	rDPI_21633	chr17	35795614	35795620	chr17:35795614..35795620,chr17:35795550..35795653,-;peak:chr17:35795614..35795615,-;peakCounts:1310.4	1546	-	35795614	ENST00000615136.4	ENSG00000271447.6	promoter	ENSG00000271447	MMP28
-0.0285958	2.80775	13.1294	0.00152967	0.0899224	rDPI_52968	chr9	131531254	131531263	chr9:131531254..131531263,chr9:131531157..131531290,-;peak:chr9:131531258..131531259,-;peakCounts:1465.2	2287	-	131531258	ENST00000372208.7	ENSG00000130717.13	alternative	ENSG00000130717	UCK1
0.0380021	2.51214	13.1282	0.0015303	0.0899224	rDPI_47984	chr7	94509810	94509825	chr7:94509810..94509825,chr7:94509580..94509956,+;peak:chr7:94509822..94509823,+;peakCounts:755.6	2962	+	94509822	ENST00000297273.9	ENSG00000127995.17	promoter	ENSG00000127995	CASD1
-0.0468128	2.24848	13.1266	0.00153109	0.0899224	rDPI_34620	chr21	46286395	46286398	chr21:46286395..46286398,chr21:46286288..46286409,+;peak:chr21:46286396..46286397,+;peakCounts:448.5	1288	+	46286396	ENST00000397692.5	ENSG00000182362.14	alternative	ENSG00000182362	YBEY
0.032795	1.92555	13.1261	0.00153134	0.0899224	rDPI_49273	chr8	1823943	1823951	chr8:1823943..1823951,chr8:1823906..1824096,+;peak:chr8:1823947..1823948,+;peakCounts:1175	1902	+	1823947	ENST00000349830.8	ENSG00000104728.16	alternative	ENSG00000104728	ARHGEF10
0.0381263	1.56302	13.117	0.00153596	0.0900414	rDPI_46241	chr6	144200832	144200839	chr6:144200832..144200839,+	1737	+	144200838	ENST00000367568.5	ENSG00000135604.10	enhancer	ENSG00000135604	STX11
-0.0182096	6.05642	13.1167	0.00153613	0.0900414	rDPI_11907	chr12	54280113	54280127	chr12:54280113..54280127,chr12:54280028..54280183,-;peak:chr12:54280122..54280123,-;peakCounts:18431.1	43587	-	54280122	ENST00000209875.9	ENSG00000094916.16	promoter	ENSG00000094916	CBX5
0.0278811	1.05216	13.1132	0.00153793	0.0900664	rDPI_12640	chr12	93571937	93571941	chr12:93571937..93571941,chr12:93571849..93571949,+;peak:chr12:93571939..93571940,+;peakCounts:197.7	324	+	93571939	ENST00000549887.1	ENSG00000120833.14	alternative	ENSG00000120833	SOCS2
-0.0229269	1.45085	13.1004	0.00154442	0.0902761	rDPI_22540	chr17	58089466	58089483	chr17:58089466..58089483,chr17:58089177..58089539,+;peak:chr17:58089473..58089474,+;peakCounts:356.4	868	+	58089473	ENST00000579991.3	ENSG00000264364.3	enhancer	ENSG00000264364	DYNLL2
-0.0262692	1.6527	13.099	0.00154516	0.0902761	rDPI_42295	chr5	93583392	93583406	chr5:93583392..93583406,chr5:93583326..93583429,+;peak:chr5:93583400..93583401,+;peakCounts:98.1	360	+	93583400	ENST00000327111.8	ENSG00000175745.14	alternative	ENSG00000175745	NR2F1
0.0321169	3.09624	13.098	0.00154566	0.0902761	rDPI_47123	chr7	30134981	30134996	chr7:30134981..30134996,chr7:30134921..30135171,+;peak:chr7:30134986..30134987,+;peakCounts:1876.2	6212	+	30134986	ENST00000324453.13	ENSG00000180354.16	promoter	ENSG00000180354	MTURN
-0.0304388	3.13182	13.0932	0.00154812	0.0903387	rDPI_9721	chr11	70270732	70270740	chr11:70270732..70270740,chr11:70270626..70270808,+;peak:chr11:70270736..70270737,+;peakCounts:2013.9	3435	+	70270736	ENST00000389547.7	ENSG00000131626.19	alternative	ENSG00000131626	PPFIA1
-0.0247777	1.78483	13.0897	0.00154994	0.0903643	rDPI_32789	chr20	3173559	3173567	chr20:3173559..3173567,chr20:3173522..3173622,-;peak:chr20:3173563..3173564,-;peakCounts:203.5	775	-	3173563	ENST00000360342.7	ENSG00000088899.15	alternative	ENSG00000088899	LZTS3
0.0285382	7.12299	13.0865	0.0015516	0.0903804	rDPI_36881	chr3	50236202	50236208	chr3:50236202..50236208,chr3:50236151..50236373,+;peak:chr3:50236204..50236205,+;peakCounts:60648.3	84697	+	50236204	ENST00000441156.5	ENSG00000114353.17	promoter	ENSG00000114353	GNAI2
-0.0209166	3.44049	13.0816	0.00155412	0.0903999	rDPI_55031	chrX	154097674	154097680	chrX:154097674..154097680,chrX:154097611..154097788,-;peak:chrX:154097674..154097675,-;peakCounts:2499.1	4305	-	154097674	ENST00000627864.1	ENSG00000169057.24	alternative	ENSG00000169057	MECP2
-0.0219937	4.72679	13.0804	0.00155471	0.0903999	rDPI_22071	chr17	44066646	44066657	chr17:44066646..44066657,chr17:44066599..44066701,-;peak:chr17:44066651..44066652,-;peakCounts:7615.8	10597	-	44066651	ENST00000585388.2	ENSG00000161654.10	promoter	ENSG00000161654	LSM12
0.0218581	1.61798	13.0688	0.0015607	0.0906678	rDPI_35989	chr3	12994359	12994377	chr3:12994359..12994377,chr3:12994089..12994416,-;peak:chr3:12994370..12994371,-;peakCounts:214.7	1327	-	12994370	ENST00000648386.1	ENSG00000144711.16	alternative	ENSG00000144711	IQSEC1
0.028694	1.72481	13.065	0.00156269	0.0907025	rDPI_46282	chr6	148342813	148342824	chr6:148342813..148342824,chr6:148342694..148342889,+;peak:chr6:148342818..148342819,+;peakCounts:847.8	1601	+	148342818	ENST00000367467.8	ENSG00000111961.18	alternative	ENSG00000111961	SASH1
0.0295856	2.68361	13.0514	0.00156978	0.0909017	rDPI_6457	chr10	73496013	73496019	chr10:73496013..73496019,chr10:73495972..73496044,-;peak:chr10:73496016..73496017,-;peakCounts:2653.9	5203	-	73496016	ENST00000394829.6	ENSG00000107758.16	alternative	ENSG00000107758	PPP3CB
0.0392524	3.81532	13.0506	0.00157016	0.0909017	rDPI_9249	chr11	64246894	64246923	chr11:64246894..64246923,chr11:64246546..64246976,-;peak:chr11:64246903..64246904,-;peakCounts:1235.1	8045	-	64246903	ENST00000309318.8	ENSG00000173457.11	alternative	ENSG00000173457	PPP1R14B
-0.0330989	3.9585	13.0492	0.00157089	0.0909017	rDPI_36020	chr3	14125128	14125139	chr3:14125128..14125139,chr3:14124924..14125186,+;peak:chr3:14125133..14125134,+;peakCounts:1903.6	5035	+	14125133	ENST00000306077.5	ENSG00000170876.8	alternative	ENSG00000170876	TMEM43
0.0331729	2.2229	13.0444	0.00157338	0.0909017	rDPI_19135	chr16	15056074	15056082	chr16:15056074..15056082,chr16:15055913..15056118,-;peak:chr16:15056079..15056080,-;peakCounts:771.7	1917	-	15056079	ENST00000622833.4	ENSG00000157045.9	alternative	ENSG00000157045	NTAN1
-0.0553083	4.00023	13.0397	0.00157589	0.0909017	rDPI_53285	chrM	303	309	chrM:303..309,chrM:42..435,-;peak:chrM:303..304,-;peakCounts:1105.1	6187	-	303	ENST00000387372.1	ENSG00000210107.1	alternative	ENSG00000210107	NA
0.0291974	4.8231	13.0366	0.00157747	0.0909017	rDPI_7499	chr10	114632260	114632266	chr10:114632260..114632266,chr10:114631904..114632398,-;peak:chr10:114632265..114632266,-;peakCounts:28411.8	35902	-	114632265	ENST00000651023.1	ENSG00000099204.20	alternative	ENSG00000099204	ABLIM1
0.0348192	1.57375	13.0358	0.00157788	0.0909017	rDPI_24752	chr19	4581763	4581780	chr19:4581763..4581780,chr19:4581733..4581835,-;peak:chr19:4581768..4581769,-;peakCounts:239.4	745	-	4581768	ENST00000676793.1	ENSG00000167680.17	promoter	ENSG00000167680	SEMA6B
-0.0234474	3.45954	13.0326	0.0015796	0.0909017	rDPI_29109	chr2	95121976	95121987	chr2:95121976..95121987,chr2:95121898..95122035,-;peak:chr2:95121981..95121982,-;peakCounts:2836.7	5794	-	95121981	ENST00000475895.5	ENSG00000144029.12	alternative	ENSG00000144029	MRPS5
-0.0505152	4.49284	13.0314	0.00158021	0.0909017	rDPI_47340	chr7	44140813	44140820	chr7:44140813..44140820,chr7:44140704..44140905,-;peak:chr7:44140819..44140820,-;peakCounts:2041.2	4172	-	44140819	ENST00000434895.5	ENSG00000106631.8	alternative	ENSG00000106631	MYL7
-0.0453907	3.15776	13.0259	0.00158309	0.0909017	rDPI_53824	chrX	38612576	38612609	chrX:38612576..38612609,chrX:38612510..38612657,+;peak:chrX:38612585..38612586,+;peakCounts:282	2101	+	38612585	ENST00000494037.1	ENSG00000156298.13	enhancer	ENSG00000156298	TSPAN7
0.0243851	3.71439	13.0255	0.00158329	0.0909017	rDPI_1081	chr1	28736937	28736944	chr1:28736937..28736944,chr1:28736843..28737137,+;peak:chr1:28736940..28736941,+;peakCounts:7436.7	10406	+	28736940	ENST00000373812.8	ENSG00000198492.16	alternative	ENSG00000198492	YTHDF2
-0.024327	2.46182	13.0224	0.00158493	0.0909017	rDPI_44592	chr6	31730242	31730246	chr6:31730242..31730246,chr6:31730175..31730295,-;peak:chr6:31730244..31730245,-;peakCounts:1053.6	1634	-	31730244	ENST00000488119.1	ENSG00000213722.10	alternative	ENSG00000213722	DDAH2
-0.0324312	1.86756	13.0199	0.00158628	0.0909017	rDPI_51850	chr9	81689517	81689520	chr9:81689517..81689520,chr9:81689462..81689669,-;peak:chr9:81689517..81689518,-;peakCounts:287.3	863	-	81689517	ENST00000376499.8	ENSG00000196781.16	alternative	ENSG00000196781	TLE1
0.0453147	3.91958	13.0157	0.00158846	0.0909017	rDPI_38872	chr3	194486963	194486978	chr3:194486963..194486978,chr3:194486780..194487059,-;peak:chr3:194486968..194486969,-;peakCounts:3301.7	9919	-	194486968	ENST00000645319.2	ENSG00000133657.16	alternative	ENSG00000133657	ATP13A3
0.0333393	2.88824	13.0146	0.00158906	0.0909017	rDPI_33375	chr20	37179346	37179351	chr20:37179346..37179351,chr20:37179263..37179364,+;peak:chr20:37179348..37179349,+;peakCounts:3558.7	6230	+	37179348	ENST00000237530.11	ENSG00000118705.17	alternative	ENSG00000118705	RPN2
-0.040765	3.73454	13.0137	0.00158952	0.0909017	rDPI_16531	chr14	101809856	101809873	chr14:101809856..101809873,chr14:101809791..101809949,+;peak:chr14:101809866..101809867,+;peakCounts:5010.3	9269	+	101809866	ENST00000553730.5	ENSG00000078304.19	promoter	ENSG00000078304	PPP2R5C
-0.027507	1.14143	13.0132	0.00158978	0.0909017	rDPI_45942	chr6	123512308	123512314	chr6:123512308..123512314,chr6:123512308..123512363,-;peak:chr6:123512308..123512309,-;peakCounts:187.4	276	-	123512308	ENST00000361029.8	ENSG00000186439.14	alternative	ENSG00000186439	TRDN
-0.0340516	2.67559	13.0081	0.0015925	0.0909773	rDPI_51347	chr9	19378854	19378865	chr9:19378854..19378865,chr9:19378728..19378924,-;peak:chr9:19378859..19378860,-;peakCounts:981.1	1608	-	19378859	ENST00000315377.4	ENSG00000137154.13	alternative	ENSG00000137154	RPS6
0.0336593	1.96181	13.0034	0.001595	0.0910405	rDPI_8350	chr11	17389303	17389319	chr11:17389303..17389319,chr11:17388870..17389411,-;peak:chr11:17389313..17389314,-;peakCounts:868.5	1512	-	17389313	ENST00000528731.1	ENSG00000187486.6	alternative	ENSG00000187486	KCNJ11
-0.0210669	2.53898	12.9955	0.0015992	0.0911494	rDPI_10345	chr11	114400625	114400638	chr11:114400625..114400638,chr11:114400507..114400754,+;peak:chr11:114400629..114400630,+;peakCounts:475	2277	+	114400629	ENST00000544313.5	ENSG00000076053.12	alternative	ENSG00000076053	RBM7
-0.10499	3.30569	12.993	0.00160054	0.0911494	rDPI_21883	chr17	41528308	41528309	chr17:41528308..41528309,-	2849	-	41528308	ENST00000361566.7	ENSG00000171345.13	promoter	ENSG00000171345	KRT19
-0.025025	5.96404	12.9919	0.0016011	0.0911494	rDPI_6485	chr10	73656049	73656064	chr10:73656049..73656064,chr10:73655825..73656142,-;peak:chr10:73656056..73656057,-;peakCounts:9632.8	35412	-	73656056	ENST00000394810.3	ENSG00000166317.12	alternative	ENSG00000166317	SYNPO2L
-0.0527295	1.91435	12.9875	0.00160342	0.0912021	rDPI_34129	chr21	8401697	8401709	chr21:8401697..8401709,chr21:8401628..8401712,+;peak:chr21:8401703..8401704,+;peakCounts:855.9	3359	+	8401703	ENST00000613359.1	ENSG00000275215.1	alternative	ENSG00000275215	RNA5-8SN3
0.0333703	1.70708	12.9844	0.00160511	0.0912187	rDPI_19180	chr16	19114067	19114087	chr16:19114067..19114087,chr16:19113866..19114373,+;peak:chr16:19114072..19114073,+;peakCounts:104.5	1107	+	19114072	ENST00000568526.1	ENSG00000261427.6	alternative	ENSG00000261427	NA
-0.0260508	2.00017	12.9811	0.00160684	0.0912378	rDPI_49268	chr8	1763784	1763795	chr8:1763784..1763795,chr8:1763712..1763890,+;peak:chr8:1763789..1763790,+;peakCounts:846.2	1274	+	1763789	ENST00000331222.6	ENSG00000182372.10	alternative	ENSG00000182372	CLN8
0.0265506	1.14708	12.9777	0.00160871	0.0912644	rDPI_10194	chr11	110092835	110092842	chr11:110092835..110092842,chr11:110092787..110093002,+;peak:chr11:110092838..110092839,+;peakCounts:64.1	664	+	110092838	ENST00000278590.8	ENSG00000149289.11	alternative	ENSG00000149289	ZC3H12C
0.0258017	4.14341	12.9736	0.00161088	0.0913086	rDPI_24848	chr19	6593306	6593307	chr19:6593306..6593307,+	8492	+	6593306	ENST00000600588.1	ENSG00000268785.1	promoter	ENSG00000268785	RPL7P50
-0.0223149	5.08392	12.9608	0.00161774	0.0916179	rDPI_54514	chrX	103607936	103607954	chrX:103607936..103607954,chrX:103607847..103608063,+;peak:chrX:103607941..103607942,+;peakCounts:4540.3	13294	+	103607941	ENST00000372627.10	ENSG00000196507.11	alternative	ENSG00000196507	TCEAL3
-0.0485435	2.84663	12.9552	0.00162075	0.0916959	rDPI_38673	chr3	184150039	184150040	chr3:184150039..184150040,+	2948	+	184150039	ENST00000433853.1	ENSG00000228205.1	enhancer	ENSG00000228205	RPS3P3
-0.0297138	3.46598	12.9523	0.00162234	0.0916959	rDPI_36473	chr3	42590850	42590864	chr3:42590850..42590864,chr3:42590831..42590914,+;peak:chr3:42590860..42590861,+;peakCounts:1442.6	4762	+	42590860	ENST00000011691.6	ENSG00000008324.12	promoter	ENSG00000008324	SS18L2
0.0475849	2.49046	12.9505	0.00162333	0.0916959	rDPI_37074	chr3	52835192	52835223	chr3:52835192..52835223,chr3:52835167..52835322,-;peak:chr3:52835201..52835202,-;peakCounts:324	1415	-	52835201	ENST00000446157.3	ENSG00000272573.6	alternative	ENSG00000272573	MUSTN1
-0.0334459	3.88468	12.9418	0.00162804	0.0917964	rDPI_20926	chr17	7242426	7242432	chr17:7242426..7242432,chr17:7242270..7242533,-;peak:chr17:7242429..7242430,-;peakCounts:7260.9	12720	-	7242429	ENST00000573928.1	ENSG00000170296.10	alternative	ENSG00000170296	GABARAP
-0.0409969	2.98746	12.939	0.00162956	0.0917964	rDPI_39616	chr4	55328155	55328159	chr4:55328155..55328159,chr4:55328153..55328210,+;peak:chr4:55328156..55328157,+;peakCounts:737.1	2275	+	55328156	ENST00000679836.1	ENSG00000128039.13	enhancer	ENSG00000128039	SRD5A3
0.0265447	1.24355	12.9314	0.00163368	0.0917964	rDPI_27652	chr2	9003825	9003844	chr2:9003825..9003844,chr2:9003796..9003964,-;peak:chr2:9003825..9003826,-;peakCounts:231.3	527	-	9003825	ENST00000477073.5	ENSG00000143797.12	alternative	ENSG00000143797	MBOAT2
0.0416552	2.90512	12.9299	0.0016345	0.0917964	rDPI_46741	chr7	2631983	2631994	chr7:2631983..2631994,chr7:2631911..2632070,+;peak:chr7:2631988..2631989,+;peakCounts:1558.8	2667	+	2631988	ENST00000258796.12	ENSG00000136295.15	alternative	ENSG00000136295	TTYH3
-0.0365488	2.96022	12.9231	0.00163823	0.0917964	rDPI_24101	chr18	55589777	55589784	chr18:55589777..55589784,chr18:55589773..55589861,-;peak:chr18:55589778..55589779,-;peakCounts:2550.6	3466	-	55589778	ENST00000636400.2	ENSG00000196628.20	promoter	ENSG00000196628	TCF4
-0.0251073	3.12123	12.922	0.00163882	0.0917964	rDPI_49847	chr8	38601264	38601265	chr8:38601264..38601265,-	4836	-	38601264	ENST00000524091.1	ENSG00000253570.1	promoter	ENSG00000253570	NA
0.0278286	3.81985	12.9217	0.00163895	0.0917964	rDPI_18662	chr16	715109	715123	chr16:715109..715123,chr16:715071..715191,+;peak:chr16:715118..715119,+;peakCounts:7856.1	14670	+	715118	ENST00000568223.7	ENSG00000103260.9	promoter	ENSG00000103260	METRN
0.0522819	1.96834	12.9193	0.00164031	0.0917964	rDPI_33991	chr20	63696651	63696659	chr20:63696651..63696659,chr20:63696620..63696689,+;peak:chr20:63696652..63696653,+;peakCounts:581.4	934	+	63696652	ENST00000369996.3	ENSG00000243509.6	promoter	ENSG00000243509	TNFRSF6B
-0.0294425	4.05967	12.9182	0.00164089	0.0917964	rDPI_28754	chr2	69387246	69387252	chr2:69387246..69387252,chr2:69387149..69387293,-;peak:chr2:69387250..69387251,-;peakCounts:3459.9	8089	-	69387250	ENST00000361060.5	ENSG00000198380.13	alternative	ENSG00000198380	GFPT1
-0.0334421	5.833	12.9178	0.00164111	0.0917964	rDPI_14060	chr13	43023604	43023611	chr13:43023604..43023611,chr13:43023375..43023732,+;peak:chr13:43023608..43023609,+;peakCounts:8971.6	26549	+	43023608	ENST00000379221.4	ENSG00000120675.6	alternative	ENSG00000120675	DNAJC15
-0.0313924	1.31087	12.9172	0.00164144	0.0917964	rDPI_15055	chr14	23414575	23414590	chr14:23414575..23414590,chr14:23414573..23414634,+;peak:chr14:23414580..23414581,+;peakCounts:135.9	212	+	23414580	ENST00000557368.1	ENSG00000258444.1	alternative	ENSG00000258444	NA
0.0404958	3.20523	12.9162	0.00164198	0.0917964	rDPI_44684	chr6	32439872	32439876	chr6:32439872..32439876,chr6:32439823..32439996,+;peak:chr6:32439872..32439873,+;peakCounts:2356.2	5094	+	32439872	ENST00000374982.5	ENSG00000204287.14	alternative	ENSG00000204287	HLA-DRA
0.0471826	7.26942	12.9088	0.00164606	0.0919457	rDPI_23186	chr17	78925386	78925388	chr17:78925386..78925388,chr17:78925365..78925466,-;peak:chr17:78925387..78925388,-;peakCounts:78541.2	94550	-	78925387	ENST00000262768.11	ENSG00000035862.12	promoter	ENSG00000035862	TIMP2
0.0372606	1.82186	12.9032	0.00164911	0.0920374	rDPI_10758	chr12	460152	460171	chr12:460152..460171,chr12:459925..460233,+;peak:chr12:460165..460166,+;peakCounts:228.8	1840	+	460165	ENST00000266383.10	ENSG00000139044.12	alternative	ENSG00000139044	B4GALNT3
0.0371922	3.82802	12.8955	0.00165335	0.0920979	rDPI_8453	chr11	26994105	26994133	chr11:26994105..26994133,chr11:26994025..26994228,+;peak:chr11:26994112..26994113,+;peakCounts:1846.8	8213	+	26994112	ENST00000318627.4	ENSG00000176971.4	promoter	ENSG00000176971	FIBIN
-0.0290879	2.96028	12.8909	0.00165587	0.0920979	rDPI_38149	chr3	139539683	139539694	chr3:139539683..139539694,chr3:139539505..139539758,-;peak:chr3:139539688..139539689,-;peakCounts:627.7	1570	-	139539688	ENST00000487424.2	ENSG00000114115.10	alternative	ENSG00000114115	RBP1
-0.0287924	2.17391	12.8874	0.00165781	0.0920979	rDPI_53539	chrM	16079	16091	chrM:16079..16091,chrM:15951..16531,+;peak:chrM:16085..16086,+;peakCounts:444.3	1254	+	16085	ENST00000387460.2	ENSG00000210195.2	alternative	ENSG00000210195	NA
0.0248941	1.84718	12.8851	0.0016591	0.0920979	rDPI_40145	chr4	94454743	94454754	chr4:94454743..94454754,chr4:94454629..94454853,+;peak:chr4:94454748..94454749,+;peakCounts:1665.9	2028	+	94454748	ENST00000508216.5	ENSG00000163110.15	alternative	ENSG00000163110	PDLIM5
-0.0245735	5.53816	12.8839	0.00165974	0.0920979	rDPI_6998	chr10	96750266	96750267	chr10:96750266..96750267,+	555797	+	96750266	ENST00000439189.1	ENSG00000236552.2	promoter	ENSG00000236552	RPL13AP5
-0.0358086	1.35496	12.8836	0.00165995	0.0920979	rDPI_16047	chr14	73105951	73105979	chr14:73105951..73105979,chr14:73105859..73106033,+;peak:chr14:73105962..73105963,+;peakCounts:216	577	+	73105962	ENST00000532483.5	ENSG00000119707.14	enhancer	ENSG00000119707	RBM25
-0.0288457	4.0519	12.8834	0.00166007	0.0920979	rDPI_20851	chr17	5439144	5439149	chr17:5439144..5439149,chr17:5438854..5439231,-;peak:chr17:5439146..5439147,-;peakCounts:4368.1	8716	-	5439146	ENST00000573406.1	ENSG00000108561.8	alternative	ENSG00000108561	C1QBP
0.0238796	2.02791	12.8758	0.00166426	0.0922521	rDPI_50534	chr8	100952896	100952907	chr8:100952896..100952907,chr8:100952851..100953023,-;peak:chr8:100952901..100952902,-;peakCounts:341.8	1375	-	100952901	ENST00000437293.5	ENSG00000164924.18	alternative	ENSG00000164924	YWHAZ
-0.0326294	3.64331	12.8722	0.00166626	0.0922845	rDPI_9255	chr11	64284662	64284668	chr11:64284662..64284668,chr11:64284524..64284759,-;peak:chr11:64284664..64284665,-;peakCounts:1950	5057	-	64284664	ENST00000309032.8	ENSG00000002330.14	alternative	ENSG00000002330	BAD
-0.0343324	2.72993	12.8689	0.00166811	0.0923089	rDPI_26701	chr19	46298397	46298401	chr19:46298397..46298401,chr19:46298353..46298467,+;peak:chr19:46298399..46298400,+;peakCounts:892.2	3327	+	46298399	ENST00000528563.5	ENSG00000124440.16	alternative	ENSG00000124440	HIF3A
-0.0355744	2.17944	12.8658	0.00166985	0.0923265	rDPI_17071	chr15	39934176	39934182	chr15:39934176..39934182,chr15:39934062..39934250,+;peak:chr15:39934181..39934182,+;peakCounts:461	1528	+	39934181	ENST00000560648.1	ENSG00000128829.12	alternative	ENSG00000128829	EIF2AK4
-0.0264956	2.3092	12.8581	0.00167413	0.0924433	rDPI_28406	chr2	54457232	54457239	chr2:54457232..54457239,chr2:54457156..54457276,+;peak:chr2:54457238..54457239,+;peakCounts:1648.8	3297	+	54457238	ENST00000389980.7	ENSG00000115306.16	promoter	ENSG00000115306	SPTBN1
0.0384722	1.70715	12.8569	0.00167479	0.0924433	rDPI_27848	chr2	24920207	24920215	chr2:24920207..24920215,chr2:24920016..24920267,-;peak:chr2:24920209..24920210,-;peakCounts:418.8	1104	-	24920209	ENST00000679454.1	ENSG00000138031.15	alternative	ENSG00000138031	ADCY3
-0.0189922	5.93196	12.849	0.00167924	0.0924594	rDPI_2872	chr1	145964712	145964724	chr1:145964712..145964724,chr1:145964661..145964757,+;peak:chr1:145964717..145964718,+;peakCounts:11466	33115	+	145964717	ENST00000471706.1	ENSG00000121851.13	promoter	ENSG00000121851	POLR3GL
-0.0279205	3.59632	12.848	0.00167977	0.0924594	rDPI_13931	chr13	32586449	32586469	chr13:32586449..32586469,chr13:32586389..32586597,+;peak:chr13:32586452..32586453,+;peakCounts:2227.5	6396	+	32586452	ENST00000315596.15	ENSG00000083642.19	promoter	ENSG00000083642	PDS5B
0.0228319	4.61427	12.8462	0.00168079	0.0924594	rDPI_12032	chr12	56104556	56104571	chr12:56104556..56104571,chr12:56104478..56104782,+;peak:chr12:56104559..56104560,+;peakCounts:4951.8	17355	+	56104559	ENST00000303305.11	ENSG00000170515.14	alternative	ENSG00000170515	PA2G4
0.0310556	1.51508	12.845	0.00168149	0.0924594	rDPI_17568	chr15	58279259	58279269	chr15:58279259..58279269,chr15:58279243..58279333,-;peak:chr15:58279263..58279264,-;peakCounts:365.4	487	-	58279263	ENST00000558231.5	ENSG00000128918.15	alternative	ENSG00000128918	ALDH1A2
-0.0341123	5.06992	12.8361	0.00168651	0.0924594	rDPI_45656	chr6	105180003	105180020	chr6:105180003..105180020,chr6:105179850..105180324,-;peak:chr6:105180014..105180015,-;peakCounts:6073.2	15754	-	105180014	ENST00000254765.4	ENSG00000132429.10	promoter	ENSG00000132429	POPDC3
0.0319959	2.93041	12.8353	0.00168695	0.0924594	rDPI_8928	chr11	59615749	59615765	chr11:59615749..59615765,chr11:59615668..59615906,-;peak:chr11:59615758..59615759,-;peakCounts:1443	4921	-	59615758	ENST00000263847.6	ENSG00000110048.12	alternative	ENSG00000110048	OSBP
0.0339178	2.88929	12.8321	0.00168877	0.0924594	rDPI_34712	chr22	19431728	19431737	chr22:19431728..19431737,chr22:19431687..19431766,-;peak:chr22:19431733..19431734,-;peakCounts:2596.5	3926	-	19431733	ENST00000263208.5	ENSG00000100084.14	promoter	ENSG00000100084	HIRA
-0.0267649	4.68304	12.8301	0.00168986	0.0924594	rDPI_40100	chr4	88592477	88592495	chr4:88592477..88592495,chr4:88592427..88592544,+;peak:chr4:88592483..88592484,+;peakCounts:4957.2	15178	+	88592483	ENST00000402738.6	ENSG00000138641.18	promoter	ENSG00000138641	HERC3
-0.0275004	2.38987	12.8297	0.00169007	0.0924594	rDPI_52598	chr9	123340021	123340027	chr9:123340021..123340027,chr9:123339920..123340098,-;peak:chr9:123340021..123340022,-;peakCounts:111.7	1428	-	123340021	ENST00000385256.1	ENSG00000207991.1	alternative	ENSG00000207991	MIR601
0.0254868	1.92468	12.8275	0.00169134	0.0924594	rDPI_41286	chr5	1345096	1345100	chr5:1345096..1345100,chr5:1344946..1345136,-;peak:chr5:1345099..1345100,-;peakCounts:2019.5	2525	-	1345099	ENST00000320895.10	ENSG00000049656.14	alternative	ENSG00000049656	CLPTM1L
0.0299284	1.28081	12.8272	0.00169153	0.0924594	rDPI_50240	chr8	78591187	78591196	chr8:78591187..78591196,chr8:78591084..78591277,+;peak:chr8:78591187..78591188,+;peakCounts:390.3	2001	+	78591187	ENST00000518467.1	ENSG00000171033.13	alternative	ENSG00000171033	PKIA
0.0271437	1.35259	12.8249	0.00169284	0.0924594	rDPI_50243	chr8	78591258	78591265	chr8:78591258..78591265,chr8:78591084..78591277,+;peak:chr8:78591263..78591264,+;peakCounts:2390.3	4585	+	78591263	ENST00000518467.1	ENSG00000171033.13	alternative	ENSG00000171033	PKIA
-0.0220148	2.99105	12.8216	0.00169466	0.0924594	rDPI_15875	chr14	63728051	63728066	chr14:63728051..63728066,chr14:63727955..63728119,-;peak:chr14:63728055..63728056,-;peakCounts:1540.8	3193	-	63728055	ENST00000247225.7	ENSG00000126821.8	promoter	ENSG00000126821	SGPP1
-0.0223992	4.72386	12.8212	0.0016949	0.0924594	rDPI_17595	chr15	59657522	59657528	chr15:59657522..59657528,chr15:59657422..59657590,-;peak:chr15:59657526..59657527,-;peakCounts:5802.6	12880	-	59657526	ENST00000559706.1	ENSG00000140307.11	alternative	ENSG00000140307	GTF2A2
0.101681	5.90748	12.8124	0.00169992	0.0926034	rDPI_44527	chr6	31272092	31272093	chr6:31272092..31272093,chr6:31272058..31272173,-;peak:chr6:31272092..31272093,-;peakCounts:78895.8	87662	-	31272092	ENST00000484378.1	ENSG00000204525.17	promoter	ENSG00000204525	HLA-C
0.0246579	1.84674	12.8103	0.00170113	0.0926034	rDPI_12812	chr12	104138086	104138113	chr12:104138086..104138113,chr12:104137959..104138318,-;peak:chr12:104138091..104138092,-;peakCounts:116.2	1082	-	104138091	ENST00000551727.5	ENSG00000120837.8	alternative	ENSG00000120837	NFYB
-0.0392138	2.9669	12.8091	0.0017018	0.0926034	rDPI_24621	chr19	3466174	3466210	chr19:3466174..3466210,chr19:3465999..3466225,+;peak:chr19:3466178..3466179,+;peakCounts:261.9	2341	+	3466178	ENST00000589969.1	ENSG00000141905.19	promoter	ENSG00000141905	NFIC
0.0484342	4.89511	12.8026	0.00170547	0.092685	rDPI_4155	chr1	192809039	192809042	chr1:192809039..192809042,chr1:192809005..192809162,+;peak:chr1:192809039..192809040,+;peakCounts:6487.2	13314	+	192809039	ENST00000483295.1	ENSG00000116741.8	promoter	ENSG00000116741	RGS2
0.0656054	3.12752	12.8012	0.0017063	0.092685	rDPI_40440	chr4	119027119	119027125	chr4:119027119..119027125,chr4:119026892..119027434,+;peak:chr4:119027119..119027120,+;peakCounts:5392.8	6078	+	119027119	ENST00000627783.2	ENSG00000172403.11	alternative	ENSG00000172403	SYNPO2
0.0254073	3.8121	12.799	0.00170756	0.092685	rDPI_53668	chrX	15854783	15854789	chrX:15854783..15854789,chrX:15854725..15854885,-;peak:chrX:15854783..15854784,-;peakCounts:3715.5	7652	-	15854783	ENST00000479184.2	ENSG00000182287.15	alternative	ENSG00000182287	AP1S2
0.0367906	3.13952	12.7954	0.0017096	0.092719	rDPI_47124	chr7	30135001	30135015	chr7:30135001..30135015,chr7:30134921..30135171,+;peak:chr7:30135006..30135007,+;peakCounts:1937.2	5569	+	30135006	ENST00000409688.1	ENSG00000180354.16	alternative	ENSG00000180354	MTURN
-0.0289414	2.2006	12.7912	0.001712	0.0927721	rDPI_52877	chr9	129488701	129488714	chr9:129488701..129488714,chr9:129488598..129488935,+;peak:chr9:129488706..129488707,+;peakCounts:631.7	1198	+	129488706	ENST00000663000.1	ENSG00000204054.14	alternative	ENSG00000204054	NA
-0.0303319	2.30286	12.783	0.00171675	0.0928634	rDPI_27462	chr19	57584123	57584146	chr19:57584123..57584146,+	1892	+	57584145	ENST00000536878.6	ENSG00000171649.12	promoter	ENSG00000171649	ZIK1
0.0391832	1.77728	12.7814	0.00171763	0.0928634	rDPI_10757	chr12	460122	460144	chr12:460122..460144,chr12:459925..460233,+;peak:chr12:460138..460139,+;peakCounts:447.8	1951	+	460138	ENST00000266383.10	ENSG00000139044.12	enhancer	ENSG00000139044	B4GALNT3
-0.0318296	1.77977	12.7808	0.00171795	0.0928634	rDPI_21072	chr17	7884769	7884777	chr17:7884769..7884777,chr17:7884690..7884964,+;peak:chr17:7884772..7884773,+;peakCounts:401.6	1098	+	7884772	ENST00000380358.9	ENSG00000170004.17	alternative	ENSG00000170004	CHD3
-0.0276902	1.82609	12.7494	0.00173618	0.0936969	rDPI_20212	chr16	71884147	71884167	chr16:71884147..71884167,chr16:71884028..71884192,-;peak:chr16:71884161..71884162,-;peakCounts:230.9	657	-	71884161	ENST00000568666.5	ENSG00000102984.15	alternative	ENSG00000102984	ZNF821
-0.0376242	8.49542	12.7468	0.00173765	0.0936969	rDPI_37684	chr3	119677373	119677394	chr3:119677373..119677394,chr3:119677229..119677547,-;peak:chr3:119677378..119677379,-;peakCounts:44516.7	191298	-	119677378	ENST00000497116.1	ENSG00000138495.7	promoter	ENSG00000138495	COX17
-0.0289738	3.12841	12.7458	0.00173823	0.0936969	rDPI_27319	chr19	55259006	55259007	chr19:55259006..55259007,chr19:55258907..55259080,-;peak:chr19:55259006..55259007,-;peakCounts:2900.5	3492	-	55259006	ENST00000412770.7	ENSG00000105063.19	alternative	ENSG00000105063	PPP6R1
0.0380797	2.67312	12.7406	0.0017413	0.0936969	rDPI_52848	chr9	129028325	129028335	chr9:129028325..129028335,chr9:129028200..129028376,-;peak:chr9:129028331..129028332,-;peakCounts:774.8	2803	-	129028331	ENST00000372564.8	ENSG00000148341.18	alternative	ENSG00000148341	SH3GLB2
0.0256766	1.53063	12.7391	0.00174215	0.0936969	rDPI_31710	chr2	199851189	199851201	chr2:199851189..199851201,chr2:199851115..199851208,-;peak:chr2:199851192..199851193,-;peakCounts:199.3	535	-	199851192	ENST00000622774.2	ENSG00000226124.8	alternative	ENSG00000226124	FTCDNL1
0.0249713	1.20809	15.3836	0.00174339	0.0936969	rDPI_27050	chr19	49896876	49896922	chr19:49896876..49896922,-	609	-	49896886	ENST00000391826.7	ENSG00000104951.16	promoter	ENSG00000104951	IL4I1
0.0272317	2.49902	12.7317	0.0017465	0.0936969	rDPI_43385	chr5	154755341	154755366	chr5:154755341..154755366,chr5:154755220..154755513,+;peak:chr5:154755360..154755361,+;peakCounts:528.7	4096	+	154755360	ENST00000518297.6	ENSG00000155506.18	alternative	ENSG00000155506	LARP1
0.0724248	1.62573	12.7303	0.00174734	0.0936969	rDPI_37406	chr3	96617946	96617948	chr3:96617946..96617948,chr3:96617906..96617981,-;peak:chr3:96617947..96617948,-;peakCounts:119.2	494	-	96617947	ENST00000600213.3	ENSG00000269028.3	alternative	ENSG00000269028	MTRNR2L2
-0.0270242	2.8859	12.73	0.00174749	0.0936969	rDPI_45172	chr6	44219582	44219591	chr6:44219582..44219591,chr6:44219505..44219735,+;peak:chr6:44219586..44219587,+;peakCounts:1527	3297	+	44219586	ENST00000393844.7	ENSG00000112759.19	alternative	ENSG00000112759	SLC29A1
0.0505029	1.93067	12.7296	0.00174772	0.0936969	rDPI_4148	chr1	186680423	186680428	chr1:186680423..186680428,-	2557	-	186680423	ENST00000367468.10	ENSG00000073756.13	promoter	ENSG00000073756	PTGS2
0.0374493	2.8381	12.7241	0.00175096	0.0937263	rDPI_19249	chr16	22008108	22008125	chr16:22008108..22008125,chr16:22008080..22008213,+;peak:chr16:22008121..22008122,+;peakCounts:643.9	3638	+	22008121	ENST00000542527.7	ENSG00000185716.12	promoter	ENSG00000185716	MOSMO
-0.0305958	1.22521	12.7238	0.00175114	0.0937263	rDPI_1143	chr1	31670187	31670198	chr1:31670187..31670198,chr1:31670168..31670239,+;peak:chr1:31670192..31670193,+;peakCounts:529.2	738	+	31670192	ENST00000588288.1	ENSG00000235790.7	enhancer	ENSG00000235790	NA
0.0284279	1.29591	12.7194	0.00175373	0.093788	rDPI_24411	chr19	1132270	1132283	chr19:1132270..1132283,chr19:1132114..1132310,-;peak:chr19:1132274..1132275,-;peakCounts:189.8	505	-	1132274	ENST00000438103.6	ENSG00000064932.16	alternative	ENSG00000064932	SBNO2
-0.0253032	1.15247	16.8834	0.00175779	0.0938253	rDPI_22654	chr17	62381748	62381753	chr17:62381748..62381753,chr17:62381748..62381830,+;peak:chr17:62381748..62381749,+;peakCounts:119.5	270	+	62381748	ENST00000495438.1	ENSG00000239809.1	alternative	ENSG00000239809	NA
-0.0541365	6.71579	12.7112	0.00175854	0.0938253	rDPI_45583	chr6	89721155	89721156	chr6:89721155..89721156,+	36213	+	89721155	ENST00000438877.1	ENSG00000228124.1	enhancer	ENSG00000228124	NA
0.0326616	2.91198	12.7109	0.00175874	0.0938253	rDPI_24488	chr19	1652605	1652621	chr19:1652605..1652621,chr19:1652562..1652658,-;peak:chr19:1652614..1652615,-;peakCounts:1724.4	4419	-	1652614	ENST00000262965.12	ENSG00000071564.17	promoter	ENSG00000071564	TCF3
0.0212737	1.65795	14.8113	0.00176035	0.0938344	rDPI_43734	chr5	178730711	178730717	chr5:178730711..178730717,chr5:178730594..178730738,-;peak:chr5:178730716..178730717,-;peakCounts:605.5	901	-	178730716	ENST00000335815.7	ENSG00000169131.13	alternative	ENSG00000169131	ZNF354A
0.0281768	1.44088	12.7055	0.00176194	0.0938424	rDPI_40922	chr4	165207561	165207567	chr4:165207561..165207567,chr4:165207559..165207693,+;peak:chr4:165207561..165207562,+;peakCounts:427.8	760	+	165207561	ENST00000226725.11	ENSG00000109466.14	alternative	ENSG00000109466	KLHL2
-0.0405841	2.71388	12.703	0.00176337	0.0938424	rDPI_21150	chr17	10036767	10036774	chr17:10036767..10036774,chr17:10036451..10036881,-;peak:chr17:10036773..10036774,-;peakCounts:493.8	1958	-	10036773	ENST00000585266.5	ENSG00000007237.19	alternative	ENSG00000007237	GAS7
0.0348349	1.12256	12.6965	0.00176724	0.0939718	rDPI_35771	chr22	50532493	50532503	chr22:50532493..50532503,chr22:50532460..50532538,-;peak:chr22:50532497..50532498,-;peakCounts:301.5	857	-	50532497	ENST00000329363.8	ENSG00000177989.13	alternative	ENSG00000177989	ODF3B
-0.0297671	2.06878	12.6793	0.00177748	0.0944394	rDPI_29421	chr2	113235537	113235542	chr2:113235537..113235542,chr2:113235505..113235652,+;peak:chr2:113235537..113235538,+;peakCounts:497.2	1277	+	113235537	ENST00000333145.9	ENSG00000189223.15	alternative	ENSG00000189223	PAX8-AS1
-0.0246403	3.22786	12.6755	0.00177976	0.0944836	rDPI_25498	chr19	16324827	16324829	chr19:16324827..16324829,chr19:16324758..16324976,+;peak:chr19:16324828..16324829,+;peakCounts:3630.6	4132	+	16324828	ENST00000248071.6	ENSG00000127528.6	promoter	ENSG00000127528	KLF2
0.0390607	3.95218	12.6689	0.00178371	0.0946103	rDPI_49773	chr8	30812801	30812803	chr8:30812801..30812803,chr8:30812721..30812885,-;peak:chr8:30812801..30812802,-;peakCounts:5750.3	10387	-	30812801	ENST00000221138.9	ENSG00000104695.13	alternative	ENSG00000104695	PPP2CB
0.0748401	2.88264	12.6667	0.00178504	0.0946103	rDPI_23195	chr17	79022779	79022791	chr17:79022779..79022791,chr17:79022668..79023086,+;peak:chr17:79022784..79022785,+;peakCounts:559.9	1398	+	79022784	ENST00000578229.5	ENSG00000173918.15	alternative	ENSG00000173918	C1QTNF1
0.0376391	3.35955	12.6626	0.00178748	0.0946111	rDPI_21694	chr17	38705146	38705177	chr17:38705146..38705177,chr17:38705108..38705522,+;peak:chr17:38705169..38705170,+;peakCounts:2258.2	6695	+	38705169	ENST00000621332.5	ENSG00000275023.5	promoter	ENSG00000275023	MLLT6
-0.0293062	1.65553	12.6618	0.00178796	0.0946111	rDPI_37766	chr3	123201954	123201964	chr3:123201954..123201964,chr3:123201871..123201986,+;peak:chr3:123201959..123201960,+;peakCounts:772.2	2039	+	123201959	ENST00000473494.6	ENSG00000121542.12	promoter	ENSG00000121542	SEC22A
-0.0345518	2.5751	12.6481	0.00179623	0.0948351	rDPI_50676	chr8	119873817	119873834	chr8:119873817..119873834,chr8:119873683..119873924,+;peak:chr8:119873821..119873822,+;peakCounts:734.2	2130	+	119873821	ENST00000286234.6	ENSG00000155792.10	alternative	ENSG00000155792	DEPTOR
0.0364452	1.66383	12.6477	0.00179651	0.0948351	rDPI_4152	chr1	192575773	192575776	chr1:192575773..192575776,+	1475	+	192575773	ENST00000462589.1	ENSG00000090104.12	promoter	ENSG00000090104	RGS1
-0.0246958	1.19653	14.2275	0.00179662	0.0948351	rDPI_12304	chr12	62965357	62965367	chr12:62965357..62965367,chr12:62965357..62965430,+;peak:chr12:62965362..62965363,+;peakCounts:263.6	600	+	62965362	ENST00000484568.1	ENSG00000139239.7	alternative	ENSG00000139239	RPL14P1
-0.0292789	1.35233	12.6436	0.00179894	0.0948351	rDPI_35571	chr22	42631420	42631433	chr22:42631420..42631433,chr22:42631388..42631454,-;peak:chr22:42631427..42631428,-;peakCounts:173.7	316	-	42631427	ENST00000470741.1	ENSG00000100243.21	enhancer	ENSG00000100243	CYB5R3
-0.0282112	1.9166	12.6428	0.00179945	0.0948351	rDPI_18037	chr15	74782126	74782128	chr15:74782126..74782128,chr15:74782019..74782190,+;peak:chr15:74782126..74782127,+;peakCounts:619.3	777	+	74782126	ENST00000439220.6	ENSG00000103653.16	alternative	ENSG00000103653	CSK
0.0331286	1.96413	12.6359	0.00180365	0.0949331	rDPI_25249	chr19	12775548	12775553	chr19:12775548..12775553,chr19:12775465..12775601,-;peak:chr19:12775552..12775553,-;peakCounts:4128.3	4787	-	12775552	ENST00000397668.8	ENSG00000095066.12	alternative	ENSG00000095066	HOOK2
0.0394485	2.62386	12.6349	0.00180422	0.0949331	rDPI_48726	chr7	129952886	129952891	chr7:129952886..129952891,chr7:129952515..129953011,-;peak:chr7:129952886..129952887,-;peakCounts:7840.2	9695	-	129952886	ENST00000472396.5	ENSG00000186591.13	alternative	ENSG00000186591	UBE2H
0.0258338	4.34418	12.6296	0.00180744	0.0949636	rDPI_25412	chr19	14433345	14433362	chr19:14433345..14433362,chr19:14433275..14433526,+;peak:chr19:14433348..14433349,+;peakCounts:5122.7	20977	+	14433348	ENST00000585839.5	ENSG00000123143.13	promoter	ENSG00000123143	PKN1
-0.0332322	5.34943	12.6292	0.00180771	0.0949636	rDPI_44469	chr6	30617854	30617861	chr6:30617854..30617861,chr6:30617785..30617924,+;peak:chr6:30617856..30617857,+;peakCounts:9608	23226	+	30617856	ENST00000472229.1	ENSG00000204568.12	alternative	ENSG00000204568	MRPS18B
-0.0457059	4.35972	12.6254	0.00181001	0.0950083	rDPI_14828	chr14	23385000	23385016	chr14:23385000..23385016,chr14:23384914..23385066,-;peak:chr14:23385007..23385008,-;peakCounts:1154.8	5157	-	23385007	ENST00000651452.1	ENSG00000197616.13	alternative	ENSG00000197616	MYH6
0.0384596	2.57045	12.6203	0.00181313	0.0950795	rDPI_47524	chr7	65873244	65873267	chr7:65873244..65873267,chr7:65873074..65873434,+;peak:chr7:65873258..65873259,+;peakCounts:1096.2	4217	+	65873258	ENST00000648179.1	ENSG00000196715.7	alternative	ENSG00000196715	VKORC1L1
-0.0269633	4.11208	12.6184	0.00181428	0.0950795	rDPI_46971	chr7	21945872	21945889	chr7:21945872..21945889,chr7:21945794..21945954,-;peak:chr7:21945881..21945882,-;peakCounts:1891.7	7554	-	21945881	ENST00000356195.9	ENSG00000164649.20	promoter	ENSG00000164649	CDCA7L
0.0347316	1.45082	12.6141	0.00181693	0.095142	rDPI_22905	chr17	73645219	73645249	chr17:73645219..73645249,chr17:73645154..73645271,-;peak:chr17:73645242..73645243,-;peakCounts:223.2	880	-	73645242	ENST00000392650.8	ENSG00000069188.17	enhancer	ENSG00000069188	SDK2
0.0304144	1.54855	12.6098	0.00181956	0.0951427	rDPI_10496	chr11	119340459	119340465	chr11:119340459..119340465,chr11:119340422..119340622,-;peak:chr11:119340459..119340460,-;peakCounts:827.1	956	-	119340459	ENST00000530681.2	ENSG00000223953.6	alternative	ENSG00000223953	C1QTNF5
-0.0302798	1.92285	12.6077	0.00182084	0.0951427	rDPI_22764	chr17	65100823	65100843	chr17:65100823..65100843,chr17:65100774..65100930,+;peak:chr17:65100827..65100828,+;peakCounts:196.7	767	+	65100827	ENST00000637818.1	ENSG00000108370.17	alternative	ENSG00000108370	RGS9
0.0211139	5.593	12.6069	0.00182132	0.0951427	rDPI_23303	chr17	81703444	81703461	chr17:81703444..81703461,chr17:81703310..81703568,+;peak:chr17:81703449..81703450,+;peakCounts:6249.5	30985	+	81703449	ENST00000571730.1	ENSG00000262660.1	alternative	ENSG00000262660	NA
0.0224415	3.49634	12.5996	0.00182579	0.0952253	rDPI_48984	chr7	143381311	143381319	chr7:143381311..143381319,chr7:143381270..143381428,+;peak:chr7:143381315..143381316,+;peakCounts:1282	7181	+	143381315	ENST00000449630.5	ENSG00000159840.16	alternative	ENSG00000159840	ZYX
-0.0353357	1.93665	12.5984	0.00182654	0.0952253	rDPI_12386	chr12	68348561	68348571	chr12:68348561..68348571,chr12:68348525..68348615,-;peak:chr12:68348565..68348566,-;peakCounts:161.1	321	-	68348565	ENST00000653144.1	ENSG00000251301.7	alternative	ENSG00000251301	LINC02384
0.03365	5.20714	12.5972	0.00182727	0.0952253	rDPI_24592	chr19	3062555	3062564	chr19:3062555..3062564,chr19:3062179..3062667,-;peak:chr19:3062560..3062561,-;peakCounts:10962.4	22926	-	3062560	ENST00000327141.9	ENSG00000104964.15	alternative	ENSG00000104964	TLE5
-0.0337847	3.17849	12.5926	0.00183013	0.0952363	rDPI_5568	chr10	10796824	10796849	chr10:10796824..10796849,chr10:10796764..10796863,+;peak:chr10:10796839..10796840,+;peakCounts:405	2634	+	10796839	ENST00000637215.1	ENSG00000048740.18	not_classified	ENSG00000048740	CELF2
-0.0468807	3.36057	12.59	0.0018317	0.0952363	rDPI_16551	chr14	102084932	102084998	chr14:102084932..102084998,chr14:102084732..102085001,-;peak:chr14:102084989..102084990,-;peakCounts:333.9	3453	-	102084989	ENST00000560130.1	ENSG00000080824.19	enhancer	ENSG00000080824	HSP90AA1
-0.0275314	2.04411	12.5898	0.00183186	0.0952363	rDPI_27099	chr19	51353154	51353169	chr19:51353154..51353169,chr19:51353138..51353297,-;peak:chr19:51353163..51353164,-;peakCounts:585.9	1267	-	51353163	ENST00000354232.8	ENSG00000105379.10	enhancer	ENSG00000105379	ETFB
-0.0360822	1.71378	12.5813	0.00183714	0.0953609	rDPI_24379	chr19	860869	860881	chr19:860869..860881,chr19:860863..861001,+;peak:chr19:860869..860870,+;peakCounts:340.2	831	+	860869	ENST00000327726.11	ENSG00000197766.8	alternative	ENSG00000197766	CFD
-0.0229911	2.53616	12.5808	0.00183741	0.0953609	rDPI_29134	chr2	96208302	96208317	chr2:96208302..96208317,chr2:96208239..96208437,-;peak:chr2:96208307..96208308,-;peakCounts:612.9	2963	-	96208307	ENST00000488084.1	ENSG00000084090.14	alternative	ENSG00000084090	STARD7
-0.0333108	1.61822	12.5788	0.00183864	0.0953609	rDPI_48280	chr7	103141720	103141732	chr7:103141720..103141732,chr7:103141708..103141759,-;peak:chr7:103141727..103141728,-;peakCounts:456.3	1045	-	103141727	ENST00000432746.1	ENSG00000224415.1	alternative	ENSG00000224415	NA
-0.0247126	5.14907	12.5756	0.00184062	0.095388	rDPI_26807	chr19	47515029	47515045	chr19:47515029..47515045,chr19:47514879..47515123,-;peak:chr19:47515040..47515041,-;peakCounts:4319.1	13989	-	47515040	ENST00000601208.5	ENSG00000105402.8	promoter	ENSG00000105402	NAPA
0.0387029	5.02095	12.5717	0.00184307	0.0954206	rDPI_24078	chr18	54224500	54224547	chr18:54224500..54224547,chr18:54224287..54224730,-;peak:chr18:54224519..54224520,-;peakCounts:2143.8	17798	-	54224519	ENST00000583046.1	ENSG00000134046.12	promoter	ENSG00000134046	MBD2
-0.0242912	2.10823	12.5699	0.00184417	0.0954206	rDPI_2179	chr1	85048486	85048507	chr1:85048486..85048507,chr1:85048438..85048568,-;peak:chr1:85048494..85048495,-;peakCounts:196.2	684	-	85048494	ENST00000370589.7	ENSG00000055732.13	promoter	ENSG00000055732	MCOLN3
0.0397476	3.66107	12.5629	0.00184854	0.0954745	rDPI_1243	chr1	33349772	33349778	chr1:33349772..33349778,chr1:33349606..33349958,-;peak:chr1:33349772..33349773,-;peakCounts:1415.6	5298	-	33349772	ENST00000493483.5	ENSG00000134686.18	alternative	ENSG00000134686	PHC2
-0.0387919	1.89394	12.5613	0.00184952	0.0954745	rDPI_19656	chr16	46740132	46740143	chr16:46740132..46740143,chr16:46740053..46740171,-;peak:chr16:46740137..46740138,-;peakCounts:290.8	529	-	46740137	ENST00000564731.5	ENSG00000140795.13	enhancer	ENSG00000140795	MYLK3
0.0252016	1.46053	12.5612	0.0018496	0.0954745	rDPI_19406	chr16	29806314	29806329	chr16:29806314..29806329,chr16:29806304..29806432,+;peak:chr16:29806317..29806318,+;peakCounts:154.8	1276	+	29806317	ENST00000322945.11	ENSG00000103495.14	alternative	ENSG00000103495	MAZ
-0.0249984	1.20786	12.5492	0.00185709	0.0957853	rDPI_47210	chr7	35202346	35202352	chr7:35202346..35202352,chr7:35202297..35202386,-;peak:chr7:35202351..35202352,-;peakCounts:193.5	238	-	35202351	ENST00000454445.1	ENSG00000189212.12	enhancer	ENSG00000189212	NA
-0.0266014	3.40735	12.5451	0.00185966	0.0958422	rDPI_20020	chr16	67109938	67109949	chr16:67109938..67109949,chr16:67109900..67109998,+;peak:chr16:67109943..67109944,+;peakCounts:1513.8	4758	+	67109943	ENST00000219139.8	ENSG00000125149.12	promoter	ENSG00000125149	C16orf70
-0.0276181	1.13053	12.5395	0.00186318	0.0959479	rDPI_6692	chr10	86756730	86756735	chr10:86756730..86756735,chr10:86756720..86756837,+;peak:chr10:86756732..86756733,+;peakCounts:111.6	429	+	86756732	ENST00000372037.8	ENSG00000107779.14	alternative	ENSG00000107779	BMPR1A
-0.0552476	2.9583	12.5312	0.00186845	0.0960922	rDPI_6459	chr10	73576337	73576338	chr10:73576337..73576338,chr10:73576291..73576356,-;peak:chr10:73576337..73576338,-;peakCounts:2106	2340	-	73576337	ENST00000498143.5	ENSG00000166348.19	promoter	ENSG00000166348	USP54
0.0313774	2.33222	12.5304	0.00186893	0.0960922	rDPI_37940	chr3	129121792	129121805	chr3:129121792..129121805,chr3:129121752..129121832,-;peak:chr3:129121804..129121805,-;peakCounts:1291.5	2102	-	129121804	ENST00000393304.5	ENSG00000172780.17	promoter	ENSG00000172780	RAB43
0.0277157	3.73786	12.5279	0.0018705	0.0960975	rDPI_34170	chr21	15729949	15729974	chr21:15729949..15729974,chr21:15729891..15730170,+;peak:chr21:15729963..15729964,+;peakCounts:2842.1	12813	+	15729963	ENST00000285679.10	ENSG00000155313.15	promoter	ENSG00000155313	USP25
0.0425617	4.28725	12.5194	0.00187587	0.0962978	rDPI_16512	chr14	100375346	100375353	chr14:100375346..100375353,chr14:100375301..100375653,-;peak:chr14:100375346..100375347,-;peakCounts:14611.5	32422	-	100375346	ENST00000392882.7	ENSG00000140105.18	promoter	ENSG00000140105	WARS1
-0.0446708	1.90972	12.5171	0.00187736	0.0962982	rDPI_14881	chr14	23390096	23390107	chr14:23390096..23390107,chr14:23390009..23390123,-;peak:chr14:23390104..23390105,-;peakCounts:202.5	1016	-	23390104	ENST00000362287.2	ENSG00000199157.2	alternative	ENSG00000199157	MIR208A
0.0308632	7.65451	12.5138	0.00187945	0.0963299	rDPI_17276	chr15	43746433	43746439	chr15:43746433..43746439,chr15:43746326..43746465,+;peak:chr15:43746438..43746439,+;peakCounts:106329.6	123969	+	43746438	ENST00000300289.10	ENSG00000167004.13	promoter	ENSG00000167004	PDIA3
-0.0312783	4.22822	12.5066	0.00188406	0.0964903	rDPI_23982	chr18	47150466	47150481	chr18:47150466..47150481,chr18:47150382..47150540,-;peak:chr18:47150470..47150471,-;peakCounts:1272.4	7522	-	47150470	ENST00000587841.5	ENSG00000167220.12	alternative	ENSG00000167220	HDHD2
0.028151	3.04923	12.5031	0.00188627	0.096524	rDPI_8929	chr11	59615766	59615777	chr11:59615766..59615777,chr11:59615668..59615906,-;peak:chr11:59615771..59615772,-;peakCounts:2907	5579	-	59615771	ENST00000263847.6	ENSG00000110048.12	alternative	ENSG00000110048	OSBP
0.0276127	1.53408	12.4998	0.00188835	0.096524	rDPI_19810	chr16	56425549	56425552	chr16:56425549..56425552,chr16:56425406..56425614,-;peak:chr16:56425551..56425552,-;peakCounts:132.6	768	-	56425551	ENST00000290649.10	ENSG00000159461.15	alternative	ENSG00000159461	AMFR
0.0314517	2.47084	12.4957	0.00189097	0.096524	rDPI_19707	chr16	48610189	48610200	chr16:48610189..48610200,chr16:48610156..48610272,-;peak:chr16:48610194..48610195,-;peakCounts:950.9	3036	-	48610194	ENST00000262384.4	ENSG00000102921.8	promoter	ENSG00000102921	N4BP1
-0.0383284	5.80146	12.4947	0.00189163	0.096524	rDPI_48064	chr7	98386594	98386608	chr7:98386594..98386608,-	25774	-	98386607	ENST00000398259.2	ENSG00000214389.2	promoter	ENSG00000214389	RPS3AP26
0.025914	1.12506	24.6021	0.00189286	0.096524	rDPI_20694	chr17	2853456	2853466	chr17:2853456..2853466,chr17:2853371..2853621,+;peak:chr17:2853461..2853462,+;peakCounts:121.1	483	+	2853461	ENST00000542807.1	ENSG00000132359.15	alternative	ENSG00000132359	RAP1GAP2
0.028205	3.81813	12.4917	0.00189358	0.096524	rDPI_35705	chr22	46577114	46577153	chr22:46577114..46577153,chr22:46577036..46577268,+;peak:chr22:46577117..46577118,+;peakCounts:1078.3	9295	+	46577117	ENST00000431155.1	ENSG00000075240.17	promoter	ENSG00000075240	GRAMD4
0.0302993	3.55565	12.4883	0.00189572	0.0965315	rDPI_23388	chr17	82458736	82458742	chr17:82458736..82458742,chr17:82458627..82458778,+;peak:chr17:82458741..82458742,+;peakCounts:5924.7	7063	+	82458741	ENST00000309794.16	ENSG00000141562.18	promoter	ENSG00000141562	NARF
-0.0369329	3.86073	12.4868	0.00189669	0.0965315	rDPI_46972	chr7	21945891	21945905	chr7:21945891..21945905,chr7:21945794..21945954,-;peak:chr7:21945899..21945900,-;peakCounts:3440.7	6890	-	21945899	ENST00000406877.8	ENSG00000164649.20	alternative	ENSG00000164649	CDCA7L
0.0489135	2.35282	12.4799	0.00190112	0.0965824	rDPI_7650	chr10	123891802	123891813	chr10:123891802..123891813,chr10:123891719..123891849,-;peak:chr10:123891807..123891808,-;peakCounts:807.2	1316	-	123891807	ENST00000241305.4	ENSG00000121898.13	alternative	ENSG00000121898	CPXM2
-0.0274045	3.06541	12.4797	0.00190126	0.0965824	rDPI_51124	chr8	144827553	144827566	chr8:144827553..144827566,chr8:144827515..144827610,+;peak:chr8:144827561..144827562,+;peakCounts:1146.6	3932	+	144827561	ENST00000532382.5	ENSG00000147789.15	promoter	ENSG00000147789	ZNF7
-0.0238395	1.47375	12.4783	0.00190213	0.0965824	rDPI_15013	chr14	23405303	23405304	chr14:23405303..23405304,chr14:23405226..23405397,-;peak:chr14:23405303..23405304,-;peakCounts:63.9	286	-	23405303	ENST00000557461.2	ENSG00000197616.13	alternative	ENSG00000197616	MYH6
0.0284248	2.62583	12.473	0.00190556	0.0966814	rDPI_38477	chr3	168095595	168095609	chr3:168095595..168095609,chr3:168095242..168095997,-;peak:chr3:168095603..168095604,-;peakCounts:3704.4	5859	-	168095603	ENST00000309027.4	ENSG00000173905.9	alternative	ENSG00000173905	GOLIM4
-0.0251257	3.95091	12.4702	0.00190736	0.096698	rDPI_33289	chr20	35699374	35699378	chr20:35699374..35699378,chr20:35699339..35699492,+;peak:chr20:35699374..35699375,+;peakCounts:1085.8	10665	+	35699374	ENST00000374077.8	ENSG00000125995.16	alternative	ENSG00000125995	ROMO1
-0.0360086	1.90951	12.4581	0.00191519	0.0969044	rDPI_44294	chr6	26157889	26157892	chr6:26157889..26157892,-	580	-	26157891	ENST00000635439.1	ENSG00000283064.1	promoter	ENSG00000283064	NA
-0.035855	5.19754	12.4562	0.00191642	0.0969044	rDPI_53522	chrM	14583	14594	chrM:14583..14594,chrM:12378..16083,-;peak:chrM:14588..14589,-;peakCounts:9890.1	16699	-	14588	ENST00000361681.2	ENSG00000198695.2	alternative	ENSG00000198695	ND6
0.0307661	2.13058	12.4556	0.00191685	0.0969044	rDPI_53259	chr9	137459353	137459355	chr9:137459353..137459355,chr9:137459291..137459363,-;peak:chr9:137459354..137459355,-;peakCounts:441.9	1068	-	137459354	ENST00000371475.9	ENSG00000165802.23	alternative	ENSG00000165802	NSMF
-0.0298863	6.24535	12.4548	0.00191737	0.0969044	rDPI_45755	chr6	110874779	110874881	chr6:110874779..110874881,chr6:110874779..110874881,+	53911	+	110874785	ENST00000368882.8	ENSG00000123505.19	promoter	ENSG00000123505	AMD1
0.134141	4.20814	12.4438	0.00192451	0.0971899	rDPI_44689	chr6	32589805	32589806	chr6:32589805..32589806,chr6:32589734..32589850,-;peak:chr6:32589805..32589806,-;peakCounts:23565.6	26184	-	32589805	ENST00000360004.5	ENSG00000196126.11	promoter	ENSG00000196126	HLA-DRB1
-0.0271477	1.22315	12.4405	0.00192666	0.0972232	rDPI_7000	chr10	96750566	96750578	chr10:96750566..96750578,chr10:96750518..96750591,+;peak:chr10:96750572..96750573,+;peakCounts:263.7	643	+	96750572	ENST00000439189.1	ENSG00000236552.2	alternative	ENSG00000236552	RPL13AP5
0.0276849	3.9599	12.4359	0.00192967	0.0973002	rDPI_47201	chr7	35037437	35037462	chr7:35037437..35037462,chr7:35037365..35037527,-;peak:chr7:35037450..35037451,-;peakCounts:4043.7	9875	-	35037450	ENST00000638088.2	ENSG00000173852.15	promoter	ENSG00000173852	DPY19L1
-0.029228	4.35118	12.4293	0.00193399	0.0974427	rDPI_2617	chr1	111619824	111619833	chr1:111619824..111619833,chr1:111619712..111620007,+;peak:chr1:111619828..111619829,+;peakCounts:3967.3	9089	+	111619828	ENST00000369709.3	ENSG00000116473.14	alternative	ENSG00000116473	RAP1A
-0.0311534	1.92082	12.4246	0.00193707	0.0975114	rDPI_34785	chr22	21001759	21001766	chr22:21001759..21001766,chr22:21001684..21001848,-;peak:chr22:21001762..21001763,-;peakCounts:407.1	746	-	21001762	ENST00000498406.1	ENSG00000184436.12	alternative	ENSG00000184436	THAP7
0.0251148	2.15461	12.4227	0.00193834	0.0975114	rDPI_53682	chrX	17737483	17737499	chrX:17737483..17737499,chrX:17737441..17737614,+;peak:chrX:17737488..17737489,+;peakCounts:660.6	1643	+	17737488	ENST00000380041.8	ENSG00000047634.15	promoter	ENSG00000047634	SCML1
0.0391539	1.7239	12.4163	0.00194252	0.0975716	rDPI_10061	chr11	94795134	94795141	chr11:94795134..94795141,chr11:94794911..94795153,+;peak:chr11:94795136..94795137,+;peakCounts:150.4	440	+	94795136	ENST00000539727.1	ENSG00000166025.18	alternative	ENSG00000166025	AMOTL1
-0.0283306	1.50542	12.4163	0.00194253	0.0975716	rDPI_35116	chr22	32474710	32474714	chr22:32474710..32474714,chr22:32474660..32474857,+;peak:chr22:32474710..32474711,+;peakCounts:192.2	798	+	32474710	ENST00000420700.5	ENSG00000100225.18	alternative	ENSG00000100225	FBXO7
0.0372945	3.35574	12.4083	0.0019478	0.0977273	rDPI_51829	chr9	75890673	75890677	chr9:75890673..75890677,chr9:75890638..75890710,+;peak:chr9:75890673..75890674,+;peakCounts:3582.9	7052	+	75890673	ENST00000674117.1	ENSG00000099139.14	promoter	ENSG00000099139	PCSK5
0.0267104	4.57728	12.4051	0.0019499	0.0977273	rDPI_43657	chr5	176416554	176416563	chr5:176416554..176416563,chr5:176416177..176416596,-;peak:chr5:176416558..176416559,-;peakCounts:5532.3	20781	-	176416558	ENST00000310418.9	ENSG00000175416.16	alternative	ENSG00000175416	CLTB
-0.0425857	4.75966	12.4029	0.00195138	0.0977273	rDPI_4293	chr1	201373251	201373273	chr1:201373251..201373273,chr1:201373126..201373416,-;peak:chr1:201373267..201373268,-;peakCounts:2987.5	12527	-	201373267	ENST00000236918.11	ENSG00000118194.20	alternative	ENSG00000118194	TNNT2
0.0300119	1.93206	12.4014	0.00195234	0.0977273	rDPI_36149	chr3	20040235	20040260	chr3:20040235..20040260,chr3:20040218..20040658,+;peak:chr3:20040254..20040255,+;peakCounts:285.7	2283	+	20040254	ENST00000263754.5	ENSG00000114166.8	alternative	ENSG00000114166	KAT2B
-0.0237178	6.75612	12.398	0.00195462	0.0977273	rDPI_48130	chr7	100088976	100088983	chr7:100088976..100088983,chr7:100088930..100089058,+;peak:chr7:100088978..100088979,+;peakCounts:36054.9	68609	+	100088978	ENST00000418625.5	ENSG00000168090.10	promoter	ENSG00000168090	COPS6
0.0454421	7.23217	12.3947	0.0019568	0.0977273	rDPI_51738	chr9	68975689	68975934	chr9:68975689..68975934,chr9:68975689..68975934,-	143555	-	68975843	ENST00000377276.5	ENSG00000165059.8	enhancer	ENSG00000165059	PRKACG
0.0302092	1.76111	12.3945	0.00195692	0.0977273	rDPI_11664	chr12	48789086	48789090	chr12:48789086..48789090,chr12:48788881..48789132,-;peak:chr12:48789089..48789090,-;peakCounts:1258.6	1755	-	48789089	ENST00000357869.8	ENSG00000174233.12	alternative	ENSG00000174233	ADCY6
0.0299908	2.45549	12.3916	0.00195886	0.0977273	rDPI_38868	chr3	194486709	194486750	chr3:194486709..194486750,chr3:194486575..194486752,-;peak:chr3:194486731..194486732,-;peakCounts:211.5	1519	-	194486731	ENST00000645319.2	ENSG00000133657.16	alternative	ENSG00000133657	ATP13A3
0.0495523	4.47914	12.3881	0.00196117	0.0977273	rDPI_23552	chr18	8609470	8609485	chr18:8609470..8609485,chr18:8609371..8609952,+;peak:chr18:8609481..8609482,+;peakCounts:10222.1	27477	+	8609481	ENST00000329286.7	ENSG00000206418.4	alternative	ENSG00000206418	RAB12
-0.0255673	2.41411	12.3869	0.00196198	0.0977273	rDPI_39451	chr4	39638930	39638943	chr4:39638930..39638943,chr4:39638831..39639089,-;peak:chr4:39638935..39638936,-;peakCounts:334.6	1307	-	39638935	ENST00000505729.1	ENSG00000163683.12	alternative	ENSG00000163683	SMIM14
0.034406	1.42764	12.3864	0.0019623	0.0977273	rDPI_52345	chr9	111897163	111897173	chr9:111897163..111897173,chr9:111897048..111897251,+;peak:chr9:111897167..111897168,+;peakCounts:639	1125	+	111897167	ENST00000489355.1	ENSG00000148154.10	alternative	ENSG00000148154	UGCG
0.0206504	3.88156	12.3845	0.0019636	0.0977273	rDPI_43994	chr6	7313180	7313187	chr6:7313180..7313187,chr6:7313103..7313335,-;peak:chr6:7313182..7313183,-;peakCounts:934.5	6271	-	7313182	ENST00000479365.5	ENSG00000124783.14	alternative	ENSG00000124783	SSR1
-0.0341161	1.54012	12.3823	0.00196508	0.0977273	rDPI_2488	chr1	109100386	109100387	chr1:109100386..109100387,+	455	+	109100386	ENST00000458748.1	ENSG00000278249.1	alternative	ENSG00000278249	SCARNA2
0.0324702	5.66298	12.3765	0.00196894	0.0977557	rDPI_22683	chr17	63622410	63622441	chr17:63622410..63622441,chr17:63622336..63622645,+;peak:chr17:63622417..63622418,+;peakCounts:5971.5	34065	+	63622417	ENST00000579585.5	ENSG00000198909.8	promoter	ENSG00000198909	MAP3K3
-0.0241011	1.54598	12.3759	0.00196935	0.0977557	rDPI_1402	chr1	39214396	39214402	chr1:39214396..39214402,chr1:39214203..39214418,+;peak:chr1:39214401..39214402,+;peakCounts:351	479	+	39214401	ENST00000480624.5	ENSG00000127603.30	alternative	ENSG00000127603	MACF1
0.029761	3.04354	12.3736	0.00197089	0.0977557	rDPI_35704	chr22	46577088	46577103	chr22:46577088..46577103,chr22:46577036..46577268,+;peak:chr22:46577097..46577098,+;peakCounts:2265.3	4869	+	46577097	ENST00000431155.1	ENSG00000075240.17	alternative	ENSG00000075240	GRAMD4
-0.0399573	2.82167	12.3725	0.00197164	0.0977557	rDPI_12618	chr12	93083714	93083718	chr12:93083714..93083718,-	1828	-	93083716	ENST00000536425.1	ENSG00000256393.1	promoter	ENSG00000256393	NA
0.0455563	2.2668	12.3624	0.00197837	0.0979905	rDPI_39748	chr4	70666503	70666514	chr4:70666503..70666514,chr4:70666495..70666565,-;peak:chr4:70666508..70666509,-;peakCounts:1270.8	1757	-	70666508	ENST00000254801.9	ENSG00000132465.12	promoter	ENSG00000132465	JCHAIN
-0.0469262	3.34823	12.3609	0.00197938	0.0979905	rDPI_21776	chr17	39665955	39665966	chr17:39665955..39665966,chr17:39665714..39666514,+;peak:chr17:39665960..39665961,+;peakCounts:1499.1	9318	+	39665960	ENST00000309889.3	ENSG00000173991.6	alternative	ENSG00000173991	TCAP
-0.0371728	6.17837	12.3446	0.00199039	0.0984612	rDPI_14871	chr14	23389447	23389455	chr14:23389447..23389455,chr14:23389258..23389515,-;peak:chr14:23389453..23389454,-;peakCounts:9558	21587	-	23389453	ENST00000362287.2	ENSG00000199157.2	not_classified	ENSG00000199157	MIR208A
0.0429521	2.08117	12.3358	0.00199634	0.098598	rDPI_49303	chr8	6563245	6563253	chr8:6563245..6563253,chr8:6563160..6563282,-;peak:chr8:6563245..6563246,-;peakCounts:654.3	1204	-	6563245	ENST00000629816.3	ENSG00000091879.14	promoter	ENSG00000091879	ANGPT2
0.0438663	5.55044	12.3351	0.00199683	0.098598	rDPI_35104	chr22	31944528	31944543	chr22:31944528..31944543,chr22:31944383..31944816,+;peak:chr22:31944535..31944536,+;peakCounts:14251.5	27496	+	31944535	ENST00000248975.6	ENSG00000128245.15	promoter	ENSG00000128245	YWHAH
-0.027423	1.66167	12.3279	0.00200174	0.098598	rDPI_48236	chr7	101240209	101240222	chr7:101240209..101240222,chr7:101240148..101240253,-;peak:chr7:101240216..101240217,-;peakCounts:394.2	650	-	101240216	ENST00000463406.5	ENSG00000214253.9	enhancer	ENSG00000214253	FIS1
0.0714232	3.42985	12.3272	0.00200218	0.098598	rDPI_48219	chr7	101127103	101127105	chr7:101127103..101127105,chr7:101127074..101127238,+;peak:chr7:101127104..101127105,+;peakCounts:10083.6	11378	+	101127104	ENST00000223095.5	ENSG00000106366.9	promoter	ENSG00000106366	SERPINE1
0.0313498	3.32555	12.3262	0.00200285	0.098598	rDPI_37813	chr3	124887267	124887279	chr3:124887267..124887279,chr3:124887132..124887690,-;peak:chr3:124887273..124887274,-;peakCounts:1895.5	5640	-	124887273	ENST00000296181.9	ENSG00000082781.12	alternative	ENSG00000082781	ITGB5
-0.0303856	2.14838	12.324	0.0020044	0.098598	rDPI_36973	chr3	51960864	51960867	chr3:51960864..51960867,-	1740	-	51960864	ENST00000497390.5	ENSG00000090097.22	enhancer	ENSG00000090097	PCBP4
-0.0253691	1.38421	12.3228	0.00200519	0.098598	rDPI_45925	chr6	123366150	123366171	chr6:123366150..123366171,-	250	-	123366150	ENST00000361029.8	ENSG00000186439.14	enhancer	ENSG00000186439	TRDN
-0.0527666	4.87804	12.3226	0.00200533	0.098598	rDPI_53412	chrM	7828	7835	chrM:7828..7835,chrM:7735..7914,+;peak:chrM:7831..7832,+;peakCounts:7112	17520	+	7831	ENST00000361739.1	ENSG00000198712.1	alternative	ENSG00000198712	COX2
0.0225189	3.15413	12.3193	0.00200759	0.098598	rDPI_40370	chr4	112231782	112231797	chr4:112231782..112231797,chr4:112231716..112231853,+;peak:chr4:112231787..112231788,+;peakCounts:2943	6610	+	112231787	ENST00000274000.10	ENSG00000138660.12	promoter	ENSG00000138660	AP1AR
-0.0393957	3.43948	12.3183	0.00200826	0.098598	rDPI_829	chr1	23693878	23693887	chr1:23693878..23693887,chr1:23693805..23693908,+;peak:chr1:23693879..23693880,+;peakCounts:880.8	3813	+	23693879	ENST00000482370.2	ENSG00000142676.14	alternative	ENSG00000142676	RPL11
0.03737	7.4683	12.3123	0.00201237	0.0987258	rDPI_33976	chr20	63520765	63520768	chr20:63520765..63520768,chr20:63520714..63520885,+;peak:chr20:63520765..63520766,+;peakCounts:158380.2	182292	+	63520765	ENST00000464438.1	ENSG00000125534.10	promoter	ENSG00000125534	PPDPF
-0.0223916	1.52358	12.3086	0.00201491	0.0987758	rDPI_10861	chr12	4301641	4301650	chr12:4301641..4301650,chr12:4301563..4301671,+;peak:chr12:4301649..4301650,+;peakCounts:232.2	382	+	4301649	ENST00000635110.1	ENSG00000078237.7	alternative	ENSG00000078237	TIGAR
-0.0355104	1.44071	12.3041	0.00201796	0.0987927	rDPI_40125	chr4	90838962	90838965	chr4:90838962..90838965,-	835	-	90838962	ENST00000402089.4	ENSG00000187653.11	alternative	ENSG00000187653	NA
-0.0250258	1.97189	12.2999	0.00202087	0.0987927	rDPI_44136	chr6	14431976	14431983	chr6:14431976..14431983,chr6:14431851..14432028,+;peak:chr6:14431982..14431983,+;peakCounts:247.4	698	+	14431982	ENST00000666857.1	ENSG00000286277.1	alternative	ENSG00000286277	NA
-0.0440801	10.977	12.2997	0.00202101	0.0987927	rDPI_14114	chr13	45341183	45341192	chr13:45341183..45341192,chr13:45341017..45341361,-;peak:chr13:45341183..45341184,-;peakCounts:368111.7	679024	-	45341183	ENST00000530705.6	ENSG00000133112.17	promoter	ENSG00000133112	TPT1
0.0420395	4.0534	12.2979	0.00202227	0.0987927	rDPI_46542	chr6	163414788	163414799	chr6:163414788..163414799,chr6:163414592..163415335,+;peak:chr6:163414793..163414794,+;peakCounts:4680.4	18933	+	163414793	ENST00000361752.8	ENSG00000112531.17	alternative	ENSG00000112531	QKI
0.0537849	5.23655	12.2971	0.00202282	0.0987927	rDPI_12568	chr12	91111434	91111443	chr12:91111434..91111443,chr12:91111402..91111534,-;peak:chr12:91111438..91111439,-;peakCounts:7218.3	16124	-	91111438	ENST00000546642.1	ENSG00000139329.5	alternative	ENSG00000139329	LUM
-0.0381478	3.67572	12.2845	0.0020315	0.0991428	rDPI_14974	chr14	23400943	23400951	chr14:23400943..23400951,chr14:23400707..23401003,-;peak:chr14:23400948..23400949,-;peakCounts:741.6	2556	-	23400948	ENST00000557461.2	ENSG00000197616.13	alternative	ENSG00000197616	MYH6
-0.0418293	8.10667	12.2761	0.00203732	0.0993525	rDPI_1743	chr1	52772674	52772675	chr1:52772674..52772675,-	409535	-	52772674	ENST00000437890.1	ENSG00000228929.1	promoter	ENSG00000228929	RPS13P2
-0.0196529	2.92986	12.2728	0.00203964	0.0993914	rDPI_9667	chr11	68213282	68213302	chr11:68213282..68213302,chr11:68213240..68213337,-;peak:chr11:68213284..68213285,-;peakCounts:516.1	2451	-	68213284	ENST00000304363.9	ENSG00000110066.15	alternative	ENSG00000110066	KMT5B
-0.0360483	2.43545	12.2691	0.00204218	0.0994092	rDPI_14855	chr14	23388178	23388183	chr14:23388178..23388183,chr14:23388159..23388344,-;peak:chr14:23388180..23388181,-;peakCounts:411	1252	-	23388180	ENST00000362287.2	ENSG00000199157.2	alternative	ENSG00000199157	MIR208A
0.0362212	3.74244	12.2679	0.00204305	0.0994092	rDPI_46752	chr7	4682291	4682306	chr7:4682291..4682306,chr7:4682217..4682495,+;peak:chr7:4682295..4682296,+;peakCounts:5085	12084	+	4682295	ENST00000328914.5	ENSG00000164916.11	promoter	ENSG00000164916	FOXK1
-0.03242	4.43765	12.2655	0.00204468	0.0994144	rDPI_32954	chr20	16730007	16730018	chr20:16730007..16730018,chr20:16729958..16730080,+;peak:chr20:16730009..16730010,+;peakCounts:2206.5	10866	+	16730009	ENST00000246071.8	ENSG00000125870.11	alternative	ENSG00000125870	SNRPB2
-0.0266482	2.82652	12.2556	0.00205159	0.0996761	rDPI_49673	chr8	26578013	26578019	chr8:26578013..26578019,chr8:26577843..26578150,+;peak:chr8:26578015..26578016,+;peakCounts:644.3	2404	+	26578015	ENST00000311151.9	ENSG00000092964.18	alternative	ENSG00000092964	DPYSL2
0.0311656	2.57099	12.2484	0.00205662	0.0998239	rDPI_10789	chr12	1594832	1594876	chr12:1594832..1594876,chr12:1594741..1594941,-;peak:chr12:1594845..1594846,-;peakCounts:341.1	2607	-	1594845	ENST00000339235.4	ENSG00000171823.7	enhancer	ENSG00000171823	FBXL14
0.0206506	6.81653	12.2456	0.0020586	0.0998239	rDPI_44118	chr6	13615332	13615345	chr6:13615332..13615345,chr6:13615270..13615625,+;peak:chr6:13615339..13615340,+;peakCounts:40357.8	91354	+	13615339	ENST00000451315.7	ENSG00000225921.7	promoter	ENSG00000225921	NOL7
-0.0466627	3.80859	12.2447	0.00205922	0.0998239	rDPI_51763	chr9	70043848	70043854	chr9:70043848..70043854,chr9:70043643..70044017,+;peak:chr9:70043848..70043849,+;peakCounts:3101.4	3548	+	70043848	ENST00000377182.5	ENSG00000165072.10	promoter	ENSG00000165072	MAMDC2
-0.0283892	4.3404	12.2396	0.00206284	0.0999253	rDPI_48207	chr7	100867383	100867398	chr7:100867383..100867398,chr7:100867315..100867450,+;peak:chr7:100867387..100867388,+;peakCounts:2599.2	7438	+	100867387	ENST00000496260.1	ENSG00000087077.14	promoter	ENSG00000087077	TRIP6
0.0361581	2.90941	12.2289	0.0020704	0.100217	rDPI_45029	chr6	41546590	41546611	chr6:41546590..41546611,chr6:41546541..41546666,+;peak:chr6:41546595..41546596,+;peakCounts:2067.3	5190	+	41546595	ENST00000409208.5	ENSG00000137166.17	promoter	ENSG00000137166	FOXP4
-0.0257323	1.07638	16.0111	0.00208174	0.100686	rDPI_20681	chr17	2593989	2593991	chr17:2593989..2593991,chr17:2593859..2594001,+;peak:chr17:2593989..2593990,+;peakCounts:195.6	313	+	2593989	ENST00000675430.1	ENSG00000007168.14	alternative	ENSG00000007168	PAFAH1B1
0.0303973	3.34959	12.2109	0.00208316	0.100686	rDPI_14399	chr13	97434192	97434231	chr13:97434192..97434231,chr13:97434021..97434248,+;peak:chr13:97434230..97434231,+;peakCounts:1019.7	6831	+	97434230	ENST00000245304.5	ENSG00000125249.7	promoter	ENSG00000125249	RAP2A
0.0304247	2.17097	12.2036	0.00208833	0.100814	rDPI_35747	chr22	50261678	50261689	chr22:50261678..50261689,chr22:50261653..50261814,-;peak:chr22:50261683..50261684,-;peakCounts:1155.6	2991	-	50261683	ENST00000215659.13	ENSG00000188130.14	promoter	ENSG00000188130	MAPK12
0.0531788	4.23391	12.2005	0.00209057	0.100814	rDPI_25470	chr19	15332534	15332546	chr19:15332534..15332546,chr19:15332448..15332566,-;peak:chr19:15332539..15332540,-;peakCounts:8963.1	14114	-	15332539	ENST00000679869.1	ENSG00000141867.19	promoter	ENSG00000141867	BRD4
0.0245434	1.48731	12.1989	0.00209169	0.100814	rDPI_4476	chr1	204494754	204494766	chr1:204494754..204494766,chr1:204494524..204494914,-;peak:chr1:204494758..204494759,-;peakCounts:320.3	1035	-	204494758	ENST00000415899.1	ENSG00000133056.13	alternative	ENSG00000133056	PIK3C2B
0.0426483	6.56989	12.1985	0.002092	0.100814	rDPI_28309	chr2	46542729	46542743	chr2:46542729..46542743,chr2:46542476..46542856,+;peak:chr2:46542736..46542737,+;peakCounts:62559	154819	+	46542736	ENST00000432183.5	ENSG00000119729.12	promoter	ENSG00000119729	RHOQ
-0.0353203	2.66915	12.1836	0.00210265	0.101179	rDPI_14226	chr13	51222393	51222399	chr13:51222393..51222399,chr13:51222300..51222462,+;peak:chr13:51222398..51222399,+;peakCounts:2004.3	2358	+	51222398	ENST00000322475.13	ENSG00000150510.17	alternative	ENSG00000150510	FAM124A
0.044444	3.44024	12.1836	0.00210267	0.101179	rDPI_25315	chr19	12995557	12995563	chr19:12995557..12995563,chr19:12995297..12995749,+;peak:chr19:12995562..12995563,+;peakCounts:6637.9	9403	+	12995562	ENST00000397661.6	ENSG00000008441.18	alternative	ENSG00000008441	NFIX
-0.0244065	3.20732	12.1795	0.00210561	0.101246	rDPI_37134	chr3	57556282	57556293	chr3:57556282..57556293,chr3:57556242..57556347,+;peak:chr3:57556287..57556288,+;peakCounts:3783.6	5762	+	57556287	ENST00000487257.1	ENSG00000174840.9	alternative	ENSG00000174840	PDE12
0.0213328	4.20492	12.172	0.00211102	0.101331	rDPI_38034	chr3	133573705	133573729	chr3:133573705..133573729,chr3:133573548..133574281,+;peak:chr3:133573710..133573711,+;peakCounts:7335	15120	+	133573710	ENST00000264993.8	ENSG00000091527.16	alternative	ENSG00000091527	CDV3
-0.0251019	3.14692	12.1716	0.00211127	0.101331	rDPI_27445	chr19	57389852	57389861	chr19:57389852..57389861,chr19:57389822..57389927,+;peak:chr19:57389854..57389855,+;peakCounts:2540.7	4827	+	57389854	ENST00000336128.12	ENSG00000188785.12	promoter	ENSG00000188785	ZNF548
-0.0254195	2.15993	12.1693	0.00211296	0.101331	rDPI_37166	chr3	58332923	58332930	chr3:58332923..58332930,chr3:58332864..58332982,+;peak:chr3:58332924..58332925,+;peakCounts:369.5	989	+	58332924	ENST00000484288.5	ENSG00000168297.16	alternative	ENSG00000168297	PXK
0.0454353	1.90691	12.1676	0.00211418	0.101331	rDPI_34830	chr22	22720623	22720628	chr22:22720623..22720628,+	1383	+	22720623	ENST00000390309.2	ENSG00000211663.2	promoter	ENSG00000211663	IGLV3-19
0.0271139	1.82531	12.1663	0.00211514	0.101331	rDPI_49204	chr7	153389589	153389604	chr7:153389589..153389604,chr7:153389574..153389654,+;peak:chr7:153389594..153389595,+;peakCounts:358.2	758	+	153389594	ENST00000649319.1	ENSG00000285524.1	enhancer	ENSG00000285524	NA
-0.0363978	2.7844	12.1639	0.0021169	0.101337	rDPI_53204	chr9	136996561	136996569	chr9:136996561..136996569,-	2700	-	136996565	ENST00000494426.2	ENSG00000169583.13	promoter	ENSG00000169583	CLIC3
0.0397862	1.34647	12.1618	0.00211842	0.101337	rDPI_15978	chr14	68937999	68938012	chr14:68937999..68938012,chr14:68937902..68938015,-;peak:chr14:68938011..68938012,-;peakCounts:202.5	289	-	68938011	ENST00000553779.5	ENSG00000072110.15	enhancer	ENSG00000072110	ACTN1
0.033575	3.74942	12.1597	0.00211992	0.101337	rDPI_17490	chr15	52679361	52679374	chr15:52679361..52679374,chr15:52679145..52679417,-;peak:chr15:52679365..52679366,-;peakCounts:3920.4	8119	-	52679365	ENST00000566768.5	ENSG00000047346.12	promoter	ENSG00000047346	FAM214A
0.0291448	1.58391	12.146	0.00212989	0.101674	rDPI_3122	chr1	151459476	151459495	chr1:151459476..151459495,chr1:151459425..151459509,-;peak:chr1:151459494..151459495,-;peakCounts:528.3	1425	-	151459494	ENST00000271715.7	ENSG00000143442.22	alternative	ENSG00000143442	POGZ
-0.0391195	2.54829	12.1457	0.00213008	0.101674	rDPI_13079	chr12	110350682	110350699	chr12:110350682..110350699,chr12:110350288..110350881,+;peak:chr12:110350693..110350694,+;peakCounts:717.5	1580	+	110350693	ENST00000553144.1	ENSG00000174437.17	alternative	ENSG00000174437	ATP2A2
0.0208913	1.77806	12.143	0.0021321	0.101684	rDPI_42506	chr5	111757737	111757745	chr5:111757737..111757745,chr5:111757609..111757797,-;peak:chr5:111757740..111757741,-;peakCounts:508.1	1159	-	111757740	ENST00000379671.7	ENSG00000134986.14	alternative	ENSG00000134986	NREP
0.030616	5.45497	12.1404	0.00213395	0.101684	rDPI_35292	chr22	37746258	37746277	chr22:37746258..37746277,chr22:37746181..37746437,+;peak:chr22:37746263..37746264,+;peakCounts:7830.3	27449	+	37746263	ENST00000428075.5	ENSG00000100106.22	promoter	ENSG00000100106	TRIOBP
-0.033702	1.30754	12.139	0.00213496	0.101684	rDPI_39481	chr4	41216452	41216454	chr4:41216452..41216454,-	923	-	41216452	ENST00000502682.1	ENSG00000163697.17	enhancer	ENSG00000163697	APBB2
0.0318854	1.42961	12.1322	0.00213995	0.101847	rDPI_27846	chr2	24920168	24920175	chr2:24920168..24920175,chr2:24920016..24920267,-;peak:chr2:24920171..24920172,-;peakCounts:376.8	790	-	24920171	ENST00000679454.1	ENSG00000138031.15	alternative	ENSG00000138031	ADCY3
-0.0337235	1.91515	12.1271	0.00214371	0.101952	rDPI_30172	chr2	177618711	177618718	chr2:177618711..177618718,chr2:177618690..177618758,-;peak:chr2:177618714..177618715,-;peakCounts:870.3	1201	-	177618714	ENST00000355689.6	ENSG00000197557.7	alternative	ENSG00000197557	TTC30A
-0.0346748	2.76859	12.1181	0.00215035	0.102145	rDPI_18197	chr15	78897220	78897226	chr15:78897220..78897226,chr15:78897142..78897240,+;peak:chr15:78897222..78897223,+;peakCounts:576.9	1748	+	78897222	ENST00000560710.1	ENSG00000185787.15	enhancer	ENSG00000185787	MORF4L1
0.044344	2.73411	12.1173	0.00215089	0.102145	rDPI_54738	chrX	129654955	129654957	chrX:129654955..129654957,chrX:129654952..129655019,-;peak:chrX:129654955..129654956,-;peakCounts:2673	5856	-	129654955	ENST00000429967.3	ENSG00000171388.12	promoter	ENSG00000171388	APLN
0.0308569	5.07526	12.1149	0.00215269	0.102156	rDPI_35291	chr22	37746238	37746254	chr22:37746238..37746254,chr22:37746181..37746437,+;peak:chr22:37746238..37746239,+;peakCounts:9240.3	21807	+	37746238	ENST00000407319.7	ENSG00000100106.22	alternative	ENSG00000100106	TRIOBP
0.0391395	2.54884	12.1109	0.00215565	0.102222	rDPI_53080	chr9	135087663	135087675	chr9:135087663..135087675,chr9:135087626..135087699,+;peak:chr9:135087668..135087669,+;peakCounts:935.1	2131	+	135087668	ENST00000371793.8	ENSG00000130558.20	promoter	ENSG00000130558	OLFM1
-0.025019	6.54492	12.1069	0.0021586	0.102288	rDPI_46491	chr6	159693301	159693308	chr6:159693301..159693308,chr6:159693142..159693361,-;peak:chr6:159693305..159693306,-;peakCounts:19154.5	52115	-	159693305	ENST00000337404.8	ENSG00000112096.19	alternative	ENSG00000112096	SOD2
-0.0406176	3.61435	12.0996	0.00216396	0.102467	rDPI_14896	chr14	23393347	23393356	chr14:23393347..23393356,chr14:23393340..23393523,-;peak:chr14:23393347..23393348,-;peakCounts:905.3	3469	-	23393347	ENST00000362287.2	ENSG00000199157.2	alternative	ENSG00000199157	MIR208A
-0.0293583	1.64843	12.0932	0.00216873	0.102619	rDPI_36300	chr3	36976257	36976266	chr3:36976257..36976266,+	1015	+	36976265	ENST00000412317.1	ENSG00000236165.1	promoter	ENSG00000236165	NA
-0.0545701	4.41064	12.0858	0.00217426	0.102769	rDPI_53478	chrM	9608	9619	chrM:9608..9619,chrM:9359..9631,+;peak:chrM:9613..9614,+;peakCounts:97	12302	+	9613	ENST00000387429.1	ENSG00000210164.1	alternative	ENSG00000210164	NA
0.0271767	2.15018	12.0809	0.00217791	0.102769	rDPI_46518	chr6	159969054	159969057	chr6:159969054..159969057,chr6:159968996..159969231,+;peak:chr6:159969055..159969056,+;peakCounts:1663.7	2632	+	159969055	ENST00000356956.6	ENSG00000197081.16	alternative	ENSG00000197081	IGF2R
-0.0254171	2.6436	12.0809	0.00217794	0.102769	rDPI_22702	chr17	63827716	63827726	chr17:63827716..63827726,chr17:63827669..63827802,+;peak:chr17:63827721..63827722,+;peakCounts:1338.1	2162	+	63827721	ENST00000580265.1	ENSG00000087191.13	alternative	ENSG00000087191	PSMC5
-0.0250162	3.53724	12.0757	0.00218179	0.102769	rDPI_13448	chr12	121888818	121888830	chr12:121888818..121888830,chr12:121888712..121888973,+;peak:chr12:121888822..121888823,+;peakCounts:2901.4	6077	+	121888822	ENST00000546333.1	ENSG00000256950.2	alternative	ENSG00000256950	NA
-0.030748	2.24231	12.0745	0.0021827	0.102769	rDPI_11929	chr12	54584308	54584312	chr12:54584308..54584312,chr12:54584274..54584326,-;peak:chr12:54584309..54584310,-;peakCounts:420.3	838	-	54584309	ENST00000553113.5	ENSG00000135447.17	promoter	ENSG00000135447	PPP1R1A
-0.0264687	2.2619	12.0743	0.00218287	0.102769	rDPI_2228	chr1	87328893	87328897	chr1:87328893..87328897,chr1:87328771..87329002,+;peak:chr1:87328894..87328895,+;peakCounts:617.9	1011	+	87328894	ENST00000370544.10	ENSG00000143013.13	alternative	ENSG00000143013	LMO4
0.0377907	1.71777	12.0742	0.00218293	0.102769	rDPI_10337	chr11	114296433	114296437	chr11:114296433..114296437,chr11:114296290..114296628,+;peak:chr11:114296435..114296436,+;peakCounts:160.9	661	+	114296435	ENST00000546313.1	ENSG00000166741.8	alternative	ENSG00000166741	NNMT
-0.0225849	4.55579	12.0656	0.00218934	0.102997	rDPI_33175	chr20	32819964	32819968	chr20:32819964..32819968,chr20:32819889..32820012,+;peak:chr20:32819967..32819968,+;peakCounts:4659.3	11410	+	32819967	ENST00000375571.6	ENSG00000101367.9	alternative	ENSG00000101367	MAPRE1
-0.055827	4.64451	12.0632	0.00219118	0.103009	rDPI_53780	chrX	24662749	24662756	chrX:24662749..24662756,chrX:24662642..24662849,+;peak:chrX:24662753..24662754,+;peakCounts:2214	4884	+	24662753	ENST00000432626.1	ENSG00000236836.1	enhancer	ENSG00000236836	PCYT1B-AS1
0.0259703	2.58779	12.0548	0.00219749	0.103112	rDPI_35102	chr22	31944501	31944507	chr22:31944501..31944507,chr22:31944383..31944816,+;peak:chr22:31944501..31944502,+;peakCounts:981.5	3473	+	31944501	ENST00000443669.5	ENSG00000128245.15	alternative	ENSG00000128245	YWHAH
-0.0224218	2.19971	12.0542	0.00219797	0.103112	rDPI_37474	chr3	100709361	100709367	chr3:100709361..100709367,chr3:100709281..100709744,+;peak:chr3:100709361..100709362,+;peakCounts:678.7	2095	+	100709361	ENST00000675553.1	ENSG00000114354.15	alternative	ENSG00000114354	TFG
-0.0375613	1.57277	12.0521	0.00219956	0.103112	rDPI_7568	chr10	119207709	119207718	chr10:119207709..119207718,chr10:119207651..119207819,+;peak:chr10:119207713..119207714,+;peakCounts:666	945	+	119207713	ENST00000392870.3	ENSG00000198873.12	alternative	ENSG00000198873	GRK5
0.0388912	1.91666	12.0473	0.00220313	0.103112	rDPI_15653	chr14	52695529	52695538	chr14:52695529..52695538,chr14:52695497..52695779,-;peak:chr14:52695529..52695530,-;peakCounts:1120.5	1610	-	52695529	ENST00000554251.5	ENSG00000197930.13	alternative	ENSG00000197930	ERO1A
-0.0214631	2.82896	12.0473	0.00220316	0.103112	rDPI_3104	chr1	151198585	151198591	chr1:151198585..151198591,chr1:151198490..151198710,+;peak:chr1:151198586..151198587,+;peakCounts:1224.6	4189	+	151198586	ENST00000424999.1	ENSG00000143398.20	alternative	ENSG00000143398	PIP5K1A
0.0329454	1.50502	12.0462	0.00220396	0.103112	rDPI_24318	chr19	461020	461025	chr19:461020..461025,chr19:461001..461095,-;peak:chr19:461020..461021,-;peakCounts:347	731	-	461020	ENST00000264554.10	ENSG00000129946.10	alternative	ENSG00000129946	SHC2
-0.0292317	2.92768	12.0456	0.00220443	0.103112	rDPI_32816	chr20	3767772	3767784	chr20:3767772..3767784,chr20:3767720..3767815,-;peak:chr20:3767775..3767776,-;peakCounts:552.4	2386	-	3767775	ENST00000399672.5	ENSG00000101220.18	alternative	ENSG00000101220	C20orf27
-0.0275509	2.97472	12.0402	0.00220852	0.103229	rDPI_1465	chr1	40709352	40709370	chr1:40709352..40709370,chr1:40709318..40709454,+;peak:chr1:40709366..40709367,+;peakCounts:1886.4	4113	+	40709366	ENST00000372652.5	ENSG00000066136.20	promoter	ENSG00000066136	NFYC
-0.0288538	1.14671	12.0382	0.0022101	0.103229	rDPI_45351	chr6	56816454	56816465	chr6:56816454..56816465,chr6:56816366..56816543,-;peak:chr6:56816459..56816460,-;peakCounts:165.6	247	-	56816459	ENST00000521821.1	ENSG00000151914.21	enhancer	ENSG00000151914	DST
-0.026044	4.29879	12.0334	0.0022137	0.103324	rDPI_36195	chr3	25783409	25783420	chr3:25783409..25783420,chr3:25783390..25783505,-;peak:chr3:25783414..25783415,-;peakCounts:5592.4	8141	-	25783414	ENST00000493324.5	ENSG00000151092.18	alternative	ENSG00000151092	NGLY1
-0.0237	6.02811	12.0282	0.0022177	0.103437	rDPI_29358	chr2	108719510	108719535	chr2:108719510..108719535,chr2:108719415..108719747,+;peak:chr2:108719518..108719519,+;peakCounts:9025.9	33070	+	108719518	ENST00000425282.4	ENSG00000153201.16	promoter	ENSG00000153201	RANBP2
-0.0321714	1.24696	12.0218	0.00222258	0.10359	rDPI_53442	chrM	8595	8611	chrM:8595..8611,chrM:8406..8620,-;peak:chrM:8610..8611,-;peakCounts:33.1	559	-	8610	ENST00000387416.2	ENSG00000210151.2	alternative	ENSG00000210151	MIR12136
0.0473526	3.09233	12.0086	0.00223267	0.103986	rDPI_18448	chr15	90902657	90902678	chr15:90902657..90902678,chr15:90902521..90902885,+;peak:chr15:90902665..90902666,+;peakCounts:2292.3	5607	+	90902665	ENST00000560451.5	ENSG00000196547.15	alternative	ENSG00000196547	MAN2A2
-0.0291965	4.04346	11.9992	0.00223991	0.103993	rDPI_1692	chr1	51236315	51236324	chr1:51236315..51236324,chr1:51236229..51236456,+;peak:chr1:51236319..51236320,+;peakCounts:9417.1	13942	+	51236319	ENST00000494873.1	ENSG00000123091.5	alternative	ENSG00000123091	RNF11
0.0320237	4.71591	11.9954	0.00224285	0.103993	rDPI_8304	chr11	14359170	14359184	chr11:14359170..14359184,chr11:14359028..14359222,-;peak:chr11:14359183..14359184,-;peakCounts:10440	22015	-	14359183	ENST00000256196.9	ENSG00000133818.14	promoter	ENSG00000133818	RRAS2
0.0236232	2.06337	11.9952	0.00224295	0.103993	rDPI_53557	chrX	2929290	2929317	chrX:2929290..2929317,chrX:2929274..2929386,-;peak:chrX:2929311..2929312,-;peakCounts:368.7	1693	-	2929311	ENST00000494870.5	ENSG00000006756.16	promoter	ENSG00000006756	ARSD
0.0334607	3.21171	11.9939	0.00224399	0.103993	rDPI_456	chr1	11926419	11926428	chr1:11926419..11926428,chr1:11926373..11926473,-;peak:chr1:11926424..11926425,-;peakCounts:1701.1	6075	-	11926424	ENST00000376572.8	ENSG00000116685.16	promoter	ENSG00000116685	KIAA2013
0.0254599	3.41033	11.9938	0.00224407	0.103993	rDPI_47357	chr7	44325626	44325634	chr7:44325626..44325634,chr7:44325364..44325776,-;peak:chr7:44325631..44325632,-;peakCounts:2151.9	6208	-	44325631	ENST00000457475.5	ENSG00000058404.20	alternative	ENSG00000058404	CAMK2B
0.0289491	2.6884	11.9937	0.00224415	0.103993	rDPI_29361	chr2	109128254	109128265	chr2:109128254..109128265,chr2:109128203..109128345,+;peak:chr2:109128262..109128263,+;peakCounts:2192.4	4366	+	109128262	ENST00000309415.8	ENSG00000172985.11	enhancer	ENSG00000172985	SH3RF3
0.0335514	3.30655	11.9901	0.00224687	0.103993	rDPI_26311	chr19	40191422	40191435	chr19:40191422..40191435,chr19:40191397..40191516,+;peak:chr19:40191429..40191430,+;peakCounts:2318.4	5092	+	40191429	ENST00000253055.8	ENSG00000130758.8	promoter	ENSG00000130758	MAP3K10
0.0275408	2.13472	11.987	0.00224927	0.103993	rDPI_1320	chr1	36323608	36323619	chr1:36323608..36323619,chr1:36323512..36323663,-;peak:chr1:36323614..36323615,-;peakCounts:345.4	1865	-	36323614	ENST00000490466.1	ENSG00000142694.6	alternative	ENSG00000142694	EVA1B
-0.0264811	3.81148	11.9865	0.0022497	0.103993	rDPI_48218	chr7	101085475	101085485	chr7:101085475..101085485,chr7:101085385..101085531,+;peak:chr7:101085481..101085482,+;peakCounts:2625.3	5492	+	101085481	ENST00000306085.11	ENSG00000169871.13	promoter	ENSG00000169871	TRIM56
0.0199331	3.68033	11.9861	0.00224998	0.103993	rDPI_28050	chr2	28894665	28894670	chr2:28894665..28894670,chr2:28894615..28894719,+;peak:chr2:28894667..28894668,+;peakCounts:6210.8	7398	+	28894667	ENST00000407426.8	ENSG00000163811.12	alternative	ENSG00000163811	WDR43
0.0494866	5.48926	11.9831	0.0022523	0.103993	rDPI_21133	chr17	9021582	9021599	chr17:9021582..9021599,chr17:9021478..9021868,+;peak:chr17:9021588..9021589,+;peakCounts:2958.1	12433	+	9021588	ENST00000173229.7	ENSG00000065320.9	promoter	ENSG00000065320	NTN1
0.0308273	3.24491	11.9823	0.00225296	0.103993	rDPI_32820	chr20	3786771	3786786	chr20:3786771..3786786,chr20:3786631..3786862,-;peak:chr20:3786774..3786775,-;peakCounts:1410.8	5826	-	3786774	ENST00000379751.5	ENSG00000125817.8	alternative	ENSG00000125817	CENPB
0.0615794	2.40538	11.9816	0.00225351	0.103993	rDPI_4420	chr1	203186701	203186706	chr1:203186701..203186706,-	1141	-	203186704	ENST00000255409.8	ENSG00000133048.13	promoter	ENSG00000133048	CHI3L1
-0.0247913	1.14616	12.3246	0.00226506	0.104452	rDPI_50421	chr8	96233165	96233174	chr8:96233165..96233174,chr8:96233160..96233231,-;peak:chr8:96233169..96233170,-;peakCounts:303.3	492	-	96233169	ENST00000517523.1	ENSG00000156467.10	alternative	ENSG00000156467	UQCRB
0.0374683	0.989105	11.9627	0.00226819	0.104522	rDPI_15085	chr14	23416312	23416318	chr14:23416312..23416318,chr14:23416006..23416319,-;peak:chr14:23416317..23416318,-;peakCounts:1025.8	3647	-	23416317	ENST00000401172.1	ENSG00000215991.1	alternative	ENSG00000215991	MIR208B
-0.0251648	4.01862	11.9592	0.00227095	0.104576	rDPI_21663	chr17	36948951	36948960	chr17:36948951..36948960,chr17:36948853..36949212,+;peak:chr17:36948956..36948957,+;peakCounts:3363.3	8557	+	36948956	ENST00000619387.5	ENSG00000275700.6	promoter	ENSG00000275700	AATF
0.0349671	3.86745	11.9556	0.00227376	0.104631	rDPI_30067	chr2	173090686	173090702	chr2:173090686..173090702,chr2:173090549..173090824,+;peak:chr2:173090701..173090702,+;peakCounts:16474.5	37987	+	173090701	ENST00000422149.1	ENSG00000091436.17	promoter	ENSG00000091436	MAP3K20
-0.0268343	4.46978	11.9515	0.00227695	0.104635	rDPI_11280	chr12	19129762	19129774	chr12:19129762..19129774,chr12:19129508..19129827,+;peak:chr12:19129769..19129770,+;peakCounts:2434.2	14077	+	19129769	ENST00000540972.5	ENSG00000052126.15	alternative	ENSG00000052126	PLEKHA5
-0.0279834	3.55778	11.9486	0.00227924	0.104635	rDPI_38148	chr3	139539624	139539642	chr3:139539624..139539642,chr3:139539505..139539758,-;peak:chr3:139539636..139539637,-;peakCounts:896.7	2645	-	139539636	ENST00000619087.4	ENSG00000114115.10	alternative	ENSG00000114115	RBP1
0.0404183	6.79064	11.9481	0.00227961	0.104635	rDPI_46541	chr6	163414759	163414779	chr6:163414759..163414779,chr6:163414592..163415335,+;peak:chr6:163414769..163414770,+;peakCounts:31801.4	107828	+	163414769	ENST00000361752.8	ENSG00000112531.17	promoter	ENSG00000112531	QKI
0.0524677	4.77689	11.9473	0.00228025	0.104635	rDPI_28192	chr2	38076060	38076195	chr2:38076060..38076195,chr2:38076060..38076195,-	16305	-	38076151	ENST00000610745.5	ENSG00000138061.12	promoter	ENSG00000138061	CYP1B1
0.0475955	2.87325	11.9376	0.00228789	0.104724	rDPI_39971	chr4	83536237	83536248	chr4:83536237..83536248,chr4:83535974..83536607,+;peak:chr4:83536242..83536243,+;peakCounts:5493.6	6885	+	83536242	ENST00000509412.1	ENSG00000138678.11	promoter	ENSG00000138678	GPAT3
-0.0344776	3.77319	11.9364	0.00228884	0.104724	rDPI_6138	chr10	51074482	51074505	chr10:51074482..51074505,chr10:51074315..51074656,+;peak:chr10:51074487..51074488,+;peakCounts:3037.5	7919	+	51074487	ENST00000373980.11	ENSG00000185532.20	promoter	ENSG00000185532	PRKG1
-0.0293359	6.64652	11.9364	0.00228886	0.104724	rDPI_32360	chr2	227325263	227325280	chr2:227325263..227325280,chr2:227325214..227325407,+;peak:chr2:227325275..227325276,+;peakCounts:14634	47328	+	227325275	ENST00000460756.5	ENSG00000168958.20	promoter	ENSG00000168958	MFF
-0.025489	1.07553	20.753	0.00228938	0.104724	chr7:135774318-135774794	chr7	135774318	135774794	chr7:135774318-135774794	46	.	135774449	ENST00000419211.2	ENSG00000224746.2	promoter	ENSG00000224746	NA
0.0390972	2.23416	11.9347	0.00229021	0.104724	rDPI_21243	chr17	17042511	17042512	chr17:17042511..17042512,chr17:17042352..17042722,+;peak:chr17:17042511..17042512,+;peakCounts:859.9	3868	+	17042511	ENST00000577514.5	ENSG00000133030.22	alternative	ENSG00000133030	MPRIP
0.0393609	1.99214	11.9228	0.00229958	0.105079	rDPI_20516	chr16	89923342	89923346	chr16:89923342..89923346,+	1148	+	89923345	ENST00000556536.5	ENSG00000258947.8	promoter	ENSG00000258947	TUBB3
-0.0699746	3.67342	11.9186	0.00230292	0.105106	rDPI_21335	chr17	19004167	19004176	chr17:19004167..19004176,chr17:19004148..19004218,-;peak:chr17:19004171..19004172,-;peakCounts:1484.1	1978	-	19004171	ENST00000345041.4	ENSG00000188522.15	promoter	ENSG00000188522	FAM83G
0.0403946	4.22785	11.918	0.0023034	0.105106	rDPI_38971	chr3	197298105	197298156	chr3:197298105..197298156,chr3:197297821..197298177,-;peak:chr3:197298115..197298116,-;peakCounts:2234.7	12845	-	197298115	ENST00000392382.6	ENSG00000075711.21	promoter	ENSG00000075711	DLG1
-0.0280813	1.85325	11.9157	0.00230528	0.105119	rDPI_309	chr1	8703259	8703271	chr1:8703259..8703271,chr1:8703193..8703436,-;peak:chr1:8703265..8703266,-;peakCounts:102.7	798	-	8703265	ENST00000468247.1	ENSG00000142599.19	promoter	ENSG00000142599	RERE
-0.0256953	1.16782	11.9122	0.002308	0.10517	rDPI_30149	chr2	176201172	176201182	chr2:176201172..176201182,chr2:176201110..176201250,-;peak:chr2:176201176..176201177,-;peakCounts:254.4	518	-	176201176	ENST00000405359.2	ENSG00000218175.2	alternative	ENSG00000218175	NA
0.0249402	1.61885	11.9047	0.00231401	0.105358	rDPI_9010	chr11	61581044	61581048	chr11:61581044..61581048,chr11:61580987..61581232,-;peak:chr11:61581045..61581046,-;peakCounts:179.8	650	-	61581045	ENST00000539008.6	ENSG00000011347.10	alternative	ENSG00000011347	SYT7
0.0561683	3.62625	11.903	0.00231537	0.105358	rDPI_29535	chr2	127675465	127675482	chr2:127675465..127675482,chr2:127675459..127675554,-;peak:chr2:127675466..127675467,-;peakCounts:2529	7337	-	127675466	ENST00000355119.9	ENSG00000072163.20	alternative	ENSG00000072163	LIMS2
-0.0390771	1.83521	11.8959	0.00232108	0.105545	rDPI_48816	chr7	134933339	134933362	chr7:134933339..134933362,chr7:134932983..134934062,+;peak:chr7:134933344..134933345,+;peakCounts:104.7	1085	+	134933344	ENST00000478075.1	ENSG00000122786.20	promoter	ENSG00000122786	CALD1
0.0402597	3.51123	11.8938	0.00232276	0.105547	rDPI_51460	chr9	33817155	33817165	chr9:33817155..33817165,chr9:33817072..33817204,+;peak:chr9:33817160..33817161,+;peakCounts:7642.8	14889	+	33817160	ENST00000263228.4	ENSG00000107341.5	promoter	ENSG00000107341	UBE2R2
0.0384398	4.16556	11.8846	0.00233009	0.105793	rDPI_24415	chr19	1205774	1205783	chr19:1205774..1205783,chr19:1205717..1205882,+;peak:chr19:1205778..1205779,+;peakCounts:4977	14195	+	1205778	ENST00000326873.12	ENSG00000118046.16	promoter	ENSG00000118046	STK11
0.0271374	1.76353	11.883	0.0023314	0.105793	rDPI_45110	chr6	43171364	43171371	chr6:43171364..43171371,chr6:43171238..43171601,+;peak:chr6:43171367..43171368,+;peakCounts:171.1	1013	+	43171367	ENST00000265354.6	ENSG00000112658.8	alternative	ENSG00000112658	SRF
-0.0399216	3.02082	11.8754	0.00233753	0.105943	rDPI_11978	chr12	55726237	55726247	chr12:55726237..55726247,chr12:55726132..55726264,-;peak:chr12:55726245..55726246,-;peakCounts:988.2	1962	-	55726245	ENST00000548117.5	ENSG00000135404.12	enhancer	ENSG00000135404	CD63
0.0223453	1.50256	11.8749	0.00233795	0.105943	rDPI_38499	chr3	170037995	170038003	chr3:170037995..170038003,+	952	+	170037995	ENST00000355897.10	ENSG00000173890.17	promoter	ENSG00000173890	GPR160
0.0330251	1.94082	11.8491	0.00235884	0.106815	rDPI_33101	chr20	25390801	25390804	chr20:25390801..25390804,chr20:25390705..25390912,-;peak:chr20:25390802..25390803,-;peakCounts:978.1	2018	-	25390802	ENST00000339157.10	ENSG00000100997.20	alternative	ENSG00000100997	ABHD12
-0.0526537	2.59393	11.8468	0.00236078	0.106829	rDPI_10158	chr11	107707799	107707839	chr11:107707799..107707839,chr11:107707599..107708008,-;peak:chr11:107707812..107707813,-;peakCounts:131	725	-	107707812	ENST00000305991.3	ENSG00000170290.4	enhancer	ENSG00000170290	SLN
-0.0220391	1.37399	15.4775	0.00236386	0.10683	rDPI_50870	chr8	141391995	141391997	chr8:141391995..141391997,chr8:141391957..141392089,+;peak:chr8:141391995..141391996,+;peakCounts:71.4	595	+	141391995	ENST00000520105.5	ENSG00000184489.13	alternative	ENSG00000184489	PTP4A3
0.0283371	1.50192	11.8427	0.00236408	0.10683	rDPI_25849	chr19	33194289	33194302	chr19:33194289..33194302,chr19:33194217..33194377,+;peak:chr19:33194292..33194293,+;peakCounts:322.2	981	+	33194292	ENST00000253193.9	ENSG00000130881.14	alternative	ENSG00000130881	LRP3
-0.0310571	3.05372	11.8391	0.00236705	0.10689	rDPI_52383	chr9	113275448	113275459	chr9:113275448..113275459,chr9:113275360..113275615,-;peak:chr9:113275453..113275454,-;peakCounts:331.5	3445	-	113275453	ENST00000490408.5	ENSG00000176386.9	alternative	ENSG00000176386	CDC26
-0.0267186	1.49734	11.8349	0.0023705	0.106972	rDPI_3375	chr1	155208827	155208835	chr1:155208827..155208835,chr1:155208733..155208949,+;peak:chr1:155208827..155208828,+;peakCounts:405	751	+	155208827	ENST00000316721.8	ENSG00000173171.15	promoter	ENSG00000173171	MTX1
0.0359163	1.8952	11.8238	0.00237961	0.107278	rDPI_29334	chr2	105744788	105744819	chr2:105744788..105744819,+	1731	+	105744805	ENST00000233154.9	ENSG00000071051.14	alternative	ENSG00000071051	NCK2
0.0455604	3.86645	11.8217	0.00238137	0.107278	rDPI_23802	chr18	28177990	28177995	chr18:28177990..28177995,chr18:28177613..28178046,-;peak:chr18:28177994..28177995,-;peakCounts:4346.6	8571	-	28177994	ENST00000676445.1	ENSG00000170558.10	alternative	ENSG00000170558	CDH2
0.0384801	4.76845	11.8206	0.00238221	0.107278	rDPI_18481	chr15	92882829	92882831	chr15:92882829..92882831,chr15:92882632..92882881,+;peak:chr15:92882829..92882830,+;peakCounts:17469.9	19719	+	92882829	ENST00000556895.5	ENSG00000272888.7	promoter	ENSG00000272888	NA
-0.0276185	1.56808	11.8171	0.0023851	0.107334	rDPI_26738	chr19	46636168	46636203	chr19:46636168..46636203,-	239	-	46636180	ENST00000300873.4	ENSG00000167414.4	enhancer	ENSG00000167414	GNG8
-0.0299983	1.31695	11.8104	0.00239067	0.107511	rDPI_30006	chr2	169810860	169810861	chr2:169810860..169810861,chr2:169810856..169810917,+;peak:chr2:169810860..169810861,+;peakCounts:417.6	464	+	169810860	ENST00000494051.1	ENSG00000138385.16	enhancer	ENSG00000138385	SSB
-0.0236353	2.25846	11.802	0.00239767	0.107752	rDPI_13701	chr13	20525816	20525820	chr13:20525816..20525820,chr13:20525766..20525912,-;peak:chr13:20525818..20525819,-;peakCounts:229.5	1436	-	20525818	ENST00000643035.1	ENSG00000165475.15	alternative	ENSG00000165475	CRYL1
-0.0347473	4.31694	11.7989	0.00240018	0.107771	rDPI_48890	chr7	139341331	139341339	chr7:139341331..139341339,chr7:139341265..139341397,+;peak:chr7:139341331..139341332,+;peakCounts:4349	13115	+	139341331	ENST00000297534.7	ENSG00000164898.13	alternative	ENSG00000164898	FMC1
-0.0203132	6.16808	11.7975	0.00240141	0.107771	rDPI_26391	chr19	41264414	41264439	chr19:41264414..41264439,chr19:41264311..41264840,+;peak:chr19:41264422..41264423,+;peakCounts:14851.8	41115	+	41264422	ENST00000617774.1	ENSG00000105323.17	promoter	ENSG00000105323	HNRNPUL1
0.0741371	3.64483	11.7947	0.00240367	0.107799	rDPI_10338	chr11	114296445	114296458	chr11:114296445..114296458,chr11:114296290..114296628,+;peak:chr11:114296450..114296451,+;peakCounts:1266.9	4456	+	114296450	ENST00000546313.1	ENSG00000166741.8	alternative	ENSG00000166741	NNMT
0.022779	1.45088	11.7906	0.00240713	0.107869	rDPI_5203	chr1	236686316	236686324	chr1:236686316..236686324,chr1:236686268..236686368,+;peak:chr1:236686319..236686320,+;peakCounts:521.1	763	+	236686319	ENST00000542672.6	ENSG00000077522.14	alternative	ENSG00000077522	ACTN2
0.0212201	4.23782	11.7889	0.00240855	0.107869	rDPI_25573	chr19	17511646	17511653	chr19:17511646..17511653,chr19:17511602..17511725,+;peak:chr19:17511652..17511653,+;peakCounts:5074.2	11478	+	17511652	ENST00000252603.7	ENSG00000130313.7	promoter	ENSG00000130313	PGLS
0.0403898	5.87001	11.7794	0.0024165	0.108151	rDPI_5858	chr10	28533115	28533144	chr10:28533115..28533144,chr10:28533061..28533445,+;peak:chr10:28533131..28533132,+;peakCounts:6566.4	41578	+	28533131	ENST00000354911.9	ENSG00000095787.24	promoter	ENSG00000095787	WAC
-0.0325869	1.94685	11.7721	0.00242264	0.108258	rDPI_53429	chrM	8124	8151	chrM:8124..8151,chrM:8026..8279,-;peak:chrM:8130..8131,-;peakCounts:554.4	1437	-	8130	ENST00000387416.2	ENSG00000210151.2	alternative	ENSG00000210151	MIR12136
-0.0256505	1.61639	11.7702	0.00242417	0.108258	rDPI_37334	chr3	73623615	73623628	chr3:73623615..73623628,chr3:73623504..73623726,+;peak:chr3:73623621..73623622,+;peakCounts:287.1	844	+	73623621	ENST00000619517.4	ENSG00000239677.6	promoter	ENSG00000239677	NA
-0.0306977	1.87234	11.769	0.0024252	0.108258	rDPI_34957	chr22	28679810	28679828	chr22:28679810..28679828,chr22:28679799..28679914,-;peak:chr22:28679812..28679813,-;peakCounts:927	1751	-	28679812	ENST00000468807.1	ENSG00000100154.14	promoter	ENSG00000100154	TTC28
-0.0342745	2.94534	11.7686	0.00242551	0.108258	rDPI_22402	chr17	50426217	50426223	chr17:50426217..50426223,chr17:50426213..50426273,+;peak:chr17:50426218..50426219,+;peakCounts:1464.5	2126	+	50426218	ENST00000504945.1	ENSG00000167107.13	alternative	ENSG00000167107	ACSF2
-0.0568208	2.53177	11.7614	0.00243162	0.108401	rDPI_27800	chr2	20637408	20637427	chr2:20637408..20637427,chr2:20637325..20637547,+;peak:chr2:20637417..20637418,+;peakCounts:476.5	1573	+	20637417	ENST00000272224.5	ENSG00000143869.7	alternative	ENSG00000143869	GDF7
-0.0296198	1.11843	11.7606	0.00243225	0.108401	rDPI_49494	chr8	19678577	19678592	chr8:19678577..19678592,chr8:19678541..19678639,+;peak:chr8:19678582..19678583,+;peakCounts:288	792	+	19678582	ENST00000519803.1	ENSG00000253270.1	promoter	ENSG00000253270	NA
0.0358206	2.59053	11.7582	0.00243427	0.108401	rDPI_13534	chr12	123533685	123533691	chr12:123533685..123533691,chr12:123533188..123533793,-;peak:chr12:123533685..123533686,-;peakCounts:621.2	2436	-	123533685	ENST00000636882.1	ENSG00000188026.13	alternative	ENSG00000188026	RILPL1
0.0312791	4.68928	11.757	0.00243537	0.108401	rDPI_27000	chr19	49640128	49640136	chr19:49640128..49640136,chr19:49639968..49640249,-;peak:chr19:49640132..49640133,-;peakCounts:8521.2	15340	-	49640132	ENST00000601532.1	ENSG00000126458.4	alternative	ENSG00000126458	RRAS
0.0290978	5.02571	11.753	0.00243868	0.108475	rDPI_40138	chr4	94451969	94451973	chr4:94451969..94451973,chr4:94451820..94452050,+;peak:chr4:94451972..94451973,+;peakCounts:18142.9	35389	+	94451972	ENST00000542407.5	ENSG00000163110.15	alternative	ENSG00000163110	PDLIM5
-0.0176971	3.38832	11.74	0.00244974	0.108704	rDPI_9713	chr11	69675341	69675358	chr11:69675341..69675358,chr11:69675310..69675385,-;peak:chr11:69675353..69675354,-;peakCounts:1200.6	4515	-	69675353	ENST00000538554.6	ENSG00000149716.13	promoter	ENSG00000149716	LTO1
0.0252576	2.54414	11.7397	0.00245001	0.108704	rDPI_40625	chr4	139665869	139665880	chr4:139665869..139665880,chr4:139665683..139666067,+;peak:chr4:139665874..139665875,+;peakCounts:2657.5	4709	+	139665874	ENST00000506797.5	ENSG00000085871.9	alternative	ENSG00000085871	MGST2
0.0282753	1.52647	11.7385	0.00245105	0.108704	rDPI_46534	chr6	163414173	163414189	chr6:163414173..163414189,chr6:163414135..163414190,+;peak:chr6:163414186..163414187,+;peakCounts:662.4	1562	+	163414186	ENST00000361758.8	ENSG00000112531.17	alternative	ENSG00000112531	QKI
-0.0238175	2.57201	11.7371	0.00245218	0.108704	rDPI_52382	chr9	113275431	113275437	chr9:113275431..113275437,chr9:113275360..113275615,-;peak:chr9:113275431..113275432,-;peakCounts:333.5	2240	-	113275431	ENST00000490408.5	ENSG00000176386.9	alternative	ENSG00000176386	CDC26
-0.0233163	3.27376	11.7349	0.00245404	0.108704	rDPI_15695	chr14	54489008	54489018	chr14:54489008..54489018,chr14:54488909..54489098,-;peak:chr14:54489012..54489013,-;peakCounts:1577.7	3219	-	54489012	ENST00000554908.5	ENSG00000197045.13	alternative	ENSG00000197045	GMFB
-0.0235982	1.90106	11.7337	0.00245507	0.108704	rDPI_2917	chr1	147600220	147600243	chr1:147600220..147600243,chr1:147600104..147600271,+;peak:chr1:147600228..147600229,+;peakCounts:231	824	+	147600228	ENST00000497938.1	ENSG00000116128.11	promoter	ENSG00000116128	BCL9
-0.0246725	4.74282	11.7332	0.00245549	0.108704	rDPI_44578	chr6	31666102	31666107	chr6:31666102..31666107,chr6:31666040..31666189,+;peak:chr6:31666106..31666107,+;peakCounts:15706.8	18024	+	31666106	ENST00000375880.6	ENSG00000263020.6	promoter	ENSG00000263020	NA
0.0383293	2.71455	11.7292	0.00245894	0.108783	rDPI_927	chr1	26159074	26159081	chr1:26159074..26159081,chr1:26159006..26159082,+;peak:chr1:26159080..26159081,+;peakCounts:1283.4	2477	+	26159080	ENST00000374268.5	ENSG00000197245.6	promoter	ENSG00000197245	FAM110D
0.0330279	3.48448	11.7242	0.00246321	0.108898	rDPI_41643	chr5	42423728	42423753	chr5:42423728..42423753,chr5:42423676..42423825,+;peak:chr5:42423738..42423739,+;peakCounts:1427.4	6277	+	42423738	ENST00000230882.9	ENSG00000112964.14	promoter	ENSG00000112964	GHR
0.0403676	3.79844	11.7199	0.00246692	0.108988	rDPI_24883	chr19	7516117	7516124	chr19:7516117..7516124,chr19:7516065..7516250,+;peak:chr19:7516120..7516121,+;peakCounts:2622.4	6599	+	7516120	ENST00000597229.2	ENSG00000198816.7	alternative	ENSG00000198816	ZNF358
0.0354153	1.80609	11.7081	0.00247704	0.109361	rDPI_52022	chr9	93451728	93451736	chr9:93451728..93451736,chr9:93451658..93451772,+;peak:chr9:93451732..93451733,+;peakCounts:2815.2	3368	+	93451732	ENST00000277165.11	ENSG00000048828.17	alternative	ENSG00000048828	FAM120A
-0.0254339	7.75514	11.7046	0.00247999	0.109418	rDPI_53495	chrM	11885	11891	chrM:11885..11891,chrM:9681..12236,+;peak:chrM:11890..11891,+;peakCounts:42138.9	101470	+	11890	ENST00000387441.1	ENSG00000210176.1	alternative	ENSG00000210176	NA
0.0337895	1.99869	11.6985	0.00248527	0.109576	rDPI_11028	chr12	6927825	6927845	chr12:6927825..6927845,chr12:6927638..6928374,+;peak:chr12:6927834..6927835,+;peakCounts:686.5	3009	+	6927834	ENST00000396684.3	ENSG00000111676.15	alternative	ENSG00000111676	ATN1
0.0260797	1.84212	11.6966	0.00248693	0.109576	rDPI_16903	chr15	31327339	31327364	chr15:31327339..31327364,chr15:31327308..31327431,+;peak:chr15:31327350..31327351,+;peakCounts:259.5	1427	+	31327350	ENST00000558921.1	ENSG00000169926.11	alternative	ENSG00000169926	KLF13
0.0204379	3.28258	11.6943	0.00248896	0.109591	rDPI_37313	chr3	71725381	71725385	chr3:71725381..71725385,chr3:71725283..71725462,-;peak:chr3:71725383..71725384,-;peakCounts:2985.4	4476	-	71725383	ENST00000425534.8	ENSG00000163412.13	alternative	ENSG00000163412	EIF4E3
0.0209306	1.68681	11.685	0.00249696	0.109821	rDPI_51378	chr9	26947262	26947269	chr9:26947262..26947269,chr9:26947049..26947308,-;peak:chr9:26947264..26947265,-;peakCounts:385.3	1250	-	26947264	ENST00000397292.8	ENSG00000137055.15	alternative	ENSG00000137055	PLAA
-0.0312691	1.86141	11.6844	0.00249754	0.109821	rDPI_2824	chr1	143904650	143904654	chr1:143904650..143904654,-	592	-	143904653	ENST00000609585.1	ENSG00000234571.2	promoter	ENSG00000234571	NA
-0.0518379	4.16137	11.6819	0.00249968	0.109841	rDPI_14826	chr14	23384681	23384706	chr14:23384681..23384706,chr14:23384216..23384714,-;peak:chr14:23384686..23384687,-;peakCounts:1640.4	8704	-	23384686	ENST00000651452.1	ENSG00000197616.13	alternative	ENSG00000197616	MYH6
0.0226678	1.7682	11.6758	0.00250502	0.110002	rDPI_36124	chr3	16884950	16884956	chr3:16884950..16884956,chr3:16884916..16885048,+;peak:chr3:16884953..16884954,+;peakCounts:306	995	+	16884953	ENST00000615277.5	ENSG00000154822.18	alternative	ENSG00000154822	PLCL2
-0.0385916	2.95744	11.6541	0.00252399	0.110718	rDPI_1741	chr1	52772517	52772523	chr1:52772517..52772523,chr1:52772501..52772635,-;peak:chr1:52772517..52772518,-;peakCounts:2106.9	2845	-	52772517	ENST00000437890.1	ENSG00000228929.1	alternative	ENSG00000228929	RPS13P2
0.0212247	1.55816	13.8689	0.00252472	0.110718	rDPI_43880	chr6	2245667	2245676	chr6:2245667..2245676,chr6:2245514..2245708,-;peak:chr6:2245672..2245673,-;peakCounts:323.3	812	-	2245672	ENST00000380815.5	ENSG00000112699.11	alternative	ENSG00000112699	GMDS
-0.0257072	4.38648	11.6497	0.00252783	0.110747	rDPI_32924	chr20	10434171	10434175	chr20:10434171..10434175,chr20:10434112..10434275,-;peak:chr20:10434172..10434173,-;peakCounts:2891.6	7541	-	10434172	ENST00000652676.1	ENSG00000125863.20	alternative	ENSG00000125863	MKKS
-0.0286253	1.46869	11.6486	0.00252878	0.110747	rDPI_29260	chr2	100820350	100820359	chr2:100820350..100820359,chr2:100820295..100820373,+;peak:chr2:100820358..100820359,+;peakCounts:776.7	1096	+	100820358	ENST00000335681.10	ENSG00000170485.17	alternative	ENSG00000170485	NPAS2
0.0296609	2.55795	11.6453	0.00253175	0.110803	rDPI_33314	chr20	36154603	36154632	chr20:36154603..36154632,chr20:36154532..36154883,+;peak:chr20:36154626..36154627,+;peakCounts:804.1	3643	+	36154626	ENST00000338074.7	ENSG00000088367.23	promoter	ENSG00000088367	EPB41L1
0.0311201	3.87217	11.6415	0.00253504	0.110873	rDPI_24323	chr19	531716	531727	chr19:531716..531727,chr19:531667..531874,+;peak:chr19:531721..531722,+;peakCounts:12596.6	18835	+	531721	ENST00000215574.9	ENSG00000099804.9	alternative	ENSG00000099804	CDC34
-0.0361134	1.69743	11.6372	0.00253884	0.110965	rDPI_40330	chr4	109560227	109560228	chr4:109560227..109560228,chr4:109560147..109560358,+;peak:chr4:109560227..109560228,+;peakCounts:213.5	397	+	109560227	ENST00000515114.3	ENSG00000005059.16	alternative	ENSG00000005059	MCUB
-0.0259004	1.01102	17.0539	0.00255047	0.111399	rDPI_12829	chr12	104288982	104288988	chr12:104288982..104288988,chr12:104288865..104289025,+;peak:chr12:104288987..104288988,+;peakCounts:110.6	230	+	104288987	ENST00000527335.5	ENSG00000198431.16	alternative	ENSG00000198431	TXNRD1
0.0248396	1.49472	11.6191	0.00255492	0.111472	rDPI_33657	chr20	47785465	47785468	chr20:47785465..47785468,chr20:47785354..47785527,-;peak:chr20:47785466..47785467,-;peakCounts:343	595	-	47785466	ENST00000437955.1	ENSG00000196562.14	alternative	ENSG00000196562	SULF2
-0.0261724	1.57595	11.6184	0.00255557	0.111472	rDPI_31614	chr2	190181037	190181046	chr2:190181037..190181046,chr2:190180614..190181095,+;peak:chr2:190181041..190181042,+;peakCounts:39.3	625	+	190181041	ENST00000443551.2	ENSG00000187699.10	alternative	ENSG00000187699	C2orf88
-0.0259701	4.24445	11.613	0.00256038	0.111533	rDPI_46314	chr6	149746517	149746535	chr6:149746517..149746535,chr6:149746489..149746574,-;peak:chr6:149746522..149746523,-;peakCounts:4137.6	8667	-	149746522	ENST00000340413.7	ENSG00000120253.14	promoter	ENSG00000120253	NUP43
0.0360315	3.22264	11.613	0.00256039	0.111533	rDPI_24482	chr19	1592856	1592871	chr19:1592856..1592871,chr19:1592623..1592934,-;peak:chr19:1592864..1592865,-;peakCounts:2067.3	4851	-	1592864	ENST00000434436.8	ENSG00000071655.18	promoter	ENSG00000071655	MBD3
0.0313837	2.42111	11.6074	0.00256538	0.111676	rDPI_9584	chr11	67289298	67289337	chr11:67289298..67289337,chr11:67289271..67289452,+;peak:chr11:67289303..67289304,+;peakCounts:360.9	2153	+	67289303	ENST00000512101.5	ENSG00000172932.16	promoter	ENSG00000172932	ANKRD13D
-0.0261282	1.58511	11.5952	0.00257631	0.112077	rDPI_45734	chr6	109440731	109440745	chr6:109440731..109440745,chr6:109440665..109440792,+;peak:chr6:109440740..109440741,+;peakCounts:263.7	772	+	109440740	ENST00000258052.8	ENSG00000135587.9	promoter	ENSG00000135587	SMPD2
0.0307153	8.02091	11.5848	0.00258571	0.112411	rDPI_24591	chr19	3062470	3062552	chr19:3062470..3062552,chr19:3062179..3062667,-;peak:chr19:3062495..3062496,-;peakCounts:15989.4	118533	-	3062495	ENST00000327141.9	ENSG00000104964.15	promoter	ENSG00000104964	TLE5
0.0301861	5.8466	11.5797	0.0025903	0.112433	rDPI_6294	chr10	69088102	69088118	chr10:69088102..69088118,chr10:69088035..69088232,+;peak:chr10:69088105..69088106,+;peakCounts:8074.8	27186	+	69088105	ENST00000242465.4	ENSG00000122862.5	promoter	ENSG00000122862	SRGN
-0.027608	3.49111	11.5785	0.0025914	0.112433	rDPI_51911	chr9	86947651	86947663	chr9:86947651..86947663,chr9:86947575..86947756,-;peak:chr9:86947658..86947659,-;peakCounts:1882.6	3837	-	86947658	ENST00000298743.9	ENSG00000180447.7	alternative	ENSG00000180447	GAS1
-0.0271901	3.61744	11.5776	0.00259217	0.112433	rDPI_5984	chr10	38010688	38010700	chr10:38010688..38010700,chr10:38010597..38010779,+;peak:chr10:38010693..38010694,+;peakCounts:2339.1	5339	+	38010693	ENST00000476504.5	ENSG00000189180.16	alternative	ENSG00000189180	ZNF33A
-0.0521197	1.61878	11.5766	0.00259309	0.112433	rDPI_15041	chr14	23410327	23410365	chr14:23410327..23410365,chr14:23410325..23410455,+;peak:chr14:23410354..23410355,+;peakCounts:66.6	438	+	23410354	ENST00000557368.1	ENSG00000258444.1	enhancer	ENSG00000258444	NA
-0.024859	1.1073	14.3415	0.00259664	0.112498	rDPI_38042	chr3	133588793	133588800	chr3:133588793..133588800,chr3:133588743..133588800,+;peak:chr3:133588798..133588799,+;peakCounts:121.5	368	+	133588798	ENST00000515421.1	ENSG00000091527.16	enhancer	ENSG00000091527	CDV3
[truncated: 63,791 more rows]

## Sheet: male ventricles
logFC	logCPM	F	PValue	FDR	cluster_id2	cluster_chr	cluster_start	cluster_end	cluster_id1	cluster_tagcount	cluster_strand	TSS_or_center	transcriptId	geneId	cons_clust_class	geneId2	geneName2
[truncated: 65,298 more rows]

[truncated: 2 more sheets: female atria, female ventricles]
