# Supplementary material for: Sex modulates the human genome regulatory network during heart failure and aging.
Source: Research Square preprint supplement (doi:10.21203/rs.3.rs-2202852/v1), 2022-11-11
Supplement: Supplementary file 4 [file d37b944d301519745a5d04f1.xlsx]

## Sheet: CAGE.DPU.M.Healthy.Atrium
geneId	cluster_chr	cluster_strand	NExons	gene.F	P.Value	FDR
ENSG00000078114.19	chr10	-	7	17.3029	4.4618e-14	8.55773e-11
ENSG00000099204.20	chr10	-	5	17.0536	3.28539e-10	3.15069e-07
ENSG00000167658.16	chr19	-	3	32.2947	7.72474e-10	4.93868e-07
ENSG00000166710.21	chr15	+	2	57.2625	5.12113e-09	2.45558e-06
ENSG00000112096.19	chr6	-	3	25.9331	1.55417e-08	5.54348e-06
ENSG00000156508.19	chr6	-	3	25.7145	1.73414e-08	5.54348e-06
ENSG00000110651.12	chr11	+	3	24.2982	3.56765e-08	9.77536e-06
ENSG00000155657.28	chr2	-	6	10.1411	7.83338e-08	1.86968e-05
ENSG00000104964.15	chr19	-	2	44.05	8.77328e-08	1.86968e-05
ENSG00000115414.21	chr2	-	5	11.9534	1.06837e-07	2.04914e-05
ENSG00000196562.14	chr20	-	2	42.5247	1.25553e-07	2.18918e-05
ENSG00000119729.12	chr2	+	3	20.7774	2.35054e-07	3.75695e-05
ENSG00000162614.19	chr1	+	3	20.2969	3.07373e-07	4.53494e-05
ENSG00000130522.6	chr19	-	2	38.0391	3.76051e-07	5.1519e-05
ENSG00000211445.12	chr5	+	3	19.544	4.70614e-07	5.66451e-05
ENSG00000095787.24	chr10	+	2	37.139	4.72534e-07	5.66451e-05
ENSG00000106263.18	chr7	+	2	36.2327	5.96453e-07	6.7294e-05
ENSG00000197182.14	chr22	+	3	18.7147	7.58588e-07	8.08317e-05
ENSG00000070404.10	chr19	+	2	34.2376	1.00678e-06	0.000101432
ENSG00000124380.11	chr2	+	2	34.0444	1.06001e-06	0.000101432
ENSG00000089225.20	chr12	-	4	12.7395	1.11057e-06	0.000101432
ENSG00000198125.13	chr22	-	5	9.95313	1.29588e-06	0.000112977
ENSG00000091436.17	chr2	+	3	17.1982	1.85918e-06	0.00015273
ENSG00000197111.16	chr12	+	3	17.1525	1.91111e-06	0.00015273
ENSG00000182093.16	chr21	+	2	31.5206	2.10662e-06	0.00016162
ENSG00000157216.16	chr1	-	2	30.0168	3.21294e-06	0.000237016
ENSG00000168958.20	chr2	+	2	29.6199	3.59763e-06	0.000255565
ENSG00000178882.15	chr12	+	2	29.0003	4.29842e-06	0.000294442
ENSG00000130255.13	chr19	+	2	28.0841	5.61086e-06	0.000362237
ENSG00000140416.23	chr15	+	7	6.57671	5.66585e-06	0.000362237
ENSG00000204628.12	chr5	-	5	8.67399	6.89089e-06	0.000426346
ENSG00000162433.15	chr1	+	3	14.969	7.36538e-06	0.000441463
ENSG00000077044.11	chr2	+	2	26.2276	9.74892e-06	0.000545131
ENSG00000231500.7	chr6	+	2	26.1728	9.91188e-06	0.000545131
ENSG00000214530.10	chr11	-	2	26.1002	1.01322e-05	0.000545131
ENSG00000125818.18	chr20	+	2	26.0554	1.02708e-05	0.000545131
ENSG00000004776.13	chr19	-	2	25.9776	1.05161e-05	0.000545131
ENSG00000112531.17	chr6	+	2	25.5846	1.1853e-05	0.000598266
ENSG00000101160.15	chr20	-	3	13.7731	1.5904e-05	0.000764018
ENSG00000141867.19	chr19	-	2	24.6246	1.59336e-05	0.000764018
ENSG00000149925.22	chr16	+	4	9.91739	1.70697e-05	0.00078753
ENSG00000170525.21	chr10	+	3	13.6294	1.74723e-05	0.00078753
ENSG00000131711.15	chr5	+	2	24.2458	1.79314e-05	0.00078753
ENSG00000112419.14	chr6	+	2	24.2218	1.80664e-05	0.00078753
ENSG00000196712.18	chr17	+	2	23.8768	2.01327e-05	0.000858099
ENSG00000138162.19	chr10	+	4	9.60371	2.34388e-05	0.000963303
ENSG00000278189.1	chr21	+	2	23.3738	2.36054e-05	0.000963303
ENSG00000069122.19	chr6	-	2	23.1258	2.55453e-05	0.00102075
ENSG00000167978.17	chr16	+	4	9.4736	2.67554e-05	0.00104728
ENSG00000111961.18	chr6	+	3	12.7773	3.07373e-05	0.00117908
ENSG00000105373.19	chr19	+	3	12.7091	3.2176e-05	0.00121007
ENSG00000065989.16	chr19	+	2	22.2118	3.42824e-05	0.00126449
ENSG00000156414.19	chr14	+	2	22.1107	3.54276e-05	0.00128208
ENSG00000182473.22	chr17	-	2	22.0167	3.65281e-05	0.00129742
ENSG00000160271.16	chr9	-	3	12.4836	3.74504e-05	0.001306
ENSG00000157540.22	chr21	+	2	21.6718	4.08863e-05	0.00140035
ENSG00000078304.19	chr14	+	3	12.0922	4.88462e-05	0.00164363
ENSG00000164692.18	chr7	+	5	7.17246	5.29779e-05	0.00171441
ENSG00000118046.16	chr19	+	2	20.88	5.31105e-05	0.00171441
ENSG00000118785.14	chr4	+	2	20.8507	5.36311e-05	0.00171441
ENSG00000095637.22	chr10	-	2	20.7963	5.46109e-05	0.00171711
ENSG00000110955.9	chr12	-	3	11.7092	6.35146e-05	0.00196485
ENSG00000159251.8	chr15	-	4	8.59166	6.64714e-05	0.00202369
ENSG00000160216.21	chr21	+	3	11.4117	7.80295e-05	0.00233845
ENSG00000196628.20	chr18	-	6	5.91227	8.20179e-05	0.00241433
ENSG00000100906.11	chr14	-	2	19.5528	8.30792e-05	0.00241433
ENSG00000143013.13	chr1	+	2	19.397	8.7627e-05	0.00250849
ENSG00000145592.14	chr5	-	2	19.2491	9.21892e-05	0.00259459
ENSG00000134775.15	chr18	+	2	19.213	9.33402e-05	0.00259459
ENSG00000132510.11	chr17	+	3	11.0485	0.000100547	0.00275498
ENSG00000178104.19	chr1	+	3	10.883	0.000112949	0.00305122
ENSG00000129422.14	chr8	-	3	10.7634	0.000122897	0.00327384
ENSG00000169926.11	chr15	+	2	18.0014	0.000142303	0.00373888
ENSG00000186439.14	chr6	-	2	17.8296	0.0001512	0.00391895
ENSG00000086015.22	chr1	+	2	17.2811	0.000183767	0.00469953
ENSG00000171033.13	chr8	+	2	17.2058	0.000188789	0.00476443
ENSG00000008324.12	chr3	+	2	17.1321	0.000193844	0.00478903
ENSG00000133818.14	chr11	-	2	17.119	0.000194757	0.00478903
ENSG00000075413.19	chr14	+	2	16.6746	0.000228612	0.00555034
ENSG00000065320.9	chr17	+	2	16.6149	0.000233613	0.00560088
ENSG00000079215.15	chr5	+	3	9.83065	0.000239656	0.00564305
ENSG00000104951.16	chr19	-	2	16.5022	0.000243376	0.00564305
ENSG00000135387.21	chr11	+	2	16.4702	0.000246224	0.00564305
ENSG00000141562.18	chr17	+	2	16.46	0.000247141	0.00564305
ENSG00000148180.21	chr9	+	6	5.2412	0.000265522	0.00599143
ENSG00000141905.19	chr19	+	7	4.67543	0.000279555	0.00623474
ENSG00000104763.20	chr8	-	7	4.65893	0.000289352	0.00637904
ENSG00000164107.9	chr4	-	3	9.55012	0.000293968	0.00640716
ENSG00000132819.17	chr20	+	2	15.8004	0.000314749	0.00678301
ENSG00000179604.10	chr17	-	2	15.5849	0.000340883	0.00712744
ENSG00000065054.14	chr16	+	3	9.33245	0.00034484	0.00712744
ENSG00000188643.11	chr1	-	2	15.5528	0.000344964	0.00712744
ENSG00000128272.16	chr22	+	2	15.5479	0.000345595	0.00712744
ENSG00000100412.17	chr22	+	2	15.5101	0.000350482	0.00715132
ENSG00000143322.21	chr1	-	2	15.3152	0.00037687	0.0076088
ENSG00000022267.19	chrX	+	5	5.76953	0.00038462	0.00767258
ENSG00000153250.20	chr2	-	3	9.17239	0.000388029	0.00767258
ENSG00000184007.22	chr1	-	3	9.10757	0.000407083	0.0079672
ENSG00000174282.12	chr17	-	2	15.0563	0.00041522	0.00804436
ENSG00000129824.16	chrY	+	2	14.9677	0.000429283	0.00813628
ENSG00000135821.19	chr1	-	2	14.9543	0.000431462	0.00813628
ENSG00000020577.14	chr14	+	5	5.67565	0.000440301	0.00813628
ENSG00000103495.14	chr16	+	2	14.8594	0.00044716	0.00813628
ENSG00000118194.20	chr1	-	7	4.43955	0.00045762	0.00813628
ENSG00000138606.19	chr15	-	2	14.7936	0.000458403	0.00813628
ENSG00000140743.8	chr16	-	2	14.7898	0.000459066	0.00813628
ENSG00000205542.11	chrX	+	2	14.771	0.00046234	0.00813628
ENSG00000105323.17	chr19	+	2	14.752	0.00046567	0.00813628
ENSG00000123562.18	chrX	-	2	14.7319	0.000469211	0.00813628
ENSG00000129991.13	chr19	-	2	14.7298	0.000469591	0.00813628
ENSG00000165995.22	chr10	+	3	8.91148	0.000470869	0.00813628
ENSG00000038382.20	chr5	+	3	8.87842	0.000482608	0.00822151
ENSG00000131873.7	chr15	-	2	14.6479	0.000484375	0.00822151
ENSG00000105568.18	chr19	+	2	14.371	0.000538145	0.00905405
ENSG00000105401.9	chr19	-	2	14.3168	0.000549378	0.00916268
ENSG00000022840.16	chr12	+	3	8.68842	0.000556222	0.00919684
ENSG00000189337.17	chr1	+	2	14.2241	0.00056921	0.00933114
ENSG00000144579.8	chr2	+	2	14.0246	0.000614464	0.00998765
ENSG00000070778.13	chr14	-	2	13.7947	0.0006714	0.0108214
ENSG00000166681.14	chrX	+	2	13.7195	0.000691219	0.011048
ENSG00000142599.19	chr1	-	6	4.69006	0.000705193	0.0111782
ENSG00000175084.12	chr2	+	4	6.35182	0.000744743	0.0117083
ENSG00000172572.7	chr12	+	2	13.3727	0.000791005	0.0123177
ENSG00000161011.20	chr5	+	3	8.19703	0.000805897	0.0123177
ENSG00000172765.17	chr3	-	2	13.3115	0.000810124	0.0123177
ENSG00000135900.4	chr2	+	2	13.2953	0.000815269	0.0123177
ENSG00000213853.10	chr16	-	2	13.2943	0.000815614	0.0123177
ENSG00000159840.16	chr7	+	3	8.14479	0.00083856	0.0125569
ENSG00000142192.21	chr21	-	2	13.1955	0.000847761	0.0125569
ENSG00000184939.16	chr16	+	2	13.1855	0.000851093	0.0125569
ENSG00000139112.11	chr12	+	3	8.0734	0.000885434	0.0129638
ENSG00000137573.14	chr8	+	2	12.9467	0.000934926	0.0135848
ENSG00000169946.14	chr8	+	2	12.8986	0.000952833	0.0136991
ENSG00000168264.11	chr1	-	2	12.8873	0.000957082	0.0136991
ENSG00000143179.16	chr1	+	2	12.8645	0.000965755	0.0137209
ENSG00000167815.12	chr19	-	2	12.514	0.00110991	0.0156529
ENSG00000173812.11	chr17	+	2	12.4276	0.00114884	0.0160074
ENSG00000073849.16	chr3	+	3	7.73041	0.00115173	0.0160074
ENSG00000155324.10	chr5	+	2	12.3227	0.0011981	0.016532
ENSG00000173221.14	chr5	-	2	12.2729	0.00122227	0.0167451
ENSG00000168309.18	chr3	-	3	7.61617	0.00125789	0.0171109
ENSG00000167244.21	chr11	-	4	5.85167	0.00130468	0.0176224
ENSG00000109016.17	chr17	+	2	12.0506	0.00133658	0.017927
ENSG00000170439.7	chr12	+	2	12.0167	0.00135498	0.0180476
ENSG00000267577.1	chr19	+	2	11.9505	0.00139166	0.018262
ENSG00000105379.10	chr19	-	2	11.9385	0.00139848	0.018262
ENSG00000075234.17	chr22	+	2	11.9286	0.00140407	0.018262
ENSG00000115306.16	chr2	+	3	7.46961	0.00140917	0.018262
ENSG00000154358.23	chr1	+	3	7.43733	0.00144495	0.0186001
ENSG00000101997.13	chrX	+	2	11.8221	0.001466	0.0187453
ENSG00000148450.13	chr10	+	2	11.7711	0.00149663	0.0190101
ENSG00000182957.16	chr13	+	2	11.7075	0.00153585	0.0193801
ENSG00000117595.12	chr1	-	2	11.6382	0.00157978	0.0197518
ENSG00000133835.17	chr5	+	2	11.6287	0.00158591	0.0197518
ENSG00000114738.11	chr3	+	2	11.6125	0.00159643	0.0197545
ENSG00000164587.13	chr5	-	3	7.24459	0.0016792	0.0204225
ENSG00000156467.10	chr8	-	3	7.24225	0.00168229	0.0204225
ENSG00000172638.13	chr11	-	3	7.2422	0.00168235	0.0204225
ENSG00000135679.25	chr12	+	2	11.4247	0.00172389	0.0207951
ENSG00000072062.15	chr19	-	2	11.3804	0.00175542	0.0210432
ENSG00000184840.12	chr5	+	2	11.3176	0.00180129	0.0213765
ENSG00000125520.14	chr20	+	3	7.1482	0.00181083	0.0213765
ENSG00000156381.9	chr14	-	2	11.2968	0.00181679	0.0213765
ENSG00000182149.21	chr16	+	2	11.2619	0.00184303	0.0213765
ENSG00000223865.11	chr6	+	2	11.256	0.00184756	0.0213765
ENSG00000149932.17	chr16	+	2	11.2526	0.00185011	0.0213765
ENSG00000198431.16	chr12	+	4	5.53263	0.00187318	0.0215135
ENSG00000152242.11	chr18	+	2	11.1626	0.00192003	0.0219204
ENSG00000134686.18	chr1	-	2	11.1433	0.00193545	0.0219657
ENSG00000107816.17	chr10	+	2	11.0818	0.00198523	0.0223981
ENSG00000142875.19	chr1	+	2	11.0226	0.00203446	0.0227824
ENSG00000119950.21	chr10	+	3	6.99467	0.00204305	0.0227824
ENSG00000144802.11	chr3	+	2	10.9804	0.0020704	0.0229539
ENSG00000100097.12	chr22	+	3	6.9471	0.00212112	0.0233811
ENSG00000127603.30	chr1	+	8	3.43001	0.0021543	0.0236112
ENSG00000072778.20	chr17	+	4	5.39734	0.00218574	0.0238025
ENSG00000173402.12	chr3	+	2	10.838	0.00219658	0.0238025
ENSG00000130600.19	chr11	-	3	6.83903	0.00231021	0.0248932
ENSG00000163171.8	chr2	-	2	10.6823	0.00234397	0.0251158
ENSG00000147140.17	chrX	+	2	10.6598	0.00236616	0.0252127
ENSG00000159069.14	chr9	-	2	10.5416	0.00248622	0.0262809
ENSG00000142541.18	chr19	+	2	10.5343	0.00249381	0.0262809
ENSG00000111912.20	chr6	+	4	5.2269	0.00265686	0.0277247
ENSG00000071575.11	chr2	+	2	10.3812	0.00265972	0.0277247
ENSG00000116857.17	chr1	-	2	10.3623	0.00268098	0.0277953
ENSG00000141447.18	chr18	-	2	10.3411	0.00270507	0.0278942
ENSG00000205133.12	chr8	-	2	10.2446	0.00281766	0.0288353
ENSG00000108823.16	chr17	+	2	10.2373	0.0028264	0.0288353
ENSG00000107372.13	chr9	-	2	10.2101	0.00285915	0.0290151
ENSG00000204843.13	chr2	-	3	6.5114	0.002998	0.030264
ENSG00000105204.14	chr19	-	2	10.0822	0.00301851	0.0303115
ENSG00000004799.8	chr7	-	3	6.47603	0.00308403	0.0308081
ENSG00000173171.15	chr1	+	2	9.94933	0.00319419	0.0317433
ENSG00000144824.21	chr3	+	4	5.05524	0.00323692	0.0320021
ENSG00000122786.20	chr7	+	4	5.02401	0.00335566	0.0330059
ENSG00000182196.13	chr12	+	2	9.76987	0.00344899	0.0337508
ENSG00000133083.15	chr13	-	3	6.28327	0.00360013	0.035051
ENSG00000071655.18	chr19	-	2	9.65284	0.00362676	0.035132
ENSG00000116132.12	chr1	+	3	6.23854	0.00373222	0.0359718
ENSG00000064932.16	chr19	-	3	6.22001	0.00378841	0.0363308
ENSG00000131016.17	chr6	+	3	6.15872	0.00398061	0.0379841
ENSG00000196704.14	chr17	+	2	9.41636	0.00401652	0.0380629
ENSG00000101019.22	chr20	-	2	9.40945	0.00402855	0.0380629
ENSG00000100138.15	chr22	-	3	6.13281	0.00406488	0.0382179
ENSG00000116685.16	chr1	-	2	9.50843	0.00410681	0.0384237
ENSG00000075240.17	chr22	+	2	9.33645	0.00415813	0.038715
ENSG00000128641.19	chr2	+	2	9.30916	0.00420772	0.0388875
ENSG00000186104.11	chr11	-	2	9.29676	0.00423045	0.0388875
ENSG00000169813.16	chr10	-	3	6.08144	0.00423748	0.0388875
ENSG00000141524.17	chr17	-	2	9.22106	0.00437212	0.039932
ENSG00000054654.19	chr14	+	4	4.76804	0.00451307	0.041024
ENSG00000197746.14	chr10	-	3	5.95601	0.0046917	0.0421206
ENSG00000168734.14	chr20	+	2	9.05859	0.00469356	0.0421206
ENSG00000184489.13	chr8	+	4	4.73318	0.00469958	0.0421206
ENSG00000114541.15	chr3	-	5	4.03881	0.00486793	0.0434264
ENSG00000008256.16	chr7	-	2	8.96175	0.00489709	0.0434844
ENSG00000162512.16	chr1	-	2	8.93935	0.00494552	0.043558
ENSG00000087460.28	chr20	+	5	4.02748	0.00495081	0.043558
ENSG00000131730.16	chr5	+	3	5.8556	0.00509158	0.044592
ENSG00000130175.10	chr19	+	2	8.8333	0.00518175	0.0451754
ENSG00000076864.19	chr1	-	2	8.81412	0.00522574	0.0452096
ENSG00000081870.12	chr1	-	2	8.81105	0.00523281	0.0452096
ENSG00000137106.18	chr9	+	2	8.74155	0.00539586	0.0464093
ENSG00000113916.18	chr3	-	2	8.71656	0.0054558	0.0465651
ENSG00000159348.13	chr1	-	2	8.71313	0.00546409	0.0465651
ENSG00000118971.9	chr12	+	2	8.70374	0.00548682	0.0465651
ENSG00000151414.15	chr1	+	2	8.68043	0.00554372	0.0468137
ENSG00000103710.11	chr15	-	2	8.67181	0.00556493	0.0468137
ENSG00000124225.16	chr20	-	2	8.65267	0.00561231	0.0470062
ENSG00000059691.12	chr4	-	3	5.73003	0.00564203	0.0470496
ENSG00000129116.19	chr4	+	3	5.68074	0.00587469	0.0487778
ENSG00000138061.12	chr2	-	2	8.49968	0.00600695	0.0496609
ENSG00000188343.13	chr8	+	2	8.46669	0.00609586	0.0501797
ENSG00000008853.17	chr8	+	3	5.61892	0.00618064	0.0506601
ENSG00000198842.10	chr1	+	3	5.58268	0.00636764	0.0519708
ENSG00000106772.18	chr9	-	2	8.35158	0.00641737	0.0521548
ENSG00000182606.17	chr3	+	2	8.31576	0.00652107	0.0525799
ENSG00000087266.17	chr4	+	2	8.31029	0.00653705	0.0525799
ENSG00000205268.11	chr8	-	2	8.29692	0.00657633	0.0525799
ENSG00000103316.12	chr16	-	2	8.2959	0.00657934	0.0525799
ENSG00000147526.20	chr8	+	3	5.52778	0.00666224	0.0529947
ENSG00000108821.14	chr17	-	7	3.15836	0.0067155	0.0529947
ENSG00000100201.23	chr22	-	2	8.24815	0.00672173	0.0529947
ENSG00000138835.22	chr9	+	6	3.4303	0.00675425	0.0529947
ENSG00000125618.18	chr2	-	2	8.23026	0.00677594	0.0529947
ENSG00000143401.15	chr1	-	2	8.22333	0.00679703	0.0529947
ENSG00000248923.1	chr5	-	2	8.20903	0.00684084	0.0531165
ENSG00000131408.15	chr19	+	2	8.2002	0.00686803	0.0531165
ENSG00000072518.22	chr11	+	2	8.16569	0.00697544	0.0537305
ENSG00000119335.17	chr9	+	2	8.1483	0.00703026	0.0539361
ENSG00000111245.17	chr12	-	3	5.43297	0.00720471	0.0550543
ENSG00000177565.18	chr3	-	2	8.07217	0.00727568	0.0552209
ENSG00000144560.15	chr3	-	4	4.35646	0.00729653	0.0552209
ENSG00000204257.15	chr6	-	2	8.06087	0.00731288	0.0552209
ENSG00000103496.15	chr16	+	2	8.03289	0.00740586	0.0557037
ENSG00000041982.16	chr9	-	2	7.99299	0.00754068	0.0564962
ENSG00000170558.10	chr18	-	2	7.97633	0.00759775	0.05651
ENSG00000135778.12	chr1	+	2	7.97526	0.00760145	0.05651
ENSG00000275832.5	chr17	+	3	5.3561	0.00767811	0.0568595
ENSG00000060237.19	chr12	+	2	7.9417	0.00771788	0.0569342
ENSG00000179820.16	chr19	+	2	7.9318	0.00775258	0.0569711
ENSG00000068383.19	chr10	+	2	7.89986	0.0078657	0.0573779
ENSG00000125107.19	chr16	-	2	7.89928	0.00786777	0.0573779
ENSG00000087095.13	chr17	+	2	7.83269	0.00810939	0.0589123
ENSG00000167701.14	chr8	+	2	7.81219	0.00818538	0.0589123
ENSG00000198270.13	chr12	-	2	7.80069	0.00822835	0.0589123
ENSG00000073536.18	chr17	-	2	7.80054	0.00822893	0.0589123
ENSG00000226306.6	chr5	+	2	7.79752	0.00824022	0.0589123
ENSG00000197050.11	chr19	+	2	7.78625	0.00828262	0.0589123
ENSG00000055118.16	chr7	-	2	7.78346	0.00829318	0.0589123
ENSG00000110031.13	chr11	-	2	7.73126	0.00849288	0.0601083
ENSG00000064205.11	chr20	+	2	7.70851	0.00858153	0.0603628
ENSG00000105974.13	chr7	+	2	7.7059	0.00859178	0.0603628
ENSG00000132478.10	chr17	+	2	7.66086	0.00877046	0.0612139
ENSG00000064225.12	chr3	+	2	7.64358	0.00884009	0.0612139
ENSG00000180035.13	chr16	+	2	7.64356	0.00884015	0.0612139
ENSG00000149187.18	chr11	-	2	7.64345	0.00884059	0.0612139
ENSG00000177685.17	chr11	+	2	7.63138	0.00888957	0.0613316
ENSG00000084674.15	chr2	-	2	7.61832	0.00894289	0.0614784
ENSG00000126226.22	chr13	-	2	7.59088	0.00905605	0.061857
ENSG00000179526.17	chr8	-	3	5.15504	0.00907548	0.061857
ENSG00000109686.19	chr4	-	3	5.15251	0.00909472	0.061857
ENSG00000160691.19	chr1	-	2	7.54611	0.00924398	0.06265
ENSG00000130299.17	chr19	+	2	7.53173	0.00930524	0.0628431
ENSG00000249464.6	chr4	+	2	7.49306	0.00947211	0.0637457
ENSG00000136950.13	chr9	+	2	7.45594	0.00963533	0.0644288
ENSG00000143226.15	chr1	+	2	7.4547	0.00964081	0.0644288
ENSG00000170485.17	chr2	+	2	7.43882	0.00971158	0.0646764
ENSG00000183072.10	chr5	-	2	7.43083	0.00974741	0.0646904
ENSG00000172493.22	chr4	+	3	5.05979	0.00982732	0.0649959
ENSG00000136715.19	chr2	-	2	7.35725	0.0100841	0.0660752
ENSG00000162241.12	chr11	-	2	7.35695	0.0100855	0.0660752
ENSG00000019144.19	chr11	+	4	4.08067	0.0100939	0.0660752
ENSG00000143344.16	chr1	+	2	7.3472	0.0101311	0.066093
ENSG00000107317.13	chr9	+	3	4.99737	0.0103549	0.0672937
ENSG00000126777.18	chr14	+	3	4.99388	0.0103853	0.0672937
ENSG00000075131.10	chr15	-	2	7.23519	0.0106704	0.0689084
ENSG00000113648.16	chr5	-	2	7.21125	0.0107897	0.0694449
ENSG00000088986.11	chr12	+	2	7.19943	0.010849	0.0695934
ENSG00000164708.6	chr7	-	2	7.18654	0.0109142	0.0697784
ENSG00000166483.12	chr11	+	2	7.14941	0.0111043	0.0707579
ENSG00000134287.10	chr12	-	2	7.1209	0.0112527	0.0714661
ENSG00000166348.19	chr10	-	2	7.08615	0.0114364	0.0723931
ENSG00000113578.18	chr5	-	2	7.07418	0.0115005	0.0724855
ENSG00000134419.15	chr16	-	2	7.06932	0.0115266	0.0724855
ENSG00000243678.12	chr17	+	2	7.05436	0.0116074	0.072755
ENSG00000065882.16	chr4	+	2	7.00212	0.0118943	0.0743102
ENSG00000063177.13	chr19	-	2	6.98799	0.0119732	0.0745602
ENSG00000178982.10	chr19	+	2	6.97845	0.0120268	0.0746516
ENSG00000136848.17	chr9	+	4	3.92636	0.0121141	0.0749514
ENSG00000187954.13	chr8	-	2	6.91376	0.012397	0.0764547
ENSG00000196465.10	chr12	+	2	6.87727	0.0126112	0.0775267
ENSG00000088808.18	chr14	-	2	6.85622	0.0127366	0.0780474
ENSG00000092931.11	chr17	+	2	6.82137	0.0129472	0.0790851
ENSG00000141971.13	chr19	+	2	6.79139	0.0131314	0.0795934
ENSG00000089693.11	chr12	-	4	3.85794	0.0131373	0.0795934
ENSG00000135404.12	chr12	-	4	3.85682	0.0131549	0.0795934
ENSG00000132463.14	chr4	-	2	6.77704	0.0132205	0.0797386
ENSG00000137074.20	chr9	-	2	6.76312	0.0133076	0.0800125
ENSG00000198218.11	chr3	-	2	6.7144	0.0136172	0.0816184
ENSG00000137764.20	chr15	+	2	6.656	0.0139988	0.083644
ENSG00000198467.16	chr9	-	4	3.80094	0.0140568	0.0836497
ENSG00000075711.21	chr3	-	2	6.64274	0.014087	0.0836497
ENSG00000081377.17	chr9	-	2	6.61023	0.0143058	0.0846868
ENSG00000213145.10	chr14	+	2	6.58602	0.0144711	0.0852596
ENSG00000187098.17	chr3	+	3	4.59608	0.0145292	0.0852596
ENSG00000169862.19	chr5	-	2	6.57662	0.0145359	0.0852596
ENSG00000011451.21	chr19	-	3	4.58297	0.014692	0.0859123
ENSG00000179915.24	chr2	-	3	4.56479	0.0149208	0.0866978
ENSG00000071242.12	chr6	-	2	6.51661	0.0149567	0.0866978
ENSG00000154678.18	chr7	-	2	6.51588	0.0149619	0.0866978
ENSG00000183955.13	chr12	+	2	6.46629	0.0153197	0.0885036
ENSG00000244687.12	chr20	-	2	6.44341	0.0154878	0.0889663
ENSG00000008513.16	chr8	-	2	6.43794	0.0155284	0.0889663
ENSG00000013563.14	chrX	-	2	6.43273	0.015567	0.0889663
ENSG00000145016.16	chr3	-	2	6.42521	0.015623	0.0889663
ENSG00000140105.18	chr14	-	2	6.42405	0.0156317	0.0889663
ENSG00000135390.21	chr12	-	3	4.49385	0.0158498	0.0899407
ENSG00000068305.17	chr15	+	2	6.37417	0.016009	0.0904106
ENSG00000128918.15	chr15	-	3	4.48082	0.0160269	0.0904106
ENSG00000173451.7	chr12	+	2	6.33725	0.0162946	0.0915115
ENSG00000094916.16	chr12	-	2	6.33432	0.0163175	0.0915115
ENSG00000077150.20	chr10	+	2	6.3233	0.0164039	0.0917281
ENSG00000175274.19	chr11	-	2	6.29165	0.016655	0.0928065
ENSG00000113742.14	chr5	+	4	3.65539	0.0167127	0.0928065
ENSG00000205678.8	chr4	-	2	6.27688	0.0167736	0.0928065
ENSG00000142871.18	chr1	+	2	6.2748	0.0167903	0.0928065
ENSG00000172992.12	chr17	-	2	6.26684	0.0168546	0.092887
ENSG00000205581.11	chr21	-	2	6.26103	0.0169017	0.092887
ENSG00000109390.13	chr4	-	3	4.40153	0.0171495	0.0938
ENSG00000100364.19	chr22	-	2	6.22882	0.0171657	0.0938
ENSG00000058668.15	chr1	+	2	6.1835	0.0175445	0.0955977
ENSG00000086200.17	chr5	+	2	6.1728	0.0176353	0.0958201
ENSG00000111640.15	chr12	+	3	4.36021	0.0177666	0.0962608
ENSG00000100320.23	chr22	-	2	6.13621	0.0179495	0.0967179
ENSG00000127483.19	chr1	-	2	6.13594	0.0179518	0.0967179
ENSG00000204267.16	chr6	-	2	6.10926	0.0181848	0.0973513
ENSG00000101333.18	chr20	+	2	6.10891	0.0181879	0.0973513
ENSG00000113575.10	chr5	-	2	6.10507	0.0182217	0.0973513
ENSG00000196313.11	chr7	+	2	6.09089	0.0183471	0.0976914
ENSG00000163660.12	chr3	-	2	6.08638	0.0183872	0.0976914
ENSG00000165929.13	chr14	-	2	6.06703	0.0185602	0.0983383
ENSG00000161013.17	chr5	-	2	6.05259	0.0186905	0.0987559
ENSG00000150593.18	chr10	+	2	6.03962	0.0188084	0.0991057
ENSG00000145860.12	chr5	-	2	6.02038	0.0189847	0.0997609
ENSG00000064042.18	chr4	+	3	4.27583	0.0190995	0.10009
ENSG00000088992.18	chr12	-	2	5.98031	0.0193577	0.100821
ENSG00000129353.15	chr19	+	2	5.97848	0.0193749	0.100821
ENSG00000127870.17	chr13	-	2	5.9672	0.0194815	0.100821
ENSG00000105514.8	chr19	-	2	5.96406	0.0195113	0.100821
ENSG00000182551.14	chr2	-	2	5.96255	0.0195256	0.100821
ENSG00000100242.15	chr22	-	3	4.24843	0.0195544	0.100821
ENSG00000185033.14	chr15	+	2	5.9374	0.0197659	0.101638
ENSG00000137801.11	chr15	+	2	5.92598	0.0198761	0.101932
ENSG00000101940.18	chrX	+	2	5.90834	0.0200477	0.102515
ENSG00000175866.15	chr17	+	2	5.9002	0.0201275	0.102515
ENSG00000166949.17	chr15	+	2	5.89788	0.0201502	0.102515
ENSG00000107798.18	chr10	-	2	5.88785	0.020249	0.102745
ENSG00000142546.14	chr19	-	2	5.87504	0.0203759	0.103076
ENSG00000097007.19	chr9	+	2	5.87007	0.0204254	0.103076
ENSG00000236404.10	chr9	-	3	4.19492	0.0204754	0.103076
ENSG00000184640.20	chr17	+	4	3.47893	0.0206278	0.103571
ENSG00000172403.11	chr4	+	2	5.84249	0.0207024	0.103674
ENSG00000169641.13	chr1	-	2	5.82664	0.0208634	0.104208
ENSG00000196502.12	chr16	-	2	5.81694	0.0209626	0.104432
ENSG00000008441.18	chr19	+	2	5.80051	0.0211318	0.105002
ENSG00000148396.18	chr9	-	2	5.76476	0.0215051	0.106581
ENSG00000113580.15	chr5	-	2	5.75554	0.0216026	0.106723
ENSG00000121361.5	chr12	-	2	5.74668	0.0216966	0.106723
ENSG00000085733.16	chr11	+	2	5.7463	0.0217007	0.106723
ENSG00000174851.16	chr11	-	2	5.73505	0.0218208	0.106986
ENSG00000164591.14	chr5	+	2	5.73085	0.0218658	0.106986
ENSG00000007237.19	chr17	-	4	3.42607	0.0219729	0.107237
ENSG00000166326.7	chr11	+	2	5.70506	0.0221445	0.1078
ENSG00000069275.13	chr1	-	2	5.65942	0.0226473	0.109968
ENSG00000109099.16	chr17	-	4	3.39619	0.0227723	0.110296
ENSG00000101335.10	chr20	+	3	4.05008	0.0232014	0.112091
ENSG00000135956.9	chr2	-	2	5.58986	0.0234374	0.112947
ENSG00000152700.14	chr5	-	2	5.55512	0.0238431	0.114503
ENSG00000232310.8	chr6	-	2	5.55202	0.0238797	0.114503
ENSG00000163681.16	chr3	+	4	3.3541	0.0239487	0.114505
ENSG00000140830.9	chr16	-	2	5.54192	0.0239994	0.114505
ENSG00000131828.14	chrX	+	2	5.51934	0.0242691	0.115144
ENSG00000204256.14	chr6	+	3	3.99473	0.0243403	0.115144
ENSG00000111077.18	chr12	+	3	3.99441	0.0243471	0.115144
ENSG00000108389.9	chr17	-	2	5.51067	0.0243735	0.115144
ENSG00000166925.9	chr7	-	2	5.49795	0.0245276	0.115455
ENSG00000241878.11	chr22	-	2	5.4953	0.0245598	0.115455
ENSG00000120896.13	chr8	+	3	3.9689	0.0248916	0.116729
ENSG00000185532.20	chr10	+	2	5.43187	0.0253454	0.118567
ENSG00000058056.10	chr3	+	3	3.94314	0.0254543	0.118787
ENSG00000124155.18	chr20	+	3	3.92646	0.0258257	0.120227
ENSG00000158352.17	chrX	-	2	5.38328	0.0259656	0.120586
ENSG00000168273.8	chr3	+	2	5.33987	0.0265336	0.122926
ENSG00000053254.16	chr14	-	3	3.88982	0.0266612	0.12322
ENSG00000166091.21	chr14	+	2	5.31608	0.0268507	0.123797
ENSG00000129657.16	chr17	+	3	3.87139	0.0270923	0.124612
ENSG00000069399.15	chr19	+	2	5.29043	0.0271971	0.124745
ENSG00000163697.17	chr4	-	3	3.86311	0.0272881	0.124745
ENSG00000110700.7	chr11	-	2	5.28169	0.0273163	0.124745
ENSG00000145362.20	chr4	+	5	2.88464	0.0274261	0.124949
ENSG00000100316.16	chr22	-	2	5.23292	0.0279917	0.127223
ENSG00000101276.18	chr20	-	2	5.22111	0.0281579	0.127676
ENSG00000168675.19	chr18	+	5	2.8618	0.0283813	0.128385
ENSG00000205090.9	chr1	-	2	5.19394	0.0285446	0.128516
ENSG00000132530.17	chr17	+	2	5.1823	0.028712	0.128516
ENSG00000061938.20	chr3	-	2	5.18201	0.0287162	0.128516
ENSG00000008294.21	chr17	-	2	5.18179	0.0287193	0.128516
ENSG00000166228.9	chr10	-	2	5.17999	0.0287453	0.128516
ENSG00000167994.13	chr11	-	2	5.16362	0.0289829	0.129277
ENSG00000141759.15	chr18	-	2	5.1582	0.0290619	0.129329
ENSG00000117616.18	chr1	-	2	5.13304	0.0294323	0.130674
ENSG00000198053.12	chr20	+	2	5.11567	0.029691	0.131518
ENSG00000232119.8	chrX	+	2	5.09457	0.0300085	0.132618
ENSG00000108953.17	chr17	-	2	5.07019	0.03038	0.133898
ENSG00000039523.20	chr16	+	2	5.06643	0.0304377	0.133898
ENSG00000143951.16	chr2	-	3	3.72151	0.0308766	0.135518
ENSG00000173163.10	chr2	+	2	5.01053	0.0313105	0.136923
ENSG00000144935.15	chr3	+	2	5.0087	0.0313396	0.136923
ENSG00000196535.17	chr17	-	2	4.99663	0.0315317	0.13745
ENSG00000090621.15	chr1	-	2	4.98268	0.0317554	0.138111
ENSG00000075624.17	chr7	-	2	4.97682	0.0318499	0.138208
ENSG00000081923.15	chr18	-	2	4.96789	0.0319945	0.138522
ENSG00000160194.18	chr21	+	2	4.94665	0.0323414	0.139709
ENSG00000146592.17	chr7	+	2	4.91304	0.0328986	0.141699
ENSG00000027075.15	chr14	+	2	4.90592	0.0330179	0.141699
ENSG00000136156.15	chr13	+	3	3.64475	0.0330237	0.141699
ENSG00000149591.17	chr11	+	2	4.89757	0.0331584	0.141932
ENSG00000138326.21	chr10	+	2	4.89357	0.033226	0.141932
ENSG00000221983.8	chr19	+	2	4.88005	0.0334557	0.142292
ENSG00000147684.10	chr8	+	2	4.87635	0.0335188	0.142292
ENSG00000116871.15	chr1	+	2	4.87108	0.0336089	0.142292
ENSG00000167291.16	chr17	-	2	4.86864	0.0336508	0.142292
ENSG00000105409.19	chr19	-	2	4.86621	0.0336923	0.142292
ENSG00000197360.9	chr19	-	2	4.86255	0.0337554	0.142292
ENSG00000115935.18	chr2	-	3	3.6044	0.0342139	0.143908
ENSG00000162591.16	chr1	-	2	4.82664	0.0343795	0.144172
ENSG00000135316.19	chr6	-	2	4.82395	0.0344268	0.144172
ENSG00000140264.21	chr15	+	3	3.58999	0.0346496	0.144788
ENSG00000115594.12	chr2	+	3	3.58093	0.0349266	0.145629
ENSG00000102317.18	chrX	+	2	4.79076	0.0350158	0.145684
ENSG00000079432.8	chr19	+	2	4.7833	0.0351497	0.145924
ENSG00000151914.21	chr6	-	6	2.50642	0.0352706	0.146068
ENSG00000121769.8	chr1	-	2	4.77294	0.0353366	0.146068
ENSG00000116171.19	chr1	+	2	4.75766	0.0356142	0.146824
ENSG00000167522.16	chr16	-	2	4.75073	0.0357409	0.146824
ENSG00000181830.9	chr11	+	2	4.74634	0.0358214	0.146824
ENSG00000130529.16	chr19	+	2	4.74611	0.0358257	0.146824
ENSG00000010278.15	chr12	+	2	4.73514	0.0360278	0.147249
ENSG00000163798.13	chr2	+	2	4.72818	0.0361566	0.147249
ENSG00000147573.17	chr8	+	2	4.72544	0.0362075	0.147249
ENSG00000160877.6	chr19	+	2	4.72218	0.0362682	0.147249
ENSG00000110047.18	chr11	-	2	4.71975	0.0363133	0.147249
ENSG00000177830.18	chr11	-	2	4.70927	0.0365092	0.147731
ENSG00000162909.18	chr1	+	2	4.70264	0.0366339	0.147924
ENSG00000148411.8	chr9	-	2	4.69703	0.0367397	0.148039
ENSG00000104529.17	chr8	-	2	4.69167	0.0368409	0.148136
ENSG00000224318.6	chr3	-	2	4.66417	0.0373658	0.14953
ENSG00000121057.13	chr17	+	2	4.6639	0.0373709	0.14953
ENSG00000213741.11	chr14	-	2	4.66127	0.0374215	0.14953
ENSG00000148700.15	chr10	+	3	3.49928	0.0375284	0.149645
ENSG00000167460.17	chr19	+	3	3.47485	0.0383454	0.152302
ENSG00000231607.13	chr13	-	2	4.61354	0.0383533	0.152302
ENSG00000174437.17	chr12	+	7	2.30811	0.0387094	0.153398
ENSG00000173511.10	chr11	+	2	4.58304	0.0389621	0.154081
ENSG00000005302.19	chrX	+	2	4.57115	0.0392023	0.154678
ENSG00000219626.9	chr2	+	2	4.56444	0.0393386	0.154678
ENSG00000115183.15	chr2	+	2	4.56364	0.0393549	0.154678
ENSG00000260549.2	chr16	+	2	4.55584	0.0395139	0.154705
ENSG00000138193.16	chr10	+	2	4.54976	0.0396384	0.154705
ENSG00000051620.11	chr6	+	2	4.54789	0.0396769	0.154705
ENSG00000170290.4	chr11	-	2	4.54379	0.0397611	0.154705
ENSG00000171853.16	chr2	+	3	3.43366	0.039765	0.154705
ENSG00000107771.17	chr10	+	2	4.53825	0.0398753	0.15482
ENSG00000198393.8	chr12	+	2	4.52017	0.0402507	0.155961
ENSG00000101752.12	chr18	+	3	3.41506	0.0404239	0.156317
ENSG00000168283.14	chr10	+	2	4.50717	0.0405229	0.156384
ENSG00000169756.16	chr2	+	3	3.39931	0.0409906	0.157537
ENSG00000137168.8	chr6	-	2	4.48445	0.0410034	0.157537
ENSG00000225733.6	chr3	-	2	4.48142	0.0410679	0.157537
ENSG00000160392.13	chr19	-	2	4.47446	0.0412167	0.157792
ENSG00000150938.10	chr2	+	2	4.4579	0.0415731	0.158839
ENSG00000078808.19	chr1	-	2	4.43365	0.0421008	0.160535
ENSG00000132561.14	chr8	+	2	4.43415	0.0422778	0.160796
ENSG00000122406.14	chr1	+	2	4.42292	0.0423367	0.160796
ENSG00000008710.20	chr16	-	2	4.41372	0.0425401	0.161249
ENSG00000140545.15	chr15	-	2	4.36399	0.0436584	0.165162
ENSG00000204310.13	chr6	-	2	4.35781	0.0437996	0.165369
ENSG00000110321.19	chr11	-	6	2.37964	0.0441116	0.16622
ENSG00000049759.20	chr18	+	2	4.33573	0.0443083	0.166634
ENSG00000133619.17	chr7	+	2	4.32828	0.0444812	0.166957
ENSG00000197063.11	chr17	-	2	4.31763	0.0447301	0.167563
ENSG00000198626.17	chr1	+	3	3.29799	0.0448391	0.167644
ENSG00000075239.14	chr11	+	3	3.29244	0.0450606	0.168145
ENSG00000167106.12	chr9	-	3	3.28761	0.0452542	0.168539
ENSG00000105227.16	chr19	-	2	4.2869	0.0454563	0.168964
ENSG00000134321.13	chr2	+	2	4.2791	0.0456427	0.169328
ENSG00000160180.16	chr21	-	2	4.26986	0.0458644	0.169822
ENSG00000153406.14	chr16	-	2	4.24707	0.046417	0.171537
ENSG00000132005.9	chr19	-	2	4.22402	0.0469831	0.17313
ENSG00000023734.11	chr12	+	2	4.21932	0.0470994	0.17313
ENSG00000172262.11	chr5	+	3	3.24037	0.0471936	0.17313
ENSG00000266412.6	chr10	-	2	4.2149	0.0472092	0.17313
ENSG00000139323.14	chr12	-	2	4.18853	0.0478696	0.175217
ENSG00000126883.17	chr9	+	2	4.17839	0.0481263	0.175821
ENSG00000106069.23	chr7	+	2	4.1537	0.0487578	0.17773
ENSG00000108515.18	chr17	+	2	4.15074	0.048834	0.17773
ENSG00000271952.2	chr2	+	2	4.12992	0.0493742	0.179356
ENSG00000051523.11	chr16	-	2	4.12492	0.049505	0.179465
ENSG00000143321.19	chr1	-	3	3.18467	0.0495915	0.179465
ENSG00000169155.10	chr9	+	2	4.11105	0.0498699	0.1801
ENSG00000196141.14	chr2	+	2	4.10784	0.0499547	0.1801
ENSG00000204954.10	chr12	-	2	4.08753	0.0504951	0.181707
ENSG00000127824.14	chr2	-	2	4.07338	0.0508755	0.182596
ENSG00000139132.15	chr12	+	4	2.7255	0.0509906	0.182596
ENSG00000213722.10	chr6	-	2	4.06774	0.0510279	0.182596
ENSG00000103852.13	chr15	-	2	4.06385	0.0511335	0.182633
ENSG00000284969.1	chr11	-	2	4.04917	0.0515336	0.18372
ENSG00000089159.17	chr12	-	2	4.03198	0.0520065	0.185062
ENSG00000106682.16	chr7	+	2	4.027	0.0521446	0.18521
ENSG00000196504.19	chr2	-	2	4.02333	0.0522465	0.185229
ENSG00000133069.17	chr1	+	3	3.1213	0.0524744	0.185693
ENSG00000133315.12	chr11	-	2	3.99199	0.0531255	0.187651
ENSG00000171631.16	chr11	+	3	3.09998	0.0534829	0.188566
ENSG00000136436.15	chr17	+	3	3.08386	0.0542591	0.190952
ENSG00000125746.18	chr19	-	2	3.94811	0.0543841	0.191042
ENSG00000077009.13	chr19	+	3	3.07261	0.0548076	0.192177
ENSG00000026025.16	chr10	+	3	3.06273	0.055294	0.193529
ENSG00000196588.20	chr22	-	2	3.91075	0.0554816	0.193832
ENSG00000104635.15	chr8	+	2	3.8951	0.0559488	0.195109
ENSG00000147065.17	chrX	+	2	3.88742	0.0561796	0.195558
ENSG00000115053.17	chr2	-	3	3.03669	0.0565976	0.196656
ENSG00000182199.11	chr12	+	3	3.02998	0.0569387	0.197483
ENSG00000002933.9	chr7	+	2	3.85844	0.0570598	0.197546
ENSG00000166402.9	chr11	+	2	3.84244	0.0575524	0.198893
ENSG00000172239.14	chr5	-	2	3.82974	0.0579468	0.199829
ENSG00000188522.15	chr17	-	2	3.82652	0.0580473	0.199829
ENSG00000105576.15	chr19	-	3	3.00588	0.0581814	0.199829
ENSG00000185567.7	chr14	-	2	3.81769	0.0583236	0.199829
ENSG00000101161.8	chr20	+	2	3.81698	0.0583461	0.199829
ENSG00000167792.13	chr11	+	3	3.00076	0.0584486	0.199829
ENSG00000187091.14	chr3	-	2	3.78914	0.0592277	0.202133
ENSG00000155366.17	chr1	-	2	3.77678	0.0596238	0.203123
ENSG00000112624.12	chr6	+	2	3.74231	0.060744	0.206573
ENSG00000067057.18	chr10	+	4	2.5778	0.0609387	0.206868
ENSG00000178127.13	chr18	+	3	2.94959	0.0611947	0.20737
ENSG00000156110.15	chr10	+	2	3.7229	0.0613851	0.207649
ENSG00000168214.21	chr4	+	2	3.71402	0.0616812	0.20805
ENSG00000137831.15	chr15	-	2	3.71284	0.0617207	0.20805
ENSG00000110422.12	chr11	+	2	3.70785	0.0618877	0.208247
ENSG00000166444.19	chr11	-	3	2.93292	0.062118	0.208612
ENSG00000047849.21	chr3	-	4	2.56065	0.0622139	0.208612
ENSG00000133878.9	chr8	-	2	3.68136	0.0627828	0.209935
ENSG00000134326.12	chr2	-	2	3.68006	0.0628272	0.209935
ENSG00000282221.1	chr1	+	2	3.67051	0.0631537	0.210276
ENSG00000166741.8	chr11	+	2	3.66777	0.0632476	0.210276
ENSG00000128487.18	chr17	+	2	3.66513	0.0633383	0.210276
ENSG00000066136.20	chr1	+	2	3.66427	0.0633679	0.210276
ENSG00000204217.15	chr2	+	2	3.65996	0.0635165	0.210405
ENSG00000178980.15	chr19	+	2	3.64876	0.0639045	0.211326
ENSG00000185022.12	chr22	+	2	3.6322	0.0644827	0.21287
ENSG00000169122.11	chr8	+	2	3.61814	0.064978	0.214137
ENSG00000102804.15	chr13	-	4	2.52207	0.0651798	0.214434
ENSG00000109381.20	chr4	-	2	3.60423	0.0654726	0.215028
ENSG00000087086.15	chr19	+	2	3.60082	0.0655942	0.215059
ENSG00000008130.15	chr1	-	2	3.59528	0.0657929	0.215224
ENSG00000117984.15	chr11	-	2	3.59317	0.0658688	0.215224
ENSG00000129009.13	chr15	+	2	3.58911	0.0660148	0.215334
ENSG00000159023.22	chr1	+	2	3.57079	0.0666783	0.217129
ENSG00000120333.4	chr1	-	2	3.5623	0.0669884	0.217769
ENSG00000135424.18	chr12	-	2	3.55571	0.0672301	0.218185
ENSG00000169375.16	chr15	-	2	3.54476	0.0676338	0.218888
ENSG00000105738.11	chr19	+	2	3.53707	0.0679193	0.218888
ENSG00000072310.17	chr17	-	2	3.53427	0.0680232	0.218888
ENSG00000157985.19	chr2	+	2	3.53244	0.0680914	0.218888
ENSG00000185201.17	chr11	+	2	3.53239	0.0680935	0.218888
ENSG00000166292.12	chr17	-	2	3.53137	0.0681316	0.218888
ENSG00000277258.5	chr17	-	2	3.51914	0.0685894	0.219991
ENSG00000082458.12	chrX	+	3	2.80995	0.0693905	0.222189
ENSG00000164951.16	chr8	+	2	3.48941	0.0697172	0.222792
ENSG00000175287.19	chr9	+	2	3.48696	0.0698112	0.222792
ENSG00000197971.16	chr18	-	3	2.79941	0.070054	0.223195
ENSG00000231721.7	chr7	-	2	3.47492	0.0702743	0.223384
ENSG00000168385.18	chr2	+	2	3.47307	0.0703461	0.223384
ENSG00000132205.11	chr18	+	2	3.45956	0.0708706	0.224677
ENSG00000169071.15	chr9	-	2	3.45652	0.0709893	0.224682
ENSG00000164093.17	chr4	-	2	3.45297	0.0711279	0.22475
ENSG00000116194.13	chr1	-	2	3.44772	0.0713336	0.225029
ENSG00000127472.11	chr1	+	2	3.43977	0.0716468	0.225646
ENSG00000117114.20	chr1	+	3	2.77106	0.0718704	0.225979
ENSG00000205560.13	chr22	-	2	3.42912	0.0720686	0.226232
ENSG00000080854.16	chr11	-	2	3.40309	0.0731109	0.228959
ENSG00000102606.18	chr13	+	4	2.42624	0.0731762	0.228959
ENSG00000143153.13	chr1	+	2	3.387	0.0737633	0.23042
ENSG00000130592.17	chr11	+	3	2.73805	0.0740481	0.230663
ENSG00000116675.16	chr1	+	2	3.37921	0.0740816	0.230663
ENSG00000134769.22	chr18	+	3	2.73477	0.0742679	0.230868
ENSG00000152217.20	chr18	+	2	3.36802	0.0745418	0.231345
ENSG00000160014.17	chr19	+	2	3.34952	0.0753093	0.23322
ENSG00000133067.18	chr1	+	3	2.71747	0.0754398	0.23322
ENSG00000213160.10	chr2	+	2	3.3447	0.0755106	0.23322
ENSG00000172348.15	chr6	-	2	3.33591	0.0758797	0.233983
ENSG00000117859.19	chr1	+	2	3.33155	0.0760632	0.234055
ENSG00000178951.9	chr19	-	2	3.32865	0.0761857	0.234055
ENSG00000060982.15	chr12	-	2	3.32668	0.0762691	0.234055
ENSG00000146112.12	chr6	-	3	2.7019	0.0765105	0.23442
ENSG00000062716.13	chr17	+	2	3.31285	0.0768569	0.234972
ENSG00000128591.16	chr7	+	2	3.31101	0.0769356	0.234972
ENSG00000085831.16	chr1	-	3	2.67156	0.0786432	0.239805
ENSG00000188176.12	chr17	+	2	3.26646	0.0788664	0.240104
ENSG00000106070.20	chr7	-	2	3.25537	0.079355	0.241209
ENSG00000131370.16	chr3	-	2	3.24157	0.0799682	0.242316
ENSG00000164597.15	chr7	-	3	2.65309	0.079972	0.242316
ENSG00000135486.19	chr12	+	2	3.23546	0.0802417	0.24249
ENSG00000136895.19	chr9	+	2	3.23455	0.0802822	0.24249
ENSG00000142173.16	chr21	+	4	2.34638	0.0805833	0.243017
ENSG00000170619.10	chr8	-	2	3.21682	0.0810815	0.244135
ENSG00000143702.16	chr1	-	2	3.19859	0.0819125	0.246251
ENSG00000003402.20	chr2	+	4	2.32979	0.0822135	0.246769
ENSG00000123080.12	chr1	+	2	3.18458	0.0825579	0.247416
ENSG00000267107.8	chr19	-	3	2.61397	0.082863	0.247688
ENSG00000109332.20	chr4	-	3	2.61339	0.082907	0.247688
ENSG00000213465.8	chr11	+	2	3.16998	0.0832363	0.248233
ENSG00000168916.15	chr5	-	3	2.6071	0.0833825	0.248233
ENSG00000149809.17	chr11	+	2	3.16482	0.0834777	0.248233
ENSG00000133401.16	chr5	+	2	3.1556	0.0839109	0.249135
ENSG00000124942.14	chr11	-	3	2.59607	0.0842223	0.24946
ENSG00000088387.19	chr13	-	2	3.14166	0.0845704	0.24946
ENSG00000139218.18	chr12	-	2	3.14164	0.0845714	0.24946
ENSG00000014641.21	chr2	+	2	3.13747	0.0847697	0.24946
ENSG00000170892.13	chr19	+	2	3.13457	0.0849081	0.24946
ENSG00000072210.19	chr17	+	2	3.13409	0.0849309	0.24946
ENSG00000156650.14	chr10	+	2	3.13409	0.084931	0.24946
ENSG00000126246.10	chr19	-	2	3.12801	0.0852217	0.249718
ENSG00000123349.15	chr12	+	2	3.12587	0.0853243	0.249718
ENSG00000108852.15	chr17	-	2	3.12411	0.0854092	0.249718
ENSG00000100354.21	chr22	+	2	3.09765	0.0866912	0.252962
ENSG00000163820.15	chr3	-	2	3.09335	0.0869018	0.252962
ENSG00000126247.11	chr19	+	3	2.56148	0.0869146	0.252962
ENSG00000196924.19	chrX	-	3	2.55881	0.0871261	0.253194
ENSG00000266173.7	chr17	-	2	3.08567	0.087279	0.253254
ENSG00000125834.13	chr20	+	2	3.07231	0.08794	0.254787
ENSG00000127838.14	chr2	+	3	2.5454	0.0881964	0.255144
ENSG00000198105.16	chr10	-	2	3.05555	0.0887765	0.256436
ENSG00000166532.16	chr12	+	2	3.04651	0.0892317	0.257363
ENSG00000167491.17	chr19	+	2	3.03876	0.0896238	0.258106
ENSG00000027001.10	chr13	-	2	3.03425	0.089853	0.258378
ENSG00000177426.22	chr18	+	3	2.5076	0.0912873	0.262109
ENSG00000122550.18	chr7	+	2	3.00059	0.0915844	0.262569
ENSG00000140795.13	chr16	-	4	2.23431	0.092257	0.264103
ENSG00000186815.13	chr12	+	2	2.97402	0.0929779	0.26577
ENSG00000129675.16	chrX	-	2	2.96572	0.0934179	0.26663
ENSG00000116128.11	chr1	+	2	2.9582	0.0938186	0.267376
ENSG00000225663.8	chr17	-	2	2.91746	0.0960243	0.273256
ENSG00000089157.16	chr12	-	2	2.91249	0.0962975	0.273628
ENSG00000147403.18	chrX	+	2	2.88483	0.0978336	0.277581
ENSG00000076770.14	chrX	-	2	2.8819	0.0979978	0.277636
ENSG00000166317.12	chr10	-	2	2.87668	0.0982912	0.278057
ENSG00000040341.18	chr8	-	2	2.86543	0.0989271	0.279443
ENSG00000203879.12	chrX	+	3	2.40708	0.100067	0.282248
ENSG00000166965.12	chr15	+	2	2.84075	0.100339	0.2826
ENSG00000102316.17	chrX	+	3	2.40142	0.100586	0.282881
ENSG00000157654.19	chr9	+	7	1.81386	0.102644	0.288246
ENSG00000128739.23	chr15	+	3	2.37483	0.103065	0.289005
ENSG00000136942.15	chr9	-	3	2.37276	0.103262	0.289133
ENSG00000172845.17	chr2	-	3	2.37077	0.10345	0.289237
ENSG00000185650.10	chr14	-	2	2.77994	0.103916	0.290118
ENSG00000089876.12	chr10	-	2	2.77579	0.104165	0.29039
ENSG00000099917.17	chr22	+	3	2.35982	0.104493	0.290882
ENSG00000145675.15	chr5	+	5	1.98202	0.104915	0.291515
ENSG00000036672.16	chr11	-	4	2.12687	0.105024	0.291515
ENSG00000008838.20	chr17	-	2	2.74948	0.105762	0.293108
ENSG00000151726.15	chr4	-	3	2.34519	0.105904	0.293108
ENSG00000138185.20	chr10	+	2	2.74304	0.106157	0.293386
ENSG00000182326.15	chr12	+	2	2.73735	0.106508	0.29393
ENSG00000069020.18	chr5	+	4	2.1102	0.107157	0.295296
ENSG00000103091.15	chr16	-	2	2.72219	0.107448	0.295473
ENSG00000100418.8	chr22	-	2	2.7209	0.107529	0.295473
ENSG00000088682.14	chr16	+	2	2.71508	0.107892	0.296047
ENSG00000170153.11	chr4	-	2	2.70566	0.108484	0.297246
ENSG00000074181.9	chr19	-	2	2.69339	0.109261	0.298897
ENSG00000137767.14	chr15	+	2	2.69122	0.109398	0.298897
ENSG00000110237.5	chr11	+	2	2.6853	0.109776	0.299502
ENSG00000095794.19	chr10	+	3	2.30357	0.110028	0.299765
ENSG00000109846.9	chr11	-	4	2.08677	0.110226	0.299878
ENSG00000138867.17	chr22	-	2	2.67289	0.110572	0.300393
ENSG00000164125.16	chr4	-	2	2.66881	0.110835	0.300681
ENSG00000197714.9	chr19	+	2	2.66365	0.111169	0.300778
ENSG00000137501.17	chr11	-	2	2.66341	0.111184	0.300778
ENSG00000115998.8	chr2	-	2	2.65301	0.111861	0.301936
ENSG00000132329.11	chr2	+	2	2.65199	0.111927	0.301936
ENSG00000186111.11	chr19	-	2	2.64356	0.11248	0.30265
ENSG00000245060.8	chr5	+	2	2.64313	0.112507	0.30265
ENSG00000285938.1	chr3	+	2	2.63579	0.112991	0.303525
ENSG00000078596.11	chrX	-	2	2.63298	0.113177	0.3036
ENSG00000169925.17	chr9	-	2	2.62597	0.113642	0.30442
ENSG00000196405.13	chr14	+	3	2.25591	0.114955	0.30751
ENSG00000079819.19	chr6	-	2	2.58712	0.116257	0.31056
ENSG00000177666.17	chr11	+	2	2.5812	0.116662	0.311207
ENSG00000055163.20	chr5	+	2	2.5767	0.116971	0.311352
ENSG00000108946.15	chr17	+	4	2.03698	0.117041	0.311352
ENSG00000159720.12	chr16	-	2	2.57188	0.117303	0.311416
ENSG00000170634.13	chr2	+	3	2.2318	0.117535	0.311416
ENSG00000086666.19	chr15	+	2	2.56826	0.117552	0.311416
ENSG00000143799.14	chr1	-	2	2.56522	0.117762	0.311543
ENSG00000160808.11	chr3	-	2	2.55097	0.118754	0.313732
ENSG00000251247.11	chr19	+	2	2.54734	0.119008	0.313971
ENSG00000158321.18	chr7	+	3	2.20818	0.120121	0.316472
ENSG00000186635.15	chr11	-	3	2.2062	0.12034	0.316615
ENSG00000172613.8	chr11	+	2	2.52548	0.120551	0.316735
ENSG00000100605.17	chr14	-	2	2.52254	0.120761	0.316852
ENSG00000157514.16	chrX	-	2	2.51578	0.121243	0.317052
ENSG00000167863.12	chr17	-	2	2.51498	0.1213	0.317052
ENSG00000146834.14	chr7	+	2	2.51453	0.121333	0.317052
ENSG00000067182.8	chr12	-	2	2.51096	0.121589	0.317234
ENSG00000130429.15	chr7	+	2	2.50895	0.121733	0.317234
ENSG00000175699.15	chr14	+	2	2.50076	0.122324	0.318271
ENSG00000258289.9	chr14	+	2	2.49883	0.122463	0.318271
ENSG00000163485.17	chr1	+	2	2.47288	0.124359	0.322762
ENSG00000115194.11	chr2	-	2	2.46952	0.124607	0.322965
ENSG00000189403.15	chr13	-	4	1.98384	0.124774	0.322965
ENSG00000159842.15	chr17	-	5	1.8612	0.125124	0.323433
ENSG00000008056.14	chrX	-	2	2.4458	0.126374	0.326117
ENSG00000139117.14	chr12	-	2	2.4441	0.126502	0.326117
ENSG00000018625.15	chr1	+	2	2.42547	0.127911	0.328998
ENSG00000196230.14	chr6	+	2	2.42479	0.127963	0.328998
ENSG00000053747.17	chr18	+	3	2.12437	0.129782	0.333228
ENSG00000118263.15	chr2	-	2	2.39615	0.130167	0.33377
ENSG00000124772.12	chr6	-	3	2.11704	0.130664	0.334596
ENSG00000119314.16	chr9	-	2	2.38532	0.131011	0.33504
ENSG00000163092.21	chr2	+	2	2.3776	0.131617	0.33614
ENSG00000136574.18	chr8	+	3	2.10569	0.132043	0.336663
ENSG00000182809.11	chr14	+	3	2.10434	0.132207	0.336663
ENSG00000130304.17	chr19	+	2	2.36834	0.132348	0.336663
ENSG00000196498.13	chr12	-	4	1.93092	0.132975	0.337614
ENSG00000138639.18	chr4	+	2	2.35921	0.133074	0.337614
ENSG00000160072.20	chr1	+	2	2.34946	0.133854	0.339143
ENSG00000167680.17	chr19	-	2	2.34169	0.134479	0.339174
ENSG00000187773.9	chr18	-	2	2.33983	0.13463	0.339174
ENSG00000198589.14	chr4	-	2	2.3397	0.134639	0.339174
ENSG00000241058.4	chr10	-	2	2.33934	0.134669	0.339174
ENSG00000075914.13	chr3	+	2	2.33834	0.13475	0.339174
ENSG00000048052.23	chr7	+	4	1.9171	0.135203	0.339869
ENSG00000115290.10	chr2	-	2	2.31991	0.13625	0.342052
ENSG00000243156.9	chr22	-	2	2.30959	0.137098	0.342837
ENSG00000283154.2	chr3	+	2	2.30913	0.137137	0.342837
ENSG00000177000.13	chr1	-	4	1.90525	0.137142	0.342837
ENSG00000168000.15	chr11	-	2	2.30533	0.137451	0.342837
ENSG00000010818.10	chr6	-	2	2.30458	0.137513	0.342837
ENSG00000117419.16	chr1	-	2	2.30173	0.137749	0.342837
ENSG00000123815.13	chr19	-	4	1.90119	0.137814	0.342837
ENSG00000065802.12	chr2	+	2	2.28037	0.139535	0.346321
ENSG00000166025.18	chr11	+	2	2.27988	0.139576	0.346321
ENSG00000160801.14	chr3	+	2	2.2656	0.140786	0.348345
ENSG00000101210.13	chr20	-	3	2.03533	0.140933	0.348345
ENSG00000175029.17	chr10	-	2	2.26383	0.140936	0.348345
ENSG00000250608.2	chr3	-	2	2.25826	0.141411	0.348848
ENSG00000185088.14	chr15	-	2	2.25719	0.141504	0.348848
ENSG00000185825.17	chrX	-	2	2.25403	0.141774	0.349027
ENSG00000156802.13	chr8	-	2	2.25209	0.14194	0.349027
ENSG00000073910.23	chr13	+	5	1.77234	0.142305	0.349037
ENSG00000105438.9	chr19	-	2	2.24659	0.142414	0.349037
ENSG00000163882.9	chr3	+	2	2.24571	0.14249	0.349037
ENSG00000115365.12	chr2	-	2	2.23715	0.143231	0.350268
ENSG00000275131.3	chr1	-	2	2.23569	0.143358	0.350268
ENSG00000136560.14	chr2	+	2	2.23045	0.143814	0.350698
ENSG00000173175.15	chr3	-	3	2.01288	0.143899	0.350698
ENSG00000164054.15	chr3	-	2	2.22377	0.144399	0.351468
ENSG00000171444.18	chr5	-	3	2.00477	0.144987	0.352452
ENSG00000168386.18	chr3	-	2	2.2094	0.145664	0.353651
ENSG00000144711.16	chr3	-	3	1.99364	0.146492	0.355212
ENSG00000197905.10	chr12	+	2	2.19684	0.146782	0.355464
ENSG00000167074.15	chr22	+	2	2.19119	0.147288	0.356239
ENSG00000247596.10	chr3	-	2	2.17456	0.148789	0.35911
ENSG00000137275.16	chr6	+	2	2.17275	0.148953	0.35911
ENSG00000082438.18	chr2	-	2	2.17049	0.149159	0.35911
ENSG00000198157.11	chrX	-	2	2.16978	0.149223	0.35911
ENSG00000099991.18	chr22	+	2	2.15771	0.150328	0.361229
ENSG00000198336.9	chr17	+	3	1.96473	0.150481	0.361229
ENSG00000156030.13	chr14	-	2	2.14856	0.151171	0.362433
ENSG00000145779.8	chr5	+	2	2.14464	0.151534	0.362669
ENSG00000105426.17	chr19	-	4	1.82152	0.151648	0.362669
ENSG00000017260.20	chr3	+	2	2.13893	0.152065	0.363214
ENSG00000135636.14	chr2	+	2	2.13552	0.152383	0.363521
ENSG00000123143.13	chr19	+	2	2.13085	0.15282	0.36411
ENSG00000106631.8	chr7	-	2	2.1149	0.154323	0.367234
ENSG00000250722.6	chr5	-	2	2.10543	0.155224	0.36882
ENSG00000187535.14	chr16	-	2	2.10386	0.155374	0.36882
ENSG00000050820.17	chr16	-	3	1.91715	0.157292	0.372913
ENSG00000198947.17	chrX	-	3	1.91567	0.157509	0.372966
ENSG00000120071.15	chr17	-	2	2.07573	0.158088	0.373669
ENSG00000130024.15	chr6	-	2	2.07463	0.158195	0.373669
ENSG00000141013.17	chr16	+	2	2.06954	0.158693	0.374286
ENSG00000084070.12	chr1	+	2	2.06671	0.158971	0.374286
ENSG00000136143.16	chr13	-	2	2.06598	0.159042	0.374286
ENSG00000152556.17	chr12	+	5	1.69351	0.159395	0.374657
ENSG00000164741.15	chr8	-	3	1.89722	0.16024	0.376058
ENSG00000162599.17	chr1	+	2	2.05239	0.160383	0.376058
ENSG00000159131.17	chr21	-	2	2.03391	0.162229	0.379557
ENSG00000154556.18	chr4	-	7	1.57029	0.162337	0.379557
ENSG00000161203.13	chr3	+	2	2.02974	0.162648	0.379557
ENSG00000160710.18	chr1	-	2	2.02955	0.162667	0.379557
ENSG00000105202.9	chr19	-	2	2.02684	0.162941	0.379733
ENSG00000134243.12	chr1	-	3	1.87551	0.163515	0.38061
ENSG00000189350.13	chr2	+	2	2.01867	0.163768	0.380736
ENSG00000254772.10	chr11	-	2	2.01159	0.16449	0.381883
ENSG00000136237.19	chr7	-	2	2.00993	0.164659	0.381883
ENSG00000145730.20	chr5	+	6	1.60874	0.164965	0.382129
ENSG00000137449.17	chr4	+	2	2.00059	0.165619	0.382861
ENSG00000184601.11	chr14	+	2	1.99999	0.16568	0.382861
ENSG00000120616.16	chr10	-	2	1.99262	0.166442	0.383799
ENSG00000117228.11	chr1	-	2	1.99219	0.166487	0.383799
ENSG00000126217.21	chr13	+	2	1.99023	0.16669	0.383806
ENSG00000111341.10	chr12	-	2	1.98338	0.167402	0.384985
ENSG00000108984.15	chr17	+	2	1.97223	0.168571	0.386809
ENSG00000185624.16	chr17	-	3	1.84253	0.168627	0.386809
ENSG00000186020.13	chr19	-	2	1.97005	0.168801	0.386809
ENSG00000131018.24	chr6	-	4	1.72855	0.169514	0.387742
ENSG00000119912.18	chr10	-	2	1.96237	0.169612	0.387742
ENSG00000150347.17	chr10	+	2	1.95942	0.169925	0.387996
ENSG00000164091.12	chr3	-	2	1.95672	0.170211	0.388187
ENSG00000106025.9	chr7	-	2	1.95369	0.170535	0.388463
ENSG00000101605.13	chr18	-	2	1.94453	0.171515	0.390231
ENSG00000108654.16	chr17	-	4	1.71581	0.172118	0.39114
ENSG00000233237.8	chr6	-	2	1.93577	0.172458	0.391449
ENSG00000152795.18	chr4	-	2	1.92995	0.173088	0.392023
ENSG00000181031.16	chr17	-	2	1.92967	0.173119	0.392023
ENSG00000077092.19	chr3	+	2	1.91509	0.17471	0.395159
ENSG00000115641.19	chr2	-	3	1.80212	0.175116	0.395609
ENSG00000240771.8	chr12	+	2	1.89016	0.177473	0.400446
ENSG00000096696.14	chr6	+	2	1.88836	0.177674	0.400446
ENSG00000108848.16	chr17	+	3	1.78341	0.178208	0.400891
ENSG00000114853.15	chr3	+	2	1.88288	0.17829	0.400891
ENSG00000183010.17	chr17	-	2	1.87713	0.178938	0.401877
ENSG00000198959.12	chr20	-	2	1.87228	0.179486	0.402637
ENSG00000070831.17	chr1	+	2	1.86114	0.180754	0.404791
ENSG00000198276.16	chr20	-	2	1.85938	0.180956	0.404791
ENSG00000135090.14	chr12	-	2	1.85691	0.181239	0.404791
ENSG00000186260.17	chr16	+	3	1.76508	0.181291	0.404791
ENSG00000198363.18	chr8	-	3	1.76238	0.181749	0.40495
ENSG00000126457.22	chr19	+	3	1.76218	0.181784	0.40495
ENSG00000076242.16	chr3	+	2	1.84847	0.18221	0.405428
ENSG00000087274.17	chr4	+	3	1.7547	0.183062	0.406852
ENSG00000141127.15	chr17	+	2	1.82981	0.184378	0.409303
ENSG00000173918.15	chr17	+	5	1.58702	0.185554	0.411436
ENSG00000160972.9	chr8	+	2	1.81212	0.186464	0.412976
ENSG00000105711.13	chr19	+	2	1.80797	0.186957	0.413234
ENSG00000167797.8	chr11	-	2	1.80752	0.187011	0.413234
ENSG00000106617.15	chr7	-	4	1.64433	0.187458	0.413746
ENSG00000104325.7	chr8	+	2	1.79246	0.188815	0.416043
ENSG00000084093.19	chr4	+	2	1.79148	0.188933	0.416043
ENSG00000244274.8	chr20	+	3	1.7196	0.189185	0.41612
ENSG00000076555.15	chr12	+	4	1.63334	0.189931	0.416954
ENSG00000076108.12	chr12	-	2	1.78267	0.189999	0.416954
ENSG00000198964.14	chr10	-	2	1.78079	0.190227	0.416978
ENSG00000095066.12	chr19	-	3	1.71213	0.190515	0.417132
ENSG00000172346.15	chr22	+	2	1.76923	0.191638	0.419112
ENSG00000145703.16	chr5	+	2	1.76633	0.191994	0.419414
ENSG00000136699.20	chr2	-	2	1.7611	0.192639	0.420326
ENSG00000170345.10	chr14	+	2	1.75861	0.193275	0.420326
ENSG00000188677.15	chr22	+	2	1.75539	0.193345	0.420326
ENSG00000188191.15	chr7	-	2	1.75388	0.193532	0.420326
ENSG00000074416.14	chr3	-	2	1.75181	0.193789	0.420326
ENSG00000167468.18	chr19	+	2	1.75085	0.193908	0.420326
ENSG00000073670.14	chr17	+	2	1.75055	0.193946	0.420326
ENSG00000186577.14	chr6	-	2	1.74205	0.195007	0.421471
ENSG00000145012.13	chr3	+	3	1.68726	0.195013	0.421471
ENSG00000151150.22	chr10	-	4	1.61067	0.195134	0.421471
ENSG00000081189.16	chr5	-	2	1.73736	0.195596	0.421555
ENSG00000151135.10	chr12	+	2	1.73653	0.1957	0.421555
ENSG00000178573.7	chr16	-	2	1.73526	0.195859	0.421555
ENSG00000139160.13	chr12	+	2	1.73374	0.196052	0.421555
ENSG00000085276.19	chr3	-	3	1.67293	0.197656	0.424528
ENSG00000100266.19	chr22	-	2	1.71579	0.19833	0.425501
ENSG00000092969.12	chr1	+	2	1.71304	0.198682	0.425778
ENSG00000161642.18	chr12	-	2	1.70969	0.199112	0.426015
ENSG00000179950.14	chr8	-	2	1.70486	0.199734	0.426015
ENSG00000179010.15	chr4	+	2	1.7029	0.199986	0.426015
ENSG00000157600.12	chrX	+	2	1.70185	0.200122	0.426015
ENSG00000110871.15	chr12	-	2	1.69998	0.200363	0.426015
ENSG00000204084.13	chr1	-	2	1.69884	0.200511	0.426015
ENSG00000120690.16	chr13	-	2	1.69875	0.200524	0.426015
ENSG00000079277.22	chr1	-	2	1.69771	0.200658	0.426015
ENSG00000099875.16	chr19	-	2	1.69668	0.200791	0.426015
ENSG00000100888.15	chr14	-	2	1.69276	0.201301	0.426624
ENSG00000093183.14	chr3	-	2	1.69067	0.201573	0.426729
ENSG00000137507.11	chr11	-	2	1.68609	0.202172	0.427526
ENSG00000117298.16	chr1	-	3	1.6415	0.203583	0.430035
ENSG00000080493.18	chr4	+	2	1.67262	0.203944	0.430324
ENSG00000182177.14	chr2	-	2	1.66888	0.204439	0.430895
ENSG00000106608.17	chr7	-	2	1.65223	0.206663	0.43473
ENSG00000140350.15	chr15	-	2	1.65138	0.206776	0.43473
ENSG00000105483.18	chr19	-	2	1.65018	0.206939	0.43473
ENSG00000185973.12	chrX	-	2	1.64751	0.207298	0.435009
ENSG00000077157.22	chr1	+	2	1.63389	0.209146	0.438407
ENSG00000068831.19	chr11	-	3	1.6015	0.211393	0.442098
ENSG00000132405.19	chr4	+	2	1.61694	0.211473	0.442098
ENSG00000181894.15	chr19	-	2	1.6146	0.211798	0.442098
ENSG00000165912.16	chr11	-	2	1.61437	0.211829	0.442098
ENSG00000038274.17	chr5	+	2	1.60687	0.212872	0.443791
ENSG00000234438.5	chr15	+	2	1.60464	0.213183	0.443957
ENSG00000159128.15	chr21	+	2	1.59991	0.213844	0.444852
ENSG00000108924.14	chr17	+	3	1.58689	0.214324	0.445367
ENSG00000138640.15	chr4	-	2	1.58934	0.215332	0.446976
ENSG00000092871.17	chr17	-	2	1.58287	0.216249	0.447656
ENSG00000017797.13	chr18	+	2	1.58192	0.216383	0.447656
ENSG00000167766.19	chr19	-	2	1.58087	0.216533	0.447656
ENSG00000100124.15	chr22	-	2	1.58045	0.216592	0.447656
ENSG00000104824.18	chr19	-	2	1.56868	0.218277	0.450652
ENSG00000177200.17	chr16	+	4	1.51416	0.218859	0.451368
ENSG00000119699.8	chr14	-	2	1.55568	0.220154	0.453551
ENSG00000162496.9	chr1	-	2	1.55359	0.220459	0.453686
ENSG00000075785.14	chr3	+	3	1.55583	0.220693	0.453686
ENSG00000166206.15	chr15	-	2	1.53955	0.222514	0.456715
ENSG00000166508.18	chr7	-	2	1.53867	0.222643	0.456715
ENSG00000160408.15	chr9	-	2	1.53349	0.223409	0.457797
ENSG00000090006.18	chr19	+	3	1.53981	0.224054	0.458427
ENSG00000086848.15	chr11	-	2	1.52818	0.224194	0.458427
ENSG00000107104.20	chr9	+	2	1.52649	0.224447	0.458455
ENSG00000198728.11	chr10	-	2	1.52195	0.225123	0.459346
ENSG00000111846.19	chr6	+	3	1.53193	0.225729	0.460014
ENSG00000132466.19	chr4	-	2	1.51331	0.226418	0.460014
ENSG00000069424.15	chr1	+	3	1.52821	0.226523	0.460014
ENSG00000119383.21	chr9	+	3	1.52731	0.226715	0.460014
ENSG00000100664.11	chr14	+	2	1.5073	0.227324	0.460014
ENSG00000198563.14	chr6	-	2	1.5072	0.227339	0.460014
ENSG00000188554.15	chr17	+	2	1.50666	0.227421	0.460014
ENSG00000198844.12	chr17	+	2	1.50636	0.227466	0.460014
ENSG00000204681.11	chr6	-	2	1.50542	0.227609	0.460014
ENSG00000204580.13	chr6	+	2	1.4976	0.228796	0.461927
ENSG00000018189.13	chr4	+	2	1.49509	0.229179	0.462213
ENSG00000180628.15	chr10	+	2	1.49008	0.229945	0.463022
ENSG00000108622.11	chr17	-	2	1.48931	0.230063	0.463022
ENSG00000176946.12	chr2	-	2	1.48283	0.231059	0.464541
ENSG00000179409.11	chr17	-	2	1.46665	0.233572	0.4691
ENSG00000101294.18	chr20	+	2	1.46348	0.234069	0.469607
ENSG00000172831.14	chr16	+	2	1.45397	0.235565	0.471778
ENSG00000156298.13	chrX	+	2	1.45348	0.235643	0.471778
ENSG00000050165.18	chr11	-	3	1.48381	0.236232	0.472463
ENSG00000275215.1	chr21	+	2	1.4428	0.237337	0.47418
ENSG00000181409.14	chr17	-	2	1.43793	0.238116	0.47524
ENSG00000177628.16	chr1	-	2	1.42798	0.239717	0.477741
ENSG00000224051.7	chr1	+	2	1.42628	0.239991	0.477741
ENSG00000137502.10	chr11	-	2	1.42551	0.240116	0.477741
ENSG00000123600.20	chr2	-	2	1.42339	0.24046	0.477849
ENSG00000156256.15	chr21	+	2	1.4221	0.240668	0.477849
ENSG00000083845.9	chr19	+	2	1.41679	0.241532	0.479068
ENSG00000138347.16	chr10	+	2	1.41045	0.242568	0.480625
ENSG00000133943.21	chr14	+	2	1.40852	0.242885	0.480757
ENSG00000179335.19	chr15	+	2	1.40603	0.243294	0.480836
ENSG00000172380.6	chr1	-	2	1.40523	0.243426	0.480836
ENSG00000167641.11	chr19	-	2	1.39949	0.244373	0.481457
ENSG00000100628.12	chr14	-	2	1.39887	0.244476	0.481457
ENSG00000198521.12	chr19	-	2	1.39876	0.244494	0.481457
ENSG00000109670.16	chr4	-	3	1.44414	0.24527	0.481957
ENSG00000107796.13	chr10	-	2	1.39247	0.245539	0.481957
ENSG00000165629.20	chr10	+	3	1.44208	0.245749	0.481957
ENSG00000169045.17	chr5	-	2	1.39036	0.245889	0.481957
ENSG00000068308.14	chrX	-	2	1.38967	0.246004	0.481957
ENSG00000150093.20	chr10	-	2	1.38711	0.246432	0.482302
ENSG00000146147.15	chr6	+	2	1.38315	0.247096	0.482482
ENSG00000183230.17	chr10	-	2	1.38214	0.247265	0.482482
ENSG00000156265.16	chr21	+	2	1.38021	0.247589	0.482482
ENSG00000177119.17	chr12	+	2	1.37955	0.2477	0.482482
ENSG00000185437.14	chr21	+	3	1.43335	0.24779	0.482482
ENSG00000101246.20	chr20	-	2	1.37757	0.248033	0.482482
ENSG00000159176.14	chr1	-	2	1.37253	0.248885	0.483649
ENSG00000181722.17	chr3	-	3	1.42588	0.24955	0.48445
ENSG00000137843.12	chr15	+	2	1.36668	0.249878	0.484597
ENSG00000173065.13	chr17	-	2	1.36073	0.250892	0.486072
ENSG00000242125.3	chr1	+	2	1.35855	0.251266	0.486306
ENSG00000151276.23	chr3	-	2	1.35366	0.252106	0.487438
ENSG00000130940.15	chr1	-	2	1.35144	0.252488	0.487685
ENSG00000105223.20	chr19	+	3	1.40899	0.253581	0.488989
ENSG00000141298.19	chr17	-	2	1.34459	0.253672	0.488989
ENSG00000124181.14	chr20	+	2	1.33951	0.254555	0.490197
ENSG00000163694.15	chr4	-	2	1.33677	0.255034	0.490448
ENSG00000269113.4	chr1	-	2	1.33583	0.255197	0.490448
ENSG00000249307.7	chr4	+	2	1.32578	0.256962	0.493347
ENSG00000142507.10	chr17	+	2	1.32298	0.257455	0.493366
ENSG00000134871.19	chr13	+	2	1.32269	0.257506	0.493366
ENSG00000074964.17	chr1	+	2	1.32135	0.257744	0.493366
ENSG00000172354.10	chr7	+	2	1.3161	0.258675	0.494655
ENSG00000151067.22	chr12	+	2	1.31279	0.259264	0.495106
ENSG00000171877.21	chr15	-	2	1.31188	0.259427	0.495106
ENSG00000163565.19	chr1	+	4	1.36526	0.260959	0.497533
ENSG00000185010.15	chrX	-	2	1.29422	0.262603	0.499709
ENSG00000114126.18	chr3	-	3	1.37208	0.262621	0.499709
ENSG00000160360.13	chr9	+	3	1.36636	0.264051	0.501933
ENSG00000154262.13	chr17	-	2	1.28166	0.264892	0.502565
ENSG00000204482.11	chr6	+	2	1.28064	0.265079	0.502565
ENSG00000149131.17	chr11	+	2	1.27723	0.265705	0.502565
ENSG00000060656.20	chr1	+	2	1.27712	0.265726	0.502565
ENSG00000177380.14	chr19	+	2	1.27673	0.265797	0.502565
ENSG00000179632.10	chr8	+	2	1.27532	0.266057	0.502565
ENSG00000130844.19	chr19	+	2	1.27333	0.266425	0.502565
ENSG00000268858.2	chr20	-	2	1.27303	0.26648	0.502565
ENSG00000105643.10	chr19	+	3	1.35524	0.266856	0.502626
ENSG00000105607.13	chr19	+	2	1.27002	0.267037	0.502626
ENSG00000082014.17	chr7	-	2	1.2678	0.267448	0.502906
ENSG00000133065.11	chr1	-	2	1.26532	0.267908	0.503278
ENSG00000170989.10	chr1	+	2	1.2516	0.270476	0.507605
ENSG00000175832.13	chr17	-	2	1.24029	0.272615	0.51112
ENSG00000127084.19	chr9	+	2	1.23782	0.273085	0.511502
ENSG00000133460.19	chr22	+	2	1.23428	0.273762	0.511662
ENSG00000104872.11	chr19	-	2	1.23358	0.273894	0.511662
ENSG00000261371.6	chr17	-	2	1.23318	0.273971	0.511662
ENSG00000114867.22	chr3	+	3	1.32525	0.274576	0.512292
ENSG00000164050.13	chr3	-	2	1.22768	0.275027	0.512532
ENSG00000015153.15	chr12	-	2	1.22658	0.275239	0.512532
ENSG00000102547.19	chr13	-	2	1.2251	0.275523	0.512564
ENSG00000114993.17	chr2	-	2	1.22244	0.276037	0.513022
ENSG00000108107.15	chr19	+	2	1.22091	0.276333	0.513034
ENSG00000057657.17	chr6	+	2	1.21964	0.276578	0.513034
ENSG00000172824.16	chr16	+	2	1.21332	0.277807	0.513929
ENSG00000187239.17	chr9	-	2	1.2133	0.27781	0.513929
ENSG00000100106.22	chr22	+	2	1.21302	0.277865	0.513929
ENSG00000114480.13	chr3	-	2	1.20298	0.279831	0.517068
ENSG00000126709.16	chr1	-	2	1.19831	0.280752	0.518271
ENSG00000168883.20	chr2	+	2	1.19283	0.281836	0.519772
ENSG00000124788.19	chr6	-	2	1.18903	0.282593	0.520666
ENSG00000136153.20	chr13	+	3	1.29384	0.282912	0.520753
ENSG00000124422.12	chr17	-	2	1.18205	0.283987	0.521556
ENSG00000184752.13	chr12	-	2	1.18077	0.284245	0.521556
ENSG00000166068.13	chr15	+	2	1.18038	0.284323	0.521556
ENSG00000172270.22	chr19	+	5	1.28045	0.284436	0.521556
ENSG00000171992.13	chr5	+	3	1.28449	0.285441	0.522899
ENSG00000234520.6	chr7	-	2	1.17097	0.286221	0.523829
ENSG00000226688.7	chr10	-	2	1.16703	0.28702	0.52479
ENSG00000135926.15	chr2	-	4	1.27908	0.288712	0.52738
ENSG00000087008.16	chr4	-	2	1.1571	0.289049	0.527494
ENSG00000012061.16	chr19	-	5	1.26721	0.289605	0.527562
ENSG00000136108.15	chr13	+	2	1.15424	0.289636	0.527562
ENSG00000132849.21	chr1	+	2	1.15111	0.290282	0.52818
ENSG00000177963.14	chr11	+	2	1.14992	0.290527	0.52818
ENSG00000133121.21	chr13	-	3	1.26138	0.2918	0.529674
ENSG00000175216.15	chr11	-	2	1.14329	0.291901	0.529674
ENSG00000181666.18	chr19	+	2	1.13579	0.293466	0.531977
ENSG00000124313.18	chrX	-	2	1.13455	0.293725	0.531977
ENSG00000151967.18	chr3	+	2	1.13052	0.294571	0.533006
ENSG00000100813.14	chr14	-	2	1.12888	0.294916	0.533129
ENSG00000155096.14	chr8	-	2	1.12419	0.295907	0.533709
ENSG00000043143.21	chr5	+	3	1.24652	0.295966	0.533709
ENSG00000047315.17	chr4	+	2	1.12341	0.296072	0.533709
ENSG00000123124.14	chr8	+	2	1.12129	0.296522	0.534019
ENSG00000112773.16	chr6	-	2	1.11934	0.296936	0.534261
ENSG00000109819.9	chr4	-	2	1.1177	0.297563	0.534888
ENSG00000110911.17	chr12	-	2	1.11403	0.298067	0.535293
ENSG00000143761.16	chr1	+	2	1.11072	0.298776	0.536064
ENSG00000153774.9	chr16	-	2	1.10925	0.299091	0.536089
ENSG00000167705.12	chr17	-	2	1.10805	0.299349	0.536089
ENSG00000121933.19	chr1	-	3	1.22397	0.302406	0.540627
ENSG00000197530.12	chr1	+	2	1.09192	0.302842	0.540627
ENSG00000132676.16	chr1	+	2	1.09089	0.303067	0.540627
ENSG00000133313.15	chr18	+	2	1.09054	0.303142	0.540627
ENSG00000135077.9	chr5	-	3	1.2209	0.303292	0.540627
ENSG00000108679.13	chr17	-	2	1.08546	0.304256	0.541713
ENSG00000178031.18	chr9	+	2	1.08344	0.3047	0.541713
ENSG00000128789.21	chr18	+	2	1.08322	0.304749	0.541713
ENSG00000135218.19	chr7	+	7	1.21193	0.305445	0.542447
ENSG00000066629.18	chr14	+	2	1.07699	0.306122	0.542587
ENSG00000262660.1	chr17	+	2	1.07681	0.306163	0.542587
ENSG00000277443.3	chr6	+	2	1.07587	0.306372	0.542587
ENSG00000145901.16	chr5	-	2	1.07414	0.306755	0.542765
ENSG00000049618.24	chr6	+	2	1.07006	0.307662	0.543868
ENSG00000170027.7	chr7	-	2	1.0601	0.309893	0.547307
ENSG00000286054.1	chr21	+	2	1.05617	0.310779	0.548367
ENSG00000152601.17	chr3	+	2	1.04912	0.312377	0.550678
ENSG00000159200.18	chr21	-	2	1.0458	0.313132	0.551011
ENSG00000189308.11	chr4	-	2	1.04577	0.31314	0.551011
ENSG00000187720.14	chr15	+	2	1.04213	0.313971	0.551587
ENSG00000138674.17	chr4	-	2	1.04182	0.314042	0.551587
ENSG00000163635.20	chr3	+	2	1.04027	0.314398	0.551707
ENSG00000136986.10	chr8	-	2	1.03566	0.315457	0.552964
ENSG00000241837.7	chr21	-	3	1.178	0.315989	0.552964
ENSG00000239523.6	chr3	+	2	1.03295	0.316083	0.552964
ENSG00000127914.19	chr7	+	2	1.03215	0.316268	0.552964
ENSG00000136160.17	chr13	-	2	1.02722	0.317411	0.554193
ENSG00000144524.18	chr2	+	2	1.02486	0.317959	0.554193
ENSG00000048540.15	chr12	-	2	1.02432	0.318086	0.554193
ENSG00000119403.15	chr9	-	2	1.02414	0.318126	0.554193
ENSG00000116754.13	chr1	+	2	1.02173	0.318691	0.554672
ENSG00000173264.15	chr11	+	2	1.01673	0.319861	0.5556
ENSG00000122644.13	chr7	+	2	1.01645	0.319926	0.5556
ENSG00000110693.18	chr11	-	2	1.01574	0.320093	0.5556
ENSG00000031003.10	chr5	-	2	1.00861	0.321775	0.558014
ENSG00000112183.15	chr6	+	2	1.00537	0.322544	0.558843
ENSG00000164953.16	chr8	+	2	1.00346	0.322998	0.559124
ENSG00000100284.22	chr22	+	2	1.00113	0.323553	0.55958
ENSG00000101608.13	chr18	+	2	0.994937	0.325033	0.561221
ENSG00000127946.17	chr7	-	2	0.992596	0.325596	0.561221
ENSG00000080546.13	chr6	-	2	0.992299	0.325667	0.561221
ENSG00000113758.13	chr5	-	2	0.992278	0.325672	0.561221
ENSG00000140382.15	chr15	+	2	0.990357	0.326135	0.561514
ENSG00000178607.17	chr17	-	2	0.989039	0.326453	0.561557
ENSG00000113594.10	chr5	-	2	0.985988	0.32719	0.562322
ENSG00000072195.15	chr2	+	4	1.16936	0.328034	0.56302
ENSG00000224397.7	chr20	+	2	0.980792	0.328451	0.56302
ENSG00000077782.21	chr8	-	2	0.980149	0.328608	0.56302
ENSG00000110811.20	chr12	+	2	0.9793	0.328815	0.56302
ENSG00000131143.10	chr16	+	3	1.13565	0.329064	0.56302
ENSG00000110492.16	chr11	+	2	0.976123	0.329591	0.563418
ENSG00000183963.19	chr22	+	2	0.96597	0.332086	0.565959
ENSG00000133142.18	chrX	+	2	0.965452	0.332214	0.565959
ENSG00000174197.16	chr15	+	2	0.965108	0.332299	0.565959
ENSG00000111716.14	chr12	-	3	1.12475	0.332518	0.565959
ENSG00000171700.14	chr20	-	2	0.963668	0.332656	0.565959
ENSG00000105321.14	chr19	+	2	0.962894	0.332847	0.565959
ENSG00000172037.14	chr3	-	2	0.959607	0.333663	0.566843
ENSG00000109654.16	chr4	+	2	0.954469	0.334944	0.5678
ENSG00000122367.20	chr10	+	2	0.954027	0.335055	0.5678
ENSG00000119917.15	chr10	+	2	0.953789	0.335115	0.5678
ENSG00000132640.15	chr20	+	2	0.950399	0.335964	0.568737
ENSG00000063244.13	chr19	+	2	0.946239	0.33701	0.570005
ENSG00000179348.12	chr3	-	2	0.94434	0.33749	0.570313
ENSG00000197580.13	chr11	+	2	0.942569	0.337938	0.570567
ENSG00000115159.16	chr2	+	2	0.934431	0.340006	0.573554
ENSG00000265107.3	chr1	-	2	0.929103	0.341369	0.575348
ENSG00000162734.13	chr1	+	2	0.927935	0.341669	0.575348
ENSG00000132475.10	chr17	-	3	1.09245	0.34298	0.577049
ENSG00000099260.11	chr1	+	2	0.920812	0.343506	0.577427
ENSG00000198034.11	chrX	-	2	0.918784	0.344032	0.577804
ENSG00000139644.13	chr12	+	2	0.916751	0.344559	0.578017
ENSG00000151474.23	chr10	-	2	0.915976	0.344761	0.578017
ENSG00000132471.12	chr17	-	2	0.913564	0.345389	0.578564
ENSG00000179988.15	chr10	+	2	0.912342	0.345708	0.578593
ENSG00000165868.16	chr10	-	2	0.910737	0.346128	0.578791
ENSG00000105701.16	chr19	-	3	1.08151	0.346601	0.579078
ENSG00000171681.12	chr12	+	2	0.907289	0.347031	0.579291
ENSG00000107959.17	chr10	-	2	0.905885	0.3474	0.579403
ENSG00000177548.13	chr16	-	2	0.904565	0.347747	0.579478
ENSG00000182979.18	chr14	+	3	1.07059	0.350252	0.583146
ENSG00000106018.14	chr7	-	2	0.89273	0.350883	0.583492
ENSG00000106348.18	chr7	-	2	0.891165	0.351301	0.583492
ENSG00000141552.18	chr17	+	2	0.890893	0.351373	0.583492
ENSG00000123636.18	chr2	-	2	0.885239	0.352888	0.585501
ENSG00000149091.15	chr11	+	4	1.10165	0.354692	0.587986
ENSG00000121281.13	chr16	+	3	1.05443	0.355732	0.5892
ENSG00000132507.18	chr17	+	2	0.869575	0.357133	0.590979
ENSG00000186184.19	chr13	+	2	0.868517	0.357422	0.590979
ENSG00000253320.7	chr8	+	2	0.865981	0.358117	0.591618
ENSG00000004059.11	chr7	+	2	0.860904	0.359514	0.593163
ENSG00000132646.11	chr20	-	2	0.860335	0.359671	0.593163
ENSG00000151247.13	chr4	-	2	0.857253	0.360523	0.593797
ENSG00000197461.13	chr7	-	2	0.856706	0.360674	0.593797
ENSG00000162772.17	chr1	+	3	1.03049	0.364015	0.598783
ENSG00000168556.7	chr4	+	2	0.843305	0.364416	0.598928
ENSG00000102786.15	chr13	-	2	0.83824	0.365844	0.600761
ENSG00000130158.14	chr19	-	2	0.834771	0.366826	0.601521
ENSG00000264247.2	chr18	-	2	0.834391	0.366934	0.601521
ENSG00000168016.15	chr3	-	2	0.83189	0.367646	0.602173
ENSG00000177098.9	chr11	-	2	0.829003	0.368469	0.602724
ENSG00000171492.14	chr1	+	2	0.828508	0.36861	0.602724
ENSG00000138303.18	chr10	-	3	1.01401	0.369834	0.603883
ENSG00000198517.10	chr7	+	2	0.823347	0.37009	0.603883
ENSG00000150636.17	chr18	+	2	0.822741	0.370264	0.603883
ENSG00000115902.11	chr2	+	2	0.819304	0.371254	0.604984
ENSG00000131697.18	chr1	-	2	0.812155	0.373327	0.607845
ENSG00000161958.11	chr17	+	3	1.00085	0.374547	0.609054
ENSG00000162458.13	chr1	+	2	0.807434	0.374705	0.609054
ENSG00000079308.19	chr2	-	9	1.08683	0.375788	0.610298
ENSG00000196526.10	chr4	-	2	0.797297	0.377688	0.612864
ENSG00000204922.5	chr11	+	2	0.793445	0.37883	0.614198
ENSG00000131759.18	chr17	+	3	0.986663	0.379701	0.614429
ENSG00000184347.15	chr5	-	2	0.789762	0.379927	0.614429
ENSG00000177606.8	chr1	-	2	0.788676	0.380251	0.614429
ENSG00000107738.20	chr10	-	2	0.788617	0.380269	0.614429
ENSG00000144331.20	chr2	-	3	0.98409	0.380643	0.614429
ENSG00000115657.14	chr2	-	2	0.786526	0.380895	0.614429
ENSG00000100234.12	chr22	+	2	0.78543	0.381223	0.614442
ENSG00000134897.14	chr13	+	2	0.779595	0.38298	0.616255
ENSG00000118137.10	chr11	-	2	0.778616	0.383275	0.616255
ENSG00000137497.18	chr11	-	4	1.03256	0.383902	0.616255
ENSG00000104904.12	chr19	+	2	0.775578	0.384196	0.616255
ENSG00000225377.6	chr20	-	2	0.774722	0.384455	0.616255
ENSG00000203739.4	chr1	-	2	0.774167	0.384624	0.616255
ENSG00000162616.9	chr1	+	2	0.773796	0.384737	0.616255
ENSG00000125844.16	chr20	-	2	0.771355	0.38548	0.616255
ENSG00000115602.17	chr2	+	2	0.770454	0.385755	0.616255
ENSG00000131149.19	chr16	+	2	0.770338	0.38579	0.616255
ENSG00000160209.19	chr21	+	3	0.969029	0.386208	0.616255
ENSG00000134294.14	chr12	-	2	0.767721	0.38659	0.616255
ENSG00000197565.16	chrX	-	2	0.767006	0.386809	0.616255
ENSG00000166313.19	chr11	-	2	0.766885	0.386846	0.616255
ENSG00000219607.4	chr6	+	2	0.764861	0.387467	0.616732
ENSG00000139842.15	chr13	+	2	0.762015	0.388342	0.617612
ENSG00000159403.18	chr12	-	2	0.76053	0.3888	0.617829
ENSG00000182022.18	chr10	-	2	0.754891	0.390547	0.62009
ENSG00000138757.15	chr4	-	2	0.753281	0.391047	0.620371
ENSG00000093072.18	chr22	-	2	0.746568	0.393145	0.622749
ENSG00000117528.14	chr1	+	2	0.746359	0.393211	0.622749
ENSG00000115677.17	chr2	-	5	1.03631	0.393613	0.622749
ENSG00000186073.14	chr15	+	2	0.744342	0.393845	0.622749
ENSG00000172889.16	chr9	+	3	0.942463	0.396232	0.625439
ENSG00000068745.15	chr3	-	3	0.941474	0.39661	0.625439
ENSG00000111642.16	chr12	-	3	0.941366	0.396652	0.625439
ENSG00000011454.18	chr9	+	2	0.734841	0.39685	0.625439
ENSG00000170142.12	chr3	+	2	0.730203	0.39833	0.627255
ENSG00000130811.12	chr19	-	2	0.72825	0.398955	0.627454
ENSG00000092841.19	chr12	+	2	0.727767	0.39911	0.627454
ENSG00000174891.13	chr3	+	2	0.723856	0.400368	0.628915
ENSG00000023171.18	chr11	+	3	0.929902	0.401065	0.629495
ENSG00000163347.6	chr3	-	2	0.72035	0.4015	0.629663
ENSG00000152894.15	chr6	-	2	0.718331	0.402154	0.630173
ENSG00000052126.15	chr12	+	2	0.706225	0.406111	0.635853
ENSG00000116922.14	chr1	-	2	0.700512	0.407998	0.638288
ENSG00000118596.12	chr12	+	2	0.698996	0.408501	0.638553
ENSG00000037241.7	chr5	+	2	0.697442	0.409018	0.63884
ENSG00000092964.18	chr8	+	2	0.69604	0.409485	0.63905
ENSG00000205189.12	chr8	+	2	0.693114	0.410462	0.640053
ENSG00000136521.13	chr3	+	2	0.691964	0.410847	0.640083
ENSG00000101639.18	chr18	+	2	0.690792	0.41124	0.640083
ENSG00000196136.18	chr14	+	2	0.69007	0.411482	0.640083
ENSG00000075391.17	chr1	+	2	0.687217	0.412441	0.640969
ENSG00000237125.11	chr4	+	3	0.899582	0.412985	0.640969
ENSG00000117399.14	chr1	+	2	0.6854	0.413054	0.640969
ENSG00000108691.9	chr17	+	2	0.684279	0.413433	0.641039
ENSG00000160753.16	chr1	+	2	0.680111	0.414847	0.641888
ENSG00000099797.15	chr19	+	2	0.677073	0.415881	0.641888
ENSG00000134982.17	chr5	+	2	0.67645	0.416094	0.641888
ENSG00000145431.11	chr4	-	2	0.675734	0.416338	0.641888
ENSG00000142230.13	chr19	+	3	0.891184	0.416351	0.641888
ENSG00000196652.12	chr7	+	2	0.675389	0.416456	0.641888
ENSG00000102781.14	chr13	-	2	0.675214	0.416516	0.641888
ENSG00000107897.20	chr10	-	2	0.674798	0.416658	0.641888
ENSG00000006194.10	chr16	+	2	0.671068	0.417938	0.643167
ENSG00000185129.8	chr5	+	2	0.670425	0.418159	0.643167
ENSG00000110429.14	chr11	-	2	0.66745	0.419184	0.644227
ENSG00000172009.15	chr19	+	2	0.658853	0.422169	0.648267
ENSG00000159267.16	chr21	-	2	0.657938	0.422489	0.648267
ENSG00000163872.16	chr3	+	2	0.652754	0.424306	0.650535
ENSG00000178209.16	chr8	-	7	1.00581	0.425242	0.651448
ENSG00000204634.13	chr2	-	2	0.647044	0.426322	0.652583
ENSG00000162819.12	chr1	+	2	0.644323	0.427288	0.65354
ENSG00000273899.5	chr22	+	2	0.642108	0.428077	0.654225
ENSG00000165810.17	chr5	+	3	0.859071	0.429488	0.655859
ENSG00000159592.11	chr1	-	3	0.857331	0.430213	0.656078
ENSG00000108306.13	chr17	-	2	0.635855	0.430316	0.656078
ENSG00000142937.12	chr1	+	2	0.632726	0.431443	0.657052
ENSG00000165458.14	chr11	+	2	0.631869	0.431753	0.657052
ENSG00000204438.11	chr6	-	2	0.630952	0.432084	0.657052
ENSG00000138413.14	chr2	-	2	0.630287	0.432325	0.657052
ENSG00000176209.12	chr8	+	2	0.624407	0.434462	0.65962
ENSG00000203709.12	chr1	-	2	0.623219	0.434896	0.65962
ENSG00000166398.14	chr19	+	2	0.622807	0.435047	0.65962
ENSG00000071082.11	chr2	+	2	0.619869	0.436123	0.660729
ENSG00000111639.8	chr12	-	2	0.616006	0.437544	0.662359
ENSG00000270647.6	chr17	+	2	0.611285	0.439291	0.66448
ENSG00000150995.20	chr3	+	2	0.609732	0.439868	0.664589
ENSG00000166278.15	chr6	+	2	0.609121	0.440096	0.664589
ENSG00000104881.16	chr19	-	2	0.608297	0.440403	0.664589
ENSG00000198668.13	chr14	+	2	0.606353	0.441128	0.664938
ENSG00000134758.14	chr18	+	2	0.605819	0.441328	0.664938
ENSG00000163072.16	chr2	+	2	0.600669	0.44326	0.665947
ENSG00000165806.21	chr10	+	2	0.600652	0.443266	0.665947
ENSG00000165795.23	chr14	-	3	0.826339	0.443323	0.665947
ENSG00000197702.14	chr11	+	3	0.824904	0.44394	0.665947
ENSG00000118900.15	chr16	+	2	0.598291	0.444157	0.665947
ENSG00000162434.13	chr1	-	2	0.597587	0.444423	0.665947
ENSG00000198160.15	chr1	+	2	0.597574	0.444428	0.665947
ENSG00000179222.18	chrX	+	2	0.59608	0.444993	0.666274
ENSG00000198722.14	chr9	+	2	0.594886	0.445446	0.666432
ENSG00000005882.12	chr17	+	2	0.592094	0.446507	0.667031
ENSG00000115459.18	chr2	+	2	0.592001	0.446542	0.667031
ENSG00000246695.8	chr12	-	2	0.586345	0.448705	0.668812
ENSG00000172530.20	chr16	+	2	0.58563	0.44898	0.668812
ENSG00000146540.15	chr7	-	3	0.811551	0.449724	0.668812
ENSG00000163964.18	chr3	+	2	0.58343	0.449826	0.668812
ENSG00000196440.11	chrX	+	2	0.582635	0.450133	0.668812
ENSG00000163399.16	chr1	+	2	0.582566	0.450159	0.668812
ENSG00000169499.15	chr8	+	2	0.582525	0.450175	0.668812
ENSG00000077522.14	chr1	+	3	0.80913	0.450781	0.669193
ENSG00000188549.12	chr15	-	2	0.57433	0.453355	0.672494
ENSG00000205220.12	chr16	-	2	0.572542	0.454054	0.67301
ENSG00000057294.15	chr12	-	2	0.568694	0.455563	0.674269
ENSG00000146083.12	chr5	-	2	0.568584	0.455606	0.674269
ENSG00000081277.13	chr1	+	2	0.566703	0.456347	0.674844
ENSG00000102024.18	chrX	+	2	0.561445	0.458428	0.676579
ENSG00000113140.11	chr5	-	2	0.560702	0.458723	0.676579
ENSG00000176978.14	chr9	-	2	0.559941	0.459026	0.676579
ENSG00000187498.16	chr13	-	2	0.559911	0.459038	0.676579
ENSG00000109171.15	chr4	+	2	0.559293	0.459284	0.676579
ENSG00000153094.24	chr2	+	2	0.558408	0.459637	0.676579
ENSG00000129084.18	chr11	-	2	0.557437	0.460024	0.676631
ENSG00000176728.10	chrY	-	2	0.554345	0.461262	0.677446
ENSG00000141540.11	chr17	+	2	0.55363	0.461549	0.677446
ENSG00000136925.15	chr9	-	2	0.553408	0.461638	0.677446
ENSG00000198755.11	chr6	+	2	0.551743	0.462308	0.67791
ENSG00000198624.13	chr5	-	2	0.550582	0.462776	0.678078
ENSG00000112992.18	chr5	+	2	0.544151	0.465381	0.681375
ENSG00000169764.16	chr2	+	3	0.774161	0.46634	0.682258
ENSG00000119333.12	chr9	-	2	0.539967	0.46709	0.682834
ENSG00000082641.16	chr17	+	3	0.771317	0.46763	0.682844
ENSG00000138964.17	chr22	+	2	0.538213	0.467809	0.682844
ENSG00000114473.14	chr3	-	3	0.769627	0.468398	0.683184
ENSG00000158856.18	chr8	+	4	0.855088	0.46883	0.683294
ENSG00000126267.11	chr19	+	2	0.53337	0.469804	0.684094
ENSG00000078246.17	chr12	+	2	0.531558	0.470554	0.684094
ENSG00000115685.15	chr2	+	2	0.531404	0.470618	0.684094
ENSG00000164830.19	chr8	+	3	0.76435	0.470805	0.684094
ENSG00000112893.10	chr5	+	2	0.525408	0.473114	0.686929
ENSG00000102531.16	chr13	+	3	0.756983	0.474186	0.687958
ENSG00000117625.14	chr1	+	2	0.522007	0.47454	0.687958
ENSG00000158169.13	chr9	-	2	0.517516	0.476433	0.690181
ENSG00000119139.21	chr9	+	3	0.750409	0.477226	0.690807
ENSG00000258315.5	chr17	+	2	0.514769	0.477598	0.690824
ENSG00000246273.8	chr11	+	2	0.511089	0.479165	0.692569
ENSG00000275915.1	chr1	+	2	0.508559	0.480248	0.693611
ENSG00000092068.20	chr14	-	2	0.503499	0.482425	0.696232
ENSG00000126461.15	chr19	+	2	0.501863	0.483133	0.696447
ENSG00000135185.12	chr7	-	2	0.500829	0.483581	0.696447
ENSG00000067208.14	chr1	-	2	0.500638	0.483664	0.696447
ENSG00000012232.9	chr8	+	2	0.496556	0.48544	0.698302
ENSG00000105810.10	chr7	-	2	0.496007	0.48568	0.698302
ENSG00000180879.14	chrX	+	2	0.493702	0.486689	0.699227
ENSG00000198420.10	chr7	-	2	0.492748	0.487107	0.699305
ENSG00000114544.17	chr3	-	2	0.491428	0.487687	0.699413
ENSG00000172819.17	chr12	-	3	0.727634	0.487912	0.699413
ENSG00000152689.18	chr2	+	3	0.726228	0.488579	0.699493
ENSG00000109501.14	chr4	+	2	0.489137	0.488697	0.699493
ENSG00000073711.11	chr3	+	2	0.485773	0.490185	0.7011
ENSG00000120885.22	chr8	-	2	0.482745	0.491532	0.702503
ENSG00000112541.18	chr6	-	4	0.8063	0.49479	0.706633
ENSG00000165671.21	chr5	+	2	0.473733	0.495578	0.707232
ENSG00000198042.11	chr8	+	2	0.471688	0.496504	0.708026
ENSG00000143420.19	chr1	-	2	0.469749	0.497385	0.708603
ENSG00000074266.22	chr11	+	2	0.469172	0.497647	0.708603
ENSG00000203880.12	chr20	+	2	0.466668	0.49879	0.709703
ENSG00000080189.15	chr20	-	2	0.463196	0.500381	0.710584
ENSG00000171680.23	chr1	-	2	0.463105	0.500423	0.710584
ENSG00000103994.18	chr15	-	3	0.701408	0.500525	0.710584
ENSG00000070961.16	chr12	-	2	0.461326	0.501242	0.710584
ENSG00000176170.14	chr17	+	2	0.460854	0.50146	0.710584
ENSG00000196605.7	chr19	-	2	0.460481	0.501632	0.710584
ENSG00000196576.16	chr22	-	2	0.459433	0.502116	0.710737
ENSG00000168395.16	chr2	+	2	0.457328	0.503091	0.710737
ENSG00000182732.18	chr14	+	2	0.456665	0.503399	0.710737
ENSG00000122986.14	chr12	-	2	0.456596	0.503431	0.710737
ENSG00000148219.18	chr9	-	2	0.455252	0.504056	0.710737
ENSG00000079999.14	chr19	-	2	0.454495	0.504409	0.710737
ENSG00000120833.14	chr12	+	4	0.788483	0.504559	0.710737
ENSG00000142156.15	chr21	+	2	0.45386	0.504705	0.710737
ENSG00000101224.18	chr20	+	2	0.451672	0.505727	0.711654
ENSG00000011465.18	chr12	-	5	0.835013	0.506821	0.71267
ENSG00000104205.16	chr8	+	2	0.446554	0.508133	0.713993
ENSG00000148120.17	chr9	+	3	0.68452	0.508826	0.714443
ENSG00000079805.18	chr19	+	2	0.44191	0.510334	0.716036
ENSG00000138735.16	chr4	-	2	0.439013	0.511716	0.717243
ENSG00000132938.22	chr13	+	2	0.438539	0.511942	0.717243
ENSG00000083857.14	chr4	-	2	0.433505	0.51436	0.719274
ENSG00000105993.15	chr7	+	2	0.433364	0.514428	0.719274
ENSG00000163947.12	chr3	-	3	0.673107	0.514517	0.719274
ENSG00000168575.10	chr8	-	2	0.431858	0.515156	0.719642
ENSG00000130528.12	chr19	-	2	0.427513	0.517265	0.722063
ENSG00000131386.19	chr3	+	2	0.424817	0.518581	0.723174
ENSG00000075420.13	chr3	+	2	0.42434	0.518815	0.723174
ENSG00000165119.21	chr9	-	2	0.419676	0.521109	0.725843
ENSG00000185787.15	chr15	+	2	0.41422	0.523814	0.72879
ENSG00000128951.14	chr15	+	2	0.413278	0.524284	0.72879
ENSG00000180155.20	chr8	-	2	0.413076	0.524385	0.72879
ENSG00000107262.26	chr9	-	2	0.412358	0.524744	0.72879
ENSG00000168646.13	chr17	-	2	0.409457	0.526198	0.72971
ENSG00000036448.10	chr8	+	3	0.649796	0.526347	0.72971
ENSG00000107669.18	chr10	-	2	0.408761	0.526547	0.72971
ENSG00000143632.14	chr1	-	2	0.407877	0.526992	0.729799
ENSG00000110446.12	chr11	-	2	0.401766	0.530087	0.732623
ENSG00000100599.16	chr14	+	2	0.401006	0.530475	0.732623
ENSG00000173641.18	chr1	-	2	0.400902	0.530527	0.732623
ENSG00000149557.14	chr11	-	4	0.742364	0.53056	0.732623
ENSG00000177885.15	chr17	-	2	0.398609	0.531699	0.733478
ENSG00000184702.20	chr22	+	3	0.638263	0.532304	0.733478
ENSG00000173960.14	chr2	+	2	0.39693	0.53256	0.733478
ENSG00000204138.13	chr1	+	2	0.396642	0.532708	0.733478
ENSG00000130176.8	chr19	+	3	0.635294	0.533848	0.73452
ENSG00000164850.15	chr7	+	2	0.389967	0.536158	0.736655
ENSG00000106333.13	chr7	+	3	0.630446	0.536381	0.736655
ENSG00000130779.22	chr12	-	2	0.389209	0.536552	0.736655
ENSG00000112837.17	chr6	-	2	0.387084	0.537661	0.737649
ENSG00000114861.23	chr3	-	5	0.784099	0.538756	0.738068
ENSG00000120278.16	chr6	+	2	0.384502	0.539013	0.738068
ENSG00000255248.9	chr11	-	3	0.62472	0.539388	0.738068
ENSG00000109756.9	chr4	+	5	0.782852	0.539554	0.738068
ENSG00000182899.17	chr3	+	2	0.382835	0.53989	0.738068
ENSG00000139687.16	chr13	+	2	0.380039	0.541366	0.739559
ENSG00000137962.13	chr1	-	2	0.378524	0.542169	0.739881
ENSG00000137496.18	chr11	+	2	0.378138	0.542374	0.739881
ENSG00000250159.7	chr5	-	2	0.375857	0.543588	0.740846
ENSG00000266094.8	chr1	+	2	0.375164	0.543958	0.740846
ENSG00000214063.11	chr11	+	2	0.374638	0.544239	0.740846
ENSG00000113657.13	chr5	-	2	0.372159	0.545567	0.742126
ENSG00000092929.12	chr17	-	2	0.370345	0.546544	0.742928
ENSG00000114439.19	chr3	+	2	0.369195	0.547164	0.743244
ENSG00000114391.13	chr3	-	2	0.367198	0.548244	0.744184
ENSG00000178802.18	chr15	+	3	0.605828	0.549435	0.745273
ENSG00000069667.16	chr15	-	2	0.361937	0.55111	0.746748
ENSG00000067064.12	chr10	-	2	0.361588	0.551301	0.746748
ENSG00000058262.10	chr3	+	2	0.359486	0.552455	0.747783
ENSG00000182154.8	chr9	+	2	0.357988	0.55328	0.748371
ENSG00000140859.16	chr16	-	2	0.356408	0.554152	0.749024
ENSG00000177354.12	chr10	+	2	0.354646	0.555129	0.749815
ENSG00000087074.8	chr19	+	2	0.352223	0.556477	0.750758
ENSG00000165192.14	chrX	-	2	0.35162	0.556814	0.750758
ENSG00000105193.9	chr19	-	2	0.350685	0.557336	0.750758
ENSG00000065427.15	chr16	-	2	0.349966	0.557739	0.750758
ENSG00000111913.20	chr6	-	2	0.349884	0.557784	0.750758
ENSG00000114854.8	chr3	-	2	0.348078	0.558798	0.751595
ENSG00000143995.20	chr2	+	2	0.346374	0.559758	0.752254
ENSG00000184009.13	chr17	-	2	0.345811	0.560075	0.752254
ENSG00000185236.12	chr19	+	2	0.345122	0.560464	0.752254
ENSG00000171385.10	chr1	-	2	0.343646	0.5613	0.752522
ENSG00000166974.13	chr18	+	2	0.343384	0.561449	0.752522
ENSG00000120729.10	chr5	+	2	0.341958	0.562666	0.753626
ENSG00000165269.13	chr9	-	2	0.34039	0.563152	0.753752
ENSG00000145743.17	chr5	-	2	0.333452	0.567139	0.758405
ENSG00000102575.13	chr19	-	2	0.332968	0.56742	0.758405
ENSG00000185215.11	chr14	+	2	0.330521	0.568841	0.759703
ENSG00000101871.16	chrX	-	2	0.329393	0.569498	0.759703
ENSG00000083720.13	chr5	-	2	0.329254	0.569579	0.759703
ENSG00000105707.15	chr19	+	2	0.325735	0.57164	0.761922
ENSG00000116774.12	chr1	+	2	0.323896	0.572723	0.762835
ENSG00000135447.17	chr12	-	2	0.322704	0.573427	0.763243
ENSG00000168488.18	chr16	+	2	0.320301	0.574852	0.763551
ENSG00000112936.19	chr5	+	4	0.667508	0.574951	0.763551
ENSG00000134369.15	chr1	+	2	0.319675	0.575224	0.763551
ENSG00000164116.17	chr4	+	2	0.319282	0.575458	0.763551
ENSG00000143774.17	chr1	+	3	0.557412	0.576079	0.763551
ENSG00000072682.20	chr5	-	2	0.317437	0.576559	0.763551
ENSG00000175182.15	chr3	+	2	0.317148	0.576732	0.763551
ENSG00000137936.18	chr1	-	2	0.316962	0.576843	0.763551
ENSG00000147408.14	chr8	-	3	0.553569	0.57825	0.764885
ENSG00000140718.21	chr16	+	2	0.308008	0.582253	0.769298
ENSG00000148985.20	chr11	+	3	0.546126	0.58248	0.769298
ENSG00000177169.10	chr12	+	2	0.307129	0.58279	0.769298
ENSG00000112137.18	chr6	+	3	0.538811	0.586669	0.773492
ENSG00000147130.14	chrX	-	2	0.300322	0.58698	0.773492
ENSG00000136068.15	chr3	+	2	0.300005	0.587177	0.773492
ENSG00000186716.21	chr22	+	2	0.298281	0.588248	0.774372
ENSG00000134884.15	chr13	-	2	0.296236	0.589525	0.775424
ENSG00000049323.16	chr2	+	2	0.295707	0.589856	0.775424
ENSG00000124440.16	chr19	+	3	0.532389	0.590372	0.775571
ENSG00000108387.15	chr17	-	3	0.531423	0.590931	0.775774
ENSG00000160111.14	chr19	-	2	0.292521	0.591859	0.776461
ENSG00000222041.11	chr2	+	2	0.291203	0.592692	0.777022
ENSG00000198482.14	chr19	+	2	0.2905	0.593137	0.777041
ENSG00000134371.14	chr1	+	2	0.2899	0.593517	0.777041
ENSG00000170175.11	chr17	+	3	0.522686	0.596013	0.779777
ENSG00000250644.3	chr11	-	2	0.284832	0.596751	0.78021
ENSG00000132635.17	chr20	-	2	0.283218	0.597789	0.781035
ENSG00000101191.17	chr20	-	2	0.281783	0.598715	0.781712
ENSG00000272391.6	chr7	-	2	0.280482	0.599557	0.782052
ENSG00000153187.20	chr1	-	4	0.625408	0.601084	0.782052
ENSG00000106246.18	chr7	-	2	0.277798	0.601302	0.782052
ENSG00000152413.15	chr5	-	2	0.277512	0.601489	0.782052
ENSG00000092820.18	chr6	-	2	0.276924	0.601873	0.782052
ENSG00000188257.12	chr1	-	2	0.276792	0.602043	0.782052
ENSG00000167081.18	chr9	+	2	0.276581	0.602096	0.782052
ENSG00000010282.15	chr3	-	2	0.276366	0.602237	0.782052
ENSG00000128563.13	chr7	+	2	0.275155	0.603031	0.782233
ENSG00000114923.17	chr2	+	4	0.622068	0.603192	0.782233
ENSG00000182534.13	chr17	-	3	0.504403	0.606795	0.785007
ENSG00000226742.4	chr18	+	2	0.269399	0.606834	0.785007
ENSG00000136261.15	chr7	+	2	0.268959	0.607126	0.785007
ENSG00000104870.13	chr19	+	2	0.267041	0.608406	0.785007
ENSG00000173928.4	chr19	+	2	0.265987	0.609112	0.785007
ENSG00000184220.12	chr3	+	2	0.265705	0.609302	0.785007
ENSG00000147862.17	chr9	-	2	0.265402	0.609505	0.785007
ENSG00000166484.20	chr17	+	2	0.264727	0.609958	0.785007
ENSG00000123358.20	chr12	+	3	0.499179	0.609994	0.785007
ENSG00000183044.12	chr16	+	2	0.26348	0.610798	0.785007
ENSG00000141068.14	chr17	+	2	0.263463	0.61081	0.785007
ENSG00000154309.9	chr1	+	2	0.263351	0.610885	0.785007
ENSG00000137075.18	chr9	-	3	0.497323	0.611024	0.785007
ENSG00000176155.19	chr17	-	2	0.262983	0.611134	0.785007
ENSG00000144118.14	chr2	+	2	0.262485	0.61147	0.785007
ENSG00000237773.7	chr7	-	2	0.261288	0.612281	0.785452
ENSG00000014216.16	chr11	+	2	0.260052	0.61312	0.785452
ENSG00000197321.15	chr10	-	3	0.493297	0.613443	0.785452
ENSG00000163412.13	chr3	-	2	0.259561	0.613455	0.785452
ENSG00000189171.14	chr1	-	2	0.258834	0.61395	0.785561
ENSG00000091428.18	chr2	+	2	0.25538	0.616317	0.787574
ENSG00000166140.17	chr15	+	2	0.255339	0.616345	0.787574
ENSG00000139579.13	chr12	+	2	0.254629	0.616834	0.787675
ENSG00000131981.16	chr14	+	3	0.486016	0.617843	0.787949
ENSG00000054148.18	chr9	+	2	0.253129	0.61787	0.787949
ENSG00000163156.12	chr1	+	2	0.249454	0.620424	0.79068
ENSG00000120899.18	chr8	+	2	0.244936	0.623597	0.794196
ENSG00000105647.19	chr19	+	3	0.473535	0.62546	0.796041
ENSG00000134954.14	chr11	-	2	0.239629	0.627371	0.797857
ENSG00000163539.17	chr3	-	3	0.469668	0.62784	0.797857
ENSG00000168542.16	chr2	+	2	0.238562	0.628136	0.797857
ENSG00000048740.18	chr10	+	3	0.467908	0.628927	0.798057
ENSG00000173113.7	chr11	-	2	0.236232	0.629814	0.798057
ENSG00000166272.18	chr10	+	2	0.236121	0.629894	0.798057
ENSG00000153815.17	chr16	+	2	0.236034	0.629957	0.798057
ENSG00000164733.22	chr8	-	3	0.465029	0.630708	0.798481
ENSG00000277791.5	chr17	+	2	0.233684	0.631661	0.79916
ENSG00000163520.14	chr3	+	2	0.231825	0.633016	0.800346
ENSG00000093167.18	chr3	-	2	0.230614	0.633903	0.800657
ENSG00000079459.13	chr8	+	2	0.230349	0.634097	0.800657
ENSG00000101040.19	chr20	-	2	0.228359	0.635561	0.801712
ENSG00000090924.15	chr19	+	2	0.227934	0.635875	0.801712
ENSG00000183023.18	chr2	-	3	0.456227	0.636187	0.801712
ENSG00000154305.18	chr1	+	2	0.226155	0.637192	0.802452
ENSG00000179051.14	chr1	-	2	0.225496	0.637682	0.802541
ENSG00000175920.18	chr4	+	2	0.224466	0.638448	0.802608
ENSG00000169554.22	chr2	-	3	0.45242	0.638571	0.802608
ENSG00000117707.16	chr1	+	3	0.450236	0.639943	0.803805
ENSG00000066697.15	chr9	+	2	0.220773	0.641216	0.804708
ENSG00000122390.19	chr16	+	2	0.219912	0.641865	0.804708
ENSG00000255399.4	chr12	+	2	0.219195	0.642407	0.804708
ENSG00000102125.16	chrX	+	2	0.219023	0.642537	0.804708
ENSG00000149823.9	chr11	+	2	0.218729	0.642759	0.804708
ENSG00000161513.12	chr17	-	2	0.217994	0.643317	0.804845
ENSG00000182963.11	chr17	-	2	0.217103	0.643994	0.804845
ENSG00000138085.17	chr2	+	2	0.216928	0.644127	0.804845
ENSG00000162595.7	chr1	-	2	0.215589	0.645149	0.80515
ENSG00000106211.10	chr7	+	2	0.215507	0.645211	0.80515
ENSG00000080824.19	chr14	-	4	0.552064	0.648522	0.80847
ENSG00000065978.19	chr1	+	2	0.210833	0.648808	0.80847
ENSG00000132334.17	chr10	+	3	0.435176	0.64949	0.80847
ENSG00000140939.14	chr16	+	2	0.209529	0.64982	0.80847
ENSG00000178188.14	chr16	+	2	0.209325	0.649979	0.80847
ENSG00000211448.13	chr14	-	2	0.208442	0.650667	0.8088
ENSG00000130054.5	chrX	+	2	0.207556	0.651359	0.809136
ENSG00000004478.8	chr12	+	2	0.204283	0.653931	0.810889
ENSG00000068024.17	chr2	-	3	0.428023	0.654076	0.810889
ENSG00000122643.22	chr7	-	2	0.203996	0.654157	0.810889
ENSG00000067141.17	chr15	+	2	0.202994	0.654951	0.810889
ENSG00000122417.15	chr1	-	2	0.202657	0.655218	0.810889
ENSG00000149273.15	chr11	+	2	0.202072	0.655682	0.810889
ENSG00000152061.23	chr1	+	3	0.424883	0.656099	0.810889
ENSG00000153048.11	chr16	-	2	0.20099	0.656544	0.810889
ENSG00000168003.18	chr11	+	2	0.200066	0.657282	0.810889
ENSG00000278311.5	chr17	+	2	0.198498	0.658539	0.810889
ENSG00000175505.11	chr11	-	2	0.197932	0.658993	0.810889
ENSG00000105699.17	chr19	+	2	0.197914	0.659008	0.810889
ENSG00000230590.11	chrX	-	2	0.197766	0.659127	0.810889
ENSG00000267082.1	chr19	+	2	0.197719	0.659165	0.810889
ENSG00000113448.19	chr5	-	2	0.197679	0.659197	0.810889
ENSG00000102265.12	chrX	+	3	0.419577	0.659534	0.810889
ENSG00000140632.17	chr16	-	3	0.4181	0.660494	0.810978
ENSG00000073417.15	chr15	+	2	0.195686	0.660807	0.810978
ENSG00000050405.13	chr12	-	2	0.195271	0.661144	0.810978
ENSG00000134201.12	chr1	+	2	0.194468	0.661796	0.810978
ENSG00000130695.16	chr1	+	2	0.193988	0.662187	0.810978
ENSG00000088899.15	chr20	-	2	0.193706	0.662416	0.810978
ENSG00000143740.15	chr1	+	3	0.414915	0.662567	0.810978
ENSG00000106034.18	chr7	+	2	0.192383	0.663498	0.811265
ENSG00000168824.14	chr4	+	2	0.1922	0.663647	0.811265
ENSG00000170365.10	chr4	+	2	0.191106	0.664545	0.811714
ENSG00000173372.17	chr1	+	2	0.190722	0.664861	0.811714
ENSG00000055609.20	chr7	-	2	0.190022	0.665437	0.811901
ENSG00000143198.13	chr1	+	3	0.408618	0.666687	0.812594
ENSG00000138411.13	chr2	-	2	0.188311	0.666852	0.812594
ENSG00000196923.14	chr5	-	2	0.187036	0.667911	0.813319
ENSG00000188312.14	chr9	+	2	0.186201	0.668608	0.813319
ENSG00000147255.19	chrX	-	2	0.185809	0.668935	0.813319
ENSG00000163110.15	chr4	+	3	0.404858	0.66916	0.813319
ENSG00000125733.18	chr19	+	2	0.185053	0.669568	0.813319
ENSG00000235109.7	chr6	-	2	0.184495	0.670035	0.813372
ENSG00000171408.14	chr6	+	2	0.183809	0.670612	0.813527
ENSG00000247271.7	chr11	+	2	0.183335	0.671011	0.813527
ENSG00000115649.16	chr2	-	2	0.182823	0.671442	0.813535
ENSG00000109971.14	chr11	-	3	0.398382	0.673441	0.815441
ENSG00000182903.16	chr4	-	2	0.17774	0.675768	0.817126
ENSG00000198715.13	chr1	-	2	0.177722	0.675783	0.817126
ENSG00000032444.17	chr19	+	2	0.177342	0.67611	0.817126
ENSG00000155755.19	chr2	-	2	0.174888	0.678227	0.819169
ENSG00000101557.15	chr18	+	2	0.173601	0.679344	0.820001
ENSG00000196507.11	chrX	+	2	0.171436	0.681235	0.821163
ENSG00000048707.15	chr1	+	2	0.171147	0.681488	0.821163
ENSG00000154978.13	chr7	-	2	0.170845	0.681753	0.821163
ENSG00000104976.12	chr19	+	2	0.170543	0.682019	0.821163
ENSG00000188938.17	chr9	-	3	0.384301	0.682847	0.821644
ENSG00000126001.16	chr20	+	2	0.168159	0.684124	0.822249
ENSG00000124535.16	chr6	+	2	0.168012	0.684254	0.822249
ENSG00000166913.13	chr20	+	2	0.167582	0.684636	0.822249
ENSG00000262879.6	chr17	-	2	0.166473	0.685623	0.822919
ENSG00000075651.16	chr3	-	2	0.164334	0.687537	0.824701
ENSG00000158158.12	chr2	+	2	0.1635	0.688288	0.82483
ENSG00000121316.11	chr12	-	2	0.16326	0.688505	0.82483
ENSG00000158864.13	chr1	+	2	0.162522	0.689171	0.825047
ENSG00000198832.10	chr22	-	2	0.161836	0.689792	0.825047
ENSG00000198853.12	chr9	+	2	0.161632	0.689977	0.825047
ENSG00000143337.19	chr1	+	2	0.159466	0.69195	0.826891
ENSG00000103043.15	chr16	-	2	0.158291	0.693027	0.827543
ENSG00000172757.13	chr11	-	2	0.157552	0.693706	0.827543
ENSG00000154153.14	chr5	-	2	0.157461	0.69379	0.827543
ENSG00000166963.13	chr15	+	2	0.1568	0.6944	0.82768
ENSG00000062582.14	chr7	-	2	0.156402	0.694768	0.82768
ENSG00000104853.16	chr19	+	2	0.154322	0.696698	0.829369
ENSG00000182667.14	chr11	+	2	0.153945	0.69705	0.829369
ENSG00000132002.9	chr19	-	2	0.153445	0.697517	0.82941
ENSG00000010803.16	chr1	-	2	0.152025	0.698849	0.830478
ENSG00000136205.17	chr7	-	3	0.359519	0.699736	0.830664
ENSG00000079435.10	chr19	-	2	0.15068	0.700117	0.830664
ENSG00000068971.14	chr11	+	2	0.15014	0.700627	0.830664
ENSG00000137070.18	chr9	+	2	0.149597	0.701142	0.830664
ENSG00000158435.8	chr2	+	2	0.149188	0.70153	0.830664
ENSG00000144596.13	chr3	-	2	0.149111	0.701604	0.830664
ENSG00000173638.19	chr21	-	2	0.147486	0.703153	0.831985
ENSG00000182175.14	chr15	-	2	0.146318	0.704273	0.832796
ENSG00000228474.6	chr2	-	2	0.144967	0.705575	0.832933
ENSG00000151503.13	chr11	-	2	0.144593	0.705937	0.832933
ENSG00000169398.19	chr8	-	2	0.144368	0.706154	0.832933
ENSG00000128595.17	chr7	+	2	0.144282	0.706238	0.832933
ENSG00000224861.1	chr14	-	2	0.143762	0.706742	0.832933
ENSG00000130558.20	chr9	+	2	0.143161	0.707326	0.832933
ENSG00000171914.16	chr15	+	2	0.143055	0.707429	0.832933
ENSG00000140403.12	chr15	+	2	0.142353	0.708114	0.833016
ENSG00000144476.6	chr2	+	2	0.141672	0.708779	0.833016
ENSG00000145990.11	chr6	-	2	0.140672	0.709761	0.833016
ENSG00000158793.14	chr1	+	2	0.140328	0.710098	0.833016
ENSG00000170871.12	chr4	+	2	0.140208	0.710217	0.833016
ENSG00000122378.14	chr10	+	2	0.140078	0.710345	0.833016
ENSG00000108669.16	chr17	-	3	0.343787	0.710682	0.833016
ENSG00000140199.13	chr15	-	2	0.139187	0.711224	0.833016
ENSG00000274750.2	chr6	+	2	0.139001	0.711408	0.833016
ENSG00000184182.19	chr2	+	2	0.136639	0.713758	0.835257
ENSG00000188730.5	chr7	+	2	0.132151	0.718286	0.840044
ENSG00000145391.14	chr4	-	2	0.128559	0.721974	0.843843
ENSG00000119707.14	chr14	+	2	0.127325	0.723254	0.844824
ENSG00000153310.19	chr8	-	2	0.12507	0.725612	0.847062
ENSG00000156011.17	chr8	-	3	0.321141	0.726752	0.847308
ENSG00000140650.12	chr16	+	2	0.123687	0.727069	0.847308
ENSG00000179094.16	chr17	-	2	0.123613	0.727148	0.847308
ENSG00000158747.15	chr1	+	2	0.12279	0.72802	0.847329
ENSG00000170776.22	chr15	+	4	0.435859	0.728049	0.847329
ENSG00000130822.16	chrX	-	2	0.120394	0.730578	0.848802
ENSG00000251562.8	chr11	+	2	0.120026	0.730973	0.848802
ENSG00000093144.19	chr6	-	2	0.119951	0.731054	0.848802
ENSG00000136167.15	chr13	-	2	0.119922	0.731085	0.848802
ENSG00000084090.14	chr2	-	2	0.119486	0.731555	0.848834
ENSG00000121964.14	chr2	-	2	0.116823	0.734445	0.851672
ENSG00000136100.14	chr13	-	2	0.115798	0.735566	0.852033
ENSG00000092098.17	chr14	+	2	0.115727	0.735645	0.852033
ENSG00000113645.15	chr5	+	2	0.115041	0.736398	0.852391
ENSG00000175550.8	chr11	+	2	0.113723	0.737855	0.853074
ENSG00000132170.23	chr3	+	2	0.113702	0.737878	0.853074
ENSG00000100196.11	chr22	+	2	0.111967	0.73981	0.854356
ENSG00000125730.17	chr19	-	2	0.111906	0.739878	0.854356
ENSG00000116667.15	chr1	+	2	0.111452	0.740386	0.854429
ENSG00000099622.14	chr19	+	3	0.300726	0.741562	0.855033
ENSG00000163605.15	chr3	+	3	0.300399	0.741801	0.855033
ENSG00000145819.18	chr5	+	2	0.107408	0.744966	0.857826
ENSG00000170421.12	chr12	-	2	0.107114	0.745303	0.857826
ENSG00000158092.7	chr3	+	2	0.106885	0.745566	0.857826
ENSG00000196914.9	chr11	+	2	0.105008	0.74773	0.8598
ENSG00000158417.11	chr2	+	2	0.10422	0.748645	0.860336
ENSG00000084234.18	chr11	+	3	0.290042	0.749437	0.860478
ENSG00000128585.18	chr7	+	2	0.103345	0.749665	0.860478
ENSG00000196352.16	chr1	+	2	0.102608	0.750529	0.860953
ENSG00000106565.18	chr7	-	2	0.101193	0.752196	0.862166
ENSG00000156958.15	chr15	+	2	0.10061	0.752886	0.862166
ENSG00000150401.15	chr13	-	2	0.099988	0.753625	0.862166
ENSG00000115461.5	chr2	-	2	0.0995121	0.754193	0.862166
ENSG00000112759.19	chr6	+	4	0.397828	0.754987	0.862166
ENSG00000150991.15	chr12	-	2	0.0982354	0.755722	0.862166
ENSG00000204590.12	chr6	-	2	0.0982125	0.75575	0.862166
ENSG00000115310.18	chr2	-	3	0.281193	0.756025	0.862166
ENSG00000143353.12	chr1	+	2	0.0979093	0.756114	0.862166
ENSG00000112576.13	chr6	-	2	0.0976716	0.756401	0.862166
ENSG00000187778.14	chr12	-	2	0.0973028	0.756846	0.862166
ENSG00000138772.13	chr4	+	2	0.0971827	0.756991	0.862166
ENSG00000139146.14	chr12	-	2	0.0968208	0.757429	0.862166
ENSG00000133678.14	chr10	+	2	0.0942013	0.760627	0.865157
ENSG00000023191.17	chr11	-	3	0.274618	0.760959	0.865157
ENSG00000156709.15	chrX	-	3	0.27191	0.763002	0.866558
ENSG00000122359.18	chr10	-	2	0.0921429	0.763175	0.866558
ENSG00000127022.16	chr5	+	2	0.0913122	0.764212	0.866558
ENSG00000100243.21	chr22	-	2	0.0908934	0.764737	0.866558
ENSG00000171604.12	chr5	+	2	0.0908415	0.764802	0.866558
ENSG00000156113.24	chr10	-	2	0.0904614	0.765279	0.866558
ENSG00000076944.16	chr19	+	2	0.0904016	0.765354	0.866558
ENSG00000079102.16	chr8	-	2	0.0896921	0.766249	0.867059
ENSG00000171714.12	chr11	+	2	0.0879679	0.768439	0.869025
ENSG00000113312.11	chr5	+	2	0.0870447	0.769622	0.869349
ENSG00000148053.17	chr9	+	2	0.0870364	0.769632	0.869349
ENSG00000228300.14	chr19	+	2	0.0862825	0.770603	0.869874
ENSG00000104490.18	chr8	-	2	0.0859719	0.771004	0.869874
ENSG00000167740.10	chr17	+	2	0.0855395	0.771564	0.869973
ENSG00000136603.14	chr3	+	2	0.0848909	0.772407	0.869973
ENSG00000183098.11	chr13	+	2	0.0848561	0.772452	0.869973
ENSG00000176490.5	chr19	-	2	0.0838718	0.773738	0.870909
ENSG00000102967.12	chr16	+	2	0.0832556	0.774547	0.871309
ENSG00000135241.17	chr7	-	2	0.0826867	0.775297	0.871641
ENSG00000149115.14	chr11	-	3	0.254054	0.776609	0.872499
ENSG00000082293.13	chr6	+	2	0.0814254	0.77697	0.872499
ENSG00000141736.14	chr17	+	2	0.080927	0.777635	0.872612
ENSG00000104967.8	chr19	-	2	0.0806686	0.777981	0.872612
ENSG00000124749.17	chr6	-	2	0.0801394	0.77869	0.872827
ENSG00000110077.14	chr11	-	2	0.0796089	0.779404	0.872827
ENSG00000012171.20	chr3	+	2	0.0795098	0.779538	0.872827
ENSG00000104805.16	chr19	+	3	0.241293	0.786488	0.879819
ENSG00000151835.16	chr13	-	2	0.0742972	0.786699	0.879819
ENSG00000196419.13	chr22	+	2	0.0730163	0.7885	0.881318
ENSG00000170348.9	chr14	-	2	0.0722401	0.789599	0.882034
ENSG00000099341.12	chr19	+	2	0.0717515	0.790295	0.882296
ENSG00000118689.15	chr6	+	2	0.0702254	0.792483	0.884225
ENSG00000204520.14	chr6	+	2	0.0690956	0.79412	0.884793
ENSG00000187288.12	chr3	-	2	0.0690683	0.79416	0.884793
ENSG00000198695.2	chrM	-	2	0.0689194	0.794376	0.884793
ENSG00000142676.14	chr1	+	2	0.068119	0.795546	0.88519
ENSG00000106823.12	chr9	-	2	0.0680443	0.795656	0.88519
ENSG00000187079.20	chr11	+	2	0.0675686	0.796355	0.885454
ENSG00000046653.15	chrX	-	2	0.0666843	0.797662	0.886169
ENSG00000136710.10	chr2	-	2	0.0663642	0.798137	0.886169
ENSG00000167543.16	chr17	+	3	0.226145	0.798384	0.886169
ENSG00000134504.14	chr18	-	2	0.064798	0.80048	0.887982
ENSG00000101972.19	chrX	+	2	0.0631582	0.802966	0.889207
ENSG00000269313.5	chrX	+	2	0.063053	0.803127	0.889207
ENSG00000259498.1	chr15	-	2	0.0630521	0.803128	0.889207
ENSG00000223969.6	chr7	-	2	0.0628491	0.803439	0.889207
ENSG00000173120.15	chr11	+	2	0.061909	0.804883	0.890292
ENSG00000132669.14	chr20	+	4	0.326925	0.805879	0.890461
ENSG00000041880.15	chr3	+	2	0.0612102	0.805964	0.890461
ENSG00000203485.14	chr14	+	2	0.0607622	0.806661	0.8905
ENSG00000242282.6	chr2	-	2	0.0605908	0.806928	0.8905
ENSG00000101413.12	chr20	+	3	0.21349	0.808466	0.891683
ENSG00000181513.15	chr17	+	2	0.0592333	0.809059	0.891773
ENSG00000143947.15	chr2	+	2	0.0589693	0.809477	0.891773
ENSG00000173486.14	chr11	+	2	0.058579	0.810096	0.891943
ENSG00000197694.18	chr9	+	2	0.0576391	0.811596	0.893081
ENSG00000150764.14	chr11	+	3	0.206736	0.8139	0.895104
ENSG00000127863.16	chr13	+	2	0.0549383	0.815978	0.896875
ENSG00000167685.15	chr19	+	2	0.0542048	0.817188	0.897571
ENSG00000274104.1	chr19	-	2	0.0539875	0.817548	0.897571
ENSG00000179818.14	chr2	-	2	0.0536165	0.818165	0.897734
ENSG00000175449.14	chr5	+	2	0.053313	0.818671	0.897776
ENSG00000105697.9	chr19	+	2	0.0529043	0.8195	0.897995
ENSG00000168237.18	chr3	+	2	0.052635	0.819807	0.897995
ENSG00000215386.13	chr21	+	3	0.19784	0.821117	0.898917
ENSG00000143554.14	chr1	+	2	0.0511683	0.822291	0.899203
ENSG00000106052.13	chr7	+	2	0.0511537	0.822316	0.899203
ENSG00000124831.19	chr2	+	3	0.192762	0.825266	0.901202
ENSG00000111678.11	chr12	+	2	0.0491302	0.825806	0.901202
ENSG00000126970.16	chrX	-	2	0.0485866	0.826756	0.901202
ENSG00000150527.17	chr14	+	2	0.0484748	0.826952	0.901202
ENSG00000170638.10	chr22	+	2	0.048275	0.827303	0.901202
ENSG00000153113.24	chr5	+	5	0.372252	0.82779	0.901202
ENSG00000118473.22	chr1	+	2	0.0479414	0.827891	0.901202
ENSG00000138594.14	chr15	+	2	0.0479346	0.827903	0.901202
ENSG00000108219.15	chr10	+	2	0.0476051	0.828486	0.901325
ENSG00000164849.10	chr7	+	2	0.0472938	0.829039	0.901415
ENSG00000153904.21	chr1	-	2	0.0468589	0.829814	0.901747
ENSG00000186352.9	chr4	+	2	0.045746	0.831815	0.90251
ENSG00000113441.16	chr5	+	2	0.0456775	0.831939	0.90251
ENSG00000080503.24	chr9	+	4	0.290393	0.832184	0.90251
ENSG00000173281.5	chr8	-	2	0.0452687	0.832681	0.90251
ENSG00000148339.12	chr9	+	2	0.0451656	0.832869	0.90251
ENSG00000182871.16	chr21	+	2	0.0445342	0.834024	0.902845
ENSG00000132906.18	chr1	-	2	0.0444821	0.834119	0.902845
ENSG00000152082.15	chr2	+	2	0.0441253	0.834776	0.903046
ENSG00000153487.13	chr13	+	2	0.0429276	0.837	0.904942
ENSG00000265972.6	chr1	-	2	0.0425206	0.837764	0.905257
ENSG00000068028.17	chr3	-	2	0.0412006	0.840266	0.90745
ENSG00000150630.4	chr4	-	2	0.0403236	0.841952	0.907727
ENSG00000059145.19	chr16	-	2	0.0398981	0.842776	0.907727
ENSG00000137486.17	chr11	-	2	0.0398038	0.84296	0.907727
ENSG00000100897.18	chr14	+	2	0.0397644	0.843036	0.907727
ENSG00000134333.14	chr11	+	2	0.039694	0.843174	0.907727
ENSG00000176046.9	chr16	-	2	0.0395973	0.843362	0.907727
ENSG00000172159.16	chr9	-	2	0.0391614	0.844215	0.908135
ENSG00000184060.11	chr17	+	2	0.0386241	0.845273	0.908494
ENSG00000183255.12	chr21	-	2	0.0385112	0.845497	0.908494
ENSG00000170473.17	chr12	-	2	0.0381343	0.846245	0.908789
ENSG00000110665.12	chr11	-	2	0.0372523	0.84801	0.909814
ENSG00000010256.11	chr3	-	2	0.0371843	0.848147	0.909814
ENSG00000080709.16	chr5	+	2	0.0366314	0.849266	0.910505
ENSG00000120549.18	chr10	+	2	0.0363605	0.849818	0.910587
ENSG00000198796.7	chr18	-	2	0.0353045	0.851988	0.912403
ENSG00000236714.3	chr5	+	2	0.0337288	0.85529	0.915428
ENSG00000143549.21	chr1	-	3	0.154924	0.856874	0.916612
ENSG00000134590.14	chrX	+	2	0.0320727	0.858848	0.918211
ENSG00000196531.14	chr12	-	3	0.149845	0.861212	0.919917
ENSG00000135250.17	chr7	-	3	0.149622	0.861403	0.919917
ENSG00000125398.8	chr17	+	2	0.0293048	0.865012	0.923257
ENSG00000239305.7	chr2	-	2	0.0288581	0.866035	0.923835
ENSG00000131788.16	chr1	-	2	0.0284129	0.867062	0.924416
ENSG00000173598.14	chr12	+	2	0.0279675	0.868098	0.925007
ENSG00000164318.18	chr5	+	2	0.0275639	0.869044	0.925501
ENSG00000120742.11	chr3	-	2	0.027085	0.870176	0.926192
ENSG00000245532.9	chr11	+	2	0.0247223	0.875918	0.931328
ENSG00000178860.9	chr8	-	2	0.0247004	0.875972	0.931328
ENSG00000149269.10	chr11	-	2	0.0242273	0.877156	0.932069
ENSG00000005238.20	chr9	-	2	0.0238636	0.878074	0.932528
ENSG00000157873.18	chr1	+	2	0.0236555	0.878603	0.932573
ENSG00000116044.16	chr2	-	2	0.022607	0.881302	0.934921
ENSG00000005022.6	chrX	+	2	0.0219699	0.882974	0.935804
ENSG00000168405.17	chr6	-	3	0.124604	0.88311	0.935804
ENSG00000012223.13	chr3	-	2	0.0215614	0.884059	0.936292
ENSG00000179833.4	chr2	-	2	0.021069	0.885381	0.937175
ENSG00000131196.18	chr18	+	2	0.0206827	0.886429	0.937353
ENSG00000177311.11	chr3	+	2	0.0205106	0.886899	0.937353
ENSG00000242259.9	chr22	-	2	0.0204682	0.887015	0.937353
ENSG00000175334.8	chr11	+	2	0.0200012	0.888303	0.938196
ENSG00000042753.12	chr19	-	2	0.0190939	0.890849	0.939592
ENSG00000105855.10	chr7	+	2	0.0190773	0.890896	0.939592
ENSG00000176834.14	chr12	-	2	0.0188455	0.891556	0.939592
ENSG00000116584.20	chr1	-	2	0.0187664	0.891783	0.939592
ENSG00000071127.17	chr4	-	3	0.113672	0.892772	0.939592
ENSG00000178149.17	chr3	-	2	0.0183501	0.892982	0.939592
ENSG00000175538.11	chr11	-	2	0.0182551	0.893258	0.939592
ENSG00000075292.19	chr2	+	2	0.018157	0.893543	0.939592
ENSG00000167703.15	chr17	-	2	0.0179243	0.894223	0.939792
ENSG00000108312.15	chr17	-	2	0.0170841	0.896717	0.941874
ENSG00000115904.14	chr2	-	2	0.0169285	0.897186	0.941874
ENSG00000240849.11	chr20	-	2	0.0163913	0.898821	0.943074
ENSG00000182796.14	chr12	+	2	0.0157874	0.900693	0.944521
ENSG00000134138.20	chr15	-	4	0.189848	0.90296	0.945726
ENSG00000174405.14	chr13	-	2	0.0149287	0.903417	0.945726
ENSG00000072609.18	chr12	-	2	0.0149271	0.903422	0.945726
ENSG00000115963.14	chr2	-	2	0.0148055	0.903814	0.945726
ENSG00000132153.15	chr3	+	2	0.014287	0.905505	0.946979
ENSG00000144366.16	chr2	+	2	0.0140227	0.906379	0.947376
ENSG00000162670.11	chr1	-	2	0.0131932	0.909177	0.949783
ENSG00000126456.16	chr19	-	2	0.0127826	0.910595	0.950497
ENSG00000102226.10	chrX	+	2	0.0126613	0.911019	0.950497
ENSG00000215252.11	chr15	-	2	0.0123083	0.912263	0.950497
ENSG00000109452.12	chr4	-	2	0.0122513	0.912465	0.950497
ENSG00000119927.14	chr10	-	2	0.012152	0.912819	0.950497
ENSG00000171425.10	chr19	+	2	0.0118378	0.913949	0.950497
ENSG00000228794.10	chr1	+	2	0.0118127	0.91404	0.950497
ENSG00000141012.13	chr16	-	2	0.0118061	0.914064	0.950497
ENSG00000109572.14	chr4	+	2	0.011608	0.914785	0.950497
ENSG00000272288.6	chr6	+	2	0.0115996	0.914816	0.950497
ENSG00000115468.12	chr2	+	2	0.0114046	0.915532	0.950726
ENSG00000173848.19	chr10	+	2	0.0110883	0.916707	0.951431
ENSG00000184113.9	chr22	-	2	0.0104831	0.919004	0.953299
ENSG00000197879.17	chr17	-	3	0.0832877	0.920209	0.954033
ENSG00000131089.17	chrX	-	3	0.0819795	0.92141	0.954251
ENSG00000163848.20	chr3	-	2	0.00986626	0.921415	0.954251
ENSG00000171988.19	chr10	-	3	0.0788103	0.924326	0.956749
ENSG00000106992.19	chr9	-	2	0.00885003	0.925559	0.957509
ENSG00000159314.11	chr17	-	3	0.0761794	0.926753	0.957848
ENSG00000130294.18	chr2	-	2	0.00841329	0.927413	0.957848
ENSG00000240583.14	chr7	+	3	0.0749062	0.927931	0.957848
ENSG00000135631.17	chr2	-	2	0.00824887	0.928124	0.957848
ENSG00000086758.16	chrX	-	2	0.00818935	0.928383	0.957848
ENSG00000107968.10	chr10	+	2	0.00800172	0.929206	0.958181
ENSG00000223695.1	chr22	+	2	0.00786151	0.929827	0.958307
ENSG00000146729.10	chr7	+	2	0.00756912	0.931141	0.959143
ENSG00000124588.22	chr6	+	2	0.00745985	0.931639	0.959143
ENSG00000131446.17	chr5	-	4	0.14483	0.932646	0.959665
ENSG00000085563.15	chr7	-	2	0.00707513	0.933421	0.959947
ENSG00000125741.5	chr19	-	2	0.00670075	0.935202	0.960881
ENSG00000128567.17	chr7	-	2	0.00663705	0.93551	0.960881
ENSG00000178096.9	chr1	+	2	0.00647416	0.936304	0.960881
ENSG00000168071.22	chr11	+	2	0.00637149	0.93681	0.960881
ENSG00000178796.13	chr1	+	2	0.00636682	0.936833	0.960881
ENSG00000179583.20	chr16	+	4	0.133663	0.939672	0.963277
ENSG00000265681.7	chr18	-	2	0.00561384	0.940679	0.963794
ENSG00000173406.16	chr1	-	2	0.00520512	0.942875	0.965528
ENSG00000105220.17	chr19	+	3	0.0570498	0.944606	0.966325
ENSG00000129521.15	chr14	-	2	0.00488418	0.944661	0.966325
ENSG00000123154.12	chr19	+	3	0.05641	0.945209	0.966371
ENSG00000132386.11	chr17	+	2	0.00445751	0.947129	0.967475
ENSG00000017427.17	chr12	-	2	0.00442899	0.947299	0.967475
ENSG00000133027.18	chr17	-	2	0.00385147	0.95085	0.970585
ENSG00000077684.16	chr4	+	2	0.00368952	0.951893	0.971133
ENSG00000116731.22	chr1	+	2	0.00333428	0.954265	0.973035
ENSG00000135905.20	chr2	-	2	0.00300778	0.956559	0.974737
ENSG00000136758.19	chr10	-	2	0.00295387	0.95695	0.974737
ENSG00000165410.15	chr14	-	2	0.00256254	0.9599	0.977223
ENSG00000173801.17	chr17	-	2	0.00248385	0.96052	0.977335
ENSG00000053918.18	chr11	+	2	0.00238073	0.961348	0.977428
ENSG00000072818.12	chr17	+	2	0.00234606	0.96163	0.977428
ENSG00000169519.21	chr11	+	2	0.00227826	0.962188	0.977477
ENSG00000164713.10	chr7	+	3	0.034395	0.966212	0.980597
ENSG00000156299.13	chr21	-	2	0.00177131	0.966656	0.980597
ENSG00000235927.4	chr1	-	2	0.00173019	0.967045	0.980597
ENSG00000073578.17	chr5	+	3	0.0329093	0.967646	0.980597
ENSG00000139567.13	chr12	+	3	0.0327341	0.967816	0.980597
ENSG00000101665.9	chr18	-	2	0.00152188	0.969092	0.981372
ENSG00000119640.9	chr14	-	2	0.00137059	0.970667	0.982124
ENSG00000082397.18	chr18	-	2	0.00135279	0.970858	0.982124
ENSG00000095370.20	chr9	-	3	0.0285881	0.971832	0.982328
ENSG00000145390.11	chr4	+	2	0.00124132	0.972084	0.982328
ENSG00000154710.18	chr7	+	2	0.000964867	0.975387	0.984877
ENSG00000161955.16	chr17	+	2	0.000918884	0.975981	0.984877
ENSG00000134905.17	chr13	-	2	0.000767543	0.978047	0.984877
ENSG00000102678.7	chr13	+	2	0.000764541	0.97809	0.984877
ENSG00000170906.16	chr19	+	2	0.000742696	0.978405	0.984877
ENSG00000126804.13	chr14	+	2	0.000740178	0.978442	0.984877
ENSG00000146701.12	chr7	+	2	0.00073293	0.978548	0.984877
ENSG00000196482.18	chr1	-	5	0.109456	0.9789	0.984877
ENSG00000130985.17	chrX	+	2	0.000687155	0.979228	0.984877
ENSG00000173272.16	chr2	-	2	0.000438751	0.983401	0.988555
ENSG00000166451.14	chr16	+	2	0.000388037	0.98439	0.989031
ENSG00000187514.17	chr2	+	2	0.00035631	0.985042	0.989167
ENSG00000160299.17	chr21	+	2	0.00030297	0.98621	0.989823
ENSG00000083312.18	chr5	+	2	0.000272831	0.98691	0.990007
ENSG00000036549.13	chr1	-	2	0.000166471	0.989775	0.99187
ENSG00000099968.18	chr22	+	3	0.0102526	0.989802	0.99187
ENSG00000114062.22	chr15	-	2	7.0138e-05	0.993363	0.994919
ENSG00000068724.17	chr2	+	2	1.12187e-05	0.997346	0.997643
ENSG00000137094.15	chr9	+	3	0.00263884	0.997365	0.997643
ENSG00000103034.14	chr16	+	4	0.0142954	0.997643	0.997643

## Sheet: CAGE.DPU.F.Healthy.Atrium
geneId	cluster_chr	cluster_strand	NExons	gene.F	P.Value	FDR
ENSG00000087460.28	chr20	+	5	27.4173	3.28193e-16	6.29475e-13
ENSG00000119729.12	chr2	+	3	45.0144	1.29065e-13	7.87201e-11
ENSG00000102804.15	chr13	-	4	29.2121	1.31184e-13	7.87201e-11
ENSG00000130255.13	chr19	+	2	96.3736	1.64171e-13	7.87201e-11
ENSG00000112096.19	chr6	-	3	43.4323	4.02339e-13	1.54337e-10
ENSG00000099875.16	chr19	-	2	87.4407	8.53418e-13	2.68493e-10
ENSG00000211445.12	chr5	+	3	40.7486	9.79901e-13	2.68493e-10
ENSG00000132819.17	chr20	+	2	85.9988	1.12472e-12	2.69652e-10
ENSG00000020577.14	chr14	+	5	19.7743	1.44843e-12	3.08676e-10
ENSG00000145860.12	chr5	-	2	71.964	1.94477e-11	3.73008e-09
ENSG00000231500.7	chr6	+	2	64.896	1.00854e-10	1.75853e-08
ENSG00000101160.15	chr20	-	3	31.4849	1.10729e-10	1.76982e-08
ENSG00000143321.19	chr1	-	3	31.3012	1.22437e-10	1.80641e-08
ENSG00000174437.17	chr12	+	7	11.3158	1.38295e-10	1.89464e-08
ENSG00000184220.12	chr3	+	2	61.2915	2.13485e-10	2.69738e-08
ENSG00000167978.17	chr16	+	4	20.4115	2.25016e-10	2.69738e-08
ENSG00000126247.11	chr19	+	3	29.6907	2.98988e-10	3.37328e-08
ENSG00000123349.15	chr12	+	2	58.8681	3.87063e-10	4.12437e-08
ENSG00000135404.12	chr12	-	4	19.7184	4.25053e-10	4.2908e-08
ENSG00000134419.15	chr16	-	2	57.7557	4.96876e-10	4.76504e-08
ENSG00000070404.10	chr19	+	2	57.7096	5.29339e-10	4.83463e-08
ENSG00000156256.15	chr21	+	2	57.3277	6.50625e-10	5.67226e-08
ENSG00000150938.10	chr2	+	2	54.7737	1.03555e-09	8.63556e-08
ENSG00000095787.24	chr10	+	2	53.6339	1.37872e-09	1.07368e-07
ENSG00000118046.16	chr19	+	2	53.5748	1.39947e-09	1.07368e-07
ENSG00000111961.18	chr6	+	3	26.5093	1.8601e-09	1.37218e-07
ENSG00000110651.12	chr11	+	3	26.2643	2.29437e-09	1.62985e-07
ENSG00000088808.18	chr14	-	2	51.3079	2.49739e-09	1.71071e-07
ENSG00000065320.9	chr17	+	2	50.2918	3.48398e-09	2.30423e-07
ENSG00000125818.18	chr20	+	2	49.1601	4.37603e-09	2.79774e-07
ENSG00000136436.15	chr17	+	3	24.872	4.93735e-09	3.05479e-07
ENSG00000100412.17	chr22	+	2	48.5554	5.13605e-09	3.07842e-07
ENSG00000178982.10	chr19	+	2	46.5881	8.70733e-09	5.06081e-07
ENSG00000127603.30	chr1	+	8	8.20563	9.80954e-09	5.53373e-07
ENSG00000111678.11	chr12	+	2	45.5112	1.16788e-08	6.39997e-07
ENSG00000172638.13	chr11	-	3	23.0557	1.503e-08	7.83955e-07
ENSG00000105193.9	chr19	-	2	44.7769	1.51232e-08	7.83955e-07
ENSG00000177565.18	chr3	-	2	43.6055	1.97984e-08	9.99296e-07
ENSG00000105401.9	chr19	-	2	43.2525	2.18582e-08	1.07497e-06
ENSG00000182154.8	chr9	+	2	42.5448	2.66856e-08	1.2623e-06
ENSG00000169756.16	chr2	+	3	22.1221	2.69835e-08	1.2623e-06
ENSG00000100906.11	chr14	-	2	42.8468	2.79785e-08	1.27769e-06
ENSG00000161011.20	chr5	+	3	21.9124	3.08107e-08	1.3743e-06
ENSG00000156467.10	chr8	-	3	21.8108	3.46909e-08	1.51221e-06
ENSG00000160216.21	chr21	+	3	21.3945	4.28444e-08	1.82612e-06
ENSG00000185650.10	chr14	-	2	40.5155	4.77072e-08	1.98918e-06
ENSG00000204628.12	chr5	-	5	11.5258	5.72404e-08	2.33589e-06
ENSG00000104529.17	chr8	-	2	39.3519	6.69663e-08	2.67586e-06
ENSG00000175334.8	chr11	+	2	39.2392	6.92187e-08	2.70942e-06
ENSG00000120896.13	chr8	+	3	20.4673	7.78782e-08	2.98741e-06
ENSG00000085733.16	chr11	+	2	38.6116	8.3287e-08	3.13224e-06
ENSG00000166228.9	chr10	-	2	38.0043	9.97438e-08	3.67901e-06
ENSG00000159840.16	chr7	+	3	20.0405	1.02858e-07	3.68482e-06
ENSG00000122406.14	chr1	+	2	37.8724	1.03744e-07	3.68482e-06
ENSG00000196136.18	chr14	+	2	37.7169	1.18788e-07	4.14247e-06
ENSG00000105202.9	chr19	-	2	37.2668	1.24373e-07	4.25977e-06
ENSG00000112531.17	chr6	+	2	37.2042	1.31702e-07	4.43165e-06
ENSG00000140264.21	chr15	+	3	19.673	1.34186e-07	4.43738e-06
ENSG00000087274.17	chr4	+	3	19.548	1.42164e-07	4.62152e-06
ENSG00000135900.4	chr2	+	2	37.0715	1.47109e-07	4.68044e-06
ENSG00000068383.19	chr10	+	2	36.6709	1.48856e-07	4.68044e-06
ENSG00000198125.13	chr22	-	5	10.7443	1.73886e-07	5.37924e-06
ENSG00000141867.19	chr19	-	2	36.0825	1.77984e-07	5.41862e-06
ENSG00000100097.12	chr22	+	3	19.0241	2.05971e-07	6.1727e-06
ENSG00000130522.6	chr19	-	2	35.7817	2.27173e-07	6.70334e-06
ENSG00000125520.14	chr20	+	3	18.6338	2.61167e-07	7.58968e-06
ENSG00000166681.14	chrX	+	2	34.6227	2.78793e-07	7.98096e-06
ENSG00000226306.6	chr5	+	2	34.4114	2.97702e-07	8.39696e-06
ENSG00000163605.15	chr3	+	3	18.3956	3.06493e-07	8.51961e-06
ENSG00000168958.20	chr2	+	2	34.2495	3.13093e-07	8.57875e-06
ENSG00000110700.7	chr11	-	2	34.164	3.21549e-07	8.68635e-06
ENSG00000152601.17	chr3	+	2	33.8475	3.54974e-07	9.45612e-06
ENSG00000178104.19	chr1	+	3	18.1048	3.87251e-07	1.01746e-05
ENSG00000070831.17	chr1	+	2	33.2211	4.32222e-07	1.10619e-05
ENSG00000136699.20	chr2	-	2	33.2125	4.33388e-07	1.10619e-05
ENSG00000124380.11	chr2	+	2	33.1766	4.38324e-07	1.10619e-05
ENSG00000157216.16	chr1	-	2	33.0533	4.55735e-07	1.1352e-05
ENSG00000143344.16	chr1	+	2	32.9902	4.64931e-07	1.14325e-05
ENSG00000162614.19	chr1	+	3	17.6133	5.31929e-07	1.29144e-05
ENSG00000112419.14	chr6	+	2	32.4196	5.57283e-07	1.32765e-05
ENSG00000004776.13	chr19	-	2	32.4752	5.66516e-07	1.32765e-05
ENSG00000138326.21	chr10	+	2	32.4745	5.67607e-07	1.32765e-05
ENSG00000104964.15	chr19	-	2	32.3221	5.74888e-07	1.32848e-05
ENSG00000107317.13	chr9	+	3	17.1613	7.34945e-07	1.67812e-05
ENSG00000073536.18	chr17	-	2	31.8754	7.67574e-07	1.73201e-05
ENSG00000143013.13	chr1	+	2	31.1545	8.3672e-07	1.86608e-05
ENSG00000132463.14	chr4	-	2	30.7547	9.52705e-07	2.10033e-05
ENSG00000142192.21	chr21	-	2	30.6764	9.77314e-07	2.1301e-05
ENSG00000203879.12	chrX	+	3	16.6834	9.88426e-07	2.13011e-05
ENSG00000205268.11	chr8	-	2	30.5906	1.00502e-06	2.14181e-05
ENSG00000182326.15	chr12	+	2	30.3548	1.08552e-06	2.28793e-05
ENSG00000173812.11	chr17	+	2	30.2645	1.11806e-06	2.33091e-05
ENSG00000100201.23	chr22	-	2	30.1256	1.17017e-06	2.41333e-05
ENSG00000166710.21	chr15	+	2	29.7229	1.37671e-06	2.7894e-05
ENSG00000170558.10	chr18	-	2	29.6441	1.38161e-06	2.7894e-05
ENSG00000072518.22	chr11	+	2	29.3575	1.50751e-06	3.01188e-05
ENSG00000100106.22	chr22	+	2	29.0069	1.69376e-06	3.31844e-05
ENSG00000008513.16	chr8	-	2	28.9958	1.7e-06	3.31844e-05
ENSG00000182473.22	chr17	-	2	28.9732	1.71285e-06	3.31844e-05
ENSG00000128567.17	chr7	-	2	28.6802	1.88886e-06	3.62283e-05
ENSG00000137075.18	chr9	-	3	15.729	1.92925e-06	3.66366e-05
ENSG00000167522.16	chr16	-	2	28.3986	2.07571e-06	3.90315e-05
ENSG00000144824.21	chr3	+	4	11.131	2.40799e-06	4.46906e-05
ENSG00000074416.14	chr3	-	2	28.0151	2.42327e-06	4.46906e-05
ENSG00000198563.14	chr6	-	2	27.8468	2.49983e-06	4.56636e-05
ENSG00000170421.12	chr12	-	2	27.7195	2.6099e-06	4.72243e-05
ENSG00000163171.8	chr2	-	2	27.5885	2.7285e-06	4.89091e-05
ENSG00000153250.20	chr2	-	3	15.1632	2.88416e-06	5.12205e-05
ENSG00000163565.19	chr1	+	4	10.9221	2.98951e-06	5.26045e-05
ENSG00000162512.16	chr1	-	2	27.1714	3.14462e-06	5.48307e-05
ENSG00000065427.15	chr16	-	2	27.0162	3.31589e-06	5.72961e-05
ENSG00000117616.18	chr1	-	2	26.6612	3.74506e-06	6.41342e-05
ENSG00000147684.10	chr8	+	2	26.5812	3.84952e-06	6.53396e-05
ENSG00000167658.16	chr19	-	3	14.7715	3.97634e-06	6.68625e-05
ENSG00000132471.12	chr17	-	2	26.4587	4.0153e-06	6.68625e-05
ENSG00000139644.13	chr12	+	2	26.4382	4.04382e-06	6.68625e-05
ENSG00000142875.19	chr1	+	2	26.3954	4.10398e-06	6.72772e-05
ENSG00000154678.18	chr7	-	2	26.3191	4.21337e-06	6.84851e-05
ENSG00000164587.13	chr5	-	3	14.6323	4.2882e-06	6.91158e-05
ENSG00000109390.13	chr4	-	3	14.4682	4.75412e-06	7.5622e-05
ENSG00000078304.19	chr14	+	3	14.4634	4.77073e-06	7.5622e-05
ENSG00000135486.19	chr12	+	2	25.759	5.11637e-06	8.0436e-05
ENSG00000039523.20	chr16	+	2	25.6615	5.29299e-06	8.25363e-05
ENSG00000186184.19	chr13	+	2	25.4421	5.71419e-06	8.83857e-05
ENSG00000135390.21	chr12	-	3	14.1289	6.08247e-06	9.33295e-05
ENSG00000138193.16	chr10	+	2	25.2136	6.19012e-06	9.42273e-05
ENSG00000087074.8	chr19	+	2	25.0996	6.63307e-06	0.000100175
ENSG00000106263.18	chr7	+	2	24.8251	7.09642e-06	0.000105539
ENSG00000172270.22	chr19	+	5	8.18209	7.0983e-06	0.000105539
ENSG00000169641.13	chr1	-	2	24.5664	7.77549e-06	0.000114718
ENSG00000127838.14	chr2	+	3	13.7436	8.06249e-06	0.000118045
ENSG00000078114.19	chr10	-	7	6.1094	8.34285e-06	0.000121224
ENSG00000131730.16	chr5	+	3	13.6307	8.81057e-06	0.000127058
ENSG00000083845.9	chr19	+	2	24.0202	9.44086e-06	0.000135131
ENSG00000142541.18	chr19	+	2	23.997	9.51915e-06	0.000135242
ENSG00000097007.19	chr9	+	2	23.9277	9.75763e-06	0.000137611
ENSG00000113648.16	chr5	-	2	23.791	1.02465e-05	0.00014345
ENSG00000108107.15	chr19	+	2	23.7293	1.07371e-05	0.000149231
ENSG00000179820.16	chr19	+	2	23.5203	1.12909e-05	0.000155798
ENSG00000131873.7	chr15	-	2	23.3628	1.19488e-05	0.000163044
ENSG00000119335.17	chr9	+	2	23.3542	1.1986e-05	0.000163044
ENSG00000144579.8	chr2	+	2	23.2438	1.24724e-05	0.000168465
ENSG00000119950.21	chr10	+	3	13.1308	1.26758e-05	0.000170015
ENSG00000145592.14	chr5	-	2	23.2348	1.2778e-05	0.000170195
ENSG00000008294.21	chr17	-	2	23.1398	1.29499e-05	0.000171296
ENSG00000196628.20	chr18	-	6	6.6276	1.38139e-05	0.000181474
ENSG00000213160.10	chr2	+	2	22.9223	1.401e-05	0.000182798
ENSG00000099622.14	chr19	+	3	12.9607	1.43861e-05	0.000186437
ENSG00000135387.21	chr11	+	2	22.7669	1.4823e-05	0.000189802
ENSG00000138606.19	chr15	-	2	22.763	1.48437e-05	0.000189802
ENSG00000136942.15	chr9	-	3	12.8449	1.5723e-05	0.000199714
ENSG00000071082.11	chr2	+	2	22.6062	1.60342e-05	0.000201414
ENSG00000049759.20	chr18	+	2	22.5454	1.60669e-05	0.000201414
ENSG00000170776.22	chr15	+	4	9.37013	1.65023e-05	0.000205528
ENSG00000120690.16	chr13	-	2	22.3889	1.70117e-05	0.000210506
ENSG00000143799.14	chr1	-	2	22.2717	1.7756e-05	0.000218308
ENSG00000221983.8	chr19	+	2	22.2328	1.80107e-05	0.000219754
ENSG00000198336.9	chr17	+	3	12.6562	1.81079e-05	0.000219754
ENSG00000134954.14	chr11	-	2	22.2017	1.82174e-05	0.000219754
ENSG00000198832.10	chr22	-	2	22.1796	1.83653e-05	0.000220153
ENSG00000167994.13	chr11	-	2	22.1264	1.87267e-05	0.000223092
ENSG00000185201.17	chr11	+	2	22.0778	1.90641e-05	0.00022571
ENSG00000119139.21	chr9	+	3	12.572	1.9242e-05	0.000226418
ENSG00000110955.9	chr12	-	3	12.5523	1.97954e-05	0.000231509
ENSG00000140403.12	chr15	+	2	21.979	2.01969e-05	0.000234774
ENSG00000152894.15	chr6	-	2	21.8572	2.06743e-05	0.000237808
ENSG00000282221.1	chr1	+	2	21.8531	2.07059e-05	0.000237808
ENSG00000173641.18	chr1	-	2	21.7771	2.17017e-05	0.000247761
ENSG00000225663.8	chr17	-	2	21.6427	2.23764e-05	0.000253952
ENSG00000198363.18	chr8	-	3	12.3355	2.2993e-05	0.000259415
ENSG00000011465.18	chr12	-	5	7.36544	2.41109e-05	0.000268951
ENSG00000197746.14	chr10	-	3	12.2988	2.41187e-05	0.000268951
ENSG00000197530.12	chr1	+	2	21.4119	2.43723e-05	0.000270209
ENSG00000124225.16	chr20	-	2	21.2969	2.54343e-05	0.000280362
ENSG00000008838.20	chr17	-	2	21.264	2.70339e-05	0.000296292
ENSG00000140416.23	chr15	+	7	5.57129	2.77066e-05	0.000301939
ENSG00000100234.12	chr22	+	2	21.0149	2.82491e-05	0.000306112
ENSG00000197182.14	chr22	+	3	12.0551	2.84278e-05	0.000306318
ENSG00000144935.15	chr3	+	2	20.8195	3.0388e-05	0.000325207
ENSG00000205542.11	chrX	+	2	20.8668	3.052e-05	0.000325207
ENSG00000125844.16	chr20	-	2	20.6992	3.17886e-05	0.000336853
ENSG00000075624.17	chr7	-	2	20.7568	3.21629e-05	0.00033686
ENSG00000140105.18	chr14	-	2	20.7136	3.23136e-05	0.00033686
ENSG00000172037.14	chr3	-	2	20.6553	3.23161e-05	0.00033686
ENSG00000141447.18	chr18	-	2	20.5542	3.35663e-05	0.000348
ENSG00000142599.19	chr1	-	6	6.09831	3.71795e-05	0.000383389
ENSG00000120333.4	chr1	-	2	20.2613	3.74796e-05	0.000384416
ENSG00000107816.17	chr10	+	2	20.223	3.80257e-05	0.000387943
ENSG00000167244.21	chr11	-	4	8.55562	4.17341e-05	0.000423524
ENSG00000140743.8	chr16	-	2	19.9363	4.2384e-05	0.000427855
ENSG00000112773.16	chr6	-	2	19.7802	4.49718e-05	0.000451601
ENSG00000114854.8	chr3	-	2	19.7393	4.56771e-05	0.000456295
ENSG00000166949.17	chr15	+	2	19.6658	4.69735e-05	0.000466814
ENSG00000141905.19	chr19	+	7	5.32032	4.75311e-05	0.000469921
ENSG00000182149.21	chr16	+	2	19.5593	4.89199e-05	0.000481172
ENSG00000115306.16	chr2	+	3	11.2943	5.08619e-05	0.00049772
ENSG00000173918.15	chr17	+	5	6.85545	5.21973e-05	0.000505643
ENSG00000174282.12	chr17	-	2	19.3895	5.21988e-05	0.000505643
ENSG00000170485.17	chr2	+	2	19.3463	5.3068e-05	0.000511479
ENSG00000165119.21	chr9	-	2	19.2319	5.54468e-05	0.000530492
ENSG00000180879.14	chrX	+	2	19.2123	5.5866e-05	0.000530492
ENSG00000106631.8	chr7	-	2	19.2834	5.58704e-05	0.000530492
ENSG00000129991.13	chr19	-	2	19.2243	5.64887e-05	0.000533721
ENSG00000196712.18	chr17	+	2	19.1416	5.7402e-05	0.000539691
ENSG00000275215.1	chr21	+	2	19.0008	6.05953e-05	0.000566935
ENSG00000153113.24	chr5	+	5	6.74027	6.18892e-05	0.000576231
ENSG00000132507.18	chr17	+	2	18.8995	6.3009e-05	0.000582563
ENSG00000117228.11	chr1	-	2	18.9668	6.31768e-05	0.000582563
ENSG00000184007.22	chr1	-	3	11.0008	6.38156e-05	0.000585638
ENSG00000101333.18	chr20	+	2	18.8387	6.45025e-05	0.000589122
ENSG00000040341.18	chr8	-	2	18.757	6.6571e-05	0.000605133
ENSG00000184840.12	chr5	+	2	18.6341	6.9812e-05	0.000631601
ENSG00000196419.13	chr22	+	2	18.6129	7.039e-05	0.000632119
ENSG00000143337.19	chr1	+	2	18.5967	7.08312e-05	0.000632119
ENSG00000147403.18	chrX	+	2	18.6094	7.0858e-05	0.000632119
ENSG00000170439.7	chr12	+	2	18.5535	7.2028e-05	0.000639582
ENSG00000197111.16	chr12	+	3	10.8444	7.26845e-05	0.000642437
ENSG00000149925.22	chr16	+	4	8.07791	7.34459e-05	0.000646189
ENSG00000167815.12	chr19	-	2	18.4511	7.49486e-05	0.0006564
ENSG00000141971.13	chr19	+	2	18.3951	7.65973e-05	0.000667789
ENSG00000150995.20	chr3	+	2	18.3716	7.7299e-05	0.000670857
ENSG00000050165.18	chr11	-	3	10.749	7.83653e-05	0.000677048
ENSG00000166402.9	chr11	+	2	18.1197	8.52744e-05	0.000733436
ENSG00000116754.13	chr1	+	2	18.0745	8.67927e-05	0.000743162
ENSG00000075240.17	chr22	+	2	17.9916	8.96527e-05	0.00076424
ENSG00000067182.8	chr12	-	2	17.9083	9.26265e-05	0.000786096
ENSG00000063177.13	chr19	-	2	17.8565	9.45283e-05	0.000798702
ENSG00000099204.20	chr10	-	5	6.43426	9.88497e-05	0.000829701
ENSG00000131981.16	chr14	+	3	10.4329	9.93642e-05	0.000829701
ENSG00000087095.13	chr17	+	2	17.7261	9.9495e-05	0.000829701
ENSG00000075711.21	chr3	-	2	17.7108	0.000100094	0.000831086
ENSG00000051523.11	chr16	-	2	17.692	0.000100836	0.000831455
ENSG00000160877.6	chr19	+	2	17.6753	0.000101501	0.000831455
ENSG00000231607.13	chr13	-	2	17.6726	0.000101611	0.000831455
ENSG00000012061.16	chr19	-	5	6.41462	0.000101873	0.000831455
ENSG00000157654.19	chr9	+	7	4.96755	0.000104393	0.000844942
ENSG00000159069.14	chr9	-	2	17.6036	0.000104406	0.000844942
ENSG00000132475.10	chr17	-	3	10.377	0.000105748	0.000852207
ENSG00000139146.14	chr12	-	2	17.522	0.000107821	0.000865277
ENSG00000185215.11	chr14	+	2	17.4976	0.000116822	0.0009316
ENSG00000117859.19	chr1	+	2	17.309	0.000117289	0.0009316
ENSG00000167468.18	chr19	+	2	17.3035	0.000117543	0.0009316
ENSG00000135424.18	chr12	-	2	17.2455	0.000120275	0.000949328
ENSG00000185787.15	chr15	+	2	17.2294	0.000121046	0.000951497
ENSG00000160972.9	chr8	+	2	17.0409	0.000130452	0.00102126
ENSG00000088986.11	chr12	+	2	16.9982	0.000132687	0.00103453
ENSG00000171853.16	chr2	+	3	10.0305	0.000136415	0.00105929
ENSG00000026025.16	chr10	+	3	10.0183	0.000139519	0.00107902
ENSG00000153187.20	chr1	-	4	7.46622	0.000147841	0.00113879
ENSG00000156298.13	chrX	+	2	16.6735	0.000151043	0.0011588
ENSG00000070778.13	chr14	-	2	16.6468	0.000152664	0.00116366
ENSG00000183255.12	chr21	-	2	16.6431	0.00015289	0.00116366
ENSG00000131759.18	chr17	+	3	9.73406	0.000172581	0.00130834
ENSG00000157514.16	chrX	-	2	16.3064	0.000175024	0.00132164
ENSG00000175084.12	chr2	+	4	7.32948	0.000178599	0.00134334
ENSG00000112992.18	chr5	+	2	16.0722	0.000192371	0.00144128
ENSG00000196562.14	chr20	-	2	16.0211	0.000196385	0.00146563
ENSG00000183955.13	chr12	+	2	16.0095	0.000197311	0.00146683
ENSG00000149932.17	chr16	+	2	15.921	0.00020451	0.00151448
ENSG00000205560.13	chr22	-	2	15.8978	0.00020645	0.00152049
ENSG00000144560.15	chr3	-	4	7.17759	0.000207641	0.00152049
ENSG00000134321.13	chr2	+	2	16.0472	0.0002077	0.00152049
ENSG00000080503.24	chr9	+	4	7.09438	0.000229085	0.00166876
ENSG00000145901.16	chr5	-	2	15.7012	0.000230374	0.00166876
ENSG00000134775.15	chr18	+	2	15.626	0.000230564	0.00166876
ENSG00000178882.15	chr12	+	2	15.616	0.000231504	0.00166926
ENSG00000166326.7	chr11	+	2	15.5235	0.000240407	0.00172535
ENSG00000142676.14	chr1	+	2	15.5875	0.000241081	0.00172535
ENSG00000213465.8	chr11	+	2	15.4754	0.000245179	0.00174816
ENSG00000172765.17	chr3	-	2	15.4638	0.000246342	0.00174994
ENSG00000143353.12	chr1	+	2	15.4387	0.000248886	0.00176149
ENSG00000132002.9	chr19	-	2	15.5687	0.000250306	0.00176502
ENSG00000111912.20	chr6	+	4	7.01672	0.000253181	0.00177347
ENSG00000164597.15	chr7	-	3	9.25406	0.000253352	0.00177347
ENSG00000134905.17	chr13	-	2	15.3498	0.000258101	0.00179274
ENSG00000074964.17	chr1	+	2	15.3474	0.000258357	0.00179274
ENSG00000158158.12	chr2	+	2	15.3422	0.00025891	0.00179274
ENSG00000146540.15	chr7	-	3	9.19625	0.000265413	0.00183116
ENSG00000143947.15	chr2	+	2	15.2661	0.000267115	0.0018363
ENSG00000138162.19	chr10	+	4	6.95009	0.000271752	0.0018615
ENSG00000112936.19	chr5	+	4	6.9164	0.000286577	0.00195607
ENSG00000106025.9	chr7	-	2	15.0511	0.000291789	0.00198327
ENSG00000136261.15	chr7	+	2	15.0612	0.000292978	0.00198327
ENSG00000121057.13	chr17	+	2	15.0327	0.000294005	0.00198327
ENSG00000102531.16	chr13	+	3	9.06638	0.000294699	0.00198327
ENSG00000198034.11	chrX	-	2	14.9956	0.000298533	0.00200205
ENSG00000015153.15	chr12	-	2	14.9818	0.000300237	0.00200646
ENSG00000093072.18	chr22	-	2	14.9721	0.000304195	0.00202586
ENSG00000172239.14	chr5	-	2	14.931	0.000306592	0.00203475
ENSG00000228474.6	chr2	-	2	14.8382	0.000318576	0.002107
ENSG00000088992.18	chr12	-	2	14.8132	0.000325256	0.00214378
ENSG00000142173.16	chr21	+	4	6.77293	0.000338127	0.00222098
ENSG00000004478.8	chr12	+	2	14.6821	0.000339838	0.00222461
ENSG00000008256.16	chr7	-	2	14.6576	0.00034331	0.00223969
ENSG00000167106.12	chr9	-	3	8.87235	0.000344772	0.0022416
ENSG00000137275.16	chr6	+	2	14.6165	0.000349207	0.00226277
ENSG00000078808.19	chr1	-	2	14.6031	0.000351159	0.00226775
ENSG00000115602.17	chr2	+	2	14.7046	0.000356788	0.00229637
ENSG00000069020.18	chr5	+	4	6.68181	0.000373792	0.00239777
ENSG00000196352.16	chr1	+	2	14.4247	0.000378189	0.00241789
ENSG00000072778.20	chr17	+	4	6.65951	0.000383968	0.00244668
ENSG00000197360.9	chr19	-	2	14.313	0.000396223	0.00251641
ENSG00000125746.18	chr19	-	2	14.2981	0.000398698	0.00252377
ENSG00000069399.15	chr19	+	2	14.2715	0.000413846	0.00261104
ENSG00000114923.17	chr2	+	4	6.52079	0.000452966	0.00284119
ENSG00000133069.17	chr1	+	3	8.53592	0.000453287	0.00284119
ENSG00000167701.14	chr8	+	2	13.9271	0.000465732	0.00290969
ENSG00000104904.12	chr19	+	2	13.777	0.000497279	0.00309669
ENSG00000158417.11	chr2	+	2	13.7593	0.000499815	0.00310241
ENSG00000168273.8	chr3	+	2	13.681	0.000516619	0.00319637
ENSG00000115685.15	chr2	+	2	13.6626	0.000520637	0.00321088
ENSG00000074181.9	chr19	-	2	13.6743	0.000522528	0.00321221
ENSG00000077009.13	chr19	+	3	8.32554	0.000538426	0.00329936
ENSG00000043143.21	chr5	+	3	8.31587	0.000542713	0.00331504
ENSG00000124942.14	chr11	-	3	8.29901	0.000550273	0.00335055
ENSG00000137449.17	chr4	+	2	13.4787	0.000562769	0.00341579
ENSG00000102606.18	chr13	+	4	6.32532	0.000572386	0.00346321
ENSG00000084234.18	chr11	+	3	8.23756	0.000578746	0.00347543
ENSG00000254772.10	chr11	-	2	13.4084	0.000579806	0.00347543
ENSG00000135926.15	chr2	-	4	6.31453	0.000579842	0.00347543
ENSG00000183072.10	chr5	-	2	13.3765	0.000587714	0.00351164
ENSG00000109971.14	chr11	-	3	8.22432	0.00059421	0.00353942
ENSG00000108823.16	chr17	+	2	13.2934	0.000608854	0.00361543
ENSG00000143198.13	chr1	+	3	8.16931	0.000612151	0.00362378
ENSG00000126709.16	chr1	-	2	13.2974	0.000621887	0.00367009
ENSG00000186439.14	chr6	-	2	13.1986	0.000633947	0.00372822
ENSG00000008324.12	chr3	+	2	13.1877	0.000636887	0.00372822
ENSG00000077044.11	chr2	+	2	13.1892	0.000637568	0.00372822
ENSG00000136560.14	chr2	+	2	13.0812	0.000666491	0.0038855
ENSG00000154262.13	chr17	-	2	13.07	0.0006697	0.00389238
ENSG00000140632.17	chr16	-	3	7.99113	0.000709009	0.00409869
ENSG00000014641.21	chr2	+	2	12.9576	0.000709471	0.00409869
ENSG00000093144.19	chr6	-	2	12.9097	0.000717237	0.00413111
ENSG00000108924.14	chr17	+	3	7.96189	0.000726352	0.00417109
ENSG00000137106.18	chr9	+	2	12.8579	0.000733352	0.00419872
ENSG00000179604.10	chr17	-	2	12.8389	0.000739355	0.00422049
ENSG00000159403.18	chr12	-	2	12.8314	0.000741764	0.00422167
ENSG00000267577.1	chr19	+	2	12.6962	0.00078615	0.00446105
ENSG00000160408.15	chr9	-	2	12.6124	0.000815049	0.0046114
ENSG00000109686.19	chr4	-	3	7.72616	0.000883042	0.0049814
ENSG00000136160.17	chr13	-	2	12.3403	0.000916754	0.00515641
ENSG00000148180.21	chr9	+	6	4.39968	0.000929507	0.00521285
ENSG00000101224.18	chr20	+	2	12.277	0.000942297	0.00526822
ENSG00000051620.11	chr6	+	2	12.2707	0.000944873	0.00526822
ENSG00000038382.20	chr5	+	3	7.63857	0.000954303	0.00530537
ENSG00000149273.15	chr11	+	2	12.2491	0.000959757	0.00532027
ENSG00000165629.20	chr10	+	3	7.59624	0.00098384	0.00543805
ENSG00000080854.16	chr11	-	2	12.0192	0.00105417	0.00581005
ENSG00000185088.14	chr15	-	2	11.9485	0.0010872	0.00597495
ENSG00000173801.17	chr17	-	2	11.8923	0.00111428	0.00610624
ENSG00000177606.8	chr1	-	2	11.9736	0.0011178	0.00610809
ENSG00000120729.10	chr5	+	2	11.9487	0.00113338	0.00617562
ENSG00000182196.13	chr12	+	2	11.7766	0.00117216	0.00636887
ENSG00000173372.17	chr1	+	2	11.8009	0.00118165	0.00640226
ENSG00000137573.14	chr8	+	2	11.7258	0.00119858	0.0064757
ENSG00000187778.14	chr12	-	2	11.6781	0.00122395	0.0065942
ENSG00000123154.12	chr19	+	3	7.31462	0.00124491	0.00668836
ENSG00000102265.12	chrX	+	3	7.31223	0.00125688	0.00673379
ENSG00000092098.17	chr14	+	2	11.5549	0.00129215	0.00690344
ENSG00000198393.8	chr12	+	2	11.5152	0.00131495	0.00700575
ENSG00000166741.8	chr11	+	2	11.5687	0.00133224	0.0070782
ENSG00000086015.22	chr1	+	2	11.4214	0.00137049	0.00726135
ENSG00000167792.13	chr11	+	3	7.17985	0.00139406	0.00736587
ENSG00000161013.17	chr5	-	2	11.3624	0.00140671	0.00741229
ENSG00000111642.16	chr12	-	3	7.14326	0.00143763	0.00755446
ENSG00000105379.10	chr19	-	2	11.3111	0.00144877	0.00759219
ENSG00000100320.23	chr22	-	2	11.2553	0.00147506	0.00768972
ENSG00000134287.10	chr12	-	2	11.2548	0.0014754	0.00768972
ENSG00000052126.15	chr12	+	2	11.2384	0.00148613	0.00772464
ENSG00000105855.10	chr7	+	2	11.213	0.00150296	0.00779104
ENSG00000008441.18	chr19	+	2	11.1528	0.00154498	0.00798605
ENSG00000102024.18	chrX	+	2	11.1452	0.00154891	0.00798605
ENSG00000102316.17	chrX	+	3	7.02857	0.00158351	0.00814254
ENSG00000266094.8	chr1	+	2	11.0764	0.00159706	0.00819025
ENSG00000275832.5	chr17	+	3	7.01009	0.00160839	0.00822637
ENSG00000153774.9	chr16	-	2	11.0421	0.00162161	0.00827193
ENSG00000072062.15	chr19	-	2	11.0003	0.00165205	0.00840488
ENSG00000173175.15	chr3	-	3	6.97087	0.00166254	0.00843146
ENSG00000271952.2	chr2	+	2	10.9812	0.00166619	0.00843146
ENSG00000130175.10	chr19	+	2	10.9755	0.00167047	0.00843146
ENSG00000270647.6	chr17	+	2	10.9521	0.00168795	0.00849737
ENSG00000132466.19	chr4	-	2	10.9057	0.00172326	0.00865241
ENSG00000092841.19	chr12	+	2	10.8706	0.0017505	0.00876619
ENSG00000178573.7	chr16	-	2	10.8627	0.00175675	0.0087746
ENSG00000143761.16	chr1	+	2	10.8416	0.00177337	0.00883462
ENSG00000117419.16	chr1	-	2	10.8128	0.00179634	0.00892587
ENSG00000131196.18	chr18	+	2	10.8463	0.00182222	0.00903106
ENSG00000198276.16	chr20	-	2	10.7623	0.00183742	0.00908293
ENSG00000017260.20	chr3	+	2	10.7478	0.00184947	0.00911897
ENSG00000168556.7	chr4	+	2	10.7383	0.00185731	0.00913416
ENSG00000151414.15	chr1	+	2	10.6565	0.00192674	0.00944922
ENSG00000100364.19	chr22	-	2	10.6405	0.00194061	0.00944922
ENSG00000172354.10	chr7	+	2	10.6405	0.00194068	0.00944922
ENSG00000164741.15	chr8	-	3	6.78561	0.00194484	0.00944922
ENSG00000068724.17	chr2	+	2	10.6316	0.00194839	0.00944922
ENSG00000110429.14	chr11	-	2	10.6287	0.00195093	0.00944922
ENSG00000244687.12	chr20	-	2	10.6227	0.0019562	0.00945084
ENSG00000139579.13	chr12	+	2	10.597	0.00197894	0.00953671
ENSG00000189337.17	chr1	+	2	10.575	0.0019986	0.00960086
ENSG00000187954.13	chr8	-	2	10.571	0.00200226	0.00960086
ENSG00000149131.17	chr11	+	2	10.5548	0.00201692	0.00964701
ENSG00000079819.19	chr6	-	2	10.5355	0.00203451	0.00970694
ENSG00000130985.17	chrX	+	2	10.4871	0.00207936	0.00988489
ENSG00000113580.15	chr5	-	2	10.4807	0.00208537	0.00988489
ENSG00000167863.12	chr17	-	2	10.4786	0.00208727	0.00988489
ENSG00000109099.16	chr17	-	4	5.22874	0.00215976	0.010203
ENSG00000265681.7	chr18	-	2	10.3344	0.00222777	0.0104985
ENSG00000019144.19	chr11	+	4	5.17645	0.00230236	0.0108233
ENSG00000130600.19	chr11	-	3	6.56112	0.00235392	0.0110387
ENSG00000169122.11	chr8	+	2	10.1919	0.00237626	0.0111163
ENSG00000079215.15	chr5	+	3	6.53899	0.00239875	0.0111942
ENSG00000116667.15	chr1	+	2	10.1123	0.00246372	0.0114695
ENSG00000125834.13	chr20	+	2	10.0556	0.00252814	0.0117173
ENSG00000103495.14	chr16	+	2	10.0547	0.00252918	0.0117173
ENSG00000283154.2	chr3	+	2	10.039	0.00254728	0.0117727
ENSG00000237125.11	chr4	+	3	6.44295	0.00260377	0.0120049
ENSG00000172493.22	chr4	+	3	6.43799	0.00261482	0.0120269
ENSG00000079805.18	chr19	+	2	9.96526	0.00263431	0.0120876
ENSG00000242125.3	chr1	+	2	9.93195	0.00267464	0.0122175
ENSG00000161642.18	chr12	-	2	9.94256	0.00267537	0.0122175
ENSG00000151835.16	chr13	-	2	9.88635	0.00273091	0.0124194
ENSG00000163681.16	chr3	+	4	5.03657	0.00273252	0.0124194
ENSG00000113594.10	chr5	-	2	9.87607	0.00274376	0.012441
ENSG00000120071.15	chr17	-	2	9.90018	0.00275183	0.0124481
ENSG00000167460.17	chr19	+	3	6.37186	0.00279438	0.0126109
ENSG00000126457.22	chr19	+	3	6.35409	0.00280946	0.0126492
ENSG00000129521.15	chr14	-	2	9.8307	0.00281831	0.0126593
ENSG00000196924.19	chrX	-	3	6.35399	0.0028275	0.0126709
ENSG00000162599.17	chr1	+	2	9.79176	0.00285164	0.0127493
ENSG00000138185.20	chr10	+	2	9.78202	0.00286439	0.0127684
ENSG00000173848.19	chr10	+	2	9.77741	0.00287044	0.0127684
ENSG00000126777.18	chr14	+	3	6.33647	0.00287947	0.0127684
ENSG00000053254.16	chr14	-	3	6.32412	0.00288254	0.0127684
ENSG00000145012.13	chr3	+	3	6.32676	0.00289286	0.0127718
ENSG00000226742.4	chr18	+	2	9.75071	0.00290577	0.0127718
ENSG00000126267.11	chr19	+	2	9.76056	0.00290813	0.0127718
ENSG00000079277.22	chr1	-	2	9.74364	0.0029152	0.0127718
ENSG00000204634.13	chr2	-	2	9.74259	0.00291661	0.0127718
ENSG00000116132.12	chr1	+	3	6.30227	0.00293844	0.0128381
ENSG00000071575.11	chr2	+	2	9.69835	0.00297638	0.0129688
ENSG00000122644.13	chr7	+	2	9.69316	0.00298348	0.0129688
ENSG00000177426.22	chr18	+	3	6.2888	0.00298865	0.0129688
ENSG00000204267.16	chr6	-	2	9.64493	0.00305028	0.0132064
ENSG00000109016.17	chr17	+	2	9.62648	0.00307625	0.0132831
ENSG00000102678.7	chr13	+	2	9.62252	0.00308186	0.0132831
ENSG00000122417.15	chr1	-	2	9.52971	0.00321632	0.0138219
ENSG00000171914.16	chr15	+	2	9.52638	0.00322126	0.0138219
ENSG00000064205.11	chr20	+	2	9.56169	0.00326277	0.0139687
ENSG00000082641.16	chr17	+	3	6.17552	0.00327478	0.0139889
ENSG00000101665.9	chr18	-	2	9.48161	0.00330517	0.0140874
ENSG00000196535.17	chr17	-	2	9.45939	0.0033223	0.014129
ENSG00000196313.11	chr7	+	2	9.44802	0.00333977	0.014158
ENSG00000184640.20	chr17	+	4	4.87208	0.00334389	0.014158
ENSG00000069275.13	chr1	-	2	9.34953	0.00349528	0.0147664
ENSG00000132561.14	chr8	+	2	9.3991	0.00351402	0.0148119
ENSG00000133835.17	chr5	+	2	9.33338	0.00352149	0.0148119
ENSG00000107897.20	chr10	-	2	9.264	0.0036365	0.0152621
ENSG00000173065.13	chr17	-	2	9.21121	0.00372664	0.0155879
ENSG00000145390.11	chr4	+	2	9.20866	0.00373106	0.0155879
ENSG00000105409.19	chr19	-	2	9.20436	0.0037385	0.0155879
ENSG00000142871.18	chr1	+	2	9.21547	0.00381006	0.0158518
ENSG00000132205.11	chr18	+	2	9.13964	0.00385263	0.0159942
ENSG00000168264.11	chr1	-	2	9.12889	0.00387193	0.0160396
ENSG00000137936.18	chr1	-	2	9.03856	0.00403824	0.0166925
ENSG00000101294.18	chr20	+	2	8.93678	0.00423465	0.0174525
ENSG00000182899.17	chr3	+	2	8.95115	0.00424028	0.0174525
ENSG00000140545.15	chr15	-	2	8.93077	0.00426619	0.0175215
ENSG00000119707.14	chr14	+	2	8.87623	0.00435626	0.0178371
ENSG00000139687.16	chr13	+	2	8.87361	0.00436162	0.0178371
ENSG00000162734.13	chr1	+	2	8.83089	0.00444973	0.0181587
ENSG00000188257.12	chr1	-	2	8.87144	0.00447986	0.0182428
ENSG00000162434.13	chr1	-	2	8.80659	0.00450069	0.0182888
ENSG00000145703.16	chr5	+	2	8.77538	0.00456703	0.0185191
ENSG00000084090.14	chr2	-	2	8.74742	0.00462734	0.0187241
ENSG00000150593.18	chr10	+	2	8.73684	0.00465039	0.0187778
ENSG00000054654.19	chr14	+	4	4.59506	0.00470335	0.0189517
ENSG00000196652.12	chr7	+	2	8.70167	0.00472786	0.0190068
ENSG00000108848.16	chr17	+	3	5.7484	0.00473683	0.0190068
ENSG00000148396.18	chr9	-	2	8.64148	0.00486362	0.0194748
ENSG00000011451.21	chr19	-	3	5.71103	0.00489311	0.0195521
ENSG00000197050.11	chr19	+	2	8.59922	0.00496137	0.0197836
ENSG00000172572.7	chr12	+	2	8.5871	0.00498978	0.0198556
ENSG00000071655.18	chr19	-	2	8.55622	0.00506296	0.0200686
ENSG00000099797.15	chr19	+	2	8.55569	0.00506423	0.0200686
ENSG00000111341.10	chr12	-	2	8.588	0.00509331	0.020104
ENSG00000149591.17	chr11	+	2	8.59506	0.00509412	0.020104
ENSG00000101019.22	chr20	-	2	8.53807	0.00510651	0.0201115
ENSG00000090621.15	chr1	-	2	8.53085	0.00514591	0.0202251
ENSG00000138413.14	chr2	-	2	8.50582	0.00518484	0.0203365
ENSG00000169045.17	chr5	-	2	8.47142	0.00527718	0.0206564
ENSG00000143179.16	chr1	+	2	8.44928	0.00532527	0.0208022
ENSG00000241837.7	chr21	-	3	5.61231	0.00534486	0.0208363
ENSG00000083857.14	chr4	-	2	8.4196	0.00540057	0.0210107
ENSG00000139842.15	chr13	+	2	8.39959	0.00545199	0.0211679
ENSG00000170634.13	chr2	+	3	5.58214	0.00547404	0.0212105
ENSG00000075785.14	chr3	+	3	5.5695	0.00553474	0.0214025
ENSG00000253320.7	chr8	+	2	8.31622	0.00574421	0.0221678
ENSG00000108387.15	chr17	-	3	5.5118	0.00582049	0.0224171
ENSG00000134871.19	chr13	+	2	8.23755	0.00588776	0.0226307
ENSG00000114062.22	chr15	-	2	8.19615	0.0060049	0.0230348
ENSG00000116044.16	chr2	-	2	8.16871	0.00608387	0.0232911
ENSG00000105426.17	chr19	-	4	4.36275	0.0062803	0.0239925
ENSG00000118900.15	chr16	+	2	8.09814	0.00629208	0.0239925
ENSG00000119912.18	chr10	-	2	8.0993	0.00631336	0.0240258
ENSG00000133401.16	chr5	+	2	8.0715	0.00637585	0.0242156
ENSG00000106992.19	chr9	-	2	8.01123	0.00655886	0.0248615
ENSG00000149091.15	chr11	+	4	4.31717	0.00663122	0.0250862
ENSG00000100599.16	chr14	+	2	7.98037	0.00665646	0.0251321
ENSG00000018189.13	chr4	+	2	7.96205	0.0067151	0.025271
ENSG00000107669.18	chr10	-	2	7.96065	0.00671961	0.025271
ENSG00000109332.20	chr4	-	3	5.32516	0.0068531	0.0257226
ENSG00000132329.11	chr2	+	2	7.87595	0.00699819	0.0262159
ENSG00000179950.14	chr8	-	2	7.86745	0.00702681	0.0262718
ENSG00000198431.16	chr12	+	4	4.26517	0.00708539	0.0264392
ENSG00000117625.14	chr1	+	2	7.83817	0.00712634	0.0265404
ENSG00000133818.14	chr11	-	2	7.79078	0.00729058	0.0270995
ENSG00000018625.15	chr1	+	2	7.77991	0.00732882	0.0271889
ENSG00000109381.20	chr4	-	2	7.76197	0.0073924	0.0273246
ENSG00000128595.17	chr7	+	2	7.75776	0.00740742	0.0273246
ENSG00000198728.11	chr10	-	2	7.75756	0.00740814	0.0273246
ENSG00000032444.17	chr19	+	2	7.75293	0.00742466	0.027333
ENSG00000159023.22	chr1	+	2	7.7198	0.00754415	0.0277197
ENSG00000143995.20	chr2	+	2	7.71182	0.00757326	0.0277734
ENSG00000068308.14	chrX	-	2	7.69564	0.00763258	0.0279376
ENSG00000099968.18	chr22	+	3	5.18471	0.00775284	0.0283237
ENSG00000125107.19	chr16	-	2	7.64991	0.00780295	0.0284526
ENSG00000168675.19	chr18	+	5	3.63182	0.00783828	0.0285272
ENSG00000187535.14	chr16	-	2	7.62925	0.00788122	0.0285586
ENSG00000198482.14	chr19	+	2	7.62899	0.00788223	0.0285586
ENSG00000182175.14	chr15	-	2	7.62653	0.00789158	0.0285586
ENSG00000157540.22	chr21	+	2	7.54975	0.00819028	0.0295837
ENSG00000148411.8	chr9	-	2	7.50109	0.00838578	0.0302148
ENSG00000184752.13	chr12	-	2	7.49845	0.00839649	0.0302148
ENSG00000233237.8	chr6	-	2	7.48633	0.008446	0.0303164
ENSG00000122786.20	chr7	+	4	4.12107	0.00845633	0.0303164
ENSG00000182093.16	chr21	+	2	7.46129	0.0085493	0.0305925
ENSG00000119383.21	chr9	+	3	5.04816	0.00874411	0.0312313
ENSG00000055163.20	chr5	+	2	7.3855	0.00887133	0.0316268
ENSG00000197702.14	chr11	+	3	5.02911	0.0088924	0.0316431
ENSG00000197063.11	chr17	-	2	7.37621	0.00891032	0.0316481
ENSG00000119314.16	chr9	-	2	7.33832	0.00907627	0.0321239
ENSG00000141736.14	chr17	+	2	7.33798	0.00907776	0.0321239
ENSG00000142937.12	chr1	+	2	7.34864	0.00909731	0.0321338
ENSG00000173120.15	chr11	+	2	7.32232	0.00914733	0.0322511
ENSG00000131016.17	chr6	+	3	4.99498	0.00928637	0.0326812
ENSG00000149809.17	chr11	+	2	7.28187	0.0093296	0.0327156
ENSG00000203880.12	chr20	+	2	7.28172	0.00933025	0.0327156
ENSG00000116128.11	chr1	+	2	7.26793	0.00939327	0.032847
ENSG00000053747.17	chr18	+	3	4.96605	0.00940198	0.032847
ENSG00000258289.9	chr14	+	2	7.25674	0.00944476	0.0329087
ENSG00000082397.18	chr18	-	2	7.25474	0.00945397	0.0329087
ENSG00000165995.22	chr10	+	3	4.94213	0.00960301	0.033367
ENSG00000133142.18	chrX	+	2	7.20316	0.00971401	0.0336383
ENSG00000196914.9	chr11	+	2	7.19877	0.00971618	0.0336383
ENSG00000118785.14	chr4	+	2	7.21086	0.00981408	0.0339161
ENSG00000125730.17	chr19	-	2	7.14529	0.010006	0.0345169
ENSG00000184347.15	chr5	-	2	7.07839	0.0103066	0.0354901
ENSG00000130158.14	chr19	-	2	7.07177	0.0103401	0.0355419
ENSG00000265972.6	chr1	-	2	7.04465	0.0105094	0.0360591
ENSG00000041982.16	chr9	-	2	7.04094	0.0106711	0.0365485
ENSG00000169862.19	chr5	-	2	6.99876	0.0107179	0.0366434
ENSG00000170619.10	chr8	-	2	6.98853	0.010772	0.0367629
ENSG00000159251.8	chr15	-	4	3.92211	0.0108448	0.0368353
ENSG00000160360.13	chr9	+	3	4.80664	0.0108504	0.0368353
ENSG00000106070.20	chr7	-	2	6.97024	0.0108695	0.0368353
ENSG00000154556.18	chr4	-	7	2.87268	0.0108701	0.0368353
ENSG00000243678.12	chr17	+	2	6.96417	0.010902	0.0368784
ENSG00000104805.16	chr19	+	3	4.77828	0.0111041	0.0374959
ENSG00000151914.21	chr6	-	6	3.08808	0.0111518	0.0375908
ENSG00000152217.20	chr18	+	2	6.9123	0.0111843	0.0376343
ENSG00000093167.18	chr3	-	2	6.90831	0.0112064	0.0376425
ENSG00000136521.13	chr3	+	2	6.89998	0.0112525	0.0377314
ENSG00000197461.13	chr7	-	2	6.89288	0.011292	0.0377976
ENSG00000170525.21	chr10	+	3	4.76428	0.01137	0.0379923
ENSG00000272391.6	chr7	-	2	6.86902	0.0114258	0.0381057
ENSG00000170142.12	chr3	+	2	6.8611	0.0114706	0.0381057
ENSG00000136603.14	chr3	+	2	6.85954	0.0114794	0.0381057
ENSG00000110321.19	chr11	-	6	3.07247	0.0114834	0.0381057
ENSG00000128563.13	chr7	+	2	6.84887	0.0115402	0.038228
ENSG00000133619.17	chr7	+	2	6.84172	0.011581	0.0382971
ENSG00000136758.19	chr10	-	2	6.82679	0.0116668	0.0384786
ENSG00000236404.10	chr9	-	3	4.72177	0.011676	0.0384786
ENSG00000277791.5	chr17	+	2	6.80668	0.0117835	0.0387662
ENSG00000160808.11	chr3	-	2	6.82793	0.0118579	0.0389444
ENSG00000176978.14	chr9	-	2	6.76207	0.0120466	0.0394964
ENSG00000107771.17	chr10	+	2	6.69161	0.0124751	0.0408314
ENSG00000167766.19	chr19	-	2	6.66663	0.0126309	0.0412246
ENSG00000162591.16	chr1	-	2	6.66887	0.0126382	0.0412246
ENSG00000275915.1	chr1	+	2	6.61776	0.0129416	0.0421426
ENSG00000144802.11	chr3	+	2	6.62783	0.0129975	0.0422528
ENSG00000111077.18	chr12	+	3	4.59664	0.0130525	0.04236
ENSG00000198467.16	chr9	-	4	3.77158	0.0131016	0.0424098
ENSG00000131408.15	chr19	+	2	6.59147	0.0131121	0.0424098
ENSG00000134138.20	chr15	-	4	3.75246	0.0133741	0.0431123
ENSG00000136950.13	chr9	+	2	6.55175	0.0133742	0.0431123
ENSG00000136710.10	chr2	-	2	6.53719	0.0134718	0.0433538
ENSG00000144476.6	chr2	+	2	6.52462	0.013621	0.0437606
ENSG00000128272.16	chr22	+	2	6.50926	0.0136609	0.0437932
ENSG00000167081.18	chr9	+	2	6.50692	0.0136768	0.0437932
ENSG00000132334.17	chr10	+	3	4.54048	0.0137288	0.0438864
ENSG00000105701.16	chr19	-	3	4.53596	0.013779	0.0439735
ENSG00000011454.18	chr9	+	2	6.48754	0.0138099	0.0439989
ENSG00000055118.16	chr7	-	2	6.4769	0.013925	0.0442369
ENSG00000111913.20	chr6	-	2	6.48363	0.013936	0.0442369
ENSG00000138639.18	chr4	+	2	6.46493	0.0139669	0.0442369
ENSG00000084093.19	chr4	+	2	6.46028	0.0139994	0.0442369
ENSG00000158092.7	chr3	+	2	6.46021	0.0139999	0.0442369
ENSG00000111245.17	chr12	-	3	4.5259	0.0140572	0.0443448
ENSG00000258315.5	chr17	+	2	6.44554	0.014103	0.0444162
ENSG00000137801.11	chr15	+	2	6.46007	0.0142176	0.0446645
ENSG00000159314.11	chr17	-	3	4.50004	0.0142284	0.0446645
ENSG00000150636.17	chr18	+	2	6.41692	0.0143065	0.0447989
ENSG00000174891.13	chr3	+	2	6.41533	0.0143179	0.0447989
ENSG00000065054.14	chr16	+	3	4.47506	0.0145498	0.0454505
ENSG00000160271.16	chr9	-	3	4.45728	0.014783	0.0461038
ENSG00000179094.16	chr17	-	2	6.33485	0.0149075	0.0464166
ENSG00000182963.11	chr17	-	2	6.31284	0.0150733	0.0467864
ENSG00000177830.18	chr11	-	2	6.3126	0.0150751	0.0467864
ENSG00000120616.16	chr10	-	2	6.29026	0.0152453	0.0472382
ENSG00000173281.5	chr8	-	2	6.27995	0.0153245	0.0474072
ENSG00000152082.15	chr2	+	2	6.24916	0.0155638	0.0480698
ENSG00000196498.13	chr12	-	4	3.62871	0.0156045	0.048118
ENSG00000159176.14	chr1	-	2	6.20612	0.0159455	0.0490907
ENSG00000108389.9	chr17	-	2	6.18574	0.0160693	0.0493926
ENSG00000115459.18	chr2	+	2	6.16708	0.0162213	0.0497801
ENSG00000078246.17	chr12	+	2	6.16199	0.0162631	0.0498285
ENSG00000143226.15	chr1	+	2	6.15916	0.0165196	0.0505336
ENSG00000169946.14	chr8	+	2	6.11231	0.0166765	0.0509325
ENSG00000145362.20	chr4	+	5	3.14597	0.0168182	0.0512834
ENSG00000133027.18	chr17	-	2	6.06348	0.0170938	0.0520273
ENSG00000173928.4	chr19	+	2	6.06087	0.0171164	0.0520273
ENSG00000274104.1	chr19	-	2	6.0297	0.017389	0.0527723
ENSG00000198053.12	chr20	+	2	6.00058	0.0176477	0.0534729
ENSG00000138594.14	chr15	+	2	5.95694	0.0180433	0.0544746
ENSG00000150347.17	chr10	+	2	5.96701	0.0180454	0.0544746
ENSG00000134590.14	chrX	+	2	5.95474	0.0180635	0.0544746
ENSG00000131788.16	chr1	-	2	5.94354	0.0181667	0.0546996
ENSG00000132510.11	chr17	+	3	4.23323	0.0182511	0.0548678
ENSG00000178951.9	chr19	-	2	5.92005	0.0183851	0.0551841
ENSG00000170348.9	chr14	-	2	5.91118	0.0184683	0.0553472
ENSG00000102317.18	chrX	+	2	5.89381	0.0186323	0.0557517
ENSG00000114861.23	chr3	-	5	3.07033	0.0189343	0.0565249
ENSG00000100418.8	chr22	-	2	5.86068	0.0189497	0.0565249
ENSG00000186577.14	chr6	-	2	5.85794	0.01901	0.0565941
ENSG00000129675.16	chrX	-	2	5.85219	0.0190319	0.0565941
ENSG00000125398.8	chr17	+	2	5.81772	0.0193697	0.0575093
ENSG00000124772.12	chr6	-	3	4.15012	0.0194915	0.0577816
ENSG00000115594.12	chr2	+	3	4.15036	0.0196367	0.0581223
ENSG00000163110.15	chr4	+	3	4.14128	0.019668	0.0581253
ENSG00000060656.20	chr1	+	2	5.76418	0.0199071	0.0586656
ENSG00000164830.19	chr8	+	3	4.12574	0.019912	0.0586656
ENSG00000166508.18	chr7	-	2	5.75532	0.0199976	0.0588272
ENSG00000087086.15	chr19	+	2	5.76352	0.0200326	0.0588399
ENSG00000153904.21	chr1	-	2	5.753	0.0200666	0.0588496
ENSG00000101335.10	chr20	+	3	4.1089	0.0202888	0.0594105
ENSG00000081923.15	chr18	-	2	5.72111	0.0203511	0.059502
ENSG00000163872.16	chr3	+	2	5.70504	0.0205194	0.0599028
ENSG00000138964.17	chr22	+	2	5.69491	0.0206263	0.0601234
ENSG00000198755.11	chr6	+	2	5.68311	0.0207515	0.0603967
ENSG00000171033.13	chr8	+	2	5.66589	0.0209629	0.0608606
ENSG00000204843.13	chr2	-	3	4.06815	0.0209744	0.0608606
ENSG00000178209.16	chr8	-	7	2.56441	0.0210885	0.0610994
ENSG00000171681.12	chr12	+	2	5.63851	0.0212322	0.0614229
ENSG00000101161.8	chr20	+	2	5.62155	0.0214182	0.0618675
ENSG00000182199.11	chr12	+	3	4.02416	0.021825	0.0628729
ENSG00000140650.12	chr16	+	2	5.58437	0.0218318	0.0628729
ENSG00000149269.10	chr11	-	2	5.57314	0.0219584	0.0631427
ENSG00000177119.17	chr12	+	2	5.5493	0.0222299	0.0637747
ENSG00000111716.14	chr12	-	3	4.00773	0.0222447	0.0637747
ENSG00000138303.18	chr10	-	3	4.00068	0.0222934	0.0638191
ENSG00000080824.19	chr14	-	4	3.33799	0.0225127	0.0643508
ENSG00000062582.14	chr7	-	2	5.52419	0.0225957	0.0644506
ENSG00000116774.12	chr1	+	2	5.51602	0.0226148	0.0644506
ENSG00000181031.16	chr17	-	2	5.46557	0.023212	0.0659526
ENSG00000160299.17	chr21	+	2	5.46491	0.0232199	0.0659526
ENSG00000120742.11	chr3	-	2	5.46281	0.023245	0.0659526
ENSG00000148120.17	chr9	+	3	3.94924	0.023356	0.0661695
ENSG00000198626.17	chr1	+	3	3.94733	0.0234527	0.0663456
ENSG00000182022.18	chr10	-	2	5.43648	0.0235638	0.0665618
ENSG00000114126.18	chr3	-	3	3.92714	0.0238283	0.0672098
ENSG00000108654.16	chr17	-	4	3.27856	0.0241593	0.0679542
ENSG00000248923.1	chr5	-	2	5.41026	0.0241631	0.0679542
ENSG00000108691.9	chr17	+	2	5.40286	0.0242552	0.0681136
ENSG00000262879.6	chr17	-	2	5.37626	0.0243108	0.0681696
ENSG00000114473.14	chr3	-	3	3.87928	0.0249165	0.0697661
ENSG00000113140.11	chr5	-	2	5.32312	0.025124	0.0702445
ENSG00000060982.15	chr12	-	2	5.30463	0.0252324	0.0704452
ENSG00000245532.9	chr11	+	2	5.28988	0.02569	0.0716184
ENSG00000068024.17	chr2	-	3	3.83759	0.0258447	0.0719449
ENSG00000205581.11	chr21	-	2	5.25135	0.0259422	0.0721118
ENSG00000101997.13	chrX	+	2	5.2399	0.0260975	0.0724384
ENSG00000129353.15	chr19	+	2	5.23345	0.0261854	0.0725774
ENSG00000155657.28	chr2	-	6	2.62869	0.0263047	0.0728028
ENSG00000168386.18	chr3	-	2	5.22224	0.0263897	0.0729329
ENSG00000109756.9	chr4	+	5	2.85137	0.0266616	0.0735784
ENSG00000198160.15	chr1	+	2	5.17082	0.0270559	0.0745591
ENSG00000179833.4	chr2	-	2	5.15611	0.0272648	0.075027
ENSG00000079432.8	chr19	+	2	5.13748	0.0275319	0.0756535
ENSG00000131446.17	chr5	-	4	3.1705	0.0276526	0.0758764
ENSG00000144331.20	chr2	-	3	3.7483	0.0280427	0.0768371
ENSG00000145391.14	chr4	-	2	5.09466	0.0281564	0.0770386
ENSG00000112837.17	chr6	-	2	5.08573	0.0282885	0.0772896
ENSG00000234438.5	chr15	+	2	5.07814	0.0284014	0.0774447
ENSG00000158321.18	chr7	+	3	3.73289	0.028426	0.0774447
ENSG00000128591.16	chr7	+	2	5.03918	0.0292881	0.0796801
ENSG00000235927.4	chr1	-	2	5.00758	0.0294739	0.0800722
ENSG00000058056.10	chr3	+	3	3.68576	0.0296731	0.0802003
ENSG00000112576.13	chr6	-	2	4.99313	0.0296988	0.0802003
ENSG00000116685.16	chr1	-	2	5.01225	0.0297029	0.0802003
ENSG00000198796.7	chr18	-	2	4.99187	0.0297186	0.0802003
ENSG00000267107.8	chr19	-	3	3.68365	0.0297301	0.0802003
ENSG00000196141.14	chr2	+	2	4.9771	0.0299506	0.0806816
ENSG00000124588.22	chr6	+	2	4.9632	0.0301706	0.0811603
ENSG00000136848.17	chr9	+	4	3.09549	0.0303724	0.0815886
ENSG00000106034.18	chr7	+	2	4.93298	0.0306553	0.0822334
ENSG00000090006.18	chr19	+	3	3.64594	0.0307704	0.0824268
ENSG00000247271.7	chr11	+	2	4.88101	0.0315085	0.0842862
ENSG00000176490.5	chr19	-	2	4.84173	0.0321701	0.0859112
ENSG00000277258.5	chr17	-	2	4.83965	0.0322055	0.0859112
ENSG00000103091.15	chr16	-	2	4.83072	0.0323583	0.0861989
ENSG00000165806.21	chr10	+	2	4.8206	0.0325322	0.086542
ENSG00000118194.20	chr1	-	7	2.35986	0.0325949	0.0865886
ENSG00000130822.16	chrX	-	2	4.79646	0.0329514	0.0874146
ENSG00000115461.5	chr2	-	2	4.80119	0.0330169	0.0874674
ENSG00000173406.16	chr1	-	2	4.77911	0.0332562	0.0878679
ENSG00000138347.16	chr10	+	2	4.77934	0.0332597	0.0878679
ENSG00000135218.19	chr7	+	7	2.34457	0.033577	0.0885842
ENSG00000204084.13	chr1	-	2	4.74159	0.0339258	0.0893813
ENSG00000158352.17	chrX	-	2	4.72128	0.0342943	0.0902284
ENSG00000177548.13	chr16	-	2	4.71753	0.0343628	0.0902847
ENSG00000107372.13	chr9	-	2	4.68046	0.0350481	0.0919592
ENSG00000159842.15	chr17	-	5	2.67406	0.0351354	0.0920595
ENSG00000110811.20	chr12	+	2	4.67329	0.0351823	0.0920595
ENSG00000144596.13	chr3	-	2	4.66884	0.0352658	0.0921523
ENSG00000132669.14	chr20	+	4	2.9665	0.0356846	0.0931197
ENSG00000250159.7	chr5	-	2	4.64295	0.0357565	0.0931806
ENSG00000104872.11	chr19	-	2	4.63946	0.0358232	0.0932277
ENSG00000176946.12	chr2	-	2	4.63214	0.0359635	0.0934662
ENSG00000164713.10	chr7	+	3	3.46676	0.0362478	0.093982
ENSG00000142156.15	chr21	+	2	4.61677	0.03626	0.093982
ENSG00000198589.14	chr4	-	2	4.60178	0.0365517	0.0946103
ENSG00000135905.20	chr2	-	2	4.59609	0.0366633	0.0947711
ENSG00000114391.13	chr3	-	2	4.57811	0.0370177	0.0955585
ENSG00000147408.14	chr8	-	3	3.43861	0.0371949	0.0958867
ENSG00000049323.16	chr2	+	2	4.55147	0.0376426	0.0969107
ENSG00000101608.13	chr18	+	2	4.54649	0.0378787	0.0973878
ENSG00000163399.16	chr1	+	2	4.53215	0.0379407	0.0974168
ENSG00000102786.15	chr13	-	2	4.52864	0.0380122	0.0974698
ENSG00000100813.14	chr14	-	2	4.5221	0.038146	0.0976823
ENSG00000150630.4	chr4	-	2	4.4918	0.0387717	0.0991521
ENSG00000188554.15	chr17	+	2	4.45736	0.0394965	0.100871
ENSG00000101752.12	chr18	+	3	3.36939	0.0396345	0.101089
ENSG00000132530.17	chr17	+	2	4.44204	0.0399341	0.101688
ENSG00000065989.16	chr19	+	2	4.43497	0.0399756	0.101688
ENSG00000136205.17	chr7	-	3	3.32622	0.0412382	0.104686
ENSG00000224397.7	chr20	+	2	4.38192	0.0412631	0.104686
ENSG00000228300.14	chr19	+	2	4.3733	0.0413278	0.104712
ENSG00000173113.7	chr11	-	2	4.36878	0.0414288	0.104829
ENSG00000156011.17	chr8	-	3	3.31618	0.0416204	0.105175
ENSG00000123080.12	chr1	+	2	4.35102	0.0418285	0.105562
ENSG00000164708.6	chr7	-	2	4.34381	0.042052	0.105987
ENSG00000163412.13	chr3	-	2	4.33637	0.0421613	0.106006
ENSG00000150764.14	chr11	+	3	3.30191	0.0421704	0.106006
ENSG00000122986.14	chr12	-	2	4.33165	0.0422689	0.106115
ENSG00000162496.9	chr1	-	2	4.33106	0.0423428	0.106162
ENSG00000101557.15	chr18	+	2	4.32353	0.0424552	0.106304
ENSG00000196531.14	chr12	-	3	3.286	0.0427925	0.107009
ENSG00000159348.13	chr1	-	2	4.2965	0.0430814	0.107591
ENSG00000196526.10	chr4	-	2	4.29331	0.0431561	0.107638
ENSG00000072609.18	chr12	-	2	4.28903	0.0432563	0.107747
ENSG00000117114.20	chr1	+	3	3.26904	0.0434657	0.108129
ENSG00000109171.15	chr4	+	2	4.27769	0.0435231	0.108131
ENSG00000116584.20	chr1	-	2	4.22557	0.0447729	0.111093
ENSG00000105974.13	chr7	+	2	4.22238	0.0448505	0.111141
ENSG00000105711.13	chr19	+	2	4.22203	0.0449207	0.111172
ENSG00000131018.24	chr6	-	4	2.77513	0.0453273	0.112006
ENSG00000166292.12	chr17	-	2	4.20104	0.0453746	0.112006
ENSG00000159128.15	chr21	+	2	4.18704	0.0457217	0.112521
ENSG00000076108.12	chr12	-	2	4.18614	0.0457441	0.112521
ENSG00000154305.18	chr1	+	2	4.18502	0.045772	0.112521
ENSG00000145779.8	chr5	+	2	4.19728	0.0458181	0.112521
ENSG00000115414.21	chr2	-	5	2.50033	0.0461474	0.113185
ENSG00000205133.12	chr8	-	2	4.16511	0.0462714	0.113344
ENSG00000085563.15	chr7	-	2	4.1546	0.0465377	0.113851
ENSG00000148450.13	chr10	+	2	4.12998	0.0471674	0.115245
ENSG00000162909.18	chr1	+	2	4.1176	0.0474874	0.115879
ENSG00000145431.11	chr4	-	2	4.09967	0.0479555	0.116872
ENSG00000156030.13	chr14	-	2	4.08929	0.0482285	0.117258
ENSG00000243156.9	chr22	-	2	4.08901	0.0482359	0.117258
ENSG00000160014.17	chr19	+	2	4.05078	0.0492569	0.119588
ENSG00000108306.13	chr17	-	2	4.0432	0.0494621	0.119935
ENSG00000138061.12	chr2	-	2	4.0307	0.0498149	0.120638
ENSG00000156299.13	chr21	-	2	4.01964	0.0501057	0.121189
ENSG00000080189.15	chr20	-	2	4.01712	0.050175	0.121204
ENSG00000169155.10	chr9	+	2	4.01059	0.0503554	0.121486
ENSG00000118263.15	chr2	-	2	3.98202	0.0511525	0.123199
ENSG00000171425.10	chr19	+	2	3.98056	0.0511938	0.123199
ENSG00000168283.14	chr10	+	2	3.97626	0.0513151	0.123336
ENSG00000141540.11	chr17	+	2	3.94756	0.0521325	0.125144
ENSG00000178980.15	chr19	+	2	3.9422	0.0522941	0.125375
ENSG00000131697.18	chr1	-	2	3.93444	0.0525108	0.125738
ENSG00000114544.17	chr3	-	2	3.92591	0.0527586	0.12611
ENSG00000004799.8	chr7	-	3	3.06056	0.0527977	0.12611
ENSG00000112624.12	chr6	+	2	3.92067	0.0529114	0.126165
ENSG00000143420.19	chr1	-	2	3.91927	0.0529523	0.126165
ENSG00000197321.15	chr10	-	3	3.05166	0.0531244	0.126418
ENSG00000160209.19	chr21	+	3	3.05016	0.0531981	0.126436
ENSG00000186352.9	chr4	+	2	3.90438	0.0535623	0.127144
ENSG00000135447.17	chr12	-	2	3.85622	0.0548303	0.129993
ENSG00000145819.18	chr5	+	2	3.85367	0.0549076	0.130016
ENSG00000125618.18	chr2	-	2	3.85059	0.0550014	0.130077
ENSG00000130844.19	chr19	+	2	3.82155	0.0558938	0.132025
ENSG00000106608.17	chr7	-	2	3.81742	0.056022	0.132165
ENSG00000105993.15	chr7	+	2	3.80908	0.0562818	0.132615
ENSG00000182606.17	chr3	+	2	3.79209	0.0568154	0.133708
ENSG00000198959.12	chr20	-	2	3.7775	0.0572777	0.134631
ENSG00000179818.14	chr2	-	2	3.77473	0.0573662	0.134674
ENSG00000149115.14	chr11	-	3	2.95953	0.0578585	0.135663
ENSG00000070961.16	chr12	-	2	3.75413	0.0580272	0.135794
ENSG00000189308.11	chr4	-	2	3.7515	0.0581123	0.135794
ENSG00000189403.15	chr13	-	4	2.57597	0.0581267	0.135794
ENSG00000188312.14	chr9	+	2	3.74793	0.0582279	0.135865
ENSG00000124749.17	chr6	-	2	3.73876	0.0585259	0.136394
ENSG00000132005.9	chr19	-	2	3.73345	0.0586993	0.136633
ENSG00000084070.12	chr1	+	2	3.72427	0.0590005	0.137167
ENSG00000106823.12	chr9	-	2	3.71033	0.0594608	0.13807
ENSG00000138085.17	chr2	+	2	3.7012	0.0597646	0.138608
ENSG00000149187.18	chr11	-	2	3.68752	0.0602227	0.139501
ENSG00000131143.10	chr16	+	3	2.91308	0.0604142	0.139776
ENSG00000138835.22	chr9	+	6	2.17037	0.0605609	0.139947
ENSG00000076555.15	chr12	+	4	2.54159	0.0606745	0.140038
ENSG00000224861.1	chr14	-	2	3.67152	0.0607848	0.140038
ENSG00000147140.17	chrX	+	2	3.66988	0.0608193	0.140038
ENSG00000137074.20	chr9	-	2	3.66653	0.0609333	0.140132
ENSG00000106348.18	chr7	-	2	3.65725	0.0612502	0.140692
ENSG00000126226.22	chr13	-	2	3.65048	0.0614829	0.141058
ENSG00000066697.15	chr9	+	2	3.60014	0.0632421	0.14492
ENSG00000116675.16	chr1	+	2	3.59462	0.0634383	0.145059
ENSG00000170027.7	chr7	-	2	3.59418	0.0634539	0.145059
ENSG00000173511.10	chr11	+	2	3.58155	0.0639055	0.145918
ENSG00000101210.13	chr20	-	3	2.85008	0.0640996	0.146187
ENSG00000169813.16	chr10	-	3	2.84674	0.064249	0.146354
ENSG00000072195.15	chr2	+	4	2.49089	0.0646347	0.147057
ENSG00000060237.19	chr12	+	2	3.53463	0.0656144	0.149109
ENSG00000058668.15	chr1	+	2	3.51922	0.0661868	0.150232
ENSG00000132676.16	chr1	+	2	3.49658	0.0670373	0.151983
ENSG00000162458.13	chr1	+	2	3.48443	0.0674988	0.152849
ENSG00000198624.13	chr5	-	2	3.46008	0.0684343	0.154784
ENSG00000168237.18	chr3	+	2	3.45707	0.0685508	0.154865
ENSG00000196405.13	chr14	+	3	2.76951	0.0690397	0.155786
ENSG00000105227.16	chr19	-	2	3.4367	0.0693457	0.156133
ENSG00000166317.12	chr10	-	2	3.43643	0.0693561	0.156133
ENSG00000175832.13	chr17	-	2	3.41379	0.070252	0.157819
ENSG00000162595.7	chr1	-	2	3.42318	0.0702698	0.157819
ENSG00000124422.12	chr17	-	2	3.4032	0.0706753	0.158544
ENSG00000113578.18	chr5	-	2	3.3909	0.0711704	0.159468
ENSG00000091436.17	chr2	+	3	2.7338	0.071377	0.159744
ENSG00000134758.14	chr18	+	2	3.36721	0.0721351	0.161041
ENSG00000022267.19	chrX	+	5	2.20803	0.0721642	0.161041
ENSG00000141552.18	chr17	+	2	3.36543	0.072208	0.161041
ENSG00000105483.18	chr19	-	2	3.36292	0.0723111	0.161083
ENSG00000166444.19	chr11	-	3	2.71787	0.0724459	0.161196
ENSG00000165458.14	chr11	+	2	3.33746	0.0733666	0.162925
ENSG00000077150.20	chr10	+	2	3.33716	0.0733927	0.162925
ENSG00000119699.8	chr14	-	2	3.33228	0.0735833	0.163159
ENSG00000172889.16	chr9	+	3	2.69994	0.0736682	0.163159
ENSG00000175449.14	chr5	+	2	3.32071	0.0740703	0.163705
ENSG00000110871.15	chr12	-	2	3.32036	0.0740853	0.163705
ENSG00000164591.14	chr5	+	2	3.30726	0.0746407	0.164553
ENSG00000124831.19	chr2	+	3	2.68589	0.074641	0.164553
ENSG00000105223.20	chr19	+	3	2.66907	0.0758227	0.166967
ENSG00000164116.17	chr4	+	2	3.2731	0.0761117	0.167411
ENSG00000184601.11	chr14	+	2	3.26145	0.0766206	0.168223
ENSG00000157985.19	chr2	+	2	3.26063	0.0766564	0.168223
ENSG00000066629.18	chr14	+	2	3.25387	0.0769538	0.168559
ENSG00000115310.18	chr2	-	3	2.65279	0.0769853	0.168559
ENSG00000162616.9	chr1	+	2	3.24821	0.0772036	0.168844
ENSG00000219626.9	chr2	+	2	3.24593	0.0773045	0.168872
ENSG00000161955.16	chr17	+	2	3.22799	0.0781034	0.170424
ENSG00000223695.1	chr22	+	2	3.22125	0.0784059	0.170889
ENSG00000225733.6	chr3	-	2	3.21646	0.0786215	0.170975
ENSG00000169925.17	chr9	-	2	3.21641	0.0786237	0.170975
ENSG00000166532.16	chr12	+	2	3.20565	0.0791108	0.17184
ENSG00000138640.15	chr4	-	2	3.2025	0.0792542	0.171956
ENSG00000198517.10	chr7	+	2	3.19395	0.0796444	0.172608
ENSG00000182667.14	chr11	+	2	3.1859	0.0800138	0.17314
ENSG00000068305.17	chr15	+	2	3.18467	0.0800705	0.17314
ENSG00000239523.6	chr3	+	2	3.17965	0.0803021	0.173445
ENSG00000042753.12	chr19	-	2	3.17726	0.0804122	0.173488
ENSG00000100664.11	chr14	+	2	3.17059	0.0807216	0.173802
ENSG00000113448.19	chr5	-	2	3.17173	0.0807392	0.173802
ENSG00000110911.17	chr12	-	2	3.16669	0.0809029	0.173959
ENSG00000115935.18	chr2	-	3	2.59607	0.0811796	0.174359
ENSG00000186020.13	chr19	-	2	3.15501	0.0814488	0.174741
ENSG00000113645.15	chr5	+	2	3.1519	0.0815947	0.174859
ENSG00000084674.15	chr2	-	2	3.14252	0.0820372	0.175611
ENSG00000010256.11	chr3	-	2	3.13805	0.0823196	0.175899
ENSG00000204256.14	chr6	+	3	2.58052	0.0823697	0.175899
ENSG00000181666.18	chr19	+	2	3.13388	0.0824468	0.175899
ENSG00000196440.11	chrX	+	2	3.11943	0.0831375	0.177012
ENSG00000179348.12	chr3	-	2	3.11866	0.0831869	0.177012
ENSG00000133313.15	chr18	+	2	3.11664	0.0832715	0.177012
ENSG00000173960.14	chr2	+	2	3.11526	0.0833378	0.177012
ENSG00000130779.22	chr12	-	2	3.10668	0.0837519	0.177695
ENSG00000161513.12	chr17	-	2	3.10129	0.0840133	0.177969
ENSG00000124440.16	chr19	+	3	2.55875	0.0840668	0.177969
ENSG00000074266.22	chr11	+	2	3.09378	0.0843788	0.178433
ENSG00000182177.14	chr2	-	2	3.0908	0.0845243	0.178544
ENSG00000102781.14	chr13	-	2	3.08627	0.0847458	0.178815
ENSG00000142546.14	chr19	-	2	3.08335	0.0848896	0.178815
ENSG00000141068.14	chr17	+	2	3.08247	0.0849326	0.178815
ENSG00000181894.15	chr19	-	2	3.07871	0.0851178	0.17893
ENSG00000197971.16	chr18	-	3	2.54479	0.0851734	0.17893
ENSG00000065802.12	chr2	+	2	3.05919	0.086109	0.180697
ENSG00000105576.15	chr19	-	3	2.52709	0.0865985	0.181378
ENSG00000131711.15	chr5	+	2	3.04846	0.0866226	0.181378
ENSG00000197905.10	chr12	+	2	3.04413	0.0868403	0.181635
ENSG00000156802.13	chr8	-	2	3.03801	0.0871497	0.182084
ENSG00000147862.17	chr9	-	2	3.02716	0.0877004	0.183035
ENSG00000013563.14	chrX	-	2	3.01232	0.0884596	0.184419
ENSG00000140382.15	chr15	+	2	2.98705	0.0897702	0.186948
ENSG00000167641.11	chr19	-	2	2.97817	0.0903075	0.187863
ENSG00000071127.17	chr4	-	3	2.48017	0.0904953	0.18805
ENSG00000184489.13	chr8	+	4	2.21586	0.0910186	0.188932
ENSG00000146701.12	chr7	+	2	2.95704	0.0913542	0.189424
ENSG00000103496.15	chr16	+	2	2.93666	0.0924719	0.191535
ENSG00000170345.10	chr14	+	2	2.93748	0.092812	0.192032
ENSG00000143322.21	chr1	-	2	2.93167	0.0930379	0.192292
ENSG00000166483.12	chr11	+	2	2.91421	0.0936865	0.193424
ENSG00000105568.18	chr19	+	2	2.91168	0.0938085	0.193467
ENSG00000196507.11	chrX	+	2	2.90787	0.0940183	0.193692
ENSG00000163882.9	chr3	+	2	2.90373	0.0942464	0.193953
ENSG00000114439.19	chr3	+	2	2.89815	0.0945548	0.194262
ENSG00000128487.18	chr17	+	2	2.89736	0.0945987	0.194262
ENSG00000171604.12	chr5	+	2	2.88936	0.0950435	0.194966
ENSG00000005238.20	chr9	-	2	2.88454	0.0953123	0.195309
ENSG00000163947.12	chr3	-	3	2.42254	0.0955282	0.195542
ENSG00000141127.15	chr17	+	2	2.87795	0.0956817	0.195648
ENSG00000073910.23	chr13	+	5	2.01737	0.0961863	0.196217
ENSG00000197694.18	chr9	+	2	2.86832	0.0962237	0.196217
ENSG00000152061.23	chr1	+	3	2.41435	0.0962669	0.196217
ENSG00000205090.9	chr1	-	2	2.86303	0.0965232	0.19653
ENSG00000154710.18	chr7	+	2	2.8607	0.0966602	0.196601
ENSG00000173221.14	chr5	-	2	2.85475	0.0969939	0.19707
ENSG00000184939.16	chr16	+	2	2.8523	0.0971335	0.197145
ENSG00000159592.11	chr1	-	3	2.39528	0.0980091	0.198712
ENSG00000101639.18	chr18	+	2	2.82917	0.0984643	0.199424
ENSG00000185825.17	chrX	-	2	2.82481	0.098718	0.199648
ENSG00000110492.16	chr11	+	2	2.82369	0.0987831	0.199648
ENSG00000137843.12	chr15	+	2	2.81842	0.0990899	0.200019
ENSG00000126001.16	chr20	+	2	2.81696	0.0991753	0.200019
ENSG00000203485.14	chr14	+	2	2.80948	0.0996133	0.200692
ENSG00000139323.14	chr12	-	2	2.77358	0.101748	0.20471
ENSG00000036672.16	chr11	-	4	2.12546	0.101821	0.20471
ENSG00000104325.7	chr8	+	2	2.7691	0.102017	0.204889
ENSG00000095066.12	chr19	-	3	2.34136	0.103111	0.206698
ENSG00000153094.24	chr2	+	2	2.74795	0.103302	0.206698
ENSG00000160111.14	chr19	-	2	2.74788	0.103306	0.206698
ENSG00000166068.13	chr15	+	2	2.74719	0.103349	0.206698
ENSG00000134326.12	chr2	-	2	2.74306	0.103674	0.207133
ENSG00000187498.16	chr13	-	2	2.7356	0.104061	0.207689
ENSG00000145730.20	chr5	+	6	1.86084	0.10476	0.208804
ENSG00000173402.12	chr3	+	2	2.72306	0.104837	0.208804
ENSG00000153487.13	chr13	+	2	2.719	0.105091	0.209091
ENSG00000141759.15	chr18	-	2	2.69179	0.106804	0.21207
ENSG00000106052.13	chr7	+	2	2.69171	0.106809	0.21207
ENSG00000177354.12	chr10	+	2	2.6889	0.107036	0.212302
ENSG00000151474.23	chr10	-	2	2.68403	0.107298	0.2126
ENSG00000017797.13	chr18	+	2	2.66807	0.108322	0.214409
ENSG00000134982.17	chr5	+	2	2.64015	0.110142	0.217631
ENSG00000077157.22	chr1	+	2	2.63961	0.110177	0.217631
ENSG00000170365.10	chr4	+	2	2.63628	0.110396	0.217839
ENSG00000172845.17	chr2	-	3	2.26297	0.11102	0.218846
ENSG00000101246.20	chr20	-	2	2.62468	0.111164	0.218904
ENSG00000082293.13	chr6	+	2	2.62083	0.11142	0.219041
ENSG00000082438.18	chr2	-	2	2.62005	0.111473	0.219041
ENSG00000116871.15	chr1	+	2	2.61849	0.111576	0.219041
ENSG00000072210.19	chr17	+	2	2.61521	0.111796	0.219248
ENSG00000197879.17	chr17	-	3	2.25323	0.112046	0.219514
ENSG00000095794.19	chr10	+	3	2.24609	0.112846	0.220855
ENSG00000127824.14	chr2	-	2	2.57691	0.114391	0.223651
ENSG00000178031.18	chr9	+	2	2.57056	0.114827	0.224276
ENSG00000148700.15	chr10	+	3	2.22444	0.115134	0.224645
ENSG00000049618.24	chr6	+	2	2.55609	0.11583	0.225774
ENSG00000124313.18	chrX	-	2	2.55093	0.11619	0.226246
ENSG00000095637.22	chr10	-	2	2.54789	0.116402	0.22643
ENSG00000047849.21	chr3	-	4	2.0159	0.11661	0.226605
ENSG00000007237.19	chr17	-	4	2.01485	0.116806	0.226755
ENSG00000106018.14	chr7	-	2	2.53952	0.116991	0.226884
ENSG00000148219.18	chr9	-	2	2.53833	0.117165	0.226992
ENSG00000125733.18	chr19	+	2	2.5245	0.118053	0.228482
ENSG00000140859.16	chr16	-	2	2.52198	0.118233	0.228599
ENSG00000122359.18	chr10	-	2	2.48854	0.120643	0.233025
ENSG00000143401.15	chr1	-	2	2.48296	0.121051	0.233578
ENSG00000128585.18	chr7	+	2	2.47307	0.121778	0.234744
ENSG00000109846.9	chr11	-	4	1.97759	0.122262	0.235439
ENSG00000214530.10	chr11	-	2	2.46269	0.122545	0.235749
ENSG00000204922.5	chr11	+	2	2.45819	0.12288	0.236156
ENSG00000106246.18	chr7	-	2	2.4527	0.12329	0.236707
ENSG00000169499.15	chr8	+	2	2.4495	0.123529	0.236928
ENSG00000115998.8	chr2	-	2	2.44533	0.123842	0.237291
ENSG00000187091.14	chr3	-	2	2.44179	0.124108	0.237564
ENSG00000182903.16	chr4	-	2	2.42417	0.125443	0.239741
ENSG00000177963.14	chr11	+	2	2.42348	0.125495	0.239741
ENSG00000172819.17	chr12	-	3	2.11617	0.12755	0.243423
ENSG00000181722.17	chr3	-	3	2.11333	0.127893	0.243835
ENSG00000204954.10	chr12	-	2	2.38575	0.128411	0.244581
ENSG00000134371.14	chr1	+	2	2.38061	0.128815	0.245106
ENSG00000160691.19	chr1	-	2	2.36771	0.129848	0.246827
ENSG00000179222.18	chrX	+	2	2.36027	0.130425	0.247677
ENSG00000203709.12	chr1	-	2	2.35428	0.130902	0.247712
ENSG00000166963.13	chr15	+	2	2.35411	0.130916	0.247712
ENSG00000203739.4	chr1	-	2	2.35328	0.130983	0.247712
ENSG00000107959.17	chr10	-	2	2.35137	0.131136	0.247712
ENSG00000136153.20	chr13	+	3	2.0864	0.131198	0.247712
ENSG00000079999.14	chr19	-	2	2.35035	0.131217	0.247712
ENSG00000110047.18	chr11	-	2	2.34691	0.131681	0.248342
ENSG00000115904.14	chr2	-	2	2.33532	0.13243	0.24951
ENSG00000198521.12	chr19	-	2	2.33286	0.13263	0.249541
ENSG00000130695.16	chr1	+	2	2.33192	0.132707	0.249541
ENSG00000089225.20	chr12	-	4	1.90533	0.133659	0.251086
ENSG00000075292.19	chr2	+	2	2.31578	0.134026	0.251529
ENSG00000087008.16	chr4	-	2	2.31007	0.134496	0.252034
ENSG00000105514.8	chr19	-	2	2.30932	0.134558	0.252034
ENSG00000139117.14	chr12	-	2	2.30607	0.134827	0.252291
ENSG00000143549.21	chr1	-	3	2.05159	0.13576	0.253789
ENSG00000178127.13	chr18	+	3	2.04877	0.135965	0.253925
ENSG00000136237.19	chr7	-	2	2.28908	0.136243	0.254087
ENSG00000182534.13	chr17	-	3	2.04605	0.136317	0.254087
ENSG00000161203.13	chr3	+	2	2.27938	0.137058	0.255221
ENSG00000072682.20	chr5	-	2	2.27418	0.137498	0.255791
ENSG00000119927.14	chr10	-	2	2.27216	0.137859	0.256215
ENSG00000155755.19	chr2	-	2	2.25826	0.138854	0.257814
ENSG00000067057.18	chr10	+	4	1.8718	0.139292	0.258377
ENSG00000128918.15	chr15	-	3	2.01577	0.140402	0.260185
ENSG00000137168.8	chr6	-	2	2.23789	0.140611	0.260321
ENSG00000185022.12	chr22	+	2	2.22354	0.142277	0.262674
ENSG00000110422.12	chr11	+	2	2.21867	0.142293	0.262674
ENSG00000117707.16	chr1	+	3	2.00085	0.142293	0.262674
ENSG00000273899.5	chr22	+	2	2.2171	0.142431	0.262676
ENSG00000133121.21	chr13	-	3	1.99005	0.143761	0.264874
ENSG00000139112.11	chr12	+	3	1.98757	0.144099	0.265242
ENSG00000127022.16	chr5	+	2	2.18906	0.144929	0.266339
ENSG00000168003.18	chr11	+	2	2.18857	0.144973	0.266339
ENSG00000106333.13	chr7	+	3	1.96697	0.146949	0.269712
ENSG00000168646.13	chr17	-	2	2.15328	0.14819	0.271729
ENSG00000136715.19	chr2	-	2	2.11438	0.151832	0.278141
ENSG00000126217.21	chr13	+	2	2.11042	0.152209	0.278565
ENSG00000063244.13	chr19	+	2	2.10807	0.152433	0.27871
ENSG00000259498.1	chr15	-	2	2.10472	0.152753	0.279029
ENSG00000240583.14	chr7	+	3	1.9238	0.153109	0.279375
ENSG00000176834.14	chr12	-	2	2.0997	0.153234	0.279375
ENSG00000072818.12	chr17	+	2	2.07914	0.155222	0.282732
ENSG00000163520.14	chr3	+	2	2.07149	0.156042	0.283852
ENSG00000079102.16	chr8	-	2	2.06954	0.156161	0.283852
ENSG00000115159.16	chr2	+	2	2.06829	0.156283	0.283852
ENSG00000269113.4	chr1	-	2	2.06681	0.15643	0.283852
ENSG00000178607.17	chr17	-	2	2.06068	0.157158	0.284905
ENSG00000023191.17	chr11	-	3	1.89468	0.157412	0.285096
ENSG00000162819.12	chr1	+	2	2.05531	0.157564	0.285102
ENSG00000048052.23	chr7	+	4	1.76908	0.158021	0.28566
ENSG00000260549.2	chr16	+	2	2.04478	0.158612	0.286458
ENSG00000112759.19	chr6	+	4	1.76391	0.159025	0.286934
ENSG00000076864.19	chr1	-	2	2.03848	0.159244	0.287058
ENSG00000119640.9	chr14	-	2	2.03681	0.159411	0.28709
ENSG00000133678.14	chr10	+	2	2.03414	0.15968	0.287304
ENSG00000010803.16	chr1	-	2	2.03079	0.160018	0.287642
ENSG00000134897.14	chr13	+	2	2.02102	0.161008	0.289151
ENSG00000150093.20	chr10	-	2	2.00757	0.162382	0.291345
ENSG00000107262.26	chr9	-	2	1.99384	0.163799	0.293613
ENSG00000144711.16	chr3	-	3	1.85062	0.164163	0.293692
ENSG00000133943.21	chr14	+	2	1.98901	0.164301	0.293692
ENSG00000155096.14	chr8	-	2	1.989	0.164302	0.293692
ENSG00000176046.9	chr16	-	2	1.98478	0.164743	0.293953
ENSG00000160194.18	chr21	+	2	1.9844	0.164782	0.293953
ENSG00000196923.14	chr5	-	2	1.9832	0.164908	0.293953
ENSG00000071242.12	chr6	-	2	1.97975	0.165269	0.294323
ENSG00000166206.15	chr15	-	2	1.97555	0.16571	0.294835
ENSG00000110446.12	chr11	-	2	1.95599	0.167782	0.29804
ENSG00000180035.13	chr16	+	2	1.95561	0.167822	0.29804
ENSG00000105373.19	chr19	+	3	1.81204	0.170317	0.302191
ENSG00000144118.14	chr2	+	2	1.92403	0.171234	0.303537
ENSG00000189350.13	chr2	+	2	1.91665	0.172043	0.304689
ENSG00000004059.11	chr7	+	2	1.90901	0.172885	0.305898
ENSG00000130304.17	chr19	+	2	1.90281	0.173571	0.3068
ENSG00000116922.14	chr1	-	2	1.90139	0.173729	0.3068
ENSG00000176209.12	chr8	+	2	1.90008	0.173875	0.3068
ENSG00000138757.15	chr4	-	2	1.89482	0.174461	0.307552
ENSG00000236714.3	chr5	+	2	1.89355	0.174674	0.307644
ENSG00000155366.17	chr1	-	2	1.88687	0.175352	0.308555
ENSG00000147573.17	chr8	+	2	1.88278	0.175813	0.309083
ENSG00000196502.12	chr16	-	2	1.87883	0.176259	0.309194
ENSG00000213853.10	chr16	-	2	1.87873	0.17627	0.309194
ENSG00000173171.15	chr1	+	2	1.87793	0.176361	0.309194
ENSG00000003402.20	chr2	+	4	1.67857	0.176521	0.309194
ENSG00000244274.8	chr20	+	3	1.7731	0.176829	0.30945
ENSG00000089693.11	chr12	-	4	1.67072	0.178221	0.311603
ENSG00000157873.18	chr1	+	2	1.85983	0.178423	0.311671
ENSG00000068028.17	chr3	-	2	1.85252	0.179264	0.312604
ENSG00000153048.11	chr16	-	2	1.85236	0.179283	0.312604
ENSG00000166484.20	chr17	+	2	1.84328	0.180334	0.314152
ENSG00000170892.13	chr19	+	2	1.83509	0.181289	0.315528
ENSG00000122550.18	chr7	+	2	1.826	0.182355	0.317097
ENSG00000165795.23	chr14	-	3	1.73623	0.183111	0.318122
ENSG00000180628.15	chr10	+	2	1.80343	0.185035	0.321067
ENSG00000265107.3	chr1	-	2	1.80588	0.185141	0.321067
ENSG00000105321.14	chr19	+	2	1.79847	0.185631	0.32135
ENSG00000246273.8	chr11	+	2	1.7984	0.185639	0.32135
ENSG00000162433.15	chr1	+	3	1.71589	0.186707	0.322906
ENSG00000081189.16	chr5	-	2	1.78553	0.187195	0.323246
ENSG00000286054.1	chr21	+	2	1.78646	0.187261	0.323246
ENSG00000168395.16	chr2	+	2	1.78377	0.187408	0.323246
ENSG00000012171.20	chr3	+	2	1.7819	0.187645	0.323364
ENSG00000185973.12	chrX	-	2	1.77768	0.188151	0.323945
ENSG00000110237.5	chr11	+	2	1.77543	0.188427	0.324128
ENSG00000101972.19	chrX	+	2	1.77111	0.188956	0.324399
ENSG00000154978.13	chr7	-	2	1.77005	0.189086	0.324399
ENSG00000096696.14	chr6	+	2	1.76945	0.189161	0.324399
ENSG00000127863.16	chr13	+	2	1.76863	0.189261	0.324399
ENSG00000173272.16	chr2	-	2	1.75828	0.19054	0.326299
ENSG00000184009.13	chr17	-	2	1.75464	0.191106	0.326977
ENSG00000196465.10	chr12	+	2	1.74451	0.192258	0.328654
ENSG00000171714.12	chr11	+	2	1.73857	0.193003	0.329635
ENSG00000175274.19	chr11	-	2	1.7338	0.193605	0.330369
ENSG00000156113.24	chr10	-	2	1.73131	0.193921	0.330614
ENSG00000080546.13	chr6	-	2	1.72597	0.194599	0.331309
ENSG00000170175.11	chr17	+	3	1.67224	0.194674	0.331309
ENSG00000224051.7	chr1	+	2	1.7227	0.195015	0.331434
ENSG00000010278.15	chr12	+	2	1.72209	0.195094	0.331434
ENSG00000048707.15	chr1	+	2	1.71999	0.195362	0.331597
ENSG00000149823.9	chr11	+	2	1.71295	0.196264	0.332832
ENSG00000115053.17	chr2	-	3	1.65872	0.197276	0.334254
ENSG00000173486.14	chr11	+	2	1.70255	0.197606	0.334518
ENSG00000059145.19	chr16	-	2	1.69741	0.198273	0.335351
ENSG00000205220.12	chr16	-	2	1.68391	0.200039	0.337928
ENSG00000135077.9	chr5	-	3	1.64248	0.200305	0.337928
ENSG00000127084.19	chr9	+	2	1.68174	0.200325	0.337928
ENSG00000100266.19	chr22	-	2	1.67483	0.201238	0.339168
ENSG00000151150.22	chr10	-	4	1.56974	0.201529	0.339341
ENSG00000171492.14	chr1	+	2	1.67139	0.201694	0.339341
ENSG00000242282.6	chr2	-	2	1.66954	0.201939	0.339457
ENSG00000250722.6	chr5	-	2	1.66508	0.202534	0.339907
ENSG00000179526.17	chr8	-	3	1.63079	0.202562	0.339907
ENSG00000277443.3	chr6	+	2	1.6491	0.204684	0.343167
ENSG00000242259.9	chr22	-	2	1.64699	0.204967	0.343341
ENSG00000187514.17	chr2	+	2	1.64452	0.205301	0.343601
ENSG00000175538.11	chr11	-	2	1.63374	0.20677	0.34553
ENSG00000115963.14	chr2	-	2	1.63476	0.206814	0.34553
ENSG00000037241.7	chr5	+	2	1.6306	0.207201	0.345876
ENSG00000175287.19	chr9	+	2	1.62702	0.207692	0.346394
ENSG00000128739.23	chr15	+	3	1.59939	0.208756	0.347866
ENSG00000081870.12	chr1	-	2	1.61555	0.209278	0.347956
ENSG00000213145.10	chr14	+	2	1.61506	0.209354	0.347956
ENSG00000008710.20	chr16	-	2	1.61353	0.209558	0.347956
ENSG00000129009.13	chr15	+	2	1.61345	0.209569	0.347956
ENSG00000134686.18	chr1	-	2	1.61239	0.209717	0.347956
ENSG00000162241.12	chr11	-	2	1.60666	0.210517	0.348981
ENSG00000103852.13	chr15	-	2	1.59732	0.211827	0.35085
ENSG00000182796.14	chr12	+	2	1.59177	0.212612	0.351845
ENSG00000105438.9	chr19	-	2	1.58126	0.214106	0.354013
ENSG00000081377.17	chr9	-	2	1.57563	0.214911	0.355038
ENSG00000188522.15	chr17	-	2	1.57488	0.215136	0.355104
ENSG00000064932.16	chr19	-	3	1.56628	0.215553	0.355486
ENSG00000120899.18	chr8	+	2	1.56544	0.216379	0.356542
ENSG00000164091.12	chr3	-	2	1.56374	0.216624	0.35664
ENSG00000179988.15	chr10	+	2	1.55623	0.217715	0.358129
ENSG00000116857.17	chr1	-	2	1.54948	0.218702	0.359444
ENSG00000116171.19	chr1	+	2	1.54436	0.219454	0.360076
ENSG00000121361.5	chr12	-	2	1.5443	0.219462	0.360076
ENSG00000064042.18	chr4	+	3	1.54516	0.219914	0.360509
ENSG00000075391.17	chr1	+	2	1.53818	0.220365	0.360939
ENSG00000163697.17	chr4	-	3	1.54003	0.221001	0.361673
ENSG00000127472.11	chr1	+	2	1.5313	0.221448	0.362095
ENSG00000058262.10	chr3	+	2	1.52112	0.222905	0.364167
ENSG00000088899.15	chr20	-	2	1.51776	0.223411	0.364682
ENSG00000100888.15	chr14	-	2	1.51014	0.224559	0.366245
ENSG00000169926.11	chr15	+	2	1.50826	0.224844	0.366399
ENSG00000165410.15	chr14	-	2	1.50514	0.2254	0.366993
ENSG00000151135.10	chr12	+	2	1.49947	0.226181	0.367952
ENSG00000117984.15	chr11	-	2	1.49346	0.227102	0.369137
ENSG00000064225.12	chr3	+	2	1.48904	0.22778	0.369926
ENSG00000104763.20	chr8	-	7	1.37265	0.22836	0.370553
ENSG00000172831.14	chr16	+	2	1.48176	0.228905	0.371124
ENSG00000145675.15	chr5	+	5	1.42563	0.229507	0.371545
ENSG00000183010.17	chr17	-	2	1.47759	0.229552	0.371545
ENSG00000175029.17	chr10	-	2	1.47134	0.230527	0.372654
ENSG00000129422.14	chr8	-	3	1.49569	0.230626	0.372654
ENSG00000047315.17	chr4	+	2	1.46162	0.232052	0.374642
ENSG00000166913.13	chr20	+	2	1.45191	0.233589	0.376421
ENSG00000223969.6	chr7	-	2	1.45043	0.233823	0.376421
ENSG00000100242.15	chr22	-	3	1.48087	0.233938	0.376421
ENSG00000115641.19	chr2	-	3	1.48223	0.233939	0.376421
ENSG00000168883.20	chr2	+	2	1.44528	0.234645	0.377049
ENSG00000130811.12	chr19	-	2	1.44479	0.234722	0.377049
ENSG00000188549.12	chr15	-	2	1.44269	0.235058	0.377273
ENSG00000130054.5	chrX	+	2	1.4403	0.235441	0.377572
ENSG00000053918.18	chr11	+	2	1.42849	0.237345	0.380307
ENSG00000163072.16	chr2	+	2	1.41108	0.240186	0.384539
ENSG00000166348.19	chr10	-	2	1.40872	0.240575	0.384571
ENSG00000110031.13	chr11	-	2	1.40796	0.240715	0.384571
ENSG00000104976.12	chr19	+	2	1.40731	0.240808	0.384571
ENSG00000139160.13	chr12	+	2	1.40575	0.241066	0.384662
ENSG00000249464.6	chr4	+	2	1.39665	0.242574	0.386669
ENSG00000181830.9	chr11	+	2	1.39573	0.242727	0.386669
ENSG00000164953.16	chr8	+	2	1.39191	0.243365	0.387365
ENSG00000182809.11	chr14	+	3	1.42832	0.246083	0.391366
ENSG00000136895.19	chr9	+	2	1.368	0.247402	0.393137
ENSG00000050820.17	chr16	-	3	1.4221	0.247615	0.393151
ENSG00000156508.19	chr6	-	3	1.42025	0.248005	0.393444
ENSG00000171877.21	chr15	-	2	1.35784	0.249142	0.394922
ENSG00000134369.15	chr1	+	2	1.35444	0.249728	0.395523
ENSG00000121933.19	chr1	-	3	1.40735	0.251167	0.397188
ENSG00000178188.14	chr16	+	2	1.34599	0.251193	0.397188
ENSG00000251562.8	chr11	+	2	1.34037	0.252172	0.398407
ENSG00000131828.14	chrX	+	2	1.33753	0.25267	0.398865
ENSG00000204310.13	chr6	-	2	1.32938	0.254103	0.400797
ENSG00000168542.16	chr2	+	2	1.32888	0.254549	0.401171
ENSG00000160801.14	chr3	+	2	1.32565	0.254762	0.401176
ENSG00000107104.20	chr9	+	2	1.31822	0.256081	0.402923
ENSG00000123600.20	chr2	-	2	1.31243	0.257115	0.404219
ENSG00000186635.15	chr11	-	3	1.37774	0.258384	0.405881
ENSG00000137764.20	chr15	+	2	1.30057	0.259287	0.406966
ENSG00000168916.15	chr5	-	3	1.37052	0.260191	0.40761
ENSG00000158747.15	chr1	+	2	1.29477	0.260301	0.40761
ENSG00000215252.11	chr15	-	2	1.29459	0.260335	0.40761
ENSG00000130940.15	chr1	-	2	1.293	0.260623	0.407728
ENSG00000134243.12	chr1	-	3	1.36257	0.262193	0.409694
ENSG00000163798.13	chr2	+	2	1.2833	0.262398	0.409694
ENSG00000269313.5	chrX	+	2	1.28263	0.26252	0.409694
ENSG00000177380.14	chr19	+	2	1.27963	0.263073	0.410223
ENSG00000106565.18	chr7	-	2	1.27724	0.263514	0.410577
ENSG00000108679.13	chr17	-	2	1.26276	0.266207	0.414435
ENSG00000075413.19	chr14	+	2	1.25856	0.266993	0.415323
ENSG00000114867.22	chr3	+	3	1.34223	0.267394	0.415564
ENSG00000111640.15	chr12	+	3	1.34163	0.2676	0.415564
ENSG00000175182.15	chr3	+	2	1.25314	0.268014	0.415564
ENSG00000159131.17	chr21	-	2	1.25313	0.268015	0.415564
ENSG00000164733.22	chr8	-	3	1.33907	0.268385	0.415802
ENSG00000249307.7	chr4	+	2	1.24438	0.269674	0.417462
ENSG00000178149.17	chr3	-	2	1.23549	0.271371	0.41975
ENSG00000130529.16	chr19	+	2	1.23381	0.271694	0.419911
ENSG00000133878.9	chr8	-	2	1.23154	0.27213	0.419943
ENSG00000104881.16	chr19	-	2	1.23142	0.272153	0.419943
ENSG00000114738.11	chr3	+	2	1.22715	0.272977	0.420595
ENSG00000177000.13	chr1	-	4	1.31754	0.273014	0.420595
ENSG00000106211.10	chr7	+	2	1.2206	0.274245	0.421951
ENSG00000046653.15	chrX	-	2	1.22015	0.274334	0.421951
ENSG00000113575.10	chr5	-	2	1.21663	0.275018	0.422664
ENSG00000014216.16	chr11	+	2	1.2131	0.275709	0.423315
ENSG00000094916.16	chr12	-	2	1.21221	0.275883	0.423315
ENSG00000132646.11	chr20	-	2	1.20402	0.277492	0.425443
ENSG00000134201.12	chr1	+	2	1.20226	0.277841	0.425638
ENSG00000141562.18	chr17	+	2	1.20061	0.278167	0.425798
ENSG00000105323.17	chr19	+	2	1.1985	0.278584	0.426096
ENSG00000075420.13	chr3	+	2	1.19499	0.279281	0.426821
ENSG00000135821.19	chr1	-	2	1.19351	0.279576	0.426932
ENSG00000168824.14	chr4	+	2	1.19268	0.279808	0.426947
ENSG00000177098.9	chr11	-	2	1.1883	0.280676	0.427385
ENSG00000110665.12	chr11	-	2	1.18864	0.280707	0.427385
ENSG00000126883.17	chr9	+	2	1.18634	0.281009	0.427385
ENSG00000118596.12	chr12	+	2	1.1865	0.281086	0.427385
ENSG00000162670.11	chr1	-	2	1.18534	0.281209	0.427385
ENSG00000167685.15	chr19	+	2	1.18148	0.281987	0.428227
ENSG00000128789.21	chr18	+	2	1.17544	0.283205	0.429737
ENSG00000166313.19	chr11	-	2	1.16453	0.285426	0.432765
ENSG00000170871.12	chr4	+	2	1.158	0.286768	0.434455
ENSG00000077092.19	chr3	+	2	1.1479	0.288857	0.437275
ENSG00000204217.15	chr2	+	2	1.14177	0.290134	0.438742
ENSG00000103043.15	chr16	-	2	1.14105	0.290284	0.438742
ENSG00000129116.19	chr4	+	3	1.25647	0.290512	0.438742
ENSG00000204520.14	chr6	+	2	1.13828	0.290993	0.439122
ENSG00000146592.17	chr7	+	2	1.13442	0.291784	0.439787
ENSG00000166272.18	chr10	+	2	1.13339	0.291892	0.439787
ENSG00000048740.18	chr10	+	3	1.24467	0.293849	0.442388
ENSG00000132153.15	chr3	+	2	1.11901	0.294942	0.443405
ENSG00000131149.19	chr16	+	2	1.1188	0.294987	0.443405
ENSG00000122367.20	chr10	+	2	1.11373	0.296072	0.444308
ENSG00000108946.15	chr17	+	4	1.24906	0.296252	0.444308
ENSG00000137962.13	chr1	-	2	1.11275	0.296282	0.444308
ENSG00000268858.2	chr20	-	2	1.10919	0.297048	0.444898
ENSG00000123143.13	chr19	+	2	1.10782	0.297343	0.444898
ENSG00000127914.19	chr7	+	2	1.10769	0.297372	0.444898
ENSG00000119333.12	chr9	-	2	1.10242	0.298511	0.445774
ENSG00000061938.20	chr3	-	2	1.10293	0.298594	0.445774
ENSG00000250608.2	chr3	-	2	1.10176	0.298655	0.445774
ENSG00000219607.4	chr6	+	2	1.09484	0.300162	0.447676
ENSG00000067064.12	chr10	-	2	1.09176	0.300847	0.448349
ENSG00000104635.15	chr8	+	2	1.08834	0.301586	0.449102
ENSG00000169398.19	chr8	-	2	1.0786	0.303738	0.451923
ENSG00000077684.16	chr4	+	2	1.07759	0.303961	0.451923
ENSG00000073578.17	chr5	+	3	1.20898	0.304188	0.451923
ENSG00000151247.13	chr4	-	2	1.07269	0.305053	0.452665
ENSG00000134769.22	chr18	+	3	1.20586	0.30516	0.452665
ENSG00000196576.16	chr22	-	2	1.07087	0.305459	0.45276
ENSG00000169375.16	chr15	-	2	1.05841	0.308262	0.45656
ENSG00000171680.23	chr1	-	2	1.05649	0.308698	0.456854
ENSG00000172824.16	chr16	+	2	1.04804	0.310621	0.459346
ENSG00000076944.16	chr19	+	2	1.04659	0.311009	0.459565
ENSG00000115468.12	chr2	+	2	1.03512	0.313592	0.462847
ENSG00000121769.8	chr1	-	2	1.03338	0.314052	0.462847
ENSG00000204580.13	chr6	+	2	1.03265	0.314165	0.462847
ENSG00000115365.12	chr2	-	2	1.03252	0.314195	0.462847
ENSG00000120549.18	chr10	+	2	1.03049	0.314667	0.463186
ENSG00000139567.13	chr12	+	3	1.16795	0.316532	0.465573
ENSG00000156381.9	chr14	-	2	1.0129	0.318794	0.468542
ENSG00000167797.8	chr11	-	2	1.00663	0.320283	0.470286
ENSG00000105643.10	chr19	+	3	1.1552	0.320471	0.470286
ENSG00000231721.7	chr7	-	2	1.00405	0.320898	0.470552
ENSG00000182979.18	chr14	+	3	1.15251	0.321309	0.470796
ENSG00000167491.17	chr19	+	2	0.998134	0.322313	0.471906
ENSG00000158435.8	chr2	+	2	0.996514	0.322703	0.472116
ENSG00000170906.16	chr19	+	2	0.985652	0.32533	0.475596
ENSG00000113758.13	chr5	-	2	0.98367	0.325812	0.475939
ENSG00000150991.15	chr12	-	2	0.975635	0.327833	0.478526
ENSG00000172380.6	chr1	-	2	0.970265	0.329101	0.480012
ENSG00000130299.17	chr19	+	2	0.967303	0.329833	0.480715
ENSG00000103034.14	chr16	+	4	1.15633	0.330402	0.480756
ENSG00000067141.17	chr15	+	2	0.964339	0.330569	0.480756
ENSG00000185532.20	chr10	+	2	0.964158	0.330614	0.480756
ENSG00000105738.11	chr19	+	2	0.96272	0.330971	0.480912
ENSG00000237773.7	chr7	-	2	0.958728	0.331967	0.481993
ENSG00000075234.17	chr22	+	2	0.957011	0.332396	0.482088
ENSG00000135185.12	chr7	-	2	0.955938	0.332665	0.482088
ENSG00000169071.15	chr9	-	2	0.955454	0.332787	0.482088
ENSG00000156414.19	chr14	+	2	0.950945	0.33392	0.483365
ENSG00000100628.12	chr14	-	2	0.9452	0.335371	0.484808
ENSG00000140795.13	chr16	-	4	1.14347	0.335422	0.484808
ENSG00000105220.17	chr19	+	3	1.10557	0.33634	0.485619
ENSG00000165810.17	chr5	+	3	1.10498	0.33649	0.485619
ENSG00000172403.11	chr4	+	2	0.938992	0.337233	0.486325
ENSG00000069667.16	chr15	-	2	0.935623	0.33781	0.486792
ENSG00000151967.18	chr3	+	2	0.931358	0.338904	0.488002
ENSG00000134294.14	chr12	-	2	0.92583	0.340329	0.489686
ENSG00000171444.18	chr5	-	3	1.08662	0.342548	0.492509
ENSG00000122643.22	chr7	-	2	0.911103	0.344166	0.494465
ENSG00000139218.18	chr12	-	2	0.903745	0.346105	0.496715
ENSG00000117595.12	chr1	-	2	0.903199	0.34625	0.496715
ENSG00000149557.14	chr11	-	4	1.11528	0.346671	0.496947
ENSG00000151726.15	chr4	-	3	1.06779	0.348923	0.499802
ENSG00000136108.15	chr13	+	2	0.888213	0.350249	0.501326
ENSG00000152795.18	chr4	-	2	0.885445	0.350994	0.502019
ENSG00000198715.13	chr1	-	2	0.881208	0.35214	0.502948
ENSG00000005022.6	chrX	+	2	0.881103	0.352169	0.502948
ENSG00000104853.16	chr19	+	2	0.868745	0.35554	0.507386
ENSG00000156650.14	chr10	+	2	0.864666	0.356663	0.508609
ENSG00000103994.18	chr15	-	3	1.04344	0.357242	0.509056
ENSG00000166925.9	chr7	-	2	0.85995	0.358051	0.509831
ENSG00000122378.14	chr10	+	2	0.85596	0.359076	0.51091
ENSG00000086848.15	chr11	-	2	0.853845	0.359717	0.511443
ENSG00000109572.14	chr4	+	2	0.852428	0.360061	0.511553
ENSG00000091428.18	chr2	+	2	0.851408	0.360346	0.51158
ENSG00000075131.10	chr15	-	2	0.849209	0.360963	0.512076
ENSG00000100138.15	chr22	-	3	1.03178	0.361319	0.512202
ENSG00000251247.11	chr19	+	2	0.842286	0.362912	0.51408
ENSG00000106682.16	chr7	+	2	0.835867	0.364733	0.516278
ENSG00000106772.18	chr9	-	2	0.833947	0.365371	0.516801
ENSG00000092820.18	chr6	-	2	0.832369	0.36573	0.516927
ENSG00000142230.13	chr19	+	3	1.01783	0.36626	0.517295
ENSG00000108622.11	chr17	-	2	0.82747	0.367134	0.517863
ENSG00000164318.18	chr5	+	2	0.827068	0.36736	0.517863
ENSG00000175216.15	chr11	-	2	0.826292	0.367472	0.517863
ENSG00000104870.13	chr19	+	2	0.822912	0.368447	0.518855
ENSG00000129657.16	chr17	+	3	1.01046	0.368899	0.519081
ENSG00000175920.18	chr4	+	2	0.819807	0.369394	0.519081
ENSG00000079308.19	chr2	-	9	1.09265	0.369419	0.519081
ENSG00000186073.14	chr15	+	2	0.812275	0.371536	0.521674
ENSG00000085831.16	chr1	-	3	1.0004	0.37253	0.522687
ENSG00000159200.18	chr21	-	2	0.807669	0.373168	0.523199
ENSG00000278311.5	chr17	+	2	0.80316	0.374213	0.524281
ENSG00000085276.19	chr3	-	3	0.992072	0.375566	0.525792
ENSG00000055609.20	chr7	-	2	0.796412	0.376212	0.526313
ENSG00000196504.19	chr2	-	2	0.79445	0.376797	0.526746
ENSG00000173264.15	chr11	+	2	0.790171	0.378075	0.528149
ENSG00000223865.11	chr6	+	2	0.787943	0.378744	0.528697
ENSG00000152689.18	chr2	+	3	0.982505	0.379084	0.528788
ENSG00000198218.11	chr3	-	2	0.773884	0.382999	0.533716
ENSG00000068745.15	chr3	-	3	0.971499	0.383174	0.533716
ENSG00000173163.10	chr2	+	2	0.769813	0.384245	0.53482
ENSG00000150527.17	chr14	+	2	0.759469	0.387435	0.538572
ENSG00000103316.12	chr16	-	2	0.758367	0.387777	0.538572
ENSG00000109819.9	chr4	-	2	0.75886	0.387783	0.538572
ENSG00000102575.13	chr19	-	2	0.753865	0.389308	0.539982
ENSG00000198842.10	chr1	+	3	0.955021	0.389381	0.539982
ENSG00000134504.14	chr18	-	2	0.752384	0.389643	0.539982
ENSG00000115657.14	chr2	-	2	0.749483	0.390552	0.540851
ENSG00000132635.17	chr20	-	2	0.748387	0.390912	0.540959
ENSG00000108669.16	chr17	-	3	0.948759	0.391767	0.541351
ENSG00000169554.22	chr2	-	3	0.94841	0.3919	0.541351
ENSG00000166974.13	chr18	+	2	0.744749	0.392042	0.541351
ENSG00000002933.9	chr7	+	2	0.737545	0.394326	0.544113
ENSG00000099917.17	chr22	+	3	0.941251	0.394647	0.544165
ENSG00000171408.14	chr6	+	2	0.735231	0.395063	0.544347
ENSG00000185236.12	chr19	+	2	0.733328	0.395671	0.544794
ENSG00000179632.10	chr8	+	2	0.728485	0.397226	0.546071
ENSG00000038274.17	chr5	+	2	0.727854	0.397428	0.546071
ENSG00000154153.14	chr5	-	2	0.727923	0.397453	0.546071
ENSG00000141012.13	chr16	-	2	0.72227	0.399233	0.548123
ENSG00000104824.18	chr19	-	2	0.717927	0.400644	0.549668
ENSG00000076242.16	chr3	+	2	0.712892	0.40229	0.551531
ENSG00000171992.13	chr5	+	3	0.916051	0.404482	0.554141
ENSG00000178802.18	chr15	+	3	0.915224	0.404802	0.554182
ENSG00000134333.14	chr11	+	2	0.703803	0.405286	0.55445
ENSG00000170473.17	chr12	-	2	0.701529	0.406041	0.554582
ENSG00000170989.10	chr1	+	2	0.700936	0.406238	0.554582
ENSG00000184113.9	chr22	-	2	0.700899	0.40625	0.554582
ENSG00000118689.15	chr6	+	2	0.696989	0.407554	0.555881
ENSG00000077522.14	chr1	+	3	0.907915	0.407781	0.555881
ENSG00000065978.19	chr1	+	2	0.693828	0.408613	0.556619
ENSG00000177169.10	chr12	+	2	0.683929	0.411954	0.560772
ENSG00000164093.17	chr4	-	2	0.681927	0.412813	0.561543
ENSG00000124535.16	chr6	+	2	0.675441	0.414852	0.563916
ENSG00000172992.12	chr17	-	2	0.660299	0.420099	0.570131
ENSG00000108312.15	chr17	-	2	0.660255	0.420114	0.570131
ENSG00000177885.15	chr17	-	2	0.659679	0.420315	0.570131
ENSG00000086666.19	chr15	+	2	0.65299	0.422667	0.572915
ENSG00000168385.18	chr2	+	2	0.646951	0.424807	0.575409
ENSG00000143702.16	chr1	-	2	0.644704	0.425608	0.575988
ENSG00000132849.21	chr1	+	2	0.644068	0.425835	0.575988
ENSG00000089876.12	chr10	-	2	0.642286	0.426472	0.576443
ENSG00000156958.15	chr15	+	2	0.641015	0.426927	0.576652
ENSG00000132640.15	chr20	+	2	0.634695	0.429201	0.579316
ENSG00000132386.11	chr17	+	2	0.631619	0.430316	0.580412
ENSG00000181513.15	chr17	+	2	0.629697	0.431014	0.580945
ENSG00000164050.13	chr3	-	2	0.624951	0.432745	0.582653
ENSG00000082458.12	chrX	+	3	0.846584	0.432889	0.582653
ENSG00000101040.19	chr20	-	2	0.616173	0.435977	0.586398
ENSG00000157600.12	chrX	+	2	0.609193	0.438573	0.589
ENSG00000124788.19	chr6	-	2	0.607139	0.439341	0.589
ENSG00000073417.15	chr15	+	2	0.606595	0.439545	0.589
ENSG00000107738.20	chr10	-	2	0.606484	0.439587	0.589
ENSG00000177685.17	chr11	+	2	0.606218	0.439687	0.589
ENSG00000130592.17	chr11	+	3	0.830625	0.439754	0.589
ENSG00000198105.16	chr10	-	2	0.603515	0.440702	0.589858
ENSG00000133460.19	chr22	+	2	0.601989	0.441277	0.590216
ENSG00000123815.13	chr19	-	4	0.902746	0.442743	0.591763
ENSG00000105647.19	chr19	+	3	0.822121	0.443375	0.592196
ENSG00000213741.11	chr14	-	2	0.591648	0.445206	0.594227
ENSG00000185567.7	chr14	-	2	0.589504	0.446069	0.594588
ENSG00000075239.14	chr11	+	3	0.815349	0.446324	0.594588
ENSG00000198270.13	chr12	-	2	0.588625	0.446406	0.594588
ENSG00000036549.13	chr1	-	2	0.585271	0.447655	0.595838
ENSG00000111846.19	chr6	+	3	0.809259	0.448993	0.596862
ENSG00000073670.14	chr17	+	2	0.581673	0.449047	0.596862
ENSG00000168488.18	chr16	+	2	0.579255	0.449986	0.597696
ENSG00000163964.18	chr3	+	2	0.567999	0.454399	0.602993
ENSG00000137767.14	chr15	+	2	0.567482	0.454603	0.602993
ENSG00000164850.15	chr7	+	2	0.565998	0.45519	0.603355
ENSG00000178096.9	chr1	+	2	0.564056	0.455961	0.603959
ENSG00000165671.21	chr5	+	2	0.561518	0.456971	0.604709
ENSG00000101276.18	chr20	-	2	0.561049	0.457158	0.604709
ENSG00000100605.17	chr14	-	2	0.558911	0.458012	0.605421
ENSG00000137501.17	chr11	-	2	0.553603	0.460144	0.60782
ENSG00000255248.9	chr11	-	3	0.783073	0.460738	0.608187
ENSG00000142507.10	chr17	+	2	0.551083	0.461161	0.608327
ENSG00000126804.13	chr14	+	2	0.548259	0.462306	0.609418
ENSG00000172613.8	chr11	+	2	0.547097	0.462778	0.609621
ENSG00000168214.21	chr4	+	2	0.544856	0.463705	0.610422
ENSG00000109452.12	chr4	-	2	0.541609	0.46502	0.611345
ENSG00000179051.14	chr1	-	2	0.541551	0.465043	0.611345
ENSG00000140718.21	chr16	+	2	0.535389	0.467581	0.614261
ENSG00000185437.14	chr21	+	3	0.767143	0.467936	0.614306
ENSG00000120833.14	chr12	+	4	0.852346	0.468625	0.614677
ENSG00000115290.10	chr2	-	2	0.531883	0.469035	0.614677
ENSG00000186111.11	chr19	-	2	0.531535	0.46918	0.614677
ENSG00000187098.17	chr3	+	3	0.762685	0.469955	0.615272
ENSG00000133067.18	chr1	+	3	0.761661	0.470427	0.61547
ENSG00000189171.14	chr1	-	2	0.524035	0.472317	0.617521
ENSG00000177666.17	chr11	+	2	0.522395	0.473048	0.618056
ENSG00000170290.4	chr11	-	2	0.515843	0.475825	0.620985
ENSG00000100316.16	chr22	-	2	0.515638	0.475937	0.620985
ENSG00000121281.13	chr16	+	3	0.74497	0.478189	0.623498
ENSG00000134884.15	chr13	-	2	0.509669	0.478535	0.623526
ENSG00000130429.15	chr7	+	2	0.508389	0.478972	0.623672
ENSG00000131370.16	chr3	-	2	0.503225	0.481213	0.625339
ENSG00000120885.22	chr8	-	2	0.502626	0.481463	0.625339
ENSG00000080493.18	chr4	+	2	0.502582	0.481482	0.625339
ENSG00000050405.13	chr12	-	2	0.501702	0.481865	0.625339
ENSG00000176155.19	chr17	-	2	0.500948	0.482193	0.625339
ENSG00000266173.7	chr17	-	2	0.500911	0.482209	0.625339
ENSG00000168071.22	chr11	+	2	0.499373	0.482879	0.625785
ENSG00000214063.11	chr11	+	2	0.496957	0.483935	0.62673
ENSG00000230590.11	chrX	-	2	0.494931	0.484823	0.627456
ENSG00000066136.20	chr1	+	2	0.493108	0.485624	0.62807
ENSG00000005302.19	chrX	+	2	0.491906	0.486154	0.628331
ENSG00000175505.11	chr11	-	2	0.49003	0.487063	0.629001
ENSG00000250644.3	chr11	-	2	0.489398	0.487328	0.629001
ENSG00000145016.16	chr3	-	2	0.487567	0.488075	0.629541
ENSG00000099991.18	chr22	+	2	0.486169	0.488696	0.629919
ENSG00000150401.15	chr13	-	2	0.484984	0.489224	0.630176
ENSG00000146729.10	chr7	+	2	0.47925	0.491792	0.632963
ENSG00000100243.21	chr22	-	2	0.478533	0.492115	0.632963
ENSG00000075651.16	chr3	-	2	0.477948	0.492378	0.632963
ENSG00000130294.18	chr2	-	2	0.477214	0.492709	0.632964
ENSG00000166025.18	chr11	+	2	0.476193	0.49317	0.63299
ENSG00000138411.13	chr2	-	2	0.475709	0.493389	0.63299
ENSG00000118473.22	chr1	+	2	0.462666	0.499349	0.640168
ENSG00000164692.18	chr7	+	5	0.844566	0.499651	0.640168
ENSG00000166278.15	chr6	+	2	0.459668	0.500772	0.641175
ENSG00000284969.1	chr11	-	2	0.458869	0.501143	0.641222
ENSG00000132405.19	chr4	+	2	0.455867	0.502504	0.642536
ENSG00000119403.15	chr9	-	2	0.453555	0.503585	0.643489
ENSG00000143740.15	chr1	+	3	0.685267	0.507047	0.646902
ENSG00000171385.10	chr1	-	2	0.445831	0.507226	0.646902
ENSG00000072310.17	chr17	-	2	0.445766	0.507269	0.646902
ENSG00000092871.17	chr17	-	2	0.444297	0.507954	0.647346
ENSG00000140350.15	chr15	-	2	0.433698	0.513038	0.653391
ENSG00000239305.7	chr2	-	2	0.430152	0.514759	0.655147
ENSG00000147526.20	chr8	+	3	0.665564	0.516959	0.657511
ENSG00000174405.14	chr13	-	2	0.424441	0.517551	0.657594
ENSG00000126461.15	chr19	+	2	0.42412	0.517709	0.657594
ENSG00000162772.17	chr1	+	3	0.659858	0.51999	0.660041
ENSG00000198853.12	chr9	+	2	0.418824	0.520325	0.660041
ENSG00000031003.10	chr5	-	2	0.416084	0.521687	0.66116
ENSG00000123636.18	chr2	-	2	0.415011	0.522222	0.66116
ENSG00000105607.13	chr19	+	2	0.414974	0.522241	0.66116
ENSG00000179915.24	chr2	-	3	0.649588	0.525141	0.664393
ENSG00000073711.11	chr3	+	2	0.402749	0.52841	0.668089
ENSG00000168309.18	chr3	-	3	0.63999	0.530173	0.669876
ENSG00000105810.10	chr7	-	2	0.398335	0.53067	0.670062
ENSG00000171700.14	chr20	-	2	0.395013	0.532382	0.671583
ENSG00000121316.11	chr12	-	2	0.394641	0.532574	0.671583
ENSG00000175699.15	chr14	+	2	0.392877	0.533489	0.672294
ENSG00000146112.12	chr6	-	3	0.63272	0.533924	0.672401
ENSG00000183963.19	chr22	+	2	0.391345	0.534284	0.672413
ENSG00000089157.16	chr12	-	2	0.383451	0.538421	0.677175
ENSG00000088387.19	chr13	-	2	0.381105	0.539662	0.678291
ENSG00000114541.15	chr3	-	5	0.779779	0.540413	0.678789
ENSG00000048540.15	chr12	-	2	0.378925	0.54082	0.678857
ENSG00000101871.16	chrX	-	2	0.375221	0.542798	0.680726
ENSG00000187079.20	chr11	+	2	0.374306	0.543289	0.680726
ENSG00000234520.6	chr7	-	2	0.37281	0.544163	0.680726
ENSG00000112893.10	chr5	+	2	0.371693	0.544694	0.680726
ENSG00000101605.13	chr18	-	2	0.371765	0.544718	0.680726
ENSG00000109501.14	chr4	+	2	0.371564	0.544764	0.680726
ENSG00000099341.12	chr19	+	2	0.371508	0.544794	0.680726
ENSG00000196588.20	chr22	-	2	0.367177	0.54714	0.682923
ENSG00000240771.8	chr12	+	2	0.366949	0.547264	0.682923
ENSG00000143774.17	chr1	+	3	0.60607	0.54811	0.683534
ENSG00000160710.18	chr1	-	2	0.363873	0.548943	0.684065
ENSG00000135679.25	chr12	+	2	0.363313	0.549249	0.684065
ENSG00000136068.15	chr3	+	2	0.362526	0.54968	0.684157
ENSG00000102547.19	chr13	-	2	0.346781	0.558449	0.69462
ENSG00000135090.14	chr12	-	2	0.345082	0.559411	0.695028
ENSG00000204681.11	chr6	-	2	0.344182	0.559922	0.695028
ENSG00000158169.13	chr9	-	2	0.343415	0.560358	0.695028
ENSG00000198964.14	chr10	-	2	0.34317	0.560497	0.695028
ENSG00000077782.21	chr8	-	2	0.343011	0.560588	0.695028
ENSG00000187288.12	chr3	-	2	0.338955	0.563079	0.697666
ENSG00000147255.19	chrX	-	2	0.337251	0.563888	0.698204
ENSG00000115194.11	chr2	-	2	0.336636	0.564242	0.698204
ENSG00000113312.11	chr5	+	2	0.335233	0.565053	0.698756
ENSG00000188730.5	chr7	+	2	0.334343	0.565574	0.69895
ENSG00000100897.18	chr14	+	2	0.331874	0.567002	0.69964
ENSG00000100284.22	chr22	+	2	0.331873	0.567003	0.69964
ENSG00000197580.13	chr11	+	2	0.331541	0.567226	0.69964
ENSG00000141298.19	chr17	-	2	0.329009	0.568675	0.700976
ENSG00000186260.17	chr16	+	3	0.566993	0.569614	0.701031
ENSG00000163660.12	chr3	-	2	0.327204	0.569814	0.701031
ENSG00000135956.9	chr2	-	2	0.327065	0.569816	0.701031
ENSG00000166091.21	chr14	+	2	0.323947	0.571655	0.702843
ENSG00000215386.13	chr21	+	3	0.558877	0.574187	0.705503
ENSG00000179010.15	chr4	+	2	0.318574	0.574885	0.705534
ENSG00000168734.14	chr20	+	2	0.318415	0.574948	0.705534
ENSG00000090924.15	chr19	+	2	0.317706	0.575373	0.705604
ENSG00000168405.17	chr6	-	3	0.555509	0.576096	0.70604
ENSG00000155324.10	chr5	+	2	0.315015	0.576991	0.706498
ENSG00000170638.10	chr22	+	2	0.314657	0.577207	0.706498
ENSG00000185624.16	chr17	-	3	0.545053	0.582065	0.71199
ENSG00000062716.13	chr17	+	2	0.306087	0.582484	0.712049
ENSG00000136925.15	chr9	-	2	0.305275	0.582923	0.712131
ENSG00000107798.18	chr10	-	2	0.303513	0.584009	0.713004
ENSG00000069122.19	chr6	-	2	0.302378	0.584711	0.713407
ENSG00000138772.13	chr4	+	2	0.301318	0.585368	0.713755
ENSG00000156265.16	chr21	+	2	0.299393	0.586619	0.71473
ENSG00000179335.19	chr15	+	2	0.298835	0.586913	0.71473
ENSG00000184702.20	chr22	+	3	0.535509	0.587567	0.714779
ENSG00000117399.14	chr1	+	2	0.297579	0.587699	0.714779
ENSG00000148985.20	chr11	+	3	0.53405	0.588414	0.715195
ENSG00000151503.13	chr11	-	2	0.295167	0.589212	0.715459
ENSG00000182732.18	chr14	+	2	0.294905	0.589377	0.715459
ENSG00000082014.17	chr7	-	2	0.292717	0.590785	0.716367
ENSG00000132478.10	chr17	+	2	0.292536	0.590872	0.716367
ENSG00000165868.16	chr10	-	2	0.291429	0.591573	0.716764
ENSG00000172346.15	chr22	+	2	0.290268	0.592311	0.717204
ENSG00000080709.16	chr5	+	2	0.281414	0.598017	0.723657
ENSG00000222041.11	chr2	+	2	0.280699	0.598462	0.723717
ENSG00000010818.10	chr6	-	2	0.280258	0.598821	0.723717
ENSG00000262660.1	chr17	+	2	0.27854	0.599868	0.724525
ENSG00000204482.11	chr6	+	2	0.274338	0.602626	0.727398
ENSG00000151067.22	chr12	+	2	0.2692	0.606056	0.731079
ENSG00000123124.14	chr8	+	2	0.267578	0.607119	0.731683
ENSG00000106069.23	chr7	+	2	0.267277	0.60732	0.731683
ENSG00000119917.15	chr10	+	2	0.266288	0.608134	0.732204
ENSG00000163347.6	chr3	-	2	0.263055	0.610166	0.733892
ENSG00000143951.16	chr2	-	3	0.49693	0.610362	0.733892
ENSG00000068831.19	chr11	-	3	0.496131	0.610843	0.733892
ENSG00000204257.15	chr6	-	2	0.261769	0.611067	0.733892
ENSG00000059691.12	chr4	-	3	0.494898	0.611588	0.734058
ENSG00000186716.21	chr22	+	2	0.257356	0.614053	0.736267
ENSG00000137094.15	chr9	+	3	0.490644	0.614195	0.736267
ENSG00000228794.10	chr1	+	2	0.255732	0.61517	0.736894
ENSG00000266412.6	chr10	-	2	0.255206	0.615532	0.736894
ENSG00000178860.9	chr8	-	2	0.254813	0.615871	0.736894
ENSG00000156709.15	chrX	-	3	0.482924	0.61886	0.740008
ENSG00000264247.2	chr18	-	2	0.248014	0.620543	0.7412
ENSG00000138735.16	chr4	-	2	0.24789	0.620629	0.7412
ENSG00000083312.18	chr5	+	2	0.24568	0.622188	0.742598
ENSG00000057657.17	chr6	+	2	0.244875	0.622757	0.742816
ENSG00000168000.15	chr11	-	2	0.243591	0.623669	0.742998
ENSG00000183023.18	chr2	-	3	0.475061	0.623685	0.742998
ENSG00000164125.16	chr4	-	2	0.241942	0.624843	0.743905
ENSG00000164849.10	chr7	+	2	0.241412	0.625222	0.743905
ENSG00000136167.15	chr13	-	2	0.240084	0.626173	0.744575
ENSG00000093183.14	chr3	-	2	0.237565	0.627985	0.746267
ENSG00000083720.13	chr5	-	2	0.233834	0.630692	0.74902
ENSG00000153406.14	chr16	-	2	0.230697	0.632989	0.750614
ENSG00000168575.10	chr8	-	2	0.230509	0.633127	0.750614
ENSG00000115183.15	chr2	+	2	0.230399	0.633208	0.750614
ENSG00000105697.9	chr19	+	2	0.228193	0.634973	0.752241
ENSG00000095370.20	chr9	-	3	0.451824	0.638168	0.755419
ENSG00000165912.16	chr11	-	2	0.223352	0.638443	0.755419
ENSG00000166965.12	chr15	+	2	0.221279	0.640002	0.756543
ENSG00000235109.7	chr6	-	2	0.22104	0.640182	0.756543
ENSG00000232310.8	chr6	-	2	0.218619	0.642039	0.758271
ENSG00000079459.13	chr8	+	2	0.217851	0.6426	0.758466
ENSG00000167543.16	chr17	+	3	0.443164	0.643653	0.759241
ENSG00000176170.14	chr17	+	2	0.215537	0.644477	0.759433
ENSG00000057294.15	chr12	-	2	0.215225	0.644607	0.759433
ENSG00000205189.12	chr8	+	2	0.214556	0.645121	0.759572
ENSG00000136143.16	chr13	-	2	0.212452	0.646743	0.761014
ENSG00000140199.13	chr15	-	2	0.208417	0.649881	0.764238
ENSG00000137507.11	chr11	-	2	0.207256	0.650814	0.764866
ENSG00000126970.16	chrX	-	2	0.206198	0.651623	0.765348
ENSG00000196482.18	chr1	-	5	0.613407	0.653777	0.767408
ENSG00000115649.16	chr2	-	2	0.201682	0.655202	0.76861
ENSG00000172530.20	chr16	+	2	0.198978	0.657369	0.770521
ENSG00000255399.4	chr12	+	2	0.198264	0.657944	0.770521
ENSG00000165929.13	chr14	-	2	0.1978	0.658318	0.770521
ENSG00000101191.17	chr20	-	2	0.197652	0.658438	0.770521
ENSG00000198668.13	chr14	+	2	0.195525	0.660182	0.771944
ENSG00000088682.14	chr16	+	2	0.195159	0.660459	0.771944
ENSG00000232119.8	chrX	+	2	0.194377	0.661096	0.772219
ENSG00000115677.17	chr2	-	5	0.595285	0.666712	0.778251
ENSG00000184182.19	chr2	+	2	0.187019	0.667169	0.778251
ENSG00000175550.8	chr11	+	2	0.186649	0.667478	0.778251
ENSG00000172262.11	chr5	+	3	0.405427	0.668128	0.778535
ENSG00000198844.12	chr17	+	2	0.184958	0.668895	0.778956
ENSG00000224318.6	chr3	-	2	0.175942	0.676605	0.787117
ENSG00000183098.11	chr13	+	2	0.175862	0.676723	0.787117
ENSG00000092969.12	chr1	+	2	0.175334	0.677211	0.787207
ENSG00000196704.14	chr17	+	2	0.173465	0.678737	0.788502
ENSG00000187773.9	chr18	-	2	0.171273	0.680657	0.790254
ENSG00000118971.9	chr12	+	2	0.170434	0.681396	0.790634
ENSG00000108852.15	chr17	-	2	0.16996	0.681814	0.790641
ENSG00000131386.19	chr3	+	2	0.166859	0.684569	0.793355
ENSG00000197565.16	chrX	-	2	0.163935	0.687193	0.795079
ENSG00000198947.17	chrX	-	3	0.376705	0.687395	0.795079
ENSG00000164951.16	chr8	+	2	0.163616	0.687481	0.795079
ENSG00000240849.11	chr20	-	2	0.163358	0.687714	0.795079
ENSG00000179583.20	chr16	+	4	0.491627	0.688898	0.795867
ENSG00000172009.15	chr19	+	2	0.16169	0.689226	0.795867
ENSG00000067208.14	chr1	-	2	0.158731	0.691932	0.798511
ENSG00000126456.16	chr19	-	2	0.157406	0.693153	0.799439
ENSG00000069424.15	chr1	+	3	0.367444	0.693728	0.799621
ENSG00000187720.14	chr15	+	2	0.156166	0.694344	0.799851
ENSG00000177200.17	chr16	+	4	0.47993	0.696979	0.801593
ENSG00000158856.18	chr8	+	4	0.479101	0.697553	0.801593
ENSG00000102226.10	chrX	+	2	0.152544	0.697685	0.801593
ENSG00000101940.18	chrX	+	2	0.152049	0.698151	0.801593
ENSG00000113916.18	chr3	-	2	0.151879	0.698311	0.801593
ENSG00000160753.16	chr1	+	2	0.151823	0.698364	0.801593
ENSG00000111639.8	chr12	-	2	0.149844	0.700238	0.803175
ENSG00000167703.15	chr17	-	2	0.148404	0.701611	0.803175
ENSG00000211448.13	chr14	-	2	0.1475	0.70248	0.803175
ENSG00000275131.3	chr1	-	2	0.147487	0.702489	0.803175
ENSG00000102125.16	chrX	+	2	0.147136	0.702825	0.803175
ENSG00000079435.10	chr19	-	2	0.147128	0.702884	0.803175
ENSG00000104205.16	chr8	+	2	0.146379	0.703554	0.803175
ENSG00000167705.12	chr17	-	2	0.146294	0.703635	0.803175
ENSG00000154358.23	chr1	+	3	0.352855	0.703826	0.803175
ENSG00000022840.16	chr12	+	3	0.352707	0.70393	0.803175
ENSG00000198157.11	chrX	-	2	0.144523	0.705349	0.804073
ENSG00000027075.15	chr14	+	2	0.14431	0.705555	0.804073
ENSG00000136574.18	chr8	+	3	0.34474	0.709508	0.808098
ENSG00000117298.16	chr1	-	3	0.342762	0.710901	0.809203
ENSG00000183044.12	chr16	+	2	0.136056	0.713755	0.811971
ENSG00000054148.18	chr9	+	2	0.134233	0.715545	0.813024
ENSG00000143632.14	chr1	-	2	0.134194	0.715686	0.813024
ENSG00000138867.17	chr22	-	2	0.133644	0.716142	0.813024
ENSG00000108219.15	chr10	+	2	0.132683	0.717119	0.813024
ENSG00000151276.23	chr3	-	2	0.132675	0.717128	0.813024
ENSG00000112137.18	chr6	+	3	0.333858	0.717225	0.813024
ENSG00000159267.16	chr21	-	2	0.131911	0.717907	0.813317
ENSG00000173598.14	chr12	+	2	0.130246	0.719616	0.814771
ENSG00000112183.15	chr6	+	2	0.128363	0.721562	0.816493
ENSG00000005882.12	chr17	+	2	0.12706	0.722919	0.817546
ENSG00000076770.14	chrX	-	2	0.126053	0.723973	0.818255
ENSG00000109654.16	chr4	+	2	0.124831	0.725258	0.819225
ENSG00000124155.18	chr20	+	3	0.320258	0.726938	0.82064
ENSG00000143153.13	chr1	+	2	0.122115	0.72814	0.821341
ENSG00000181409.14	chr17	-	2	0.121734	0.728547	0.821341
ENSG00000226688.7	chr10	-	2	0.121457	0.728844	0.821341
ENSG00000164054.15	chr3	-	2	0.119577	0.730866	0.823137
ENSG00000167074.15	chr22	+	2	0.118926	0.73157	0.823446
ENSG00000136986.10	chr8	-	2	0.116624	0.734079	0.825682
ENSG00000140939.14	chr16	+	2	0.115992	0.734772	0.825682
ENSG00000167740.10	chr17	+	2	0.115923	0.734848	0.825682
ENSG00000092068.20	chr14	-	2	0.11521	0.735633	0.82608
ENSG00000131089.17	chrX	-	3	0.30661	0.736845	0.82657
ENSG00000012223.13	chr3	-	2	0.113695	0.737312	0.82657
ENSG00000122390.19	chr16	+	2	0.113649	0.737363	0.82657
ENSG00000136156.15	chr13	+	3	0.305221	0.737874	0.826661
ENSG00000285938.1	chr3	+	2	0.106806	0.745134	0.834307
ENSG00000198420.10	chr7	-	2	0.104284	0.748021	0.837051
ENSG00000127870.17	chr13	-	2	0.101866	0.750859	0.839736
ENSG00000169519.21	chr11	+	2	0.100827	0.752091	0.840623
ENSG00000278189.1	chr21	+	2	0.0983529	0.755135	0.843375
ENSG00000167680.17	chr19	-	2	0.0980356	0.755432	0.843375
ENSG00000163485.17	chr1	+	2	0.0970645	0.756607	0.843851
ENSG00000198695.2	chrM	-	2	0.0969669	0.756738	0.843851
ENSG00000172757.13	chr11	-	2	0.0962724	0.757569	0.844287
ENSG00000118137.10	chr11	-	2	0.0956615	0.758333	0.844374
ENSG00000092931.11	chr17	+	2	0.0954878	0.758528	0.844374
ENSG00000129084.18	chr11	-	2	0.0918776	0.762993	0.848852
ENSG00000198722.14	chr9	+	2	0.0897645	0.765652	0.851316
ENSG00000185033.14	chr15	+	2	0.0889579	0.766675	0.85196
ENSG00000272288.6	chr6	+	2	0.0874966	0.768543	0.853541
ENSG00000135778.12	chr1	+	2	0.0862434	0.770158	0.85484
ENSG00000185010.15	chrX	-	2	0.0840984	0.772953	0.857248
ENSG00000041880.15	chr3	+	2	0.0838937	0.773222	0.857248
ENSG00000245060.8	chr5	+	2	0.0834597	0.773792	0.857385
ENSG00000241058.4	chr10	-	2	0.0825927	0.774938	0.858158
ENSG00000027001.10	chr13	-	2	0.0815463	0.776329	0.859203
ENSG00000169764.16	chr2	+	3	0.251705	0.778121	0.86069
ENSG00000179409.11	chr17	-	2	0.0783856	0.78059	0.862438
ENSG00000163092.21	chr2	+	2	0.0783872	0.780601	0.862438
ENSG00000182871.16	chr21	+	2	0.0749492	0.785329	0.867163
ENSG00000261371.6	chr17	-	2	0.074308	0.786227	0.867654
ENSG00000158793.14	chr1	+	2	0.0739269	0.786762	0.867671
ENSG00000075914.13	chr3	+	2	0.0736531	0.787147	0.867671
ENSG00000246695.8	chr12	-	2	0.0712401	0.790578	0.870953
ENSG00000144366.16	chr2	+	2	0.0700579	0.792282	0.872006
ENSG00000137831.15	chr15	-	2	0.069946	0.792444	0.872006
ENSG00000163820.15	chr3	-	2	0.0678376	0.795523	0.874893
ENSG00000171631.16	chr11	+	3	0.228309	0.796423	0.875381
ENSG00000148053.17	chr9	+	2	0.0663946	0.797661	0.876239
ENSG00000116731.22	chr1	+	2	0.066006	0.798241	0.876374
ENSG00000104967.8	chr19	-	2	0.065616	0.798824	0.876513
ENSG00000108984.15	chr17	+	2	0.0642303	0.800914	0.878303
ENSG00000182957.16	chr13	+	2	0.0636706	0.801764	0.878734
ENSG00000204590.12	chr6	-	2	0.0626404	0.80334	0.879958
ENSG00000241878.11	chr22	-	2	0.0620521	0.804247	0.880395
ENSG00000123358.20	chr12	+	3	0.217993	0.804657	0.880395
ENSG00000123562.18	chrX	-	2	0.0608233	0.806155	0.881347
ENSG00000008056.14	chrX	-	2	0.0606363	0.806447	0.881347
ENSG00000178796.13	chr1	+	2	0.0595487	0.808155	0.882266
ENSG00000132906.18	chr1	-	2	0.0595161	0.808207	0.882266
ENSG00000152556.17	chr12	+	5	0.396376	0.810923	0.884727
ENSG00000145743.17	chr5	-	2	0.0574788	0.811453	0.884802
ENSG00000166140.17	chr15	+	2	0.056081	0.813716	0.886766
ENSG00000204438.11	chr6	-	2	0.0543359	0.816583	0.889109
ENSG00000156110.15	chr10	+	2	0.0541678	0.816862	0.889109
ENSG00000105707.15	chr19	+	2	0.0539302	0.817257	0.889109
ENSG00000128641.19	chr2	+	2	0.0518849	0.820694	0.892308
ENSG00000143554.14	chr1	+	2	0.0516295	0.821128	0.892308
ENSG00000171988.19	chr10	-	3	0.195464	0.822866	0.893476
ENSG00000129824.16	chrY	+	2	0.0503162	0.823379	0.893476
ENSG00000127946.17	chr7	-	2	0.0501879	0.8236	0.893476
ENSG00000141524.17	chr17	-	2	0.0498362	0.824209	0.893631
ENSG00000127483.19	chr1	-	2	0.0483181	0.826863	0.896001
ENSG00000186815.13	chr12	+	2	0.0464006	0.830278	0.898833
ENSG00000147065.17	chrX	+	2	0.0462158	0.830611	0.898833
ENSG00000008130.15	chr1	-	2	0.0460661	0.830881	0.898833
ENSG00000205678.8	chr4	-	2	0.0456712	0.831597	0.899099
ENSG00000113441.16	chr5	+	2	0.0432639	0.836028	0.903046
ENSG00000140830.9	chr16	-	2	0.0427873	0.836921	0.903046
ENSG00000103710.11	chr15	-	2	0.042681	0.837126	0.903046
ENSG00000114853.15	chr3	+	2	0.04225	0.837933	0.903046
ENSG00000135636.14	chr2	+	2	0.0422313	0.837969	0.903046
ENSG00000174197.16	chr15	+	2	0.0421768	0.838072	0.903046
ENSG00000068971.14	chr11	+	2	0.0411154	0.840094	0.904446
ENSG00000135316.19	chr6	-	2	0.0409121	0.840484	0.904446
ENSG00000188191.15	chr7	-	2	0.0406024	0.841081	0.904446
ENSG00000146834.14	chr7	+	2	0.0402939	0.841693	0.904446
ENSG00000167291.16	chr17	-	2	0.0401597	0.841938	0.904446
ENSG00000183230.17	chr10	-	2	0.0399166	0.84241	0.904446
ENSG00000153815.17	chr16	+	2	0.0397823	0.842672	0.904446
ENSG00000104490.18	chr8	-	2	0.0393583	0.843501	0.90483
ENSG00000130176.8	chr19	+	3	0.169656	0.844281	0.90516
ENSG00000180155.20	chr8	-	2	0.0386596	0.844878	0.905171
ENSG00000163848.20	chr3	-	2	0.0384794	0.845236	0.905171
ENSG00000247596.10	chr3	-	2	0.0375408	0.847111	0.906673
ENSG00000152700.14	chr5	-	2	0.0368777	0.84845	0.9076
ENSG00000154309.9	chr1	+	2	0.0334483	0.855585	0.914458
ENSG00000175866.15	chr17	+	2	0.0333407	0.855815	0.914458
ENSG00000146083.12	chr5	-	2	0.0330515	0.856434	0.914611
ENSG00000163635.20	chr3	+	2	0.0324632	0.857704	0.915457
ENSG00000159720.12	chr16	-	2	0.0320157	0.858677	0.915986
ENSG00000106617.15	chr7	-	4	0.251348	0.860206	0.917107
ENSG00000136100.14	chr13	-	2	0.0303895	0.862275	0.918712
ENSG00000023171.18	chr11	+	3	0.148011	0.86267	0.918712
ENSG00000135250.17	chr7	-	3	0.146036	0.864369	0.919033
ENSG00000117528.14	chr1	+	2	0.0293272	0.86468	0.919033
ENSG00000073849.16	chr3	+	3	0.145124	0.865154	0.919033
ENSG00000089159.17	chr12	-	2	0.0290858	0.865232	0.919033
ENSG00000133315.12	chr11	-	2	0.0290272	0.865367	0.919033
ENSG00000274750.2	chr6	+	2	0.0280236	0.867692	0.92058
ENSG00000110077.14	chr11	-	2	0.0279858	0.867784	0.92058
ENSG00000126246.10	chr19	-	2	0.0275218	0.868871	0.921224
ENSG00000184060.11	chr17	+	2	0.0272149	0.869597	0.921485
ENSG00000138674.17	chr4	-	2	0.0265443	0.871199	0.922673
ENSG00000137486.17	chr11	-	2	0.0255525	0.873607	0.923902
ENSG00000204138.13	chr1	+	2	0.0253664	0.874064	0.923902
ENSG00000188343.13	chr8	+	2	0.0253318	0.87415	0.923902
ENSG00000152413.15	chr5	-	2	0.0252762	0.874286	0.923902
ENSG00000166398.14	chr19	+	2	0.0237367	0.878143	0.927466
ENSG00000130558.20	chr9	+	2	0.0230563	0.879896	0.927992
ENSG00000166451.14	chr16	+	2	0.0228513	0.88042	0.927992
ENSG00000152242.11	chr18	+	2	0.0227072	0.880794	0.927992
ENSG00000114480.13	chr3	-	2	0.0226373	0.880984	0.927992
ENSG00000104951.16	chr19	-	2	0.0226101	0.88106	0.927992
ENSG00000105204.14	chr19	-	2	0.0220481	0.882524	0.929024
ENSG00000107968.10	chr10	+	2	0.0213155	0.884496	0.930589
ENSG00000086758.16	chrX	-	2	0.0200804	0.887851	0.933141
ENSG00000213722.10	chr6	-	2	0.0197913	0.888656	0.933141
ENSG00000173451.7	chr12	+	2	0.0196814	0.889001	0.933141
ENSG00000105699.17	chr19	+	2	0.0193982	0.88976	0.933141
ENSG00000101413.12	chr20	+	3	0.116788	0.889934	0.933141
ENSG00000163539.17	chr3	-	3	0.11616	0.890491	0.933141
ENSG00000087266.17	chr4	+	2	0.0190282	0.89081	0.933141
ENSG00000130024.15	chr6	-	2	0.0190266	0.890814	0.933141
ENSG00000100354.21	chr22	+	2	0.017932	0.893982	0.935365
ENSG00000137502.10	chr11	-	2	0.0178684	0.894169	0.935365
ENSG00000114993.17	chr2	-	2	0.0176128	0.894924	0.935365
ENSG00000065882.16	chr4	+	2	0.017564	0.895069	0.935365
ENSG00000172159.16	chr9	-	2	0.0174608	0.895376	0.935365
ENSG00000177311.11	chr3	+	2	0.0170949	0.896471	0.936
ENSG00000113742.14	chr5	+	4	0.198323	0.897308	0.936364
ENSG00000092964.18	chr8	+	2	0.0164383	0.898468	0.937064
ENSG00000010282.15	chr3	-	2	0.016166	0.899308	0.93743
ENSG00000161958.11	chr17	+	3	0.105104	0.900362	0.93765
ENSG00000086200.17	chr5	+	2	0.0157847	0.900496	0.93765
ENSG00000135631.17	chr2	-	2	0.0154999	0.901393	0.938075
ENSG00000267082.1	chr19	+	2	0.0153115	0.901991	0.938188
ENSG00000170153.11	chr4	-	2	0.0148834	0.903364	0.939106
ENSG00000196230.14	chr6	+	2	0.0144191	0.904882	0.939939
ENSG00000137070.18	chr9	+	2	0.0143372	0.905145	0.939939
ENSG00000128951.14	chr15	+	2	0.0139623	0.906387	0.94072
ENSG00000107796.13	chr10	-	2	0.0123271	0.912015	0.94594
ENSG00000133065.11	chr1	-	2	0.0121381	0.912689	0.94594
ENSG00000163156.12	chr1	+	2	0.0120805	0.912896	0.94594
ENSG00000115902.11	chr2	+	2	0.011578	0.914719	0.947317
ENSG00000023734.11	chr12	+	2	0.0112639	0.91588	0.948007
ENSG00000185129.8	chr5	+	2	0.0104618	0.918919	0.95064
ENSG00000164107.9	chr4	-	3	0.0810265	0.922249	0.953216
ENSG00000163694.15	chr4	-	2	0.00950932	0.922686	0.953216
ENSG00000116194.13	chr1	-	2	0.00934188	0.923367	0.953216
ENSG00000078596.11	chrX	-	2	0.00918827	0.923998	0.953216
ENSG00000102967.12	chr16	+	2	0.00906984	0.924488	0.953216
ENSG00000141013.17	chr16	+	2	0.00888559	0.925256	0.953216
ENSG00000139132.15	chr12	+	4	0.156457	0.925297	0.953216
ENSG00000197714.9	chr19	+	2	0.00885491	0.925385	0.953216
ENSG00000153310.19	chr8	-	2	0.00847072	0.927017	0.954385
ENSG00000132170.23	chr3	+	2	0.00820634	0.928162	0.95505
ENSG00000145990.11	chr6	-	2	0.00763173	0.930716	0.957165
ENSG00000225377.6	chr20	-	2	0.00657156	0.935696	0.961771
ENSG00000120278.16	chr6	+	2	0.00579462	0.939609	0.965276
ENSG00000160392.13	chr19	-	2	0.00569048	0.940153	0.965318
ENSG00000135241.17	chr7	-	2	0.00558396	0.940715	0.965378
ENSG00000099260.11	chr1	+	2	0.00528501	0.942321	0.966376
ENSG00000133083.15	chr13	-	3	0.0590592	0.942695	0.966376
ENSG00000112541.18	chr6	-	4	0.126875	0.943975	0.967171
ENSG00000012232.9	chr8	+	2	0.00471089	0.945538	0.967818
ENSG00000100124.15	chr22	-	2	0.00469755	0.945615	0.967818
ENSG00000177628.16	chr1	-	2	0.00428899	0.948031	0.969392
ENSG00000165269.13	chr9	-	2	0.00426692	0.948164	0.969392
ENSG00000174851.16	chr11	-	2	0.00274518	0.958418	0.978953
ENSG00000092929.12	chr17	-	2	0.00272698	0.95855	0.978953
ENSG00000188643.11	chr1	-	2	0.0026619	0.959047	0.978953
ENSG00000108953.17	chr17	-	2	0.00243635	0.960819	0.98024
ENSG00000144524.18	chr2	+	2	0.00235438	0.961483	0.980396
ENSG00000110693.18	chr11	-	2	0.0022503	0.962343	0.980752
ENSG00000160180.16	chr21	-	2	0.00181442	0.966188	0.984147
ENSG00000121964.14	chr2	-	2	0.00154503	0.968794	0.986004
ENSG00000160072.20	chr1	+	2	0.00148782	0.969377	0.986004
ENSG00000148339.12	chr9	+	2	0.00147082	0.969554	0.986004
ENSG00000036448.10	chr8	+	3	0.0289216	0.971503	0.987129
ENSG00000130528.12	chr19	-	2	0.00123003	0.972158	0.987129
ENSG00000188938.17	chr9	-	3	0.0282004	0.972204	0.987129
ENSG00000100196.11	chr22	+	2	0.0010023	0.974863	0.988962
ENSG00000186104.11	chr11	-	2	0.000988184	0.975041	0.988962
ENSG00000124181.14	chr20	+	2	0.000776129	0.977879	0.99104
ENSG00000188176.12	chr17	+	2	0.000759151	0.978123	0.99104
ENSG00000198042.11	chr8	+	2	0.000577436	0.980919	0.992853
ENSG00000137496.18	chr11	+	2	0.000575736	0.980947	0.992853
ENSG00000132938.22	chr13	+	2	0.000499765	0.982249	0.993262
ENSG00000168016.15	chr3	-	2	0.000492009	0.982387	0.993262
ENSG00000188677.15	chr22	+	2	0.000396775	0.984183	0.994478
ENSG00000125741.5	chr19	-	2	0.000326016	0.985663	0.994478
ENSG00000182551.14	chr2	-	2	0.000285071	0.986593	0.994478
ENSG00000173638.19	chr21	-	2	0.000277961	0.986761	0.994478
ENSG00000113657.13	chr5	-	2	0.000260842	0.987176	0.994478
ENSG00000108515.18	chr17	+	2	0.000236734	0.987783	0.994478
ENSG00000147130.14	chrX	-	2	0.000217924	0.988277	0.994478
ENSG00000176728.10	chrY	-	2	0.000211903	0.98844	0.994478
ENSG00000196605.7	chr19	-	2	0.000208601	0.988531	0.994478
ENSG00000137497.18	chr11	-	4	0.0399617	0.98928	0.994478
ENSG00000081277.13	chr1	+	2	0.000181788	0.989293	0.994478
ENSG00000008853.17	chr8	+	3	0.00819759	0.991837	0.995972
ENSG00000006194.10	chr16	+	2	9.54239e-05	0.992243	0.995972
ENSG00000109670.16	chr4	-	3	0.00769371	0.992337	0.995972
ENSG00000158864.13	chr1	+	2	7.02461e-05	0.993344	0.996462
ENSG00000165192.14	chrX	-	2	5.2921e-05	0.994223	0.996822
ENSG00000108821.14	chr17	-	7	0.113283	0.994778	0.996857
ENSG00000187239.17	chr9	-	2	2.16704e-05	0.996303	0.997864
ENSG00000172348.15	chr6	-	2	1.40183e-05	0.997027	0.998067
ENSG00000146147.15	chr6	+	2	8.86335e-06	0.997636	0.998156
ENSG00000017427.17	chr12	-	2	3.73195e-06	0.998466	0.998466

## Sheet: CAGE.DPU.M.Healthy.Ventricle
geneId	cluster_chr	cluster_strand	NExons	gene.F	P.Value	FDR
ENSG00000078114.19	chr10	-	7	25.0074	1.01306e-17	1.94304e-14
ENSG00000108821.14	chr17	-	7	21.7014	5.34044e-16	5.12149e-13
ENSG00000164692.18	chr7	+	5	31.1905	5.78593e-15	3.69914e-12
ENSG00000115414.21	chr2	-	5	30.3732	1.07763e-14	5.16723e-12
ENSG00000162614.19	chr1	+	3	64.2761	7.13917e-14	2.73859e-11
ENSG00000155657.28	chr2	-	6	21.3368	1.06572e-13	3.40675e-11
ENSG00000106263.18	chr7	+	2	128.146	1.15112e-12	3.15406e-10
ENSG00000126247.11	chr19	+	3	48.3193	6.74375e-12	1.61681e-09
ENSG00000167978.17	chr16	+	4	28.9689	1.48823e-11	3.17157e-09
ENSG00000197111.16	chr12	+	3	44.2871	2.50562e-11	4.80579e-09
ENSG00000095787.24	chr10	+	2	86.8507	1.36487e-10	2.37983e-08
ENSG00000101160.15	chr20	-	3	36.6717	3.77025e-10	6.02612e-08
ENSG00000119729.12	chr2	+	3	36.2633	4.40306e-10	6.49621e-08
ENSG00000157654.19	chr9	+	7	11.5832	9.87874e-10	1.35339e-07
ENSG00000130522.6	chr19	-	2	71.755	1.21061e-09	1.54796e-07
ENSG00000204628.12	chr5	-	5	16.4255	1.47232e-09	1.76494e-07
ENSG00000072518.22	chr11	+	2	66.9677	2.58978e-09	2.92189e-07
ENSG00000110651.12	chr11	+	3	30.6032	4.25691e-09	4.53598e-07
ENSG00000078304.19	chr14	+	3	30.2124	5.02313e-09	5.07071e-07
ENSG00000144802.11	chr3	+	2	60.3716	7.87275e-09	7.34856e-07
ENSG00000154678.18	chr7	-	2	60.2471	8.04587e-09	7.34856e-07
ENSG00000127603.30	chr1	+	8	9.02028	9.37073e-09	8.16957e-07
ENSG00000196562.14	chr20	-	2	56.0052	1.7204e-08	1.43467e-06
ENSG00000124380.11	chr2	+	2	55.6103	1.85008e-08	1.44496e-06
ENSG00000231500.7	chr6	+	2	55.7036	1.88342e-08	1.44496e-06
ENSG00000182979.18	chr14	+	3	26.605	2.4596e-08	1.81443e-06
ENSG00000142173.16	chr21	+	4	17.4553	3.49814e-08	2.48497e-06
ENSG00000097007.19	chr9	+	2	51.0222	4.41488e-08	3.0242e-06
ENSG00000160271.16	chr9	-	3	24.8908	5.45392e-08	3.60711e-06
ENSG00000119335.17	chr9	+	2	49.7315	5.68934e-08	3.63739e-06
ENSG00000022267.19	chrX	+	5	12.9383	5.96275e-08	3.68921e-06
ENSG00000104763.20	chr8	-	7	9.0971	6.96535e-08	4.17486e-06
ENSG00000107816.17	chr10	+	2	47.661	8.62119e-08	4.90266e-06
ENSG00000142192.21	chr21	-	2	47.4928	8.92161e-08	4.90266e-06
ENSG00000174282.12	chr17	-	2	47.4792	8.94646e-08	4.90266e-06
ENSG00000167244.21	chr11	-	4	16.1706	9.59625e-08	5.11267e-06
ENSG00000108107.15	chr19	+	2	46.5438	1.08389e-07	5.60885e-06
ENSG00000026025.16	chr10	+	3	23.4097	1.11124e-07	5.60885e-06
ENSG00000167658.16	chr19	-	3	23.2473	1.2031e-07	5.91676e-06
ENSG00000197182.14	chr22	+	3	23.111	1.28636e-07	6.1681e-06
ENSG00000145592.14	chr5	-	2	45.5699	1.32697e-07	6.20763e-06
ENSG00000162512.16	chr1	-	2	45.2309	1.42467e-07	6.50599e-06
ENSG00000051620.11	chr6	+	2	45.0374	1.48387e-07	6.61874e-06
ENSG00000111961.18	chr6	+	3	22.7341	1.54933e-07	6.75368e-06
ENSG00000211445.12	chr5	+	3	22.5562	1.69237e-07	7.21328e-06
ENSG00000113648.16	chr5	-	2	44.2056	1.76971e-07	7.37894e-06
ENSG00000118046.16	chr19	+	2	43.9384	1.87352e-07	7.64555e-06
ENSG00000065320.9	chr17	+	2	42.029	2.83319e-07	1.10922e-05
ENSG00000183955.13	chr12	+	2	42.0281	2.83376e-07	1.10922e-05
ENSG00000150938.10	chr2	+	2	41.7979	2.9809e-07	1.14347e-05
ENSG00000185650.10	chr14	-	2	41.5864	3.12324e-07	1.17458e-05
ENSG00000115594.12	chr2	+	3	21.2841	3.21631e-07	1.18632e-05
ENSG00000157216.16	chr1	-	2	41.2732	3.34744e-07	1.21103e-05
ENSG00000117298.16	chr1	-	3	21.1702	3.40959e-07	1.21103e-05
ENSG00000116685.16	chr1	-	2	41.0942	3.48325e-07	1.21211e-05
ENSG00000196712.18	chr17	+	2	41.0064	3.55192e-07	1.21211e-05
ENSG00000166681.14	chrX	+	2	40.9433	3.6022e-07	1.21211e-05
ENSG00000138326.21	chr10	+	2	40.5113	3.96754e-07	1.31202e-05
ENSG00000105373.19	chr19	+	3	20.6906	4.36764e-07	1.41985e-05
ENSG00000160216.21	chr21	+	3	20.5803	4.66213e-07	1.49033e-05
ENSG00000225663.8	chr17	-	2	39.5783	4.89792e-07	1.52523e-05
ENSG00000196628.20	chr18	-	6	9.2414	4.93034e-07	1.52523e-05
ENSG00000131711.15	chr5	+	2	39.3956	5.10593e-07	1.55447e-05
ENSG00000081923.15	chr18	-	2	39.2809	5.24127e-07	1.57074e-05
ENSG00000105401.9	chr19	-	2	39.0233	5.55947e-07	1.64047e-05
ENSG00000205542.11	chrX	+	2	38.1715	6.76625e-07	1.96631e-05
ENSG00000170558.10	chr18	-	2	38.016	7.09884e-07	2.00991e-05
ENSG00000240583.14	chr7	+	3	19.7579	7.12584e-07	2.00991e-05
ENSG00000168958.20	chr2	+	2	37.5418	7.83641e-07	2.17829e-05
ENSG00000020577.14	chr14	+	5	10.6638	8.09812e-07	2.21889e-05
ENSG00000100097.12	chr22	+	3	19.482	8.25327e-07	2.22954e-05
ENSG00000166710.21	chr15	+	2	37.03	8.8389e-07	2.35459e-05
ENSG00000172348.15	chr6	-	2	37.0056	9.11712e-07	2.39543e-05
ENSG00000135821.19	chr1	-	2	36.7364	9.47476e-07	2.45576e-05
ENSG00000100664.11	chr14	+	2	35.0338	1.42645e-06	3.64792e-05
ENSG00000198563.14	chr6	-	2	34.9409	1.45911e-06	3.68232e-05
ENSG00000051523.11	chr16	-	2	34.7884	1.51445e-06	3.7602e-05
ENSG00000136699.20	chr2	-	2	34.7489	1.52917e-06	3.7602e-05
ENSG00000106333.13	chr7	+	3	18.1457	1.70476e-06	4.1389e-05
ENSG00000143013.13	chr1	+	2	34.1926	1.78896e-06	4.28535e-05
ENSG00000115641.19	chr2	-	3	18.0638	1.80977e-06	4.28535e-05
ENSG00000142871.18	chr1	+	2	33.896	1.92985e-06	4.51397e-05
ENSG00000278189.1	chr21	+	2	33.7288	2.01139e-06	4.64017e-05
ENSG00000167522.16	chr16	-	2	33.5967	2.03219e-06	4.64017e-05
ENSG00000100364.19	chr22	-	2	33.455	2.10527e-06	4.75049e-05
ENSG00000069399.15	chr19	+	2	33.2665	2.20691e-06	4.91019e-05
ENSG00000166326.7	chr11	+	2	33.2299	2.22725e-06	4.91019e-05
ENSG00000140264.21	chr15	+	3	17.5416	2.38514e-06	5.19851e-05
ENSG00000088986.11	chr12	+	2	32.8391	2.45716e-06	5.29532e-05
ENSG00000159840.16	chr7	+	3	17.4036	2.57711e-06	5.49211e-05
ENSG00000142599.19	chr1	-	6	8.14261	2.67603e-06	5.64026e-05
ENSG00000121361.5	chr12	-	2	31.9733	3.06146e-06	6.29047e-05
ENSG00000123349.15	chr12	+	2	31.9593	3.07244e-06	6.29047e-05
ENSG00000085733.16	chr11	+	2	31.946	3.08292e-06	6.29047e-05
ENSG00000140416.23	chr15	+	7	6.94438	3.7099e-06	7.49009e-05
ENSG00000003402.20	chr2	+	4	11.7528	4.15336e-06	8.29806e-05
ENSG00000171033.13	chr8	+	2	30.2819	4.74782e-06	9.38796e-05
ENSG00000135390.21	chr12	-	3	16.2802	4.88988e-06	9.57019e-05
ENSG00000151414.15	chr1	+	2	30.1566	5.00465e-06	9.69587e-05
ENSG00000163171.8	chr2	-	2	29.982	5.13871e-06	9.85604e-05
ENSG00000136848.17	chr9	+	4	11.4664	5.34162e-06	0.000101438
ENSG00000156381.9	chr14	-	2	29.5706	5.73168e-06	0.000107778
ENSG00000125818.18	chr20	+	2	29.4607	5.90215e-06	0.000109323
ENSG00000112531.17	chr6	+	2	29.4444	5.92786e-06	0.000109323
ENSG00000135404.12	chr12	-	4	11.3414	5.98989e-06	0.000109415
ENSG00000132463.14	chr4	-	2	29.042	6.60261e-06	0.000118471
ENSG00000163660.12	chr3	-	2	29.0184	6.64462e-06	0.000118471
ENSG00000113140.11	chr5	-	2	29.0037	6.67095e-06	0.000118471
ENSG00000131759.18	chr17	+	3	15.5666	7.41714e-06	0.000130515
ENSG00000074181.9	chr19	-	2	28.4468	7.75478e-06	0.000135215
ENSG00000156414.19	chr14	+	2	28.2088	8.27382e-06	0.000142966
ENSG00000148180.21	chr9	+	6	7.40592	8.59996e-06	0.000147274
ENSG00000196535.17	chr17	-	2	27.8827	9.04602e-06	0.000152468
ENSG00000138606.19	chr15	-	2	27.8762	9.06224e-06	0.000152468
ENSG00000110955.9	chr12	-	3	15.2007	9.21155e-06	0.000153633
ENSG00000150636.17	chr18	+	2	27.5693	9.86064e-06	0.000163041
ENSG00000109846.9	chr11	-	4	10.776	1.01104e-05	0.000165742
ENSG00000012061.16	chr19	-	5	8.57903	1.05837e-05	0.00017203
ENSG00000106070.20	chr7	-	2	27.2608	1.07394e-05	0.000173093
ENSG00000198947.17	chrX	-	3	14.8772	1.11765e-05	0.000178637
ENSG00000138757.15	chr4	-	2	26.7105	1.25207e-05	0.000198469
ENSG00000186352.9	chr4	+	2	26.6383	1.27766e-05	0.000200865
ENSG00000183023.18	chr2	-	3	14.5579	1.35482e-05	0.000211263
ENSG00000102316.17	chrX	+	3	14.4828	1.41793e-05	0.000219322
ENSG00000054654.19	chr14	+	4	10.3585	1.50838e-05	0.000231446
ENSG00000055118.16	chr7	-	2	26.0005	1.52972e-05	0.000232858
ENSG00000132819.17	chr20	+	2	26.0148	1.54852e-05	0.000233863
ENSG00000198363.18	chr8	-	3	14.2966	1.58792e-05	0.00023794
ENSG00000008441.18	chr19	+	2	25.7268	1.65367e-05	0.000245759
ENSG00000175084.12	chr2	+	4	10.2494	1.66573e-05	0.000245759
ENSG00000134419.15	chr16	-	2	25.6306	1.69973e-05	0.000248861
ENSG00000114861.23	chr3	-	5	8.16646	1.79651e-05	0.000261038
ENSG00000136153.20	chr13	+	3	14.0664	1.82803e-05	0.000263621
ENSG00000069122.19	chr6	-	2	25.1765	1.93648e-05	0.000277177
ENSG00000103495.14	chr16	+	2	24.9415	2.07254e-05	0.000294454
ENSG00000041982.16	chr9	-	2	24.9665	2.08959e-05	0.000294694
ENSG00000128272.16	chr22	+	2	24.7531	2.18896e-05	0.000306454
ENSG00000186260.17	chr16	+	3	13.7472	2.22548e-05	0.000308065
ENSG00000166532.16	chr12	+	2	24.6853	2.23259e-05	0.000308065
ENSG00000099204.20	chr10	-	5	7.95542	2.36125e-05	0.000323492
ENSG00000100106.22	chr22	+	2	24.391	2.43283e-05	0.000330934
ENSG00000178104.19	chr1	+	3	13.3837	2.81681e-05	0.000380467
ENSG00000067182.8	chr12	-	2	23.663	3.01515e-05	0.00040441
ENSG00000122786.20	chr7	+	4	9.59878	3.09842e-05	0.000412692
ENSG00000064205.11	chr20	+	2	23.4723	3.19111e-05	0.000419364
ENSG00000145675.15	chr5	+	5	7.72426	3.19224e-05	0.000419364
ENSG00000070778.13	chr14	-	2	23.3285	3.33097e-05	0.000434612
ENSG00000156467.10	chr8	-	3	13.034	3.47596e-05	0.000447698
ENSG00000038382.20	chr5	+	3	13.0331	3.47795e-05	0.000447698
ENSG00000107317.13	chr9	+	3	13.0166	3.52896e-05	0.000450008
ENSG00000130255.13	chr19	+	2	23.1167	3.54903e-05	0.000450008
ENSG00000114738.11	chr3	+	2	23.1006	3.56628e-05	0.000450008
ENSG00000115998.8	chr2	-	2	22.5844	4.16715e-05	0.000522392
ENSG00000184007.22	chr1	-	3	12.6742	4.40607e-05	0.000548756
ENSG00000126226.22	chr13	-	2	22.342	4.48586e-05	0.000555089
ENSG00000087086.15	chr19	+	2	22.2597	4.5999e-05	0.000565552
ENSG00000134686.18	chr1	-	2	22.1638	4.73665e-05	0.000578656
ENSG00000087274.17	chr4	+	3	12.5136	4.84017e-05	0.00058756
ENSG00000143761.16	chr1	+	2	21.882	5.16425e-05	0.000622958
ENSG00000134775.15	chr18	+	2	21.7875	5.31668e-05	0.000635099
ENSG00000170290.4	chr11	-	2	21.8205	5.33112e-05	0.000635099
ENSG00000133083.15	chr13	-	3	12.3648	5.37061e-05	0.000635853
ENSG00000061938.20	chr3	-	2	21.6087	5.61833e-05	0.000658392
ENSG00000173171.15	chr1	+	2	21.6022	5.62963e-05	0.000658392
ENSG00000164713.10	chr7	+	3	12.2684	5.66704e-05	0.00065875
ENSG00000084070.12	chr1	+	2	21.5363	5.7457e-05	0.00066387
ENSG00000100906.11	chr14	-	2	21.5089	5.79457e-05	0.000665509
ENSG00000182149.21	chr16	+	2	21.4263	5.94507e-05	0.000678728
ENSG00000092969.12	chr1	+	2	21.2194	6.41962e-05	0.000726471
ENSG00000141447.18	chr18	-	2	21.1699	6.439e-05	0.000726471
ENSG00000085831.16	chr1	-	3	11.9925	6.77645e-05	0.00075791
ENSG00000204843.13	chr2	-	3	12.0003	6.79669e-05	0.00075791
ENSG00000138061.12	chr2	-	2	20.9388	7.00659e-05	0.000776801
ENSG00000151914.21	chr6	-	6	6.09177	7.37754e-05	0.000813225
ENSG00000125844.16	chr20	-	2	20.672	7.52747e-05	0.00082501
ENSG00000124225.16	chr20	-	2	20.5788	7.84515e-05	0.000854943
ENSG00000118785.14	chr4	+	2	20.5588	7.89478e-05	0.000855491
ENSG00000104824.18	chr19	-	2	20.4995	7.94914e-05	0.000855727
ENSG00000039523.20	chr16	+	2	20.4848	7.98619e-05	0.000855727
ENSG00000107372.13	chr9	-	2	20.4656	8.03469e-05	0.000856141
ENSG00000149925.22	chr16	+	4	8.61641	8.14725e-05	0.000863338
ENSG00000087095.13	chr17	+	2	20.3628	8.30097e-05	0.000874794
ENSG00000172638.13	chr11	-	3	11.6691	8.37171e-05	0.000877429
ENSG00000164587.13	chr5	-	3	11.6352	8.56062e-05	0.000892351
ENSG00000141562.18	chr17	+	2	20.1343	8.92706e-05	0.000921177
ENSG00000184840.12	chr5	+	2	20.1321	8.93321e-05	0.000921177
ENSG00000162458.13	chr1	+	2	20.0874	9.06145e-05	0.000929404
ENSG00000053747.17	chr18	+	3	11.5067	9.31671e-05	0.000950502
ENSG00000254772.10	chr11	-	2	19.5041	0.000109289	0.00110606
ENSG00000137573.14	chr8	+	2	19.5001	0.000110143	0.00110606
ENSG00000071655.18	chr19	-	2	19.4995	0.00011067	0.00110606
ENSG00000141867.19	chr19	-	2	19.4981	0.000110721	0.00110606
ENSG00000132510.11	chr17	+	3	11.2212	0.000112573	0.00111873
ENSG00000109016.17	chr17	+	2	19.3453	0.000115058	0.00113754
ENSG00000128567.17	chr7	-	2	19.2944	0.000116972	0.00115053
ENSG00000177565.18	chr3	-	2	19.2552	0.000118472	0.00115933
ENSG00000100242.15	chr22	-	3	11.0555	0.000125737	0.00122418
ENSG00000167460.17	chr19	+	3	10.9944	0.0001318	0.00127107
ENSG00000196313.11	chr7	+	2	18.9265	0.000131879	0.00127107
ENSG00000136156.15	chr13	+	3	10.9716	0.000133005	0.00127552
ENSG00000007237.19	chr17	-	4	8.11149	0.000136205	0.0012997
ENSG00000157540.22	chr21	+	2	18.7251	0.000140891	0.00133276
ENSG00000102265.12	chrX	+	3	10.8944	0.000141059	0.00133276
ENSG00000149932.17	chr16	+	2	18.6448	0.00014466	0.00136008
ENSG00000197063.11	chr17	-	2	18.6052	0.000146563	0.00137126
ENSG00000023171.18	chr11	+	3	10.7546	0.00015496	0.00144278
ENSG00000198467.16	chr9	-	4	7.91727	0.00016518	0.00153051
ENSG00000205268.11	chr8	-	2	18.1727	0.000169139	0.00155966
ENSG00000142676.14	chr1	+	2	18.138	0.000171102	0.00157021
ENSG00000083720.13	chr5	-	2	18.0356	0.000177048	0.00161704
ENSG00000141905.19	chr19	+	7	4.95467	0.000184218	0.00167455
ENSG00000080854.16	chr11	-	2	17.9013	0.00018554	0.00167862
ENSG00000170421.12	chr12	-	2	17.8478	0.000188529	0.00169765
ENSG00000104904.12	chr19	+	2	17.7375	0.00019564	0.00175345
ENSG00000231607.13	chr13	-	2	17.5563	0.000207957	0.00185517
ENSG00000140545.15	chr15	-	2	17.4921	0.000212512	0.00188703
ENSG00000011451.21	chr19	-	3	10.2477	0.000217269	0.00192038
ENSG00000205581.11	chr21	-	2	17.3426	0.000223547	0.0019625
ENSG00000008853.17	chr8	+	3	10.2023	0.000224144	0.0019625
ENSG00000111678.11	chr12	+	2	17.3222	0.000225105	0.0019625
ENSG00000169946.14	chr8	+	2	17.2713	0.000229022	0.00198762
ENSG00000145860.12	chr5	-	2	17.1931	0.000235197	0.00203202
ENSG00000172765.17	chr3	-	2	17.1071	0.000243208	0.00209181
ENSG00000118194.20	chr1	-	7	4.81361	0.000245341	0.00210073
ENSG00000114480.13	chr3	-	2	17.0585	0.000248511	0.00211842
ENSG00000177830.18	chr11	-	2	16.8014	0.000268903	0.00228211
ENSG00000153250.20	chr2	-	3	9.92635	0.000271114	0.00229073
ENSG00000075413.19	chr14	+	2	16.7822	0.000273119	0.00229755
ENSG00000162595.7	chr1	-	2	16.7421	0.000276898	0.00231484
ENSG00000223865.11	chr6	+	2	16.7089	0.000277588	0.00231484
ENSG00000004478.8	chr12	+	2	16.6054	0.000287672	0.00238855
ENSG00000131873.7	chr15	-	2	16.5078	0.00029754	0.00245983
ENSG00000115053.17	chr2	-	3	9.77932	0.000300234	0.00247146
ENSG00000177426.22	chr18	+	3	9.76961	0.000302269	0.00247757
ENSG00000163820.15	chr3	-	2	16.4434	0.000304238	0.0024831
ENSG00000182963.11	chr17	-	2	16.396	0.000309275	0.00251352
ENSG00000125398.8	chr17	+	2	16.3824	0.000313448	0.00253668
ENSG00000136574.18	chr8	+	3	9.68283	0.000321108	0.00258775
ENSG00000065054.14	chr16	+	3	9.66206	0.000325794	0.00261332
ENSG00000185201.17	chr11	+	2	16.2356	0.000327005	0.00261332
ENSG00000073536.18	chr17	-	2	16.2429	0.000328982	0.0026182
ENSG00000159023.22	chr1	+	2	16.1755	0.000333922	0.00264654
ENSG00000137801.11	chr15	+	2	16.1626	0.000338291	0.00267013
ENSG00000164741.15	chr8	-	3	9.57163	0.000347054	0.00271718
ENSG00000179833.4	chr2	-	2	16.0647	0.000347085	0.00271718
ENSG00000005882.12	chr17	+	2	16.0073	0.000354121	0.00276099
ENSG00000175920.18	chr4	+	2	15.9922	0.000358999	0.00278769
ENSG00000145431.11	chr4	-	2	15.8998	0.000367718	0.00283287
ENSG00000075624.17	chr7	-	2	15.8994	0.000367771	0.00283287
ENSG00000182196.13	chr12	+	2	15.7308	0.000390232	0.00298442
ENSG00000066629.18	chr14	+	2	15.7242	0.000391134	0.00298442
ENSG00000126217.21	chr13	+	2	15.7141	0.000392532	0.00298442
ENSG00000087460.28	chr20	+	5	5.86268	0.00039367	0.00298442
ENSG00000105321.14	chr19	+	2	15.6803	0.000397231	0.00299957
ENSG00000135956.9	chr2	-	2	15.6561	0.000400646	0.00301349
ENSG00000160691.19	chr1	-	2	15.563	0.000417382	0.0031271
ENSG00000048052.23	chr7	+	4	6.99066	0.000432091	0.00322471
ENSG00000141971.13	chr19	+	2	15.3578	0.000445296	0.00331038
ENSG00000130158.14	chr19	-	2	15.3418	0.000447834	0.00331639
ENSG00000075240.17	chr22	+	2	15.2627	0.000460611	0.00339789
ENSG00000100201.23	chr22	-	2	15.2216	0.000467414	0.00343486
ENSG00000090621.15	chr1	-	2	15.1992	0.000471174	0.00343825
ENSG00000075292.19	chr2	+	2	15.1975	0.00047146	0.00343825
ENSG00000196498.13	chr12	-	4	6.90052	0.000475195	0.00345236
ENSG00000170345.10	chr14	+	2	14.9988	0.000510061	0.00369169
ENSG00000226306.6	chr5	+	2	14.9302	0.000518813	0.0037281
ENSG00000133401.16	chr5	+	2	14.9246	0.000519861	0.0037281
ENSG00000151276.23	chr3	-	2	14.9189	0.000520923	0.0037281
ENSG00000178127.13	chr18	+	3	8.95097	0.000540954	0.00385706
ENSG00000175334.8	chr11	+	2	14.7833	0.000546971	0.00388552
ENSG00000148120.17	chr9	+	3	8.84914	0.000578854	0.00409683
ENSG00000172845.17	chr2	-	3	8.84222	0.000581734	0.00410208
ENSG00000152700.14	chr5	-	2	14.5283	0.000599828	0.00421418
ENSG00000243678.12	chr17	+	2	14.4545	0.000618154	0.00432062
ENSG00000122406.14	chr1	+	2	14.4395	0.000619485	0.00432062
ENSG00000073910.23	chr13	+	5	5.52346	0.000631615	0.00438927
ENSG00000147684.10	chr8	+	2	14.3581	0.000638111	0.00441211
ENSG00000087266.17	chr4	+	2	14.3522	0.000639503	0.00441211
ENSG00000124831.19	chr2	+	3	8.68998	0.000650792	0.00447391
ENSG00000138185.20	chr10	+	2	14.2851	0.000655346	0.00448912
ENSG00000167468.18	chr19	+	2	14.2098	0.000673635	0.00459798
ENSG00000173372.17	chr1	+	2	14.1658	0.000684558	0.00465596
ENSG00000162433.15	chr1	+	3	8.6081	0.000688397	0.00466138
ENSG00000068305.17	chr15	+	2	14.1434	0.000690214	0.00466138
ENSG00000112096.19	chr6	-	3	8.58754	0.000702036	0.00472458
ENSG00000084234.18	chr11	+	3	8.53789	0.000724223	0.00485685
ENSG00000178980.15	chr19	+	2	13.9568	0.000739161	0.00493976
ENSG00000117595.12	chr1	-	2	13.9606	0.000743223	0.00494966
ENSG00000159403.18	chr12	-	2	13.9289	0.000746813	0.00495636
ENSG00000163485.17	chr1	+	2	13.7774	0.000789763	0.00522333
ENSG00000136068.15	chr3	+	2	13.7089	0.000810049	0.00533909
ENSG00000172889.16	chr9	+	3	8.36841	0.000818971	0.00537941
ENSG00000198589.14	chr4	-	2	13.597	0.0008444	0.0055275
ENSG00000177685.17	chr11	+	2	13.4561	0.000889854	0.00580524
ENSG00000172403.11	chr4	+	2	13.4517	0.000897137	0.00583291
ENSG00000159069.14	chr9	-	2	13.3214	0.000935778	0.00605722
ENSG00000239523.6	chr3	+	2	13.3152	0.000937954	0.00605722
ENSG00000065882.16	chr4	+	2	13.2583	0.000958187	0.00616712
ENSG00000222041.11	chr2	+	2	13.1291	0.00100581	0.00645197
ENSG00000178209.16	chr8	-	7	4.11001	0.00102133	0.00652231
ENSG00000159267.16	chr21	-	2	13.0826	0.00102357	0.00652231
ENSG00000104964.15	chr19	-	2	13.0304	0.00104391	0.00662988
ENSG00000167994.13	chr11	-	2	12.881	0.00110458	0.00699204
ENSG00000078246.17	chr12	+	2	12.7739	0.00115036	0.00721412
ENSG00000127824.14	chr2	-	2	12.7828	0.00115342	0.00721412
ENSG00000167792.13	chr11	+	3	7.90114	0.00115353	0.00721412
ENSG00000198125.13	chr22	-	5	5.09366	0.00115528	0.00721412
ENSG00000177119.17	chr12	+	2	12.771	0.00115859	0.00721412
ENSG00000022840.16	chr12	+	3	7.89097	0.00116223	0.00721412
ENSG00000160877.6	chr19	+	2	12.6979	0.00119118	0.00736995
ENSG00000076555.15	chr12	+	4	6.03081	0.00120822	0.00744027
ENSG00000275832.5	chr17	+	3	7.83617	0.0012103	0.00744027
ENSG00000136100.14	chr13	-	2	12.6276	0.00121621	0.00745271
ENSG00000169926.11	chr15	+	2	12.4815	0.00128602	0.0078449
ENSG00000164708.6	chr7	-	2	12.492	0.0012884	0.0078449
ENSG00000105974.13	chr7	+	2	12.4682	0.00129257	0.00784544
ENSG00000142541.18	chr19	+	2	12.4418	0.00130571	0.00785123
ENSG00000143226.15	chr1	+	2	12.457	0.00130573	0.00785123
ENSG00000005302.19	chrX	+	2	12.4416	0.00130581	0.00785123
ENSG00000177885.15	chr17	-	2	12.3995	0.00132708	0.00795419
ENSG00000197746.14	chr10	-	3	7.70471	0.0013343	0.00797252
ENSG00000137936.18	chr1	-	2	12.3592	0.00134779	0.00802815
ENSG00000108852.15	chr17	-	2	12.3232	0.00136655	0.00811381
ENSG00000107669.18	chr10	-	2	12.3154	0.00137063	0.00811381
ENSG00000187079.20	chr11	+	2	12.2908	0.00138731	0.00812818
ENSG00000171681.12	chr12	+	2	12.275	0.0013921	0.00812818
ENSG00000086015.22	chr1	+	2	12.2711	0.00139423	0.00812818
ENSG00000185022.12	chr22	+	2	12.2849	0.00139474	0.00812818
ENSG00000010278.15	chr12	+	2	12.2636	0.00139823	0.00812818
ENSG00000071575.11	chr2	+	2	12.2632	0.00139849	0.00812818
ENSG00000182093.16	chr21	+	2	12.1534	0.00145894	0.00843337
ENSG00000055163.20	chr5	+	2	12.1519	0.00145979	0.00843337
ENSG00000204267.16	chr6	-	2	12.1399	0.00146659	0.00844721
ENSG00000172354.10	chr7	+	2	12.1067	0.00148551	0.00853054
ENSG00000219626.9	chr2	+	2	12.0482	0.00151954	0.00869991
ENSG00000169813.16	chr10	-	3	7.52548	0.00152511	0.00870582
ENSG00000102531.16	chr13	+	3	7.51044	0.00154236	0.00877817
ENSG00000115685.15	chr2	+	2	11.9888	0.00155497	0.00882377
ENSG00000224861.1	chr14	-	2	11.9808	0.00155981	0.00882509
ENSG00000204138.13	chr1	+	2	11.8933	0.00161374	0.00910342
ENSG00000203879.12	chrX	+	3	7.43403	0.00163325	0.00918644
ENSG00000132475.10	chr17	-	3	7.37972	0.00170123	0.00951743
ENSG00000109670.16	chr4	-	3	7.3791	0.00170202	0.00951743
ENSG00000077009.13	chr19	+	3	7.37536	0.00171317	0.00955194
ENSG00000187954.13	chr8	-	2	11.726	0.00172257	0.00957647
ENSG00000126246.10	chr19	-	2	11.7099	0.00173345	0.009587
ENSG00000115159.16	chr2	+	2	11.7029	0.00173819	0.009587
ENSG00000134954.14	chr11	-	2	11.701	0.00173945	0.009587
ENSG00000164125.16	chr4	-	2	11.6993	0.00174605	0.00959579
ENSG00000089225.20	chr12	-	4	5.67771	0.00177453	0.00967904
ENSG00000173221.14	chr5	-	2	11.6497	0.00177475	0.00967904
ENSG00000130940.15	chr1	-	2	11.6553	0.00177634	0.00967904
ENSG00000100412.17	chr22	+	2	11.6157	0.00179853	0.00977217
ENSG00000072210.19	chr17	+	2	11.5734	0.00182867	0.00989467
ENSG00000188176.12	chr17	+	2	11.5784	0.00183139	0.00989467
ENSG00000113742.14	chr5	+	4	5.63567	0.00185847	0.0100128
ENSG00000105323.17	chr19	+	2	11.512	0.00187327	0.0100643
ENSG00000040341.18	chr8	-	2	11.4944	0.0018863	0.0101059
ENSG00000186439.14	chr6	-	2	11.4735	0.00191054	0.0102073
ENSG00000008056.14	chrX	-	2	11.4162	0.0019453	0.0103641
ENSG00000062716.13	chr17	+	2	11.3079	0.00203035	0.0107839
ENSG00000128951.14	chr15	+	2	11.3017	0.00203533	0.0107839
ENSG00000245532.9	chr11	+	2	11.2906	0.00204432	0.0108017
ENSG00000173175.15	chr3	-	3	7.10905	0.00208702	0.010997
ENSG00000141759.15	chr18	-	2	11.2218	0.00210076	0.011039
ENSG00000174197.16	chr15	+	2	11.1887	0.00212853	0.0111544
ENSG00000132530.17	chr17	+	2	11.1698	0.00214463	0.0112082
ENSG00000160801.14	chr3	+	2	11.1477	0.00216351	0.0112761
ENSG00000112541.18	chr6	-	4	5.48511	0.00219411	0.0114046
ENSG00000169756.16	chr2	+	3	7.02658	0.00222195	0.0115181
ENSG00000170485.17	chr2	+	2	11.072	0.00222969	0.011519
ENSG00000244687.12	chr20	-	2	11.067	0.00223413	0.011519
ENSG00000147526.20	chr8	+	3	6.99976	0.00226777	0.0116611
ENSG00000142156.15	chr21	+	2	11.0186	0.00227762	0.0116652
ENSG00000178882.15	chr12	+	2	11.0152	0.00228073	0.0116652
ENSG00000103034.14	chr16	+	4	5.43807	0.0023113	0.0117901
ENSG00000152689.18	chr2	+	3	6.9646	0.00232933	0.0118505
ENSG00000109381.20	chr4	-	2	10.9234	0.00236588	0.011975
ENSG00000204084.13	chr1	-	2	10.923	0.00236629	0.011975
ENSG00000156298.13	chrX	+	2	10.9186	0.00237558	0.0119904
ENSG00000101276.18	chr20	-	2	10.9053	0.0023831	0.0119968
ENSG00000119383.21	chr9	+	3	6.92756	0.00240412	0.0120709
ENSG00000102317.18	chrX	+	2	10.8547	0.00243185	0.0121783
ENSG00000132646.11	chr20	-	2	10.8196	0.00246639	0.0123191
ENSG00000232119.8	chrX	+	2	10.8042	0.00248166	0.0123632
ENSG00000135636.14	chr2	+	2	10.7647	0.00252131	0.0125282
ENSG00000076242.16	chr3	+	2	10.7288	0.00255795	0.0126774
ENSG00000149115.14	chr11	-	3	6.81134	0.00261881	0.0129297
ENSG00000248923.1	chr5	-	2	10.674	0.00262716	0.0129297
ENSG00000139112.11	chr12	+	3	6.80624	0.00262908	0.0129297
ENSG00000197530.12	chr1	+	2	10.627	0.00266513	0.0130735
ENSG00000104951.16	chr19	-	2	10.6007	0.00269356	0.0131792
ENSG00000160194.18	chr21	+	2	10.5778	0.00271854	0.0132676
ENSG00000173451.7	chr12	+	2	10.5227	0.00277984	0.0135323
ENSG00000082397.18	chr18	-	2	10.5102	0.00279392	0.0135664
ENSG00000004776.13	chr19	-	2	10.4657	0.00285754	0.0138403
ENSG00000108848.16	chr17	+	3	6.6758	0.00290615	0.0140019
ENSG00000129116.19	chr4	+	3	6.67752	0.00291146	0.0140019
ENSG00000120278.16	chr6	+	2	10.4075	0.0029128	0.0140019
ENSG00000148450.13	chr10	+	2	10.3278	0.00300877	0.0144271
ENSG00000172270.22	chr19	+	5	4.41673	0.00304277	0.0145537
ENSG00000104529.17	chr8	-	2	10.2754	0.00307364	0.01463
ENSG00000141540.11	chr17	+	2	10.2752	0.00307397	0.01463
ENSG00000111341.10	chr12	-	2	10.2636	0.00308848	0.0146332
ENSG00000071082.11	chr2	+	2	10.2625	0.0030899	0.0146332
ENSG00000196531.14	chr12	-	3	6.59203	0.00310004	0.014645
ENSG00000122378.14	chr10	+	2	10.2103	0.00317007	0.014939
ENSG00000088808.18	chr14	-	2	10.1496	0.00323572	0.015211
ENSG00000114473.14	chr3	-	3	6.52782	0.00326767	0.0152919
ENSG00000105227.16	chr19	-	2	10.1352	0.00326886	0.0152919
ENSG00000145730.20	chr5	+	6	3.87587	0.00329651	0.0153837
ENSG00000185532.20	chr10	+	2	10.0601	0.00335666	0.0156264
ENSG00000168883.20	chr2	+	2	10.0299	0.00339864	0.0157835
ENSG00000179604.10	chr17	-	2	9.99152	0.00345264	0.0159843
ENSG00000171680.23	chr1	-	2	9.98737	0.00345854	0.0159843
ENSG00000153187.20	chr1	-	4	5.07198	0.00347417	0.0160179
ENSG00000172239.14	chr5	-	2	9.96979	0.00348365	0.0160231
ENSG00000105379.10	chr19	-	2	9.96394	0.00349204	0.0160233
ENSG00000170776.22	chr15	+	4	5.05305	0.00354857	0.0162438
ENSG00000213465.8	chr11	+	2	9.84613	0.00366592	0.0167341
ENSG00000102804.15	chr13	-	4	5.02227	0.00367313	0.0167341
ENSG00000008324.12	chr3	+	2	9.81946	0.00370656	0.0168464
ENSG00000134369.15	chr1	+	2	9.81604	0.00371869	0.0168616
ENSG00000115306.16	chr2	+	3	6.34818	0.00374527	0.0169179
ENSG00000205133.12	chr8	-	2	9.80192	0.00374875	0.0169179
ENSG00000155755.19	chr2	-	2	9.75973	0.00379934	0.017106
ENSG00000149273.15	chr11	+	2	9.73057	0.00384555	0.0172735
ENSG00000138413.14	chr2	-	2	9.72263	0.00385824	0.01729
ENSG00000143153.13	chr1	+	2	9.68161	0.00392448	0.0175458
ENSG00000101246.20	chr20	-	2	9.64312	0.00398777	0.0177873
ENSG00000121769.8	chr1	-	2	9.42132	0.00437449	0.0194515
ENSG00000182809.11	chr14	+	3	6.1475	0.00438116	0.0194515
ENSG00000134982.17	chr5	+	2	9.4052	0.00440411	0.0195083
ENSG00000249464.6	chr4	+	2	9.40758	0.00441654	0.0195183
ENSG00000120333.4	chr1	-	2	9.35774	0.00449264	0.0197758
ENSG00000130822.16	chrX	-	2	9.35625	0.00449544	0.0197758
ENSG00000106823.12	chr9	-	2	9.30166	0.00459971	0.0201882
ENSG00000065427.15	chr16	-	2	9.28435	0.00463331	0.0202892
ENSG00000099991.18	chr22	+	2	9.26598	0.00466926	0.0204001
ENSG00000165119.21	chr9	-	2	9.25103	0.00469874	0.0204822
ENSG00000275215.1	chr21	+	2	9.21242	0.0047758	0.0207709
ENSG00000163565.19	chr1	+	4	4.78674	0.00478775	0.0207758
ENSG00000228474.6	chr2	-	2	9.15757	0.00488762	0.0211416
ENSG00000168542.16	chr2	+	2	9.16311	0.0048941	0.0211416
ENSG00000265972.6	chr1	-	2	9.13757	0.00492908	0.0212449
ENSG00000102606.18	chr13	+	4	4.7469	0.00500818	0.0215374
ENSG00000068724.17	chr2	+	2	9.05937	0.00510566	0.0219075
ENSG00000186104.11	chr11	-	2	9.01597	0.00518953	0.0222177
ENSG00000132005.9	chr19	-	2	8.99989	0.00522505	0.0223199
ENSG00000124942.14	chr11	-	3	5.89488	0.00534571	0.0227846
ENSG00000213741.11	chr14	-	2	8.94053	0.00535853	0.0227886
ENSG00000182326.15	chr12	+	2	8.91954	0.00540659	0.0229421
ENSG00000125520.14	chr20	+	3	5.85386	0.00553609	0.0234398
ENSG00000131370.16	chr3	-	2	8.8293	0.00561861	0.0237368
ENSG00000109390.13	chr4	-	3	5.80906	0.00572187	0.0241199
ENSG00000275915.1	chr1	+	2	8.77512	0.00575021	0.0241823
ENSG00000103091.15	chr16	-	2	8.77037	0.0057619	0.0241823
ENSG00000115602.17	chr2	+	2	8.77003	0.00578253	0.0242159
ENSG00000155366.17	chr1	-	2	8.74251	0.005831	0.0243657
ENSG00000132334.17	chr10	+	3	5.72737	0.00610567	0.025458
ENSG00000188343.13	chr8	+	2	8.62644	0.00612865	0.0254984
ENSG00000180879.14	chrX	+	2	8.60042	0.0061976	0.0257294
ENSG00000186184.19	chr13	+	2	8.58696	0.00623359	0.0257945
ENSG00000172530.20	chr16	+	2	8.58451	0.00624018	0.0257945
ENSG00000166974.13	chr18	+	2	8.5576	0.00631291	0.0260391
ENSG00000178982.10	chr19	+	2	8.51658	0.00642554	0.0264443
ENSG00000156256.15	chr21	+	2	8.51182	0.00643873	0.0264443
ENSG00000133065.11	chr1	-	2	8.51004	0.00646482	0.0264947
ENSG00000019144.19	chr11	+	4	4.51749	0.00649678	0.0265689
ENSG00000265107.3	chr1	-	2	8.49173	0.00651604	0.026591
ENSG00000166949.17	chr15	+	2	8.46524	0.00656954	0.0267524
ENSG00000100605.17	chr14	-	2	8.45912	0.00658694	0.0267664
ENSG00000167641.11	chr19	-	2	8.43086	0.00666795	0.0270383
ENSG00000089693.11	chr12	-	4	4.49279	0.00668212	0.0270386
ENSG00000116044.16	chr2	-	2	8.38154	0.00681188	0.0274773
ENSG00000080189.15	chr20	-	2	8.37519	0.00683063	0.0274773
ENSG00000185088.14	chr15	-	2	8.37422	0.00683352	0.0274773
ENSG00000073849.16	chr3	+	3	5.56793	0.00693429	0.0278144
ENSG00000076770.14	chrX	-	2	8.34378	0.00694635	0.0278144
ENSG00000173812.11	chr17	+	2	8.31486	0.0070118	0.028018
ENSG00000185033.14	chr15	+	2	8.29402	0.00707559	0.0282141
ENSG00000175505.11	chr11	-	2	8.29371	0.00709884	0.0282481
ENSG00000115310.18	chr2	-	3	5.53673	0.00712602	0.0282975
ENSG00000179820.16	chr19	+	2	8.26659	0.00718294	0.0284646
ENSG00000152556.17	chr12	+	5	3.82088	0.00721673	0.0285396
ENSG00000099875.16	chr19	-	2	8.20736	0.0073704	0.0290873
ENSG00000092931.11	chr17	+	2	8.19425	0.00738972	0.0291037
ENSG00000109971.14	chr11	-	3	5.47515	0.00746982	0.0293174
ENSG00000138835.22	chr9	+	6	3.40968	0.00747481	0.0293174
ENSG00000143799.14	chr1	-	2	8.16341	0.00748986	0.0293174
ENSG00000113645.15	chr5	+	2	8.16246	0.00751602	0.0293599
ENSG00000158169.13	chr9	-	2	8.12417	0.00761937	0.0297031
ENSG00000146592.17	chr7	+	2	8.10023	0.00769957	0.0299032
ENSG00000126709.16	chr1	-	2	8.09955	0.00770186	0.0299032
ENSG00000171853.16	chr2	+	3	5.43487	0.00773269	0.0299622
ENSG00000095637.22	chr10	-	2	8.06064	0.00783424	0.0302841
ENSG00000166483.12	chr11	+	2	8.0637	0.00784734	0.0302841
ENSG00000158856.18	chr8	+	4	4.32985	0.00804816	0.0309581
ENSG00000092964.18	chr8	+	2	7.99749	0.00805428	0.0309581
ENSG00000223969.6	chr7	-	2	7.94085	0.00825734	0.0316752
ENSG00000145362.20	chr4	+	5	3.71495	0.00841371	0.0322106
ENSG00000105647.19	chr19	+	3	5.30134	0.0085926	0.0328299
ENSG00000163872.16	chr3	+	2	7.84101	0.00862887	0.0328673
ENSG00000177666.17	chr11	+	2	7.83897	0.00863666	0.0328673
ENSG00000186716.21	chr22	+	2	7.82637	0.00868487	0.0329853
ENSG00000258289.9	chr14	+	2	7.81515	0.00872802	0.0330368
ENSG00000213853.10	chr16	-	2	7.81389	0.00873288	0.0330368
ENSG00000004799.8	chr7	-	3	5.26157	0.00889205	0.0335727
ENSG00000168575.10	chr8	-	2	7.70891	0.00917425	0.0345701
ENSG00000112936.19	chr5	+	4	4.20456	0.00929119	0.0348955
ENSG00000136942.15	chr9	-	3	5.20402	0.00929699	0.0348955
ENSG00000162616.9	chr1	+	2	7.63629	0.00944844	0.0353948
ENSG00000160180.16	chr21	-	2	7.6209	0.00951337	0.0355685
ENSG00000172572.7	chr12	+	2	7.56106	0.00977045	0.0364586
ENSG00000198034.11	chrX	-	2	7.48842	0.0100927	0.0375513
ENSG00000105993.15	chr7	+	2	7.48059	0.0101281	0.0375513
ENSG00000119699.8	chr14	-	2	7.47963	0.0101324	0.0375513
ENSG00000104635.15	chr8	+	2	7.48112	0.0101416	0.0375513
ENSG00000134294.14	chr12	-	2	7.43704	0.0103275	0.0381009
ENSG00000129657.16	chr17	+	3	5.07445	0.0103298	0.0381009
ENSG00000110422.12	chr11	+	2	7.43066	0.0103571	0.0381285
ENSG00000135250.17	chr7	-	3	5.06323	0.0104246	0.0383036
ENSG00000074266.22	chr11	+	2	7.39368	0.0105303	0.0385743
ENSG00000109332.20	chr4	-	3	5.04981	0.0105393	0.0385743
ENSG00000119314.16	chr9	-	2	7.38769	0.0105586	0.0385743
ENSG00000170027.7	chr7	-	2	7.37498	0.0106191	0.0387213
ENSG00000144824.21	chr3	+	4	4.08272	0.0107046	0.0389591
ENSG00000143322.21	chr1	-	2	7.32906	0.0108534	0.0394258
ENSG00000136986.10	chr8	-	2	7.31803	0.0109228	0.0396029
ENSG00000133313.15	chr18	+	2	7.28883	0.0110387	0.0399476
ENSG00000100320.23	chr22	-	2	7.28207	0.0110724	0.039994
ENSG00000134371.14	chr1	+	2	7.23656	0.011302	0.0407467
ENSG00000049759.20	chr18	+	2	7.22067	0.0114124	0.0410676
ENSG00000134326.12	chr2	-	2	7.19296	0.0115269	0.0414017
ENSG00000164953.16	chr8	+	2	7.16811	0.0116572	0.0417916
ENSG00000079215.15	chr5	+	3	4.92289	0.0116917	0.0418369
ENSG00000143344.16	chr1	+	2	7.15684	0.0117168	0.041849
ENSG00000134884.15	chr13	-	2	7.14438	0.0117831	0.0420075
ENSG00000090006.18	chr19	+	3	4.90338	0.0118801	0.0422747
ENSG00000058668.15	chr1	+	2	7.10304	0.0120061	0.0426439
ENSG00000143321.19	chr1	-	3	4.88584	0.0120522	0.0427286
ENSG00000145012.13	chr3	+	3	4.8765	0.0121673	0.0430569
ENSG00000129084.18	chr11	-	2	7.06486	0.012216	0.0431498
ENSG00000136167.15	chr13	-	2	7.05999	0.0122431	0.043166
ENSG00000138772.13	chr4	+	2	7.03786	0.0123669	0.0435215
ENSG00000068028.17	chr3	-	2	7.03255	0.0123968	0.0435215
ENSG00000136603.14	chr3	+	2	7.02986	0.012412	0.0435215
ENSG00000147573.17	chr8	+	2	6.99411	0.0126157	0.0441124
ENSG00000121281.13	chr16	+	3	4.82697	0.0126493	0.0441124
ENSG00000187098.17	chr3	+	3	4.82696	0.0126495	0.0441124
ENSG00000101752.12	chr18	+	3	4.79401	0.0129971	0.0452421
ENSG00000134905.17	chr13	-	2	6.92089	0.0130443	0.0453241
ENSG00000099917.17	chr22	+	3	4.78235	0.0131225	0.0455136
ENSG00000151835.16	chr13	-	2	6.90229	0.0131557	0.0455461
ENSG00000129991.13	chr19	-	2	6.89975	0.0132022	0.0456248
ENSG00000168916.15	chr5	-	3	4.77126	0.0132429	0.0456832
ENSG00000151150.22	chr10	-	4	3.8891	0.0133679	0.0460316
ENSG00000149591.17	chr11	+	2	6.83677	0.0135707	0.0466463
ENSG00000140743.8	chr16	-	2	6.8278	0.0136121	0.046705
ENSG00000132676.16	chr1	+	2	6.82044	0.0136581	0.0467093
ENSG00000075234.17	chr22	+	2	6.81981	0.0136621	0.0467093
ENSG00000213160.10	chr2	+	2	6.76203	0.0140295	0.047799
ENSG00000105220.17	chr19	+	3	4.70123	0.0140307	0.047799
ENSG00000189337.17	chr1	+	2	6.75511	0.0140742	0.0478622
ENSG00000143951.16	chr2	-	3	4.65281	0.0146284	0.049659
ENSG00000064932.16	chr19	-	3	4.64004	0.014759	0.0500136
ENSG00000153048.11	chr16	-	2	6.63518	0.0148741	0.0503149
ENSG00000160392.13	chr19	-	2	6.60764	0.0150647	0.05087
ENSG00000132471.12	chr17	-	2	6.60226	0.0151023	0.0509071
ENSG00000120896.13	chr8	+	3	4.59884	0.0152715	0.0513872
ENSG00000137501.17	chr11	-	2	6.57059	0.0153253	0.051478
ENSG00000179010.15	chr4	+	2	6.53326	0.0155929	0.0522851
ENSG00000267577.1	chr19	+	2	6.51385	0.0157681	0.0527513
ENSG00000116132.12	chr1	+	3	4.55885	0.0157869	0.0527513
ENSG00000142875.19	chr1	+	2	6.49321	0.0158855	0.0529886
ENSG00000101040.19	chr20	-	2	6.48416	0.0159525	0.0531195
ENSG00000204257.15	chr6	-	2	6.46991	0.016093	0.0532977
ENSG00000168071.22	chr11	+	2	6.46487	0.0160962	0.0532977
ENSG00000180628.15	chr10	+	2	6.46483	0.0160965	0.0532977
ENSG00000183255.12	chr21	-	2	6.46172	0.0161198	0.0532977
ENSG00000151067.22	chr12	+	2	6.46107	0.0161449	0.0532977
ENSG00000166317.12	chr10	-	2	6.45475	0.0162069	0.0534103
ENSG00000143198.13	chr1	+	3	4.52472	0.016241	0.0534309
ENSG00000196526.10	chr4	-	2	6.42852	0.016371	0.0537663
ENSG00000075391.17	chr1	+	2	6.40752	0.016532	0.0542023
ENSG00000104805.16	chr19	+	3	4.49745	0.0166137	0.0543773
ENSG00000101940.18	chrX	+	2	6.38649	0.0167259	0.0546514
ENSG00000137764.20	chr15	+	2	6.32384	0.0172266	0.0561916
ENSG00000116871.15	chr1	+	2	6.31052	0.0172985	0.0563301
ENSG00000141524.17	chr17	-	2	6.30326	0.0173932	0.0565427
ENSG00000196652.12	chr7	+	2	6.28056	0.017543	0.0567543
ENSG00000130429.15	chr7	+	2	6.27896	0.0175561	0.0567543
ENSG00000139644.13	chr12	+	2	6.27886	0.017557	0.0567543
ENSG00000105697.9	chr19	+	2	6.28084	0.0175767	0.0567543
ENSG00000136950.13	chr9	+	2	6.27275	0.0176073	0.0567577
ENSG00000131016.17	chr6	+	3	4.4166	0.0177994	0.0572808
ENSG00000014641.21	chr2	+	2	6.22111	0.0180393	0.0579211
ENSG00000178951.9	chr19	-	2	6.21881	0.0180588	0.0579211
ENSG00000163092.21	chr2	+	2	6.21324	0.0181427	0.058093
ENSG00000108389.9	chr17	-	2	6.18899	0.0183506	0.0586607
ENSG00000172824.16	chr16	+	2	6.18173	0.0184133	0.0587432
ENSG00000074416.14	chr3	-	2	6.17429	0.018441	0.0587432
ENSG00000137070.18	chr9	+	2	6.16783	0.0184972	0.0587432
ENSG00000004059.11	chr7	+	2	6.16755	0.0184996	0.0587432
ENSG00000270647.6	chr17	+	2	6.16412	0.0185295	0.0587432
ENSG00000143947.15	chr2	+	2	6.14739	0.0186762	0.0591105
ENSG00000196924.19	chrX	-	3	4.34736	0.0188312	0.0595028
ENSG00000179409.11	chr17	-	2	6.09435	0.0191495	0.0604092
ENSG00000160014.17	chr19	+	2	6.0898	0.0191907	0.0604396
ENSG00000105193.9	chr19	-	2	6.08719	0.0192315	0.0604687
ENSG00000168385.18	chr2	+	2	6.06242	0.0194407	0.0609329
ENSG00000159251.8	chr15	-	4	3.56749	0.0194426	0.0609329
ENSG00000116171.19	chr1	+	2	6.05499	0.0195092	0.0610417
ENSG00000156265.16	chr21	+	2	6.0415	0.0196721	0.0614514
ENSG00000086200.17	chr5	+	2	6.02125	0.0198234	0.0618232
ENSG00000108924.14	chr17	+	3	4.27453	0.0200165	0.0623241
ENSG00000161013.17	chr5	-	2	5.98566	0.0201608	0.0626716
ENSG00000173641.18	chr1	-	2	5.97973	0.0202561	0.0627961
ENSG00000198053.12	chr20	+	2	5.97866	0.0202663	0.0627961
ENSG00000099797.15	chr19	+	2	5.96813	0.0203293	0.0628897
ENSG00000048740.18	chr10	+	3	4.24891	0.0204653	0.0632083
ENSG00000104870.13	chr19	+	2	5.94456	0.0205582	0.0633934
ENSG00000147140.17	chrX	+	2	5.93883	0.0206143	0.0634643
ENSG00000072778.20	chr17	+	4	3.51356	0.0206928	0.063604
ENSG00000129422.14	chr8	-	3	4.21619	0.0210521	0.0646045
ENSG00000103994.18	chr15	-	3	4.19758	0.021354	0.065403
ENSG00000185787.15	chr15	+	2	5.86029	0.0214002	0.065403
ENSG00000083845.9	chr19	+	2	5.85888	0.0214145	0.065403
ENSG00000053254.16	chr14	-	3	4.17876	0.0216953	0.066051
ENSG00000198431.16	chr12	+	4	3.47402	0.0216956	0.066051
ENSG00000166963.13	chr15	+	2	5.82852	0.021767	0.0661635
ENSG00000283154.2	chr3	+	2	5.82039	0.0218516	0.0663155
ENSG00000133142.18	chrX	+	2	5.80726	0.0219492	0.0664838
ENSG00000105202.9	chr19	-	2	5.80467	0.0219764	0.0664838
ENSG00000114439.19	chr3	+	2	5.78969	0.0221345	0.0668566
ENSG00000126457.22	chr19	+	3	4.14326	0.0223542	0.0674142
ENSG00000050820.17	chr16	-	3	4.13856	0.0224431	0.067576
ENSG00000114923.17	chr2	+	4	3.42798	0.0228719	0.0687591
ENSG00000066136.20	chr1	+	2	5.71522	0.0229391	0.0688531
ENSG00000181722.17	chr3	-	3	4.09624	0.0232595	0.0697059
ENSG00000117228.11	chr1	-	2	5.65596	0.023602	0.0705413
ENSG00000152413.15	chr5	-	2	5.6551	0.0236119	0.0705413
ENSG00000178607.17	chr17	-	2	5.64566	0.0237194	0.0707525
ENSG00000116754.13	chr1	+	2	5.62575	0.0239481	0.0713236
ENSG00000134321.13	chr2	+	2	5.61162	0.0241534	0.0718236
ENSG00000104881.16	chr19	-	2	5.58662	0.0244045	0.0723593
ENSG00000120833.14	chr12	+	4	3.37248	0.024409	0.0723593
ENSG00000088682.14	chr16	+	2	5.57892	0.0244955	0.0724679
ENSG00000060656.20	chr1	+	2	5.57675	0.0245212	0.0724679
ENSG00000205220.12	chr16	-	2	5.55501	0.0247803	0.0731209
ENSG00000064225.12	chr3	+	2	5.55019	0.0248388	0.0731809
ENSG00000129675.16	chrX	-	2	5.53839	0.0249803	0.073485
ENSG00000112419.14	chr6	+	2	5.51729	0.0252369	0.074126
ENSG00000150347.17	chr10	+	2	5.51274	0.0252925	0.074176
ENSG00000106631.8	chr7	-	2	5.50064	0.0254839	0.0746229
ENSG00000198218.11	chr3	-	2	5.47234	0.025793	0.0754132
ENSG00000043143.21	chr5	+	3	3.96307	0.0260374	0.0760118
ENSG00000106025.9	chr7	-	2	5.43658	0.0262882	0.0766273
ENSG00000115290.10	chr2	-	2	5.39905	0.0267289	0.0777937
ENSG00000250722.6	chr5	-	2	5.3852	0.0269099	0.0782017
ENSG00000169862.19	chr5	-	2	5.36814	0.0271783	0.0788623
ENSG00000130600.19	chr11	-	3	3.91068	0.0272385	0.0789175
ENSG00000167701.14	chr8	+	2	5.32332	0.0277792	0.0802235
ENSG00000008130.15	chr1	-	2	5.31962	0.0277853	0.0802235
ENSG00000125618.18	chr2	-	2	5.31746	0.0278147	0.0802235
ENSG00000169045.17	chr5	-	2	5.28575	0.0282497	0.0813222
ENSG00000018625.15	chr1	+	2	5.28673	0.0282805	0.0813222
ENSG00000179988.15	chr10	+	2	5.26479	0.0285412	0.0818322
ENSG00000135486.19	chr12	+	2	5.26465	0.0285431	0.0818322
ENSG00000134590.14	chrX	+	2	5.25925	0.0286189	0.0819269
ENSG00000110237.5	chr11	+	2	5.25506	0.0286776	0.0819727
ENSG00000110911.17	chr12	-	2	5.24606	0.0288046	0.0822132
ENSG00000119950.21	chr10	+	3	3.82853	0.0292207	0.0832768
ENSG00000196923.14	chr5	-	2	5.20322	0.029417	0.0837119
ENSG00000160111.14	chr19	-	2	5.18684	0.0296549	0.0841511
ENSG00000100888.15	chr14	-	2	5.18655	0.0296591	0.0841511
ENSG00000162496.9	chr1	-	2	5.16892	0.0299442	0.0848346
ENSG00000087008.16	chr4	-	2	5.15762	0.0300845	0.0849917
ENSG00000198668.13	chr14	+	2	5.15737	0.0300883	0.0849917
ENSG00000101333.18	chr20	+	2	5.13272	0.0305019	0.0860334
ENSG00000139687.16	chr13	+	2	5.10348	0.0308989	0.087025
ENSG00000177606.8	chr1	-	2	5.09587	0.0310154	0.087225
ENSG00000099622.14	chr19	+	3	3.74611	0.0313297	0.0878956
ENSG00000072682.20	chr5	-	2	5.07445	0.0313454	0.0878956
ENSG00000169764.16	chr2	+	3	3.74275	0.0314557	0.0880759
ENSG00000108946.15	chr17	+	4	3.15036	0.0317176	0.0886262
ENSG00000198393.8	chr12	+	2	5.04752	0.0317661	0.0886262
ENSG00000074964.17	chr1	+	2	5.04595	0.0317908	0.0886262
ENSG00000068971.14	chr11	+	2	5.03776	0.0319201	0.0888574
ENSG00000182551.14	chr2	-	2	5.01696	0.0322509	0.0896483
ENSG00000085563.15	chr7	-	2	5.00829	0.03239	0.0898665
ENSG00000110077.14	chr11	-	2	5.00622	0.0324232	0.0898665
ENSG00000168264.11	chr1	-	2	4.99376	0.0326519	0.09037
ENSG00000156508.19	chr6	-	3	3.69292	0.0327912	0.0906247
ENSG00000165629.20	chr10	+	3	3.68867	0.032911	0.0908249
ENSG00000133121.21	chr13	-	3	3.68407	0.0330412	0.0910156
ENSG00000205090.9	chr1	-	2	4.96616	0.033075	0.0910156
ENSG00000110492.16	chr11	+	2	4.92341	0.0337863	0.0927318
ENSG00000175866.15	chr17	+	2	4.92145	0.0338193	0.0927318
ENSG00000142230.13	chr19	+	3	3.65613	0.0338437	0.0927318
ENSG00000198715.13	chr1	-	2	4.89182	0.0343228	0.0939104
ENSG00000120742.11	chr3	-	2	4.86886	0.0347186	0.0948579
ENSG00000285938.1	chr3	+	2	4.86193	0.034839	0.0950516
ENSG00000158793.14	chr1	+	2	4.85287	0.0349973	0.0953477
ENSG00000069020.18	chr5	+	4	3.05609	0.0354144	0.0963472
ENSG00000165671.21	chr5	+	2	4.80569	0.0358338	0.0972948
ENSG00000078596.11	chrX	-	2	4.804	0.0358642	0.0972948
ENSG00000260549.2	chr16	+	2	4.79702	0.0359899	0.097498
ENSG00000137275.16	chr6	+	2	4.79112	0.0360965	0.097649
ENSG00000184939.16	chr16	+	2	4.7695	0.0364904	0.0985138
ENSG00000138193.16	chr10	+	2	4.76794	0.0365189	0.0985138
ENSG00000105483.18	chr19	-	2	4.7547	0.0367627	0.0990322
ENSG00000196465.10	chr12	+	2	4.74436	0.0369543	0.0993069
ENSG00000132405.19	chr4	+	2	4.74153	0.0370069	0.0993069
ENSG00000069275.13	chr1	-	2	4.73956	0.0370436	0.0993069
ENSG00000120549.18	chr10	+	2	4.73805	0.0370718	0.0993069
ENSG00000226742.4	chr18	+	2	4.72845	0.0372512	0.0995107
ENSG00000105707.15	chr19	+	2	4.72843	0.0372517	0.0995107
ENSG00000198626.17	chr1	+	3	3.52699	0.0378261	0.100905
ENSG00000101335.10	chr20	+	3	3.49981	0.0387252	0.102913
ENSG00000161011.20	chr5	+	3	3.49747	0.0388036	0.102913
ENSG00000137106.18	chr9	+	2	4.64676	0.0388179	0.102913
ENSG00000143995.20	chr2	+	2	4.64539	0.0388448	0.102913
ENSG00000117528.14	chr1	+	2	4.64782	0.0388471	0.102913
ENSG00000091436.17	chr2	+	3	3.4937	0.0389695	0.102964
ENSG00000174437.17	chr12	+	7	2.31981	0.038974	0.102964
ENSG00000102786.15	chr13	-	2	4.62504	0.0392466	0.103476
ENSG00000128591.16	chr7	+	2	4.62612	0.0392754	0.103476
ENSG00000123143.13	chr19	+	2	4.6022	0.0397031	0.104459
ENSG00000008710.20	chr16	-	2	4.59501	0.0398479	0.104696
ENSG00000128641.19	chr2	+	2	4.57831	0.0401867	0.105442
ENSG00000184601.11	chr14	+	2	4.56557	0.0404981	0.106016
ENSG00000141012.13	chr16	-	2	4.56223	0.040516	0.106016
ENSG00000167106.12	chr9	-	3	3.44094	0.0407495	0.106482
ENSG00000080709.16	chr5	+	2	4.5325	0.0411325	0.107336
ENSG00000113657.13	chr5	-	2	4.52039	0.0414378	0.107986
ENSG00000163605.15	chr3	+	3	3.41844	0.0415521	0.108137
ENSG00000180035.13	chr16	+	2	4.49026	0.0420264	0.109223
ENSG00000169122.11	chr8	+	2	4.48275	0.0421876	0.109494
ENSG00000100196.11	chr22	+	2	4.46066	0.0426656	0.110585
ENSG00000126970.16	chrX	-	2	4.45583	0.042771	0.110708
ENSG00000177200.17	chr16	+	4	2.89256	0.0429632	0.111056
ENSG00000072062.15	chr19	-	2	4.4352	0.0432241	0.11158
ENSG00000093167.18	chr3	-	2	4.4092	0.0438026	0.112921
ENSG00000159314.11	chr17	-	3	3.35293	0.0439845	0.113238
ENSG00000117616.18	chr1	-	2	4.39617	0.0441263	0.113451
ENSG00000115904.14	chr2	-	2	4.34951	0.0451636	0.115962
ENSG00000076864.19	chr1	-	2	4.32124	0.0458246	0.117502
ENSG00000110321.19	chr11	-	6	2.36965	0.0461726	0.118236
ENSG00000082438.18	chr2	-	2	4.29689	0.0464025	0.118667
ENSG00000132849.21	chr1	+	2	4.29574	0.0464829	0.118714
ENSG00000108515.18	chr17	+	2	4.28801	0.0466683	0.119029
ENSG00000107738.20	chr10	-	2	4.28197	0.0467605	0.119106
ENSG00000184640.20	chr17	+	4	2.81935	0.046853	0.119183
ENSG00000158158.12	chr2	+	2	4.27103	0.0470353	0.119488
ENSG00000130529.16	chr19	+	2	4.26411	0.047193	0.119705
ENSG00000117707.16	chr1	+	3	3.27183	0.0472454	0.119705
ENSG00000070404.10	chr19	+	2	4.25501	0.0474685	0.120111
ENSG00000139132.15	chr12	+	4	2.80167	0.0478445	0.120904
ENSG00000166444.19	chr11	-	3	3.25467	0.0479152	0.120923
ENSG00000196482.18	chr1	-	5	2.52472	0.0483169	0.121621
ENSG00000116128.11	chr1	+	2	4.21849	0.0483185	0.121621
ENSG00000179526.17	chr8	-	3	3.24029	0.0485205	0.121969
ENSG00000144579.8	chr2	+	2	4.2075	0.0485939	0.121994
ENSG00000102024.18	chrX	+	2	4.19815	0.0488297	0.122425
ENSG00000049618.24	chr6	+	2	4.19677	0.0489003	0.122442
ENSG00000146540.15	chr7	-	3	3.22692	0.0490907	0.12266
ENSG00000136521.13	chr3	+	2	4.1869	0.0491152	0.12266
ENSG00000197714.9	chr19	+	2	4.18285	0.0492182	0.122757
ENSG00000137767.14	chr15	+	2	4.16751	0.0496114	0.123577
ENSG00000129009.13	chr15	+	2	4.14879	0.0501204	0.124683
ENSG00000038274.17	chr5	+	2	4.14038	0.050315	0.125005
ENSG00000204438.11	chr6	-	2	4.10392	0.0512781	0.127233
ENSG00000172831.14	chr16	+	2	4.0916	0.0516081	0.127887
ENSG00000115677.17	chr2	-	5	2.47759	0.0517751	0.128135
ENSG00000079432.8	chr19	+	2	4.06945	0.0522075	0.129039
ENSG00000165995.22	chr10	+	3	3.1484	0.0525822	0.129797
ENSG00000235109.7	chr6	-	2	4.04985	0.0527997	0.130167
ENSG00000151474.23	chr10	-	2	3.99552	0.054265	0.13348
ENSG00000134758.14	chr18	+	2	3.99489	0.0542829	0.13348
ENSG00000139117.14	chr12	-	2	3.98959	0.0544338	0.13368
ENSG00000113916.18	chr3	-	2	3.98488	0.0546053	0.13393
ENSG00000116584.20	chr1	-	2	3.9705	0.0549816	0.13468
ENSG00000077782.21	chr8	-	2	3.9599	0.0552882	0.135259
ENSG00000176046.9	chr16	-	2	3.942	0.0558105	0.136363
ENSG00000101019.22	chr20	-	2	3.9236	0.0564094	0.13765
ENSG00000205560.13	chr22	-	2	3.92068	0.056496	0.137687
ENSG00000092098.17	chr14	+	2	3.901	0.0570281	0.138807
ENSG00000132329.11	chr2	+	2	3.88462	0.0575788	0.13997
ENSG00000096696.14	chr6	+	2	3.87547	0.0578009	0.140332
ENSG00000134871.19	chr13	+	2	3.87261	0.0578884	0.140366
ENSG00000154978.13	chr7	-	2	3.86841	0.0580167	0.1405
ENSG00000182473.22	chr17	-	2	3.8439	0.0587729	0.142152
ENSG00000169375.16	chr15	-	2	3.83048	0.0591916	0.142984
ENSG00000183010.17	chr17	-	2	3.8264	0.0593762	0.14325
ENSG00000197702.14	chr11	+	3	3.0048	0.0596561	0.143521
ENSG00000241878.11	chr22	-	2	3.81408	0.0597077	0.143521
ENSG00000114541.15	chr3	-	5	2.38022	0.0597131	0.143521
ENSG00000122643.22	chr7	-	2	3.80643	0.0599504	0.143911
ENSG00000168405.17	chr6	-	3	2.9874	0.0605783	0.145174
ENSG00000112183.15	chr6	+	2	3.78701	0.060628	0.145174
ENSG00000163110.15	chr4	+	3	2.98195	0.0608703	0.145573
ENSG00000142937.12	chr1	+	2	3.76949	0.0611367	0.14582
ENSG00000122367.20	chr10	+	2	3.77024	0.0611696	0.14582
ENSG00000182606.17	chr3	+	2	3.76925	0.0612017	0.14582
ENSG00000135679.25	chr12	+	2	3.76415	0.0613105	0.145898
ENSG00000214063.11	chr11	+	2	3.76041	0.0614324	0.146007
ENSG00000197905.10	chr12	+	2	3.74871	0.0618421	0.146798
ENSG00000101210.13	chr20	-	3	2.96189	0.0619576	0.146891
ENSG00000236714.3	chr5	+	2	3.73799	0.0622268	0.147347
ENSG00000213145.10	chr14	+	2	3.73316	0.0623629	0.147487
ENSG00000143420.19	chr1	-	2	3.71609	0.0628988	0.148404
ENSG00000140830.9	chr16	-	2	3.7169	0.0629054	0.148404
ENSG00000124772.12	chr6	-	3	2.94129	0.0631414	0.148778
ENSG00000119707.14	chr14	+	2	3.69635	0.0635645	0.149575
ENSG00000169641.13	chr1	-	2	3.69426	0.0636356	0.149575
ENSG00000105643.10	chr19	+	3	2.92602	0.0639526	0.150075
ENSG00000166913.13	chr20	+	2	3.68257	0.0640337	0.150075
ENSG00000177963.14	chr11	+	2	3.68113	0.0640833	0.150075
ENSG00000023734.11	chr12	+	2	3.67489	0.0642971	0.150392
ENSG00000108387.15	chr17	-	3	2.91746	0.0644386	0.15054
ENSG00000175449.14	chr5	+	2	3.66482	0.0646441	0.150836
ENSG00000171444.18	chr5	-	3	2.91222	0.0647378	0.150871
ENSG00000167797.8	chr11	-	2	3.66029	0.0648589	0.150945
ENSG00000164849.10	chr7	+	2	3.65667	0.0649267	0.150945
ENSG00000230590.11	chrX	-	2	3.65098	0.0651244	0.15108
ENSG00000242282.6	chr2	-	2	3.65213	0.0651425	0.15108
ENSG00000059145.19	chr16	-	2	3.63573	0.0656584	0.152093
ENSG00000008513.16	chr8	-	2	3.62681	0.0659732	0.152585
ENSG00000169554.22	chr2	-	3	2.88989	0.0660301	0.152585
ENSG00000164951.16	chr8	+	2	3.622	0.0662017	0.152692
ENSG00000132002.9	chr19	-	2	3.62105	0.0662354	0.152692
ENSG00000133878.9	chr8	-	2	3.61188	0.0665618	0.15326
ENSG00000225733.6	chr3	-	2	3.59671	0.0670472	0.154135
ENSG00000198517.10	chr7	+	2	3.59518	0.0671025	0.154135
ENSG00000153113.24	chr5	+	5	2.29501	0.067667	0.155196
ENSG00000006194.10	chr16	+	2	3.57796	0.0677263	0.155196
ENSG00000197360.9	chr19	-	2	3.5707	0.0679911	0.155617
ENSG00000126267.11	chr19	+	2	3.56248	0.0682926	0.156121
ENSG00000105438.9	chr19	-	2	3.55534	0.0685557	0.156535
ENSG00000179915.24	chr2	-	3	2.84056	0.0689813	0.15732
ENSG00000152217.20	chr18	+	2	3.54103	0.0690861	0.157372
ENSG00000269313.5	chrX	+	2	3.51971	0.0698854	0.159004
ENSG00000204590.12	chr6	-	2	3.50214	0.0705517	0.160142
ENSG00000166741.8	chr11	+	2	3.50366	0.0705526	0.160142
ENSG00000284969.1	chr11	-	2	3.49915	0.0706658	0.160209
ENSG00000163947.12	chr3	-	3	2.79432	0.0718727	0.162753
ENSG00000049323.16	chr2	+	2	3.46539	0.0719804	0.162805
ENSG00000164054.15	chr3	-	2	3.46185	0.072107	0.162899
ENSG00000184752.13	chr12	-	2	3.45892	0.0722213	0.162965
ENSG00000114867.22	chr3	+	3	2.78488	0.0724779	0.163352
ENSG00000183963.19	chr22	+	2	3.43771	0.0731165	0.164598
ENSG00000274750.2	chr6	+	2	3.40066	0.0745431	0.167613
ENSG00000105514.8	chr19	-	2	3.39816	0.0746443	0.167644
ENSG00000120071.15	chr17	-	2	3.38799	0.0751187	0.168512
ENSG00000130294.18	chr2	-	2	3.37419	0.0756253	0.169261
ENSG00000156802.13	chr8	-	2	3.37404	0.0756588	0.169261
ENSG00000185567.7	chr14	-	2	3.37341	0.0757173	0.169261
ENSG00000271952.2	chr2	+	2	3.36547	0.0760455	0.169797
ENSG00000156958.15	chr15	+	2	3.35735	0.0763234	0.170178
ENSG00000198270.13	chr12	-	2	3.35566	0.0763936	0.170178
ENSG00000106992.19	chr9	-	2	3.337	0.0771763	0.171722
ENSG00000092068.20	chr14	-	2	3.33621	0.0772698	0.171731
ENSG00000116667.15	chr1	+	2	3.31971	0.0779097	0.172952
ENSG00000196405.13	chr14	+	3	2.68659	0.079133	0.175316
ENSG00000118263.15	chr2	-	2	3.2907	0.0791573	0.175316
ENSG00000110700.7	chr11	-	2	3.28508	0.0794021	0.175655
ENSG00000101972.19	chrX	+	2	3.28015	0.0796168	0.175928
ENSG00000204482.11	chr6	+	2	3.26444	0.0803065	0.177242
ENSG00000262879.6	chr17	-	2	3.26241	0.0803965	0.177242
ENSG00000114391.13	chr3	-	2	3.25808	0.0805878	0.17746
ENSG00000186577.14	chr6	-	2	3.23945	0.0814178	0.179082
ENSG00000128595.17	chr7	+	2	3.23172	0.0817789	0.179635
ENSG00000134897.14	chr13	+	2	3.22866	0.081903	0.179635
ENSG00000159176.14	chr1	-	2	3.22761	0.0819502	0.179635
ENSG00000147408.14	chr8	-	3	2.63876	0.0826146	0.180786
ENSG00000163798.13	chr2	+	2	3.21188	0.0826639	0.180786
ENSG00000183098.11	chr13	+	2	3.20149	0.083139	0.181618
ENSG00000072195.15	chr2	+	4	2.32991	0.0837904	0.182833
ENSG00000104967.8	chr19	-	2	3.17762	0.0842424	0.18361
ENSG00000178860.9	chr8	-	2	3.17372	0.084424	0.183797
ENSG00000163882.9	chr3	+	2	3.16999	0.0845987	0.183969
ENSG00000107771.17	chr10	+	2	3.1654	0.0848137	0.184227
ENSG00000013563.14	chrX	-	2	3.142	0.0859475	0.186363
ENSG00000184702.20	chr22	+	3	2.59334	0.0859911	0.186363
ENSG00000240849.11	chr20	-	2	3.1335	0.0863259	0.186877
ENSG00000123636.18	chr2	-	2	3.13136	0.0864281	0.186887
ENSG00000094916.16	chr12	-	2	3.1233	0.0868155	0.187291
ENSG00000157600.12	chrX	+	2	3.12456	0.0868163	0.187291
ENSG00000159131.17	chr21	-	2	3.1214	0.0869075	0.187291
ENSG00000136436.15	chr17	+	3	2.57918	0.0870895	0.187409
ENSG00000166068.13	chr15	+	2	3.11621	0.0871579	0.187409
ENSG00000265681.7	chr18	-	2	3.09664	0.088139	0.189306
ENSG00000095370.20	chr9	-	3	2.56418	0.0882689	0.189373
ENSG00000124788.19	chr6	-	2	3.0875	0.0885604	0.189787
ENSG00000125746.18	chr19	-	2	3.08501	0.0886833	0.189838
ENSG00000164107.9	chr4	-	3	2.5537	0.0891024	0.190522
ENSG00000137074.20	chr9	-	2	3.06533	0.0896608	0.191503
ENSG00000175274.19	chr11	-	2	3.0631	0.0897724	0.191528
ENSG00000197971.16	chr18	-	3	2.54209	0.0900866	0.191985
ENSG00000077522.14	chr1	+	3	2.53941	0.0902525	0.192125
ENSG00000127838.14	chr2	+	3	2.53692	0.0904549	0.192342
ENSG00000160299.17	chr21	+	2	3.04548	0.0907206	0.192693
ENSG00000198832.10	chr22	-	2	3.04215	0.0908282	0.192708
ENSG00000082014.17	chr7	-	2	3.02215	0.091849	0.194659
ENSG00000150764.14	chr11	+	3	2.5184	0.0920235	0.194814
ENSG00000197461.13	chr7	-	2	3.01235	0.0923542	0.195298
ENSG00000117984.15	chr11	-	2	3.00573	0.0926966	0.195806
ENSG00000282221.1	chr1	+	2	2.99866	0.0931266	0.196403
ENSG00000144596.13	chr3	-	2	2.99756	0.093184	0.196403
ENSG00000088899.15	chr20	-	2	2.99215	0.0934049	0.196653
ENSG00000123562.18	chrX	-	2	2.98976	0.0935301	0.1967
ENSG00000103316.12	chr16	-	2	2.98239	0.0939793	0.197429
ENSG00000172159.16	chr9	-	2	2.95411	0.0954833	0.200369
ENSG00000136560.14	chr2	+	2	2.94846	0.0957251	0.200656
ENSG00000188257.12	chr1	-	2	2.94522	0.0959616	0.200767
ENSG00000170892.13	chr19	+	2	2.94299	0.0960201	0.200767
ENSG00000011454.18	chr9	+	2	2.94167	0.0960916	0.200767
ENSG00000162599.17	chr1	+	2	2.9379	0.0962957	0.200974
ENSG00000159842.15	chr17	-	5	2.04782	0.0969119	0.20204
ENSG00000114544.17	chr3	-	2	2.91529	0.0975305	0.203109
ENSG00000250608.2	chr3	-	2	2.9096	0.0978441	0.203473
ENSG00000166025.18	chr11	+	2	2.90638	0.0980216	0.203473
ENSG00000122417.15	chr1	-	2	2.90635	0.0980234	0.203473
ENSG00000166348.19	chr10	-	2	2.89628	0.0985823	0.204412
ENSG00000101557.15	chr18	+	2	2.89379	0.0987213	0.204479
ENSG00000116194.13	chr1	-	2	2.86351	0.100427	0.207787
ENSG00000112992.18	chr5	+	2	2.8442	0.101532	0.209847
ENSG00000196502.12	chr16	-	2	2.84133	0.101697	0.209963
ENSG00000166925.9	chr7	-	2	2.82519	0.102634	0.211668
ENSG00000023191.17	chr11	-	3	2.39248	0.103021	0.21224
ENSG00000224397.7	chr20	+	2	2.81714	0.103167	0.212311
ENSG00000159720.12	chr16	-	2	2.80832	0.103623	0.213021
ENSG00000014216.16	chr11	+	2	2.80373	0.103894	0.21335
ENSG00000150995.20	chr3	+	2	2.79879	0.104187	0.213722
ENSG00000109654.16	chr4	+	2	2.78902	0.10478	0.21471
ENSG00000108984.15	chr17	+	2	2.77896	0.105371	0.215689
ENSG00000077044.11	chr2	+	2	2.76799	0.106032	0.216812
ENSG00000103710.11	chr15	-	2	2.76095	0.106522	0.217581
ENSG00000068383.19	chr10	+	2	2.75496	0.106824	0.217967
ENSG00000182199.11	chr12	+	3	2.34872	0.107179	0.218458
ENSG00000112624.12	chr6	+	2	2.74347	0.107528	0.218938
ENSG00000031003.10	chr5	-	2	2.74146	0.107715	0.219085
ENSG00000137831.15	chr15	-	2	2.738	0.107866	0.219159
ENSG00000120729.10	chr5	+	2	2.7355	0.108083	0.219368
ENSG00000158864.13	chr1	+	2	2.72296	0.108798	0.220587
ENSG00000178796.13	chr1	+	2	2.7219	0.108927	0.220615
ENSG00000054148.18	chr9	+	2	2.70028	0.110223	0.223004
ENSG00000214530.10	chr11	-	2	2.68896	0.111005	0.224349
ENSG00000066697.15	chr9	+	2	2.68517	0.111185	0.224476
ENSG00000159348.13	chr1	-	2	2.68296	0.111326	0.224524
ENSG00000117114.20	chr1	+	3	2.29644	0.112377	0.226406
ENSG00000177311.11	chr3	+	2	2.65666	0.113024	0.227471
ENSG00000135631.17	chr2	-	2	2.65509	0.113168	0.227522
ENSG00000155324.10	chr5	+	2	2.64914	0.113515	0.227981
ENSG00000144935.15	chr3	+	2	2.64544	0.113758	0.228229
ENSG00000251562.8	chr11	+	2	2.63526	0.114428	0.229334
ENSG00000140105.18	chr14	-	2	2.62053	0.115469	0.231179
ENSG00000152601.17	chr3	+	2	2.61468	0.115797	0.231594
ENSG00000131446.17	chr5	-	4	2.05496	0.116218	0.232193
ENSG00000121057.13	chr17	+	2	2.60669	0.116397	0.232309
ENSG00000168016.15	chr3	-	2	2.59988	0.116794	0.232859
ENSG00000148411.8	chr9	-	2	2.59551	0.11709	0.233206
ENSG00000275131.3	chr1	-	2	2.59152	0.117423	0.233628
ENSG00000137094.15	chr9	+	3	2.24247	0.118071	0.234505
ENSG00000139218.18	chr12	-	2	2.58057	0.118108	0.234505
ENSG00000124422.12	chr17	-	2	2.5737	0.11858	0.235199
ENSG00000196704.14	chr17	+	2	2.56942	0.118876	0.235541
ENSG00000137843.12	chr15	+	2	2.56138	0.119432	0.23637
ENSG00000196507.11	chrX	+	2	2.55859	0.119626	0.23637
ENSG00000204681.11	chr6	-	2	2.55804	0.119664	0.23637
ENSG00000130592.17	chr11	+	3	2.22341	0.120082	0.236952
ENSG00000114993.17	chr2	-	2	2.53168	0.121515	0.239533
ENSG00000149823.9	chr11	+	2	2.52758	0.121805	0.239859
ENSG00000259498.1	chr15	-	2	2.52104	0.122271	0.240529
ENSG00000138867.17	chr22	-	2	2.51852	0.122451	0.240636
ENSG00000144331.20	chr2	-	3	2.1929	0.123463	0.242377
ENSG00000153406.14	chr16	-	2	2.49449	0.124182	0.242908
ENSG00000166965.12	chr15	+	2	2.49358	0.124248	0.242908
ENSG00000118473.22	chr1	+	2	2.49415	0.12427	0.242908
ENSG00000150093.20	chr10	-	2	2.49201	0.124363	0.242908
ENSG00000112137.18	chr6	+	3	2.18489	0.124367	0.242908
ENSG00000012232.9	chr8	+	2	2.47634	0.125571	0.244813
ENSG00000126777.18	chr14	+	3	2.17426	0.125629	0.244813
ENSG00000162772.17	chr1	+	3	2.17246	0.125783	0.244813
ENSG00000047849.21	chr3	-	4	1.98822	0.125853	0.244813
ENSG00000055609.20	chr7	-	2	2.467	0.126197	0.245235
ENSG00000134769.22	chr18	+	3	2.1647	0.126728	0.246017
ENSG00000010282.15	chr3	-	2	2.44952	0.127562	0.247293
ENSG00000123600.20	chr2	-	2	2.44638	0.127735	0.247293
ENSG00000118596.12	chr12	+	2	2.44671	0.127772	0.247293
ENSG00000129353.15	chr19	+	2	2.43809	0.128358	0.24769
ENSG00000203709.12	chr1	-	2	2.43685	0.128452	0.24769
ENSG00000101161.8	chr20	+	2	2.43683	0.128482	0.24769
ENSG00000145990.11	chr6	-	2	2.43667	0.128494	0.24769
ENSG00000141298.19	chr17	-	2	2.42757	0.129155	0.24822
ENSG00000179583.20	chr16	+	4	1.96609	0.129169	0.24822
ENSG00000167491.17	chr19	+	2	2.42638	0.129246	0.24822
ENSG00000115459.18	chr2	+	2	2.42584	0.129287	0.24822
ENSG00000127483.19	chr1	-	2	2.41795	0.129889	0.248998
ENSG00000131196.18	chr18	+	2	2.41713	0.129952	0.248998
ENSG00000172493.22	chr4	+	3	2.13209	0.130502	0.249802
ENSG00000163399.16	chr1	+	2	2.39573	0.131665	0.251778
ENSG00000151135.10	chr12	+	2	2.38993	0.132054	0.25227
ENSG00000135900.4	chr2	+	2	2.38437	0.132489	0.252727
ENSG00000081377.17	chr9	-	2	2.3835	0.132556	0.252727
ENSG00000124155.18	chr20	+	3	2.11238	0.132871	0.253074
ENSG00000164116.17	chr4	+	2	2.37579	0.133162	0.253147
ENSG00000135424.18	chr12	-	2	2.37619	0.133173	0.253147
ENSG00000105568.18	chr19	+	2	2.37109	0.133534	0.25347
ENSG00000109819.9	chr4	-	2	2.37016	0.133607	0.25347
ENSG00000111077.18	chr12	+	3	2.10069	0.134298	0.254136
ENSG00000113448.19	chr5	-	2	2.36205	0.134313	0.254136
ENSG00000204310.13	chr6	-	2	2.36072	0.134356	0.254136
ENSG00000079819.19	chr6	-	2	2.3558	0.134748	0.254627
ENSG00000164733.22	chr8	-	3	2.09544	0.134944	0.254747
ENSG00000175287.19	chr9	+	2	2.34909	0.135286	0.255141
ENSG00000124749.17	chr6	-	2	2.34587	0.135607	0.255495
ENSG00000106069.23	chr7	+	2	2.33172	0.13675	0.256815
ENSG00000099341.12	chr19	+	2	2.33005	0.136823	0.256815
ENSG00000236404.10	chr9	-	3	2.07979	0.136914	0.256815
ENSG00000150991.15	chr12	-	2	2.32866	0.136936	0.256815
ENSG00000138594.14	chr15	+	2	2.32773	0.137067	0.256815
ENSG00000147065.17	chrX	+	2	2.32608	0.137209	0.256815
ENSG00000140382.15	chr15	+	2	2.32488	0.137245	0.256815
ENSG00000071242.12	chr6	-	2	2.32244	0.137444	0.256937
ENSG00000086848.15	chr11	-	2	2.31388	0.138208	0.258114
ENSG00000077150.20	chr10	+	2	2.30278	0.139062	0.259456
ENSG00000130024.15	chr6	-	2	2.2928	0.139892	0.260627
ENSG00000188312.14	chr9	+	2	2.29102	0.140041	0.260627
ENSG00000036549.13	chr1	-	2	2.28937	0.140178	0.260627
ENSG00000106772.18	chr9	-	2	2.28872	0.140233	0.260627
ENSG00000112759.19	chr6	+	4	1.89354	0.140836	0.261495
ENSG00000132938.22	chr13	+	2	2.25751	0.142874	0.264969
ENSG00000120885.22	chr8	-	2	2.25597	0.143068	0.264969
ENSG00000147403.18	chrX	+	2	2.25461	0.143122	0.264969
ENSG00000177000.13	chr1	-	4	1.87423	0.144059	0.266446
ENSG00000156110.15	chr10	+	2	2.22216	0.145998	0.269773
ENSG00000182177.14	chr2	-	2	2.21849	0.146258	0.269993
ENSG00000102781.14	chr13	-	2	2.21665	0.14642	0.270031
ENSG00000132640.15	chr20	+	2	2.21038	0.146974	0.270734
ENSG00000011465.18	chr12	-	5	1.75761	0.147083	0.270734
ENSG00000167863.12	chr17	-	2	2.20032	0.147866	0.271915
ENSG00000146147.15	chr6	+	2	2.19447	0.148391	0.272618
ENSG00000172992.12	chr17	-	2	2.18316	0.149403	0.274216
ENSG00000160808.11	chr3	-	2	2.17102	0.150531	0.276022
ENSG00000175550.8	chr11	+	2	2.16784	0.150793	0.276238
ENSG00000131730.16	chr5	+	3	1.97022	0.151356	0.276831
ENSG00000134138.20	chr15	-	4	1.8323	0.151405	0.276831
ENSG00000154305.18	chr1	+	2	2.14563	0.152833	0.279175
ENSG00000158747.15	chr1	+	2	2.13981	0.153374	0.279896
ENSG00000258315.5	chr17	+	2	2.13641	0.15369	0.280019
ENSG00000113594.10	chr5	-	2	2.13552	0.153773	0.280019
ENSG00000131828.14	chrX	+	2	2.13438	0.153879	0.280019
ENSG00000165912.16	chr11	-	2	2.12941	0.154344	0.280598
ENSG00000188522.15	chr17	-	2	2.11157	0.156026	0.283389
ENSG00000277258.5	chr17	-	2	2.10431	0.156718	0.284375
ENSG00000130299.17	chr19	+	2	2.09585	0.157526	0.285572
ENSG00000136237.19	chr7	-	2	2.08231	0.158833	0.287498
ENSG00000233237.8	chr6	-	2	2.08173	0.158889	0.287498
ENSG00000115183.15	chr2	+	2	2.07431	0.15961	0.288494
ENSG00000107796.13	chr10	-	2	2.07321	0.15974	0.288494
ENSG00000121316.11	chr12	-	2	2.06882	0.160146	0.288934
ENSG00000143179.16	chr1	+	2	2.06804	0.160284	0.288934
ENSG00000198959.12	chr20	-	2	2.06573	0.160449	0.288959
ENSG00000172819.17	chr12	-	3	1.89179	0.162687	0.292715
ENSG00000170525.21	chr10	+	3	1.88839	0.163197	0.293357
ENSG00000171604.12	chr5	+	2	2.03415	0.163584	0.293777
ENSG00000123815.13	chr19	-	4	1.7635	0.164269	0.294732
ENSG00000205189.12	chr8	+	2	2.02269	0.164739	0.295298
ENSG00000018189.13	chr4	+	2	2.0065	0.166387	0.297974
ENSG00000129824.16	chrY	+	2	2.00153	0.166898	0.29861
ENSG00000164318.18	chr5	+	2	1.99074	0.168011	0.300322
ENSG00000015153.15	chr12	-	2	1.98518	0.168589	0.300715
ENSG00000137507.11	chr11	-	2	1.98402	0.168709	0.300715
ENSG00000163848.20	chr3	-	2	1.98291	0.168825	0.300715
ENSG00000072818.12	chr17	+	2	1.98259	0.168858	0.300715
ENSG00000182732.18	chr14	+	2	1.96676	0.170518	0.303362
ENSG00000088387.19	chr13	-	2	1.96541	0.170661	0.303362
ENSG00000185129.8	chr5	+	2	1.96303	0.170913	0.303528
ENSG00000058056.10	chr3	+	3	1.82914	0.172372	0.305837
ENSG00000174891.13	chr3	+	2	1.94042	0.173325	0.307243
ENSG00000168395.16	chr2	+	2	1.93728	0.173662	0.307375
ENSG00000114853.15	chr3	+	2	1.93712	0.17372	0.307375
ENSG00000234520.6	chr7	-	2	1.93344	0.174138	0.307831
ENSG00000118971.9	chr12	+	2	1.93169	0.174307	0.307846
ENSG00000115194.11	chr2	-	2	1.92104	0.175485	0.309641
ENSG00000070961.16	chr12	-	2	1.89977	0.177764	0.313374
ENSG00000182175.14	chr15	-	2	1.888	0.179074	0.315394
ENSG00000042753.12	chr19	-	2	1.88187	0.179762	0.316316
ENSG00000008838.20	chr17	-	2	1.85771	0.182502	0.32063
ENSG00000064042.18	chr4	+	3	1.76606	0.182736	0.32063
ENSG00000102678.7	chr13	+	2	1.85553	0.182752	0.32063
ENSG00000178149.17	chr3	-	2	1.85439	0.182883	0.32063
ENSG00000100599.16	chr14	+	2	1.85209	0.183146	0.320798
ENSG00000140650.12	chr16	+	2	1.84177	0.184338	0.322591
ENSG00000164093.17	chr4	-	2	1.82927	0.185792	0.32483
ENSG00000168675.19	chr18	+	5	1.59156	0.186057	0.32483
ENSG00000172037.14	chr3	-	2	1.82643	0.186125	0.32483
ENSG00000173065.13	chr17	-	2	1.82005	0.186874	0.325841
ENSG00000146834.14	chr7	+	2	1.81825	0.187086	0.325913
ENSG00000173960.14	chr2	+	2	1.81628	0.187318	0.326023
ENSG00000251247.11	chr19	+	2	1.8089	0.188192	0.327246
ENSG00000117625.14	chr1	+	2	1.79832	0.189455	0.329144
ENSG00000110871.15	chr12	-	2	1.77573	0.192183	0.333581
ENSG00000115902.11	chr2	+	2	1.76773	0.193161	0.334975
ENSG00000079308.19	chr2	-	9	1.42307	0.193398	0.335083
ENSG00000113580.15	chr5	-	2	1.76323	0.193713	0.335326
ENSG00000211448.13	chr14	-	2	1.76001	0.194169	0.335525
ENSG00000172009.15	chr19	+	2	1.75968	0.194177	0.335525
ENSG00000123080.12	chr1	+	2	1.75758	0.19441	0.335624
ENSG00000102547.19	chr13	-	2	1.75193	0.195109	0.336529
ENSG00000141068.14	chr17	+	2	1.74634	0.195805	0.337318
ENSG00000141552.18	chr17	+	2	1.74542	0.195919	0.337318
ENSG00000266173.7	chr17	-	2	1.74043	0.196543	0.338089
ENSG00000115963.14	chr2	-	2	1.73749	0.19697	0.338521
ENSG00000176155.19	chr17	-	2	1.7354	0.197174	0.338568
ENSG00000149091.15	chr11	+	4	1.59762	0.199845	0.342847
ENSG00000170906.16	chr19	+	2	1.70709	0.200772	0.343642
ENSG00000120899.18	chr8	+	2	1.7066	0.200835	0.343642
ENSG00000108306.13	chr17	-	2	1.70651	0.200846	0.343642
ENSG00000116857.17	chr1	-	2	1.70322	0.20127	0.34406
ENSG00000145743.17	chr5	-	2	1.70177	0.201457	0.344073
ENSG00000106246.18	chr7	-	2	1.69919	0.201791	0.344337
ENSG00000127863.16	chr13	+	2	1.69784	0.201999	0.344385
ENSG00000167680.17	chr19	-	2	1.68944	0.203056	0.34588
ENSG00000067057.18	chr10	+	4	1.58199	0.203602	0.346503
ENSG00000106018.14	chr7	-	2	1.67514	0.204963	0.348326
ENSG00000175182.15	chr3	+	2	1.67433	0.205037	0.348326
ENSG00000169398.19	chr8	-	2	1.66637	0.206089	0.349583
ENSG00000132561.14	chr8	+	2	1.66581	0.206222	0.349583
ENSG00000140632.17	chr16	-	3	1.63541	0.206323	0.349583
ENSG00000160072.20	chr1	+	2	1.6546	0.207717	0.351634
ENSG00000089159.17	chr12	-	2	1.65128	0.208103	0.351976
ENSG00000173801.17	chr17	-	2	1.64541	0.208893	0.353001
ENSG00000109686.19	chr4	-	3	1.61984	0.20939	0.35353
ENSG00000081277.13	chr1	+	2	1.63921	0.209731	0.353795
ENSG00000163964.18	chr3	+	2	1.62953	0.211049	0.355705
ENSG00000107959.17	chr10	-	2	1.61835	0.212641	0.358074
ENSG00000184489.13	chr8	+	4	1.54187	0.213405	0.359045
ENSG00000182154.8	chr9	+	2	1.61008	0.213785	0.35906
ENSG00000130304.17	chr19	+	2	1.61006	0.213789	0.35906
ENSG00000131408.15	chr19	+	2	1.60757	0.214076	0.359154
ENSG00000188643.11	chr1	-	2	1.60654	0.214219	0.359154
ENSG00000144560.15	chr3	-	4	1.53291	0.215668	0.361267
ENSG00000116774.12	chr1	+	2	1.59415	0.215952	0.361427
ENSG00000164597.15	chr7	-	3	1.57949	0.217373	0.363489
ENSG00000099968.18	chr22	+	3	1.57734	0.217809	0.363849
ENSG00000261371.6	chr17	-	2	1.57989	0.217968	0.363849
ENSG00000150593.18	chr10	+	2	1.57775	0.218272	0.363918
ENSG00000163412.13	chr3	-	2	1.576	0.218521	0.363918
ENSG00000129521.15	chr14	-	2	1.576	0.218578	0.363918
ENSG00000253320.7	chr8	+	2	1.57381	0.218835	0.364028
ENSG00000065978.19	chr1	+	2	1.56376	0.220276	0.366108
ENSG00000036672.16	chr11	-	4	1.51283	0.220842	0.366732
ENSG00000069424.15	chr1	+	3	1.55706	0.222004	0.368343
ENSG00000139579.13	chr12	+	2	1.54396	0.223151	0.369926
ENSG00000171714.12	chr11	+	2	1.52934	0.225361	0.373266
ENSG00000041880.15	chr3	+	2	1.5275	0.225577	0.373302
ENSG00000075785.14	chr3	+	3	1.5355	0.226499	0.374504
ENSG00000109572.14	chr4	+	2	1.51523	0.227405	0.375679
ENSG00000204922.5	chr11	+	2	1.51213	0.227871	0.376125
ENSG00000133678.14	chr10	+	2	1.5102	0.228162	0.376281
ENSG00000224051.7	chr1	+	2	1.50736	0.228589	0.376661
ENSG00000115657.14	chr2	-	2	1.50536	0.228891	0.376701
ENSG00000178802.18	chr15	+	3	1.52361	0.229031	0.376701
ENSG00000048707.15	chr1	+	2	1.50362	0.229212	0.376701
ENSG00000092929.12	chr17	-	2	1.50238	0.229399	0.376701
ENSG00000137502.10	chr11	-	2	1.49847	0.229991	0.377256
ENSG00000106617.15	chr7	-	4	1.47765	0.23013	0.377256
ENSG00000088992.18	chr12	-	2	1.49067	0.231181	0.378161
ENSG00000184182.19	chr2	+	2	1.49025	0.231188	0.378161
ENSG00000173113.7	chr11	-	2	1.48922	0.231346	0.378161
ENSG00000185236.12	chr19	+	2	1.48841	0.231471	0.378161
ENSG00000198722.14	chr9	+	2	1.46764	0.23468	0.383078
ENSG00000144118.14	chr2	+	2	1.45109	0.237277	0.386659
ENSG00000179950.14	chr8	-	2	1.45109	0.237277	0.386659
ENSG00000278311.5	chr17	+	2	1.44839	0.237706	0.386807
ENSG00000100234.12	chr22	+	2	1.44797	0.237771	0.386807
ENSG00000196588.20	chr22	-	2	1.44633	0.238032	0.386817
ENSG00000153815.17	chr16	+	2	1.44431	0.238353	0.386817
ENSG00000198844.12	chr17	+	2	1.44412	0.238383	0.386817
ENSG00000149131.17	chr11	+	2	1.43489	0.239856	0.388878
ENSG00000145901.16	chr5	-	2	1.43118	0.240452	0.389119
ENSG00000068831.19	chr11	-	3	1.47141	0.240515	0.389119
ENSG00000148396.18	chr9	-	2	1.42921	0.240767	0.389119
ENSG00000132669.14	chr20	+	4	1.43863	0.240899	0.389119
ENSG00000173120.15	chr11	+	2	1.42706	0.241115	0.389119
ENSG00000197050.11	chr19	+	2	1.4264	0.241222	0.389119
ENSG00000188549.12	chr15	-	2	1.42358	0.241676	0.389525
ENSG00000164050.13	chr3	-	2	1.41669	0.242795	0.391
ENSG00000167766.19	chr19	-	2	1.41425	0.243192	0.391308
ENSG00000170638.10	chr22	+	2	1.41301	0.243395	0.391308
ENSG00000174851.16	chr11	-	2	1.41041	0.243874	0.391751
ENSG00000196605.7	chr19	-	2	1.40436	0.244811	0.392398
ENSG00000167081.18	chr9	+	2	1.40401	0.244869	0.392398
ENSG00000166140.17	chr15	+	2	1.4032	0.245002	0.392398
ENSG00000176978.14	chr9	-	2	1.40085	0.245389	0.392398
ENSG00000131981.16	chr14	+	3	1.44977	0.245449	0.392398
ENSG00000079459.13	chr8	+	2	1.40049	0.245505	0.392398
ENSG00000130054.5	chrX	+	2	1.39597	0.246195	0.393174
ENSG00000170634.13	chr2	+	3	1.44474	0.24666	0.393589
ENSG00000138411.13	chr2	-	2	1.3895	0.247269	0.394233
ENSG00000105699.17	chr19	+	2	1.38558	0.247924	0.394949
ENSG00000137168.8	chr6	-	2	1.37637	0.249469	0.39708
ENSG00000125741.5	chr19	-	2	1.36742	0.250982	0.399157
ENSG00000137486.17	chr11	-	2	1.36284	0.251761	0.400064
ENSG00000153094.24	chr2	+	2	1.34572	0.254698	0.404396
ENSG00000109501.14	chr4	+	2	1.32883	0.257639	0.408728
ENSG00000105576.15	chr19	-	3	1.39449	0.258543	0.409822
ENSG00000081189.16	chr5	-	2	1.31396	0.260267	0.412214
ENSG00000138347.16	chr10	+	2	1.30684	0.261589	0.413967
ENSG00000152894.15	chr6	-	2	1.3018	0.262439	0.414969
ENSG00000198276.16	chr20	-	2	1.29782	0.263155	0.415759
ENSG00000148339.12	chr9	+	2	1.28297	0.26585	0.41967
ENSG00000110031.13	chr11	-	2	1.2785	0.266668	0.420615
ENSG00000153487.13	chr13	+	2	1.27156	0.267944	0.422282
ENSG00000109099.16	chr17	-	4	1.34514	0.268725	0.423164
ENSG00000136108.15	chr13	+	2	1.26421	0.269305	0.4234
ENSG00000093183.14	chr3	-	2	1.26415	0.269316	0.4234
ENSG00000053918.18	chr11	+	2	1.25833	0.2704	0.424756
ENSG00000086666.19	chr15	+	2	1.25614	0.27081	0.424796
ENSG00000158092.7	chr3	+	2	1.25568	0.270895	0.424796
ENSG00000164830.19	chr8	+	3	1.34407	0.271123	0.424796
ENSG00000173264.15	chr11	+	2	1.25318	0.271365	0.424796
ENSG00000196352.16	chr1	+	2	1.25256	0.271533	0.424796
ENSG00000168273.8	chr3	+	2	1.24789	0.272359	0.425741
ENSG00000166451.14	chr16	+	2	1.2466	0.272602	0.425775
ENSG00000176209.12	chr8	+	2	1.24081	0.273697	0.427136
ENSG00000119333.12	chr9	-	2	1.23444	0.27491	0.428681
ENSG00000131089.17	chrX	-	3	1.32765	0.275356	0.429027
ENSG00000173163.10	chr2	+	2	1.22586	0.276553	0.430542
ENSG00000092820.18	chr6	-	2	1.22357	0.276992	0.430655
ENSG00000081870.12	chr1	-	2	1.22315	0.277074	0.430655
ENSG00000077092.19	chr3	+	2	1.22113	0.277463	0.43091
ENSG00000106682.16	chr7	+	2	1.21894	0.277886	0.431218
ENSG00000156299.13	chr21	-	2	1.21558	0.278537	0.431879
ENSG00000159128.15	chr21	+	2	1.21417	0.278812	0.431956
ENSG00000205678.8	chr4	-	2	1.21013	0.279649	0.432903
ENSG00000269113.4	chr1	-	2	1.20556	0.280491	0.433856
ENSG00000231721.7	chr7	-	2	1.20335	0.280924	0.434176
ENSG00000105426.17	chr19	-	4	1.30392	0.281929	0.435378
ENSG00000115935.18	chr2	-	3	1.29901	0.282906	0.436536
ENSG00000237773.7	chr7	-	2	1.19012	0.283536	0.437156
ENSG00000050165.18	chr11	-	3	1.29561	0.283862	0.437307
ENSG00000063244.13	chr19	+	2	1.187	0.284156	0.437409
ENSG00000111716.14	chr12	-	3	1.29045	0.285205	0.438671
ENSG00000196419.13	chr22	+	2	1.17467	0.286627	0.440505
ENSG00000082293.13	chr6	+	2	1.16564	0.288452	0.442954
ENSG00000187514.17	chr2	+	2	1.16048	0.289553	0.444291
ENSG00000176834.14	chr12	-	2	1.15904	0.289797	0.444309
ENSG00000027001.10	chr13	-	2	1.1552	0.290584	0.445159
ENSG00000082458.12	chrX	+	3	1.26876	0.291117	0.44562
ENSG00000068024.17	chr2	-	3	1.26682	0.291652	0.446083
ENSG00000119917.15	chr10	+	2	1.14365	0.292965	0.447735
ENSG00000126461.15	chr19	+	2	1.13781	0.29418	0.449233
ENSG00000080493.18	chr4	+	2	1.13453	0.294863	0.449919
ENSG00000156030.13	chr14	-	2	1.13324	0.295135	0.449976
ENSG00000204580.13	chr6	+	2	1.12331	0.297222	0.452797
ENSG00000149809.17	chr11	+	2	1.12141	0.297675	0.453128
ENSG00000146112.12	chr6	-	3	1.24283	0.298351	0.453633
ENSG00000160710.18	chr1	-	2	1.11738	0.29848	0.453633
ENSG00000010256.11	chr3	-	2	1.11364	0.299276	0.454482
ENSG00000184009.13	chr17	-	2	1.11272	0.299522	0.454497
ENSG00000012171.20	chr3	+	2	1.11108	0.299822	0.454591
ENSG00000179051.14	chr1	-	2	1.10485	0.301159	0.456255
ENSG00000153774.9	chr16	-	2	1.10398	0.301395	0.456255
ENSG00000131386.19	chr3	+	2	1.09675	0.30294	0.458233
ENSG00000197580.13	chr11	+	2	1.09506	0.303273	0.458375
ENSG00000077157.22	chr1	+	2	1.08359	0.305826	0.46187
ENSG00000219607.4	chr6	+	2	1.08027	0.306506	0.462533
ENSG00000196440.11	chrX	+	2	1.07688	0.307254	0.463297
ENSG00000185437.14	chr21	+	3	1.20746	0.308568	0.464913
ENSG00000125834.13	chr20	+	2	1.06004	0.311006	0.4682
ENSG00000163520.14	chr3	+	2	1.05797	0.31147	0.4682
ENSG00000105855.10	chr7	+	2	1.05791	0.311483	0.4682
ENSG00000105738.11	chr19	+	2	1.05341	0.312498	0.469359
ENSG00000101413.12	chr20	+	3	1.18932	0.313883	0.47104
ENSG00000132205.11	chr18	+	2	1.04641	0.314108	0.47104
ENSG00000196141.14	chr2	+	2	1.04091	0.31534	0.472518
ENSG00000100813.14	chr14	-	2	1.0338	0.316972	0.474592
ENSG00000172757.13	chr11	-	2	1.03244	0.317287	0.474692
ENSG00000070831.17	chr1	+	2	1.03001	0.317847	0.47516
ENSG00000110429.14	chr11	-	2	1.02637	0.318739	0.476122
ENSG00000133835.17	chr5	+	2	1.02397	0.319247	0.47621
ENSG00000144366.16	chr2	+	2	1.02313	0.319442	0.47621
ENSG00000161958.11	chr17	+	3	1.1705	0.319542	0.47621
ENSG00000161955.16	chr17	+	2	1.01931	0.320334	0.476713
ENSG00000010818.10	chr6	-	2	1.01913	0.320377	0.476713
ENSG00000162909.18	chr1	+	2	1.01286	0.321847	0.478529
ENSG00000085276.19	chr3	-	3	1.15874	0.323135	0.480072
ENSG00000027075.15	chr14	+	2	1.00187	0.324493	0.481717
ENSG00000177380.14	chr19	+	2	0.999986	0.324893	0.481937
ENSG00000118900.15	chr16	+	2	0.998824	0.32517	0.481975
ENSG00000080503.24	chr9	+	4	1.17974	0.325424	0.481979
ENSG00000174405.14	chr13	-	2	0.99227	0.326738	0.48347
ENSG00000157514.16	chrX	-	2	0.991453	0.326935	0.48347
ENSG00000163156.12	chr1	+	2	0.984351	0.328647	0.485352
ENSG00000158321.18	chr7	+	3	1.14074	0.328713	0.485352
ENSG00000154556.18	chr4	-	7	1.16851	0.329575	0.48625
ENSG00000197321.15	chr10	-	3	1.13402	0.330823	0.487716
ENSG00000266412.6	chr10	-	2	0.973437	0.331349	0.488039
ENSG00000182534.13	chr17	-	3	1.13184	0.331551	0.488039
ENSG00000160753.16	chr1	+	2	0.968972	0.332397	0.48891
ENSG00000189350.13	chr2	+	2	0.96633	0.333094	0.489559
ENSG00000132153.15	chr3	+	2	0.96426	0.333558	0.489865
ENSG00000166484.20	chr17	+	2	0.952686	0.336433	0.49371
ENSG00000111913.20	chr6	-	2	0.948018	0.337602	0.495047
ENSG00000183230.17	chr10	-	2	0.944445	0.338501	0.495986
ENSG00000115468.12	chr2	+	2	0.935406	0.34079	0.498958
ENSG00000240771.8	chr12	+	2	0.928347	0.342592	0.501214
ENSG00000131143.10	chr16	+	3	1.09456	0.343492	0.502148
ENSG00000167685.15	chr19	+	2	0.902241	0.349374	0.510113
ENSG00000171988.19	chr10	-	3	1.07584	0.34968	0.510113
ENSG00000139146.14	chr12	-	2	0.900936	0.349738	0.510113
ENSG00000153310.19	chr8	-	2	0.896112	0.350993	0.511554
ENSG00000188191.15	chr7	-	2	0.895106	0.35126	0.511554
ENSG00000133069.17	chr1	+	3	1.06605	0.352963	0.513644
ENSG00000105701.16	chr19	-	3	1.06337	0.353869	0.514419
ENSG00000196136.18	chr14	+	2	0.884884	0.354032	0.514419
ENSG00000108312.15	chr17	-	2	0.870612	0.357845	0.519566
ENSG00000106034.18	chr7	+	2	0.865376	0.359275	0.521248
ENSG00000198420.10	chr7	-	2	0.862626	0.36003	0.521948
ENSG00000158435.8	chr2	+	2	0.86091	0.360502	0.522237
ENSG00000130176.8	chr19	+	3	1.03915	0.362184	0.524279
ENSG00000171385.10	chr1	-	2	0.847424	0.364241	0.526858
ENSG00000143337.19	chr1	+	2	0.846023	0.364633	0.527027
ENSG00000080824.19	chr14	-	4	1.0715	0.368367	0.532024
ENSG00000101665.9	chr18	-	2	0.831156	0.368826	0.532217
ENSG00000163681.16	chr3	+	4	1.06884	0.369469	0.532217
ENSG00000151726.15	chr4	-	3	1.01733	0.369819	0.532217
ENSG00000171492.14	chr1	+	2	0.827606	0.369837	0.532217
ENSG00000176490.5	chr19	-	2	0.827221	0.369947	0.532217
ENSG00000176170.14	chr17	+	2	0.826349	0.370196	0.532217
ENSG00000149557.14	chr11	-	4	1.06642	0.370516	0.532217
ENSG00000185010.15	chrX	-	2	0.824518	0.37072	0.532217
ENSG00000215252.11	chr15	-	2	0.821269	0.371652	0.533156
ENSG00000152061.23	chr1	+	3	1.00908	0.372748	0.534328
ENSG00000187778.14	chr12	-	2	0.815361	0.373357	0.5345
ENSG00000156011.17	chr8	-	3	1.00718	0.373425	0.5345
ENSG00000274104.1	chr19	-	2	0.812676	0.374135	0.534737
ENSG00000165192.14	chrX	-	2	0.812777	0.374148	0.534737
ENSG00000186111.11	chr19	-	2	0.807717	0.375578	0.53638
ENSG00000132170.23	chr3	+	2	0.804255	0.376591	0.537426
ENSG00000108691.9	chr17	+	2	0.802404	0.377176	0.537608
ENSG00000185215.11	chr14	+	2	0.801758	0.377323	0.537608
ENSG00000137962.13	chr1	-	2	0.800239	0.37777	0.537608
ENSG00000223695.1	chr22	+	2	0.79891	0.378161	0.537608
ENSG00000104853.16	chr19	+	2	0.798628	0.378245	0.537608
ENSG00000186073.14	chr15	+	2	0.798246	0.3784	0.537608
ENSG00000162434.13	chr1	-	2	0.79672	0.37885	0.53785
ENSG00000165795.23	chr14	-	3	0.990103	0.379544	0.538435
ENSG00000105711.13	chr19	+	2	0.789654	0.380904	0.53965
ENSG00000140859.16	chr16	-	2	0.789523	0.380963	0.53965
ENSG00000122390.19	chr16	+	2	0.78807	0.381376	0.539838
ENSG00000264247.2	chr18	-	2	0.785061	0.382276	0.540712
ENSG00000128487.18	chr17	+	2	0.783902	0.382623	0.540804
ENSG00000167074.15	chr22	+	2	0.77723	0.384631	0.543242
ENSG00000113575.10	chr5	-	2	0.776272	0.384921	0.543251
ENSG00000267082.1	chr19	+	2	0.773948	0.385625	0.543566
ENSG00000103852.13	chr15	-	2	0.773666	0.38571	0.543566
ENSG00000173402.12	chr3	+	2	0.770001	0.386825	0.544736
ENSG00000166272.18	chr10	+	2	0.768393	0.387315	0.545026
ENSG00000132386.11	chr17	+	2	0.765087	0.388326	0.546048
ENSG00000105223.20	chr19	+	3	0.960486	0.390468	0.548594
ENSG00000262660.1	chr17	+	2	0.757345	0.390709	0.548594
ENSG00000108669.16	chr17	-	3	0.952805	0.393355	0.551906
ENSG00000198042.11	chr8	+	2	0.744241	0.394791	0.553516
ENSG00000198842.10	chr1	+	3	0.942492	0.397266	0.556579
ENSG00000165806.21	chr10	+	2	0.73529	0.397616	0.556663
ENSG00000203880.12	chr20	+	2	0.730289	0.399208	0.558483
ENSG00000134504.14	chr18	-	2	0.728915	0.399647	0.55869
ENSG00000183044.12	chr16	+	2	0.727584	0.400113	0.558934
ENSG00000100138.15	chr22	-	3	0.924485	0.404192	0.564222
ENSG00000103496.15	chr16	+	2	0.713711	0.404552	0.564313
ENSG00000184347.15	chr5	-	2	0.710938	0.405496	0.564906
ENSG00000176728.10	chrY	-	2	0.709828	0.405858	0.564906
ENSG00000198336.9	chr17	+	3	0.919728	0.406075	0.564906
ENSG00000226688.7	chr10	-	2	0.708799	0.406155	0.564906
ENSG00000173511.10	chr11	+	2	0.698944	0.409402	0.569009
ENSG00000148219.18	chr9	-	2	0.697492	0.409884	0.569267
ENSG00000109756.9	chr4	+	5	1.00541	0.410614	0.569869
ENSG00000178096.9	chr1	+	2	0.693166	0.411324	0.570441
ENSG00000107897.20	chr10	-	2	0.689256	0.412632	0.571841
ENSG00000245060.8	chr5	+	2	0.688177	0.412994	0.571897
ENSG00000156113.24	chr10	-	2	0.68736	0.413269	0.571897
ENSG00000077684.16	chr4	+	2	0.683467	0.41458	0.573299
ENSG00000187091.14	chr3	-	2	0.678096	0.416401	0.575196
ENSG00000134243.12	chr1	-	3	0.893137	0.416552	0.575196
ENSG00000105204.14	chr19	-	2	0.673243	0.418095	0.576911
ENSG00000173918.15	chr17	+	5	0.986612	0.420574	0.579914
ENSG00000188554.15	chr17	+	2	0.65784	0.423377	0.58336
ENSG00000196504.19	chr2	-	2	0.655718	0.424118	0.583961
ENSG00000188730.5	chr7	+	2	0.651254	0.425684	0.585697
ENSG00000101871.16	chrX	-	2	0.650379	0.425992	0.5857
ENSG00000105607.13	chr19	+	2	0.647237	0.4271	0.586804
ENSG00000091428.18	chr2	+	2	0.64441	0.428123	0.587789
ENSG00000143774.17	chr1	+	3	0.857507	0.431082	0.591428
ENSG00000167740.10	chr17	+	2	0.634276	0.431721	0.591697
ENSG00000175538.11	chr11	-	2	0.632893	0.432218	0.591697
ENSG00000119912.18	chr10	-	2	0.632357	0.432449	0.591697
ENSG00000168488.18	chr16	+	2	0.630952	0.432918	0.591697
ENSG00000177354.12	chr10	+	2	0.630599	0.433083	0.591697
ENSG00000189171.14	chr1	-	2	0.630366	0.43313	0.591697
ENSG00000132466.19	chr4	-	2	0.629011	0.433653	0.59199
ENSG00000204520.14	chr6	+	2	0.622595	0.435989	0.594756
ENSG00000133818.14	chr11	-	2	0.621116	0.436529	0.59487
ENSG00000171631.16	chr11	+	3	0.843458	0.436956	0.59487
ENSG00000170365.10	chr4	+	2	0.619719	0.437003	0.59487
ENSG00000089157.16	chr12	-	2	0.614989	0.438742	0.596709
ENSG00000137075.18	chr9	-	3	0.838673	0.438976	0.596709
ENSG00000101294.18	chr20	+	2	0.611659	0.439972	0.597499
ENSG00000071127.17	chr4	-	3	0.83583	0.44018	0.597499
ENSG00000180155.20	chr8	-	2	0.609417	0.440803	0.597921
ENSG00000139567.13	chr12	+	3	0.830706	0.44236	0.598844
ENSG00000110693.18	chr11	-	2	0.604772	0.442534	0.598844
ENSG00000132507.18	chr17	+	2	0.603573	0.442982	0.598844
ENSG00000138964.17	chr22	+	2	0.603075	0.443169	0.598844
ENSG00000247271.7	chr11	+	2	0.602662	0.44336	0.598844
ENSG00000144476.6	chr2	+	2	0.601689	0.443704	0.598844
ENSG00000154262.13	chr17	-	2	0.601323	0.443862	0.598844
ENSG00000050405.13	chr12	-	2	0.600907	0.443982	0.598844
ENSG00000114126.18	chr3	-	3	0.822618	0.445824	0.600768
ENSG00000100124.15	chr22	-	2	0.595247	0.446116	0.600768
ENSG00000175029.17	chr10	-	2	0.594634	0.446348	0.600768
ENSG00000146083.12	chr5	-	2	0.593322	0.446845	0.601016
ENSG00000166091.21	chr14	+	2	0.588762	0.448581	0.602928
ENSG00000060982.15	chr12	-	2	0.577634	0.452862	0.608256
ENSG00000171914.16	chr15	+	2	0.571312	0.455358	0.610824
ENSG00000143549.21	chr1	-	3	0.800632	0.455411	0.610824
ENSG00000187720.14	chr15	+	2	0.568944	0.456286	0.61157
ENSG00000102967.12	chr16	+	2	0.565476	0.457615	0.612922
ENSG00000111639.8	chr12	-	2	0.563269	0.458486	0.613661
ENSG00000187288.12	chr3	-	2	0.561267	0.459313	0.61434
ENSG00000169499.15	chr8	+	2	0.559216	0.460093	0.614954
ENSG00000117859.19	chr1	+	2	0.550747	0.463481	0.618971
ENSG00000138735.16	chr4	-	2	0.549376	0.464034	0.618971
ENSG00000181409.14	chr17	-	2	0.549294	0.464067	0.618971
ENSG00000076944.16	chr19	+	2	0.54214	0.466966	0.622405
ENSG00000177169.10	chr12	+	2	0.538699	0.468371	0.623845
ENSG00000130558.20	chr9	+	2	0.537706	0.468812	0.623998
ENSG00000136261.15	chr7	+	2	0.535587	0.469682	0.624599
ENSG00000151967.18	chr3	+	2	0.534728	0.470022	0.624599
ENSG00000272288.6	chr6	+	2	0.534149	0.47024	0.624599
ENSG00000246695.8	chr12	-	2	0.530465	0.471763	0.626012
ENSG00000121933.19	chr1	-	3	0.763632	0.471957	0.626012
ENSG00000145703.16	chr5	+	2	0.528712	0.472509	0.626312
ENSG00000080546.13	chr6	-	2	0.526982	0.473209	0.626806
ENSG00000107798.18	chr10	-	2	0.524984	0.474042	0.627476
ENSG00000162670.11	chr1	-	2	0.522535	0.475067	0.628399
ENSG00000178188.14	chr16	+	2	0.520558	0.475897	0.6287
ENSG00000127022.16	chr5	+	2	0.520431	0.47595	0.6287
ENSG00000140350.15	chr15	-	2	0.517741	0.477083	0.629763
ENSG00000124440.16	chr19	+	3	0.744035	0.481014	0.633818
ENSG00000120616.16	chr10	-	2	0.507732	0.481339	0.633818
ENSG00000087074.8	chr19	+	2	0.507586	0.481402	0.633818
ENSG00000157985.19	chr2	+	2	0.507487	0.481477	0.633818
ENSG00000079102.16	chr8	-	2	0.503888	0.482991	0.635375
ENSG00000092841.19	chr12	+	2	0.502894	0.483419	0.635503
ENSG00000170153.11	chr4	-	2	0.497092	0.485934	0.638371
ENSG00000169155.10	chr9	+	2	0.495505	0.486625	0.638842
ENSG00000171877.21	chr15	-	2	0.490551	0.488795	0.641251
ENSG00000154710.18	chr7	+	2	0.483664	0.491839	0.644702
ENSG00000115461.5	chr2	-	2	0.48255	0.492334	0.644702
ENSG00000171425.10	chr19	+	2	0.481816	0.492661	0.644702
ENSG00000158352.17	chrX	-	2	0.481571	0.49277	0.644702
ENSG00000122644.13	chr7	+	2	0.476201	0.495174	0.647406
ENSG00000243156.9	chr22	-	2	0.472936	0.496645	0.648887
ENSG00000181894.15	chr19	-	2	0.471735	0.497188	0.648989
ENSG00000198728.11	chr10	-	2	0.471193	0.497434	0.648989
ENSG00000125733.18	chr19	+	2	0.470521	0.497738	0.648989
ENSG00000083857.14	chr4	-	2	0.466579	0.499546	0.650903
ENSG00000242125.3	chr1	+	2	0.462542	0.501411	0.65289
ENSG00000112893.10	chr5	+	2	0.460499	0.50232	0.653246
ENSG00000131788.16	chr1	-	2	0.459183	0.502926	0.653246
ENSG00000168386.18	chr3	-	2	0.45902	0.503033	0.653246
ENSG00000196230.14	chr6	+	2	0.458921	0.503047	0.653246
ENSG00000100266.19	chr22	-	2	0.456985	0.503943	0.653967
ENSG00000142546.14	chr19	-	2	0.452097	0.506217	0.656473
ENSG00000106052.13	chr7	+	2	0.451145	0.506662	0.656606
ENSG00000119403.15	chr9	-	2	0.445256	0.509429	0.659621
ENSG00000075131.10	chr15	-	2	0.444735	0.509676	0.659621
ENSG00000032444.17	chr19	+	2	0.443396	0.510309	0.659995
ENSG00000145390.11	chr4	+	2	0.440962	0.511464	0.660268
ENSG00000036448.10	chr8	+	3	0.680609	0.511504	0.660268
ENSG00000244274.8	chr20	+	3	0.680511	0.511552	0.660268
ENSG00000179094.16	chr17	-	2	0.438402	0.512684	0.661283
ENSG00000198157.11	chrX	-	2	0.433874	0.514855	0.663509
ENSG00000145391.14	chr4	-	2	0.432719	0.515411	0.663509
ENSG00000173486.14	chr11	+	2	0.432539	0.515498	0.663509
ENSG00000104976.12	chr19	+	2	0.431926	0.515793	0.663509
ENSG00000102226.10	chrX	+	2	0.429377	0.517026	0.664021
ENSG00000163635.20	chr3	+	2	0.4293	0.517064	0.664021
ENSG00000197565.16	chrX	-	2	0.428149	0.517622	0.664021
ENSG00000266094.8	chr1	+	2	0.428051	0.51767	0.664021
ENSG00000185825.17	chrX	-	2	0.427532	0.517922	0.664021
ENSG00000130695.16	chr1	+	2	0.424162	0.519595	0.665721
ENSG00000154309.9	chr1	+	2	0.422576	0.520342	0.666232
ENSG00000083312.18	chr5	+	2	0.419569	0.52182	0.667679
ENSG00000179335.19	chr15	+	2	0.41662	0.523278	0.669098
ENSG00000150527.17	chr14	+	2	0.414983	0.524119	0.669478
ENSG00000170142.12	chr3	+	2	0.414613	0.524273	0.669478
ENSG00000148053.17	chr9	+	2	0.412256	0.525447	0.670414
ENSG00000241058.4	chr10	-	2	0.41142	0.525865	0.670414
ENSG00000130844.19	chr19	+	2	0.41104	0.526055	0.670414
ENSG00000152795.18	chr4	-	2	0.408221	0.527468	0.671507
ENSG00000234438.5	chr15	+	2	0.407714	0.527752	0.671507
ENSG00000160360.13	chr9	+	3	0.647991	0.527963	0.671507
ENSG00000132906.18	chr1	-	2	0.4045	0.529344	0.672524
ENSG00000148985.20	chr11	+	3	0.64507	0.529464	0.672524
ENSG00000106211.10	chr7	+	2	0.402487	0.530392	0.673258
ENSG00000101608.13	chr18	+	2	0.401355	0.530967	0.673542
ENSG00000185624.16	chr17	-	3	0.640796	0.531647	0.673958
ENSG00000112837.17	chr6	-	2	0.399114	0.532081	0.674063
ENSG00000005022.6	chrX	+	2	0.398165	0.532566	0.674232
ENSG00000166402.9	chr11	+	2	0.397315	0.533001	0.674338
ENSG00000133943.21	chr14	+	2	0.396551	0.533393	0.674388
ENSG00000124588.22	chr6	+	2	0.395019	0.53418	0.674939
ENSG00000113758.13	chr5	-	2	0.389016	0.537284	0.67812
ENSG00000124535.16	chr6	+	2	0.388784	0.537404	0.67812
ENSG00000204256.14	chr6	+	3	0.627036	0.538808	0.679168
ENSG00000111912.20	chr6	+	4	0.728517	0.539161	0.679168
ENSG00000108654.16	chr17	-	4	0.728281	0.539298	0.679168
ENSG00000167703.15	chr17	-	2	0.38388	0.539966	0.679563
ENSG00000075239.14	chr11	+	3	0.623923	0.540442	0.679717
ENSG00000134333.14	chr11	+	2	0.381619	0.541183	0.680202
ENSG00000106608.17	chr7	-	2	0.37851	0.542797	0.681498
ENSG00000204217.15	chr2	+	2	0.378029	0.543053	0.681498
ENSG00000063177.13	chr19	-	2	0.3776	0.54328	0.681498
ENSG00000138303.18	chr10	-	3	0.617858	0.543641	0.681505
ENSG00000082641.16	chr17	+	3	0.612362	0.546556	0.684713
ENSG00000171992.13	chr5	+	3	0.611378	0.5471	0.684946
ENSG00000144711.16	chr3	-	3	0.609957	0.547846	0.685433
ENSG00000127084.19	chr9	+	2	0.364818	0.550145	0.687535
ENSG00000170473.17	chr12	-	2	0.364637	0.550243	0.687535
ENSG00000135316.19	chr6	-	2	0.360403	0.552554	0.689973
ENSG00000267107.8	chr19	-	3	0.599378	0.553509	0.690716
ENSG00000141013.17	chr16	+	2	0.35681	0.55453	0.69154
ENSG00000092871.17	chr17	-	2	0.354987	0.555538	0.692347
ENSG00000059691.12	chr4	-	3	0.588486	0.559413	0.696351
ENSG00000133315.12	chr11	-	2	0.347921	0.559477	0.696351
ENSG00000116731.22	chr1	+	2	0.346494	0.56028	0.696898
ENSG00000002933.9	chr7	+	2	0.342864	0.562342	0.69901
ENSG00000079277.22	chr1	-	2	0.336916	0.565722	0.702389
ENSG00000179818.14	chr2	-	2	0.336272	0.566092	0.702389
ENSG00000181031.16	chr17	-	2	0.335732	0.566428	0.702389
ENSG00000162241.12	chr11	-	2	0.334159	0.567308	0.702389
ENSG00000138674.17	chr4	-	2	0.334052	0.56737	0.702389
ENSG00000213722.10	chr6	-	2	0.334002	0.567399	0.702389
ENSG00000167291.16	chr17	-	2	0.333612	0.567624	0.702389
ENSG00000079999.14	chr19	-	2	0.332368	0.568343	0.702825
ENSG00000099260.11	chr1	+	2	0.330725	0.569296	0.7031
ENSG00000060237.19	chr12	+	2	0.330552	0.569396	0.7031
ENSG00000161513.12	chr17	-	2	0.33009	0.569665	0.7031
ENSG00000095794.19	chr10	+	3	0.565072	0.572346	0.705852
ENSG00000122359.18	chr10	-	2	0.325016	0.572631	0.705852
ENSG00000169925.17	chr9	-	2	0.321402	0.574762	0.708025
ENSG00000131149.19	chr16	+	2	0.320256	0.575442	0.708407
ENSG00000108679.13	chr17	-	2	0.319455	0.575918	0.708521
ENSG00000079435.10	chr19	-	2	0.318808	0.576314	0.708521
ENSG00000106348.18	chr7	-	2	0.318236	0.576643	0.708521
ENSG00000107968.10	chr10	+	2	0.316064	0.57794	0.709661
ENSG00000184060.11	chr17	+	2	0.312016	0.580374	0.712034
ENSG00000272391.6	chr7	-	2	0.310693	0.581174	0.712034
ENSG00000154358.23	chr1	+	3	0.549011	0.581385	0.712034
ENSG00000119139.21	chr9	+	3	0.548401	0.581729	0.712034
ENSG00000160209.19	chr21	+	3	0.548373	0.581729	0.712034
ENSG00000148700.15	chr10	+	3	0.545288	0.583484	0.712716
ENSG00000112773.16	chr6	-	2	0.306072	0.583985	0.712716
ENSG00000075711.21	chr3	-	2	0.305821	0.584163	0.712716
ENSG00000010803.16	chr1	-	2	0.305763	0.584174	0.712716
ENSG00000166398.14	chr19	+	2	0.305337	0.584435	0.712716
ENSG00000162591.16	chr1	-	2	0.305204	0.584516	0.712716
ENSG00000111640.15	chr12	+	3	0.537443	0.58797	0.716266
ENSG00000108823.16	chr17	+	2	0.298845	0.588438	0.716266
ENSG00000170989.10	chr1	+	2	0.298668	0.588548	0.716266
ENSG00000155096.14	chr8	-	2	0.297893	0.58903	0.716398
ENSG00000160972.9	chr8	+	2	0.295113	0.59079	0.718083
ENSG00000161642.18	chr12	-	2	0.293347	0.591874	0.718945
ENSG00000182796.14	chr12	+	2	0.292269	0.592552	0.719313
ENSG00000135387.21	chr11	+	2	0.289729	0.594157	0.720805
ENSG00000168000.15	chr11	-	2	0.286777	0.596034	0.721689
ENSG00000110665.12	chr11	-	2	0.286336	0.596339	0.721689
ENSG00000177098.9	chr11	-	2	0.286019	0.596518	0.721689
ENSG00000172346.15	chr22	+	2	0.284839	0.597273	0.721689
ENSG00000166278.15	chr6	+	2	0.284081	0.597759	0.721689
ENSG00000086758.16	chrX	-	2	0.283227	0.598308	0.721689
ENSG00000182667.14	chr11	+	2	0.2832	0.598325	0.721689
ENSG00000221983.8	chr19	+	2	0.283008	0.598449	0.721689
ENSG00000151503.13	chr11	-	2	0.282796	0.598585	0.721689
ENSG00000128563.13	chr7	+	2	0.282209	0.598963	0.721689
ENSG00000115649.16	chr2	-	2	0.282114	0.599025	0.721689
ENSG00000179632.10	chr8	+	2	0.280912	0.5998	0.721919
ENSG00000131697.18	chr1	-	2	0.280255	0.600226	0.721919
ENSG00000228300.14	chr19	+	2	0.280057	0.600354	0.721919
ENSG00000198853.12	chr9	+	2	0.279526	0.600721	0.721919
ENSG00000182903.16	chr4	-	2	0.27664	0.602576	0.723695
ENSG00000151247.13	chr4	-	2	0.272496	0.605294	0.726505
ENSG00000182871.16	chr21	+	2	0.270991	0.606288	0.726848
ENSG00000138085.17	chr2	+	2	0.270494	0.606617	0.726848
ENSG00000089876.12	chr10	-	2	0.269946	0.60698	0.726848
ENSG00000139160.13	chr12	+	2	0.269771	0.607097	0.726848
ENSG00000124181.14	chr20	+	2	0.268009	0.608268	0.727797
ENSG00000197694.18	chr9	+	2	0.266339	0.609382	0.728676
ENSG00000168646.13	chr17	-	2	0.265373	0.61003	0.728995
ENSG00000171408.14	chr6	+	2	0.261531	0.612617	0.731631
ENSG00000186020.13	chr19	-	2	0.258001	0.615016	0.734039
ENSG00000173598.14	chr12	+	2	0.255578	0.616675	0.735113
ENSG00000100243.21	chr22	-	2	0.255348	0.616855	0.735113
ENSG00000134287.10	chr12	-	2	0.253966	0.617784	0.735113
ENSG00000198695.2	chrM	-	2	0.25358	0.618063	0.735113
ENSG00000146701.12	chr7	+	2	0.2535	0.618106	0.735113
ENSG00000204954.10	chr12	-	2	0.25334	0.618216	0.735113
ENSG00000141736.14	chr17	+	2	0.251068	0.619789	0.736527
ENSG00000104325.7	chr8	+	2	0.248264	0.621742	0.738391
ENSG00000111642.16	chr12	-	3	0.473867	0.625684	0.742144
ENSG00000255399.4	chr12	+	2	0.242535	0.625778	0.742144
ENSG00000166313.19	chr11	-	2	0.242133	0.626063	0.742144
ENSG00000172380.6	chr1	-	2	0.238373	0.628747	0.744299
ENSG00000158417.11	chr2	+	2	0.238271	0.62882	0.744299
ENSG00000113441.16	chr5	+	2	0.237958	0.629045	0.744299
ENSG00000159592.11	chr1	-	3	0.467054	0.629873	0.744819
ENSG00000133619.17	chr7	+	2	0.233996	0.631904	0.746761
ENSG00000130811.12	chr19	-	2	0.233393	0.632342	0.746818
ENSG00000111846.19	chr6	+	3	0.46229	0.632819	0.746921
ENSG00000185973.12	chrX	-	2	0.230267	0.634624	0.74859
ENSG00000065802.12	chr2	+	2	0.222321	0.640529	0.754393
ENSG00000132635.17	chr20	-	2	0.221687	0.640985	0.754393
ENSG00000277443.3	chr6	+	2	0.221591	0.641056	0.754393
ENSG00000037241.7	chr5	+	2	0.221528	0.641116	0.754393
ENSG00000179222.18	chrX	+	2	0.219906	0.642323	0.75535
ENSG00000181830.9	chr11	+	2	0.218757	0.643191	0.755665
ENSG00000106565.18	chr7	-	2	0.218535	0.643379	0.755665
ENSG00000184113.9	chr22	-	2	0.217569	0.644091	0.756038
ENSG00000145779.8	chr5	+	2	0.21622	0.645117	0.756779
ENSG00000073578.17	chr5	+	3	0.441128	0.646082	0.757448
ENSG00000125107.19	chr16	-	2	0.213739	0.647013	0.758077
ENSG00000101605.13	chr18	-	2	0.21238	0.648077	0.75886
ENSG00000113312.11	chr5	+	2	0.211082	0.649079	0.759356
ENSG00000008294.21	chr17	-	2	0.210779	0.649293	0.759356
ENSG00000166228.9	chr10	-	2	0.210134	0.649793	0.759477
ENSG00000168556.7	chr4	+	2	0.208338	0.651188	0.760645
ENSG00000167543.16	chr17	+	3	0.430819	0.652649	0.761887
ENSG00000167815.12	chr19	-	2	0.20523	0.653621	0.762333
ENSG00000100628.12	chr14	-	2	0.204969	0.653825	0.762333
ENSG00000048540.15	chr12	-	2	0.203995	0.654593	0.762764
ENSG00000126804.13	chr14	+	2	0.20306	0.655332	0.763161
ENSG00000111245.17	chr12	-	3	0.425026	0.65638	0.763918
ENSG00000109452.12	chr4	-	2	0.199417	0.65823	0.765607
ENSG00000168237.18	chr3	+	2	0.194509	0.662186	0.769742
ENSG00000100284.22	chr22	+	2	0.193738	0.662813	0.769998
ENSG00000117399.14	chr1	+	2	0.193251	0.66321	0.769998
ENSG00000143353.12	chr1	+	2	0.190747	0.665259	0.77191
ENSG00000135077.9	chr5	-	3	0.410262	0.66595	0.772245
ENSG00000057294.15	chr12	-	2	0.189003	0.666714	0.772663
ENSG00000166206.15	chr15	-	2	0.188241	0.667326	0.772906
ENSG00000102575.13	chr19	-	2	0.186942	0.668404	0.773687
ENSG00000198482.14	chr19	+	2	0.186445	0.668818	0.773699
ENSG00000110811.20	chr12	+	2	0.185615	0.66951	0.773948
ENSG00000102125.16	chrX	+	2	0.185152	0.669896	0.773948
ENSG00000120690.16	chr13	-	2	0.184737	0.670244	0.773948
ENSG00000198796.7	chr18	-	2	0.183188	0.671544	0.774983
ENSG00000115365.12	chr2	-	2	0.18159	0.672893	0.776072
ENSG00000134201.12	chr1	+	2	0.177864	0.676064	0.779261
ENSG00000173406.16	chr1	-	2	0.177293	0.676553	0.779357
ENSG00000165458.14	chr11	+	2	0.176467	0.677264	0.779707
ENSG00000165810.17	chr5	+	3	0.391755	0.678173	0.780208
ENSG00000101224.18	chr20	+	2	0.175019	0.678512	0.780208
ENSG00000137497.18	chr11	-	4	0.505803	0.679814	0.781236
ENSG00000147255.19	chrX	-	2	0.170745	0.682235	0.783549
ENSG00000178573.7	chr16	-	2	0.169704	0.68315	0.78413
ENSG00000169071.15	chr9	-	2	0.16578	0.686628	0.787509
ENSG00000146729.10	chr7	+	2	0.165294	0.687063	0.787509
ENSG00000145819.18	chr5	+	2	0.164901	0.687432	0.787509
ENSG00000133067.18	chr1	+	3	0.377505	0.687736	0.787509
ENSG00000100418.8	chr22	-	2	0.160081	0.691768	0.791653
ENSG00000159200.18	chr21	-	2	0.158047	0.693645	0.793328
ENSG00000126001.16	chr20	+	2	0.157518	0.694114	0.793391
ENSG00000100316.16	chr22	-	2	0.156856	0.694724	0.793615
ENSG00000170175.11	chr17	+	3	0.362077	0.698253	0.797172
ENSG00000121964.14	chr2	-	2	0.150379	0.700768	0.799567
ENSG00000176946.12	chr2	-	2	0.14818	0.70287	0.801489
ENSG00000090924.15	chr19	+	2	0.146251	0.704698	0.803096
ENSG00000084674.15	chr2	-	2	0.145246	0.705681	0.80348
ENSG00000136895.19	chr9	+	2	0.144605	0.706284	0.80348
ENSG00000164591.14	chr5	+	2	0.144307	0.706572	0.80348
ENSG00000137496.18	chr11	+	2	0.144164	0.70671	0.80348
ENSG00000170871.12	chr4	+	2	0.143018	0.707832	0.80381
ENSG00000105810.10	chr7	-	2	0.143001	0.707839	0.80381
ENSG00000072310.17	chr17	-	2	0.137701	0.713064	0.808942
ENSG00000173928.4	chr19	+	2	0.137193	0.713553	0.808942
ENSG00000100354.21	chr22	+	2	0.137122	0.713624	0.808942
ENSG00000135905.20	chr2	-	2	0.136452	0.714292	0.809222
ENSG00000118137.10	chr11	-	2	0.133918	0.716853	0.810855
ENSG00000135447.17	chr12	-	2	0.133735	0.717037	0.810855
ENSG00000114854.8	chr3	-	2	0.133697	0.717075	0.810855
ENSG00000172613.8	chr11	+	2	0.133086	0.717679	0.810855
ENSG00000005238.20	chr9	-	2	0.132559	0.718212	0.810855
ENSG00000198624.13	chr5	-	2	0.132502	0.718271	0.810855
ENSG00000166508.18	chr7	-	2	0.131598	0.719191	0.811416
ENSG00000110446.12	chr11	-	2	0.128896	0.721961	0.813625
ENSG00000163539.17	chr3	-	3	0.328132	0.721997	0.813625
ENSG00000136143.16	chr13	-	2	0.12801	0.722878	0.81414
ENSG00000101997.13	chrX	+	2	0.126688	0.724251	0.814903
ENSG00000123154.12	chr19	+	3	0.324743	0.724405	0.814903
ENSG00000078808.19	chr1	-	2	0.125815	0.725162	0.815276
ENSG00000133027.18	chr17	-	2	0.123022	0.728102	0.818102
ENSG00000124313.18	chrX	-	2	0.121516	0.729702	0.81942
ENSG00000017260.20	chr3	+	2	0.120914	0.730346	0.819663
ENSG00000130779.22	chr12	-	2	0.120004	0.731321	0.820277
ENSG00000165410.15	chr14	-	2	0.116597	0.735025	0.82395
ENSG00000171700.14	chr20	-	2	0.115569	0.736135	0.824712
ENSG00000255248.9	chr11	-	3	0.307181	0.737059	0.825109
ENSG00000100897.18	chr14	+	2	0.114465	0.73735	0.825109
ENSG00000246273.8	chr11	+	2	0.113676	0.738222	0.825603
ENSG00000076108.12	chr12	-	2	0.113155	0.738799	0.825767
ENSG00000122986.14	chr12	-	2	0.112424	0.739621	0.826205
ENSG00000187239.17	chr9	-	2	0.11135	0.740811	0.82665
ENSG00000154153.14	chr5	-	2	0.111048	0.741164	0.82665
ENSG00000126883.17	chr9	+	2	0.110903	0.741313	0.82665
ENSG00000138640.15	chr4	-	2	0.110119	0.742195	0.827153
ENSG00000084090.14	chr2	-	2	0.109164	0.743288	0.82789
ENSG00000103043.15	chr16	-	2	0.10654	0.746266	0.830486
ENSG00000104872.11	chr19	-	2	0.106287	0.746556	0.830486
ENSG00000123358.20	chr12	+	3	0.293723	0.746918	0.830486
ENSG00000186635.15	chr11	-	3	0.290973	0.748942	0.831558
ENSG00000058262.10	chr3	+	2	0.10384	0.749386	0.831558
ENSG00000114062.22	chr15	-	2	0.103671	0.74959	0.831558
ENSG00000164850.15	chr7	+	2	0.103643	0.749616	0.831558
ENSG00000047315.17	chr4	+	2	0.102336	0.751145	0.832473
ENSG00000149269.10	chr11	-	2	0.102196	0.751309	0.832473
ENSG00000162734.13	chr1	+	2	0.0991006	0.754976	0.836053
ENSG00000168283.14	chr10	+	2	0.0961981	0.758472	0.83944
ENSG00000156709.15	chrX	-	3	0.275226	0.760679	0.841396
ENSG00000012223.13	chr3	-	2	0.0930509	0.762329	0.842737
ENSG00000135218.19	chr7	+	7	0.552849	0.766655	0.84703
ENSG00000228794.10	chr1	+	2	0.0876296	0.769145	0.849292
ENSG00000273899.5	chr22	+	2	0.0865248	0.770562	0.850367
ENSG00000215386.13	chr21	+	3	0.260224	0.772039	0.851507
ENSG00000140939.14	chr16	+	2	0.0847863	0.772812	0.851869
ENSG00000168003.18	chr11	+	2	0.0829377	0.775231	0.853915
ENSG00000153904.21	chr1	-	2	0.0826988	0.775558	0.853915
ENSG00000073711.11	chr3	+	2	0.0812743	0.777446	0.855273
ENSG00000167705.12	chr17	-	2	0.0810962	0.777683	0.855273
ENSG00000069667.16	chr15	-	2	0.0798479	0.779342	0.856606
ENSG00000165868.16	chr10	-	2	0.0764703	0.783936	0.861162
ENSG00000173638.19	chr21	-	2	0.0739786	0.787395	0.864467
ENSG00000172262.11	chr5	+	3	0.238635	0.7887	0.865405
ENSG00000136758.19	chr10	-	2	0.0682978	0.795523	0.872392
ENSG00000198755.11	chr6	+	2	0.0664989	0.798173	0.873978
ENSG00000008256.16	chr7	-	2	0.0663028	0.798464	0.873978
ENSG00000187773.9	chr18	-	2	0.0662788	0.79851	0.873978
ENSG00000239305.7	chr2	-	2	0.0658453	0.799145	0.873978
ENSG00000017797.13	chr18	+	2	0.0657763	0.799247	0.873978
ENSG00000128918.15	chr15	-	3	0.221934	0.801846	0.875434
ENSG00000187535.14	chr16	-	2	0.0637815	0.802248	0.875434
ENSG00000105409.19	chr19	-	2	0.0636943	0.80239	0.875434
ENSG00000073670.14	chr17	+	2	0.0636781	0.802405	0.875434
ENSG00000135185.12	chr7	-	2	0.0632322	0.803083	0.875483
ENSG00000268858.2	chr20	-	2	0.0630487	0.803363	0.875483
ENSG00000107262.26	chr9	-	2	0.061525	0.805703	0.877534
ENSG00000130528.12	chr19	-	2	0.0608304	0.806784	0.8782
ENSG00000224318.6	chr3	-	2	0.0605478	0.80723	0.8782
ENSG00000181513.15	chr17	+	2	0.0599172	0.808206	0.878763
ENSG00000104490.18	chr8	-	2	0.0591983	0.809337	0.879494
ENSG00000127946.17	chr7	-	2	0.0582676	0.810811	0.880188
ENSG00000175699.15	chr14	+	2	0.058174	0.81097	0.880188
ENSG00000068308.14	chrX	-	2	0.0579288	0.811351	0.880188
ENSG00000177548.13	chr16	-	2	0.0570663	0.812733	0.881189
ENSG00000132478.10	chr17	+	2	0.0559424	0.814551	0.882661
ENSG00000241837.7	chr21	-	3	0.20483	0.815547	0.883241
ENSG00000128585.18	chr7	+	2	0.0548719	0.816301	0.883558
ENSG00000161203.13	chr3	+	2	0.0531984	0.819072	0.885586
ENSG00000079805.18	chr19	+	2	0.0531292	0.819197	0.885586
ENSG00000203739.4	chr1	-	2	0.0529066	0.81956	0.885586
ENSG00000075651.16	chr3	-	2	0.0516532	0.821672	0.886472
ENSG00000093144.19	chr6	-	2	0.0515325	0.821877	0.886472
ENSG00000196914.9	chr11	+	2	0.0513563	0.822176	0.886472
ENSG00000138639.18	chr4	+	2	0.0513312	0.822228	0.886472
ENSG00000163347.6	chr3	-	2	0.0506223	0.823429	0.887268
ENSG00000062582.14	chr7	-	2	0.0495616	0.825257	0.88828
ENSG00000152242.11	chr18	+	2	0.04954	0.825295	0.88828
ENSG00000183072.10	chr5	-	2	0.0478095	0.828323	0.891039
ENSG00000182957.16	chr13	+	2	0.0466935	0.830306	0.892672
ENSG00000177628.16	chr1	-	2	0.0452004	0.832998	0.894639
ENSG00000073417.15	chr15	+	2	0.0451619	0.833068	0.894639
ENSG00000168309.18	chr3	-	3	0.182208	0.834047	0.895188
ENSG00000116675.16	chr1	+	2	0.0439345	0.835318	0.896051
ENSG00000166292.12	chr17	-	2	0.0436379	0.835867	0.896139
ENSG00000101639.18	chr18	+	2	0.0421167	0.838711	0.898686
ENSG00000125730.17	chr19	-	2	0.0413734	0.84012	0.899693
ENSG00000181666.18	chr19	+	2	0.0401645	0.842441	0.901675
ENSG00000057657.17	chr6	+	2	0.0392596	0.844202	0.903056
ENSG00000139842.15	chr13	+	2	0.037792	0.847103	0.90532
ENSG00000168734.14	chr20	+	2	0.037712	0.847263	0.90532
ENSG00000225377.6	chr20	-	2	0.0368466	0.849003	0.906675
ENSG00000187498.16	chr13	-	2	0.0358446	0.851052	0.908358
ENSG00000143401.15	chr1	-	2	0.0341401	0.854587	0.911623
ENSG00000110047.18	chr11	-	2	0.0324081	0.858282	0.914439
ENSG00000128789.21	chr18	+	2	0.0321862	0.858763	0.914439
ENSG00000138162.19	chr10	+	4	0.253048	0.858847	0.914439
ENSG00000175216.15	chr11	-	2	0.0320153	0.859134	0.914439
ENSG00000156650.14	chr10	+	2	0.0315478	0.860155	0.915018
ENSG00000182022.18	chr10	-	2	0.0311275	0.86108	0.915494
ENSG00000118689.15	chr6	+	2	0.0306746	0.862083	0.915669
ENSG00000165929.13	chr14	-	2	0.0306246	0.862199	0.915669
ENSG00000164091.12	chr3	-	2	0.0300769	0.863419	0.915974
ENSG00000104205.16	chr8	+	2	0.0300672	0.863441	0.915974
ENSG00000163694.15	chr4	-	2	0.0294088	0.86493	0.916904
ENSG00000135241.17	chr7	-	2	0.0292575	0.865274	0.916904
ENSG00000093072.18	chr22	-	2	0.0287873	0.866357	0.917132
ENSG00000119640.9	chr14	-	2	0.028555	0.866885	0.917132
ENSG00000135778.12	chr1	+	2	0.0285382	0.866924	0.917132
ENSG00000140718.21	chr16	+	2	0.0268316	0.870927	0.9199
ENSG00000130985.17	chrX	+	2	0.0267964	0.871011	0.9199
ENSG00000067141.17	chr15	+	2	0.0267799	0.87105	0.9199
ENSG00000143740.15	chr1	+	3	0.138013	0.871459	0.9199
ENSG00000075420.13	chr3	+	2	0.0256775	0.873708	0.921449
ENSG00000136715.19	chr2	-	2	0.0256041	0.873887	0.921449
ENSG00000119927.14	chr10	-	2	0.0247846	0.875911	0.923023
ENSG00000150401.15	chr13	-	2	0.0243418	0.877015	0.923023
ENSG00000149187.18	chr11	-	2	0.024261	0.877217	0.923023
ENSG00000160408.15	chr9	-	2	0.0242185	0.877318	0.923023
ENSG00000122550.18	chr7	+	2	0.0240182	0.877828	0.923023
ENSG00000143632.14	chr1	-	2	0.0238445	0.878267	0.923023
ENSG00000184220.12	chr3	+	2	0.0235108	0.879115	0.923408
ENSG00000175832.13	chr17	-	2	0.023158	0.880012	0.923844
ENSG00000130175.10	chr19	+	2	0.0226456	0.881337	0.924729
ENSG00000112576.13	chr6	-	2	0.0219822	0.88308	0.926052
ENSG00000135926.15	chr2	-	4	0.21673	0.884404	0.926933
ENSG00000117419.16	chr1	-	2	0.0207907	0.886264	0.928375
ENSG00000067208.14	chr1	-	2	0.0199202	0.888654	0.93037
ENSG00000170439.7	chr12	+	2	0.0189695	0.891326	0.932275
ENSG00000108622.11	chr17	-	2	0.0189275	0.891445	0.932275
ENSG00000139323.14	chr12	-	2	0.0184704	0.892756	0.933137
ENSG00000017427.17	chr12	-	2	0.0177848	0.894758	0.93472
ENSG00000108219.15	chr10	+	2	0.017226	0.89641	0.935457
ENSG00000182899.17	chr3	+	2	0.017216	0.896439	0.935457
ENSG00000198964.14	chr10	-	2	0.0167816	0.897746	0.936293
ENSG00000133460.19	chr22	+	2	0.0165636	0.898409	0.936293
ENSG00000168214.21	chr4	+	2	0.016407	0.898888	0.936293
ENSG00000170619.10	chr8	-	2	0.0163076	0.899193	0.936293
ENSG00000197879.17	chr17	-	3	0.101006	0.904133	0.940926
ENSG00000249307.7	chr4	+	2	0.0145657	0.904705	0.941011
ENSG00000179348.12	chr3	-	2	0.0143317	0.905465	0.941291
ENSG00000109171.15	chr4	+	2	0.0138452	0.907076	0.942247
ENSG00000169519.21	chr11	+	2	0.0137287	0.907466	0.942247
ENSG00000143554.14	chr1	+	2	0.0136119	0.907858	0.942247
ENSG00000107104.20	chr9	+	2	0.0133155	0.908862	0.942482
ENSG00000140199.13	chr15	-	2	0.0132554	0.909067	0.942482
ENSG00000162819.12	chr1	+	2	0.0128779	0.910366	0.94284
ENSG00000095066.12	chr19	-	3	0.0940088	0.910454	0.94284
ENSG00000235927.4	chr1	-	2	0.012729	0.910888	0.94284
ENSG00000142507.10	chr17	+	2	0.0122428	0.912594	0.944097
ENSG00000188677.15	chr22	+	2	0.0115059	0.915259	0.946343
ENSG00000250644.3	chr11	-	2	0.0111036	0.916744	0.947195
ENSG00000046653.15	chrX	-	2	0.0110164	0.91707	0.947195
ENSG00000136710.10	chr2	-	2	0.0108467	0.917709	0.947345
ENSG00000188938.17	chr9	-	3	0.0852766	0.918407	0.947555
ENSG00000173848.19	chr10	+	2	0.0098711	0.921484	0.950218
ENSG00000242259.9	chr22	-	2	0.00961732	0.922496	0.950751
ENSG00000173272.16	chr2	-	2	0.00839328	0.927585	0.955095
ENSG00000150630.4	chr4	-	2	0.00833427	0.927835	0.955095
ENSG00000113578.18	chr5	-	2	0.00823731	0.928255	0.955095
ENSG00000068745.15	chr3	-	3	0.0740885	0.928703	0.955095
ENSG00000140795.13	chr16	-	4	0.142417	0.934117	0.960149
ENSG00000072609.18	chr12	-	2	0.00666953	0.935425	0.960978
ENSG00000232310.8	chr6	-	2	0.00627538	0.937358	0.962448
ENSG00000127870.17	chr13	-	2	0.00587878	0.939366	0.962578
ENSG00000065989.16	chr19	+	2	0.00554218	0.941124	0.962578
ENSG00000198105.16	chr10	-	2	0.00551216	0.941283	0.962578
ENSG00000135090.14	chr12	-	2	0.00548659	0.941419	0.962578
ENSG00000203485.14	chr14	+	2	0.00547955	0.941457	0.962578
ENSG00000157873.18	chr1	+	2	0.00547692	0.941471	0.962578
ENSG00000189403.15	chr13	-	4	0.130421	0.941624	0.962578
ENSG00000147862.17	chr9	-	2	0.0054477	0.941627	0.962578
ENSG00000286054.1	chr21	+	2	0.00537796	0.942001	0.962578
ENSG00000131018.24	chr6	-	4	0.125325	0.944752	0.964874
ENSG00000128739.23	chr15	+	3	0.0538663	0.94762	0.967289
ENSG00000101191.17	chr20	-	2	0.00408365	0.949449	0.968204
ENSG00000189308.11	chr4	-	2	0.00407102	0.949527	0.968204
ENSG00000152082.15	chr2	+	2	0.00389233	0.950648	0.968445
ENSG00000052126.15	chr12	+	2	0.0038174	0.951122	0.968445
ENSG00000137449.17	chr4	+	2	0.00379317	0.951277	0.968445
ENSG00000147130.14	chrX	-	2	0.00362512	0.952368	0.96904
ENSG00000168824.14	chr4	+	2	0.00351825	0.953076	0.969229
ENSG00000178031.18	chr9	+	2	0.00339832	0.95388	0.969229
ENSG00000127914.19	chr7	+	2	0.00337042	0.954069	0.969229
ENSG00000140403.12	chr15	+	2	0.00314097	0.955661	0.970332
ENSG00000123124.14	chr8	+	2	0.00306614	0.956192	0.970357
ENSG00000198521.12	chr19	-	2	0.0029922	0.95672	0.97038
ENSG00000136160.17	chr13	-	2	0.00278762	0.958225	0.971009
ENSG00000247596.10	chr3	-	2	0.00273114	0.958652	0.971009
ENSG00000204634.13	chr2	-	2	0.00267044	0.959113	0.971009
ENSG00000277791.5	chr17	+	2	0.00263762	0.959365	0.971009
ENSG00000165269.13	chr9	-	2	0.00233422	0.961772	0.972524
ENSG00000141127.15	chr17	+	2	0.00232125	0.961876	0.972524
ENSG00000126456.16	chr19	-	2	0.00222992	0.962633	0.972776
ENSG00000084093.19	chr4	+	2	0.00207314	0.963969	0.973614
ENSG00000250159.7	chr5	-	2	0.00163231	0.968026	0.977197
ENSG00000136925.15	chr9	-	2	0.00144964	0.969869	0.978043
ENSG00000145016.16	chr3	-	2	0.0014112	0.97027	0.978043
ENSG00000198160.15	chr1	+	2	0.00139938	0.970394	0.978043
ENSG00000116922.14	chr1	-	2	0.00103719	0.97451	0.981676
ENSG00000136205.17	chr7	-	3	0.0244433	0.975866	0.982525
ENSG00000144524.18	chr2	+	2	0.00088364	0.976472	0.98262
ENSG00000075914.13	chr3	+	2	0.000796014	0.977669	0.983308
ENSG00000143702.16	chr1	-	2	0.000642347	0.979939	0.985075
ENSG00000127472.11	chr1	+	2	0.000552378	0.981397	0.986024
ENSG00000173281.5	chr8	-	2	0.000397827	0.984213	0.987659
ENSG00000163697.17	chr4	-	3	0.0156068	0.98452	0.987659
ENSG00000186815.13	chr12	+	2	0.000360015	0.984982	0.987659
ENSG00000163072.16	chr2	+	2	0.000340998	0.985383	0.987659
ENSG00000067064.12	chr10	-	2	0.000330983	0.985599	0.987659
ENSG00000237125.11	chr4	+	3	0.0107679	0.989292	0.990842
ENSG00000108953.17	chr17	-	2	9.96938e-05	0.992096	0.993132
ENSG00000196576.16	chr22	-	2	5.90473e-05	0.993917	0.994436
ENSG00000170348.9	chr14	-	2	2.58545e-05	0.995975	0.995975

## Sheet: CAGE.DPU.F.Healthy.Ventricle
geneId	cluster_chr	cluster_strand	NExons	gene.F	P.Value	FDR
ENSG00000211445.12	chr5	+	3	75.1085	6.24508e-17	1.19781e-13
ENSG00000153187.20	chr1	-	4	36.8416	8.44787e-15	6.63364e-12
ENSG00000174437.17	chr12	+	7	17.4411	1.20012e-14	6.63364e-12
ENSG00000101160.15	chr20	-	3	57.5882	1.38345e-14	6.63364e-12
ENSG00000140416.23	chr15	+	7	17.1929	1.97659e-14	7.5822e-12
ENSG00000159840.16	chr7	+	3	53.3985	5.91374e-14	1.89043e-11
ENSG00000204628.12	chr5	-	5	24.5628	6.92682e-14	1.89795e-11
ENSG00000087460.28	chr20	+	5	23.248	2.81359e-13	6.74558e-11
ENSG00000156467.10	chr8	-	3	46.9382	7.34285e-13	1.56484e-10
ENSG00000167658.16	chr19	-	3	46.2782	8.33875e-13	1.59937e-10
ENSG00000162614.19	chr1	+	3	44.5804	1.62583e-12	2.83486e-10
ENSG00000112936.19	chr5	+	4	28.3946	2.04579e-12	3.26985e-10
ENSG00000130522.6	chr19	-	2	93.5513	3.32012e-12	4.89846e-10
ENSG00000020577.14	chr14	+	5	20.4566	4.11272e-12	5.63442e-10
ENSG00000135404.12	chr12	-	4	26.8528	6.10193e-12	7.80234e-10
ENSG00000166681.14	chrX	+	2	88.7902	6.58689e-12	7.89603e-10
ENSG00000140264.21	chr15	+	3	40.6735	8.02518e-12	9.05429e-10
ENSG00000143198.13	chr1	+	3	39.8371	1.14265e-11	1.21756e-09
ENSG00000110955.9	chr12	-	3	39.5268	1.30413e-11	1.31648e-09
ENSG00000099875.16	chr19	-	2	82.33	1.92709e-11	1.84808e-09
ENSG00000131730.16	chr5	+	3	38.1021	2.41119e-11	2.20222e-09
ENSG00000110651.12	chr11	+	3	37.0259	3.86924e-11	3.37327e-09
ENSG00000205542.11	chrX	+	2	76.7586	5.09589e-11	4.24953e-09
ENSG00000119729.12	chr2	+	3	36.0675	5.93389e-11	4.71882e-09
ENSG00000100097.12	chr22	+	3	35.9877	6.1507e-11	4.71882e-09
ENSG00000078114.19	chr10	-	7	12.3333	6.61351e-11	4.87873e-09
ENSG00000130255.13	chr19	+	2	74.7999	7.25287e-11	5.15222e-09
ENSG00000197746.14	chr10	-	3	35.2991	8.39869e-11	5.7531e-09
ENSG00000172270.22	chr19	+	5	17.1116	1.51441e-10	1.0016e-08
ENSG00000112531.17	chr6	+	2	69.4939	1.94672e-10	1.2446e-08
ENSG00000166710.21	chr15	+	2	67.7498	2.72153e-10	1.68384e-08
ENSG00000175334.8	chr11	+	2	65.5184	4.21176e-10	2.52443e-08
ENSG00000197182.14	chr22	+	3	31.4311	5.15201e-10	2.97314e-08
ENSG00000198125.13	chr22	-	5	16.0118	5.27042e-10	2.97314e-08
ENSG00000154556.18	chr4	-	7	11.0569	6.80643e-10	3.72992e-08
ENSG00000132819.17	chr20	+	2	62.9195	7.08748e-10	3.77605e-08
ENSG00000100412.17	chr22	+	2	59.3763	1.47257e-09	7.63349e-08
ENSG00000226306.6	chr5	+	2	59.0921	1.56332e-09	7.89064e-08
ENSG00000145860.12	chr5	-	2	58.1789	1.89664e-09	9.3276e-08
ENSG00000004776.13	chr19	-	2	58.3449	2.04871e-09	9.82357e-08
ENSG00000167978.17	chr16	+	4	19.2404	2.237e-09	1.04648e-07
ENSG00000038382.20	chr5	+	3	28.2256	2.53343e-09	1.15693e-07
ENSG00000197111.16	chr12	+	3	28.1307	2.6594e-09	1.18621e-07
ENSG00000074416.14	chr3	-	2	56.3016	2.83819e-09	1.23719e-07
ENSG00000109971.14	chr11	-	3	27.679	3.35346e-09	1.42932e-07
ENSG00000135390.21	chr12	-	3	27.4862	3.70455e-09	1.54464e-07
ENSG00000124380.11	chr2	+	2	53.585	5.15884e-09	2.10525e-07
ENSG00000163110.15	chr4	+	3	26.7393	5.46517e-09	2.18379e-07
ENSG00000072778.20	chr17	+	4	17.9605	6.6383e-09	2.59842e-07
ENSG00000168958.20	chr2	+	2	51.5062	8.24758e-09	3.16377e-07
ENSG00000135821.19	chr1	-	2	51.4163	8.41872e-09	3.1661e-07
ENSG00000172638.13	chr11	-	3	25.7511	9.21555e-09	3.39912e-07
ENSG00000138162.19	chr10	+	4	17.5341	9.60311e-09	3.41895e-07
ENSG00000132471.12	chr17	-	2	50.7857	9.72836e-09	3.41895e-07
ENSG00000205268.11	chr8	-	2	50.752	9.80408e-09	3.41895e-07
ENSG00000068383.19	chr10	+	2	49.4365	1.33016e-08	4.55581e-07
ENSG00000026025.16	chr10	+	3	24.9329	1.43054e-08	4.81364e-07
ENSG00000182326.15	chr12	+	2	48.8063	1.54194e-08	5.09903e-07
ENSG00000115641.19	chr2	-	3	24.7539	1.7694e-08	5.75205e-07
ENSG00000075624.17	chr7	-	2	47.8531	1.932e-08	6.17597e-07
ENSG00000231500.7	chr6	+	2	48.0975	2.11083e-08	6.63702e-07
ENSG00000167863.12	chr17	-	2	47.0161	2.35998e-08	7.30073e-07
ENSG00000100201.23	chr22	-	2	46.882	2.4373e-08	7.42021e-07
ENSG00000111961.18	chr6	+	3	23.8337	2.61e-08	7.82184e-07
ENSG00000139644.13	chr12	+	2	46.4148	2.72802e-08	8.04977e-07
ENSG00000241837.7	chr21	-	3	23.5412	3.06939e-08	8.91985e-07
ENSG00000175084.12	chr2	+	4	16.3817	3.12224e-08	8.938e-07
ENSG00000011465.18	chr12	-	5	12.5801	3.21091e-08	9.02272e-07
ENSG00000112992.18	chr5	+	2	45.6993	3.24592e-08	9.02272e-07
ENSG00000126247.11	chr19	+	3	23.2193	3.67252e-08	9.98407e-07
ENSG00000144579.8	chr2	+	2	45.1688	3.69588e-08	9.98407e-07
ENSG00000077522.14	chr1	+	3	23.1554	3.80622e-08	1.01393e-06
ENSG00000111716.14	chr12	-	3	22.8966	4.45188e-08	1.16969e-06
ENSG00000102606.18	chr13	+	4	15.6714	5.0273e-08	1.30302e-06
ENSG00000185650.10	chr14	-	2	43.4427	5.67101e-08	1.45027e-06
ENSG00000129991.13	chr19	-	2	43.0923	6.38586e-08	1.61159e-06
ENSG00000173812.11	chr17	+	2	42.7155	6.8104e-08	1.69641e-06
ENSG00000085733.16	chr11	+	2	42.6583	6.90957e-08	1.69905e-06
ENSG00000142192.21	chr21	-	2	42.3789	7.41678e-08	1.80068e-06
ENSG00000104529.17	chr8	-	2	42.2543	7.65533e-08	1.83537e-06
ENSG00000198626.17	chr1	+	3	21.8203	8.11479e-08	1.9215e-06
ENSG00000185201.17	chr11	+	2	41.1939	1.00432e-07	2.3345e-06
ENSG00000078304.19	chr14	+	3	21.4352	1.01323e-07	2.3345e-06
ENSG00000184840.12	chr5	+	2	41.1246	1.02241e-07	2.3345e-06
ENSG00000142173.16	chr21	+	4	14.8409	1.07628e-07	2.4286e-06
ENSG00000164692.18	chr7	+	5	11.4218	1.39293e-07	3.10656e-06
ENSG00000134775.15	chr18	+	2	39.6565	1.49835e-07	3.30326e-06
ENSG00000160216.21	chr21	+	3	20.7198	1.60884e-07	3.50654e-06
ENSG00000170345.10	chr14	+	2	39.4679	1.69275e-07	3.64796e-06
ENSG00000156256.15	chr21	+	2	40.2973	1.75165e-07	3.73295e-06
ENSG00000103495.14	chr16	+	2	38.9726	1.79478e-07	3.78284e-06
ENSG00000125818.18	chr20	+	2	38.6115	1.97552e-07	4.11587e-06
ENSG00000136942.15	chr9	-	3	20.2772	1.99571e-07	4.11587e-06
ENSG00000166402.9	chr11	+	2	38.1108	2.25831e-07	4.6079e-06
ENSG00000173918.15	chr17	+	5	10.9741	2.48513e-07	5.01734e-06
ENSG00000282221.1	chr1	+	2	37.6467	2.55853e-07	5.11173e-06
ENSG00000126267.11	chr19	+	2	37.3911	2.74144e-07	5.4207e-06
ENSG00000198276.16	chr20	-	2	37.2466	2.85086e-07	5.57954e-06
ENSG00000072062.15	chr19	-	2	36.7246	3.28595e-07	6.36612e-06
ENSG00000105401.9	chr19	-	2	36.2747	3.71688e-07	7.12898e-06
ENSG00000112419.14	chr6	+	2	35.8299	4.20149e-07	7.97868e-06
ENSG00000228474.6	chr2	-	2	35.6446	4.4225e-07	8.31603e-06
ENSG00000221983.8	chr19	+	2	35.3287	4.82798e-07	8.99035e-06
ENSG00000196141.14	chr2	+	2	35.1152	5.12381e-07	9.37679e-06
ENSG00000093072.18	chr22	-	2	35.1086	5.13328e-07	9.37679e-06
ENSG00000088808.18	chr14	-	2	34.98	5.32101e-07	9.60801e-06
ENSG00000113648.16	chr5	-	2	34.9515	5.36365e-07	9.60801e-06
ENSG00000008441.18	chr19	+	2	34.9206	5.41014e-07	9.60801e-06
ENSG00000087086.15	chr19	+	2	34.8339	5.54317e-07	9.75394e-06
ENSG00000163565.19	chr1	+	4	13.0752	5.71203e-07	9.95971e-06
ENSG00000165629.20	chr10	+	3	18.461	5.96972e-07	1.02751e-05
ENSG00000071575.11	chr2	+	2	34.5517	6.00008e-07	1.02751e-05
ENSG00000140545.15	chr15	-	2	34.485	6.11365e-07	1.0377e-05
ENSG00000080824.19	chr14	-	4	12.9937	6.1798e-07	1.03972e-05
ENSG00000149925.22	chr16	+	4	12.9546	6.41795e-07	1.0704e-05
ENSG00000122359.18	chr10	-	2	34.1506	6.71858e-07	1.11088e-05
ENSG00000072518.22	chr11	+	2	34.1177	6.78137e-07	1.11168e-05
ENSG00000111640.15	chr12	+	3	18.1562	7.20388e-07	1.17094e-05
ENSG00000156298.13	chrX	+	2	33.8016	7.41724e-07	1.19549e-05
ENSG00000071082.11	chr2	+	2	33.6214	7.9839e-07	1.27609e-05
ENSG00000162512.16	chr1	-	2	33.4956	8.09254e-07	1.28277e-05
ENSG00000187498.16	chr13	-	2	33.3253	8.49603e-07	1.33569e-05
ENSG00000170558.10	chr18	-	2	33.6364	8.70195e-07	1.35474e-05
ENSG00000225663.8	chr17	-	2	33.2191	8.75847e-07	1.35474e-05
ENSG00000169756.16	chr2	+	3	17.7475	9.28617e-07	1.42487e-05
ENSG00000182196.13	chr12	+	2	32.9492	9.46395e-07	1.44062e-05
ENSG00000134321.13	chr2	+	2	34.1701	9.83918e-07	1.4748e-05
ENSG00000114923.17	chr2	+	4	12.5154	9.84224e-07	1.4748e-05
ENSG00000134419.15	chr16	-	2	32.5234	1.0932e-06	1.62539e-05
ENSG00000183072.10	chr5	-	2	32.2609	1.15465e-06	1.70355e-05
ENSG00000136521.13	chr3	+	2	32.1784	1.18269e-06	1.7316e-05
ENSG00000115414.21	chr2	-	5	9.75046	1.29552e-06	1.88243e-05
ENSG00000116128.11	chr1	+	2	31.7257	1.34962e-06	1.9463e-05
ENSG00000157654.19	chr9	+	7	7.13939	1.42403e-06	2.03827e-05
ENSG00000178104.19	chr1	+	3	17.1955	1.52556e-06	2.15573e-05
ENSG00000143321.19	chr1	-	3	16.9449	1.53889e-06	2.15573e-05
ENSG00000132463.14	chr4	-	2	31.2767	1.5398e-06	2.15573e-05
ENSG00000066136.20	chr1	+	2	31.1311	1.60737e-06	2.23402e-05
ENSG00000157216.16	chr1	-	2	31.0914	1.62632e-06	2.24408e-05
ENSG00000167701.14	chr8	+	2	31.0357	1.65331e-06	2.26504e-05
ENSG00000087274.17	chr4	+	3	16.8	1.68738e-06	2.29532e-05
ENSG00000184007.22	chr1	-	3	16.6829	1.81807e-06	2.44921e-05
ENSG00000014641.21	chr2	+	2	30.7003	1.82605e-06	2.44921e-05
ENSG00000095787.24	chr10	+	2	30.6616	1.84718e-06	2.46034e-05
ENSG00000120333.4	chr1	-	2	30.5397	1.91542e-06	2.53364e-05
ENSG00000184347.15	chr5	-	2	30.3578	2.02215e-06	2.65044e-05
ENSG00000110700.7	chr11	-	2	30.3426	2.03136e-06	2.65044e-05
ENSG00000177565.18	chr3	-	2	30.3167	2.0471e-06	2.65293e-05
ENSG00000149932.17	chr16	+	2	30.2047	2.11685e-06	2.72491e-05
ENSG00000179583.20	chr16	+	4	11.6605	2.29252e-06	2.93137e-05
ENSG00000167792.13	chr11	+	3	16.3063	2.31447e-06	2.93984e-05
ENSG00000111678.11	chr12	+	2	29.5224	2.59902e-06	3.27776e-05
ENSG00000083845.9	chr19	+	2	29.5025	2.61469e-06	3.27776e-05
ENSG00000170485.17	chr2	+	2	29.4481	2.65803e-06	3.31046e-05
ENSG00000079215.15	chr5	+	3	16.0657	2.70323e-06	3.34503e-05
ENSG00000162599.17	chr1	+	2	29.276	2.80037e-06	3.44302e-05
ENSG00000198832.10	chr22	-	2	29.0462	3.00287e-06	3.66252e-05
ENSG00000141971.13	chr19	+	2	29.0307	3.01709e-06	3.66252e-05
ENSG00000070404.10	chr19	+	2	29.0903	3.25106e-06	3.92172e-05
ENSG00000107816.17	chr10	+	2	28.4735	3.57758e-06	4.28862e-05
ENSG00000182149.21	chr16	+	2	28.4485	3.60515e-06	4.29483e-05
ENSG00000196562.14	chr20	-	2	28.2812	3.79556e-06	4.49375e-05
ENSG00000180879.14	chrX	+	2	28.2003	3.89137e-06	4.57892e-05
ENSG00000258289.9	chr14	+	2	28.0911	4.02476e-06	4.70592e-05
ENSG00000136699.20	chr2	-	2	28.0722	4.04837e-06	4.70592e-05
ENSG00000140105.18	chr14	-	2	28.048	4.07879e-06	4.71273e-05
ENSG00000107317.13	chr9	+	3	15.4652	4.23742e-06	4.86669e-05
ENSG00000174891.13	chr3	+	2	27.8039	4.39897e-06	5.02215e-05
ENSG00000118046.16	chr19	+	2	27.7661	4.49524e-06	5.1017e-05
ENSG00000164587.13	chr5	-	3	15.2649	4.58816e-06	5.16022e-05
ENSG00000050165.18	chr11	-	3	15.2608	4.60061e-06	5.16022e-05
ENSG00000154678.18	chr7	-	2	27.4761	4.87123e-06	5.43199e-05
ENSG00000142871.18	chr1	+	2	27.7454	5.13405e-06	5.69196e-05
ENSG00000136436.15	chr17	+	3	15.0295	5.32621e-06	5.87107e-05
ENSG00000179833.4	chr2	-	2	27.0742	5.52385e-06	6.05413e-05
ENSG00000167994.13	chr11	-	2	26.955	5.73449e-06	6.24929e-05
ENSG00000163660.12	chr3	-	2	26.8744	5.88183e-06	6.36767e-05
ENSG00000105193.9	chr19	-	2	26.912	5.90952e-06	6.36767e-05
ENSG00000149273.15	chr11	+	2	26.6877	6.23849e-06	6.6846e-05
ENSG00000240583.14	chr7	+	3	14.6954	6.65e-06	7.08594e-05
ENSG00000088992.18	chr12	-	2	26.5932	6.80587e-06	7.21196e-05
ENSG00000167815.12	chr19	-	2	26.3938	6.84653e-06	7.21518e-05
ENSG00000125844.16	chr20	-	2	26.3394	6.96574e-06	7.3007e-05
ENSG00000122406.14	chr1	+	2	26.2936	7.06759e-06	7.3672e-05
ENSG00000101210.13	chr20	-	3	14.5581	7.28889e-06	7.5568e-05
ENSG00000138326.21	chr10	+	2	26.1533	7.50853e-06	7.74266e-05
ENSG00000140403.12	chr15	+	2	26.1014	8.16441e-06	8.37397e-05
ENSG00000184752.13	chr12	-	2	25.7987	8.27604e-06	8.44332e-05
ENSG00000182899.17	chr3	+	2	25.7796	8.32679e-06	8.45015e-05
ENSG00000143013.13	chr1	+	2	25.7509	8.4038e-06	8.48342e-05
ENSG00000116685.16	chr1	-	2	25.702	8.53661e-06	8.57236e-05
ENSG00000137801.11	chr15	+	2	25.5742	8.89422e-06	8.88496e-05
ENSG00000104964.15	chr19	-	2	25.5	9.10879e-06	9.05216e-05
ENSG00000198755.11	chr6	+	2	25.4337	9.30539e-06	9.19986e-05
ENSG00000138193.16	chr10	+	2	25.2176	9.97734e-06	9.8136e-05
ENSG00000067182.8	chr12	-	2	25.1154	1.03126e-05	0.000100916
ENSG00000128595.17	chr7	+	2	25.0261	1.06153e-05	0.000103351
ENSG00000178882.15	chr12	+	2	24.9636	1.08328e-05	0.000104936
ENSG00000205560.13	chr22	-	2	24.9605	1.09369e-05	0.000104947
ENSG00000172037.14	chr3	-	2	24.9323	1.09433e-05	0.000104947
ENSG00000135486.19	chr12	+	2	24.8821	1.11233e-05	0.000106142
ENSG00000115998.8	chr2	-	2	24.8165	1.13633e-05	0.000107895
ENSG00000112137.18	chr6	+	3	13.8901	1.14362e-05	0.000108052
ENSG00000132507.18	chr17	+	2	24.7204	1.17244e-05	0.000110232
ENSG00000183255.12	chr21	-	2	24.4363	1.28641e-05	0.000120358
ENSG00000132329.11	chr2	+	2	24.218	1.38189e-05	0.000128663
ENSG00000142541.18	chr19	+	2	24.1265	1.4241e-05	0.000131953
ENSG00000155657.28	chr2	-	6	6.80942	1.44013e-05	0.000132797
ENSG00000141736.14	chr17	+	2	23.8226	1.57424e-05	0.000144468
ENSG00000267577.1	chr19	+	2	24.0349	1.63439e-05	0.000148721
ENSG00000058056.10	chr3	+	3	13.3663	1.63609e-05	0.000148721
ENSG00000130176.8	chr19	+	3	13.4989	1.65704e-05	0.000149915
ENSG00000108654.16	chr17	-	4	9.7222	1.66939e-05	0.000150323
ENSG00000162241.12	chr11	-	2	23.6034	1.6928e-05	0.00015172
ENSG00000145592.14	chr5	-	2	23.7616	1.85908e-05	0.000165848
ENSG00000198467.16	chr9	-	4	9.6151	1.86829e-05	0.000165897
ENSG00000051620.11	chr6	+	2	23.2396	1.91075e-05	0.000168886
ENSG00000065320.9	chr17	+	2	23.208	1.93108e-05	0.0001699
ENSG00000120896.13	chr8	+	3	13.0747	2.00081e-05	0.000175231
ENSG00000133818.14	chr11	-	2	23.0416	2.04158e-05	0.000177989
ENSG00000076555.15	chr12	+	4	9.51316	2.08014e-05	0.00018053
ENSG00000159403.18	chr12	-	2	22.9069	2.13594e-05	0.00018444
ENSG00000150938.10	chr2	+	2	23.116	2.14443e-05	0.00018444
ENSG00000125520.14	chr20	+	3	12.9458	2.18789e-05	0.000187101
ENSG00000115594.12	chr2	+	3	12.9412	2.19488e-05	0.000187101
ENSG00000203879.12	chrX	+	3	12.931	2.21044e-05	0.000187594
ENSG00000132475.10	chr17	-	3	12.899	2.2602e-05	0.000190958
ENSG00000101335.10	chr20	+	3	12.8998	2.27e-05	0.000190958
ENSG00000099622.14	chr19	+	3	12.8335	2.36564e-05	0.000198135
ENSG00000080854.16	chr11	-	2	22.0383	2.86563e-05	0.000238969
ENSG00000166228.9	chr10	-	2	21.8724	3.03257e-05	0.000251796
ENSG00000166326.7	chr11	+	2	21.7807	3.12922e-05	0.000257484
ENSG00000137767.14	chr15	+	2	21.7777	3.13244e-05	0.000257484
ENSG00000142507.10	chr17	+	2	21.7694	3.14136e-05	0.000257484
ENSG00000169946.14	chr8	+	2	21.6773	3.24207e-05	0.000264609
ENSG00000165119.21	chr9	-	2	21.6388	3.28526e-05	0.000266997
ENSG00000147684.10	chr8	+	2	21.6803	3.34428e-05	0.000270646
ENSG00000084234.18	chr11	+	3	12.3042	3.4281e-05	0.000276264
ENSG00000129521.15	chr14	-	2	21.4814	3.46784e-05	0.000278298
ENSG00000120071.15	chr17	-	2	21.5718	3.57324e-05	0.000285561
ENSG00000127946.17	chr7	-	2	21.2371	3.77274e-05	0.000300254
ENSG00000196628.20	chr18	-	6	6.25542	3.82553e-05	0.000303197
ENSG00000163697.17	chr4	-	3	12.1327	3.86992e-05	0.000305453
ENSG00000198563.14	chr6	-	2	21.1032	3.99434e-05	0.000313982
ENSG00000143799.14	chr1	-	2	21.058	4.01399e-05	0.000314238
ENSG00000179820.16	chr19	+	2	20.7332	4.494e-05	0.000349932
ENSG00000167522.16	chr16	-	2	20.7253	4.50643e-05	0.000349932
ENSG00000158864.13	chr1	+	2	20.6327	4.65447e-05	0.000359971
ENSG00000149591.17	chr11	+	2	21.0058	4.67535e-05	0.000360133
ENSG00000105379.10	chr19	-	2	20.7109	4.80807e-05	0.000368875
ENSG00000101333.18	chr20	+	2	20.4704	4.92643e-05	0.00037645
ENSG00000122786.20	chr7	+	4	8.66688	5.1299e-05	0.000390442
ENSG00000105993.15	chr7	+	2	20.1912	5.43405e-05	0.000411957
ENSG00000069399.15	chr19	+	2	20.1729	5.46912e-05	0.000412983
ENSG00000134871.19	chr13	+	2	20.1351	5.54253e-05	0.000416885
ENSG00000073536.18	chr17	-	2	20.7088	5.74e-05	0.000430051
ENSG00000151914.21	chr6	-	6	6.01229	5.89494e-05	0.000439941
ENSG00000061938.20	chr3	-	2	19.9243	5.97083e-05	0.000443878
ENSG00000187514.17	chr2	+	2	19.903	6.01612e-05	0.000445518
ENSG00000106263.18	chr7	+	2	19.8183	6.23743e-05	0.00046013
ENSG00000119335.17	chr9	+	2	19.7326	6.39087e-05	0.000469643
ENSG00000196419.13	chr22	+	2	19.699	6.46754e-05	0.000473464
ENSG00000100106.22	chr22	+	2	19.679	6.5136e-05	0.000475022
ENSG00000183955.13	chr12	+	2	19.5411	6.84133e-05	0.000497033
ENSG00000106631.8	chr7	-	2	19.9171	6.88591e-05	0.000498384
ENSG00000135387.21	chr11	+	2	19.5091	6.91988e-05	0.000498959
ENSG00000074181.9	chr19	-	2	19.4242	7.13269e-05	0.000510631
ENSG00000237125.11	chr4	+	3	11.2772	7.13792e-05	0.000510631
ENSG00000113916.18	chr3	-	2	19.4128	7.16161e-05	0.000510631
ENSG00000109099.16	chr17	-	4	8.2934	7.68825e-05	0.00054615
ENSG00000092841.19	chr12	+	2	19.1122	7.97569e-05	0.000564479
ENSG00000069275.13	chr1	-	2	19.0314	8.21095e-05	0.000578992
ENSG00000126709.16	chr1	-	2	19.3052	8.38201e-05	0.00058889
ENSG00000127603.30	chr1	+	8	4.70874	8.78998e-05	0.000615299
ENSG00000063177.13	chr19	-	2	18.8128	8.88407e-05	0.000619624
ENSG00000065978.19	chr1	+	2	18.7416	9.11546e-05	0.000633458
ENSG00000204267.16	chr6	-	2	18.7077	9.22794e-05	0.00063896
ENSG00000124942.14	chr11	-	3	10.8134	0.000100006	0.00068997
ENSG00000169641.13	chr1	-	2	18.4715	0.000100533	0.000690334
ENSG00000159176.14	chr1	-	2	18.4648	0.000100779	0.000690334
ENSG00000100364.19	chr22	-	2	18.4547	0.000101149	0.000690405
ENSG00000196924.19	chrX	-	3	10.805	0.000102328	0.000695975
ENSG00000153113.24	chr5	+	5	6.5921	0.000102933	0.000697619
ENSG00000115685.15	chr2	+	2	18.3802	0.00010393	0.000701893
ENSG00000132478.10	chr17	+	2	18.3016	0.000106949	0.00071975
ENSG00000101557.15	chr18	+	2	18.2545	0.000108803	0.000728873
ENSG00000111341.10	chr12	-	2	18.2479	0.000109065	0.000728873
ENSG00000112096.19	chr6	-	3	10.6839	0.00010996	0.000732306
ENSG00000254772.10	chr11	-	2	18.0936	0.000115394	0.000765834
ENSG00000196712.18	chr17	+	2	17.9657	0.000120934	0.000799833
ENSG00000126226.22	chr13	-	2	17.8875	0.000124458	0.000820314
ENSG00000160972.9	chr8	+	2	17.8629	0.000125586	0.000824913
ENSG00000008294.21	chr17	-	2	17.8198	0.000127597	0.000833355
ENSG00000106333.13	chr7	+	3	10.4802	0.000127741	0.000833355
ENSG00000099204.20	chr10	-	5	6.43567	0.000128934	0.000838289
ENSG00000186184.19	chr13	+	2	17.7205	0.000132347	0.000857576
ENSG00000143947.15	chr2	+	2	17.6332	0.000136684	0.000882692
ENSG00000087266.17	chr4	+	2	17.5685	0.000139992	0.00090102
ENSG00000116584.20	chr1	-	2	17.5023	0.00014346	0.000920255
ENSG00000173641.18	chr1	-	2	17.6042	0.00014524	0.00092857
ENSG00000130600.19	chr11	-	3	10.3045	0.000146306	0.000932278
ENSG00000198728.11	chr10	-	2	17.3819	0.000150009	0.000952703
ENSG00000101019.22	chr20	-	2	17.3487	0.000151868	0.00096133
ENSG00000184489.13	chr8	+	4	7.66792	0.000152713	0.0009635
ENSG00000108107.15	chr19	+	2	17.3638	0.000154552	0.000971906
ENSG00000104325.7	chr8	+	2	17.2872	0.000155384	0.000973091
ENSG00000008056.14	chrX	-	2	17.2807	0.000155755	0.000973091
ENSG00000141867.19	chr19	-	2	17.2622	0.000156836	0.000975188
ENSG00000133678.14	chr10	+	2	17.2575	0.000157108	0.000975188
ENSG00000107104.20	chr9	+	2	17.2003	0.000160491	0.000992976
ENSG00000186716.21	chr22	+	2	17.1846	0.000161432	0.000993066
ENSG00000159251.8	chr15	-	4	7.62062	0.000161541	0.000993066
ENSG00000148411.8	chr9	-	2	17.1278	0.000164887	0.00100423
ENSG00000196136.18	chr14	+	2	17.3252	0.000164908	0.00100423
ENSG00000184220.12	chr3	+	2	17.1271	0.000164929	0.00100423
ENSG00000051523.11	chr16	-	2	17.0971	0.000166783	0.00101231
ENSG00000108946.15	chr17	+	4	7.54135	0.000175698	0.00106099
ENSG00000153094.24	chr2	+	2	16.9546	0.00017591	0.00106099
ENSG00000099968.18	chr22	+	3	10.0111	0.000180909	0.00108772
ENSG00000142875.19	chr1	+	2	16.805	0.000186055	0.00111517
ENSG00000137449.17	chr4	+	2	16.7657	0.000188819	0.00112821
ENSG00000109171.15	chr4	+	2	16.7568	0.000189455	0.00112849
ENSG00000127838.14	chr2	+	3	9.94336	0.000190297	0.00113
ENSG00000173272.16	chr2	-	2	16.7523	0.000191355	0.00113278
ENSG00000058668.15	chr1	+	2	16.7186	0.000192191	0.00113294
ENSG00000134243.12	chr1	-	3	9.92752	0.000192564	0.00113294
ENSG00000104904.12	chr19	+	2	16.6459	0.000197522	0.00115855
ENSG00000123349.15	chr12	+	2	16.88	0.000199412	0.00116607
ENSG00000174282.12	chr17	-	2	16.6008	0.000200907	0.00117125
ENSG00000170348.9	chr14	-	2	16.5858	0.000202049	0.00117433
ENSG00000141759.15	chr18	-	2	16.48	0.000210274	0.00121845
ENSG00000177354.12	chr10	+	2	16.3518	0.000220721	0.00127513
ENSG00000102024.18	chrX	+	2	16.1762	0.000235929	0.0013589
ENSG00000111846.19	chr6	+	3	9.63221	0.000240353	0.00138023
ENSG00000178951.9	chr19	-	2	16.1091	0.000242028	0.00138268
ENSG00000135424.18	chr12	-	2	16.1277	0.000242222	0.00138268
ENSG00000173372.17	chr1	+	2	16.2465	0.000244661	0.00139246
ENSG00000137075.18	chr9	-	3	9.56382	0.000253077	0.0014361
ENSG00000086015.22	chr1	+	2	15.9714	0.000255077	0.00144318
ENSG00000134905.17	chr13	-	2	15.9505	0.000257119	0.00145045
ENSG00000244687.12	chr20	-	2	15.8006	0.000272286	0.00153083
ENSG00000185624.16	chr17	-	3	9.46373	0.000272964	0.00153083
ENSG00000107669.18	chr10	-	2	15.7373	0.000278971	0.00155768
ENSG00000113140.11	chr5	-	2	15.7335	0.000279376	0.00155768
ENSG00000171877.21	chr15	-	2	15.7167	0.000281187	0.00156324
ENSG00000105568.18	chr19	+	2	15.6952	0.000283512	0.00156984
ENSG00000154262.13	chr17	-	2	15.6907	0.000284011	0.00156984
ENSG00000155366.17	chr1	-	2	15.6002	0.000294055	0.00162068
ENSG00000039523.20	chr16	+	2	15.5204	0.000303233	0.00166648
ENSG00000136925.15	chr9	-	2	15.4368	0.000313159	0.00171611
ENSG00000104805.16	chr19	+	3	9.26399	0.000317631	0.00173566
ENSG00000136950.13	chr9	+	2	15.3632	0.000322194	0.00175559
ENSG00000169045.17	chr5	-	2	15.2998	0.00033018	0.00179401
ENSG00000167460.17	chr19	+	3	9.20623	0.000336034	0.00182066
ENSG00000173221.14	chr5	-	2	15.2055	0.000342471	0.00184819
ENSG00000130175.10	chr19	+	2	15.1949	0.000343881	0.00184819
ENSG00000151135.10	chr12	+	2	15.194	0.000344006	0.00184819
ENSG00000125730.17	chr19	-	2	15.1741	0.000346659	0.00185724
ENSG00000127824.14	chr2	-	2	15.0853	0.000358835	0.00191599
ENSG00000143774.17	chr1	+	3	9.1011	0.000359623	0.00191599
ENSG00000165995.22	chr10	+	3	9.09496	0.000361312	0.00191966
ENSG00000146701.12	chr7	+	2	14.9749	0.000374575	0.00198463
ENSG00000196526.10	chr4	-	2	14.9508	0.000378108	0.00199783
ENSG00000164091.12	chr3	-	2	14.9373	0.000380114	0.00200291
ENSG00000164597.15	chr7	-	3	9.01585	0.000383849	0.00201705
ENSG00000179950.14	chr8	-	2	14.8733	0.000389722	0.00204111
ENSG00000178982.10	chr19	+	2	14.8678	0.000390556	0.00204111
ENSG00000105483.18	chr19	-	2	14.8059	0.000400126	0.00208544
ENSG00000093167.18	chr3	-	2	14.7339	0.000411547	0.00213915
ENSG00000157514.16	chrX	-	2	14.717	0.000414278	0.00214753
ENSG00000198842.10	chr1	+	3	8.89448	0.000421288	0.00217798
ENSG00000275832.5	chr17	+	3	8.88388	0.00042473	0.00218987
ENSG00000068308.14	chrX	-	2	14.5484	0.000442624	0.00227601
ENSG00000171444.18	chr5	-	3	8.82127	0.000445678	0.00228559
ENSG00000138085.17	chr2	+	2	14.4975	0.000451571	0.00230963
ENSG00000196313.11	chr7	+	2	14.486	0.000453618	0.00231393
ENSG00000143226.15	chr1	+	2	14.4853	0.000456775	0.00231992
ENSG00000118194.20	chr1	-	7	4.40115	0.00045721	0.00231992
ENSG00000113742.14	chr5	+	4	6.68492	0.000459142	0.00232357
ENSG00000087074.8	chr19	+	2	14.3746	0.000473971	0.00239047
ENSG00000060237.19	chr12	+	2	14.3699	0.000474854	0.00239047
ENSG00000182473.22	chr17	-	2	14.3273	0.000482908	0.00242465
ENSG00000010256.11	chr3	-	2	14.3172	0.000484848	0.00242804
ENSG00000119912.18	chr10	-	2	14.304	0.000487381	0.00243437
ENSG00000084090.14	chr2	-	2	14.2669	0.000494582	0.00246392
ENSG00000108823.16	chr17	+	2	14.1818	0.000511513	0.00254166
ENSG00000113448.19	chr5	-	2	14.1313	0.000521855	0.00258635
ENSG00000157540.22	chr21	+	2	14.05	0.000538973	0.0026643
ENSG00000075711.21	chr3	-	2	14.1175	0.000542026	0.00267251
ENSG00000101605.13	chr18	-	2	13.9742	0.000555484	0.00273184
ENSG00000166913.13	chr20	+	2	13.8881	0.00057487	0.00281995
ENSG00000120616.16	chr10	-	2	13.8299	0.000588359	0.00287876
ENSG00000100234.12	chr22	+	2	13.8045	0.000594374	0.00290079
ENSG00000185437.14	chr21	+	3	8.42753	0.000606899	0.0029544
ENSG00000115461.5	chr2	-	2	13.6728	0.000626503	0.00304211
ENSG00000084674.15	chr2	-	2	13.717	0.000636869	0.00308463
ENSG00000109016.17	chr17	+	2	13.6061	0.000643501	0.00310891
ENSG00000107897.20	chr10	-	2	13.5757	0.000651403	0.00313918
ENSG00000106608.17	chr7	-	2	13.5593	0.000655683	0.00315188
ENSG00000119383.21	chr9	+	3	8.30892	0.000662817	0.00317821
ENSG00000154358.23	chr1	+	3	8.29741	0.000668796	0.00319888
ENSG00000161013.17	chr5	-	2	13.4079	0.000696874	0.00331484
ENSG00000119950.21	chr10	+	3	8.2426	0.000698033	0.00331484
ENSG00000198796.7	chr18	-	2	13.4031	0.000698225	0.00331484
ENSG00000178980.15	chr19	+	2	13.2788	0.000734125	0.00347667
ENSG00000148180.21	chr9	+	6	4.60946	0.000741749	0.00349655
ENSG00000150991.15	chr12	-	2	13.2469	0.000743658	0.00349655
ENSG00000226742.4	chr18	+	2	13.2465	0.000743791	0.00349655
ENSG00000131981.16	chr14	+	3	8.14897	0.000751077	0.00351618
ENSG00000153250.20	chr2	-	3	8.14669	0.000752424	0.00351618
ENSG00000159069.14	chr9	-	2	13.2145	0.000753468	0.00351618
ENSG00000135218.19	chr7	+	7	4.15604	0.000757985	0.00352868
ENSG00000008256.16	chr7	-	2	13.1694	0.000767378	0.00355853
ENSG00000040341.18	chr8	-	2	13.167	0.000768109	0.00355853
ENSG00000132669.14	chr20	+	4	6.20087	0.000797453	0.00368558
ENSG00000079805.18	chr19	+	2	13.0588	0.000802581	0.00370036
ENSG00000150093.20	chr10	-	2	13.0327	0.00081111	0.00373072
ENSG00000082641.16	chr17	+	3	7.99085	0.000850326	0.00390174
ENSG00000100664.11	chr14	+	2	12.9055	0.000854231	0.0039103
ENSG00000133835.17	chr5	+	2	12.8559	0.000871671	0.00398063
ENSG00000186439.14	chr6	-	2	12.8274	0.000881875	0.00401766
ENSG00000170634.13	chr2	+	3	7.90219	0.000911815	0.00414422
ENSG00000109390.13	chr4	-	3	7.89351	0.000918074	0.0041628
ENSG00000185088.14	chr15	-	2	12.6676	0.000941431	0.0042514
ENSG00000080503.24	chr9	+	4	6.05589	0.000942047	0.0042514
ENSG00000055118.16	chr7	-	2	12.7567	0.00094662	0.00426201
ENSG00000018625.15	chr1	+	2	12.5317	0.000998467	0.00447709
ENSG00000160691.19	chr1	-	2	12.5203	0.00100009	0.00447709
ENSG00000066697.15	chr9	+	2	12.5171	0.00100139	0.00447709
ENSG00000104763.20	chr8	-	7	4.02138	0.00101153	0.00451189
ENSG00000197063.11	chr17	-	2	12.4663	0.00102257	0.00455054
ENSG00000079819.19	chr6	-	2	12.433	0.00103667	0.00460261
ENSG00000053747.17	chr18	+	3	7.72023	0.00105284	0.00465787
ENSG00000152894.15	chr6	-	2	12.3928	0.00105397	0.00465787
ENSG00000107771.17	chr10	+	2	12.3763	0.00106117	0.00467892
ENSG00000136160.17	chr13	-	2	12.2997	0.00109528	0.00481824
ENSG00000053254.16	chr14	-	3	7.64318	0.00111919	0.00491213
ENSG00000151150.22	chr10	-	4	5.89593	0.00113294	0.00496114
ENSG00000171681.12	chr12	+	2	12.1926	0.00114491	0.00500212
ENSG00000250159.7	chr5	-	2	12.1235	0.00117816	0.00513107
ENSG00000141447.18	chr18	-	2	12.1202	0.00117977	0.00513107
ENSG00000163681.16	chr3	+	4	5.84209	0.00120573	0.00523211
ENSG00000082397.18	chr18	-	2	11.9482	0.00126722	0.00548651
ENSG00000141905.19	chr19	+	7	3.90616	0.0012948	0.00559329
ENSG00000213465.8	chr11	+	2	11.8485	0.00132107	0.00569394
ENSG00000167244.21	chr11	-	4	5.76072	0.00132491	0.00569771
ENSG00000184601.11	chr14	+	2	11.8409	0.00132899	0.00570246
ENSG00000142676.14	chr1	+	2	11.8346	0.00134924	0.00577643
ENSG00000107738.20	chr10	-	2	11.8787	0.00136713	0.00583997
ENSG00000119699.8	chr14	-	2	11.7203	0.00139381	0.00594072
ENSG00000171033.13	chr8	+	2	11.6447	0.00143868	0.00611839
ENSG00000152242.11	chr18	+	2	11.6037	0.00146368	0.00621094
ENSG00000130054.5	chrX	+	2	11.5844	0.00147561	0.00624771
ENSG00000135241.17	chr7	-	2	11.5489	0.00149778	0.00632764
ENSG00000088986.11	chr12	+	2	11.5237	0.00151374	0.006381
ENSG00000160111.14	chr19	-	2	11.4823	0.00154034	0.0064789
ENSG00000147403.18	chrX	+	2	11.4584	0.00155594	0.00652926
ENSG00000101294.18	chr20	+	2	11.4536	0.00155912	0.00652926
ENSG00000182963.11	chr17	-	2	11.4096	0.00158832	0.00663705
ENSG00000160877.6	chr19	+	2	11.3917	0.00160033	0.00667269
ENSG00000128567.17	chr7	-	2	11.367	0.00161712	0.00672208
ENSG00000163605.15	chr3	+	3	7.17952	0.00162098	0.00672208
ENSG00000143995.20	chr2	+	2	11.3589	0.00162269	0.00672208
ENSG00000152082.15	chr2	+	2	11.3915	0.00163665	0.00675386
ENSG00000144935.15	chr3	+	2	11.3375	0.00163741	0.00675386
ENSG00000133142.18	chrX	+	2	11.3274	0.00164446	0.00676839
ENSG00000158158.12	chr2	+	2	11.1911	0.00174216	0.00715516
ENSG00000150764.14	chr11	+	3	7.08154	0.00175401	0.00717412
ENSG00000072609.18	chr12	-	2	11.1748	0.00175426	0.00717412
ENSG00000231607.13	chr13	-	2	11.1321	0.00178632	0.00728969
ENSG00000187954.13	chr8	-	2	11.11	0.00180321	0.00732811
ENSG00000105202.9	chr19	-	2	11.1098	0.00180337	0.00732811
ENSG00000106052.13	chr7	+	2	11.0825	0.00182438	0.00738727
ENSG00000179604.10	chr17	-	2	11.0809	0.00182563	0.00738727
ENSG00000124225.16	chr20	-	2	11.053	0.00184747	0.0074599
ENSG00000010803.16	chr1	-	2	10.992	0.0018961	0.00762796
ENSG00000112624.12	chr6	+	2	10.9908	0.00189705	0.00762796
ENSG00000008513.16	chr8	-	2	10.9406	0.00193808	0.00777666
ENSG00000213160.10	chr2	+	2	10.9294	0.00194744	0.0077979
ENSG00000145362.20	chr4	+	5	4.59227	0.00198698	0.00793964
ENSG00000064225.12	chr3	+	2	10.866	0.00200086	0.0079785
ENSG00000065427.15	chr16	-	2	10.8161	0.00204405	0.0081338
ENSG00000126457.22	chr19	+	3	6.88302	0.00205932	0.00815927
ENSG00000102531.16	chr13	+	3	6.88095	0.00206278	0.00815927
ENSG00000095637.22	chr10	-	2	10.7943	0.00206321	0.00815927
ENSG00000172819.17	chr12	-	3	6.8744	0.00207376	0.00818409
ENSG00000228794.10	chr1	+	2	10.7466	0.00210591	0.00829392
ENSG00000187778.14	chr12	-	2	10.7395	0.0021123	0.00830205
ENSG00000105227.16	chr19	-	2	10.7302	0.00212074	0.00831817
ENSG00000116171.19	chr1	+	2	10.7199	0.0021301	0.00833083
ENSG00000160408.15	chr9	-	2	10.7171	0.00213266	0.00833083
ENSG00000248923.1	chr5	-	2	10.8033	0.00216366	0.00843474
ENSG00000166532.16	chr12	+	2	10.6524	0.00219277	0.00853089
ENSG00000196531.14	chr12	-	3	6.79811	0.00220623	0.00856588
ENSG00000166949.17	chr15	+	2	10.5541	0.0022876	0.00886388
ENSG00000119314.16	chr9	-	2	10.4985	0.00234315	0.00904822
ENSG00000184009.13	chr17	-	2	10.5035	0.00234754	0.00904822
ENSG00000015153.15	chr12	-	2	10.4924	0.00234933	0.00904822
ENSG00000142156.15	chr21	+	2	10.4765	0.00236549	0.00908887
ENSG00000160072.20	chr1	+	2	10.4727	0.00236936	0.00908887
ENSG00000143353.12	chr1	+	2	10.4446	0.00239828	0.00916588
ENSG00000080546.13	chr6	-	2	10.4439	0.00239899	0.00916588
ENSG00000102316.17	chrX	+	3	6.67997	0.00242884	0.00925241
ENSG00000101665.9	chr18	-	2	10.413	0.00243129	0.00925241
ENSG00000114391.13	chr3	-	2	10.4007	0.00244425	0.00927245
ENSG00000105607.13	chr19	+	2	10.3944	0.00245095	0.00927245
ENSG00000135926.15	chr2	-	4	5.23345	0.00245106	0.00927245
ENSG00000172493.22	chr4	+	3	6.64322	0.00250273	0.0094493
ENSG00000130822.16	chrX	-	2	10.2831	0.00257206	0.00969199
ENSG00000108924.14	chr17	+	3	6.60189	0.00258863	0.00973529
ENSG00000112773.16	chr6	-	2	10.2352	0.00262611	0.0098569
ENSG00000050820.17	chr16	-	3	6.57115	0.00265449	0.00994398
ENSG00000172765.17	chr3	-	2	10.1606	0.00272236	0.0101783
ENSG00000138606.19	chr15	-	2	10.1324	0.00274627	0.0102477
ENSG00000077009.13	chr19	+	3	6.55219	0.00278076	0.0103563
ENSG00000078808.19	chr1	-	2	10.0246	0.00287855	0.0106997
ENSG00000011451.21	chr19	-	3	6.42328	0.00299634	0.011116
ENSG00000149131.17	chr11	+	2	9.91647	0.00301795	0.0111746
ENSG00000125398.8	chr17	+	2	9.91197	0.00302391	0.0111751
ENSG00000178209.16	chr8	-	7	3.49865	0.00309711	0.0114236
ENSG00000197694.18	chr9	+	2	9.81042	0.00316169	0.0116394
ENSG00000149187.18	chr11	-	2	9.79154	0.00318804	0.0117139
ENSG00000064205.11	chr20	+	2	9.81911	0.00320819	0.0117654
ENSG00000136261.15	chr7	+	2	9.75194	0.00324404	0.0118742
ENSG00000163171.8	chr2	-	2	9.71721	0.00329403	0.0120263
ENSG00000038274.17	chr5	+	2	9.71438	0.00329814	0.0120263
ENSG00000151835.16	chr13	-	2	9.70167	0.00331665	0.0120709
ENSG00000173848.19	chr10	+	2	9.6695	0.00336403	0.0122201
ENSG00000145431.11	chr4	-	2	9.6345	0.00341639	0.0123868
ENSG00000075240.17	chr22	+	2	9.60074	0.0034677	0.0125436
ENSG00000122643.22	chr7	-	2	9.59747	0.00347271	0.0125436
ENSG00000113645.15	chr5	+	2	9.56632	0.00352087	0.0126937
ENSG00000059691.12	chr4	-	3	6.21797	0.00354812	0.0127679
ENSG00000022267.19	chrX	+	5	4.21383	0.00355959	0.0127852
ENSG00000172354.10	chr7	+	2	9.52201	0.00359058	0.0128724
ENSG00000077044.11	chr2	+	2	9.50892	0.00361145	0.012923
ENSG00000173402.12	chr3	+	2	9.47397	0.00366781	0.0131003
ENSG00000171425.10	chr19	+	2	9.45877	0.00369262	0.0131644
ENSG00000106823.12	chr9	-	2	9.45366	0.003701	0.0131698
ENSG00000062716.13	chr17	+	2	9.42458	0.00374908	0.0133162
ENSG00000004799.8	chr7	-	3	6.21022	0.00375626	0.013317
ENSG00000198053.12	chr20	+	2	9.40035	0.00378963	0.0134105
ENSG00000130158.14	chr19	-	2	9.33972	0.00389317	0.0137516
ENSG00000126456.16	chr19	-	2	9.2945	0.00397234	0.0140054
ENSG00000156011.17	chr8	-	3	6.06291	0.00403385	0.0141962
ENSG00000070778.13	chr14	-	2	9.1864	0.00416862	0.0146436
ENSG00000139117.14	chr12	-	2	9.14723	0.00424226	0.014875
ENSG00000116667.15	chr1	+	2	9.11238	0.00430892	0.0150812
ENSG00000097007.19	chr9	+	2	9.06252	0.00440628	0.0153939
ENSG00000115657.14	chr2	-	2	9.05222	0.00442667	0.015437
ENSG00000129084.18	chr11	-	2	9.02778	0.00447547	0.0155789
ENSG00000138185.20	chr10	+	2	9.00545	0.00452057	0.0157073
ENSG00000105426.17	chr19	-	4	4.70706	0.00456324	0.0158269
ENSG00000115194.11	chr2	-	2	8.97874	0.00457512	0.0158395
ENSG00000112541.18	chr6	-	4	4.7027	0.00458692	0.0158517
ENSG00000106025.9	chr7	-	2	8.95495	0.00462432	0.0159454
ENSG00000172239.14	chr5	-	2	8.95464	0.00463951	0.0159454
ENSG00000117419.16	chr1	-	2	8.94731	0.00464023	0.0159454
ENSG00000078596.11	chrX	-	2	8.94394	0.00464728	0.0159454
ENSG00000083857.14	chr4	-	2	8.93576	0.00466441	0.0159756
ENSG00000224861.1	chr14	-	2	8.93162	0.00467311	0.0159769
ENSG00000162496.9	chr1	-	2	8.91867	0.00470042	0.0160163
ENSG00000101161.8	chr20	+	2	8.91823	0.00470135	0.0160163
ENSG00000185567.7	chr14	-	2	8.89491	0.00475099	0.0161567
ENSG00000138347.16	chr10	+	2	8.85351	0.00484046	0.0164319
ENSG00000148700.15	chr10	+	3	5.83863	0.00486124	0.0164732
ENSG00000150636.17	chr18	+	2	8.82502	0.00490308	0.0165857
ENSG00000144802.11	chr3	+	2	8.65693	0.00529048	0.0178647
ENSG00000132530.17	chr17	+	2	8.68159	0.00531157	0.0178805
ENSG00000173281.5	chr8	-	2	8.64723	0.00531381	0.0178805
ENSG00000071127.17	chr4	-	3	5.70326	0.00544384	0.018286
ENSG00000131759.18	chr17	+	3	5.69779	0.00546885	0.0183379
ENSG00000175274.19	chr11	-	2	8.57252	0.00549716	0.0184006
ENSG00000137106.18	chr9	+	2	8.5398	0.00557959	0.018644
ENSG00000204256.14	chr6	+	3	5.65447	0.0056711	0.0189168
ENSG00000188938.17	chr9	-	3	5.64948	0.00569491	0.0189633
ENSG00000163635.20	chr3	+	2	8.4825	0.0057271	0.0190374
ENSG00000082438.18	chr2	-	2	8.44298	0.00583123	0.01935
ENSG00000143344.16	chr1	+	2	8.43447	0.00585392	0.0193917
ENSG00000109686.19	chr4	-	3	5.61245	0.00587473	0.0194271
ENSG00000173486.14	chr11	+	2	8.38556	0.00598616	0.0197615
ENSG00000086200.17	chr5	+	2	8.37467	0.00601604	0.0198153
ENSG00000204843.13	chr2	-	3	5.59046	0.0060231	0.0198153
ENSG00000143179.16	chr1	+	2	8.36512	0.00604236	0.0198446
ENSG00000136710.10	chr2	-	2	8.24509	0.00638393	0.0209306
ENSG00000075239.14	chr11	+	3	5.50642	0.00642273	0.0210218
ENSG00000240849.11	chr20	-	2	8.17314	0.00659848	0.0215603
ENSG00000037241.7	chr5	+	2	8.15096	0.00666614	0.0217443
ENSG00000138639.18	chr4	+	2	8.12483	0.00675726	0.0220041
ENSG00000107798.18	chr10	-	2	8.07387	0.00690717	0.0224542
ENSG00000125834.13	chr20	+	2	8.05673	0.00696204	0.0225942
ENSG00000136156.15	chr13	+	3	5.39543	0.00705336	0.0228519
ENSG00000115053.17	chr2	-	3	5.39333	0.00706585	0.0228538
ENSG00000134326.12	chr2	-	2	8.04611	0.00714554	0.0230726
ENSG00000121769.8	chr1	-	2	7.9902	0.00717933	0.0231428
ENSG00000137074.20	chr9	-	2	7.98295	0.00720342	0.0231815
ENSG00000073578.17	chr5	+	3	5.36279	0.00725068	0.0232945
ENSG00000153774.9	chr16	-	2	7.95726	0.00728957	0.0233802
ENSG00000184640.20	chr17	+	4	4.30688	0.00735337	0.0235455
ENSG00000017797.13	chr18	+	2	7.88857	0.00752531	0.0240559
ENSG00000265681.7	chr18	-	2	7.86541	0.00760661	0.0242753
ENSG00000213853.10	chr16	-	2	7.85142	0.00765619	0.024393
ENSG00000010282.15	chr3	-	2	7.82112	0.00778443	0.0247604
ENSG00000130811.12	chr19	-	2	7.79443	0.00786171	0.0249343
ENSG00000188257.12	chr1	-	2	7.91066	0.00786508	0.0249343
ENSG00000075391.17	chr1	+	2	7.74544	0.00804304	0.0254563
ENSG00000129657.16	chr17	+	3	5.23419	0.00808565	0.0255491
ENSG00000004478.8	chr12	+	2	7.72517	0.0081194	0.0255934
ENSG00000166313.19	chr11	-	2	7.72332	0.00812639	0.0255934
ENSG00000080189.15	chr20	-	2	7.70822	0.00818381	0.025732
ENSG00000198363.18	chr8	-	3	5.21634	0.00820914	0.0257694
ENSG00000167468.18	chr19	+	2	7.66304	0.00835821	0.0261945
ENSG00000153904.21	chr1	-	2	7.67655	0.00841351	0.0263248
ENSG00000213145.10	chr14	+	2	7.64182	0.00844152	0.0263694
ENSG00000130528.12	chr19	-	2	7.62926	0.0084912	0.0264536
ENSG00000177830.18	chr11	-	2	7.62804	0.00849605	0.0264536
ENSG00000100320.23	chr22	-	2	7.6124	0.00855841	0.0266046
ENSG00000175550.8	chr11	+	2	7.60146	0.00860233	0.0266614
ENSG00000087095.13	chr17	+	2	7.60092	0.0086045	0.0266614
ENSG00000072682.20	chr5	-	2	7.54318	0.00884039	0.0273482
ENSG00000142599.19	chr1	-	6	3.25339	0.00887988	0.0274261
ENSG00000148450.13	chr10	+	2	7.51956	0.00893887	0.0275639
ENSG00000075914.13	chr3	+	2	7.47624	0.00912254	0.0280851
ENSG00000266412.6	chr10	-	2	7.46034	0.00919094	0.0282504
ENSG00000048740.18	chr10	+	3	5.07396	0.00926689	0.0284382
ENSG00000214530.10	chr11	-	2	7.43458	0.00930297	0.0285034
ENSG00000163882.9	chr3	+	2	7.42499	0.00934502	0.0285865
ENSG00000259498.1	chr15	-	2	7.35328	0.00966613	0.0295217
ENSG00000198034.11	chrX	-	2	7.34883	0.0096864	0.0295366
ENSG00000205581.11	chr21	-	2	7.33242	0.0097617	0.0297189
ENSG00000142546.14	chr19	-	2	7.32507	0.00979562	0.029775
ENSG00000123600.20	chr2	-	2	7.31615	0.00983698	0.0298534
ENSG00000169925.17	chr9	-	2	7.30662	0.00988135	0.0299406
ENSG00000117228.11	chr1	-	2	7.2754	0.0100282	0.0303377
ENSG00000134954.14	chr11	-	2	7.25295	0.0101353	0.0306133
ENSG00000065054.14	chr16	+	3	4.96311	0.0101875	0.0307226
ENSG00000141552.18	chr17	+	2	7.23548	0.0102194	0.0307706
ENSG00000161203.13	chr3	+	2	7.22175	0.0102861	0.0309227
ENSG00000105514.8	chr19	-	2	7.19968	0.0103942	0.0311988
ENSG00000267107.8	chr19	-	3	4.92177	0.0105645	0.0316605
ENSG00000185825.17	chrX	-	2	7.13985	0.0106934	0.0319969
ENSG00000108679.13	chr17	-	2	7.12305	0.0107791	0.032203
ENSG00000127863.16	chr13	+	2	7.11139	0.010839	0.0323316
ENSG00000156110.15	chr10	+	2	7.10457	0.0108742	0.0323863
ENSG00000116132.12	chr1	+	3	4.88153	0.010925	0.032487
ENSG00000277791.5	chr17	+	2	7.07585	0.0110476	0.0327593
ENSG00000196652.12	chr7	+	2	7.06655	0.0110727	0.0327593
ENSG00000123080.12	chr1	+	2	7.06456	0.0110832	0.0327593
ENSG00000125107.19	chr16	-	2	7.06424	0.0110849	0.0327593
ENSG00000117114.20	chr1	+	3	4.83047	0.0114145	0.0336815
ENSG00000117298.16	chr1	-	3	4.81412	0.011576	0.0341057
ENSG00000169122.11	chr8	+	2	6.94814	0.011716	0.0344651
ENSG00000124588.22	chr6	+	2	6.9416	0.0117527	0.0345201
ENSG00000137275.16	chr6	+	2	6.92095	0.0118693	0.0348094
ENSG00000099260.11	chr1	+	2	6.91595	0.0118977	0.0348394
ENSG00000151247.13	chr4	-	2	6.87743	0.0121192	0.0354338
ENSG00000179818.14	chr2	-	2	6.84178	0.012328	0.0359896
ENSG00000160271.16	chr9	-	3	4.73549	0.0123863	0.0361048
ENSG00000054654.19	chr14	+	4	3.86423	0.0125187	0.0364326
ENSG00000074964.17	chr1	+	2	6.8058	0.0125427	0.0364326
ENSG00000136848.17	chr9	+	4	3.86275	0.0125558	0.0364326
ENSG00000121316.11	chr12	-	2	6.79589	0.0126025	0.0365131
ENSG00000136167.15	chr13	-	2	6.78281	0.012682	0.0366879
ENSG00000179051.14	chr1	-	2	6.77453	0.0127326	0.0367787
ENSG00000101224.18	chr20	+	2	6.73202	0.0129956	0.037482
ENSG00000011454.18	chr9	+	2	6.69592	0.0132236	0.0380823
ENSG00000106246.18	chr7	-	2	6.63447	0.0136214	0.0391693
ENSG00000067057.18	chr10	+	4	3.78655	0.0137496	0.0394786
ENSG00000065989.16	chr19	+	2	6.60416	0.0138224	0.0396284
ENSG00000224397.7	chr20	+	2	6.58052	0.0140083	0.0401013
ENSG00000112837.17	chr6	-	2	6.5716	0.0140419	0.0401375
ENSG00000187091.14	chr3	-	2	6.55619	0.014147	0.0403778
ENSG00000133313.15	chr18	+	2	6.55226	0.014174	0.0403948
ENSG00000150593.18	chr10	+	2	6.54828	0.0142013	0.0404125
ENSG00000139687.16	chr13	+	2	6.52259	0.0143792	0.0408432
ENSG00000090621.15	chr1	-	2	6.5203	0.0143952	0.0408432
ENSG00000131711.15	chr5	+	2	6.49056	0.0146044	0.0413755
ENSG00000164733.22	chr8	-	3	4.53079	0.0147828	0.0418192
ENSG00000173175.15	chr3	-	3	4.51491	0.0149877	0.0423364
ENSG00000198624.13	chr5	-	2	6.41931	0.015119	0.0426444
ENSG00000102804.15	chr13	-	4	3.69722	0.0153177	0.0430923
ENSG00000146147.15	chr6	+	2	6.39071	0.0153309	0.0430923
ENSG00000087008.16	chr4	-	2	6.3888	0.0153452	0.0430923
ENSG00000105576.15	chr19	-	3	4.48496	0.0153822	0.0430923
ENSG00000159023.22	chr1	+	2	6.3828	0.0153901	0.0430923
ENSG00000143420.19	chr1	-	2	6.37654	0.0154371	0.0431609
ENSG00000131873.7	chr15	-	2	6.32859	0.0158025	0.0441181
ENSG00000105855.10	chr7	+	2	6.32149	0.0158573	0.0442068
ENSG00000142937.12	chr1	+	2	6.3097	0.0159488	0.0443975
ENSG00000163072.16	chr2	+	2	6.28793	0.0161195	0.0448074
ENSG00000116044.16	chr2	-	2	6.25415	0.016388	0.0454881
ENSG00000140199.13	chr15	-	2	6.23089	0.0165758	0.0459427
ENSG00000153048.11	chr16	-	2	6.21699	0.0166891	0.0461899
ENSG00000130429.15	chr7	+	2	6.19805	0.0168447	0.0465535
ENSG00000168264.11	chr1	-	2	6.17765	0.0170141	0.0469541
ENSG00000131370.16	chr3	-	2	6.17358	0.0170482	0.0469805
ENSG00000189337.17	chr1	+	2	6.12251	0.0174814	0.0481051
ENSG00000182093.16	chr21	+	2	6.06982	0.0179407	0.0492984
ENSG00000173171.15	chr1	+	2	6.05925	0.0180345	0.0494852
ENSG00000176046.9	chr16	-	2	6.04201	0.0181884	0.0498363
ENSG00000163520.14	chr3	+	2	6.01765	0.0184084	0.0503671
ENSG00000091428.18	chr2	+	2	5.99093	0.0186837	0.0510476
ENSG00000160014.17	chr19	+	2	5.96642	0.0188804	0.0515114
ENSG00000186635.15	chr11	-	3	4.23939	0.0190505	0.0518949
ENSG00000132466.19	chr4	-	2	5.94569	0.019075	0.0518949
ENSG00000157600.12	chrX	+	2	5.91272	0.0193891	0.0526747
ENSG00000075785.14	chr3	+	3	4.19992	0.0197196	0.0534968
ENSG00000163156.12	chr1	+	2	5.86559	0.0198478	0.0537685
ENSG00000132205.11	chr18	+	2	5.8488	0.0200459	0.0542286
ENSG00000104635.15	chr8	+	2	5.81783	0.0203244	0.0549046
ENSG00000147065.17	chrX	+	2	5.79716	0.0205346	0.0553944
ENSG00000232310.8	chr6	-	2	5.78906	0.0206176	0.0555401
ENSG00000173264.15	chr11	+	2	5.76581	0.0208578	0.0561083
ENSG00000081870.12	chr1	-	2	5.75509	0.0209696	0.05633
ENSG00000112759.19	chr6	+	4	3.42489	0.0213095	0.0571631
ENSG00000162591.16	chr1	-	2	5.71857	0.0213552	0.0572056
ENSG00000184182.19	chr2	+	2	5.69761	0.0215799	0.0577269
ENSG00000013563.14	chrX	-	2	5.69093	0.0216521	0.0578394
ENSG00000182154.8	chr9	+	2	5.67308	0.0218794	0.0583654
ENSG00000004059.11	chr7	+	2	5.65252	0.0220721	0.0587977
ENSG00000106069.23	chr7	+	2	5.64498	0.0221555	0.058938
ENSG00000065802.12	chr2	+	2	5.65955	0.0222618	0.0591386
ENSG00000023734.11	chr12	+	2	5.63	0.0223224	0.0592177
ENSG00000128951.14	chr15	+	2	5.62496	0.0223789	0.0592856
ENSG00000154153.14	chr5	-	2	5.65963	0.02258	0.0597358
ENSG00000007237.19	chr17	-	4	3.36009	0.0230756	0.0609627
ENSG00000197702.14	chr11	+	3	4.01076	0.0232808	0.0614202
ENSG00000205189.12	chr8	+	2	5.53651	0.023395	0.0616368
ENSG00000163092.21	chr2	+	2	5.5784	0.0235641	0.0619972
ENSG00000138061.12	chr2	-	2	5.52839	0.0236712	0.0621113
ENSG00000116675.16	chr1	+	2	5.51309	0.0236722	0.0621113
ENSG00000076770.14	chrX	-	2	5.50116	0.0238148	0.0624001
ENSG00000101413.12	chr20	+	3	3.97875	0.0239463	0.0626589
ENSG00000107796.13	chr10	-	2	5.4872	0.0239829	0.0626691
ENSG00000121057.13	chr17	+	2	5.47998	0.0240703	0.0628121
ENSG00000105701.16	chr19	-	3	3.95787	0.024462	0.0636504
ENSG00000162772.17	chr1	+	3	3.95412	0.0244719	0.0636504
ENSG00000111245.17	chr12	-	3	3.96765	0.0244911	0.0636504
ENSG00000164951.16	chr8	+	2	5.42476	0.0247505	0.0642373
ENSG00000105409.19	chr19	-	2	5.40219	0.0250343	0.0648862
ENSG00000167641.11	chr19	-	2	5.37215	0.0254177	0.065708
ENSG00000131143.10	chr16	+	3	3.91089	0.0254231	0.065708
ENSG00000163872.16	chr3	+	2	5.36932	0.0254541	0.065708
ENSG00000177666.17	chr11	+	2	5.31941	0.0262883	0.0677702
ENSG00000166741.8	chr11	+	2	5.2908	0.0266713	0.0686652
ENSG00000019144.19	chr11	+	4	3.23563	0.0268235	0.0689645
ENSG00000175866.15	chr17	+	2	5.25643	0.0269547	0.0692091
ENSG00000186815.13	chr12	+	2	5.23379	0.0272671	0.0699176
ENSG00000172889.16	chr9	+	3	3.80296	0.0279688	0.0716211
ENSG00000136100.14	chr13	-	2	5.1803	0.0280207	0.0716582
ENSG00000196535.17	chr17	-	2	5.17578	0.0280854	0.0717282
ENSG00000070831.17	chr1	+	2	5.1293	0.0287602	0.073296
ENSG00000123124.14	chr8	+	2	5.12824	0.0287757	0.073296
ENSG00000162434.13	chr1	-	2	5.12037	0.0288919	0.0734942
ENSG00000145012.13	chr3	+	3	3.76436	0.0289421	0.0735244
ENSG00000115306.16	chr2	+	3	3.74855	0.0293506	0.0744636
ENSG00000062582.14	chr7	-	2	5.08136	0.0294747	0.0746796
ENSG00000105974.13	chr7	+	2	5.07629	0.0295513	0.074775
ENSG00000167491.17	chr19	+	2	5.03538	0.030178	0.0762144
ENSG00000123562.18	chrX	-	2	5.03398	0.0301997	0.0762144
ENSG00000124749.17	chr6	-	2	5.02176	0.0303897	0.0765932
ENSG00000105810.10	chr7	-	2	5.01799	0.0304487	0.0766411
ENSG00000022840.16	chr12	+	3	3.70207	0.030587	0.0768884
ENSG00000152601.17	chr3	+	2	5.0036	0.0306746	0.0770077
ENSG00000043143.21	chr5	+	3	3.69505	0.0307783	0.0771669
ENSG00000197360.9	chr19	-	2	4.96417	0.0313033	0.0783808
ENSG00000100628.12	chr14	-	2	4.94076	0.0316832	0.0792286
ENSG00000131828.14	chrX	+	2	4.93745	0.0317372	0.0792604
ENSG00000278311.5	chr17	+	2	4.93142	0.0318362	0.0794041
ENSG00000120833.14	chr12	+	4	3.08728	0.0321368	0.0800497
ENSG00000182796.14	chr12	+	2	4.89211	0.0324886	0.0808213
ENSG00000177311.11	chr3	+	2	4.88296	0.0326426	0.0810992
ENSG00000017260.20	chr3	+	2	4.87717	0.0327405	0.081237
ENSG00000092964.18	chr8	+	2	4.86896	0.0328796	0.0814768
ENSG00000270647.6	chr17	+	2	4.85766	0.0330724	0.081849
ENSG00000116754.13	chr1	+	2	4.83609	0.0334437	0.082572
ENSG00000181031.16	chr17	-	2	4.83569	0.0334507	0.082572
ENSG00000132561.14	chr8	+	2	4.82917	0.0337494	0.0832023
ENSG00000122417.15	chr1	-	2	4.80636	0.0339629	0.0835508
ENSG00000139842.15	chr13	+	2	4.80551	0.0339779	0.0835508
ENSG00000094916.16	chr12	-	2	4.79752	0.034119	0.0837118
ENSG00000179632.10	chr8	+	2	4.79686	0.0341307	0.0837118
ENSG00000103316.12	chr16	-	2	4.79248	0.0345273	0.0845765
ENSG00000082293.13	chr6	+	2	4.73941	0.0351647	0.085996
ENSG00000169554.22	chr2	-	3	3.54443	0.0351965	0.085996
ENSG00000189350.13	chr2	+	2	4.72068	0.0355089	0.086649
ENSG00000173065.13	chr17	-	2	4.69078	0.0360663	0.0878973
ENSG00000164116.17	chr4	+	2	4.68012	0.0362674	0.0882753
ENSG00000106070.20	chr7	-	2	4.6776	0.0363151	0.0882792
ENSG00000239523.6	chr3	+	2	4.6747	0.03637	0.0883009
ENSG00000198393.8	chr12	+	2	4.64815	0.0368776	0.0894201
ENSG00000198964.14	chr10	-	2	4.61658	0.037491	0.0907246
ENSG00000089159.17	chr12	-	2	4.61561	0.0375102	0.0907246
ENSG00000073711.11	chr3	+	2	4.60538	0.0377113	0.0910962
ENSG00000124440.16	chr19	+	3	3.46106	0.0379515	0.0915609
ENSG00000110665.12	chr11	-	2	4.56477	0.0385604	0.092913
ENSG00000140743.8	chr16	-	2	4.53553	0.0391177	0.0941377
ENSG00000136205.17	chr7	-	3	3.42055	0.0393195	0.0945048
ENSG00000100418.8	chr22	-	2	4.52302	0.0393756	0.0945116
ENSG00000119640.9	chr14	-	2	4.52083	0.0394209	0.0945116
ENSG00000166317.12	chr10	-	2	4.51728	0.0398299	0.095373
ENSG00000164850.15	chr7	+	2	4.49555	0.0399484	0.0955374
ENSG00000197530.12	chr1	+	2	4.48339	0.0402048	0.096031
ENSG00000102317.18	chrX	+	2	4.46535	0.0405885	0.0968267
ENSG00000168675.19	chr18	+	5	2.60563	0.0407152	0.0970084
ENSG00000185787.15	chr15	+	2	4.44962	0.0409264	0.0973905
ENSG00000138757.15	chr4	-	2	4.41881	0.041597	0.0988638
ENSG00000105321.14	chr19	+	2	4.3842	0.0423649	0.100564
ENSG00000204257.15	chr6	-	2	4.37725	0.0425636	0.100911
ENSG00000170365.10	chr4	+	2	4.37267	0.0426239	0.100929
ENSG00000055163.20	chr5	+	2	4.36986	0.0426873	0.100955
ENSG00000081189.16	chr5	-	2	4.36535	0.0427894	0.101072
ENSG00000132640.15	chr20	+	2	4.36202	0.0428649	0.101125
ENSG00000086666.19	chr15	+	2	4.35381	0.0430516	0.101441
ENSG00000181722.17	chr3	-	3	3.31251	0.0433226	0.101954
ENSG00000172613.8	chr11	+	2	4.31334	0.0439853	0.103387
ENSG00000136986.10	chr8	-	2	4.30548	0.0442126	0.103794
ENSG00000130985.17	chrX	+	2	4.2764	0.044857	0.105178
ENSG00000237773.7	chr7	-	2	4.26489	0.0451322	0.105694
ENSG00000115310.18	chr2	-	3	3.24593	0.0459974	0.107589
ENSG00000147140.17	chrX	+	2	4.22353	0.0461374	0.107785
ENSG00000125733.18	chr19	+	2	4.21413	0.0463693	0.108195
ENSG00000182199.11	chr12	+	3	3.2337	0.046507	0.108384
ENSG00000047849.21	chr3	-	4	2.78246	0.0466182	0.108512
ENSG00000121964.14	chr2	-	2	4.19834	0.0467616	0.108714
ENSG00000204217.15	chr2	+	2	4.19494	0.0468465	0.108779
ENSG00000162734.13	chr1	+	2	4.18984	0.0469742	0.108944
ENSG00000136143.16	chr13	-	2	4.16309	0.0476506	0.110379
ENSG00000147573.17	chr8	+	2	4.14942	0.0480001	0.111054
ENSG00000108691.9	chr17	+	2	4.16065	0.0482353	0.111464
ENSG00000163399.16	chr1	+	2	4.13242	0.0484389	0.111714
ENSG00000167106.12	chr9	-	3	3.188	0.0484635	0.111714
ENSG00000198218.11	chr3	-	2	4.12897	0.0485286	0.111714
ENSG00000149115.14	chr11	-	3	3.18542	0.0485763	0.111714
ENSG00000115468.12	chr2	+	2	4.12414	0.0486543	0.111742
ENSG00000100266.19	chr22	-	2	4.1222	0.0487049	0.111742
ENSG00000170989.10	chr1	+	2	4.11068	0.0490066	0.112245
ENSG00000188549.12	chr15	-	2	4.10759	0.0490879	0.112245
ENSG00000166483.12	chr11	+	2	4.11163	0.0490998	0.112245
ENSG00000110911.17	chr12	-	2	4.0932	0.0494681	0.112952
ENSG00000137094.15	chr9	+	3	3.16104	0.0496573	0.113243
ENSG00000104853.16	chr19	+	2	4.08398	0.0497135	0.113243
ENSG00000197321.15	chr10	-	3	3.15012	0.0501495	0.114101
ENSG00000068724.17	chr2	+	2	4.05554	0.050479	0.114714
ENSG00000111642.16	chr12	-	3	3.13528	0.0508266	0.115249
ENSG00000198947.17	chrX	-	3	3.13511	0.0508343	0.115249
ENSG00000172572.7	chr12	+	2	4.02397	0.051344	0.116267
ENSG00000110446.12	chr11	-	2	3.99251	0.0522221	0.118116
ENSG00000127472.11	chr1	+	2	3.99019	0.052408	0.118297
ENSG00000069122.19	chr6	-	2	3.9853	0.0524255	0.118297
ENSG00000145730.20	chr5	+	6	2.26278	0.0531197	0.119717
ENSG00000204922.5	chr11	+	2	3.95783	0.0532092	0.119717
ENSG00000130294.18	chr2	-	2	3.95668	0.0532424	0.119717
ENSG00000018189.13	chr4	+	2	3.94062	0.0537068	0.12062
ENSG00000089693.11	chr12	-	4	2.65654	0.0543696	0.121966
ENSG00000255248.9	chr11	-	3	3.05471	0.0547077	0.122581
ENSG00000275215.1	chr21	+	2	3.937	0.0547965	0.122637
ENSG00000186577.14	chr6	-	2	3.90113	0.0548676	0.122653
ENSG00000138772.13	chr4	+	2	3.89138	0.0551584	0.123039
ENSG00000178607.17	chr17	-	2	3.89104	0.0551688	0.123039
ENSG00000275131.3	chr1	-	2	3.88741	0.0553238	0.123119
ENSG00000168542.16	chr2	+	2	3.90326	0.0553476	0.123119
ENSG00000115963.14	chr2	-	2	3.88343	0.0553969	0.123119
ENSG00000105223.20	chr19	+	3	3.03809	0.0555	0.123205
ENSG00000077782.21	chr8	-	2	3.87137	0.0557608	0.123641
ENSG00000143337.19	chr1	+	2	3.86794	0.0558648	0.123728
ENSG00000168309.18	chr3	-	3	3.02773	0.0560238	0.123937
ENSG00000161513.12	chr17	-	2	3.8581	0.0561641	0.124104
ENSG00000120729.10	chr5	+	2	3.87772	0.0565618	0.124701
ENSG00000265107.3	chr1	-	2	3.87743	0.0565705	0.124701
ENSG00000151276.23	chr3	-	2	3.84294	0.056629	0.124701
ENSG00000171700.14	chr20	-	2	3.83974	0.0567276	0.124738
ENSG00000164713.10	chr7	+	3	3.01303	0.056776	0.124738
ENSG00000170175.11	chr17	+	3	3.0064	0.0571185	0.125347
ENSG00000158169.13	chr9	-	2	3.81376	0.0575357	0.126059
ENSG00000135778.12	chr1	+	2	3.81095	0.0576238	0.126059
ENSG00000126777.18	chr14	+	3	3.00436	0.0576402	0.126059
ENSG00000274104.1	chr19	-	2	3.7879	0.0583524	0.127471
ENSG00000057294.15	chr12	-	2	3.76381	0.0591249	0.129012
ENSG00000122550.18	chr7	+	2	3.75283	0.0594808	0.129641
ENSG00000144560.15	chr3	-	4	2.57871	0.0597937	0.130175
ENSG00000172262.11	chr5	+	3	2.9537	0.0599186	0.130299
ENSG00000171853.16	chr2	+	3	2.95201	0.0600104	0.130351
ENSG00000138674.17	chr4	-	2	3.7253	0.0603833	0.131013
ENSG00000136758.19	chr10	-	2	3.71812	0.0606213	0.13128
ENSG00000266094.8	chr1	+	2	3.71603	0.0606904	0.13128
ENSG00000144118.14	chr2	+	2	3.71539	0.0607119	0.13128
ENSG00000164953.16	chr8	+	2	3.70763	0.0609705	0.131691
ENSG00000163798.13	chr2	+	2	3.69916	0.0612542	0.132155
ENSG00000166025.18	chr11	+	2	3.69475	0.0614024	0.132326
ENSG00000171714.12	chr11	+	2	3.68115	0.0618625	0.133167
ENSG00000108389.9	chr17	-	2	3.67771	0.0619794	0.13327
ENSG00000111077.18	chr12	+	3	2.90187	0.062811	0.134906
ENSG00000073417.15	chr15	+	2	3.63728	0.0633719	0.135959
ENSG00000100242.15	chr22	-	3	2.88583	0.0637347	0.136552
ENSG00000079432.8	chr19	+	2	3.62531	0.0637908	0.136552
ENSG00000140382.15	chr15	+	2	3.62021	0.0639702	0.136636
ENSG00000090006.18	chr19	+	3	2.88174	0.0639725	0.136636
ENSG00000124422.12	chr17	-	2	3.60233	0.0646037	0.137789
ENSG00000116774.12	chr1	+	2	3.60086	0.0646561	0.137789
ENSG00000170525.21	chr10	+	3	2.86937	0.0648011	0.137945
ENSG00000145819.18	chr5	+	2	3.5905	0.0650267	0.138272
ENSG00000175538.11	chr11	-	2	3.58804	0.0651151	0.138306
ENSG00000114861.23	chr3	-	5	2.28972	0.065551	0.139078
ENSG00000178096.9	chr1	+	2	3.57194	0.0656965	0.139233
ENSG00000063244.13	chr19	+	2	3.56532	0.0659368	0.139588
ENSG00000101246.20	chr20	-	2	3.561	0.0660948	0.139717
ENSG00000138835.22	chr9	+	6	2.13799	0.0661838	0.139717
ENSG00000114738.11	chr3	+	2	3.55768	0.0662162	0.139717
ENSG00000131697.18	chr1	-	2	3.54747	0.0665909	0.140153
ENSG00000198431.16	chr12	+	4	2.49017	0.0666245	0.140153
ENSG00000127914.19	chr7	+	2	3.5444	0.0667042	0.140153
ENSG00000233237.8	chr6	-	2	3.5441	0.0667153	0.140153
ENSG00000108669.16	chr17	-	3	2.83025	0.0670468	0.140696
ENSG00000119333.12	chr9	-	2	3.53194	0.0671659	0.140791
ENSG00000179094.16	chr17	-	2	3.48436	0.0689612	0.144397
ENSG00000204310.13	chr6	-	2	3.48159	0.0690675	0.144462
ENSG00000071242.12	chr6	-	2	3.4755	0.0693015	0.144793
ENSG00000225377.6	chr20	-	2	3.47133	0.0694623	0.144872
ENSG00000095066.12	chr19	-	3	2.79104	0.0694903	0.144872
ENSG00000114854.8	chr3	-	2	3.46731	0.0696176	0.14498
ENSG00000104881.16	chr19	-	2	3.46388	0.0697506	0.145099
ENSG00000160360.13	chr9	+	3	2.79036	0.069917	0.145288
ENSG00000167081.18	chr9	+	2	3.45533	0.0700828	0.14537
ENSG00000151967.18	chr3	+	2	3.45469	0.0701079	0.14537
ENSG00000163848.20	chr3	-	2	3.45102	0.0702512	0.14551
ENSG00000197879.17	chr17	-	3	2.77677	0.0704018	0.145521
ENSG00000111913.20	chr6	-	2	3.447	0.0704084	0.145521
ENSG00000166963.13	chr15	+	2	3.44882	0.070586	0.145731
ENSG00000155755.19	chr2	-	2	3.43509	0.0708768	0.146115
ENSG00000123358.20	chr12	+	3	2.77977	0.0709465	0.146115
ENSG00000160180.16	chr21	-	2	3.43196	0.0710008	0.146115
ENSG00000113758.13	chr5	-	2	3.42388	0.0713211	0.146617
ENSG00000143554.14	chr1	+	2	3.3921	0.0725967	0.149032
ENSG00000068831.19	chr11	-	3	2.74173	0.0726939	0.149032
ENSG00000286054.1	chr21	+	2	3.38954	0.0727287	0.149032
ENSG00000115290.10	chr2	-	2	3.37638	0.073237	0.149913
ENSG00000172346.15	chr22	+	2	3.36522	0.0736954	0.150577
ENSG00000133069.17	chr1	+	3	2.72644	0.0737183	0.150577
ENSG00000077157.22	chr1	+	2	3.36164	0.0738432	0.150672
ENSG00000186073.14	chr15	+	2	3.35563	0.0740922	0.151019
ENSG00000106992.19	chr9	-	2	3.34798	0.0744101	0.151506
ENSG00000072210.19	chr17	+	2	3.33065	0.0751364	0.152823
ENSG00000048540.15	chr12	-	2	3.321	0.0755441	0.153489
ENSG00000118263.15	chr2	-	2	3.31781	0.0756791	0.1536
ENSG00000128563.13	chr7	+	2	3.3001	0.0764352	0.154971
ENSG00000110811.20	chr12	+	2	3.26264	0.0780629	0.158003
ENSG00000108984.15	chr17	+	2	3.2619	0.0780952	0.158003
ENSG00000117528.14	chr1	+	2	3.25979	0.0781883	0.158024
ENSG00000164591.14	chr5	+	2	3.2524	0.0785143	0.158516
ENSG00000127870.17	chr13	-	2	3.24575	0.078809	0.158944
ENSG00000168575.10	chr8	-	2	3.23223	0.0794124	0.159993
ENSG00000185022.12	chr22	+	2	3.22488	0.0797425	0.160489
ENSG00000277258.5	chr17	-	2	3.2188	0.0800164	0.160872
ENSG00000082458.12	chrX	+	3	2.62022	0.0812581	0.163197
ENSG00000139579.13	chr12	+	2	3.18537	0.0815433	0.163598
ENSG00000196504.19	chr2	-	2	3.17925	0.081826	0.163994
ENSG00000182809.11	chr14	+	3	2.60771	0.0821975	0.164567
ENSG00000178802.18	chr15	+	3	2.60283	0.0825662	0.165132
ENSG00000185973.12	chrX	-	2	3.161	0.0826765	0.165181
ENSG00000141013.17	chr16	+	2	3.15622	0.0829011	0.165457
ENSG00000165671.21	chr5	+	2	3.14602	0.0833821	0.166155
ENSG00000144596.13	chr3	-	2	3.14513	0.0834241	0.166155
ENSG00000165868.16	chr10	-	2	3.13096	0.0840981	0.167324
ENSG00000127483.19	chr1	-	2	3.12494	0.0843863	0.167501
ENSG00000169926.11	chr15	+	2	3.12332	0.084464	0.167501
ENSG00000153310.19	chr8	-	2	3.12317	0.0844712	0.167501
ENSG00000232119.8	chrX	+	2	3.12181	0.0845364	0.167501
ENSG00000012061.16	chr19	-	5	2.11662	0.0849051	0.168058
ENSG00000147862.17	chr9	-	2	3.11194	0.0850122	0.168096
ENSG00000134590.14	chrX	+	2	3.09948	0.085617	0.169118
ENSG00000158793.14	chr1	+	2	3.07636	0.0867523	0.171184
ENSG00000143740.15	chr1	+	3	2.53057	0.088241	0.173943
ENSG00000167797.8	chr11	-	2	3.03663	0.0887424	0.174751
ENSG00000185215.11	chr14	+	2	3.02604	0.0892817	0.175633
ENSG00000012223.13	chr3	-	2	3.01677	0.0897567	0.176387
ENSG00000079308.19	chr2	-	9	1.75234	0.0902434	0.177161
ENSG00000072195.15	chr2	+	4	2.24003	0.0904178	0.177322
ENSG00000103852.13	chr15	-	2	2.98736	0.0912825	0.178835
ENSG00000170619.10	chr8	-	2	2.97564	0.0918987	0.179859
ENSG00000182903.16	chr4	-	2	2.97012	0.0921902	0.180245
ENSG00000164050.13	chr3	-	2	2.96564	0.0924278	0.180526
ENSG00000146540.15	chr7	-	3	2.46994	0.0933125	0.182058
ENSG00000136603.14	chr3	+	2	2.94741	0.0934018	0.182058
ENSG00000158352.17	chrX	-	2	2.94377	0.0935979	0.182255
ENSG00000172757.13	chr11	-	2	2.90273	0.0958385	0.186428
ENSG00000032444.17	chr19	+	2	2.89251	0.0964058	0.187342
ENSG00000100813.14	chr14	-	2	2.88908	0.0965971	0.187523
ENSG00000156709.15	chrX	-	3	2.42681	0.0971032	0.188216
ENSG00000100906.11	chr14	-	2	2.8792	0.0971501	0.188216
ENSG00000159592.11	chr1	-	3	2.42124	0.0976038	0.188904
ENSG00000180035.13	chr16	+	2	2.86136	0.098158	0.189785
ENSG00000005238.20	chr9	-	2	2.85433	0.098559	0.190369
ENSG00000178860.9	chr8	-	2	2.85068	0.0987673	0.190484
ENSG00000128739.23	chr15	+	3	2.40787	0.0988175	0.190484
ENSG00000091436.17	chr2	+	3	2.40647	0.098946	0.190541
ENSG00000135636.14	chr2	+	2	2.83035	0.0999389	0.19226
ENSG00000169862.19	chr5	-	2	2.8212	0.100733	0.193592
ENSG00000114541.15	chr3	-	5	1.99373	0.101889	0.195619
ENSG00000213722.10	chr6	-	2	2.78865	0.102391	0.196386
ENSG00000219607.4	chr6	+	2	2.78674	0.102505	0.196408
ENSG00000115902.11	chr2	+	2	2.78056	0.102875	0.19692
ENSG00000176490.5	chr19	-	2	2.77815	0.103019	0.197
ENSG00000060656.20	chr1	+	2	2.77394	0.103272	0.197287
ENSG00000138411.13	chr2	-	2	2.75611	0.104352	0.199103
ENSG00000163947.12	chr3	-	3	2.34816	0.104431	0.199103
ENSG00000076944.16	chr19	+	2	2.75295	0.104545	0.199123
ENSG00000188176.12	chr17	+	2	2.75022	0.104712	0.199243
ENSG00000109819.9	chr4	-	2	2.72349	0.106361	0.202033
ENSG00000196498.13	chr12	-	4	2.10656	0.106388	0.202033
ENSG00000167740.10	chr17	+	2	2.71791	0.106709	0.202322
ENSG00000136560.14	chr2	+	2	2.71722	0.106752	0.202322
ENSG00000165458.14	chr11	+	2	2.71395	0.106956	0.20251
ENSG00000197461.13	chr7	-	2	2.70148	0.107741	0.203794
ENSG00000109332.20	chr4	-	3	2.30472	0.108721	0.205384
ENSG00000120885.22	chr8	-	2	2.68487	0.108796	0.205384
ENSG00000265972.6	chr1	-	2	2.68152	0.10955	0.206604
ENSG00000107968.10	chr10	+	2	2.67132	0.109665	0.206619
ENSG00000203880.12	chr20	+	2	2.66766	0.109902	0.206739
ENSG00000159128.15	chr21	+	2	2.66699	0.109945	0.206739
ENSG00000118900.15	chr16	+	2	2.6602	0.110385	0.207363
ENSG00000156030.13	chr14	-	2	2.65573	0.110675	0.207705
ENSG00000036448.10	chr8	+	3	2.2745	0.111812	0.209635
ENSG00000100599.16	chr14	+	2	2.63305	0.112163	0.210087
ENSG00000196405.13	chr14	+	3	2.26587	0.112712	0.210909
ENSG00000223865.11	chr6	+	2	2.61734	0.113208	0.21163
ENSG00000123154.12	chr19	+	3	2.25963	0.113367	0.211722
ENSG00000224051.7	chr1	+	2	2.61008	0.113694	0.212126
ENSG00000124313.18	chrX	-	2	2.59962	0.114399	0.213233
ENSG00000076108.12	chr12	-	2	2.59591	0.11465	0.213495
ENSG00000123815.13	chr19	-	4	2.04197	0.115087	0.213945
ENSG00000125618.18	chr2	-	2	2.58838	0.115162	0.213945
ENSG00000168214.21	chr4	+	2	2.5871	0.11525	0.213945
ENSG00000166398.14	chr19	+	2	2.58579	0.115338	0.213945
ENSG00000149091.15	chr11	+	4	2.03817	0.115621	0.214261
ENSG00000171604.12	chr5	+	2	2.57762	0.115898	0.214568
ENSG00000246273.8	chr11	+	2	2.57428	0.116179	0.214881
ENSG00000249464.6	chr4	+	2	2.56825	0.116543	0.215346
ENSG00000196352.16	chr1	+	2	2.5665	0.116664	0.215362
ENSG00000175287.19	chr9	+	2	2.56227	0.116957	0.215695
ENSG00000146083.12	chr5	-	2	2.55963	0.11714	0.215826
ENSG00000144331.20	chr2	-	3	2.22247	0.11735	0.216006
ENSG00000172845.17	chr2	-	3	2.21789	0.117851	0.216719
ENSG00000109501.14	chr4	+	2	2.54717	0.118009	0.216803
ENSG00000130529.16	chr19	+	2	2.54392	0.118237	0.217013
ENSG00000074266.22	chr11	+	2	2.53321	0.118993	0.217983
ENSG00000251562.8	chr11	+	2	2.53124	0.119132	0.217983
ENSG00000055609.20	chr7	-	2	2.53076	0.119166	0.217983
ENSG00000165192.14	chrX	-	2	2.52999	0.11922	0.217983
ENSG00000138303.18	chr10	-	3	2.19969	0.119863	0.21895
ENSG00000141540.11	chr17	+	2	2.51181	0.120517	0.219935
ENSG00000169071.15	chr9	-	2	2.50312	0.121143	0.220867
ENSG00000269113.4	chr1	-	2	2.50026	0.12135	0.221034
ENSG00000134686.18	chr1	-	2	2.48697	0.122315	0.222581
ENSG00000085563.15	chr7	-	2	2.47822	0.122956	0.223535
ENSG00000159314.11	chr17	-	3	2.16998	0.123225	0.223811
ENSG00000177548.13	chr16	-	2	2.46983	0.123574	0.224083
ENSG00000172403.11	chr4	+	2	2.48448	0.123608	0.224083
ENSG00000140795.13	chr16	-	4	1.97979	0.124123	0.22479
ENSG00000182175.14	chr15	-	2	2.46094	0.124232	0.22479
ENSG00000124831.19	chr2	+	3	2.14555	0.126062	0.227885
ENSG00000112183.15	chr6	+	2	2.43019	0.126543	0.228407
ENSG00000133878.9	chr8	-	2	2.42791	0.126715	0.228407
ENSG00000145391.14	chr4	-	2	2.42755	0.126743	0.228407
ENSG00000162909.18	chr1	+	2	2.42645	0.126827	0.228407
ENSG00000161011.20	chr5	+	3	2.13618	0.127167	0.228806
ENSG00000105323.17	chr19	+	2	2.41165	0.127959	0.230014
ENSG00000113657.13	chr5	-	2	2.40355	0.128583	0.23092
ENSG00000108219.15	chr10	+	2	2.39234	0.129453	0.232265
ENSG00000008324.12	chr3	+	2	2.38058	0.130373	0.233697
ENSG00000166444.19	chr11	-	3	2.10066	0.131452	0.235411
ENSG00000197565.16	chrX	-	2	2.35798	0.132163	0.236384
ENSG00000176978.14	chr9	-	2	2.35502	0.132399	0.236384
ENSG00000041982.16	chr9	-	2	2.36504	0.132402	0.236384
ENSG00000111912.20	chr6	+	4	1.92607	0.132488	0.236384
ENSG00000182606.17	chr3	+	2	2.34511	0.133224	0.237475
ENSG00000134504.14	chr18	-	2	2.32235	0.135042	0.240492
ENSG00000204520.14	chr6	+	2	2.32557	0.135388	0.240885
ENSG00000101752.12	chr18	+	3	2.06018	0.136518	0.24267
ENSG00000135679.25	chr12	+	2	2.29228	0.137528	0.244095
ENSG00000111639.8	chr12	-	2	2.29173	0.137574	0.244095
ENSG00000122986.14	chr12	-	2	2.28198	0.138392	0.245319
ENSG00000169813.16	chr10	-	3	2.04393	0.138607	0.245474
ENSG00000075234.17	chr22	+	2	2.24912	0.14119	0.249818
ENSG00000168405.17	chr6	-	3	2.02261	0.141399	0.249957
ENSG00000140939.14	chr16	+	2	2.24016	0.141964	0.250725
ENSG00000116922.14	chr1	-	2	2.22303	0.143458	0.253131
ENSG00000101997.13	chrX	+	2	2.21967	0.143754	0.253418
ENSG00000271952.2	chr2	+	2	2.21566	0.144107	0.253808
ENSG00000139146.14	chr12	-	2	2.21324	0.14432	0.25395
ENSG00000262879.6	chr17	-	2	2.20882	0.144712	0.254407
ENSG00000117595.12	chr1	-	2	2.21219	0.145047	0.254762
ENSG00000027001.10	chr13	-	2	2.19649	0.145809	0.255866
ENSG00000137501.17	chr11	-	2	2.19407	0.146026	0.256013
ENSG00000123636.18	chr2	-	2	2.17343	0.147889	0.259013
ENSG00000204634.13	chr2	-	2	2.17269	0.148008	0.259013
ENSG00000160392.13	chr19	-	2	2.16593	0.148573	0.259681
ENSG00000172159.16	chr9	-	2	2.16497	0.14866	0.259681
ENSG00000170892.13	chr19	+	2	2.16027	0.149091	0.259931
ENSG00000133401.16	chr5	+	2	2.15973	0.14914	0.259931
ENSG00000182979.18	chr14	+	3	1.96521	0.149209	0.259931
ENSG00000102265.12	chrX	+	3	1.96303	0.14963	0.260001
ENSG00000168556.7	chr4	+	2	2.15418	0.149651	0.260001
ENSG00000122378.14	chr10	+	2	2.15412	0.149657	0.260001
ENSG00000122644.13	chr7	+	2	2.14999	0.150038	0.260427
ENSG00000179988.15	chr10	+	2	2.14483	0.150516	0.26085
ENSG00000196923.14	chr5	-	2	2.14443	0.150553	0.26085
ENSG00000168283.14	chr10	+	2	2.13982	0.150982	0.261357
ENSG00000114439.19	chr3	+	2	2.13778	0.151172	0.26145
ENSG00000144476.6	chr2	+	2	2.12007	0.152834	0.264087
ENSG00000243678.12	chr17	+	2	2.11582	0.153237	0.264544
ENSG00000166206.15	chr15	-	2	2.10201	0.154552	0.266574
ENSG00000076864.19	chr1	-	2	2.09721	0.155012	0.267127
ENSG00000205220.12	chr16	-	2	2.09217	0.155497	0.267604
ENSG00000101639.18	chr18	+	2	2.09144	0.155567	0.267604
ENSG00000140718.21	chr16	+	2	2.07701	0.156967	0.269577
ENSG00000100196.11	chr22	+	2	2.07671	0.156996	0.269577
ENSG00000082014.17	chr7	-	2	2.07036	0.157616	0.270215
ENSG00000163485.17	chr1	+	2	2.07003	0.157649	0.270215
ENSG00000159267.16	chr21	-	2	2.0651	0.158132	0.270801
ENSG00000109670.16	chr4	-	3	1.89834	0.158872	0.271826
ENSG00000140859.16	chr16	-	2	2.0367	0.160954	0.27459
ENSG00000133943.21	chr14	+	2	2.03472	0.161153	0.27459
ENSG00000081923.15	chr18	-	2	2.03449	0.161177	0.27459
ENSG00000132153.15	chr3	+	2	2.03271	0.161356	0.27459
ENSG00000145703.16	chr5	+	2	2.03244	0.161434	0.27459
ENSG00000110321.19	chr11	-	6	1.61689	0.161481	0.27459
ENSG00000173960.14	chr2	+	2	2.03138	0.16149	0.27459
ENSG00000134138.20	chr15	-	4	1.7586	0.162263	0.27566
ENSG00000134982.17	chr5	+	2	2.01472	0.163179	0.276475
ENSG00000005302.19	chrX	+	2	2.01382	0.16327	0.276475
ENSG00000109572.14	chr4	+	2	2.01367	0.163286	0.276475
ENSG00000064042.18	chr4	+	3	1.86853	0.163386	0.276475
ENSG00000163820.15	chr3	-	2	2.01193	0.163464	0.276475
ENSG00000189308.11	chr4	-	2	2.00327	0.164352	0.277733
ENSG00000059145.19	chr16	-	2	1.9963	0.165071	0.278703
ENSG00000278189.1	chr21	+	2	2.00307	0.165461	0.279065
ENSG00000171492.14	chr1	+	2	1.99137	0.165582	0.279065
ENSG00000245532.9	chr11	+	2	1.99146	0.165752	0.279065
ENSG00000150527.17	chr14	+	2	1.98862	0.165868	0.279065
ENSG00000101972.19	chrX	+	2	1.98252	0.166504	0.279889
ENSG00000179915.24	chr2	-	3	1.84665	0.166784	0.280115
ENSG00000124788.19	chr6	-	2	1.97752	0.167027	0.280278
ENSG00000205133.12	chr8	-	2	1.97004	0.167865	0.281281
ENSG00000108312.15	chr17	-	2	1.96905	0.167918	0.281281
ENSG00000277443.3	chr6	+	2	1.95948	0.168931	0.282731
ENSG00000083312.18	chr5	+	2	1.95496	0.169412	0.283289
ENSG00000132005.9	chr19	-	2	1.94932	0.170016	0.284051
ENSG00000150995.20	chr3	+	2	1.94706	0.170258	0.284208
ENSG00000093144.19	chr6	-	2	1.9363	0.171417	0.285893
ENSG00000137168.8	chr6	-	2	1.93074	0.172019	0.286649
ENSG00000092969.12	chr1	+	2	1.93141	0.17254	0.287119
ENSG00000103496.15	chr16	+	2	1.92539	0.172601	0.287119
ENSG00000128585.18	chr7	+	2	1.91564	0.173668	0.288644
ENSG00000249307.7	chr4	+	2	1.90769	0.174544	0.289849
ENSG00000156113.24	chr10	-	2	1.90157	0.175221	0.290409
ENSG00000165795.23	chr14	-	3	1.79368	0.175314	0.290409
ENSG00000169519.21	chr11	+	2	1.90054	0.175336	0.290409
ENSG00000168273.8	chr3	+	2	1.8905	0.176455	0.292011
ENSG00000110492.16	chr11	+	2	1.89352	0.176709	0.292179
ENSG00000198517.10	chr7	+	2	1.87907	0.177741	0.293632
ENSG00000137843.12	chr15	+	2	1.86125	0.179766	0.296721
ENSG00000124772.12	chr6	-	3	1.76098	0.181365	0.299104
ENSG00000130695.16	chr1	+	2	1.84081	0.182123	0.300096
ENSG00000118473.22	chr1	+	2	1.82082	0.184464	0.303693
ENSG00000177119.17	chr12	+	2	1.81607	0.185025	0.304355
ENSG00000187720.14	chr15	+	2	1.80463	0.186387	0.306332
ENSG00000241058.4	chr10	-	2	1.79881	0.187084	0.307214
ENSG00000198589.14	chr4	-	2	1.79463	0.187585	0.307775
ENSG00000108387.15	chr17	-	3	1.71523	0.188788	0.309484
ENSG00000129116.19	chr4	+	3	1.70919	0.189868	0.310988
ENSG00000135077.9	chr5	-	3	1.70808	0.190068	0.311049
ENSG00000075292.19	chr2	+	2	1.77034	0.190538	0.311553
ENSG00000113580.15	chr5	-	2	1.76381	0.191342	0.312601
ENSG00000073910.23	chr13	+	5	1.55691	0.192386	0.31404
ENSG00000171914.16	chr15	+	2	1.75391	0.192566	0.314066
ENSG00000117616.18	chr1	-	2	1.7519	0.192988	0.314315
ENSG00000131788.16	chr1	-	2	1.75005	0.193046	0.314315
ENSG00000116731.22	chr1	+	2	1.73744	0.194626	0.316618
ENSG00000164849.10	chr7	+	2	1.73336	0.195141	0.317186
ENSG00000132906.18	chr1	-	2	1.72925	0.19566	0.31776
ENSG00000113441.16	chr5	+	2	1.72658	0.195999	0.318042
ENSG00000197050.11	chr19	+	2	1.72445	0.196269	0.318211
ENSG00000151726.15	chr4	-	3	1.66404	0.198153	0.320994
ENSG00000049759.20	chr18	+	2	1.68927	0.200804	0.325015
ENSG00000100605.17	chr14	-	2	1.68144	0.201831	0.326401
ENSG00000114480.13	chr3	-	2	1.67592	0.202559	0.327302
ENSG00000128918.15	chr15	-	3	1.63835	0.203032	0.32779
ENSG00000242259.9	chr22	-	2	1.66517	0.203985	0.329052
ENSG00000137486.17	chr11	-	2	1.65594	0.205219	0.330764
ENSG00000100138.15	chr22	-	3	1.62295	0.206016	0.331771
ENSG00000092098.17	chr14	+	2	1.64809	0.206275	0.33191
ENSG00000165929.13	chr14	-	2	1.64197	0.207103	0.332962
ENSG00000106348.18	chr7	-	2	1.63599	0.207917	0.333991
ENSG00000169764.16	chr2	+	3	1.60298	0.209954	0.33698
ENSG00000179348.12	chr3	-	2	1.61544	0.210741	0.337809
ENSG00000174851.16	chr11	-	2	1.61486	0.210822	0.337809
ENSG00000138413.14	chr2	-	2	1.60846	0.211712	0.338951
ENSG00000183230.17	chr10	-	2	1.60327	0.212436	0.339827
ENSG00000267082.1	chr19	+	2	1.60054	0.212819	0.340156
ENSG00000114867.22	chr3	+	3	1.58231	0.214112	0.341937
ENSG00000152217.20	chr18	+	2	1.58993	0.214314	0.341941
ENSG00000250722.6	chr5	-	2	1.58882	0.214471	0.341941
ENSG00000126001.16	chr20	+	2	1.58421	0.215124	0.342698
ENSG00000105204.14	chr19	-	2	1.57468	0.216485	0.344579
ENSG00000125746.18	chr19	-	2	1.55002	0.220052	0.349967
ENSG00000160710.18	chr1	-	2	1.54198	0.221231	0.351551
ENSG00000145675.15	chr5	+	5	1.45474	0.222362	0.353056
ENSG00000168734.14	chr20	+	2	1.52629	0.223554	0.35437
ENSG00000118137.10	chr11	-	2	1.53219	0.223644	0.35437
ENSG00000131196.18	chr18	+	2	1.52501	0.223744	0.35437
ENSG00000099991.18	chr22	+	2	1.52245	0.224126	0.35458
ENSG00000162458.13	chr1	+	2	1.52132	0.224295	0.35458
ENSG00000144824.21	chr3	+	4	1.4885	0.224432	0.35458
ENSG00000186352.9	chr4	+	2	1.51242	0.225633	0.356184
ENSG00000188312.14	chr9	+	2	1.51082	0.225874	0.356272
ENSG00000120742.11	chr3	-	2	1.50852	0.226221	0.356394
ENSG00000147130.14	chrX	-	2	1.50785	0.226323	0.356394
ENSG00000126970.16	chrX	-	2	1.50661	0.22651	0.356396
ENSG00000135631.17	chr2	-	2	1.50123	0.227326	0.357387
ENSG00000117707.16	chr1	+	3	1.51478	0.228297	0.358619
ENSG00000164830.19	chr8	+	3	1.51117	0.229083	0.359559
ENSG00000146592.17	chr7	+	2	1.48779	0.229382	0.359735
ENSG00000139567.13	chr12	+	3	1.50576	0.230264	0.360823
ENSG00000042753.12	chr19	-	2	1.46944	0.232227	0.363602
ENSG00000236404.10	chr9	-	3	1.49517	0.232597	0.363884
ENSG00000171631.16	chr11	+	3	1.49313	0.233049	0.364293
ENSG00000247271.7	chr11	+	2	1.45858	0.233931	0.365374
ENSG00000137070.18	chr9	+	2	1.4508	0.23516	0.366844
ENSG00000099917.17	chr22	+	3	1.48323	0.235255	0.366844
ENSG00000069020.18	chr5	+	4	1.44767	0.235621	0.367117
ENSG00000187288.12	chr3	-	2	1.44886	0.236463	0.36813
ENSG00000198668.13	chr14	+	2	1.43465	0.23774	0.369818
ENSG00000031003.10	chr5	-	2	1.43031	0.23844	0.370476
ENSG00000166508.18	chr7	-	2	1.42963	0.238549	0.370476
ENSG00000275915.1	chr1	+	2	1.42602	0.239134	0.371083
ENSG00000239305.7	chr2	-	2	1.42437	0.2394	0.371196
ENSG00000240771.8	chr12	+	2	1.42233	0.239733	0.371255
ENSG00000161958.11	chr17	+	3	1.46303	0.239825	0.371255
ENSG00000068028.17	chr3	-	2	1.41807	0.240426	0.371884
ENSG00000140632.17	chr16	-	3	1.45863	0.240832	0.371956
ENSG00000102678.7	chr13	+	2	1.41541	0.24086	0.371956
ENSG00000115904.14	chr2	-	2	1.40786	0.242098	0.373567
ENSG00000151503.13	chr11	-	2	1.4036	0.242801	0.373614
ENSG00000213741.11	chr14	-	2	1.40303	0.242894	0.373614
ENSG00000128272.16	chr22	+	2	1.40296	0.242905	0.373614
ENSG00000120549.18	chr10	+	2	1.40233	0.243009	0.373614
ENSG00000104976.12	chr19	+	2	1.40177	0.243102	0.373614
ENSG00000133121.21	chr13	-	3	1.44442	0.244116	0.374871
ENSG00000134294.14	chr12	-	2	1.38969	0.245111	0.376004
ENSG00000105438.9	chr19	-	2	1.38813	0.24537	0.376004
ENSG00000099797.15	chr19	+	2	1.38771	0.245442	0.376004
ENSG00000179526.17	chr8	-	3	1.43552	0.246197	0.376861
ENSG00000129009.13	chr15	+	2	1.37807	0.247061	0.377881
ENSG00000140650.12	chr16	+	2	1.3698	0.248462	0.379721
ENSG00000170906.16	chr19	+	2	1.36193	0.249803	0.381466
ENSG00000073670.14	chr17	+	2	1.33759	0.254013	0.387217
ENSG00000065882.16	chr4	+	2	1.33671	0.254166	0.387217
ENSG00000185129.8	chr5	+	2	1.33667	0.254174	0.387217
ENSG00000168386.18	chr3	-	2	1.33674	0.254686	0.387487
ENSG00000134897.14	chr13	+	2	1.33335	0.254756	0.387487
ENSG00000105373.19	chr19	+	3	1.38382	0.258649	0.393097
ENSG00000173406.16	chr1	-	2	1.29146	0.262239	0.398238
ENSG00000138964.17	chr22	+	2	1.28984	0.262533	0.398369
ENSG00000110871.15	chr12	-	2	1.27979	0.264373	0.400843
ENSG00000069424.15	chr1	+	3	1.35947	0.264776	0.401137
ENSG00000141524.17	chr17	-	2	1.26568	0.266983	0.404162
ENSG00000104951.16	chr19	-	2	1.25917	0.268198	0.405682
ENSG00000164741.15	chr8	-	3	1.34347	0.268817	0.406296
ENSG00000124155.18	chr20	+	3	1.33052	0.272169	0.410922
ENSG00000110429.14	chr11	-	2	1.23746	0.272305	0.410922
ENSG00000123143.13	chr19	+	2	1.23174	0.2734	0.41225
ENSG00000085276.19	chr3	-	3	1.32245	0.274278	0.413249
ENSG00000117859.19	chr1	+	2	1.22249	0.275183	0.414286
ENSG00000110237.5	chr11	+	2	1.22083	0.275504	0.414444
ENSG00000134201.12	chr1	+	2	1.19536	0.280498	0.421494
ENSG00000164054.15	chr3	-	2	1.19375	0.280818	0.421494
ENSG00000008130.15	chr1	-	2	1.19107	0.281351	0.421494
ENSG00000096696.14	chr6	+	2	1.1906	0.281444	0.421494
ENSG00000142230.13	chr19	+	3	1.29543	0.281465	0.421494
ENSG00000162433.15	chr1	+	3	1.29455	0.281704	0.421494
ENSG00000105699.17	chr19	+	2	1.18918	0.281729	0.421494
ENSG00000002933.9	chr7	+	2	1.18559	0.282446	0.422237
ENSG00000128487.18	chr17	+	2	1.17794	0.283983	0.424206
ENSG00000173928.4	chr19	+	2	1.17541	0.284494	0.424637
ENSG00000204138.13	chr1	+	2	1.1687	0.285852	0.426333
ENSG00000243156.9	chr22	-	2	1.15446	0.288768	0.430347
ENSG00000089157.16	chr12	-	2	1.14762	0.290181	0.432117
ENSG00000198715.13	chr1	-	2	1.14537	0.290649	0.432479
ENSG00000269313.5	chrX	+	2	1.13922	0.29193	0.434048
ENSG00000073849.16	chr3	+	3	1.25462	0.292694	0.434406
ENSG00000067064.12	chr10	-	2	1.13497	0.29282	0.434406
ENSG00000093183.14	chr3	-	2	1.13483	0.29285	0.434406
ENSG00000126883.17	chr9	+	2	1.12699	0.2945	0.436516
ENSG00000131446.17	chr5	-	4	1.25177	0.297031	0.439928
ENSG00000115935.18	chr2	-	3	1.23213	0.299077	0.442616
ENSG00000158747.15	chr1	+	2	1.10217	0.299809	0.443195
ENSG00000184060.11	chr17	+	2	1.10161	0.299931	0.443195
ENSG00000185236.12	chr19	+	2	1.10054	0.300162	0.443195
[truncated: 619 more rows]

## Sheet: RNAseq.DIU.M
GeneID	NExons	gene.F	P.Value	FDR
[truncated: 6,636 more rows]

## Sheet: RNAseq.DIU.F
GeneID	NExons	gene.F	P.Value	FDR
[truncated: 8,539 more rows]
