# Supplementary material for: Sex modulates the human genome regulatory network during heart failure and aging.
Source: Research Square preprint supplement (doi:10.21203/rs.3.rs-2202852/v1), 2022-11-11
Supplement: Supplementary file 5 [file e7c208dcc7a456c9e3c43e12.xlsx]

## Sheet: CAGE.DPU
geneId	cluster_chr	cluster_strand	NExons	gene.F	P.Value	FDR
ENSG00000129824.16	chrY	+	2	3762.86	2.4008e-140	4.54952e-137
ENSG00000140416.23	chr15	+	7	16.9542	1.99397e-18	1.88929e-15
ENSG00000004799.8	chr7	-	3	30.8709	5.25587e-13	3.31996e-10
ENSG00000111716.14	chr12	-	3	29.4325	1.76329e-12	8.35359e-10
ENSG00000228474.6	chr2	-	2	50.4857	1.64862e-11	6.24826e-09
ENSG00000149809.17	chr11	+	2	49.6809	2.3025e-11	7.01839e-09
ENSG00000156467.10	chr8	-	3	26.2865	2.59255e-11	7.01839e-09
ENSG00000152061.23	chr1	+	3	24.1579	1.63928e-10	3.88305e-08
ENSG00000149925.22	chr16	+	4	16.4776	3.70748e-10	7.80631e-08
ENSG00000100097.12	chr22	+	3	22.2083	9.04103e-10	1.71328e-07
ENSG00000140264.21	chr15	+	3	21.999	1.08715e-09	1.87286e-07
ENSG00000213853.10	chr16	-	2	39.6768	1.60969e-09	2.54196e-07
ENSG00000211445.12	chr5	+	3	21.3037	2.00887e-09	2.92832e-07
ENSG00000110700.7	chr11	-	2	38.3826	2.82624e-09	3.82552e-07
ENSG00000166710.21	chr15	+	2	38.2125	3.04408e-09	3.84569e-07
ENSG00000077522.14	chr1	+	3	19.4305	1.06253e-08	1.25844e-06
ENSG00000071082.11	chr2	+	2	35.0873	1.20275e-08	1.34071e-06
ENSG00000173598.14	chr12	+	2	34.1832	1.79645e-08	1.79594e-06
ENSG00000160209.19	chr21	+	3	18.8413	1.80068e-08	1.79594e-06
ENSG00000139112.11	chr12	+	3	18.5267	2.38815e-08	2.26277e-06
ENSG00000135077.9	chr5	-	3	18.3297	2.8506e-08	2.57233e-06
ENSG00000105220.17	chr19	+	3	18.0729	3.59156e-08	3.09364e-06
ENSG00000134294.14	chr12	-	2	32.3108	4.1459e-08	3.41586e-06
ENSG00000126267.11	chr19	+	2	31.6763	5.51342e-08	4.3533e-06
ENSG00000114867.22	chr3	+	3	17.389	6.65634e-08	4.86939e-06
ENSG00000109819.9	chr4	-	2	31.1805	6.9312e-08	4.86939e-06
ENSG00000204628.12	chr5	-	5	10.0931	6.93792e-08	4.86939e-06
ENSG00000266412.6	chr10	-	2	30.7148	8.50694e-08	5.75737e-06
ENSG00000108946.15	chr17	+	4	12.3675	8.91236e-08	5.82377e-06
ENSG00000135390.21	chr12	-	3	16.9881	9.56731e-08	6.04335e-06
ENSG00000151067.22	chr12	+	2	30.1356	1.10579e-07	6.64971e-06
ENSG00000172270.22	chr19	+	5	9.82173	1.12291e-07	6.64971e-06
ENSG00000110955.9	chr12	-	3	16.7264	1.21295e-07	6.96527e-06
ENSG00000147684.10	chr8	+	2	29.5333	1.4536e-07	7.90012e-06
ENSG00000142676.14	chr1	+	2	29.525	1.45912e-07	7.90012e-06
ENSG00000196502.12	chr16	-	2	29.3907	1.55102e-07	8.1644e-06
ENSG00000132002.9	chr19	-	2	28.8241	2.01249e-07	1.03072e-05
ENSG00000132475.10	chr17	-	3	16.0618	2.21897e-07	1.10657e-05
ENSG00000036448.10	chr8	+	3	15.8376	2.72187e-07	1.32255e-05
ENSG00000131143.10	chr16	+	3	15.5943	3.39846e-07	1.61002e-05
ENSG00000170525.21	chr10	+	3	15.3411	4.28744e-07	1.93728e-05
ENSG00000174437.17	chr12	+	7	6.85084	4.29371e-07	1.93728e-05
ENSG00000023171.18	chr11	+	3	15.2944	4.46968e-07	1.96978e-05
ENSG00000105193.9	chr19	-	2	27.0269	4.57743e-07	1.97142e-05
ENSG00000182899.17	chr3	+	2	26.8912	4.87285e-07	2.05201e-05
ENSG00000095794.19	chr10	+	3	15.0131	5.78176e-07	2.38184e-05
ENSG00000163110.15	chr4	+	3	14.974	5.99269e-07	2.4162e-05
ENSG00000151150.22	chr10	-	4	10.7319	8.12555e-07	3.2079e-05
ENSG00000115053.17	chr2	-	3	14.4318	9.85559e-07	3.76067e-05
ENSG00000114062.22	chr15	-	2	25.3546	9.92262e-07	3.76067e-05
ENSG00000127483.19	chr1	-	2	25.2149	1.05885e-06	3.93437e-05
ENSG00000197746.14	chr10	-	3	14.0329	1.42248e-06	5.18385e-05
ENSG00000107317.13	chr9	+	3	13.9132	1.58835e-06	5.59163e-05
ENSG00000196704.14	chr17	+	2	24.2725	1.64308e-06	5.59163e-05
ENSG00000176728.10	chrY	-	2	24.2689	1.64588e-06	5.59163e-05
ENSG00000136942.15	chr9	-	3	13.8703	1.65241e-06	5.59163e-05
ENSG00000109971.14	chr11	-	3	13.8173	1.73512e-06	5.7685e-05
ENSG00000237773.7	chr7	-	2	24.0637	1.81376e-06	5.926e-05
ENSG00000185022.12	chr22	+	2	23.9409	1.92542e-06	6.0849e-05
ENSG00000099622.14	chr19	+	3	13.7038	1.92662e-06	6.0849e-05
ENSG00000265972.6	chr1	-	2	23.8911	1.96412e-06	6.10166e-05
ENSG00000014641.21	chr2	+	2	23.6313	2.2186e-06	6.78104e-05
ENSG00000163964.18	chr3	+	2	23.1133	2.82988e-06	8.5121e-05
ENSG00000173812.11	chr17	+	2	23.0315	2.94095e-06	8.64042e-05
ENSG00000241837.7	chr21	-	3	13.2376	2.96373e-06	8.64042e-05
ENSG00000184060.11	chr17	+	2	22.9178	3.10266e-06	8.8475e-05
ENSG00000101335.10	chr20	+	3	13.1793	3.12814e-06	8.8475e-05
ENSG00000196482.18	chr1	-	5	7.91473	3.32553e-06	9.13659e-05
ENSG00000184007.22	chr1	-	3	13.1128	3.32678e-06	9.13659e-05
ENSG00000078114.19	chr10	-	7	6.03189	3.53482e-06	9.56927e-05
ENSG00000084090.14	chr2	-	2	22.5866	3.62691e-06	9.68027e-05
ENSG00000170906.16	chr19	+	2	22.4734	3.82613e-06	9.99863e-05
ENSG00000130528.12	chr19	-	2	22.4592	3.85171e-06	9.99863e-05
ENSG00000155657.28	chr2	-	6	6.73479	3.9326e-06	0.000100706
ENSG00000132471.12	chr17	-	2	22.152	4.45366e-06	0.000111097
ENSG00000173113.7	chr11	-	2	22.1511	4.45559e-06	0.000111097
ENSG00000102316.17	chrX	+	3	12.6493	5.11206e-06	0.00012581
ENSG00000105379.10	chr19	-	2	21.688	5.54874e-06	0.000134806
ENSG00000117228.11	chr1	-	2	21.5292	5.9999e-06	0.000143922
ENSG00000153774.9	chr16	-	2	21.4281	6.27719e-06	0.000148691
ENSG00000123080.12	chr1	+	2	21.2013	6.99211e-06	0.000163581
ENSG00000136436.15	chr17	+	3	12.2751	7.23785e-06	0.000167265
ENSG00000115306.16	chr2	+	3	12.2263	7.57404e-06	0.000171504
ENSG00000104763.20	chr8	-	7	5.73278	7.60227e-06	0.000171504
ENSG00000115183.15	chr2	+	2	20.8781	8.15549e-06	0.000181819
ENSG00000134333.14	chr11	+	2	20.8245	8.36666e-06	0.000184358
ENSG00000231500.7	chr6	+	2	20.5988	9.32925e-06	0.000202204
ENSG00000131730.16	chr5	+	3	11.9955	9.38993e-06	0.000202204
ENSG00000104529.17	chr8	-	2	20.544	9.56483e-06	0.000203318
ENSG00000138347.16	chr10	+	2	20.5241	9.65628e-06	0.000203318
ENSG00000168309.18	chr3	-	3	11.8721	1.05344e-05	0.00021937
ENSG00000133835.17	chr5	+	2	20.3024	1.07355e-05	0.000221129
ENSG00000111640.15	chr12	+	3	11.8017	1.12493e-05	0.00022922
ENSG00000134419.15	chr16	-	2	20.1698	1.14389e-05	0.000230602
ENSG00000136156.15	chr13	+	3	11.7518	1.17854e-05	0.000235088
ENSG00000166228.9	chr10	-	2	19.9894	1.24712e-05	0.000246176
ENSG00000205678.8	chr4	-	2	19.7888	1.37307e-05	0.000268243
ENSG00000166681.14	chrX	+	2	19.5724	1.52342e-05	0.000294579
ENSG00000172348.15	chr6	-	2	19.5079	1.57311e-05	0.000301115
ENSG00000198842.10	chr1	+	3	11.2227	1.93214e-05	0.00036614
ENSG00000182196.13	chr12	+	2	19.0303	1.97761e-05	0.000371046
ENSG00000124831.19	chr2	+	3	11.1583	2.05206e-05	0.00038124
ENSG00000175084.12	chr2	+	4	8.34673	2.08932e-05	0.00038247
ENSG00000087274.17	chr4	+	3	11.1342	2.09905e-05	0.00038247
ENSG00000129991.13	chr19	-	2	18.7221	2.29653e-05	0.000414469
ENSG00000185201.17	chr11	+	2	18.684	2.33742e-05	0.000416961
ENSG00000198467.16	chr9	-	4	8.259	2.35434e-05	0.000416961
ENSG00000137767.14	chr15	+	2	18.5168	2.53429e-05	0.000442391
ENSG00000101210.13	chr20	-	3	10.9287	2.54462e-05	0.000442391
ENSG00000114391.13	chr3	-	2	18.2393	2.8987e-05	0.000499367
ENSG00000196652.12	chr7	+	2	18.1904	2.96827e-05	0.000506745
ENSG00000267107.8	chr19	-	3	10.6986	3.15749e-05	0.000534236
ENSG00000010256.11	chr3	-	2	18.0386	3.19503e-05	0.000535803
ENSG00000143947.15	chr2	+	2	17.9256	3.37528e-05	0.000561066
ENSG00000115602.17	chr2	+	2	17.7269	3.72471e-05	0.000611367
ENSG00000197694.18	chr9	+	2	17.7131	3.7424e-05	0.000611367
ENSG00000237125.11	chr4	+	3	10.4867	3.85285e-05	0.000624031
ENSG00000169554.22	chr2	-	3	10.4588	3.95496e-05	0.000635139
ENSG00000173918.15	chr17	+	5	6.51553	3.99055e-05	0.00063547
ENSG00000003402.20	chr2	+	4	7.84991	4.11794e-05	0.000650292
ENSG00000277791.5	chr17	+	2	17.2738	4.63533e-05	0.000725947
ENSG00000146701.12	chr7	+	2	17.0481	5.17514e-05	0.000788313
ENSG00000171877.21	chr15	-	2	17.0399	5.19589e-05	0.000788313
ENSG00000118194.20	chr1	-	7	4.97386	5.23324e-05	0.000788313
ENSG00000109846.9	chr11	-	4	7.67423	5.23607e-05	0.000788313
ENSG00000140795.13	chr16	-	4	7.67347	5.24155e-05	0.000788313
ENSG00000165995.22	chr10	+	3	10.1324	5.37652e-05	0.000802244
ENSG00000184489.13	chr8	+	4	7.63951	5.49069e-05	0.00081288
ENSG00000116132.12	chr1	+	3	10.0831	5.63197e-05	0.000827332
ENSG00000197360.9	chr19	-	2	16.7429	6.00838e-05	0.000875837
ENSG00000165629.20	chr10	+	3	9.96278	6.30833e-05	0.000912541
ENSG00000135447.17	chr12	-	2	16.0865	8.29202e-05	0.00119041
ENSG00000100124.15	chr22	-	2	15.9749	8.76003e-05	0.00124814
ENSG00000198832.10	chr22	-	2	15.9385	8.91842e-05	0.00126122
ENSG00000104325.7	chr8	+	2	15.9103	9.04323e-05	0.00126221
ENSG00000135218.19	chr7	+	7	4.75609	9.05859e-05	0.00126221
ENSG00000148985.20	chr11	+	3	9.54524	9.35497e-05	0.00129399
ENSG00000082014.17	chr7	-	2	15.802	9.53861e-05	0.00130983
ENSG00000175334.8	chr11	+	2	15.6863	0.000100989	0.0013768
ENSG00000167863.12	chr17	-	2	15.6565	0.000102485	0.0013872
ENSG00000198755.11	chr6	+	2	15.6201	0.000104343	0.00140234
ENSG00000178982.10	chr19	+	2	15.5143	0.000109936	0.0014671
ENSG00000154556.18	chr4	-	7	4.66676	0.000113377	0.00150244
ENSG00000132507.18	chr17	+	2	15.3704	0.000118042	0.00154457
ENSG00000129675.16	chrX	-	2	15.3679	0.000118186	0.00154457
ENSG00000167680.17	chr19	-	2	15.2969	0.00012241	0.00158882
ENSG00000100906.11	chr14	-	2	15.2466	0.0001255	0.00161784
ENSG00000137497.18	chr11	-	4	6.99404	0.000132791	0.00170026
ENSG00000113742.14	chr5	+	4	6.94991	0.000141059	0.001794
ENSG00000224397.7	chr20	+	2	14.991	0.000142437	0.00179946
ENSG00000143226.15	chr1	+	2	14.9578	0.000145013	0.0018136
ENSG00000126247.11	chr19	+	3	9.07551	0.000145899	0.0018136
ENSG00000132510.11	chr17	+	3	9.07261	0.000146428	0.0018136
ENSG00000158435.8	chr2	+	2	14.9056	0.000148601	0.00182857
ENSG00000107798.18	chr10	-	2	14.8764	0.000150772	0.00184331
ENSG00000143761.16	chr1	+	2	14.8546	0.000152412	0.00184649
ENSG00000110651.12	chr11	+	3	9.02549	0.000152981	0.00184649
ENSG00000074416.14	chr3	-	2	14.8103	0.000155804	0.00186079
ENSG00000085733.16	chr11	+	2	14.7961	0.000156902	0.00186079
ENSG00000152689.18	chr2	+	3	8.99738	0.000157112	0.00186079
ENSG00000139644.13	chr12	+	2	14.7599	0.000159754	0.00188034
ENSG00000178802.18	chr15	+	3	8.88203	0.000175271	0.00204916
ENSG00000223865.11	chr6	+	2	14.5621	0.00017626	0.00204916
ENSG00000164587.13	chr5	-	3	8.82469	0.000185068	0.00213844
ENSG00000275131.3	chr1	-	2	14.2493	0.000205987	0.00236458
ENSG00000177830.18	chr11	-	2	14.2381	0.000207135	0.00236458
ENSG00000080503.24	chr9	+	4	6.64594	0.000213838	0.00242649
ENSG00000221983.8	chr19	+	2	14.1574	0.00021565	0.00243248
ENSG00000109756.9	chr4	+	5	5.53011	0.000227842	0.00255479
ENSG00000100316.16	chr22	-	2	14.0081	0.000232344	0.00258995
ENSG00000172239.14	chr5	-	2	13.8625	0.000249897	0.00276933
ENSG00000173451.7	chr12	+	2	13.8331	0.000253771	0.00279591
ENSG00000073578.17	chr5	+	3	8.42041	0.000271715	0.0029763
ENSG00000183955.13	chr12	+	2	13.6611	0.00027641	0.00301033
ENSG00000158747.15	chr1	+	2	13.5971	0.000285433	0.00309083
ENSG00000162614.19	chr1	+	3	8.27982	0.000310603	0.00334427
ENSG00000112531.17	chr6	+	2	13.3613	0.000321294	0.00343984
ENSG00000064225.12	chr3	+	2	13.3336	0.000325794	0.00346842
ENSG00000075624.17	chr7	-	2	13.294	0.000332342	0.00351837
ENSG00000137168.8	chr6	-	2	13.276	0.000335372	0.00353072
ENSG00000173641.18	chr1	-	2	13.2104	0.000346624	0.00362902
ENSG00000144824.21	chr3	+	4	6.28869	0.000348844	0.00363219
ENSG00000142546.14	chr19	-	2	13.1731	0.000353182	0.00365727
ENSG00000140382.15	chr15	+	2	13.1492	0.000357456	0.0036814
ENSG00000242282.6	chr2	-	2	13.1107	0.000364456	0.00373321
ENSG00000138061.12	chr2	-	2	13.0464	0.000376645	0.00383732
ENSG00000138594.14	chr15	+	2	12.7135	0.000445291	0.00451245
ENSG00000086848.15	chr11	-	2	12.6829	0.000452281	0.00455889
ENSG00000117616.18	chr1	-	2	12.6501	0.000459797	0.00461013
ENSG00000153187.20	chr1	-	4	6.06969	0.000470549	0.0046928
ENSG00000112137.18	chr6	+	3	7.8378	0.000473337	0.0046928
ENSG00000105701.16	chr19	-	3	7.83305	0.000475471	0.0046928
ENSG00000198715.13	chr1	-	2	12.5402	0.000486099	0.00475767
ENSG00000142507.10	chr17	+	2	12.5362	0.000487065	0.00475767
ENSG00000196352.16	chr1	+	2	12.4727	0.000502977	0.00486642
ENSG00000134905.17	chr13	-	2	12.4713	0.000503334	0.00486642
ENSG00000188730.5	chr7	+	2	12.424	0.000515537	0.0049591
ENSG00000161955.16	chr17	+	2	12.4007	0.000521674	0.00499248
ENSG00000069275.13	chr1	-	2	12.3909	0.000524277	0.00499248
ENSG00000079215.15	chr5	+	3	7.72166	0.000528811	0.00501049
ENSG00000236714.3	chr5	+	2	12.3038	0.000548123	0.00516763
ENSG00000178573.7	chr16	-	2	12.1739	0.000585279	0.00549061
ENSG00000083845.9	chr19	+	2	12.1425	0.000594691	0.00555143
ENSG00000105401.9	chr19	-	2	12.1216	0.000601018	0.00558298
ENSG00000139567.13	chr12	+	3	7.58235	0.000604083	0.00558409
ENSG00000168386.18	chr3	-	2	12.0364	0.00062766	0.00577387
ENSG00000204310.13	chr6	-	2	11.924	0.000664543	0.00608362
ENSG00000152795.18	chr4	-	2	11.8759	0.000681033	0.00617736
ENSG00000166348.19	chr10	-	2	11.8751	0.000681303	0.00617736
ENSG00000140632.17	chr16	-	3	7.43587	0.000694896	0.00627061
ENSG00000136521.13	chr3	+	2	11.7612	0.000722006	0.00648437
ENSG00000140105.18	chr14	-	2	11.7429	0.000729159	0.00651772
ENSG00000179583.20	chr16	+	4	5.72774	0.00075121	0.0066833
ENSG00000261371.6	chr17	-	2	11.5865	0.000789325	0.00698958
ENSG00000130600.19	chr11	-	3	7.2848	0.000802974	0.00707738
ENSG00000146083.12	chr5	-	2	11.4721	0.000836804	0.0073414
ENSG00000145779.8	chr5	+	2	11.2416	0.000942312	0.00822895
ENSG00000137936.18	chr1	-	2	11.2171	0.000953494	0.00825481
ENSG00000138085.17	chr2	+	2	11.2161	0.000953986	0.00825481
ENSG00000106263.18	chr7	+	2	11.1171	0.00100362	0.0086448
ENSG00000068024.17	chr2	-	3	7.0308	0.00102421	0.00878223
ENSG00000186184.19	chr13	+	2	11.0152	0.0010575	0.00902688
ENSG00000184752.13	chr12	-	2	10.9534	0.00109164	0.00927646
ENSG00000108669.16	chr17	-	3	6.93488	0.0011229	0.00949953
ENSG00000172380.6	chr1	-	2	10.8717	0.00113849	0.00958857
ENSG00000004776.13	chr19	-	2	10.8471	0.00115343	0.00967142
ENSG00000173221.14	chr5	-	2	10.8101	0.00117515	0.00975689
ENSG00000182732.18	chr14	+	2	10.8054	0.00117793	0.00975689
ENSG00000149273.15	chr11	+	2	10.8036	0.00117906	0.00975689
ENSG00000123349.15	chr12	+	2	10.7337	0.00122227	0.0100704
ENSG00000129657.16	chr17	+	3	6.82423	0.00124869	0.0102435
ENSG00000122406.14	chr1	+	2	10.6614	0.00126867	0.0103627
ENSG00000163681.16	chr3	+	4	5.3406	0.00127525	0.0103717
ENSG00000073670.14	chr17	+	2	10.6322	0.00128791	0.0104298
ENSG00000171714.12	chr11	+	2	10.5949	0.00131288	0.0105868
ENSG00000176978.14	chr9	-	2	10.573	0.00132781	0.0106618
ENSG00000080189.15	chr20	-	2	10.4755	0.00139632	0.0111647
ENSG00000162819.12	chr1	+	2	10.4573	0.0014095	0.0112004
ENSG00000119729.12	chr2	+	3	6.68357	0.00142929	0.0112004
ENSG00000136560.14	chr2	+	2	10.4297	0.0014298	0.0112004
ENSG00000185437.14	chr21	+	3	6.68253	0.00143071	0.0112004
ENSG00000186716.21	chr22	+	2	10.4258	0.00143262	0.0112004
ENSG00000092841.19	chr12	+	2	10.4148	0.00144081	0.0112004
ENSG00000165929.13	chr14	-	2	10.413	0.00144216	0.0112004
ENSG00000141552.18	chr17	+	2	10.4014	0.00145083	0.0112217
ENSG00000101557.15	chr18	+	2	10.3201	0.00151309	0.0116557
ENSG00000170348.9	chr14	-	2	10.2488	0.00156996	0.0120428
ENSG00000185787.15	chr15	+	2	10.2414	0.00157605	0.0120428
ENSG00000173272.16	chr2	-	2	10.1292	0.00167064	0.0127143
ENSG00000108107.15	chr19	+	2	10.1136	0.00168388	0.0127638
ENSG00000228300.14	chr19	+	2	10.017	0.0017704	0.0133662
ENSG00000126970.16	chrX	-	2	9.89252	0.00188869	0.0142026
ENSG00000127946.17	chr7	-	2	9.88462	0.00189646	0.0142047
ENSG00000132405.19	chr4	+	2	9.87225	0.00190869	0.0142401
ENSG00000145730.20	chr5	+	6	3.84829	0.00191796	0.0142531
ENSG00000162616.9	chr1	+	2	9.83704	0.00194397	0.0143319
ENSG00000134321.13	chr2	+	2	9.82374	0.00195834	0.0143319
ENSG00000185236.12	chr19	+	2	9.81795	0.00196336	0.0143319
ENSG00000119917.15	chr10	+	2	9.81753	0.00196514	0.0143319
ENSG00000133401.16	chr5	+	2	9.8094	0.00197212	0.0143319
ENSG00000150764.14	chr11	+	3	6.34784	0.00197395	0.0143319
ENSG00000063177.13	chr19	-	2	9.79918	0.00198263	0.01434
ENSG00000143951.16	chr2	-	3	6.3106	0.00204641	0.0147451
ENSG00000196531.14	chr12	-	3	6.29437	0.00207823	0.0149176
ENSG00000109572.14	chr4	+	2	9.68161	0.00210779	0.0150727
ENSG00000110321.19	chr11	-	6	3.76673	0.00227345	0.0161962
ENSG00000150093.20	chr10	-	2	9.49908	0.00231833	0.0164541
ENSG00000115594.12	chr2	+	3	6.15612	0.00237474	0.0167915
ENSG00000126457.22	chr19	+	3	6.0883	0.00253467	0.0178558
ENSG00000213145.10	chr14	+	2	9.31601	0.00255116	0.0179054
ENSG00000087074.8	chr19	+	2	9.28632	0.00259111	0.0181033
ENSG00000177098.9	chr11	-	2	9.28091	0.00259846	0.0181033
ENSG00000176046.9	chr16	-	2	9.23584	0.00266052	0.0183704
ENSG00000178188.14	chr16	+	2	9.23537	0.00266117	0.0183704
ENSG00000178980.15	chr19	+	2	9.23199	0.00266589	0.0183704
ENSG00000145675.15	chr5	+	5	4.10515	0.00275469	0.0188104
ENSG00000151247.13	chr4	-	2	9.16924	0.00275502	0.0188104
ENSG00000197702.14	chr11	+	3	6.00017	0.00275952	0.0188104
ENSG00000049759.20	chr18	+	2	9.1295	0.00281307	0.0191067
ENSG00000134590.14	chrX	+	2	9.09265	0.00286795	0.0194099
ENSG00000166444.19	chr11	-	3	5.95469	0.00288329	0.0194442
ENSG00000120071.15	chr17	-	2	9.02637	0.0029696	0.0199553
ENSG00000113578.18	chr5	-	2	9.00955	0.00299586	0.0199969
ENSG00000093072.18	chr22	-	2	9.00896	0.0029969	0.0199969
ENSG00000067208.14	chr1	-	2	8.97309	0.00305381	0.0202527
ENSG00000111639.8	chr12	-	2	8.97134	0.0030566	0.0202527
ENSG00000050165.18	chr11	-	3	5.87569	0.00311253	0.0204322
ENSG00000226742.4	chr18	+	2	8.93666	0.00311284	0.0204322
ENSG00000082458.12	chrX	+	3	5.87072	0.00312667	0.0204322
ENSG00000008853.17	chr8	+	3	5.87067	0.00312683	0.0204322
ENSG00000167792.13	chr11	+	3	5.84597	0.0032023	0.0208535
ENSG00000160014.17	chr19	+	2	8.8538	0.00325154	0.0211016
ENSG00000156298.13	chrX	+	2	8.84091	0.00327368	0.0211727
ENSG00000135926.15	chr2	-	4	4.64478	0.00329501	0.0212383
ENSG00000126226.22	chr13	-	2	8.81419	0.00332007	0.0213272
ENSG00000115685.15	chr2	+	2	8.76591	0.00340558	0.0218026
ENSG00000111961.18	chr6	+	3	5.77567	0.00342724	0.0218674
ENSG00000128595.17	chr7	+	2	8.73273	0.00346567	0.0220384
ENSG00000196419.13	chr22	+	2	8.72273	0.00348399	0.0220808
ENSG00000166326.7	chr11	+	2	8.66798	0.00358607	0.022652
ENSG00000080824.19	chr14	-	4	4.57907	0.00360345	0.0226861
ENSG00000135486.19	chr12	+	2	8.62776	0.00366302	0.0229848
ENSG00000107669.18	chr10	-	2	8.59781	0.00372141	0.0232742
ENSG00000140718.21	chr16	+	2	8.53071	0.00385571	0.0240348
ENSG00000254772.10	chr11	-	2	8.40666	0.00411726	0.025581
ENSG00000160972.9	chr8	+	2	8.40022	0.00413132	0.0255845
ENSG00000135241.17	chr7	-	2	8.33486	0.00427688	0.0263179
ENSG00000185650.10	chr14	-	2	8.33458	0.00427753	0.0263179
ENSG00000175287.19	chr9	+	2	8.32837	0.00429163	0.0263192
ENSG00000114923.17	chr2	+	4	4.44777	0.00430833	0.0263364
ENSG00000078808.19	chr1	-	2	8.30411	0.00434719	0.0264885
ENSG00000114861.23	chr3	-	5	3.81033	0.00458184	0.0277921
ENSG00000106333.13	chr7	+	3	5.47339	0.00459047	0.0277921
ENSG00000161203.13	chr3	+	2	8.17118	0.00466497	0.0281532
ENSG00000159842.15	chr17	-	5	3.78233	0.0048079	0.028894
ENSG00000128563.13	chr7	+	2	8.11038	0.0048182	0.028894
ENSG00000160710.18	chr1	-	2	8.09423	0.00485975	0.0289816
ENSG00000162595.7	chr1	-	2	8.09373	0.0048634	0.0289816
ENSG00000143774.17	chr1	+	3	5.4054	0.00490268	0.0291241
ENSG00000138674.17	chr4	-	2	8.05728	0.00495623	0.0293502
ENSG00000072210.19	chr17	+	2	8.0193	0.00505744	0.0298562
ENSG00000163347.6	chr3	-	2	8.00318	0.00510104	0.0300201
ENSG00000087460.28	chr20	+	5	3.73408	0.00522347	0.0306454
ENSG00000108848.16	chr17	+	3	5.3347	0.00525001	0.0307061
ENSG00000167244.21	chr11	-	4	4.29646	0.00529214	0.0308573
ENSG00000079819.19	chr6	-	2	7.91327	0.00535139	0.031107
ENSG00000130522.6	chr19	-	2	7.89269	0.00541068	0.0313555
ENSG00000148120.17	chr9	+	3	5.29751	0.00544257	0.0314441
ENSG00000177354.12	chr10	+	2	7.85746	0.00551311	0.0316795
ENSG00000111678.11	chr12	+	2	7.8485	0.00553956	0.0316795
ENSG00000099260.11	chr1	+	2	7.84277	0.00555652	0.0316795
ENSG00000100106.22	chr22	+	2	7.8426	0.00555702	0.0316795
ENSG00000172037.14	chr3	-	2	7.83927	0.0055669	0.0316795
ENSG00000120549.18	chr10	+	2	7.81993	0.0056247	0.0318359
ENSG00000115365.12	chr2	-	2	7.81883	0.00562799	0.0318359
ENSG00000136758.19	chr10	-	2	7.80629	0.00566581	0.0319545
ENSG00000022267.19	chrX	+	5	3.68453	0.00568755	0.0319819
ENSG00000113441.16	chr5	+	2	7.73379	0.00588963	0.0329567
ENSG00000077782.21	chr8	-	2	7.73187	0.00589568	0.0329567
ENSG00000177380.14	chr19	+	2	7.71509	0.00594883	0.033156
ENSG00000107816.17	chr10	+	2	7.63949	0.00619443	0.0344236
ENSG00000197111.16	chr12	+	3	5.1606	0.0062147	0.0344353
ENSG00000115641.19	chr2	-	3	5.14998	0.00628086	0.0347004
ENSG00000183023.18	chr2	-	3	5.11274	0.00650988	0.0358611
ENSG00000174891.13	chr3	+	2	7.50162	0.00666957	0.0366343
ENSG00000093167.18	chr3	-	2	7.46199	0.00681295	0.0372545
ENSG00000146540.15	chr7	-	3	5.06448	0.00682181	0.0372545
ENSG00000182551.14	chr2	-	2	7.45109	0.00685294	0.0372701
ENSG00000128567.17	chr7	-	2	7.44809	0.00686399	0.0372701
ENSG00000165810.17	chr5	+	3	5.04981	0.00691961	0.0374611
ENSG00000137843.12	chr15	+	2	7.42794	0.00693871	0.0374611
ENSG00000170871.12	chr4	+	2	7.39271	0.00707133	0.0380687
ENSG00000136143.16	chr13	-	2	7.36	0.00719678	0.0386343
ENSG00000205542.11	chrX	+	2	7.32519	0.00733282	0.0392441
ENSG00000258289.9	chr14	+	2	7.32039	0.0073518	0.0392441
ENSG00000047849.21	chr3	-	4	4.04763	0.00741795	0.039486
ENSG00000136108.15	chr13	+	2	7.27613	0.00752907	0.0399652
ENSG00000126217.21	chr13	+	2	7.21774	0.00776972	0.0411274
ENSG00000064205.11	chr20	+	2	7.17292	0.00796293	0.041919
ENSG00000133943.21	chr14	+	2	7.16766	0.00798241	0.041919
ENSG00000063244.13	chr19	+	2	7.16692	0.00798562	0.041919
ENSG00000144560.15	chr3	-	4	3.97196	0.00821886	0.0430241
ENSG00000180879.14	chrX	+	2	7.07612	0.00838688	0.0437827
ENSG00000198668.13	chr14	+	2	7.04993	0.00850644	0.0442849
ENSG00000170142.12	chr3	+	2	7.01005	0.00869186	0.0451262
ENSG00000147862.17	chr9	-	2	7.00407	0.00872002	0.0451487
ENSG00000109171.15	chr4	+	2	6.99329	0.00877103	0.0452891
ENSG00000129084.18	chr11	-	2	6.96687	0.00889739	0.045753
ENSG00000185033.14	chr15	+	2	6.96443	0.00890916	0.045753
ENSG00000119314.16	chr9	-	2	6.95045	0.00897683	0.0459759
ENSG00000099991.18	chr22	+	2	6.94443	0.00900612	0.0460016
ENSG00000180628.15	chr10	+	2	6.93561	0.00904928	0.0460978
ENSG00000071127.17	chr4	-	3	4.74029	0.00934532	0.0474782
ENSG00000144802.11	chr3	+	2	6.85233	0.00946827	0.0479743
ENSG00000109381.20	chr4	-	2	6.81303	0.0096712	0.0488136
ENSG00000174282.12	chr17	-	2	6.81032	0.00968544	0.0488136
ENSG00000143322.21	chr1	-	2	6.79749	0.00975433	0.0489093
ENSG00000231721.7	chr7	-	2	6.79694	0.00975606	0.0489093
ENSG00000284969.1	chr11	-	2	6.78155	0.00983793	0.0491433
ENSG00000235109.7	chr6	-	2	6.77843	0.00985459	0.0491433
ENSG00000189403.15	chr13	-	4	3.83377	0.00990917	0.0492858
ENSG00000144476.6	chr2	+	2	6.72846	0.0101258	0.0502316
ENSG00000101413.12	chr20	+	3	4.64162	0.0102861	0.0508288
ENSG00000135631.17	chr2	-	2	6.69712	0.0102999	0.0508288
ENSG00000162591.16	chr1	-	2	6.6567	0.0105289	0.0518242
ENSG00000152700.14	chr5	-	2	6.58983	0.0109195	0.0536076
ENSG00000108821.14	chr17	-	6	2.99265	0.0111269	0.0544846
ENSG00000125730.17	chr19	-	2	6.53456	0.0112536	0.0549629
ENSG00000083857.14	chr4	-	2	6.52053	0.0113401	0.0551311
ENSG00000103091.15	chr16	-	2	6.51954	0.0113462	0.0551311
ENSG00000139842.15	chr13	+	2	6.51353	0.0113835	0.0551708
ENSG00000198964.14	chr10	-	2	6.48338	0.0115724	0.0559433
ENSG00000100243.21	chr22	-	2	6.44058	0.0118462	0.0571211
ENSG00000204681.11	chr6	-	2	6.3748	0.0122802	0.0590632
ENSG00000185010.15	chrX	-	2	6.34954	0.0124512	0.0597157
ENSG00000187720.14	chr15	+	2	6.34548	0.0124788	0.0597157
ENSG00000124380.11	chr2	+	2	6.33395	0.0125579	0.0599126
ENSG00000198563.14	chr6	-	2	6.33027	0.0125832	0.0599126
ENSG00000170473.17	chr12	-	2	6.31536	0.0126865	0.0602527
ENSG00000165868.16	chr10	-	2	6.30574	0.0127535	0.0604195
ENSG00000101752.12	chr18	+	3	4.41077	0.0128768	0.0608516
ENSG00000187079.20	chr11	+	2	6.28323	0.0129118	0.0608655
ENSG00000126709.16	chr1	-	2	6.2669	0.013028	0.0612605
ENSG00000117859.19	chr1	+	2	6.22347	0.013342	0.062581
ENSG00000172638.13	chr11	-	3	4.37181	0.0133748	0.062581
ENSG00000198626.17	chr1	+	3	4.36216	0.0135011	0.0629057
ENSG00000132153.15	chr3	+	2	6.20061	0.0135106	0.0629057
ENSG00000010282.15	chr3	-	2	6.17874	0.0136741	0.0635109
ENSG00000058056.10	chr3	+	3	4.3263	0.0139811	0.0647778
ENSG00000143420.19	chr1	-	2	6.11329	0.0141748	0.065515
ENSG00000130175.10	chr19	+	2	6.08302	0.0144129	0.066324
ENSG00000164708.6	chr7	-	2	6.08245	0.0144198	0.066324
ENSG00000120333.4	chr1	-	2	6.03668	0.0147854	0.0677225
ENSG00000120885.22	chr8	-	2	6.03546	0.0147953	0.0677225
ENSG00000177000.13	chr1	-	4	3.52597	0.0150136	0.0685559
ENSG00000133142.18	chrX	+	2	5.99911	0.0150948	0.068761
ENSG00000068831.19	chr11	-	3	4.24092	0.015194	0.0690469
ENSG00000156709.15	chrX	-	3	4.23212	0.0153248	0.069475
ENSG00000102024.18	chrX	+	2	5.95417	0.0154736	0.0699822
ENSG00000196313.11	chr7	+	2	5.91029	0.0158532	0.0711828
ENSG00000151726.15	chr4	-	3	4.19725	0.0158559	0.0711828
ENSG00000167685.15	chr19	+	2	5.90789	0.0158742	0.0711828
ENSG00000115414.21	chr2	-	5	3.08024	0.0158894	0.0711828
ENSG00000141013.17	chr16	+	2	5.89576	0.0159809	0.0714241
ENSG00000136205.17	chr7	-	3	4.17648	0.0161792	0.07214
ENSG00000011451.21	chr19	-	3	4.16451	0.0163691	0.0728156
ENSG00000144596.13	chr3	-	2	5.8389	0.0164913	0.0730193
ENSG00000100364.19	chr22	-	2	5.83883	0.016492	0.0730193
ENSG00000158856.18	chr8	+	4	3.45389	0.0165436	0.0730771
ENSG00000198125.13	chr22	-	5	3.05413	0.0166022	0.0731655
ENSG00000100266.19	chr22	-	2	5.81606	0.0167011	0.0734305
ENSG00000080854.16	chr11	-	2	5.79525	0.0168947	0.0741097
ENSG00000188176.12	chr17	+	2	5.78443	0.0169962	0.0743829
ENSG00000205133.12	chr8	-	2	5.76597	0.0171709	0.0749744
ENSG00000262660.1	chr17	+	2	5.75836	0.0172435	0.0751182
ENSG00000105568.18	chr19	+	2	5.75091	0.0173148	0.0752559
ENSG00000204267.16	chr6	-	2	5.72118	0.0176026	0.0763318
ENSG00000131196.18	chr18	+	2	5.70476	0.0177641	0.0766958
ENSG00000122367.20	chr10	+	2	5.70438	0.0177675	0.0766958
ENSG00000141736.14	chr17	+	2	5.69984	0.0178123	0.0767143
ENSG00000108654.16	chr17	-	4	3.39177	0.0179853	0.0772837
ENSG00000100354.21	chr22	+	2	5.67223	0.0180875	0.077547
ENSG00000162772.17	chr1	+	3	4.02062	0.018836	0.080574
ENSG00000187514.17	chr2	+	2	5.59008	0.0189325	0.0807779
ENSG00000111077.18	chr12	+	3	4.01342	0.018969	0.0807779
ENSG00000185088.14	chr15	-	2	5.57135	0.0191308	0.0812844
ENSG00000157600.12	chrX	+	2	5.56241	0.0192263	0.0815073
ENSG00000198157.11	chrX	-	2	5.54395	0.0194249	0.0821657
ENSG00000088899.15	chr20	-	2	5.53711	0.0194991	0.0822702
ENSG00000147408.14	chr8	-	3	3.98322	0.0195365	0.0822702
ENSG00000106682.16	chr7	+	2	5.49805	0.0199281	0.0837335
ENSG00000119403.15	chr9	-	2	5.4831	0.020095	0.0840491
ENSG00000002933.9	chr7	+	2	5.48166	0.0201112	0.0840491
ENSG00000124749.17	chr6	-	2	5.47945	0.0201363	0.0840491
ENSG00000268858.2	chr20	-	2	5.47508	0.0201851	0.0840675
ENSG00000204257.15	chr6	-	2	5.42473	0.0207621	0.0862201
ENSG00000204922.5	chr11	+	2	5.42193	0.0207929	0.0862201
ENSG00000137496.18	chr11	+	2	5.40656	0.0209722	0.0865604
ENSG00000156113.24	chr10	-	2	5.40085	0.0210392	0.0865604
ENSG00000159348.13	chr1	-	2	5.40081	0.0210397	0.0865604
ENSG00000051620.11	chr6	+	2	5.39928	0.0210577	0.0865604
ENSG00000129422.14	chr8	-	3	3.90172	0.0211546	0.0867706
ENSG00000090621.15	chr1	-	2	5.37399	0.0213575	0.0874135
ENSG00000117114.20	chr1	+	3	3.88447	0.0215141	0.0877911
ENSG00000137449.17	chr4	+	2	5.35858	0.0215424	0.0877911
ENSG00000122390.19	chr16	+	2	5.34894	0.0216588	0.0880761
ENSG00000168488.18	chr16	+	2	5.32482	0.0219533	0.0890823
ENSG00000058668.15	chr1	+	2	5.31246	0.0221057	0.0894332
ENSG00000108852.15	chr17	-	2	5.30972	0.0221396	0.0894332
ENSG00000175550.8	chr11	+	2	5.30636	0.0221813	0.0894332
ENSG00000184009.13	chr17	-	2	5.29272	0.0223515	0.0899278
ENSG00000239523.6	chr3	+	2	5.28709	0.0224221	0.0900209
ENSG00000140403.12	chr15	+	2	5.27746	0.0225459	0.0903266
ENSG00000184840.12	chr5	+	2	5.26848	0.0226573	0.0905812
ENSG00000106246.18	chr7	-	2	5.26167	0.0227439	0.0906032
ENSG00000179950.14	chr8	-	2	5.26054	0.0227584	0.0906032
ENSG00000184113.9	chr22	-	2	5.2501	0.022892	0.0907456
ENSG00000013563.14	chrX	-	2	5.24977	0.0228962	0.0907456
ENSG00000143337.19	chr1	+	2	5.24653	0.0229378	0.0907456
ENSG00000169398.19	chr8	-	2	5.24107	0.0230082	0.0908345
ENSG00000131446.17	chr5	-	4	3.20088	0.0232374	0.0915486
ENSG00000139132.15	chr12	+	4	3.19575	0.0233976	0.0919884
ENSG00000089159.17	chr12	-	2	5.19639	0.0235925	0.0923955
ENSG00000108219.15	chr10	+	2	5.19593	0.0235986	0.0923955
ENSG00000225663.8	chr17	-	2	5.17979	0.0238136	0.0930451
ENSG00000198624.13	chr5	-	2	5.17433	0.0238867	0.0931386
ENSG00000105321.14	chr19	+	2	5.15089	0.0242036	0.0941804
ENSG00000105643.10	chr19	+	3	3.76103	0.024272	0.094253
ENSG00000112992.18	chr5	+	2	5.13865	0.0243707	0.0944098
ENSG00000077157.22	chr1	+	2	5.13281	0.0244509	0.0944098
ENSG00000008256.16	chr7	-	2	5.13202	0.0244618	0.0944098
ENSG00000106052.13	chr7	+	2	5.12247	0.0245936	0.0947254
ENSG00000164733.22	chr8	-	3	3.74109	0.0247498	0.0951337
ENSG00000116667.15	chr1	+	2	5.10505	0.0248359	0.0952712
ENSG00000075711.21	chr3	-	2	5.10028	0.0249027	0.0953344
ENSG00000075413.19	chr14	+	2	5.08177	0.0251638	0.096046
ENSG00000166140.17	chr15	+	2	5.07992	0.0251899	0.096046
ENSG00000076242.16	chr3	+	2	5.06739	0.0253683	0.0963648
ENSG00000117984.15	chr11	-	2	5.06598	0.0253885	0.0963648
ENSG00000050820.17	chr16	-	3	3.7102	0.0255087	0.0963648
ENSG00000128585.18	chr7	+	2	5.05385	0.0255626	0.0963648
ENSG00000171444.18	chr5	-	3	3.70763	0.0255731	0.0963648
ENSG00000101276.18	chr20	-	2	5.05274	0.0255786	0.0963648
ENSG00000120278.16	chr6	+	2	5.03834	0.0257871	0.0969576
ENSG00000124440.16	chr19	+	3	3.68938	0.0260335	0.0976902
ENSG00000282221.1	chr1	+	2	4.98197	0.0266208	0.099635
ENSG00000107771.17	chr10	+	2	4.97956	0.026657	0.099635
ENSG00000182093.16	chr21	+	2	4.96987	0.0268033	0.0996971
ENSG00000135821.19	chr1	-	2	4.96923	0.0268131	0.0996971
ENSG00000100284.22	chr22	+	2	4.96802	0.0268314	0.0996971
ENSG00000101871.16	chrX	-	2	4.9583	0.0269791	0.10005
ENSG00000043143.21	chr5	+	3	3.64425	0.0272082	0.100702
ENSG00000117399.14	chr1	+	2	4.93312	0.0273659	0.101088
ENSG00000185624.16	chr17	-	3	3.6307	0.0275713	0.10155
ENSG00000101940.18	chrX	+	2	4.91327	0.027675	0.10155
ENSG00000095787.24	chr10	+	2	4.90806	0.0277566	0.10155
ENSG00000258315.5	chr17	+	2	4.90726	0.0277693	0.10155
ENSG00000167978.17	chr16	+	4	3.06754	0.0277768	0.10155
ENSG00000164741.15	chr8	-	3	3.62181	0.0278123	0.10155
ENSG00000179010.15	chr4	+	2	4.86041	0.0285159	0.103918
ENSG00000053747.17	chr18	+	2	4.84369	0.0287873	0.104609
ENSG00000196405.13	chr14	+	3	3.58558	0.0288159	0.104609
ENSG00000108515.18	chr17	+	2	4.79521	0.0295903	0.107011
ENSG00000162734.13	chr1	+	2	4.79518	0.0295905	0.107011
ENSG00000178209.16	chr8	-	7	2.33901	0.0302915	0.109338
ENSG00000149557.14	chr11	-	4	2.99539	0.0305861	0.110191
ENSG00000198160.15	chr1	+	2	4.73308	0.0306533	0.110224
ENSG00000285938.1	chr3	+	2	4.70298	0.0311854	0.111925
ENSG00000136699.20	chr2	-	2	4.69862	0.0312602	0.111981
ENSG00000166206.15	chr15	-	2	4.6896	0.031427	0.112366
ENSG00000163399.16	chr1	+	2	4.68419	0.0315181	0.112421
ENSG00000148180.21	chr9	+	6	2.46686	0.0315608	0.112421
ENSG00000134686.18	chr1	-	2	4.67461	0.0316905	0.112485
ENSG00000136895.19	chr9	+	2	4.67421	0.0316977	0.112485
ENSG00000124535.16	chr6	+	2	4.64349	0.0322575	0.114258
ENSG00000153250.20	chr2	-	3	3.45502	0.0327444	0.115766
ENSG00000135316.19	chr6	-	2	4.58763	0.0333024	0.117519
ENSG00000163072.16	chr2	+	2	4.57083	0.0336235	0.118432
ENSG00000173486.14	chr11	+	2	4.56611	0.0337143	0.118532
ENSG00000105373.19	chr19	+	3	3.41878	0.0339274	0.119042
ENSG00000144524.18	chr2	+	2	4.55212	0.0339851	0.119042
ENSG00000166913.13	chr20	+	2	4.54175	0.0341872	0.119529
ENSG00000008056.14	chrX	-	2	4.52086	0.0345981	0.120478
ENSG00000146729.10	chr7	+	2	4.51941	0.0346268	0.120478
ENSG00000181666.18	chr19	+	2	4.51529	0.0347086	0.120478
ENSG00000127603.30	chr1	+	8	2.17011	0.034713	0.120478
ENSG00000133067.18	chr1	+	3	3.3849	0.0350725	0.121471
ENSG00000159592.11	chr1	-	3	3.3833	0.0351273	0.121471
ENSG00000018189.13	chr4	+	2	4.49116	0.0351915	0.121471
ENSG00000204084.13	chr1	-	2	4.43404	0.036363	0.125287
ENSG00000213465.8	chr11	+	2	4.41613	0.0367387	0.126352
ENSG00000246273.8	chr11	+	2	4.40198	0.0370385	0.127152
ENSG00000198728.11	chr10	-	2	4.38142	0.0374784	0.12843
ENSG00000226306.6	chr5	+	2	4.37367	0.0376459	0.128771
ENSG00000092871.17	chr17	-	2	4.3672	0.0377862	0.129018
ENSG00000178149.17	chr3	-	2	4.35767	0.0379939	0.129494
ENSG00000168542.16	chr2	+	2	4.35196	0.0381245	0.129705
ENSG00000164107.9	chr4	-	3	3.29345	0.0383607	0.130275
ENSG00000073910.23	chr13	+	5	2.54813	0.0385131	0.130559
ENSG00000161013.17	chr5	-	2	4.30481	0.0391679	0.132541
ENSG00000170989.10	chr1	+	2	4.29926	0.0392932	0.132728
ENSG00000173960.14	chr2	+	2	4.27092	0.0399406	0.134675
ENSG00000162241.12	chr11	-	2	4.26576	0.0400595	0.134682
ENSG00000134775.15	chr18	+	2	4.26467	0.0400849	0.134682
ENSG00000124942.14	chr11	-	3	3.24509	0.0402235	0.134909
ENSG00000182154.8	chr9	+	2	4.23803	0.0407059	0.136285
ENSG00000177885.15	chr17	-	2	4.23282	0.0408286	0.136455
ENSG00000172819.17	chr12	-	3	3.21625	0.0413773	0.138046
ENSG00000110031.13	chr11	-	2	4.19092	0.0418293	0.139308
ENSG00000142937.12	chr1	+	2	4.1844	0.0419873	0.139499
ENSG00000106631.8	chr7	-	2	4.18276	0.0420339	0.139499
ENSG00000142541.18	chr19	+	2	4.17237	0.0422807	0.139952
ENSG00000113140.11	chr5	-	2	4.17085	0.0423178	0.139952
ENSG00000142599.19	chr1	-	6	2.31306	0.0424884	0.140271
ENSG00000116922.14	chr1	-	2	4.16011	0.0425819	0.140272
ENSG00000117707.16	chr1	+	3	3.18567	0.0426368	0.140272
ENSG00000225377.6	chr20	-	2	4.14696	0.0429072	0.140772
ENSG00000203709.12	chr1	-	2	4.14575	0.0429373	0.140772
ENSG00000115310.18	chr2	-	3	3.16461	0.043527	0.142406
ENSG00000128641.19	chr2	+	2	4.11809	0.0436313	0.142406
ENSG00000061938.20	chr3	-	2	4.11702	0.0436613	0.142406
ENSG00000187498.16	chr13	-	2	4.10451	0.0439762	0.14304
ENSG00000137801.11	chr15	+	2	4.10083	0.0440759	0.14304
ENSG00000196588.20	chr22	-	2	4.0989	0.0441195	0.14304
ENSG00000205581.11	chr21	-	2	4.09741	0.0441576	0.14304
ENSG00000149115.14	chr11	-	3	3.14275	0.0444704	0.143727
ENSG00000080546.13	chr6	-	2	4.08328	0.0445214	0.143727
ENSG00000138757.15	chr4	-	2	4.07676	0.0446902	0.144027
ENSG00000102967.12	chr16	+	2	4.07098	0.044844	0.144277
ENSG00000204520.14	chr6	+	2	4.06616	0.044966	0.144412
ENSG00000087008.16	chr4	-	2	4.0634	0.0450381	0.144412
ENSG00000204843.13	chr2	-	3	3.1269	0.0451675	0.144582
ENSG00000132938.22	chr13	+	2	4.05185	0.0453415	0.144799
ENSG00000167815.12	chr19	-	2	4.05008	0.0453882	0.144799
ENSG00000182957.16	chr13	+	2	4.03875	0.045688	0.145448
ENSG00000278311.5	chr17	+	2	4.0366	0.0457451	0.145448
ENSG00000134201.12	chr1	+	2	4.03193	0.0458696	0.145599
ENSG00000048052.23	chr7	+	4	2.6858	0.0461628	0.146238
ENSG00000167797.8	chr11	-	2	4.01499	0.0463239	0.146238
ENSG00000118046.16	chr19	+	2	4.01436	0.0463409	0.146238
ENSG00000124422.12	chr17	-	2	4.01091	0.0464339	0.146238
ENSG00000166278.15	chr6	+	2	4.00823	0.0465064	0.146238
ENSG00000182534.13	chr17	-	3	3.09653	0.0465339	0.146238
ENSG00000073711.11	chr3	+	2	4.00093	0.0467045	0.14636
ENSG00000145703.16	chr5	+	2	4.0001	0.0467271	0.14636
ENSG00000143179.16	chr1	+	2	3.99574	0.046846	0.14649
ENSG00000148396.18	chr9	-	2	3.98844	0.0470456	0.146872
ENSG00000173801.17	chr17	-	2	3.97384	0.0474475	0.147788
ENSG00000122550.18	chr7	+	2	3.97133	0.0475167	0.147788
ENSG00000164713.10	chr7	+	3	3.07249	0.0476449	0.147788
ENSG00000114738.11	chr3	+	2	3.9665	0.0476509	0.147788
ENSG00000160408.15	chr9	-	2	3.95373	0.0480068	0.148649
ENSG00000183044.12	chr16	+	2	3.93209	0.0486173	0.150293
ENSG00000048707.15	chr1	+	2	3.92451	0.0488324	0.150712
ENSG00000169925.17	chr9	-	2	3.9023	0.0494701	0.152432
ENSG00000077684.16	chr4	+	2	3.89352	0.0497245	0.152732
ENSG00000122359.18	chr10	-	2	3.89338	0.0497286	0.152732
ENSG00000247271.7	chr11	+	2	3.88711	0.0499114	0.153045
ENSG00000179094.16	chr17	-	2	3.88411	0.0499988	0.153066
ENSG00000104635.15	chr8	+	2	3.8655	0.0505461	0.153942
ENSG00000123358.20	chr12	+	3	3.01221	0.0505549	0.153942
ENSG00000008130.15	chr1	-	2	3.86454	0.0505744	0.153942
ENSG00000103316.12	chr16	-	2	3.86342	0.0506101	0.153942
ENSG00000074181.9	chr19	-	2	3.85579	0.0508341	0.154376
ENSG00000126883.17	chr9	+	2	3.8474	0.0510844	0.154888
ENSG00000147403.18	chrX	+	2	3.84165	0.0512567	0.155162
ENSG00000198959.12	chr20	-	2	3.82953	0.0516219	0.156018
ENSG00000075131.10	chr15	-	2	3.82621	0.0517225	0.156073
ENSG00000115461.5	chr2	-	2	3.81342	0.0521118	0.156998
ENSG00000196136.18	chr14	+	2	3.80597	0.0523469	0.157456
ENSG00000119950.21	chr10	+	3	2.96883	0.0527494	0.158416
ENSG00000108622.11	chr17	-	2	3.76844	0.0535056	0.160432
ENSG00000157514.16	chrX	-	2	3.7566	0.0538791	0.161153
ENSG00000266094.8	chr1	+	2	3.75283	0.0539985	0.161153
ENSG00000143198.13	chr1	+	3	2.94496	0.0540011	0.161153
ENSG00000055163.20	chr5	+	2	3.74504	0.0542463	0.161519
ENSG00000165269.13	chr9	-	2	3.74353	0.0542943	0.161519
ENSG00000037241.7	chr5	+	2	3.72382	0.0549274	0.162834
ENSG00000138640.15	chr4	-	2	3.72179	0.0549931	0.162834
ENSG00000178951.9	chr19	-	2	3.72176	0.0549939	0.162834
ENSG00000101997.13	chrX	+	2	3.71398	0.0552463	0.163326
ENSG00000092068.20	chr14	-	2	3.71061	0.0553562	0.163396
ENSG00000167766.19	chr19	-	2	3.69657	0.0558157	0.164496
ENSG00000158864.13	chr1	+	2	3.67766	0.0564409	0.16608
ENSG00000168575.10	chr8	-	2	3.67474	0.0565381	0.166108
ENSG00000036672.16	chr11	-	4	2.52838	0.056837	0.166728
ENSG00000259498.1	chr15	-	2	3.63262	0.057961	0.169762
ENSG00000116774.12	chr1	+	2	3.60225	0.0590103	0.172569
ENSG00000162434.13	chr1	-	2	3.59902	0.0591233	0.172573
ENSG00000164091.12	chr3	-	2	3.597	0.0591939	0.172573
ENSG00000114854.8	chr3	-	2	3.58335	0.059674	0.173705
ENSG00000182199.11	chr12	+	3	2.82562	0.0607201	0.176209
ENSG00000125520.14	chr20	+	3	2.82541	0.0607322	0.176209
ENSG00000150991.15	chr12	-	2	3.55142	0.060813	0.176209
ENSG00000198105.16	chr10	-	2	3.54064	0.0612025	0.177067
ENSG00000143321.19	chr1	-	3	2.80697	0.0618437	0.178649
ENSG00000111642.16	chr12	-	3	2.80477	0.0619777	0.178764
ENSG00000166317.12	chr10	-	2	3.51403	0.0621765	0.179065
ENSG00000147255.19	chrX	-	2	3.50928	0.0623518	0.179297
ENSG00000130779.22	chr12	-	2	3.50185	0.0626276	0.179796
ENSG00000244274.8	chr20	+	3	2.79278	0.0627151	0.179796
ENSG00000106070.20	chr7	-	2	3.4948	0.0628905	0.180026
ENSG00000196465.10	chr12	+	2	3.49015	0.0630642	0.180251
ENSG00000072062.15	chr19	-	2	3.48571	0.0632308	0.180455
ENSG00000167460.17	chr19	+	3	2.77888	0.0635759	0.181167
ENSG00000172757.13	chr11	-	2	3.46685	0.0639439	0.181942
ENSG00000196141.14	chr2	+	2	3.44732	0.064691	0.183792
ENSG00000178096.9	chr1	+	2	3.42731	0.0654665	0.185545
ENSG00000219626.9	chr2	+	2	3.42603	0.0655165	0.185545
ENSG00000104824.18	chr19	-	2	3.42385	0.0656018	0.185545
ENSG00000169641.13	chr1	-	2	3.40163	0.0664766	0.187442
ENSG00000163882.9	chr3	+	2	3.39942	0.0665641	0.187442
ENSG00000105223.20	chr19	+	3	2.73076	0.0666565	0.187442
ENSG00000228794.10	chr1	+	2	3.39653	0.0666792	0.187442
ENSG00000132676.16	chr1	+	2	3.39432	0.066767	0.187442
ENSG00000076108.12	chr12	-	2	3.38746	0.0670408	0.187932
ENSG00000186577.14	chr6	-	2	3.37754	0.067439	0.188508
ENSG00000232119.8	chrX	+	2	3.37739	0.0674452	0.188508
ENSG00000130985.17	chrX	+	2	3.344	0.0688045	0.192024
ENSG00000124155.18	chr20	+	3	2.69695	0.0689104	0.192037
ENSG00000121769.8	chr1	-	2	3.33504	0.0691742	0.192489
ENSG00000138326.21	chr10	+	2	3.33131	0.0693285	0.192636
ENSG00000159314.11	chr17	-	3	2.67615	0.070335	0.195146
ENSG00000133818.14	chr11	-	2	3.28858	0.0711261	0.197052
ENSG00000179348.12	chr3	-	2	3.26665	0.0720676	0.199369
ENSG00000138303.18	chr10	-	3	2.63765	0.0730507	0.201535
ENSG00000113645.15	chr5	+	2	3.24381	0.073063	0.201535
ENSG00000184182.19	chr2	+	2	3.23602	0.0734059	0.202023
ENSG00000005022.6	chrX	+	2	3.2336	0.0735127	0.202023
ENSG00000203879.12	chrX	+	2	3.23253	0.07356	0.202023
ENSG00000173175.15	chr3	-	3	2.62813	0.0737384	0.202033
ENSG00000107796.13	chr10	-	2	3.22776	0.0737766	0.202033
ENSG00000116731.22	chr1	+	2	3.22435	0.0739229	0.202141
ENSG00000079459.13	chr8	+	2	3.21494	0.0743423	0.202995
ENSG00000286054.1	chr21	+	2	3.20709	0.0746944	0.203663
ENSG00000111341.10	chr12	-	2	3.20255	0.0749025	0.203937
ENSG00000137075.18	chr9	-	3	2.61003	0.0750634	0.204082
ENSG00000205268.11	chr8	-	2	3.19419	0.0752768	0.204369
ENSG00000136710.10	chr2	-	2	3.19037	0.0754501	0.204492
ENSG00000079999.14	chr19	-	2	3.18698	0.0756047	0.204492
ENSG00000116194.13	chr1	-	2	3.18608	0.0756458	0.204492
ENSG00000090006.18	chr19	+	3	2.5813	0.0772172	0.208443
ENSG00000075785.14	chr3	+	3	2.57924	0.0773737	0.208568
ENSG00000126461.15	chr19	+	2	3.13934	0.077809	0.209443
ENSG00000103043.15	chr16	-	2	3.13611	0.0779609	0.209514
ENSG00000027075.15	chr14	+	2	3.13408	0.0780563	0.209514
ENSG00000110422.12	chr11	+	2	3.12804	0.0783416	0.209982
ENSG00000100196.11	chr22	+	2	3.12175	0.0786402	0.210485
ENSG00000118263.15	chr2	-	2	3.11513	0.0789554	0.21103
ENSG00000185129.8	chr5	+	2	3.10931	0.0792338	0.211273
ENSG00000159840.16	chr7	+	3	2.55466	0.0792693	0.211273
ENSG00000203485.14	chr14	+	2	3.09029	0.0801512	0.213324
ENSG00000155755.19	chr2	-	2	3.08677	0.0803225	0.21348
ENSG00000135404.12	chr12	-	4	2.26279	0.080536	0.213748
ENSG00000166925.9	chr7	-	2	3.06596	0.0813415	0.215166
ENSG00000074964.17	chr1	+	2	3.06584	0.0813477	0.215166
ENSG00000105607.13	chr19	+	2	3.06455	0.081411	0.215166
ENSG00000046653.15	chrX	-	2	3.05927	0.0816723	0.215452
ENSG00000131828.14	chrX	+	2	3.05776	0.0817468	0.215452
ENSG00000038382.20	chr5	+	3	2.51632	0.0823188	0.216659
ENSG00000106823.12	chr9	-	2	3.04106	0.0825797	0.217044
ENSG00000113648.16	chr5	-	2	3.03528	0.0828701	0.217505
ENSG00000012061.16	chr19	-	5	2.06851	0.0836225	0.219176
ENSG00000068305.17	chr15	+	2	3.00555	0.0843809	0.220638
ENSG00000185973.12	chrX	-	2	3.00412	0.0844543	0.220638
ENSG00000067141.17	chr15	+	2	3.00064	0.0846328	0.220638
ENSG00000112183.15	chr6	+	2	3.00039	0.0846459	0.220638
ENSG00000123143.13	chr19	+	2	2.99717	0.0848121	0.220768
ENSG00000072310.17	chr17	-	2	2.97731	0.0858462	0.223084
ENSG00000262879.6	chr17	-	2	2.97552	0.0859372	0.223084
ENSG00000135090.14	chr12	-	2	2.97083	0.0861832	0.223416
ENSG00000123600.20	chr2	-	2	2.96847	0.086307	0.223431
ENSG00000140830.9	chr16	-	2	2.95665	0.0869314	0.224741
ENSG00000239305.7	chr2	-	2	2.9409	0.0877706	0.226328
ENSG00000173848.19	chr10	+	2	2.94039	0.0877977	0.226328
ENSG00000139579.13	chr12	+	2	2.93842	0.0879037	0.226328
ENSG00000100418.8	chr22	-	2	2.93523	0.0880749	0.226461
ENSG00000132205.11	chr18	+	2	2.93266	0.0882131	0.226509
ENSG00000142156.15	chr21	+	2	2.9267	0.0885347	0.227027
ENSG00000112773.16	chr6	-	2	2.9226	0.0887569	0.22729
ENSG00000156265.16	chr21	+	2	2.90387	0.0897867	0.22959
ENSG00000099204.20	chr10	-	5	2.02284	0.0898976	0.22959
ENSG00000117298.16	chr1	-	3	2.42402	0.090155	0.229938
ENSG00000105738.11	chr19	+	2	2.88655	0.0907355	0.23105
ENSG00000068724.17	chr2	+	2	2.88232	0.0909709	0.23105
ENSG00000068308.14	chrX	-	2	2.88045	0.0910753	0.23105
ENSG00000182149.21	chr16	+	2	2.88038	0.0910789	0.23105
ENSG00000079308.19	chr2	-	9	1.71188	0.0916104	0.232088
ENSG00000175832.13	chr17	-	2	2.86749	0.0918011	0.23226
ENSG00000091428.18	chr2	+	2	2.86375	0.0920116	0.232483
ENSG00000130024.15	chr6	-	2	2.85393	0.0925674	0.233575
ENSG00000176155.19	chr17	-	2	2.84924	0.092834	0.233937
ENSG00000163156.12	chr1	+	2	2.84358	0.0931572	0.23444
ENSG00000153310.19	chr8	-	2	2.83891	0.0934244	0.234541
ENSG00000141759.15	chr18	-	2	2.83855	0.0934453	0.234541
ENSG00000134982.17	chr5	+	2	2.8206	0.0944808	0.236827
ENSG00000072818.12	chr17	+	2	2.81175	0.0949962	0.237804
ENSG00000075240.17	chr22	+	2	2.7955	0.0959509	0.239877
ENSG00000234520.6	chr7	-	2	2.79194	0.0961651	0.240096
ENSG00000269313.5	chrX	+	2	2.78035	0.09685	0.241488
ENSG00000165806.21	chr10	+	2	2.77577	0.0971236	0.241852
ENSG00000234438.5	chr15	+	2	2.76085	0.098021	0.243766
ENSG00000138639.18	chr4	+	2	2.74343	0.0990806	0.246078
ENSG00000214063.11	chr11	+	2	2.73231	0.0997633	0.24745
ENSG00000266173.7	chr17	-	2	2.7212	0.10045	0.248828
ENSG00000117625.14	chr1	+	2	2.70908	0.101206	0.250349
ENSG00000130822.16	chrX	-	2	2.70401	0.101524	0.250349
ENSG00000167701.14	chr8	+	2	2.70403	0.101526	0.250349
ENSG00000106772.18	chr9	-	2	2.70305	0.101593	0.250349
ENSG00000115468.12	chr2	+	2	2.69605	0.102026	0.25109
ENSG00000146112.12	chr6	-	3	2.2959	0.102291	0.251415
ENSG00000278189.1	chr21	+	2	2.67742	0.103218	0.253366
ENSG00000111913.20	chr6	-	2	2.67419	0.103417	0.253526
ENSG00000149187.18	chr11	-	2	2.66179	0.104215	0.255152
ENSG00000174405.14	chr13	-	2	2.64312	0.10543	0.257794
ENSG00000049618.24	chr6	+	2	2.63974	0.105652	0.258004
ENSG00000168237.18	chr3	+	2	2.63046	0.106264	0.259074
ENSG00000131016.17	chr6	+	3	2.25637	0.106364	0.259074
ENSG00000198363.18	chr8	-	3	2.24411	0.107652	0.261639
ENSG00000140939.14	chr16	+	2	2.60898	0.107693	0.261639
ENSG00000065882.16	chr4	+	2	2.60205	0.108159	0.262434
ENSG00000102125.16	chrX	+	2	2.5712	0.11026	0.26719
ENSG00000186111.11	chr19	-	2	2.56795	0.110484	0.267391
ENSG00000105514.8	chr19	-	2	2.56406	0.110752	0.267698
ENSG00000175505.11	chr11	-	2	2.55441	0.111422	0.268159
ENSG00000125818.18	chr20	+	2	2.55366	0.111474	0.268159
ENSG00000091436.17	chr2	+	3	2.20774	0.111585	0.268159
ENSG00000163697.17	chr4	-	3	2.20598	0.111779	0.268159
ENSG00000104967.8	chr19	-	2	2.54917	0.111788	0.268159
ENSG00000137501.17	chr11	-	2	2.54721	0.111924	0.268159
ENSG00000127838.14	chr2	+	3	2.20458	0.111933	0.268159
ENSG00000117528.14	chr1	+	2	2.53993	0.112435	0.269006
ENSG00000179818.14	chr2	-	2	2.538	0.112571	0.269006
ENSG00000082641.16	chr17	+	3	2.1921	0.11332	0.270255
ENSG00000132669.14	chr20	+	4	1.99938	0.113379	0.270255
ENSG00000115963.14	chr2	-	2	2.51852	0.113952	0.270749
ENSG00000105323.17	chr19	+	2	2.5184	0.113961	0.270749
ENSG00000110911.17	chr12	-	2	2.51615	0.114121	0.270749
ENSG00000127022.16	chr5	+	2	2.51565	0.114157	0.270749
ENSG00000164597.15	chr7	-	3	2.18034	0.114643	0.271561
ENSG00000104951.16	chr19	-	2	2.50511	0.114914	0.271862
ENSG00000107959.17	chr10	-	2	2.49538	0.115617	0.273185
ENSG00000156802.13	chr8	-	2	2.49104	0.115933	0.273304
ENSG00000010803.16	chr1	-	2	2.49072	0.115956	0.273304
ENSG00000118900.15	chr16	+	2	2.48804	0.116151	0.273425
ENSG00000137094.15	chr9	+	3	2.16427	0.11648	0.273858
ENSG00000119699.8	chr14	-	2	2.4812	0.116651	0.273921
ENSG00000132466.19	chr4	-	2	2.47444	0.117148	0.274746
ENSG00000089225.20	chr12	-	4	1.97048	0.117686	0.275669
ENSG00000121361.5	chr12	-	2	2.46373	0.117939	0.275918
ENSG00000008710.20	chr16	-	2	2.45622	0.118498	0.276884
ENSG00000167468.18	chr19	+	2	2.44743	0.119155	0.278077
ENSG00000135956.9	chr2	-	2	2.44378	0.119429	0.278373
ENSG00000137074.20	chr9	-	2	2.43822	0.119848	0.279007
ENSG00000110811.20	chr12	+	2	2.43166	0.120344	0.279818
ENSG00000173281.5	chr8	-	2	2.42687	0.120708	0.280321
ENSG00000102804.15	chr13	-	4	1.94953	0.120903	0.280429
ENSG00000158169.13	chr9	-	2	2.41319	0.121754	0.281719
ENSG00000159200.18	chr21	-	2	2.41327	0.121756	0.281719
ENSG00000112419.14	chr6	+	2	2.39571	0.123106	0.284495
ENSG00000114541.15	chr3	-	5	1.82078	0.123355	0.284644
ENSG00000183255.12	chr21	-	2	2.39102	0.123471	0.284644
ENSG00000179632.10	chr8	+	2	2.3857	0.123887	0.284978
ENSG00000100412.17	chr22	+	2	2.38372	0.124042	0.284978
ENSG00000179604.10	chr17	-	2	2.38219	0.124163	0.284978
ENSG00000168675.19	chr18	+	5	1.81628	0.124218	0.284978
ENSG00000026025.16	chr10	+	2	2.37626	0.124629	0.285576
ENSG00000137070.18	chr9	+	2	2.35508	0.126312	0.289084
ENSG00000114993.17	chr2	-	2	2.34781	0.126896	0.29007
ENSG00000172009.15	chr19	+	2	2.34263	0.127313	0.290673
ENSG00000131981.16	chr14	+	3	2.07129	0.127674	0.290807
ENSG00000148700.15	chr10	+	3	2.07125	0.127679	0.290807
ENSG00000185567.7	chr14	-	2	2.32275	0.128931	0.293306
ENSG00000137486.17	chr11	-	2	2.32079	0.129091	0.293319
ENSG00000160111.14	chr19	-	2	2.31088	0.129907	0.294496
ENSG00000111245.17	chr12	-	3	2.05367	0.12992	0.294496
ENSG00000205560.13	chr22	-	2	2.30568	0.130338	0.29509
ENSG00000070404.10	chr19	+	2	2.3006	0.13076	0.295692
ENSG00000105409.19	chr19	-	2	2.29744	0.131023	0.295934
ENSG00000167491.17	chr19	+	2	2.29041	0.131611	0.296907
ENSG00000149823.9	chr11	+	2	2.28478	0.132084	0.29762
ENSG00000173264.15	chr11	+	2	2.28256	0.132271	0.297688
ENSG00000086666.19	chr15	+	2	2.26088	0.134113	0.301476
ENSG00000197714.9	chr19	+	2	2.25594	0.134536	0.30201
ENSG00000149932.17	chr16	+	2	2.25439	0.134669	0.30201
ENSG00000066136.20	chr1	+	2	2.24433	0.135539	0.3036
ENSG00000118971.9	chr12	+	2	2.23644	0.136224	0.304774
ENSG00000153815.17	chr16	+	2	2.23067	0.136728	0.305541
ENSG00000283154.2	chr3	+	2	2.21171	0.138399	0.308647
ENSG00000148411.8	chr9	-	2	2.2112	0.138443	0.308647
ENSG00000133083.15	chr13	-	3	1.97992	0.139735	0.31108
ENSG00000168264.11	chr1	-	2	2.1953	0.139863	0.31108
ENSG00000168385.18	chr2	+	2	2.18152	0.141107	0.313479
ENSG00000108823.16	chr17	+	2	2.16673	0.142454	0.316102
ENSG00000101224.18	chr20	+	2	2.15408	0.143619	0.318056
ENSG00000069399.15	chr19	+	2	2.15332	0.143694	0.318056
ENSG00000101019.22	chr20	-	2	2.15172	0.143838	0.318056
ENSG00000108389.9	chr17	-	2	2.14758	0.144222	0.318175
ENSG00000153904.21	chr1	-	2	2.14752	0.144228	0.318175
ENSG00000138411.13	chr2	-	2	2.14476	0.144485	0.318371
ENSG00000120690.16	chr13	-	2	2.1401	0.14492	0.318958
ENSG00000112893.10	chr5	+	2	2.13634	0.145271	0.319361
ENSG00000100664.11	chr14	+	2	2.12683	0.146166	0.320668
ENSG00000101160.15	chr20	-	3	1.9341	0.146204	0.320668
ENSG00000255248.9	chr11	-	3	1.93201	0.146507	0.32096
ENSG00000156381.9	chr14	-	2	2.11665	0.14713	0.321952
ENSG00000110077.14	chr11	-	2	2.11315	0.147463	0.322309
ENSG00000081377.17	chr9	-	2	2.10487	0.148255	0.323668
ENSG00000170345.10	chr14	+	2	2.10217	0.148522	0.323876
ENSG00000167074.15	chr22	+	2	2.09775	0.14894	0.324414
ENSG00000244687.12	chr20	-	2	2.09327	0.149372	0.324983
ENSG00000198853.12	chr9	+	2	2.09132	0.149561	0.325021
ENSG00000171992.13	chr5	+	3	1.90386	0.15064	0.326346
ENSG00000084070.12	chr1	+	2	2.08	0.150663	0.326346
ENSG00000109390.13	chr4	-	3	1.90354	0.150688	0.326346
ENSG00000165119.21	chr9	-	2	2.07312	0.151336	0.326704
ENSG00000119640.9	chr14	-	2	2.07303	0.151345	0.326704
ENSG00000101161.8	chr20	+	2	2.07277	0.15137	0.326704
ENSG00000072778.20	chr17	+	4	1.77038	0.15208	0.327862
ENSG00000143344.16	chr1	+	2	2.06159	0.152473	0.328336
ENSG00000103852.13	chr15	-	2	2.0553	0.153096	0.328508
ENSG00000176946.12	chr2	-	2	2.05353	0.153273	0.328508
ENSG00000171425.10	chr19	+	2	2.05148	0.153478	0.328508
ENSG00000145901.16	chr5	-	2	2.05076	0.153553	0.328508
ENSG00000213741.11	chr14	-	2	2.0504	0.153585	0.328508
ENSG00000103710.11	chr15	-	2	2.05022	0.153607	0.328508
ENSG00000105576.15	chr19	-	3	1.88308	0.153766	0.328508
ENSG00000131711.15	chr5	+	2	2.03199	0.155436	0.331703
ENSG00000177628.16	chr1	-	2	2.01773	0.156887	0.334422
ENSG00000117595.12	chr1	-	2	2.01236	0.157445	0.335234
ENSG00000163635.20	chr3	+	2	2.00483	0.158213	0.336492
ENSG00000103994.18	chr15	-	3	1.84059	0.160365	0.340685
ENSG00000133315.12	chr11	-	2	1.98012	0.160789	0.340923
ENSG00000163872.16	chr3	+	2	1.97967	0.160836	0.340923
ENSG00000145592.14	chr5	-	2	1.97452	0.161379	0.341511
ENSG00000183072.10	chr5	-	2	1.97362	0.161474	0.341511
ENSG00000160216.21	chr21	+	3	1.82955	0.162125	0.342506
ENSG00000065978.19	chr1	+	2	1.96229	0.162678	0.343179
ENSG00000131408.15	chr19	+	2	1.96108	0.162806	0.343179
ENSG00000100242.15	chr22	-	3	1.81832	0.163935	0.345174
ENSG00000071575.11	chr2	+	2	1.9421	0.164847	0.346546
ENSG00000160299.17	chr21	+	2	1.94118	0.164952	0.346546
ENSG00000277258.5	chr17	-	2	1.93289	0.165847	0.348041
ENSG00000123124.14	chr8	+	2	1.92959	0.166208	0.348412
ENSG00000168916.15	chr5	-	3	1.80252	0.166516	0.348673
ENSG00000179988.15	chr10	+	2	1.9242	0.166798	0.348877
ENSG00000119333.12	chr9	-	2	1.9184	0.167436	0.349824
ENSG00000187778.14	chr12	-	2	1.91498	0.167814	0.350228
ENSG00000178796.13	chr1	+	2	1.91219	0.168122	0.350485
ENSG00000105699.17	chr19	+	2	1.89826	0.169673	0.353329
ENSG00000156110.15	chr10	+	2	1.89387	0.170165	0.353965
ENSG00000012232.9	chr8	+	2	1.88181	0.171526	0.356406
ENSG00000203880.12	chr20	+	2	1.87723	0.172046	0.357094
ENSG00000158352.17	chrX	-	2	1.87003	0.172867	0.358406
ENSG00000042753.12	chr19	-	2	1.86735	0.173174	0.358649
ENSG00000090924.15	chr19	+	2	1.86536	0.173402	0.35873
ENSG00000142192.21	chr21	-	2	1.85794	0.174256	0.359724
ENSG00000131370.16	chr3	-	2	1.85692	0.174374	0.359724
ENSG00000132561.14	chr8	+	2	1.85631	0.174452	0.359724
ENSG00000166292.12	chr17	-	2	1.84932	0.175255	0.360987
ENSG00000115935.18	chr2	-	3	1.74581	0.176126	0.362034
ENSG00000076770.14	chrX	-	2	1.84168	0.176145	0.362034
ENSG00000135387.21	chr11	+	2	1.8287	0.177669	0.364011
ENSG00000171631.16	chr11	+	3	1.73668	0.177724	0.364011
ENSG00000132005.9	chr19	-	2	1.828	0.177753	0.364011
ENSG00000150527.17	chr14	+	2	1.82696	0.177876	0.364011
ENSG00000087266.17	chr4	+	2	1.81653	0.179113	0.366124
ENSG00000160753.16	chr1	+	2	1.81501	0.179294	0.366124
ENSG00000135636.14	chr2	+	2	1.81237	0.17961	0.366374
ENSG00000197580.13	chr11	+	2	1.80938	0.179967	0.366424
ENSG00000166974.13	chr18	+	2	1.80893	0.180022	0.366424
ENSG00000070961.16	chr12	-	2	1.80417	0.180593	0.367194
ENSG00000138835.22	chr9	+	6	1.51877	0.181761	0.36878
ENSG00000088682.14	chr16	+	2	1.79448	0.181763	0.36878
ENSG00000173065.13	chr17	-	2	1.7883	0.182514	0.369785
ENSG00000132646.11	chr20	-	2	1.7872	0.182648	0.369785
ENSG00000204482.11	chr6	+	2	1.78417	0.183018	0.370139
ENSG00000081870.12	chr1	-	2	1.78101	0.183405	0.370525
ENSG00000160360.13	chr9	+	3	1.7028	0.183783	0.370894
ENSG00000101191.17	chr20	-	2	1.76676	0.18516	0.3732
ENSG00000182022.18	chr10	-	2	1.76547	0.18532	0.3732
ENSG00000097007.19	chr9	+	2	1.7517	0.187036	0.375875
ENSG00000163565.19	chr1	+	4	1.60677	0.187102	0.375875
ENSG00000101665.9	chr18	-	2	1.75005	0.187243	0.375875
ENSG00000017797.13	chr18	+	2	1.74674	0.18766	0.376314
ENSG00000265107.3	chr1	-	2	1.74035	0.188473	0.377544
ENSG00000125398.8	chr17	+	2	1.73353	0.189331	0.378244
ENSG00000145362.20	chr4	+	5	1.53935	0.189368	0.378244
ENSG00000020577.14	chr14	+	5	1.53916	0.189422	0.378244
ENSG00000133313.15	chr18	+	2	1.72373	0.190582	0.379907
ENSG00000181830.9	chr11	+	2	1.72315	0.190655	0.379907
ENSG00000182903.16	chr4	-	2	1.7191	0.191176	0.380544
ENSG00000126777.18	chr14	+	3	1.66189	0.191379	0.38055
ENSG00000104964.15	chr19	-	2	1.71055	0.192278	0.3816
ENSG00000102786.15	chr13	-	2	1.71031	0.19231	0.3816
ENSG00000115657.14	chr2	-	2	1.70441	0.193076	0.382718
ENSG00000109501.14	chr4	+	2	1.69504	0.194299	0.38474
ENSG00000078246.17	chr12	+	2	1.68918	0.19507	0.385863
ENSG00000249464.6	chr4	+	2	1.67775	0.196581	0.388239
ENSG00000122644.13	chr7	+	2	1.677	0.196681	0.388239
ENSG00000166963.13	chr15	+	2	1.67456	0.197005	0.388476
ENSG00000169926.11	chr15	+	2	1.66656	0.198074	0.38985
ENSG00000088808.18	chr14	-	2	1.66475	0.198318	0.38985
ENSG00000080493.18	chr4	+	2	1.66474	0.19832	0.38985
ENSG00000188554.15	chr17	+	2	1.662	0.198687	0.390167
ENSG00000092964.18	chr8	+	2	1.65694	0.19937	0.391103
ENSG00000106018.14	chr7	-	2	1.65266	0.199949	0.391692
ENSG00000179915.24	chr2	-	3	1.61642	0.200191	0.391692
ENSG00000187239.17	chr9	-	2	1.65015	0.20029	0.391692
ENSG00000240583.14	chr7	+	3	1.61475	0.200523	0.391743
ENSG00000102547.19	chr13	-	2	1.64514	0.200972	0.392215
ENSG00000086015.22	chr1	+	2	1.64214	0.201381	0.39261
ENSG00000086758.16	chrX	-	2	1.62908	0.203175	0.395701
ENSG00000131386.19	chr3	+	2	1.62664	0.203514	0.395953
ENSG00000159023.22	chr1	+	2	1.62258	0.204077	0.396221
ENSG00000108924.14	chr17	+	3	1.59613	0.204255	0.396221
ENSG00000198947.17	chrX	-	3	1.5955	0.204382	0.396221
ENSG00000099341.12	chr19	+	2	1.61962	0.204488	0.396221
ENSG00000247596.10	chr3	-	2	1.61298	0.205417	0.397615
ENSG00000125746.18	chr19	-	2	1.60766	0.206161	0.398648
ENSG00000264247.2	chr18	-	2	1.59873	0.20742	0.400675
ENSG00000140743.8	chr16	-	2	1.59343	0.208174	0.401711
ENSG00000105483.18	chr19	-	2	1.59197	0.208381	0.401711
ENSG00000169813.16	chr10	-	3	1.56935	0.209744	0.403927
ENSG00000169946.14	chr8	+	2	1.57776	0.210416	0.40481
ENSG00000104870.13	chr19	+	2	1.57446	0.210891	0.405314
ENSG00000108387.15	chr17	-	3	1.56267	0.211137	0.40534
ENSG00000052126.15	chr12	+	2	1.57048	0.211467	0.40534
ENSG00000122417.15	chr1	-	2	1.56993	0.211547	0.40534
ENSG00000185532.20	chr10	+	2	1.56822	0.211795	0.405406
ENSG00000154153.14	chr5	-	2	1.56612	0.212103	0.405586
ENSG00000123815.13	chr19	-	4	1.50469	0.212653	0.405944
ENSG00000092098.17	chr14	+	2	1.5617	0.212744	0.405944
ENSG00000213160.10	chr2	+	2	1.55976	0.213028	0.405944
ENSG00000110446.12	chr11	-	2	1.55894	0.213147	0.405944
ENSG00000158417.11	chr2	+	2	1.55553	0.213647	0.406487
ENSG00000130811.12	chr19	-	2	1.55331	0.213973	0.406699
ENSG00000140545.15	chr15	-	2	1.54808	0.214742	0.40771
ENSG00000232310.8	chr6	-	2	1.54668	0.214956	0.40771
ENSG00000105707.15	chr19	+	2	1.5442	0.215317	0.40771
ENSG00000166272.18	chr10	+	2	1.54387	0.215365	0.40771
ENSG00000133460.19	chr22	+	2	1.54187	0.215661	0.407862
ENSG00000136574.18	chr8	+	3	1.53864	0.216223	0.408518
ENSG00000014216.16	chr11	+	2	1.53332	0.216934	0.409452
ENSG00000203739.4	chr1	-	2	1.52975	0.217468	0.410052
ENSG00000169045.17	chr5	-	2	1.52757	0.217795	0.41026
ENSG00000245532.9	chr11	+	2	1.52026	0.2189	0.411932
ENSG00000132334.17	chr10	+	3	1.52316	0.219564	0.412463
ENSG00000141867.19	chr19	-	2	1.51475	0.21973	0.412463
ENSG00000162670.11	chr1	-	2	1.51406	0.219835	0.412463
ENSG00000165912.16	chr11	-	2	1.50813	0.220737	0.413746
ENSG00000101333.18	chr20	+	2	1.50222	0.221641	0.415029
ENSG00000084674.15	chr2	-	2	1.49732	0.222398	0.416036
ENSG00000085831.16	chr1	-	3	1.50816	0.222851	0.416472
ENSG00000163605.15	chr3	+	3	1.50543	0.223455	0.416938
ENSG00000010818.10	chr6	-	2	1.4899	0.22354	0.416938
ENSG00000086200.17	chr5	+	2	1.48758	0.223899	0.417196
ENSG00000163848.20	chr3	-	2	1.47912	0.225216	0.419238
ENSG00000172824.16	chr16	+	2	1.4748	0.225892	0.419741
ENSG00000115194.11	chr2	-	2	1.47456	0.225929	0.419741
ENSG00000121933.19	chr1	-	3	1.49275	0.226282	0.419957
ENSG00000102781.14	chr13	-	2	1.47058	0.226555	0.419957
ENSG00000153406.14	chr16	-	2	1.46959	0.22671	0.419957
ENSG00000031003.10	chr5	-	2	1.46652	0.227194	0.420443
ENSG00000172159.16	chr9	-	2	1.46126	0.228027	0.421572
ENSG00000160808.11	chr3	-	2	1.45696	0.228717	0.422194
ENSG00000114126.18	chr3	-	3	1.48154	0.228809	0.422194
ENSG00000224861.1	chr14	-	2	1.45138	0.229601	0.422926
ENSG00000183963.19	chr22	+	2	1.45106	0.229652	0.422926
ENSG00000111912.20	chr6	+	4	1.43822	0.231004	0.42487
ENSG00000039523.20	chr16	+	2	1.4417	0.231156	0.42487
ENSG00000105227.16	chr19	-	2	1.43911	0.231573	0.425224
ENSG00000142875.19	chr1	+	2	1.43316	0.232538	0.426582
ENSG00000166091.21	chr14	+	2	1.42649	0.233623	0.427981
ENSG00000134504.14	chr18	-	2	1.42571	0.233752	0.427981
ENSG00000151414.15	chr1	+	2	1.4221	0.234342	0.428533
ENSG00000152556.17	chr12	+	5	1.39459	0.234506	0.428533
ENSG00000075651.16	chr3	-	2	1.41876	0.234892	0.428824
ENSG00000113916.18	chr3	-	2	1.41329	0.235792	0.430055
ENSG00000243678.12	chr17	+	2	1.4056	0.237067	0.431963
ENSG00000119927.14	chr10	-	2	1.40369	0.23739	0.432137
ENSG00000274750.2	chr6	+	2	1.39666	0.238559	0.433847
ENSG00000179335.19	chr15	+	2	1.38996	0.239684	0.435476
ENSG00000158321.18	chr7	+	3	1.43292	0.240105	0.435823
ENSG00000160801.14	chr3	+	2	1.38579	0.24039	0.435923
ENSG00000168405.17	chr6	-	3	1.4251	0.241975	0.438377
ENSG00000100201.23	chr22	-	2	1.36931	0.243196	0.440037
ENSG00000204438.11	chr6	-	2	1.36838	0.243355	0.440037
ENSG00000054148.18	chr9	+	2	1.35881	0.245006	0.442599
ENSG00000197063.11	chr17	-	2	1.3551	0.245649	0.443339
ENSG00000152894.15	chr6	-	2	1.35036	0.246474	0.444403
ENSG00000132329.11	chr2	+	2	1.34826	0.24684	0.444413
ENSG00000148450.13	chr10	+	2	1.34765	0.246948	0.444413
ENSG00000065989.16	chr19	+	2	1.32961	0.250125	0.449703
ENSG00000135250.17	chr7	-	3	1.38952	0.250663	0.450016
ENSG00000145016.16	chr3	-	2	1.32597	0.250774	0.450016
ENSG00000118137.10	chr11	-	2	1.31856	0.252104	0.451974
ENSG00000068745.15	chr3	-	3	1.38057	0.252895	0.452928
ENSG00000138964.17	chr22	+	2	1.31291	0.253114	0.452928
ENSG00000060656.20	chr1	+	2	1.31136	0.253393	0.452999
ENSG00000137507.11	chr11	-	2	1.30697	0.254186	0.453575
ENSG00000177426.22	chr18	+	3	1.37467	0.254381	0.453575
ENSG00000198042.11	chr8	+	2	1.30406	0.254715	0.453575
ENSG00000182326.15	chr12	+	2	1.30313	0.254882	0.453575
ENSG00000047315.17	chr4	+	2	1.30297	0.254912	0.453575
ENSG00000130158.14	chr19	-	2	1.29879	0.255673	0.454503
ENSG00000104872.11	chr19	-	2	1.29129	0.257047	0.456254
ENSG00000112624.12	chr6	+	2	1.29079	0.257139	0.456254
ENSG00000198270.13	chr12	-	2	1.28704	0.257829	0.456722
ENSG00000166532.16	chr12	+	2	1.28673	0.257885	0.456722
ENSG00000085276.19	chr3	-	3	1.35373	0.25972	0.459542
ENSG00000272391.6	chr7	-	2	1.27514	0.260035	0.45967
ENSG00000198336.9	chr17	+	3	1.35013	0.260652	0.460269
ENSG00000196712.18	chr17	+	2	1.27072	0.260859	0.460269
ENSG00000168883.20	chr2	+	2	1.26677	0.2616	0.461045
ENSG00000169764.16	chr2	+	3	1.34527	0.261906	0.461045
ENSG00000196576.16	chr22	-	2	1.26449	0.262029	0.461045
ENSG00000181894.15	chr19	-	2	1.25509	0.263805	0.463738
ENSG00000036549.13	chr1	-	2	1.25167	0.264453	0.464448
ENSG00000154978.13	chr7	-	2	1.24503	0.265722	0.465986
ENSG00000204954.10	chr12	-	2	1.24343	0.266028	0.465986
ENSG00000116171.19	chr1	+	2	1.24323	0.266067	0.465986
ENSG00000135905.20	chr2	-	2	1.23802	0.267067	0.467305
ENSG00000101246.20	chr20	-	2	1.23658	0.267344	0.467359
ENSG00000188191.15	chr7	-	2	1.22945	0.268724	0.469329
ENSG00000197905.10	chr12	+	2	1.22821	0.268966	0.469329
ENSG00000198796.7	chr18	-	2	1.22379	0.269827	0.46993
ENSG00000177200.17	chr16	+	4	1.31188	0.269967	0.46993
ENSG00000073536.18	chr17	-	2	1.22149	0.270282	0.46993
ENSG00000122378.14	chr10	+	2	1.22135	0.270303	0.46993
ENSG00000132906.18	chr1	-	2	1.2132	0.271902	0.47169
ENSG00000164054.15	chr3	-	2	1.21274	0.271994	0.47169
ENSG00000230590.11	chrX	-	2	1.21239	0.272062	0.47169
ENSG00000163485.17	chr1	+	2	1.20833	0.272865	0.472163
ENSG00000116871.15	chr1	+	2	1.20824	0.272881	0.472163
ENSG00000154358.23	chr1	+	3	1.30214	0.273355	0.472163
ENSG00000116675.16	chr1	+	2	1.2057	0.273385	0.472163
ENSG00000150995.20	chr3	+	2	1.20448	0.273628	0.472163
ENSG00000139146.14	chr12	-	2	1.20255	0.274012	0.472163
ENSG00000167543.16	chr17	+	3	1.29895	0.274222	0.472163
ENSG00000100320.23	chr22	-	2	1.20073	0.274373	0.472163
ENSG00000103495.14	chr16	+	2	1.19971	0.274577	0.472163
ENSG00000075239.14	chr11	+	3	1.29082	0.276443	0.474762
ENSG00000156958.15	chr15	+	2	1.18967	0.27659	0.474762
ENSG00000159267.16	chr21	-	2	1.18746	0.277034	0.475095
ENSG00000251562.8	chr11	+	2	1.18381	0.277773	0.475931
ENSG00000157216.16	chr1	-	2	1.18233	0.278072	0.476013
ENSG00000148219.18	chr9	-	2	1.17627	0.279307	0.477609
ENSG00000188677.15	chr22	+	2	1.17527	0.279508	0.477609
ENSG00000178882.15	chr12	+	2	1.16496	0.28162	0.480589
ENSG00000130304.17	chr19	+	2	1.16429	0.28176	0.480589
ENSG00000165671.21	chr5	+	2	1.15484	0.283715	0.483488
ENSG00000161642.18	chr12	-	2	1.14949	0.284832	0.484956
ENSG00000120742.11	chr3	-	2	1.14465	0.285844	0.485745
ENSG00000131788.16	chr1	-	2	1.14348	0.28609	0.485745
ENSG00000168016.15	chr3	-	2	1.14297	0.286197	0.485745
ENSG00000104904.12	chr19	+	2	1.14238	0.286321	0.485745
ENSG00000176490.5	chr19	-	2	1.14017	0.286787	0.486101
ENSG00000184601.11	chr14	+	2	1.13868	0.287101	0.486184
ENSG00000159251.8	chr15	-	4	1.26082	0.287349	0.486184
ENSG00000075391.17	chr1	+	2	1.13262	0.288384	0.487225
ENSG00000147526.20	chr8	+	3	1.24698	0.288735	0.487225
ENSG00000145391.14	chr4	-	2	1.12898	0.289158	0.487225
ENSG00000189337.17	chr1	+	2	1.12793	0.289382	0.487225
ENSG00000114853.15	chr3	+	2	1.12782	0.289405	0.487225
ENSG00000115649.16	chr2	-	2	1.12727	0.289522	0.487225
ENSG00000102226.10	chrX	+	2	1.12614	0.289764	0.487225
ENSG00000049323.16	chr2	+	2	1.12194	0.290663	0.488303
ENSG00000072609.18	chr12	-	2	1.11873	0.291352	0.488479
ENSG00000134243.12	chr1	-	3	1.23604	0.291885	0.488479
ENSG00000120729.10	chr5	+	2	1.1159	0.291968	0.488479
ENSG00000139218.18	chr12	-	2	1.11542	0.292065	0.488479
ENSG00000166068.13	chr15	+	2	1.11431	0.292306	0.488479
ENSG00000084234.18	chr11	+	3	1.23456	0.292314	0.488479
ENSG00000197461.13	chr7	-	2	1.11132	0.292952	0.489114
ENSG00000196230.14	chr6	+	2	1.10842	0.29358	0.489731
ENSG00000106211.10	chr7	+	2	1.10421	0.294497	0.490829
ENSG00000172346.15	chr22	+	2	1.10122	0.295151	0.491486
ENSG00000170027.7	chr7	-	2	1.09866	0.29571	0.491984
ENSG00000145860.12	chr5	-	2	1.08123	0.299564	0.49796
ENSG00000170153.11	chr4	-	2	1.07946	0.299958	0.498178
ENSG00000109452.12	chr4	-	2	1.07572	0.300796	0.499131
ENSG00000154710.18	chr7	+	2	1.07354	0.301286	0.499203
ENSG00000172765.17	chr3	-	2	1.07291	0.301427	0.499203
ENSG00000198521.12	chr19	-	2	1.0709	0.301879	0.499203
ENSG00000124788.19	chr6	-	2	1.07084	0.301893	0.499203
ENSG00000169862.19	chr5	-	2	1.06562	0.303071	0.500393
ENSG00000240849.11	chr20	-	2	1.06531	0.30314	0.500393
ENSG00000131697.18	chr1	-	2	1.06265	0.303743	0.500867
ENSG00000214530.10	chr11	-	2	1.06149	0.304006	0.500867
ENSG00000198722.14	chr9	+	2	1.05967	0.304421	0.500867
ENSG00000143549.21	chr1	-	3	1.19348	0.304485	0.500867
ENSG00000138162.19	chr10	+	4	1.21211	0.304865	0.500988
ENSG00000143995.20	chr2	+	2	1.05675	0.305087	0.500988
ENSG00000088387.19	chr13	-	2	1.05521	0.305439	0.501132
ENSG00000184220.12	chr3	+	2	1.05096	0.306411	0.502292
ENSG00000178127.13	chr18	+	3	1.18331	0.307572	0.503759
ENSG00000174851.16	chr11	-	2	1.04278	0.308297	0.504153
ENSG00000125844.16	chr20	-	2	1.04217	0.308438	0.504153
ENSG00000095066.12	chr19	-	3	1.17991	0.308611	0.504153
ENSG00000119335.17	chr9	+	2	1.04018	0.3089	0.50417
ENSG00000100628.12	chr14	-	2	1.03769	0.309478	0.50417
ENSG00000105202.9	chr19	-	2	1.03752	0.309517	0.50417
ENSG00000157654.19	chr9	+	7	1.18951	0.309685	0.50417
ENSG00000183010.17	chr17	-	2	1.03089	0.311064	0.505595
ENSG00000165458.14	chr11	+	2	1.03077	0.311094	0.505595
ENSG00000122643.22	chr7	-	2	1.02842	0.311644	0.506054
ENSG00000114439.19	chr3	+	2	1.02471	0.312516	0.507035
ENSG00000101605.13	chr18	-	2	1.02177	0.313211	0.507728
ENSG00000204138.13	chr1	+	2	1.01598	0.314582	0.509356
ENSG00000008294.21	chr17	-	2	1.01526	0.314753	0.509356
ENSG00000171492.14	chr1	+	2	1.00747	0.316613	0.51193
ENSG00000155366.17	chr1	-	2	1.00362	0.317537	0.512986
ENSG00000129009.13	chr15	+	2	1.00079	0.318218	0.51327
ENSG00000184640.20	chr17	+	4	1.17654	0.318255	0.51327
ENSG00000175216.15	chr11	-	2	0.998226	0.318838	0.513773
ENSG00000149269.10	chr11	-	2	0.990204	0.320786	0.516473
ENSG00000146834.14	chr7	+	2	0.986085	0.321792	0.517512
ENSG00000196914.9	chr11	+	2	0.985329	0.321977	0.517512
ENSG00000122986.14	chr12	-	2	0.984119	0.322274	0.51755
ENSG00000076555.15	chr12	+	4	1.16467	0.322841	0.518023
ENSG00000255399.4	chr12	+	2	0.97962	0.32338	0.518448
ENSG00000159069.14	chr9	-	2	0.976452	0.324162	0.51903
ENSG00000246695.8	chr12	-	2	0.975929	0.324291	0.51903
ENSG00000121316.11	chr12	-	2	0.972207	0.325213	0.520067
ENSG00000068971.14	chr11	+	2	0.968418	0.326156	0.520872
ENSG00000127084.19	chr9	+	2	0.967056	0.326496	0.520872
ENSG00000133027.18	chr17	-	2	0.966872	0.326541	0.520872
ENSG00000167703.15	chr17	-	2	0.963539	0.327375	0.521763
ENSG00000131089.17	chrX	-	3	1.11679	0.328573	0.523231
ENSG00000069122.19	chr6	-	2	0.955406	0.32942	0.524141
ENSG00000165192.14	chrX	-	2	0.953288	0.329956	0.524553
ENSG00000168273.8	chr3	+	2	0.952155	0.330243	0.524569
ENSG00000196535.17	chr17	-	2	0.943347	0.332485	0.527298
ENSG00000012171.20	chr3	+	2	0.94322	0.332518	0.527298
ENSG00000175920.18	chr4	+	2	0.939341	0.333512	0.528432
ENSG00000125834.13	chr20	+	2	0.929479	0.336057	0.531772
ENSG00000184702.20	chr22	+	3	1.09375	0.336181	0.531772
ENSG00000109654.16	chr4	+	2	0.927675	0.336525	0.531873
ENSG00000149131.17	chr11	+	2	0.92411	0.337453	0.532895
ENSG00000070831.17	chr1	+	2	0.921724	0.338077	0.533435
ENSG00000116685.16	chr1	-	2	0.91978	0.338591	0.53366
ENSG00000130844.19	chr19	+	2	0.919027	0.338783	0.53366
ENSG00000089876.12	chr10	-	2	0.917691	0.339134	0.533769
ENSG00000105993.15	chr7	+	2	0.914	0.340105	0.534448
ENSG00000171988.19	chr10	-	3	1.08112	0.340425	0.534448
ENSG00000163947.12	chr3	-	3	1.08025	0.34072	0.534448
ENSG00000197050.11	chr19	+	2	0.910496	0.34103	0.534448
ENSG00000188549.12	chr15	-	2	0.909972	0.341169	0.534448
ENSG00000171681.12	chr12	+	2	0.909482	0.341299	0.534448
ENSG00000079805.18	chr19	+	2	0.908575	0.341539	0.534448
ENSG00000119383.21	chr9	+	3	1.07312	0.343141	0.536512
ENSG00000198034.11	chrX	-	2	0.901399	0.343448	0.53655
ENSG00000008513.16	chr8	-	2	0.898898	0.344118	0.537152
ENSG00000127472.11	chr1	+	2	0.891992	0.345974	0.539281
ENSG00000131873.7	chr15	-	2	0.891229	0.34618	0.539281
ENSG00000130054.5	chrX	+	2	0.889886	0.346546	0.539281
ENSG00000198393.8	chr12	+	2	0.889602	0.34662	0.539281
ENSG00000141562.18	chr17	+	2	0.887892	0.347083	0.539559
ENSG00000245060.8	chr5	+	2	0.873756	0.350942	0.544966
ENSG00000145390.11	chr4	+	2	0.873051	0.351136	0.544966
ENSG00000128272.16	chr22	+	2	0.860934	0.354494	0.549727
ENSG00000005882.12	chr17	+	2	0.855467	0.356024	0.551515
ENSG00000067057.18	chr10	+	4	1.0817	0.356543	0.551515
ENSG00000059145.19	chr16	-	2	0.852105	0.356969	0.551515
ENSG00000189308.11	chr4	-	2	0.851963	0.357009	0.551515
ENSG00000151276.23	chr3	-	2	0.850476	0.357428	0.551515
ENSG00000186073.14	chr15	+	2	0.848706	0.357933	0.551515
ENSG00000118596.12	chr12	+	2	0.848587	0.357961	0.551515
ENSG00000127870.17	chr13	-	2	0.848537	0.357975	0.551515
ENSG00000076944.16	chr19	+	2	0.845704	0.358778	0.552302
ENSG00000177119.17	chr12	+	2	0.836155	0.3615	0.556041
ENSG00000163539.17	chr3	-	3	1.01722	0.36274	0.557496
ENSG00000142230.13	chr19	+	3	1.01318	0.3642	0.558674
ENSG00000169756.16	chr2	+	3	1.0128	0.364337	0.558674
ENSG00000224051.7	chr1	+	2	0.826122	0.364391	0.558674
ENSG00000167994.13	chr11	-	2	0.823715	0.365089	0.559292
ENSG00000124588.22	chr6	+	2	0.82091	0.365905	0.560089
ENSG00000101608.13	chr18	+	2	0.81759	0.366877	0.560407
ENSG00000132386.11	chr17	+	2	0.817095	0.36702	0.560407
ENSG00000145819.18	chr5	+	2	0.816423	0.367216	0.560407
ENSG00000116128.11	chr1	+	2	0.816151	0.367296	0.560407
ENSG00000159128.15	chr21	+	2	0.813476	0.368081	0.560868
ENSG00000170634.13	chr2	+	3	1.00222	0.36819	0.560868
ENSG00000136153.20	chr13	+	3	1.00059	0.368785	0.561192
ENSG00000168000.15	chr11	-	2	0.809493	0.369254	0.561192
ENSG00000173638.19	chr21	-	2	0.808872	0.369437	0.561192
ENSG00000071242.12	chr6	-	2	0.807746	0.36977	0.561192
ENSG00000155324.10	chr5	+	2	0.807362	0.369884	0.561192
ENSG00000112837.17	chr6	-	2	0.800602	0.371891	0.563787
ENSG00000170439.7	chr12	+	2	0.799154	0.372329	0.563999
ENSG00000132478.10	chr17	+	2	0.796514	0.373113	0.564735
ENSG00000127824.14	chr2	-	2	0.793976	0.373874	0.565354
ENSG00000140350.15	chr15	-	2	0.792826	0.374219	0.565354
ENSG00000198517.10	chr7	+	2	0.792171	0.374417	0.565354
ENSG00000182473.22	chr17	-	2	0.78817	0.375624	0.566177
ENSG00000138185.20	chr10	+	2	0.787402	0.375856	0.566177
ENSG00000179409.11	chr17	-	2	0.787395	0.375858	0.566177
ENSG00000121057.13	chr17	+	2	0.779622	0.378221	0.569283
ENSG00000196498.13	chr12	-	4	1.02939	0.379339	0.56988
ENSG00000177311.11	chr3	+	2	0.775874	0.379367	0.56988
ENSG00000075292.19	chr2	+	2	0.775379	0.379519	0.56988
ENSG00000145012.13	chr3	+	3	0.969579	0.38033	0.570646
ENSG00000185825.17	chrX	-	2	0.771587	0.380685	0.570726
ENSG00000181513.15	chr17	+	2	0.766372	0.382297	0.572676
ENSG00000101294.18	chr20	+	2	0.765426	0.38259	0.572676
ENSG00000073417.15	chr15	+	2	0.76236	0.383543	0.573649
ENSG00000223969.6	chr7	-	2	0.759695	0.384374	0.574439
ENSG00000138413.14	chr2	-	2	0.753314	0.386375	0.576613
ENSG00000185215.11	chr14	+	2	0.752068	0.386772	0.576613
ENSG00000168214.21	chr4	+	2	0.751885	0.386825	0.576613
ENSG00000102531.16	chr13	+	3	0.951972	0.387046	0.576613
ENSG00000144579.8	chr2	+	2	0.747231	0.388296	0.577968
ENSG00000164849.10	chr7	+	2	0.74638	0.388566	0.577968
ENSG00000128951.14	chr15	+	2	0.74397	0.389331	0.578653
ENSG00000108984.15	chr17	+	2	0.742813	0.3897	0.578747
ENSG00000137573.14	chr8	+	2	0.740891	0.390313	0.579203
ENSG00000106025.9	chr7	-	2	0.737592	0.391368	0.580315
ENSG00000060237.19	chr12	+	2	0.735858	0.391924	0.580686
ENSG00000235927.4	chr1	-	2	0.725797	0.395175	0.585045
ENSG00000081189.16	chr5	-	2	0.723863	0.395805	0.585407
ENSG00000100813.14	chr14	-	2	0.722829	0.396142	0.585407
ENSG00000136603.14	chr3	+	2	0.721379	0.396615	0.585407
ENSG00000108679.13	chr17	-	2	0.720618	0.396864	0.585407
ENSG00000143401.15	chr1	-	2	0.72031	0.396965	0.585407
ENSG00000144935.15	chr3	+	2	0.716724	0.398141	0.586685
ENSG00000131759.18	chr17	+	3	0.922632	0.398504	0.586763
ENSG00000154678.18	chr7	-	2	0.713579	0.399176	0.587297
ENSG00000120899.18	chr8	+	2	0.70533	0.40191	0.590221
ENSG00000141298.19	chr17	-	2	0.704837	0.402075	0.590221
ENSG00000143554.14	chr1	+	2	0.704767	0.402098	0.590221
ENSG00000162496.9	chr1	-	2	0.703033	0.402676	0.590613
ENSG00000153094.24	chr2	+	2	0.701725	0.403114	0.590797
ENSG00000187535.14	chr16	-	2	0.700193	0.403627	0.591092
ENSG00000197321.15	chr10	-	3	0.906881	0.404794	0.592344
ENSG00000104490.18	chr8	-	2	0.688139	0.407697	0.596131
ENSG00000079432.8	chr19	+	2	0.687162	0.40803	0.596157
ENSG00000173928.4	chr19	+	2	0.682864	0.409497	0.597841
ENSG00000146592.17	chr7	+	2	0.677167	0.411455	0.600237
ENSG00000231607.13	chr13	-	2	0.670686	0.413699	0.603045
ENSG00000204634.13	chr2	-	2	0.666784	0.415058	0.604195
ENSG00000164953.16	chr8	+	2	0.665075	0.415656	0.604195
ENSG00000137962.13	chr1	-	2	0.664358	0.415907	0.604195
ENSG00000064042.18	chr4	+	3	0.87815	0.416528	0.604195
ENSG00000173406.16	chr1	-	2	0.66195	0.416752	0.604195
ENSG00000170421.12	chr12	-	2	0.661599	0.416875	0.604195
ENSG00000107738.20	chr10	-	2	0.661457	0.416925	0.604195
ENSG00000132640.15	chr20	+	2	0.661137	0.417038	0.604195
ENSG00000141524.17	chr17	-	2	0.659579	0.417586	0.604343
ENSG00000143632.14	chr1	-	2	0.657992	0.418151	0.604343
ENSG00000137831.15	chr15	-	2	0.657248	0.418409	0.604343
ENSG00000080709.16	chr5	+	2	0.65723	0.418416	0.604343
ENSG00000148339.12	chr9	+	2	0.654673	0.419321	0.605189
ENSG00000127863.16	chr13	+	2	0.650643	0.420754	0.606795
ENSG00000166949.17	chr15	+	2	0.649622	0.421118	0.606859
ENSG00000079102.16	chr8	-	2	0.646761	0.422141	0.60787
ENSG00000152082.15	chr2	+	2	0.643413	0.423343	0.609139
ENSG00000273899.5	chr22	+	2	0.641886	0.423893	0.609467
ENSG00000169071.15	chr9	-	2	0.640959	0.424227	0.609485
ENSG00000188312.14	chr9	+	2	0.639464	0.424768	0.609799
ENSG00000143013.13	chr1	+	2	0.638159	0.42524	0.610015
ENSG00000179526.17	chr8	-	3	0.854238	0.426555	0.611438
ENSG00000161513.12	chr17	-	2	0.630355	0.428081	0.613133
ENSG00000153113.24	chr5	+	5	0.961113	0.428384	0.613133
ENSG00000196628.20	chr18	-	6	0.97895	0.429748	0.614621
ENSG00000150636.17	chr18	+	2	0.621482	0.431346	0.616418
ENSG00000189350.13	chr2	+	2	0.620645	0.431656	0.616418
ENSG00000175182.15	chr3	+	2	0.618291	0.432529	0.617162
ENSG00000129116.19	chr4	+	3	0.839563	0.432828	0.617162
ENSG00000236404.10	chr9	-	3	0.837484	0.433724	0.617969
ENSG00000121281.13	chr16	+	3	0.836339	0.434219	0.617969
ENSG00000040341.18	chr8	-	2	0.61335	0.434372	0.617969
ENSG00000197565.16	chrX	-	2	0.60887	0.436052	0.619894
ENSG00000188257.12	chr1	-	2	0.604023	0.437887	0.622035
ENSG00000130299.17	chr19	+	2	0.600834	0.439092	0.623281
ENSG00000004059.11	chr7	+	2	0.598569	0.439955	0.624038
ENSG00000144331.20	chr2	-	3	0.817857	0.442278	0.626864
ENSG00000170365.10	chr4	+	2	0.588967	0.443642	0.628157
ENSG00000116857.17	chr1	-	2	0.588418	0.443854	0.628157
ENSG00000110492.16	chr11	+	2	0.58419	0.445493	0.630008
ENSG00000164692.18	chr7	+	5	0.928855	0.446738	0.631297
ENSG00000160271.16	chr9	-	3	0.805761	0.447633	0.631719
ENSG00000124225.16	chr20	-	2	0.57853	0.447704	0.631719
ENSG00000116754.13	chr1	+	2	0.572996	0.449881	0.634227
ENSG00000138193.16	chr10	+	2	0.572313	0.450151	0.634227
ENSG00000011465.18	chr12	-	5	0.921979	0.450722	0.634524
ENSG00000197182.14	chr22	+	3	0.797471	0.451341	0.634524
ENSG00000156011.17	chr8	-	3	0.797415	0.451366	0.634524
ENSG00000166484.20	chr17	+	2	0.564691	0.453179	0.635557
ENSG00000166965.12	chr15	+	2	0.564207	0.453373	0.635557
ENSG00000145743.17	chr5	-	2	0.563873	0.453506	0.635557
ENSG00000100234.12	chr22	+	2	0.563215	0.45377	0.635557
ENSG00000141905.19	chr19	+	7	0.955615	0.45444	0.635557
ENSG00000152242.11	chr18	+	2	0.561192	0.454581	0.635557
ENSG00000139160.13	chr12	+	2	0.560803	0.454737	0.635557
ENSG00000140859.16	chr16	-	2	0.560685	0.454784	0.635557
ENSG00000072518.22	chr11	+	2	0.55552	0.456867	0.637997
ENSG00000095370.20	chr9	-	3	0.782316	0.458199	0.638942
ENSG00000222041.11	chr2	+	2	0.552186	0.458219	0.638942
ENSG00000139323.14	chr12	-	2	0.551359	0.458555	0.638942
ENSG00000132819.17	chr20	+	2	0.549606	0.459269	0.639227
ENSG00000175449.14	chr5	+	2	0.549202	0.459434	0.639227
ENSG00000169375.16	chr15	-	2	0.547682	0.460055	0.63928
ENSG00000169122.11	chr8	+	2	0.547458	0.460147	0.63928
ENSG00000102678.7	chr13	+	2	0.54456	0.461335	0.639865
ENSG00000007237.19	chr17	-	4	0.860764	0.46143	0.639865
ENSG00000173372.17	chr1	+	2	0.543782	0.461657	0.639865
ENSG00000069424.15	chr1	+	3	0.774194	0.461919	0.639865
ENSG00000032444.17	chr19	+	2	0.538309	0.463916	0.642162
ENSG00000153487.13	chr13	+	2	0.535303	0.465164	0.642553
ENSG00000164125.16	chr4	-	2	0.535225	0.465197	0.642553
ENSG00000170892.13	chr19	+	2	0.535182	0.465215	0.642553
ENSG00000048740.18	chr10	+	3	0.763005	0.467092	0.644163
ENSG00000198482.14	chr19	+	2	0.529413	0.467628	0.644163
ENSG00000163171.8	chr2	-	2	0.528922	0.467833	0.644163
ENSG00000113580.15	chr5	-	2	0.52854	0.467994	0.644163
ENSG00000187091.14	chr3	-	2	0.527823	0.468296	0.644163
ENSG00000182606.17	chr3	+	2	0.527527	0.468421	0.644163
ENSG00000073849.16	chr3	+	3	0.759363	0.468788	0.644201
ENSG00000187098.17	chr3	+	3	0.758422	0.469227	0.644337
ENSG00000149591.17	chr11	+	2	0.524271	0.469799	0.644374
ENSG00000134884.15	chr13	-	2	0.523941	0.469934	0.644374
ENSG00000132635.17	chr20	-	2	0.521514	0.470964	0.645319
ENSG00000141447.18	chr18	-	2	0.520468	0.471408	0.645461
ENSG00000248923.1	chr5	-	2	0.519265	0.471922	0.645699
ENSG00000215252.11	chr15	-	2	0.517615	0.472624	0.646193
ENSG00000168071.22	chr11	+	2	0.516307	0.473184	0.646491
ENSG00000069667.16	chr15	-	2	0.514524	0.473948	0.646856
ENSG00000178031.18	chr9	+	2	0.514091	0.474134	0.646856
ENSG00000132849.21	chr1	+	2	0.509374	0.476166	0.649162
ENSG00000149091.15	chr11	+	4	0.830134	0.477801	0.650785
ENSG00000188522.15	chr17	-	2	0.504345	0.478353	0.650785
ENSG00000066629.18	chr14	+	2	0.503498	0.478718	0.650785
ENSG00000152413.15	chr5	-	2	0.503471	0.47873	0.650785
ENSG00000181031.16	chr17	-	2	0.498807	0.480772	0.652475
ENSG00000150347.17	chr10	+	2	0.497709	0.481255	0.652475
ENSG00000124772.12	chr6	-	3	0.732846	0.481328	0.652475
ENSG00000150401.15	chr13	-	2	0.497136	0.481507	0.652475
ENSG00000134871.19	chr13	+	2	0.496507	0.481784	0.652475
ENSG00000171700.14	chr20	-	2	0.495098	0.482406	0.652475
ENSG00000186260.17	chr16	+	3	0.73051	0.482447	0.652475
ENSG00000065802.12	chr2	+	2	0.493704	0.483023	0.652475
ENSG00000204256.14	chr6	+	3	0.729209	0.483073	0.652475
ENSG00000099797.15	chr19	+	2	0.49076	0.484329	0.653563
ENSG00000023191.17	chr11	-	3	0.726105	0.484568	0.653563
ENSG00000057294.15	chr12	-	2	0.488176	0.48548	0.654327
ENSG00000182175.14	chr15	-	2	0.484475	0.487137	0.656094
ENSG00000110693.18	chr11	-	2	0.483355	0.48764	0.656305
ENSG00000130529.16	chr19	+	2	0.480592	0.488885	0.657514
ENSG00000141127.15	chr17	+	2	0.479594	0.489337	0.657654
ENSG00000173120.15	chr11	+	2	0.473941	0.491905	0.660638
ENSG00000102606.18	chr13	+	4	0.803046	0.49266	0.661183
ENSG00000114480.13	chr3	-	2	0.468294	0.494493	0.663174
ENSG00000053918.18	chr11	+	2	0.466342	0.495393	0.663911
ENSG00000151914.21	chr6	-	6	0.87617	0.496617	0.664794
ENSG00000166313.19	chr11	-	2	0.462962	0.496958	0.664794
ENSG00000142173.16	chr21	+	4	0.795068	0.497104	0.664794
ENSG00000119707.14	chr14	+	2	0.456156	0.500135	0.668375
ENSG00000005238.20	chr9	-	2	0.453802	0.501242	0.669383
ENSG00000114473.14	chr3	-	3	0.688695	0.502958	0.671136
ENSG00000143153.13	chr1	+	2	0.449216	0.50341	0.671136
ENSG00000198844.12	chr17	+	2	0.447999	0.503989	0.671136
ENSG00000162433.15	chr1	+	3	0.686238	0.50419	0.671136
ENSG00000136715.19	chr2	-	2	0.44729	0.504326	0.671136
ENSG00000137275.16	chr6	+	2	0.443667	0.506056	0.672965
ENSG00000011454.18	chr9	+	2	0.442259	0.506731	0.67339
ENSG00000113312.11	chr5	+	2	0.440591	0.507532	0.673983
ENSG00000134326.12	chr2	-	2	0.43924	0.508183	0.674374
ENSG00000204590.12	chr6	-	2	0.435502	0.509992	0.676301
ENSG00000110871.15	chr12	-	2	0.430043	0.512653	0.679355
ENSG00000133069.17	chr1	+	3	0.66845	0.513201	0.679606
ENSG00000173163.10	chr2	+	2	0.422799	0.516222	0.683129
ENSG00000197530.12	chr1	+	2	0.420054	0.517586	0.684456
ENSG00000205220.12	chr16	-	2	0.419273	0.517975	0.684493
ENSG00000166451.14	chr16	+	2	0.41691	0.519156	0.685434
ENSG00000241058.4	chr10	-	2	0.4164	0.519411	0.685434
ENSG00000182796.14	chr12	+	2	0.413613	0.520811	0.686804
ENSG00000130429.15	chr7	+	2	0.410621	0.522321	0.688316
ENSG00000109332.20	chr4	-	3	0.648507	0.523497	0.689386
ENSG00000177666.17	chr11	+	2	0.407037	0.524142	0.689541
ENSG00000105426.17	chr19	-	4	0.747341	0.524342	0.689541
ENSG00000108312.15	chr17	-	2	0.403242	0.52608	0.690511
ENSG00000136950.13	chr9	+	2	0.403112	0.526146	0.690511
ENSG00000269113.4	chr1	-	2	0.40268	0.526369	0.690511
ENSG00000179833.4	chr2	-	2	0.401432	0.527009	0.690511
ENSG00000171680.23	chr1	-	2	0.401072	0.527194	0.690511
ENSG00000186104.11	chr11	-	2	0.400863	0.527302	0.690511
ENSG00000113657.13	chr5	-	2	0.399409	0.528051	0.690511
ENSG00000008324.12	chr3	+	2	0.399388	0.528062	0.690511
ENSG00000099968.18	chr22	+	3	0.639225	0.52836	0.690511
ENSG00000175029.17	chr10	-	2	0.393535	0.531097	0.693611
ENSG00000132170.23	chr3	+	2	0.392805	0.531478	0.693631
ENSG00000133678.14	chr10	+	2	0.391995	0.531901	0.693705
ENSG00000156650.14	chr10	+	2	0.389728	0.533089	0.694537
ENSG00000141012.13	chr16	-	2	0.389379	0.533272	0.694537
ENSG00000167641.11	chr19	-	2	0.384152	0.536031	0.69765
ENSG00000226688.7	chr10	-	2	0.382618	0.536845	0.697848
ENSG00000113758.13	chr5	-	2	0.382479	0.536919	0.697848
ENSG00000143740.15	chr1	+	3	0.617987	0.539657	0.700925
ENSG00000122786.20	chr7	+	4	0.718785	0.541167	0.702406
ENSG00000120833.14	chr12	+	4	0.717812	0.541748	0.702592
ENSG00000100599.16	chr14	+	2	0.372911	0.542052	0.702592
ENSG00000074266.22	chr11	+	2	0.371136	0.543014	0.703357
ENSG00000006194.10	chr16	+	2	0.369243	0.544044	0.704043
ENSG00000089157.16	chr12	-	2	0.368798	0.544286	0.704043
ENSG00000129353.15	chr19	+	2	0.367739	0.544865	0.70431
ENSG00000162458.13	chr1	+	2	0.364121	0.546848	0.706392
ENSG00000004478.8	chr12	+	2	0.362914	0.547513	0.706401
ENSG00000131149.19	chr16	+	2	0.361887	0.54808	0.706401
ENSG00000051523.11	chr16	-	2	0.361761	0.548149	0.706401
ENSG00000168646.13	chr17	-	2	0.361325	0.54839	0.706401
ENSG00000173171.15	chr1	+	2	0.360731	0.548719	0.706401
ENSG00000152217.20	chr18	+	2	0.35975	0.549262	0.706621
ENSG00000012223.13	chr3	-	2	0.357428	0.550553	0.707749
ENSG00000135679.25	chr12	+	2	0.356497	0.551072	0.707749
ENSG00000186635.15	chr11	-	3	0.596634	0.55126	0.707749
ENSG00000172493.22	chr4	+	3	0.59513	0.552087	0.708331
ENSG00000105855.10	chr7	+	2	0.353249	0.55289	0.70853
ENSG00000160691.19	chr1	-	2	0.352469	0.553328	0.70853
ENSG00000187954.13	chr8	-	2	0.352407	0.553363	0.70853
ENSG00000118689.15	chr6	+	2	0.351368	0.553949	0.7088
ENSG00000189171.14	chr1	-	2	0.348028	0.555837	0.710737
ENSG00000155096.14	chr8	-	2	0.344107	0.55807	0.71311
ENSG00000196526.10	chr4	-	2	0.339261	0.560852	0.716183
ENSG00000126456.16	chr19	-	2	0.337275	0.562001	0.71682
ENSG00000251247.11	chr19	+	2	0.33709	0.562108	0.71682
ENSG00000067064.12	chr10	-	2	0.335454	0.563057	0.717548
ENSG00000170558.10	chr18	-	2	0.333806	0.564018	0.717853
ENSG00000167740.10	chr17	+	2	0.332474	0.564796	0.717853
ENSG00000168734.14	chr20	+	2	0.332117	0.565004	0.717853
ENSG00000112936.19	chr5	+	4	0.67878	0.565398	0.717853
ENSG00000027001.10	chr13	-	2	0.331304	0.56548	0.717853
ENSG00000196562.14	chr20	-	2	0.331152	0.56557	0.717853
ENSG00000100897.18	chr14	+	2	0.330458	0.565977	0.717889
ENSG00000270647.6	chr17	+	2	0.328927	0.566877	0.71816
ENSG00000146147.15	chr6	+	2	0.328807	0.566948	0.71816
ENSG00000081923.15	chr18	-	2	0.325239	0.569058	0.720251
ENSG00000104853.16	chr19	+	2	0.324732	0.569359	0.720251
ENSG00000128487.18	chr17	+	2	0.323969	0.569813	0.720303
ENSG00000107897.20	chr10	-	2	0.323385	0.570161	0.720303
ENSG00000105974.13	chr7	+	2	0.321843	0.571081	0.720985
ENSG00000243156.9	chr22	-	2	0.319615	0.572415	0.722189
ENSG00000092929.12	chr17	-	2	0.318522	0.573073	0.722537
ENSG00000105711.13	chr19	+	2	0.316761	0.574134	0.723277
ENSG00000145431.11	chr4	-	2	0.316283	0.574423	0.723277
ENSG00000109670.16	chr4	-	3	0.552097	0.576277	0.725077
ENSG00000172354.10	chr7	+	2	0.312666	0.576618	0.725077
ENSG00000156508.19	chr6	-	3	0.549945	0.577514	0.725723
ENSG00000124313.18	chrX	-	2	0.307779	0.57961	0.727873
ENSG00000169519.21	chr11	+	2	0.306365	0.580481	0.728485
ENSG00000106348.18	chr7	-	2	0.305369	0.581097	0.728502
ENSG00000159720.12	chr16	-	2	0.305099	0.581264	0.728502
ENSG00000182177.14	chr2	-	2	0.303965	0.581967	0.728901
ENSG00000092969.12	chr1	+	2	0.302331	0.582984	0.729692
ENSG00000198589.14	chr4	-	2	0.300297	0.584252	0.730517
ENSG00000156299.13	chr21	-	2	0.300038	0.584414	0.730517
ENSG00000136160.17	chr13	-	2	0.298764	0.585212	0.730755
ENSG00000112576.13	chr6	-	2	0.298504	0.585375	0.730755
ENSG00000101639.18	chr18	+	2	0.29478	0.587723	0.733203
ENSG00000135185.12	chr7	-	2	0.292045	0.58946	0.734587
ENSG00000177565.18	chr3	-	2	0.29177	0.589635	0.734587
ENSG00000167291.16	chr17	-	2	0.291204	0.589996	0.734587
ENSG00000113575.10	chr5	-	2	0.290272	0.590591	0.734845
ENSG00000161958.11	chr17	+	3	0.52594	0.591499	0.735492
ENSG00000197971.16	chr18	-	3	0.524359	0.592432	0.73603
ENSG00000151503.13	chr11	-	2	0.286488	0.593021	0.73603
ENSG00000172889.16	chr9	+	3	0.523079	0.593188	0.73603
ENSG00000123562.18	chrX	-	2	0.285768	0.593485	0.73603
ENSG00000041982.16	chr9	-	2	0.281991	0.595938	0.738589
ENSG00000136848.17	chr9	+	4	0.627182	0.59776	0.740363
ENSG00000213722.10	chr6	-	2	0.277764	0.598702	0.741045
ENSG00000138867.17	chr22	-	2	0.27555	0.600162	0.74217
ENSG00000118473.22	chr1	+	2	0.275198	0.600394	0.74217
ENSG00000078304.19	chr14	+	3	0.509128	0.601495	0.743046
ENSG00000240771.8	chr12	+	2	0.272444	0.602222	0.743349
ENSG00000166402.9	chr11	+	2	0.271989	0.602525	0.743349
ENSG00000113594.10	chr5	-	2	0.269785	0.603998	0.744682
ENSG00000130255.13	chr19	+	2	0.268276	0.605011	0.745446
ENSG00000130695.16	chr1	+	2	0.266795	0.606009	0.74619
ENSG00000076864.19	chr1	-	2	0.265374	0.606969	0.746888
ENSG00000115677.17	chr2	-	5	0.677025	0.608107	0.747727
ENSG00000198695.2	chrM	-	2	0.26321	0.60844	0.747727
ENSG00000071655.18	chr19	-	2	0.261107	0.609873	0.749001
ENSG00000068028.17	chr3	-	2	0.258185	0.611879	0.750978
ENSG00000233237.8	chr6	-	2	0.252575	0.615771	0.755221
ENSG00000019144.19	chr11	+	4	0.598715	0.616133	0.755221
ENSG00000143799.14	chr1	-	2	0.249392	0.618003	0.75667
ENSG00000157540.22	chr21	+	2	0.24885	0.618384	0.75667
ENSG00000143353.12	chr1	+	2	0.248668	0.618513	0.75667
ENSG00000136100.14	chr13	-	2	0.246127	0.620311	0.757895
ENSG00000171385.10	chr1	-	2	0.246038	0.620374	0.757895
ENSG00000083312.18	chr5	+	2	0.245559	0.620714	0.757895
ENSG00000224318.6	chr3	-	2	0.242826	0.622667	0.759789
ENSG00000164850.15	chr7	+	2	0.240562	0.624289	0.761184
ENSG00000136925.15	chr9	-	2	0.239976	0.624712	0.761184
ENSG00000100138.15	chr22	-	3	0.470247	0.62527	0.761184
ENSG00000055609.20	chr7	-	2	0.238704	0.62563	0.761184
ENSG00000115902.11	chr2	+	2	0.238445	0.625818	0.761184
ENSG00000160877.6	chr19	+	2	0.236451	0.627265	0.762358
ENSG00000215386.13	chr21	+	3	0.466536	0.627588	0.762358
ENSG00000104976.12	chr19	+	2	0.234691	0.628549	0.762723
ENSG00000250722.6	chr5	-	2	0.234494	0.628693	0.762723
ENSG00000204217.15	chr2	+	2	0.233827	0.629182	0.762827
ENSG00000134758.14	chr18	+	2	0.229459	0.632401	0.766241
ENSG00000176209.12	chr8	+	2	0.228793	0.632896	0.76635
ENSG00000017260.20	chr3	+	2	0.226282	0.634767	0.768125
ENSG00000154309.9	chr1	+	2	0.223112	0.637147	0.770513
ENSG00000171408.14	chr6	+	2	0.22229	0.637768	0.770772
ENSG00000110429.14	chr11	-	2	0.22051	0.639116	0.771711
ENSG00000147065.17	chrX	+	2	0.219745	0.639698	0.771711
ENSG00000106565.18	chr7	-	2	0.219393	0.639966	0.771711
ENSG00000105204.14	chr19	-	2	0.219121	0.640174	0.771711
ENSG00000105810.10	chr7	-	2	0.218584	0.640584	0.771714
ENSG00000181722.17	chr3	-	3	0.442955	0.642521	0.773556
ENSG00000107968.10	chr10	+	2	0.210914	0.646505	0.777764
ENSG00000102265.12	chrX	+	3	0.435845	0.647093	0.777764
ENSG00000068383.19	chr10	+	2	0.209965	0.647247	0.777764
ENSG00000186352.9	chr4	+	2	0.20896	0.648035	0.777942
ENSG00000187288.12	chr3	-	2	0.208731	0.648217	0.777942
ENSG00000115290.10	chr2	-	2	0.202785	0.652926	0.782639
ENSG00000150938.10	chr2	+	2	0.201898	0.653635	0.782639
ENSG00000175866.15	chr17	+	2	0.201719	0.653779	0.782639
ENSG00000147573.17	chr8	+	2	0.201715	0.653782	0.782639
ENSG00000163694.15	chr4	-	2	0.200302	0.654917	0.783503
ENSG00000077009.13	chr19	+	3	0.423016	0.655426	0.783617
ENSG00000082293.13	chr6	+	2	0.197593	0.657107	0.784652
ENSG00000272288.6	chr6	+	2	0.197577	0.657121	0.784652
ENSG00000148053.17	chr9	+	2	0.196231	0.658216	0.784996
ENSG00000055118.16	chr7	-	2	0.196205	0.658237	0.784996
ENSG00000188643.11	chr1	-	2	0.194921	0.659286	0.785753
ENSG00000275832.5	chr17	+	3	0.414498	0.661018	0.787322
ENSG00000260549.2	chr16	+	2	0.19171	0.661927	0.787909
ENSG00000116584.20	chr1	-	2	0.190572	0.662869	0.788164
ENSG00000082397.18	chr18	-	2	0.190265	0.663124	0.788164
ENSG00000164318.18	chr5	+	2	0.189946	0.663389	0.788164
ENSG00000171033.13	chr8	+	2	0.188724	0.664408	0.788539
ENSG00000153048.11	chr16	-	2	0.188568	0.664537	0.788539
ENSG00000089693.11	chr12	-	4	0.523677	0.666212	0.790032
ENSG00000077150.20	chr10	+	2	0.184339	0.668091	0.791765
ENSG00000144366.16	chr2	+	2	0.183448	0.668846	0.792164
ENSG00000067182.8	chr12	-	2	0.182099	0.669993	0.793027
ENSG00000139687.16	chr13	+	2	0.180911	0.671007	0.793053
ENSG00000142871.18	chr1	+	2	0.17982	0.671945	0.793053
ENSG00000182667.14	chr11	+	2	0.179758	0.671995	0.793053
ENSG00000250644.3	chr11	-	2	0.179634	0.672102	0.793053
ENSG00000175538.11	chr11	-	2	0.179628	0.672107	0.793053
ENSG00000171853.16	chr2	+	3	0.39663	0.672906	0.793501
ENSG00000083720.13	chr5	-	2	0.177954	0.673549	0.793766
ENSG00000109686.19	chr4	-	3	0.392713	0.67554	0.795618
ENSG00000062716.13	chr17	+	2	0.172871	0.677979	0.797575
ENSG00000182871.16	chr21	+	2	0.172796	0.678044	0.797575
ENSG00000065320.9	chr17	+	2	0.172229	0.678545	0.797669
ENSG00000120896.13	chr8	+	3	0.378161	0.685419	0.805251
ENSG00000065054.14	chr16	+	3	0.375967	0.686921	0.806515
ENSG00000130294.18	chr2	-	2	0.155344	0.693863	0.813724
ENSG00000140199.13	chr15	-	2	0.155282	0.693919	0.813724
ENSG00000110237.5	chr11	+	2	0.154401	0.694745	0.814085
ENSG00000119139.21	chr9	+	3	0.36301	0.695859	0.814085
ENSG00000106608.17	chr7	-	2	0.153141	0.69593	0.814085
ENSG00000188343.13	chr8	+	2	0.153125	0.695946	0.814085
ENSG00000133878.9	chr8	-	2	0.151511	0.697472	0.815367
ENSG00000162909.18	chr1	+	2	0.149486	0.699401	0.817118
ENSG00000077044.11	chr2	+	2	0.147606	0.701204	0.81872
ENSG00000008441.18	chr19	+	2	0.145676	0.70307	0.820072
ENSG00000104805.16	chr19	+	3	0.352399	0.703266	0.820072
ENSG00000126246.10	chr19	-	2	0.144877	0.703847	0.820072
ENSG00000116044.16	chr2	-	2	0.144624	0.704093	0.820072
ENSG00000163820.15	chr3	-	2	0.142152	0.706514	0.822386
ENSG00000137106.18	chr9	+	2	0.140899	0.707751	0.822642
ENSG00000157985.19	chr2	+	2	0.140794	0.707854	0.822642
ENSG00000141971.13	chr19	+	2	0.14061	0.708036	0.822642
ENSG00000096696.14	chr6	+	2	0.137913	0.710722	0.825078
ENSG00000102575.13	chr19	-	2	0.13713	0.711508	0.825078
ENSG00000159131.17	chr21	-	2	0.137086	0.711551	0.825078
ENSG00000099875.16	chr19	-	2	0.136764	0.711875	0.825078
ENSG00000196507.11	chrX	+	2	0.133426	0.715257	0.828485
ENSG00000103034.14	chr16	+	4	0.452457	0.715688	0.828485
ENSG00000136986.10	chr8	-	2	0.132252	0.716458	0.828492
ENSG00000100605.17	chr14	-	2	0.132144	0.716569	0.828492
ENSG00000250159.7	chr5	-	2	0.131288	0.717448	0.828705
ENSG00000167522.16	chr16	-	2	0.130785	0.717966	0.828705
ENSG00000275915.1	chr1	+	2	0.130651	0.718105	0.828705
ENSG00000115904.14	chr2	-	2	0.130266	0.718503	0.828705
ENSG00000170619.10	chr8	-	2	0.128947	0.71987	0.829778
ENSG00000184347.15	chr5	-	2	0.1284	0.720443	0.829932
ENSG00000196440.11	chrX	+	2	0.127544	0.721334	0.830455
ENSG00000225733.6	chr3	-	2	0.126465	0.722466	0.830824
ENSG00000079277.22	chr1	-	2	0.126403	0.722532	0.830824
ENSG00000123154.12	chr19	+	3	0.323716	0.723687	0.831648
ENSG00000160072.20	chr1	+	2	0.121681	0.727552	0.834827
ENSG00000150593.18	chr10	+	2	0.121321	0.727939	0.834827
ENSG00000196605.7	chr19	-	2	0.121315	0.727945	0.834827
ENSG00000038274.17	chr5	+	2	0.120704	0.728604	0.834827
ENSG00000196504.19	chr2	-	2	0.120656	0.728656	0.834827
ENSG00000172613.8	chr11	+	2	0.117364	0.732239	0.837875
ENSG00000160194.18	chr21	+	2	0.117192	0.732427	0.837875
ENSG00000159403.18	chr12	-	2	0.116995	0.732643	0.837875
ENSG00000106617.15	chr7	-	4	0.427164	0.733631	0.838415
ENSG00000179222.18	chrX	+	2	0.115763	0.734001	0.838415
ENSG00000176834.14	chr12	-	2	0.114971	0.734878	0.838912
ENSG00000130592.17	chr11	+	3	0.304375	0.737793	0.841732
ENSG00000163520.14	chr3	+	2	0.10994	0.740528	0.844345
ENSG00000172845.17	chr2	-	3	0.299694	0.741248	0.844657
ENSG00000198276.16	chr20	-	2	0.105874	0.745201	0.848651
ENSG00000093183.14	chr3	-	2	0.105113	0.746086	0.849149
ENSG00000158092.7	chr3	+	2	0.102181	0.749531	0.852388
ENSG00000092931.11	chr17	+	2	0.101927	0.749832	0.852388
ENSG00000176170.14	chr17	+	2	0.100732	0.751255	0.853494
ENSG00000151835.16	chr13	-	2	0.099596	0.752614	0.854526
ENSG00000167081.18	chr9	+	2	0.0990277	0.753298	0.85479
ENSG00000164116.17	chr4	+	2	0.0973906	0.755279	0.855516
ENSG00000081277.13	chr1	+	2	0.0970563	0.755686	0.855516
ENSG00000079435.10	chr19	-	2	0.0966688	0.75616	0.855516
ENSG00000164830.19	chr8	+	3	0.279279	0.756509	0.855516
ENSG00000115159.16	chr2	+	2	0.0962971	0.756613	0.855516
ENSG00000017427.17	chr12	-	2	0.0962707	0.756646	0.855516
ENSG00000125733.18	chr19	+	2	0.0955107	0.757577	0.856034
ENSG00000170290.4	chr11	-	2	0.0951101	0.758072	0.856034
ENSG00000204580.13	chr6	+	2	0.0947946	0.758459	0.856034
ENSG00000187773.9	chr18	-	2	0.0942297	0.759158	0.856312
ENSG00000109016.17	chr17	+	2	0.0912431	0.762888	0.860008
ENSG00000078596.11	chrX	-	2	0.0892681	0.765392	0.862317
ENSG00000105647.19	chr19	+	3	0.26658	0.766161	0.862671
ENSG00000124181.14	chr20	+	2	0.087444	0.767731	0.863925
ENSG00000133121.21	chr13	-	3	0.261499	0.770058	0.86601
ENSG00000107104.20	chr9	+	2	0.085313	0.770498	0.86601
ENSG00000161011.20	chr5	+	3	0.259695	0.771446	0.866562
ENSG00000075420.13	chr3	+	2	0.0816697	0.775316	0.870393
ENSG00000165410.15	chr14	-	2	0.0813036	0.775807	0.870429
ENSG00000087095.13	chr17	+	2	0.0805663	0.776798	0.870627
ENSG00000101040.19	chr20	-	2	0.0804892	0.776902	0.870627
ENSG00000141540.11	chr17	+	2	0.0789309	0.779016	0.872479
ENSG00000168556.7	chr4	+	2	0.0777838	0.780585	0.873721
ENSG00000166741.8	chr11	+	2	0.0767835	0.781966	0.87475
ENSG00000198053.12	chr20	+	2	0.0760312	0.783008	0.875399
ENSG00000111846.19	chr6	+	3	0.240854	0.786095	0.878265
ENSG00000138772.13	chr4	+	2	0.0735442	0.786499	0.878265
ENSG00000072682.20	chr5	-	2	0.0713584	0.789619	0.88123
ENSG00000160392.13	chr19	-	2	0.0706976	0.790573	0.881703
ENSG00000054654.19	chr14	+	4	0.346834	0.791465	0.881703
ENSG00000167658.16	chr19	-	3	0.233652	0.791769	0.881703
ENSG00000170638.10	chr22	+	2	0.0695754	0.792203	0.881703
ENSG00000136237.19	chr7	-	2	0.0694614	0.792369	0.881703
ENSG00000126001.16	chr20	+	2	0.0691221	0.792865	0.881737
ENSG00000130176.8	chr19	+	3	0.231191	0.793718	0.882168
ENSG00000168958.20	chr2	+	2	0.0674198	0.795374	0.882705
ENSG00000162599.17	chr1	+	2	0.0674021	0.7954	0.882705
ENSG00000168824.14	chr4	+	2	0.0672684	0.795599	0.882705
ENSG00000154262.13	chr17	-	2	0.0648025	0.799298	0.88629
ENSG00000154305.18	chr1	+	2	0.0638494	0.800748	0.886852
ENSG00000092820.18	chr6	-	2	0.0638493	0.800748	0.886852
ENSG00000180155.20	chr8	-	2	0.0635481	0.801209	0.886852
ENSG00000137502.10	chr11	-	2	0.0615178	0.804344	0.889803
ENSG00000113448.19	chr5	-	2	0.060572	0.805824	0.890919
ENSG00000169499.15	chr8	+	2	0.0597011	0.807197	0.891917
ENSG00000100888.15	chr14	-	2	0.0588226	0.808593	0.892883
ENSG00000064932.16	chr19	-	3	0.212077	0.809013	0.892883
ENSG00000134769.22	chr18	+	3	0.21113	0.809779	0.893208
ENSG00000106992.19	chr9	-	2	0.0571318	0.811311	0.893735
ENSG00000179051.14	chr1	-	2	0.0568026	0.811845	0.893735
ENSG00000138735.16	chr4	-	2	0.0564106	0.812483	0.893735
ENSG00000069020.18	chr5	+	4	0.317577	0.812675	0.893735
ENSG00000095637.22	chr10	-	2	0.0561683	0.812878	0.893735
ENSG00000103496.15	chr16	+	2	0.0560412	0.813086	0.893735
ENSG00000134371.14	chr1	+	2	0.054101	0.816291	0.89673
ENSG00000151474.23	chr10	-	2	0.0538218	0.816757	0.89673
ENSG00000133065.11	chr1	-	2	0.0526208	0.818777	0.898427
ENSG00000104881.16	chr19	-	2	0.051904	0.819994	0.899241
ENSG00000128591.16	chr7	+	2	0.0509909	0.821558	0.900435
ENSG00000130940.15	chr1	-	2	0.0505228	0.822365	0.900684
ENSG00000174197.16	chr15	+	2	0.0503085	0.822736	0.900684
ENSG00000022840.16	chr12	+	3	0.193148	0.824454	0.901722
ENSG00000267082.1	chr19	+	2	0.0492178	0.824636	0.901722
ENSG00000179820.16	chr19	+	2	0.0486809	0.825579	0.902233
ENSG00000133619.17	chr7	+	2	0.0481602	0.8265	0.902719
ENSG00000271952.2	chr2	+	2	0.0476672	0.827376	0.903155
ENSG00000121964.14	chr2	-	2	0.0464519	0.829556	0.905014
ENSG00000018625.15	chr1	+	2	0.045599	0.831104	0.906026
ENSG00000136068.15	chr3	+	2	0.0454152	0.83144	0.906026
ENSG00000140650.12	chr16	+	2	0.044781	0.832603	0.906772
ENSG00000107372.13	chr9	-	2	0.0440334	0.833986	0.907253
ENSG00000139117.14	chr12	-	2	0.0437962	0.834427	0.907253
ENSG00000143702.16	chr1	-	2	0.0437671	0.834481	0.907253
ENSG00000132530.17	chr17	+	2	0.0431378	0.835658	0.907614
ENSG00000058262.10	chr3	+	2	0.0430775	0.835771	0.907614
ENSG00000205090.9	chr1	-	2	0.042761	0.836367	0.907741
ENSG00000126804.13	chr14	+	2	0.0415353	0.838696	0.909748
ENSG00000023734.11	chr12	+	2	0.0404074	0.840872	0.911075
ENSG00000088992.18	chr12	-	2	0.040091	0.841488	0.911075
ENSG00000241878.11	chr22	-	2	0.0399536	0.841756	0.911075
ENSG00000125107.19	chr16	-	2	0.0397744	0.842106	0.911075
ENSG00000178104.19	chr1	+	3	0.171149	0.842771	0.911075
ENSG00000010278.15	chr12	+	2	0.0394187	0.842805	0.911075
ENSG00000173402.12	chr3	+	2	0.0388009	0.844026	0.91166
ENSG00000066697.15	chr9	+	2	0.0385633	0.844498	0.91166
ENSG00000198420.10	chr7	-	2	0.0384169	0.844789	0.91166
ENSG00000151967.18	chr3	+	2	0.0367952	0.848059	0.914669
ENSG00000156030.13	chr14	-	2	0.035359	0.851019	0.917207
ENSG00000177548.13	chr16	-	2	0.0351852	0.851381	0.917207
ENSG00000175699.15	chr14	+	2	0.0344252	0.852976	0.918403
ENSG00000183098.11	chr13	+	2	0.0340686	0.853731	0.918694
ENSG00000196924.19	chrX	-	3	0.156505	0.855191	0.919743
ENSG00000104205.16	chr8	+	2	0.0329702	0.856082	0.920179
ENSG00000188938.17	chr9	-	3	0.151935	0.859105	0.922905
ENSG00000242125.3	chr1	+	2	0.0311622	0.860041	0.923387
ENSG00000186815.13	chr12	+	2	0.0294044	0.864006	0.927119
ENSG00000072195.15	chr2	+	4	0.243129	0.866217	0.928965
ENSG00000156414.19	chr14	+	2	0.0281583	0.866891	0.929162
ENSG00000182979.18	chr14	+	3	0.140271	0.869175	0.931067
ENSG00000115459.18	chr2	+	2	0.0269923	0.869651	0.931067
ENSG00000136167.15	chr13	-	2	0.0267177	0.87031	0.931246
ENSG00000166483.12	chr11	+	2	0.0264484	0.870959	0.931415
ENSG00000205189.12	chr8	+	2	0.0255823	0.873071	0.933147
ENSG00000075914.13	chr3	+	2	0.0251292	0.874191	0.933817
ENSG00000117419.16	chr1	-	2	0.024889	0.874789	0.933929
ENSG00000015153.15	chr12	-	2	0.0245496	0.875638	0.934148
ENSG00000150630.4	chr4	-	2	0.0242486	0.876397	0.934148
ENSG00000242259.9	chr22	-	2	0.0242187	0.876473	0.934148
ENSG00000178860.9	chr8	-	2	0.023428	0.87849	0.935765
ENSG00000131018.24	chr6	-	4	0.225046	0.878977	0.935765
ENSG00000102317.18	chrX	+	2	0.0229427	0.879745	0.936057
ENSG00000168283.14	chr10	+	2	0.022714	0.880341	0.936165
ENSG00000112759.19	chr6	+	4	0.221929	0.88116	0.936511
ENSG00000151135.10	chr12	+	2	0.0218605	0.882594	0.937509
ENSG00000059691.12	chr4	-	3	0.123764	0.88363	0.938073
ENSG00000123636.18	chr2	-	2	0.0212936	0.884116	0.938073
ENSG00000163092.21	chr2	+	2	0.0211086	0.884617	0.93808
ENSG00000110665.12	chr11	-	2	0.0206697	0.885814	0.938523
ENSG00000167705.12	chr17	-	2	0.0205928	0.886025	0.938523
ENSG00000172262.11	chr5	+	3	0.117337	0.889323	0.94149
ENSG00000135778.12	chr1	+	2	0.0189085	0.890755	0.942479
ENSG00000112541.18	chr6	-	4	0.207189	0.891415	0.942652
ENSG00000158793.14	chr1	+	2	0.0182446	0.892678	0.943461
ENSG00000120616.16	chr10	-	2	0.0178619	0.893803	0.944096
ENSG00000050405.13	chr12	-	2	0.0177021	0.894276	0.944096
ENSG00000060982.15	chr12	-	2	0.0174671	0.894976	0.944309
ENSG00000162512.16	chr1	-	2	0.0172826	0.895529	0.944367
ENSG00000186020.13	chr19	-	2	0.016788	0.897026	0.94542
ENSG00000109099.16	chr17	-	4	0.197657	0.897976	0.945683
ENSG00000198218.11	chr3	-	2	0.0163814	0.898274	0.945683
ENSG00000184939.16	chr16	+	2	0.0159308	0.899675	0.946061
ENSG00000137764.20	chr15	+	2	0.0158044	0.900072	0.946061
ENSG00000119912.18	chr10	-	2	0.015498	0.90104	0.946061
ENSG00000088986.11	chr12	+	2	0.0153816	0.901411	0.946061
ENSG00000197879.17	chr17	-	3	0.103731	0.901498	0.946061
ENSG00000163412.13	chr3	-	2	0.015285	0.901719	0.946061
ENSG00000105438.9	chr19	-	2	0.0151576	0.902127	0.946061
ENSG00000144118.14	chr2	+	2	0.014892	0.902984	0.946435
ENSG00000181409.14	chr17	-	2	0.0143786	0.904663	0.947671
ENSG00000166508.18	chr7	-	2	0.0141482	0.905426	0.947759
ENSG00000106069.23	chr7	+	2	0.0139057	0.906237	0.947759
ENSG00000108953.17	chr17	-	2	0.0139024	0.906248	0.947759
ENSG00000085563.15	chr7	-	2	0.0134789	0.90768	0.948598
ENSG00000144711.16	chr3	-	3	0.0964828	0.908051	0.948598
ENSG00000223695.1	chr22	+	2	0.0130346	0.909208	0.949283
ENSG00000172403.11	chr4	+	2	0.0127938	0.910047	0.949636
ENSG00000128739.23	chr15	+	3	0.0927891	0.91141	0.950076
ENSG00000170175.11	chr17	+	3	0.0922157	0.911932	0.950076
ENSG00000099917.17	chr22	+	3	0.0921715	0.911972	0.950076
ENSG00000115998.8	chr2	-	2	0.011563	0.914466	0.951687
ENSG00000128918.15	chr15	-	3	0.0892176	0.914669	0.951687
ENSG00000177963.14	chr11	+	2	0.0114113	0.915026	0.951687
ENSG00000152601.17	chr3	+	2	0.0102904	0.919292	0.9556
ENSG00000196923.14	chr5	-	2	0.00997886	0.920519	0.955836
ENSG00000164050.13	chr3	-	2	0.00996149	0.920588	0.955836
ENSG00000164591.14	chr5	+	2	0.00985001	0.921032	0.955836
ENSG00000057657.17	chr6	+	2	0.00972312	0.921541	0.95584
ENSG00000182963.11	chr17	-	2	0.0091335	0.92395	0.957814
ENSG00000101972.19	chrX	+	2	0.00899906	0.92451	0.957833
ENSG00000172831.14	chr16	+	2	0.00886229	0.925084	0.957833
ENSG00000172992.12	chr17	-	2	0.00876767	0.925484	0.957833
ENSG00000170485.17	chr2	+	2	0.00851802	0.926549	0.958412
ENSG00000138606.19	chr15	-	2	0.00826259	0.927656	0.959033
ENSG00000157873.18	chr1	+	2	0.00775259	0.929918	0.960441
ENSG00000129521.15	chr14	-	2	0.00772755	0.930031	0.960441
ENSG00000250608.2	chr3	-	2	0.00716757	0.932607	0.962577
ENSG00000134897.14	chr13	+	2	0.00700528	0.933373	0.962843
ENSG00000274104.1	chr19	-	2	0.00653008	0.935667	0.963847
ENSG00000134138.20	chr15	-	4	0.138447	0.936997	0.963847
ENSG00000077092.19	chr3	+	2	0.00621321	0.937244	0.963847
ENSG00000134369.15	chr1	+	2	0.00618183	0.937403	0.963847
ENSG00000164951.16	chr8	+	2	0.00617724	0.937426	0.963847
ENSG00000168003.18	chr11	+	2	0.00610346	0.9378	0.963847
ENSG00000108306.13	chr17	-	2	0.00608247	0.937907	0.963847
ENSG00000107262.26	chr9	-	2	0.00591495	0.938766	0.964207
ENSG00000147140.17	chrX	+	2	0.00514088	0.942906	0.967725
ENSG00000053254.16	chr14	-	3	0.0584742	0.943212	0.967725
ENSG00000041880.15	chr3	+	2	0.00492604	0.94411	0.968121
ENSG00000128789.21	chr18	+	2	0.00479229	0.944872	0.968379
ENSG00000175274.19	chr11	-	2	0.00448384	0.946673	0.969646
ENSG00000168395.16	chr2	+	2	0.00440691	0.947132	0.969646
ENSG00000141068.14	chr17	+	2	0.00431136	0.947707	0.969711
ENSG00000134954.14	chr11	-	2	0.00412538	0.948846	0.970353
ENSG00000186439.14	chr6	-	2	0.00374706	0.951245	0.9715
ENSG00000173511.10	chr11	+	2	0.00373967	0.951293	0.9715
ENSG00000177169.10	chr12	+	2	0.00370703	0.951506	0.9715
ENSG00000171914.16	chr15	+	2	0.00359454	0.952246	0.971732
ENSG00000166025.18	chr11	+	2	0.00329676	0.954265	0.972139
ENSG00000136261.15	chr7	+	2	0.00327929	0.954386	0.972139
ENSG00000005302.19	chrX	+	2	0.00326642	0.954475	0.972139
ENSG00000132463.14	chr4	-	2	0.00323464	0.954697	0.972139
ENSG00000135424.18	chr12	-	2	0.00283314	0.957599	0.974571
ENSG00000164093.17	chr4	-	2	0.00272968	0.95838	0.974842
ENSG00000093144.19	chr6	-	2	0.00258448	0.959501	0.97517
ENSG00000165795.23	chr14	-	3	0.0408346	0.959993	0.97517
ENSG00000219607.4	chr6	+	2	0.00241928	0.960816	0.97517
ENSG00000048540.15	chr12	-	2	0.00240644	0.96092	0.97517
ENSG00000163798.13	chr2	+	2	0.00230518	0.96175	0.97517
ENSG00000267577.1	chr19	+	2	0.00228551	0.961914	0.97517
ENSG00000145990.11	chr6	-	2	0.00223876	0.962305	0.97517
ENSG00000158158.12	chr2	+	2	0.00203593	0.964052	0.976418
ENSG00000177685.17	chr11	+	2	0.00163728	0.96776	0.979651
ENSG00000106034.18	chr7	+	2	0.00155672	0.968563	0.97994
ENSG00000172572.7	chr12	+	2	0.00125503	0.971772	0.982661
ENSG00000167106.12	chr9	-	3	0.0263107	0.974035	0.984424
ENSG00000127914.19	chr7	+	2	0.000910534	0.975955	0.985839
ENSG00000211448.13	chr14	-	2	0.0007451	0.978248	0.986906
ENSG00000198431.16	chr12	+	4	0.0648904	0.978416	0.986906
ENSG00000183230.17	chr10	-	2	0.000718956	0.978633	0.986906
ENSG00000171604.12	chr5	+	2	0.000688276	0.979094	0.986906
ENSG00000084093.19	chr4	+	2	0.00063955	0.979847	0.987069
ENSG00000094916.16	chr12	-	2	0.000584379	0.980736	0.987069
ENSG00000087086.15	chr19	+	2	0.000566257	0.981037	0.987069
ENSG00000159176.14	chr1	-	2	0.000548303	0.98134	0.987069
ENSG00000114544.17	chr3	-	2	0.000495017	0.98227	0.98748
ENSG00000160180.16	chr21	-	2	0.000433898	0.9834	0.988093
ENSG00000170776.22	chr15	+	4	0.052124	0.984282	0.988455
ENSG00000166398.14	chr19	+	2	0.000314503	0.985867	0.989522
ENSG00000147130.14	chrX	-	2	0.000258348	0.987191	0.990326
ENSG00000065427.15	chr16	-	2	0.000222731	0.988106	0.990402
ENSG00000112096.19	chr6	-	3	0.0117574	0.988312	0.990402
ENSG00000125741.5	chr19	-	2	5.69532e-05	0.993985	0.995562
ENSG00000180035.13	chr16	+	2	4.69322e-05	0.99454	0.995591
ENSG00000130558.20	chr9	+	2	3.28716e-05	0.995431	0.995956
ENSG00000182809.11	chr14	+	3	0.000519965	0.99948	0.99948

## Sheet: CAGE.DPU.Healthy
geneId	cluster_chr	cluster_strand	NExons	gene.F	P.Value	FDR
ENSG00000129824.16	chrY	+	2	2669.54	3.7445e-99	7.17821e-96
ENSG00000170525.21	chr10	+	3	32.0793	5.36823e-13	5.14545e-10
ENSG00000132510.11	chr17	+	3	27.1275	2.73403e-11	1.74705e-08
ENSG00000213853.10	chr16	-	2	48.0977	1.05204e-10	5.04189e-08
ENSG00000100097.12	chr22	+	3	22.2209	1.52607e-09	5.85096e-07
ENSG00000173113.7	chr11	-	2	39.9559	2.6712e-09	8.53447e-07
ENSG00000156256.15	chr21	+	2	38.894	4.16824e-09	1.00784e-06
ENSG00000133313.15	chr18	+	2	38.8422	4.20591e-09	1.00784e-06
ENSG00000168309.18	chr3	-	3	20.229	8.18448e-09	1.62223e-06
ENSG00000112096.19	chr6	-	3	20.1975	8.46234e-09	1.62223e-06
ENSG00000228474.6	chr2	-	2	35.7072	1.53387e-08	2.46935e-06
ENSG00000135077.9	chr5	-	3	19.4819	1.54576e-08	2.46935e-06
ENSG00000152061.23	chr1	+	3	19.2253	1.92563e-08	2.83957e-06
ENSG00000110700.7	chr11	-	2	34.3371	2.72058e-08	3.72525e-06
ENSG00000099622.14	chr19	+	3	18.5605	3.40481e-08	4.35134e-06
ENSG00000140416.23	chr15	+	7	7.67263	6.4746e-08	7.75738e-06
ENSG00000111716.14	chr12	-	3	17.3901	9.35984e-08	1.04019e-05
ENSG00000184007.22	chr1	-	3	17.341	9.76708e-08	1.04019e-05
ENSG00000184060.11	chr17	+	2	30.5482	1.36094e-07	1.33918e-05
ENSG00000156467.10	chr8	-	3	16.9292	1.39716e-07	1.33918e-05
ENSG00000155657.28	chr2	-	6	8.32126	1.54633e-07	1.38449e-05
ENSG00000162241.12	chr11	-	2	30.1884	1.58888e-07	1.38449e-05
ENSG00000108691.9	chr17	+	2	29.7381	1.94659e-07	1.57658e-05
ENSG00000134294.14	chr12	-	2	29.6858	1.97381e-07	1.57658e-05
ENSG00000102316.17	chrX	+	3	16.4295	2.15978e-07	1.65612e-05
ENSG00000071082.11	chr2	+	2	28.5475	3.23448e-07	2.38481e-05
ENSG00000078114.19	chr10	-	7	7.00559	3.49423e-07	2.4809e-05
ENSG00000198755.11	chr6	+	2	28.019	4.07335e-07	2.78879e-05
ENSG00000140264.21	chr15	+	3	15.5627	4.61883e-07	3.05321e-05
ENSG00000184489.13	chr8	+	4	11.2201	5.32311e-07	3.40147e-05
ENSG00000134321.13	chr2	+	2	27.1169	6.09395e-07	3.76842e-05
ENSG00000023171.18	chr11	+	3	14.7196	9.72401e-07	5.82529e-05
ENSG00000109971.14	chr11	-	3	14.6688	1.01712e-06	5.90857e-05
ENSG00000142676.14	chr1	+	2	25.8596	1.05402e-06	5.94279e-05
ENSG00000196502.12	chr16	-	2	25.3352	1.3302e-06	7.2149e-05
ENSG00000107798.18	chr10	-	2	25.2938	1.35491e-06	7.2149e-05
ENSG00000105373.19	chr19	+	3	14.3004	1.41008e-06	7.30574e-05
ENSG00000105193.9	chr19	-	2	25.1185	1.46497e-06	7.34178e-05
ENSG00000187079.20	chr11	+	2	25.075	1.49363e-06	7.34178e-05
ENSG00000132002.9	chr19	-	2	24.9913	1.55927e-06	7.39583e-05
ENSG00000077522.14	chr1	+	3	14.1711	1.58179e-06	7.39583e-05
ENSG00000211445.12	chr5	+	3	14.0883	1.70283e-06	7.7722e-05
ENSG00000182899.17	chr3	+	2	24.0183	2.39644e-06	0.000105287
ENSG00000153774.9	chr16	-	2	23.9997	2.41659e-06	0.000105287
ENSG00000100906.11	chr14	-	2	23.8071	2.64117e-06	0.000112514
ENSG00000173598.14	chr12	+	2	23.6188	2.86809e-06	0.000117767
ENSG00000111912.20	chr6	+	4	9.92777	2.9206e-06	0.000117767
ENSG00000114062.22	chr15	-	2	23.5576	2.94879e-06	0.000117767
ENSG00000151150.22	chr10	-	4	9.83379	3.30723e-06	0.000129387
ENSG00000136436.15	chr17	+	3	13.1764	3.84503e-06	0.000147418
ENSG00000105220.17	chr19	+	3	13.0227	4.4133e-06	0.000165888
ENSG00000185437.14	chr21	+	3	12.92	4.84026e-06	0.000174848
ENSG00000136942.15	chr9	-	3	12.9096	4.88482e-06	0.000174848
ENSG00000167244.21	chr11	-	4	9.53308	4.92531e-06	0.000174848
ENSG00000095794.19	chr10	+	3	12.7793	5.49157e-06	0.000191406
ENSG00000170906.16	chr19	+	2	22.0202	5.91653e-06	0.000202535
ENSG00000135900.4	chr2	+	2	21.9209	6.21512e-06	0.000209024
ENSG00000151067.22	chr12	+	2	21.8034	6.53133e-06	0.000214681
ENSG00000261371.6	chr17	-	2	21.7781	6.6073e-06	0.000214681
ENSG00000136156.15	chr13	+	3	12.508	7.01108e-06	0.000224004
ENSG00000162819.12	chr1	+	2	21.4558	7.65549e-06	0.000240583
ENSG00000064225.12	chr3	+	2	21.3847	7.90876e-06	0.000243825
ENSG00000172348.15	chr6	-	2	21.3647	8.01302e-06	0.000243825
ENSG00000004799.8	chr7	-	3	12.0906	1.02467e-05	0.000306919
ENSG00000080503.24	chr9	+	4	8.79538	1.31224e-05	0.00038701
ENSG00000173918.15	chr17	+	5	7.18554	1.38978e-05	0.000401911
ENSG00000108669.16	chr17	-	3	11.7391	1.4047e-05	0.000401911
ENSG00000173812.11	chr17	+	2	20.0904	1.43447e-05	0.000404316
ENSG00000265972.6	chr1	-	2	20.0569	1.45687e-05	0.000404316
ENSG00000126267.11	chr19	+	2	20.0223	1.48031e-05	0.000404316
ENSG00000139112.11	chr12	+	3	11.6552	1.51577e-05	0.000404316
ENSG00000136560.14	chr2	+	2	19.9585	1.52467e-05	0.000404316
ENSG00000110955.9	chr12	-	3	11.6381	1.53965e-05	0.000404316
ENSG00000204257.15	chr6	-	2	19.7939	1.64906e-05	0.000427195
ENSG00000115053.17	chr2	-	3	11.518	1.71684e-05	0.000438823
ENSG00000132507.18	chr17	+	2	19.6273	1.77762e-05	0.000446332
ENSG00000003402.20	chr2	+	4	8.5542	1.8095e-05	0.000446332
ENSG00000163110.15	chr4	+	3	11.4431	1.83777e-05	0.000446332
ENSG00000131446.17	chr5	-	4	8.54186	1.83934e-05	0.000446332
ENSG00000132475.10	chr17	-	3	11.3773	1.95101e-05	0.000458946
ENSG00000113441.16	chr5	+	2	19.4028	1.97291e-05	0.000458946
ENSG00000131143.10	chr16	+	3	11.3547	1.99141e-05	0.000458946
ENSG00000149925.22	chr16	+	4	8.47697	2.00552e-05	0.000458946
ENSG00000117228.11	chr1	-	2	19.3621	2.01103e-05	0.000458946
ENSG00000141736.14	chr17	+	2	18.8216	2.58645e-05	0.000583321
ENSG00000154556.18	chr4	-	7	5.18638	3.38124e-05	0.000749248
ENSG00000106333.13	chr7	+	3	10.7678	3.40034e-05	0.000749248
ENSG00000224397.7	chr20	+	2	18.133	3.57117e-05	0.000774545
ENSG00000147684.10	chr8	+	2	18.1179	3.59596e-05	0.000774545
ENSG00000185022.12	chr22	+	2	17.5866	4.63377e-05	0.000986994
ENSG00000152795.18	chr4	-	2	17.5509	4.69592e-05	0.000989239
ENSG00000101210.13	chr20	-	3	10.3926	4.79327e-05	0.000998771
ENSG00000185201.17	chr11	+	2	17.153	5.66747e-05	0.00116823
ENSG00000063177.13	chr19	-	2	17.0194	6.03785e-05	0.00122579
ENSG00000166974.13	chr18	+	2	17.0066	6.07458e-05	0.00122579
ENSG00000143947.15	chr2	+	2	16.8856	6.43351e-05	0.00128469
ENSG00000172270.22	chr19	+	5	6.22731	7.34253e-05	0.0014511
ENSG00000197746.14	chr10	-	3	9.89395	7.57679e-05	0.00148211
ENSG00000170989.10	chr1	+	2	16.4429	7.94049e-05	0.00153317
ENSG00000125618.18	chr2	-	2	16.4278	7.99776e-05	0.00153317
ENSG00000084090.14	chr2	-	2	16.3321	8.3747e-05	0.00158139
ENSG00000142546.14	chr19	-	2	16.3213	8.41426e-05	0.00158139
ENSG00000124831.19	chr2	+	3	9.74414	8.69735e-05	0.00161655
ENSG00000114391.13	chr3	-	2	16.2215	8.82468e-05	0.00161655
ENSG00000113742.14	chr5	+	4	7.36601	8.85435e-05	0.00161655
ENSG00000114867.22	chr3	+	3	9.7118	8.96038e-05	0.00162048
ENSG00000131016.17	chr6	+	3	9.69215	9.14056e-05	0.00163761
ENSG00000237125.11	chr4	+	3	9.58651	0.000100575	0.00178521
ENSG00000109390.13	chr4	-	3	9.5117	0.000107763	0.00189356
ENSG00000145730.20	chr5	+	6	5.24186	0.000108655	0.00189356
ENSG00000182196.13	chr12	+	2	15.6321	0.000117001	0.00202064
ENSG00000123080.12	chr1	+	2	15.3619	0.000133216	0.00228014
ENSG00000143198.13	chr1	+	3	9.23392	0.000139297	0.00233614
ENSG00000079215.15	chr5	+	3	9.22754	0.000140122	0.00233614
ENSG00000166710.21	chr15	+	2	15.2405	0.000141232	0.00233614
ENSG00000008853.17	chr8	+	3	9.21801	0.000141363	0.00233614
ENSG00000072210.19	chr17	+	2	15.1558	0.000147111	0.00240369
ENSG00000131730.16	chr5	+	3	9.16873	0.000147958	0.00240369
ENSG00000108852.15	chr17	-	2	14.9662	0.000161194	0.00259672
ENSG00000127483.19	chr1	-	2	14.9048	0.000166049	0.00265264
ENSG00000173641.18	chr1	-	2	14.8481	0.000170778	0.00270563
ENSG00000115685.15	chr2	+	2	14.7308	0.000180619	0.00283808
ENSG00000198842.10	chr1	+	3	8.94324	0.00018233	0.00284047
ENSG00000185010.15	chrX	-	2	14.6943	0.000183839	0.00284047
ENSG00000082458.12	chrX	+	3	8.91469	0.000187223	0.00284047
ENSG00000108946.15	chr17	+	4	6.80607	0.000187644	0.00284047
ENSG00000142599.19	chr1	-	6	4.98152	0.000188179	0.00284047
ENSG00000100266.19	chr22	-	2	14.6143	0.000191101	0.00286204
ENSG00000105643.10	chr19	+	3	8.81933	0.000204542	0.00303959
ENSG00000132471.12	chr17	-	2	14.4477	0.000207166	0.0030549
ENSG00000117616.18	chr1	-	2	14.4307	0.000208888	0.00305678
ENSG00000140795.13	chr16	-	4	6.71347	0.000212473	0.00308568
ENSG00000174437.17	chr12	+	7	4.44114	0.000214213	0.00308757
ENSG00000135447.17	chr12	-	2	14.336	0.000218711	0.00312888
ENSG00000198715.13	chr1	-	2	14.246	0.000228488	0.00324197
ENSG00000197360.9	chr19	-	2	14.2324	0.000229999	0.00324197
ENSG00000105701.16	chr19	-	3	8.66808	0.000235391	0.00327201
ENSG00000130528.12	chr19	-	2	14.1834	0.000235543	0.00327201
ENSG00000203709.12	chr1	-	2	14.1449	0.00024	0.00327887
ENSG00000130175.10	chr19	+	2	14.1363	0.000241003	0.00327887
ENSG00000153406.14	chr16	-	2	14.1349	0.000241168	0.00327887
ENSG00000196482.18	chr1	-	5	5.53481	0.000244182	0.00328348
ENSG00000196352.16	chr1	+	2	14.1031	0.000244933	0.00328348
ENSG00000022267.19	chrX	+	5	5.5093	0.000255367	0.00338415
ENSG00000126883.17	chr9	+	2	13.9996	0.000257596	0.00338415
ENSG00000014641.21	chr2	+	2	13.9984	0.000257739	0.00338415
ENSG00000111639.8	chr12	-	2	13.97	0.00026134	0.00340809
ENSG00000149273.15	chr11	+	2	13.9553	0.000263218	0.00340939
ENSG00000062582.14	chr7	-	2	13.9287	0.000266652	0.00341989
ENSG00000109846.9	chr11	-	4	6.54164	0.00026763	0.00341989
ENSG00000161203.13	chr3	+	2	13.9078	0.000269381	0.00341989
ENSG00000101335.10	chr20	+	3	8.51386	0.000271709	0.00342676
ENSG00000185215.11	chr14	+	2	13.7276	0.000294673	0.00369208
ENSG00000087274.17	chr4	+	3	8.40437	0.000300841	0.00374488
ENSG00000178573.7	chr16	-	2	13.55	0.000320829	0.00396794
ENSG00000010256.11	chr3	-	2	13.53	0.000323989	0.00398133
ENSG00000166140.17	chr15	+	2	13.4624	0.000334891	0.00408909
ENSG00000160209.19	chr21	+	3	8.25884	0.000344534	0.00415635
ENSG00000116132.12	chr1	+	3	8.25821	0.000344736	0.00415635
ENSG00000141552.18	chr17	+	2	13.2731	0.00036746	0.00440263
ENSG00000104529.17	chr8	-	2	13.2382	0.000373817	0.00445098
ENSG00000204628.12	chr5	-	5	5.28404	0.000376989	0.00446104
ENSG00000135390.21	chr12	-	3	8.13331	0.000387341	0.00455541
ENSG00000186716.21	chr22	+	2	13.1231	0.00039556	0.00462371
ENSG00000008838.20	chr17	-	2	12.9722	0.000426161	0.00495122
ENSG00000115306.16	chr2	+	3	8.01714	0.000431724	0.00498564
ENSG00000175334.8	chr11	+	2	12.9012	0.000441188	0.00503803
ENSG00000177098.9	chr11	-	2	12.8997	0.000441517	0.00503803
ENSG00000113578.18	chr5	-	2	12.8719	0.000447621	0.00507745
ENSG00000146701.12	chr7	+	2	12.7826	0.000467757	0.00526398
ENSG00000241837.7	chr21	-	3	7.92726	0.000469557	0.00526398
ENSG00000138347.16	chr10	+	2	12.7465	0.000476159	0.00530696
ENSG00000143322.21	chr1	-	2	12.7157	0.000483827	0.00534161
ENSG00000145901.16	chr5	-	2	12.7104	0.000484841	0.00534161
ENSG00000092841.19	chr12	+	2	12.5436	0.000526354	0.00576584
ENSG00000082014.17	chr7	-	2	12.4675	0.000546618	0.00592959
ENSG00000169925.17	chr9	-	2	12.4641	0.00054749	0.00592959
ENSG00000106052.13	chr7	+	2	12.4167	0.000560482	0.0060362
ENSG00000036448.10	chr8	+	3	7.73012	0.00056468	0.00604744
ENSG00000139567.13	chr12	+	3	7.68867	0.000587033	0.0062519
ENSG00000266412.6	chr10	-	2	12.2912	0.000596426	0.00631684
ENSG00000221983.8	chr19	+	2	12.2644	0.000604417	0.0063663
ENSG00000197702.14	chr11	+	3	7.64533	0.000611362	0.00640427
ENSG00000109381.20	chr4	-	2	12.2272	0.000615677	0.00641442
ENSG00000104763.20	chr8	-	7	4.00374	0.00062451	0.00647128
ENSG00000120071.15	chr17	-	2	12.1433	0.000642029	0.00661704
ENSG00000115602.17	chr2	+	2	12.1008	0.000656733	0.00670763
ENSG00000197694.18	chr9	+	2	12.0939	0.000657817	0.00670763
ENSG00000073578.17	chr5	+	3	7.55073	0.000668063	0.00677607
ENSG00000167792.13	chr11	+	3	7.52623	0.000683591	0.00689707
ENSG00000149809.17	chr11	+	2	11.9541	0.00070516	0.00707744
ENSG00000115365.12	chr2	-	2	11.9101	0.000720795	0.00714929
ENSG00000073536.18	chr17	-	2	11.9071	0.000723137	0.00714929
ENSG00000148985.20	chr11	+	3	7.46575	0.000723506	0.00714929
ENSG00000071127.17	chr4	-	3	7.36594	0.000794583	0.00779881
ENSG00000163964.18	chr3	+	2	11.7021	0.000799559	0.00779881
ENSG00000108848.16	chr17	+	3	7.35679	0.000801443	0.00779881
ENSG00000134333.14	chr11	+	2	11.6762	0.000809931	0.0078416
ENSG00000086666.19	chr15	+	2	11.6334	0.000827447	0.00797093
ENSG00000166228.9	chr10	-	2	11.5189	0.000876186	0.00838561
ENSG00000177830.18	chr11	-	2	11.5119	0.000879242	0.00838561
ENSG00000129991.13	chr19	-	2	11.4715	0.00089797	0.00852182
ENSG00000236714.3	chr5	+	2	11.4366	0.000913787	0.00862921
ENSG00000171877.21	chr15	-	2	11.4119	0.000924363	0.00868629
ENSG00000198467.16	chr9	-	4	5.61345	0.00093235	0.00871861
ENSG00000140939.14	chr16	+	2	11.3628	0.0009474	0.00881537
ENSG00000079308.19	chr2	-	9	3.33101	0.000951894	0.00881537
ENSG00000175084.12	chr2	+	4	5.58884	0.000964274	0.00886073
ENSG00000184752.13	chr12	-	2	11.3239	0.000966037	0.00886073
ENSG00000109756.9	chr4	+	5	4.73084	0.000980117	0.00894707
ENSG00000140403.12	chr15	+	2	11.1872	0.00103622	0.00941439
ENSG00000134419.15	chr16	-	2	11.1688	0.00104424	0.00944253
ENSG00000163072.16	chr2	+	2	11.1362	0.00106144	0.00955297
ENSG00000132170.23	chr3	+	2	11.1246	0.00106765	0.00956395
ENSG00000087460.28	chr20	+	5	4.65464	0.0011176	0.00996218
ENSG00000058668.15	chr1	+	2	11.025	0.0011225	0.00996218
ENSG00000131196.18	chr18	+	2	10.9679	0.00115591	0.0102114
ENSG00000164107.9	chr4	-	3	6.94933	0.00117593	0.0103406
ENSG00000137497.18	chr11	-	4	5.42691	0.00119832	0.0104511
ENSG00000167680.17	chr19	-	2	10.8934	0.0011994	0.0104511
ENSG00000228300.14	chr19	+	2	10.7956	0.00126001	0.0109296
ENSG00000196704.14	chr17	+	2	10.7644	0.00127996	0.0110526
ENSG00000075711.21	chr3	-	2	10.7403	0.00129592	0.0111403
ENSG00000231500.7	chr6	+	2	10.7191	0.00131102	0.0111794
ENSG00000110321.19	chr11	-	6	4.0512	0.00131676	0.0111794
ENSG00000159842.15	chr17	-	5	4.55859	0.00131843	0.0111794
ENSG00000107104.20	chr9	+	2	10.6977	0.0013238	0.0111794
ENSG00000196652.12	chr7	+	2	10.6879	0.00133036	0.0111855
ENSG00000168734.14	chr20	+	2	10.6647	0.00134609	0.0112684
ENSG00000139218.18	chr12	-	2	10.6441	0.00136015	0.0113366
ENSG00000079819.19	chr6	-	2	10.5557	0.00142233	0.011786
ENSG00000198832.10	chr22	-	2	10.5501	0.00142637	0.011786
ENSG00000100316.16	chr22	-	2	10.5375	0.00143578	0.0118128
ENSG00000158747.15	chr1	+	2	10.4863	0.00147322	0.0120267
ENSG00000080824.19	chr14	-	4	5.2697	0.00148063	0.0120267
ENSG00000123143.13	chr19	+	2	10.4722	0.00148375	0.0120267
ENSG00000112137.18	chr6	+	3	6.69942	0.00148913	0.0120267
ENSG00000173451.7	chr12	+	2	10.4622	0.00149315	0.0120267
ENSG00000170348.9	chr14	-	2	10.4474	0.00150246	0.0120511
ENSG00000119927.14	chr10	-	2	10.3998	0.00154089	0.0122671
ENSG00000128567.17	chr7	-	2	10.3873	0.00154898	0.0122671
ENSG00000107959.17	chr10	-	2	10.3862	0.00154986	0.0122671
ENSG00000107317.13	chr9	+	3	6.6533	0.00155499	0.0122671
ENSG00000163399.16	chr1	+	2	10.3491	0.00157923	0.0124073
ENSG00000049759.20	chr18	+	2	10.3105	0.00161075	0.0126033
ENSG00000137449.17	chr4	+	2	10.3005	0.00161867	0.0126138
ENSG00000093167.18	chr3	-	2	10.2201	0.00168616	0.0130865
ENSG00000139644.13	chr12	+	2	10.0968	0.00179524	0.0138769
ENSG00000148700.15	chr10	+	3	6.47759	0.00183593	0.0141345
ENSG00000277791.5	chr17	+	2	9.97753	0.00190767	0.0145748
ENSG00000144524.18	chr2	+	2	9.9714	0.00191364	0.0145748
ENSG00000165810.17	chr5	+	3	6.43253	0.00191593	0.0145748
ENSG00000109819.9	chr4	-	2	9.91811	0.00196885	0.0149181
ENSG00000083845.9	chr19	+	2	9.87872	0.00200626	0.0151418
ENSG00000134590.14	chrX	+	2	9.86796	0.00201731	0.0151654
ENSG00000133835.17	chr5	+	2	9.81674	0.00207075	0.0155064
ENSG00000080854.16	chr11	-	2	9.78149	0.00210838	0.0156334
ENSG00000162614.19	chr1	+	3	6.3297	0.00211188	0.0156334
ENSG00000189350.13	chr2	+	2	9.77797	0.00211218	0.0156334
ENSG00000144824.21	chr3	+	4	4.99735	0.00213668	0.0157539
ENSG00000075624.17	chr7	-	2	9.74743	0.00214556	0.0157588
ENSG00000114923.17	chr2	+	4	4.97808	0.00219176	0.0160361
ENSG00000176046.9	chr16	-	2	9.69825	0.00220005	0.0160361
ENSG00000095370.20	chr9	-	3	6.27007	0.00223464	0.0162265
ENSG00000183023.18	chr2	-	3	6.25145	0.00227445	0.0164166
ENSG00000176728.10	chrY	-	2	9.63026	0.00227795	0.0164166
ENSG00000105401.9	chr19	-	2	9.56393	0.00235669	0.0169205
ENSG00000104325.7	chr8	+	2	9.52472	0.00240452	0.0171995
ENSG00000105379.10	chr19	-	2	9.37606	0.00259535	0.0184301
ENSG00000161955.16	chr17	+	2	9.3756	0.00259579	0.0184301
ENSG00000186184.19	chr13	+	2	9.32132	0.00266923	0.0188816
ENSG00000099991.18	chr22	+	2	9.30392	0.00269323	0.0189813
ENSG00000123349.15	chr12	+	2	9.24717	0.00277347	0.0194752
ENSG00000105323.17	chr19	+	2	9.14102	0.00292888	0.0204403
ENSG00000135241.17	chr7	-	2	9.1388	0.00293223	0.0204403
ENSG00000075413.19	chr14	+	2	9.10705	0.00298081	0.0207009
ENSG00000226742.4	chr18	+	2	9.10018	0.00299122	0.0207009
ENSG00000113916.18	chr3	-	2	8.95249	0.00322825	0.022261
ENSG00000069275.13	chr1	-	2	8.92123	0.00328084	0.0225426
ENSG00000101161.8	chr20	+	2	8.88111	0.00334964	0.0229331
ENSG00000108107.15	chr19	+	2	8.85067	0.00340304	0.0232158
ENSG00000122406.14	chr1	+	2	8.8273	0.00344427	0.0234137
ENSG00000178188.14	chr16	+	2	8.81314	0.00346962	0.0235027
ENSG00000184939.16	chr16	+	2	8.69203	0.00369445	0.0249375
ENSG00000127603.30	chr1	+	8	3.04474	0.00372699	0.0250129
ENSG00000119314.16	chr9	-	2	8.66893	0.003739	0.0250129
ENSG00000167685.15	chr19	+	2	8.66597	0.00374476	0.0250129
ENSG00000137075.18	chr9	-	3	5.72009	0.00376814	0.0250817
ENSG00000149932.17	chr16	+	2	8.60882	0.00385757	0.0255881
ENSG00000135090.14	chr12	-	2	8.57577	0.00392439	0.0259416
ENSG00000198626.17	chr1	+	3	5.66379	0.00397572	0.0261906
ENSG00000013563.14	chrX	-	2	8.53212	0.00401447	0.0263553
ENSG00000203879.12	chrX	+	3	5.64312	0.00405477	0.026529
ENSG00000275215.1	chr21	+	2	8.4864	0.0041151	0.0268321
ENSG00000100124.15	chr22	-	2	8.47582	0.00413384	0.0268629
ENSG00000153187.20	chr1	-	4	4.49166	0.00421424	0.0272929
ENSG00000168405.17	chr6	-	3	5.59254	0.00425502	0.0274642
ENSG00000136521.13	chr3	+	2	8.33587	0.00444661	0.0286045
ENSG00000188176.12	chr17	+	2	8.32596	0.00446967	0.0286567
ENSG00000179950.14	chr8	-	2	8.31873	0.00448656	0.0286691
ENSG00000165995.22	chr10	+	3	5.51101	0.00459902	0.0292365
ENSG00000198624.13	chr5	-	2	8.26846	0.00460586	0.0292365
ENSG00000162772.17	chr1	+	3	5.50371	0.00463168	0.0293034
ENSG00000168575.10	chr8	-	2	8.24755	0.00465643	0.0293631
ENSG00000205581.11	chr21	-	2	8.21672	0.00473208	0.0296756
ENSG00000143226.15	chr1	+	2	8.21123	0.00475002	0.0296756
ENSG00000138594.14	chr15	+	2	8.20851	0.00475243	0.0296756
ENSG00000174405.14	chr13	-	2	8.19661	0.00478208	0.0297638
ENSG00000087074.8	chr19	+	2	8.1761	0.00483366	0.0299875
ENSG00000176946.12	chr2	-	2	8.14735	0.00490692	0.0303437
ENSG00000178980.15	chr19	+	2	8.1117	0.00499935	0.0308159
ENSG00000166317.12	chr10	-	2	8.10296	0.00502251	0.0308595
ENSG00000165912.16	chr11	-	2	8.06794	0.0051153	0.0313292
ENSG00000126247.11	chr19	+	3	5.38441	0.00518963	0.031558
ENSG00000130844.19	chr19	+	2	8.0396	0.0051918	0.031558
ENSG00000101413.12	chr20	+	3	5.37952	0.00521394	0.031558
ENSG00000002933.9	chr7	+	2	8.02438	0.00523337	0.031558
ENSG00000117859.19	chr1	+	2	8.0238	0.00523497	0.031558
ENSG00000164708.6	chr7	-	2	7.94481	0.00546065	0.0327978
ENSG00000167863.12	chr17	-	2	7.93841	0.00547486	0.0327978
ENSG00000225663.8	chr17	-	2	7.92784	0.00550533	0.0328491
ENSG00000100284.22	chr22	+	2	7.92355	0.00551774	0.0328491
ENSG00000126709.16	chr1	-	2	7.91775	0.00553483	0.0328491
ENSG00000178802.18	chr15	+	3	5.30261	0.00561141	0.0332008
ENSG00000101224.18	chr20	+	2	7.87003	0.00567511	0.0334744
ENSG00000162616.9	chr1	+	2	7.83164	0.00579085	0.0340523
ENSG00000068831.19	chr11	-	3	5.24229	0.00594443	0.0348485
ENSG00000133460.19	chr22	+	2	7.77486	0.00596649	0.0348712
ENSG00000135404.12	chr12	-	4	4.22852	0.00599932	0.0349565
ENSG00000160014.17	chr19	+	2	7.7315	0.00610431	0.0354167
ENSG00000162734.13	chr1	+	2	7.7281	0.00611525	0.0354167
ENSG00000112419.14	chr6	+	2	7.68949	0.00624098	0.036036
ENSG00000142507.10	chr17	+	2	7.66721	0.00631476	0.0363526
ENSG00000086848.15	chr11	-	2	7.63327	0.00642956	0.0369026
ENSG00000145779.8	chr5	+	2	7.57541	0.00663356	0.037911
ENSG00000144802.11	chr3	+	2	7.56853	0.00665637	0.037911
ENSG00000156298.13	chrX	+	2	7.56516	0.00666458	0.037911
ENSG00000185787.15	chr15	+	2	7.55665	0.00669432	0.0379675
ENSG00000150764.14	chr11	+	3	5.1136	0.00672316	0.0380186
ENSG00000074416.14	chr3	-	2	7.52903	0.00679308	0.038301
ENSG00000128918.15	chr15	-	3	5.07954	0.00694646	0.0390509
ENSG00000160710.18	chr1	-	2	7.46006	0.00704523	0.0394904
ENSG00000111640.15	chr12	+	3	5.05055	0.00714144	0.039913
ENSG00000226306.6	chr5	+	2	7.4229	0.00718523	0.0400409
ENSG00000150093.20	chr10	-	2	7.40012	0.00727247	0.0404097
ENSG00000050165.18	chr11	-	3	5.00795	0.00744213	0.0412329
ENSG00000198157.11	chrX	-	2	7.34584	0.00748482	0.0412862
ENSG00000106018.14	chr7	-	2	7.34332	0.00749483	0.0412862
ENSG00000166348.19	chr10	-	2	7.28275	0.00773967	0.0424501
ENSG00000165629.20	chr10	+	3	4.96512	0.00775041	0.0424501
ENSG00000265681.7	chr18	-	2	7.25077	0.00787229	0.0429948
ENSG00000178982.10	chr19	+	2	7.18796	0.0081396	0.0442342
ENSG00000115310.18	chr2	-	3	4.91326	0.00814537	0.0442342
ENSG00000240583.14	chr7	+	3	4.8656	0.00852623	0.0461717
ENSG00000253320.7	chr8	+	2	7.08372	0.00860501	0.0463892
ENSG00000156265.16	chr21	+	2	7.08201	0.00861479	0.0463892
ENSG00000204922.5	chr11	+	2	7.06595	0.00868609	0.0466421
ENSG00000122367.20	chr10	+	2	7.03843	0.00881447	0.0471993
ENSG00000172819.17	chr12	-	3	4.81523	0.00894837	0.0477828
ENSG00000135218.19	chr7	+	7	2.88258	0.00899071	0.0478319
ENSG00000246273.8	chr11	+	2	6.99491	0.00902159	0.0478319
ENSG00000189403.15	chr13	-	4	3.92316	0.00903241	0.0478319
ENSG00000213145.10	chr14	+	2	6.97805	0.00910325	0.0480742
ENSG00000187720.14	chr15	+	2	6.95921	0.00919562	0.0483225
ENSG00000196230.14	chr6	+	2	6.95811	0.00920068	0.0483225
ENSG00000167797.8	chr11	-	2	6.90431	0.00946909	0.049454
ENSG00000139132.15	chr12	+	4	3.8874	0.00947517	0.049454
ENSG00000105223.20	chr19	+	3	4.75361	0.00949352	0.049454
ENSG00000166206.15	chr15	-	2	6.87377	0.00963153	0.050037
ENSG00000136710.10	chr2	-	2	6.80345	0.00999446	0.0517821
ENSG00000169398.19	chr8	-	2	6.7925	0.0100533	0.0519464
ENSG00000121361.5	chr12	-	2	6.78026	0.0101198	0.0520793
ENSG00000204310.13	chr6	-	2	6.77771	0.0101333	0.0520793
ENSG00000198964.14	chr10	-	2	6.716	0.0104744	0.0535688
ENSG00000119950.21	chr10	+	3	4.65077	0.010479	0.0535688
ENSG00000186073.14	chr15	+	2	6.70964	0.010517	0.0536197
ENSG00000143420.19	chr1	-	2	6.67962	0.010681	0.0543116
ENSG00000111077.18	chr12	+	3	4.61193	0.0108775	0.0550065
ENSG00000184009.13	chr17	-	2	6.64044	0.0109086	0.0550065
ENSG00000133401.16	chr5	+	2	6.63638	0.0109321	0.0550065
ENSG00000151247.13	chr4	-	2	6.63633	0.0109324	0.0550065
ENSG00000185088.14	chr15	-	2	6.62766	0.0109835	0.0550694
ENSG00000159200.18	chr21	-	2	6.62563	0.0110024	0.0550694
ENSG00000198728.11	chr10	-	2	6.61482	0.0110596	0.0552116
ENSG00000129084.18	chr11	-	2	6.60591	0.0111127	0.0553328
ENSG00000119729.12	chr2	+	3	4.55675	0.0114703	0.0569654
ENSG00000185973.12	chrX	-	2	6.53786	0.0115274	0.0571007
ENSG00000137767.14	chr15	+	2	6.52662	0.0115974	0.0572455
ENSG00000198125.13	chr22	-	5	3.28024	0.0116163	0.0572455
ENSG00000172757.13	chr11	-	2	6.51774	0.011653	0.0572792
ENSG00000008056.14	chrX	-	2	6.49889	0.011772	0.0577162
ENSG00000137168.8	chr6	-	2	6.49303	0.0118093	0.0577511
ENSG00000099204.20	chr10	-	5	3.24615	0.0123	0.0599976
ENSG00000116667.15	chr1	+	2	6.40892	0.0123578	0.0601264
ENSG00000140632.17	chr16	-	3	4.45393	0.0126626	0.0611901
ENSG00000185236.12	chr19	+	2	6.36337	0.0126657	0.0611901
ENSG00000088387.19	chr13	-	2	6.36243	0.0126721	0.0611901
ENSG00000164741.15	chr8	-	3	4.44833	0.012731	0.061228
ENSG00000184640.20	chr17	+	4	3.66569	0.0127439	0.061228
ENSG00000108387.15	chr17	-	3	4.43459	0.0129005	0.0618258
ENSG00000132669.14	chr20	+	4	3.65235	0.012973	0.0620181
ENSG00000176978.14	chr9	-	2	6.26196	0.0133804	0.0637141
ENSG00000148396.18	chr9	-	2	6.25949	0.0133983	0.0637141
ENSG00000119640.9	chr14	-	2	6.25547	0.0134275	0.0637141
ENSG00000166278.15	chr6	+	2	6.21019	0.0137612	0.0651366
ENSG00000139146.14	chr12	-	2	6.20564	0.0137952	0.0651366
ENSG00000198959.12	chr20	-	2	6.1975	0.0138563	0.0652644
ENSG00000198668.13	chr14	+	2	6.1852	0.0139491	0.0655402
ENSG00000178149.17	chr3	-	2	6.1799	0.0139893	0.0655567
ENSG00000136895.19	chr9	+	2	6.17573	0.014021	0.0655567
ENSG00000163681.16	chr3	+	4	3.58798	0.0141368	0.0659004
ENSG00000132530.17	chr17	+	2	6.15644	0.0141688	0.0659004
ENSG00000104872.11	chr19	-	2	6.15268	0.0141976	0.0659004
ENSG00000114861.23	chr3	-	5	3.15032	0.0144397	0.0668621
ENSG00000115594.12	chr2	+	3	4.30241	0.0146562	0.0677011
ENSG00000278311.5	chr17	+	2	6.07934	0.014775	0.0680858
ENSG00000130811.12	chr19	-	2	6.05758	0.014951	0.0687316
ENSG00000179010.15	chr4	+	2	6.04042	0.0150914	0.0692108
ENSG00000110047.18	chr11	-	2	6.03467	0.0151387	0.0692621
ENSG00000140350.15	chr15	-	2	6.0132	0.0153168	0.069814
ENSG00000008130.15	chr1	-	2	6.00912	0.0153509	0.069814
ENSG00000175550.8	chr11	+	2	6.00701	0.0153686	0.069814
ENSG00000100418.8	chr22	-	2	5.9919	0.0154956	0.0702248
ENSG00000139579.13	chr12	+	2	5.97728	0.0156196	0.0706197
ENSG00000078808.19	chr1	-	2	5.96544	0.0157208	0.0707171
ENSG00000164587.13	chr5	-	3	4.22868	0.0157313	0.0707171
ENSG00000258289.9	chr14	+	2	5.96183	0.0157518	0.0707171
ENSG00000085733.16	chr11	+	2	5.9461	0.0158876	0.0711599
ENSG00000065989.16	chr19	+	2	5.91904	0.0161239	0.0719681
ENSG00000177426.22	chr18	+	3	4.20187	0.0161431	0.0719681
ENSG00000172037.14	chr3	-	2	5.89752	0.0163146	0.0725641
ENSG00000090621.15	chr1	-	2	5.87537	0.0165133	0.0731862
ENSG00000143761.16	chr1	+	2	5.87342	0.0165308	0.0731862
ENSG00000164597.15	chr7	-	3	4.16999	0.0166471	0.0735312
ENSG00000143774.17	chr1	+	3	4.14651	0.0170286	0.0750433
ENSG00000137936.18	chr1	-	2	5.80861	0.0171274	0.0753057
ENSG00000178607.17	chr17	-	2	5.80208	0.0171888	0.0754024
ENSG00000145675.15	chr5	+	5	3.03897	0.0173871	0.0760983
ENSG00000126457.22	chr19	+	3	4.11356	0.0175787	0.0766281
ENSG00000219626.9	chr2	+	2	5.76015	0.0175881	0.0766281
ENSG00000143179.16	chr1	+	2	5.74248	0.0177593	0.0771986
ENSG00000160408.15	chr9	-	2	5.71923	0.0179872	0.0780126
ENSG00000119699.8	chr14	-	2	5.6827	0.0183515	0.0794128
ENSG00000073670.14	chr17	+	2	5.66244	0.0185568	0.0799816
ENSG00000133142.18	chrX	+	2	5.6615	0.0185664	0.0799816
ENSG00000132205.11	chr18	+	2	5.64302	0.0187559	0.0806166
ENSG00000050820.17	chr16	-	3	4.03622	0.0189416	0.0812329
ENSG00000106682.16	chr7	+	2	5.6127	0.0190711	0.0814314
ENSG00000159348.13	chr1	-	2	5.61009	0.0190986	0.0814314
ENSG00000117984.15	chr11	-	2	5.60849	0.0191153	0.0814314
ENSG00000164713.10	chr7	+	3	4.01781	0.0192816	0.0819573
ENSG00000198796.7	chr18	-	2	5.56388	0.0195905	0.0830865
ENSG00000077782.21	chr8	-	2	5.55186	0.0197207	0.0834538
ENSG00000125730.17	chr19	-	2	5.5462	0.0197822	0.0835299
ENSG00000182551.14	chr2	-	2	5.53405	0.0199151	0.0839062
ENSG00000132561.14	chr8	+	2	5.51771	0.0201046	0.0844223
ENSG00000105707.15	chr19	+	2	5.51422	0.020134	0.0844223
ENSG00000114126.18	chr3	-	3	3.96806	0.0202308	0.0844223
ENSG00000136715.19	chr2	-	2	5.50519	0.0202345	0.0844223
ENSG00000177000.13	chr1	-	4	3.31793	0.0202578	0.0844223
ENSG00000102786.15	chr13	-	2	5.4918	0.0203845	0.0847661
ENSG00000104967.8	chr19	-	2	5.48016	0.0205158	0.0851273
ENSG00000093072.18	chr22	-	2	5.46473	0.0206918	0.0856722
ENSG00000166444.19	chr11	-	3	3.92232	0.0211454	0.087253
ENSG00000163565.19	chr1	+	4	3.285	0.0211646	0.087253
ENSG00000105697.9	chr19	+	2	5.4207	0.0212102	0.0872532
ENSG00000166741.8	chr11	+	2	5.39275	0.0215405	0.0884219
ENSG00000068745.15	chr3	-	3	3.89164	0.0217819	0.0887359
ENSG00000159592.11	chr1	-	3	3.89028	0.0218106	0.0887359
ENSG00000196419.13	chr22	+	2	5.36879	0.0218181	0.0887359
ENSG00000128595.17	chr7	+	2	5.36529	0.0218605	0.0887359
ENSG00000165929.13	chr14	-	2	5.35953	0.0219303	0.0887359
ENSG00000100243.21	chr22	-	2	5.35934	0.0219325	0.0887359
ENSG00000126217.21	chr13	+	2	5.35865	0.021941	0.0887359
ENSG00000138757.15	chr4	-	2	5.35046	0.0220407	0.0889518
ENSG00000181666.18	chr19	+	2	5.33127	0.0222762	0.0896246
ENSG00000112936.19	chr5	+	4	3.24422	0.0223445	0.0896246
ENSG00000168542.16	chr2	+	2	5.32627	0.0223477	0.0896246
ENSG00000196313.11	chr7	+	2	5.31664	0.0224575	0.0896617
ENSG00000141013.17	chr16	+	2	5.31627	0.0224621	0.0896617
ENSG00000262660.1	chr17	+	2	5.31345	0.0224973	0.0896617
ENSG00000144476.6	chr2	+	2	5.29111	0.0227781	0.0905925
ENSG00000185624.16	chr17	-	3	3.83341	0.0230439	0.0914599
ENSG00000093144.19	chr6	-	2	5.24929	0.0233124	0.0923343
ENSG00000196465.10	chr12	+	2	5.22935	0.0235719	0.0931699
ENSG00000048052.23	chr7	+	4	3.19123	0.023972	0.0945561
ENSG00000158856.18	chr8	+	4	3.18515	0.0241661	0.095126
ENSG00000175287.19	chr9	+	2	5.17127	0.0243454	0.0956354
ENSG00000147408.14	chr8	-	3	3.7741	0.0244052	0.0956746
ENSG00000077150.20	chr10	+	2	5.14476	0.0247071	0.0966604
ENSG00000120616.16	chr10	-	2	5.11937	0.0250591	0.0978337
ENSG00000173402.12	chr3	+	2	5.11579	0.0251091	0.0978337
ENSG00000140382.15	chr15	+	2	5.10881	0.0252069	0.0980157
ENSG00000005022.6	chrX	+	2	5.0907	0.0254627	0.0988099
ENSG00000169045.17	chr5	-	2	5.0834	0.0255666	0.0989922
ENSG00000157600.12	chrX	+	2	5.08014	0.025613	0.0989922
ENSG00000171408.14	chr6	+	2	5.07075	0.0257475	0.0993119
ENSG00000170345.10	chr14	+	2	5.05649	0.0259635	0.0998893
ENSG00000173281.5	chr8	-	2	5.05321	0.0260014	0.0998893
ENSG00000170473.17	chr12	-	2	5.04821	0.0260734	0.0999656
ENSG00000111678.11	chr12	+	2	5.01891	0.0265037	0.1014
ENSG00000058056.10	chr3	+	3	3.68698	0.0265535	0.1014
ENSG00000170142.12	chr3	+	2	5.00064	0.0267757	0.102046
ENSG00000188730.5	chr7	+	2	4.97525	0.0271585	0.103299
ENSG00000163412.13	chr3	-	2	4.95809	0.0274206	0.10409
ENSG00000148120.17	chr9	+	3	3.64912	0.0275454	0.104357
ENSG00000100354.21	chr22	+	2	4.94223	0.0276651	0.104604
ENSG00000104824.18	chr19	-	2	4.93654	0.0277533	0.104628
ENSG00000132938.22	chr13	+	2	4.93233	0.0278189	0.104628
ENSG00000112531.17	chr6	+	2	4.93128	0.0278352	0.104628
ENSG00000073711.11	chr3	+	2	4.91832	0.0280381	0.105184
ENSG00000110871.15	chr12	-	2	4.91033	0.0281639	0.105449
ENSG00000166681.14	chrX	+	2	4.9031	0.0282781	0.105642
ENSG00000187288.12	chr3	-	2	4.90079	0.0283256	0.105642
ENSG00000140830.9	chr16	-	2	4.89184	0.0284573	0.105833
ENSG00000145390.11	chr4	+	2	4.88997	0.0284872	0.105833
ENSG00000115414.21	chr2	-	5	2.73663	0.0286817	0.10635
ENSG00000117707.16	chr1	+	3	3.60334	0.028795	0.106564
ENSG00000155366.17	chr1	-	2	4.85561	0.0290417	0.10727
ENSG00000168488.18	chr16	+	2	4.83956	0.0293046	0.108032
ENSG00000249307.7	chr4	+	2	4.82144	0.0296044	0.108928
ENSG00000203880.12	chr20	+	2	4.81497	0.0297121	0.109115
ENSG00000173272.16	chr2	-	2	4.78068	0.0302925	0.111034
ENSG00000145703.16	chr5	+	2	4.77548	0.0303794	0.11114
ENSG00000171714.12	chr11	+	2	4.77026	0.0304687	0.111254
ENSG00000043143.21	chr5	+	3	3.53957	0.0306317	0.111637
ENSG00000101040.19	chr20	-	2	4.74472	0.03091	0.112437
ENSG00000076555.15	chr12	+	4	2.99458	0.0311085	0.112892
ENSG00000141127.15	chr17	+	2	4.73083	0.0311529	0.112892
ENSG00000130600.19	chr11	-	3	3.51904	0.0312478	0.113023
ENSG00000165671.21	chr5	+	2	4.70448	0.031619	0.11415
ENSG00000169554.22	chr2	-	3	3.50089	0.0318031	0.114599
ENSG00000166913.13	chr20	+	2	4.68594	0.0319515	0.114917
ENSG00000182606.17	chr3	+	2	4.67002	0.0322397	0.115401
ENSG00000284969.1	chr11	-	2	4.66741	0.0322872	0.115401
ENSG00000140105.18	chr14	-	2	4.66692	0.0322969	0.115401
ENSG00000092964.18	chr8	+	2	4.66525	0.0323266	0.115401
ENSG00000165269.13	chr9	-	2	4.6565	0.032487	0.115687
ENSG00000147403.18	chrX	+	2	4.65428	0.0325275	0.115687
ENSG00000105202.9	chr19	-	2	4.64421	0.0327131	0.115805
ENSG00000126970.16	chrX	-	2	4.64408	0.0327154	0.115805
ENSG00000124749.17	chr6	-	2	4.64268	0.032742	0.115805
ENSG00000108821.14	chr17	-	7	2.30811	0.0329181	0.116214
ENSG00000110651.12	chr11	+	3	3.45739	0.0331745	0.116872
ENSG00000167543.16	chr17	+	3	3.45576	0.0332265	0.116872
ENSG00000138303.18	chr10	-	3	3.44301	0.0336403	0.117952
ENSG00000132334.17	chr10	+	3	3.44252	0.0336565	0.117952
ENSG00000063244.13	chr19	+	2	4.58094	0.0339048	0.118605
ENSG00000101557.15	chr18	+	2	4.57655	0.0339891	0.118683
ENSG00000183955.13	chr12	+	2	4.57179	0.0340808	0.118787
ENSG00000231721.7	chr7	-	2	4.56072	0.0342953	0.119318
ENSG00000103710.11	chr15	-	2	4.55017	0.0345067	0.119836
ENSG00000169764.16	chr2	+	3	3.41017	0.0347303	0.120207
ENSG00000064205.11	chr20	+	2	4.53862	0.0347389	0.120207
ENSG00000111642.16	chr12	-	3	3.40207	0.0350046	0.120908
ENSG00000124942.14	chr11	-	3	3.39987	0.0350793	0.120948
ENSG00000144560.15	chr3	-	4	2.89928	0.0352843	0.121303
ENSG00000249464.6	chr4	+	2	4.50934	0.0353088	0.121303
ENSG00000198363.18	chr8	-	3	3.38221	0.0356859	0.122379
ENSG00000135679.25	chr12	+	2	4.48073	0.0358868	0.122838
ENSG00000205220.12	chr16	-	2	4.47717	0.0359596	0.122838
ENSG00000152689.18	chr2	+	3	3.37285	0.036012	0.122838
ENSG00000129422.14	chr8	-	3	3.36282	0.0363644	0.12382
ENSG00000127946.17	chr7	-	2	4.428	0.0369789	0.125667
ENSG00000055163.20	chr5	+	2	4.42519	0.0370381	0.125667
ENSG00000116675.16	chr1	+	2	4.41173	0.0373228	0.12641
ENSG00000106772.18	chr9	-	2	4.40398	0.0374997	0.126763
ENSG00000088899.15	chr20	-	2	4.40063	0.0375593	0.126763
ENSG00000116922.14	chr1	-	2	4.39033	0.0377803	0.127196
ENSG00000012061.16	chr19	-	5	2.56768	0.0378203	0.127196
ENSG00000076770.14	chrX	-	2	4.38303	0.0379385	0.12732
ENSG00000075131.10	chr15	-	2	4.38061	0.0379902	0.12732
ENSG00000178209.16	chr8	-	7	2.23772	0.0384033	0.128262
ENSG00000110077.14	chr11	-	2	4.36098	0.0384175	0.128262
ENSG00000137843.12	chr15	+	2	4.35328	0.0385866	0.128262
ENSG00000125520.14	chr20	+	3	3.29976	0.0386622	0.128262
ENSG00000162496.9	chr1	-	2	4.34923	0.0386758	0.128262
ENSG00000268858.2	chr20	-	2	4.34663	0.0387333	0.128262
ENSG00000151414.15	chr1	+	2	4.34634	0.0387396	0.128262
ENSG00000100106.22	chr22	+	2	4.32123	0.0392987	0.129889
ENSG00000110031.13	chr11	-	2	4.31777	0.0393766	0.129923
ENSG00000204256.14	chr6	+	3	3.27514	0.0395986	0.130431
ENSG00000079435.10	chr19	-	2	4.30352	0.0397044	0.130555
ENSG00000242282.6	chr2	-	2	4.29419	0.0399105	0.130894
ENSG00000100320.23	chr22	-	2	4.29144	0.0399733	0.130894
ENSG00000107796.13	chr10	-	2	4.28739	0.0400758	0.130894
ENSG00000156709.15	chrX	-	3	3.26269	0.0400808	0.130894
ENSG00000175505.11	chr11	-	2	4.28171	0.0401979	0.131053
ENSG00000177666.17	chr11	+	2	4.27606	0.0403263	0.131249
ENSG00000172239.14	chr5	-	2	4.26651	0.0405473	0.13167
ENSG00000036672.16	chr11	-	4	2.79243	0.0406239	0.13167
ENSG00000120833.14	chr12	+	4	2.79173	0.0406617	0.13167
ENSG00000167658.16	chr19	-	3	3.23082	0.0413454	0.133469
ENSG00000166326.7	chr11	+	2	4.23198	0.0413566	0.133469
ENSG00000109654.16	chr4	+	2	4.22646	0.0414875	0.133666
ENSG00000117399.14	chr1	+	2	4.21984	0.0416452	0.13395
ENSG00000113580.15	chr5	-	2	4.20263	0.0420579	0.13505
ENSG00000129675.16	chrX	-	2	4.17473	0.0427363	0.136999
ENSG00000146540.15	chr7	-	3	3.17652	0.0435844	0.139485
ENSG00000080189.15	chr20	-	2	4.13387	0.0437511	0.139785
ENSG00000188938.17	chr9	-	3	3.16529	0.0440632	0.140548
ENSG00000072682.20	chr5	-	2	4.11345	0.0442678	0.140966
ENSG00000123562.18	chrX	-	2	4.10399	0.0445094	0.141423
ENSG00000198722.14	chr9	+	2	4.10206	0.0445589	0.141423
ENSG00000068308.14	chrX	-	2	4.07588	0.0452354	0.143333
ENSG00000179222.18	chrX	+	2	4.06414	0.0455424	0.144038
ENSG00000138085.17	chr2	+	2	4.05961	0.0456614	0.144038
ENSG00000204084.13	chr1	-	2	4.05878	0.0456834	0.144038
ENSG00000267107.8	chr19	-	3	3.1245	0.0458475	0.144318
ENSG00000124422.12	chr17	-	2	4.04391	0.0460766	0.14462
ENSG00000122986.14	chr12	-	2	4.04324	0.0460945	0.14462
ENSG00000164091.12	chr3	-	2	4.03272	0.046375	0.145051
ENSG00000182732.18	chr14	+	2	4.03242	0.0463829	0.145051
ENSG00000065978.19	chr1	+	2	4.00057	0.0472436	0.147502
ENSG00000184840.12	chr5	+	2	3.99148	0.0474923	0.148037
ENSG00000109572.14	chr4	+	2	3.98512	0.0476671	0.148341
ENSG00000079999.14	chr19	-	2	3.95793	0.0484227	0.150448
ENSG00000165868.16	chr10	-	2	3.94339	0.0488317	0.151427
ENSG00000130522.6	chr19	-	2	3.94135	0.0488959	0.151427
ENSG00000134905.17	chr13	-	2	3.93102	0.0491828	0.15207
ENSG00000102024.18	chrX	+	2	3.91054	0.0497697	0.153637
ENSG00000111961.18	chr6	+	3	3.03177	0.0501794	0.154618
ENSG00000136143.16	chr13	-	2	3.89232	0.0502984	0.154618
ENSG00000150347.17	chr10	+	2	3.89131	0.0503296	0.154618
ENSG00000137496.18	chr11	+	2	3.87657	0.05076	0.155528
ENSG00000214063.11	chr11	+	2	3.87563	0.0507878	0.155528
ENSG00000167468.18	chr19	+	2	3.87139	0.0509128	0.155662
ENSG00000134326.12	chr2	-	2	3.86409	0.0511291	0.156074
ENSG00000140718.21	chr16	+	2	3.82332	0.052355	0.159562
ENSG00000082438.18	chr2	-	2	3.80829	0.0528148	0.160708
ENSG00000143337.19	chr1	+	2	3.8048	0.0529222	0.16078
ENSG00000114853.15	chr3	+	2	3.79869	0.0531108	0.160835
ENSG00000167766.19	chr19	-	2	3.7933	0.0532775	0.160835
ENSG00000103091.15	chr16	-	2	3.79295	0.0532886	0.160835
ENSG00000087008.16	chr4	-	2	3.7905	0.0533646	0.160835
ENSG00000170027.7	chr7	-	2	3.78913	0.0534071	0.160835
ENSG00000118473.22	chr1	+	2	3.78797	0.0534439	0.160835
ENSG00000164733.22	chr8	-	3	2.96015	0.0538069	0.161674
ENSG00000104951.16	chr19	-	2	3.77101	0.0539739	0.161922
ENSG00000110492.16	chr11	+	2	3.76522	0.0541565	0.162216
ENSG00000108622.11	chr17	-	2	3.74029	0.0549495	0.164334
ENSG00000007237.19	chr17	-	4	2.56109	0.0550525	0.164386
ENSG00000112773.16	chr6	-	2	3.72846	0.0553303	0.164958
ENSG00000204267.16	chr6	-	2	3.71656	0.0557162	0.165775
ENSG00000127022.16	chr5	+	2	3.71468	0.0557773	0.165775
ENSG00000020577.14	chr14	+	5	2.32438	0.0560883	0.166419
ENSG00000234438.5	chr15	+	2	3.70276	0.0561674	0.166419
ENSG00000143153.13	chr1	+	2	3.69492	0.0564252	0.166925
ENSG00000107738.20	chr10	-	2	3.67935	0.0569431	0.16803
ENSG00000042753.12	chr19	-	2	3.67754	0.0570019	0.16803
ENSG00000126246.10	chr19	-	2	3.67575	0.0570617	0.16803
ENSG00000147526.20	chr8	+	3	2.89803	0.057166	0.168079
ENSG00000068305.17	chr15	+	2	3.6664	0.0573747	0.168322
ENSG00000079277.22	chr1	-	2	3.66492	0.0574243	0.168322
ENSG00000171631.16	chr11	+	3	2.88046	0.0581538	0.1702
ENSG00000136205.17	chr7	-	3	2.87387	0.0585288	0.171036
ENSG00000244274.8	chr20	+	3	2.8618	0.05923	0.172822
ENSG00000143951.16	chr2	-	3	2.85223	0.0597788	0.174158
ENSG00000073910.23	chr13	+	5	2.28276	0.0599644	0.174433
ENSG00000259498.1	chr15	-	2	3.58623	0.0601365	0.174458
ENSG00000187514.17	chr2	+	2	3.58562	0.0601579	0.174458
ENSG00000101665.9	chr18	-	2	3.58315	0.0602458	0.174458
ENSG00000117625.14	chr1	+	2	3.57662	0.0604767	0.174862
ENSG00000156113.24	chr10	-	2	3.5682	0.0607768	0.175024
ENSG00000103496.15	chr16	+	2	3.56772	0.0607942	0.175024
ENSG00000120278.16	chr6	+	2	3.56725	0.060811	0.175024
ENSG00000132386.11	chr17	+	2	3.56482	0.0608979	0.175024
ENSG00000113140.11	chr5	-	2	3.56225	0.06099	0.175027
ENSG00000178096.9	chr1	+	2	3.5502	0.0614237	0.176008
ENSG00000188677.15	chr22	+	2	3.54572	0.061586	0.17621
ENSG00000039523.20	chr16	+	2	3.53709	0.0618995	0.176327
ENSG00000174891.13	chr3	+	2	3.537	0.0619028	0.176327
ENSG00000169519.21	chr11	+	2	3.53699	0.061903	0.176327
ENSG00000132478.10	chr17	+	2	3.53139	0.0621075	0.176519
ENSG00000146083.12	chr5	-	2	3.5301	0.0621547	0.176519
ENSG00000124788.19	chr6	-	2	3.48763	0.0637303	0.180726
ENSG00000235109.7	chr6	-	2	3.48229	0.0639312	0.181028
ENSG00000081277.13	chr1	+	2	3.47439	0.06423	0.181414
ENSG00000077092.19	chr3	+	2	3.47369	0.0642566	0.181414
ENSG00000179094.16	chr17	-	2	3.45894	0.064819	0.182732
ENSG00000141759.15	chr18	-	2	3.45532	0.0649575	0.182854
ENSG00000077157.22	chr1	+	2	3.44281	0.0654398	0.183942
ENSG00000160072.20	chr1	+	2	3.43537	0.0657282	0.184482
ENSG00000162595.7	chr1	-	2	3.42589	0.0661116	0.185286
ENSG00000135486.19	chr12	+	2	3.41402	0.0665638	0.186281
ENSG00000046653.15	chrX	-	2	3.40013	0.0671138	0.187277
ENSG00000072818.12	chr17	+	2	3.39953	0.0671376	0.187277
ENSG00000131981.16	chr14	+	3	2.73213	0.0672126	0.187277
ENSG00000130985.17	chrX	+	2	3.3776	0.068016	0.189241
ENSG00000186111.11	chr19	-	2	3.37409	0.0681579	0.18936
ENSG00000099260.11	chr1	+	2	3.36167	0.0686617	0.19006
ENSG00000167703.15	chr17	-	2	3.36088	0.0686939	0.19006
ENSG00000136699.20	chr2	-	2	3.36056	0.068707	0.19006
ENSG00000171492.14	chr1	+	2	3.35346	0.068997	0.190587
ENSG00000155755.19	chr2	-	2	3.34178	0.0694773	0.191637
ENSG00000101605.13	chr18	-	2	3.32221	0.0702912	0.193586
ENSG00000115641.19	chr2	-	3	2.68506	0.0703857	0.193586
ENSG00000170871.12	chr4	+	2	3.30824	0.0708769	0.194658
ENSG00000131873.7	chr15	-	2	3.2955	0.0714163	0.195858
ENSG00000134371.14	chr1	+	2	3.29078	0.0716174	0.196129
ENSG00000135316.19	chr6	-	2	3.285	0.0718643	0.196525
ENSG00000171988.19	chr10	-	3	2.65789	0.0722683	0.197181
ENSG00000272391.6	chr7	-	2	3.27462	0.0723101	0.197181
ENSG00000130592.17	chr11	+	3	2.65576	0.0724191	0.197198
ENSG00000128563.13	chr7	+	2	3.26803	0.0725947	0.197396
ENSG00000072310.17	chr17	-	2	3.24482	0.0736087	0.199869
ENSG00000285938.1	chr3	+	2	3.24018	0.0738111	0.200136
ENSG00000106631.8	chr7	-	2	3.23636	0.0739936	0.200347
ENSG00000169122.11	chr8	+	2	3.22383	0.0745352	0.201529
ENSG00000156958.15	chr15	+	2	3.21683	0.0748475	0.202088
ENSG00000258315.5	chr17	+	2	3.21078	0.0751187	0.202535
ENSG00000102125.16	chrX	+	2	3.2076	0.0752619	0.202636
ENSG00000126226.22	chr13	-	2	3.18678	0.0762052	0.204888
ENSG00000266173.7	chr17	-	2	3.17978	0.0765251	0.20546
ENSG00000143344.16	chr1	+	2	3.15217	0.0778021	0.208414
ENSG00000105204.14	chr19	-	2	3.15129	0.0778429	0.208414
ENSG00000173486.14	chr11	+	2	3.1431	0.0782263	0.209149
ENSG00000171681.12	chr12	+	2	3.12913	0.0788852	0.210617
ENSG00000146112.12	chr6	-	3	2.56538	0.0791087	0.21092
ENSG00000108515.18	chr17	+	2	3.11995	0.0793286	0.211213
ENSG00000100138.15	chr22	-	3	2.55999	0.0795267	0.211446
ENSG00000170619.10	chr8	-	2	3.10537	0.0800192	0.212224
ENSG00000232119.8	chrX	+	2	3.10493	0.0800405	0.212224
ENSG00000179335.19	chr15	+	2	3.10138	0.0802117	0.212384
ENSG00000133067.18	chr1	+	3	2.54672	0.0805653	0.213026
ENSG00000113758.13	chr5	-	2	3.08098	0.0812021	0.21421
ENSG00000120333.4	chr1	-	2	3.07882	0.0813077	0.21421
ENSG00000105321.14	chr19	+	2	3.07799	0.0813483	0.21421
ENSG00000182154.8	chr9	+	2	3.07566	0.0814626	0.214216
ENSG00000180879.14	chrX	+	2	3.0537	0.0825475	0.216772
ENSG00000053747.17	chr18	+	3	2.5141	0.0831777	0.217907
ENSG00000163882.9	chr3	+	2	3.03579	0.0834443	0.217907
ENSG00000101940.18	chrX	+	2	3.03534	0.0834665	0.217907
ENSG00000237773.7	chr7	-	2	3.03512	0.0834779	0.217907
ENSG00000085276.19	chr3	-	3	2.50795	0.0836797	0.217907
ENSG00000137831.15	chr15	-	2	3.03099	0.083686	0.217907
ENSG00000124588.22	chr6	+	2	3.02923	0.0837752	0.217907
ENSG00000172824.16	chr16	+	2	3.02237	0.084123	0.218515
ENSG00000137094.15	chr9	+	3	2.5009	0.0842704	0.218601
ENSG00000144579.8	chr2	+	2	3.01129	0.0846875	0.219133
ENSG00000150636.17	chr18	+	2	3.01097	0.084704	0.219133
ENSG00000168214.21	chr4	+	2	2.99317	0.0856206	0.221206
ENSG00000275131.3	chr1	-	2	2.98894	0.0858405	0.221232
ENSG00000011465.18	chr12	-	5	2.057	0.0858616	0.221232
ENSG00000095637.22	chr10	-	2	2.97752	0.0864354	0.22196
ENSG00000101246.20	chr20	-	2	2.97626	0.0865014	0.22196
ENSG00000130529.16	chr19	+	2	2.97364	0.0866385	0.22196
ENSG00000196498.13	chr12	-	4	2.21148	0.0868111	0.22196
ENSG00000061938.20	chr3	-	2	2.96916	0.0868855	0.22196
ENSG00000182093.16	chr21	+	2	2.96859	0.0869039	0.22196
ENSG00000069424.15	chr1	+	3	2.46873	0.0869546	0.22196
ENSG00000132329.11	chr2	+	2	2.9582	0.0874525	0.222934
ENSG00000203485.14	chr14	+	2	2.95179	0.0877931	0.223505
ENSG00000173163.10	chr2	+	2	2.94804	0.0879932	0.223717
ENSG00000170892.13	chr19	+	2	2.94464	0.0881746	0.223858
ENSG00000107669.18	chr10	-	2	2.94137	0.0883495	0.223858
ENSG00000133083.15	chr13	-	3	2.45201	0.0883986	0.223858
ENSG00000120549.18	chr10	+	2	2.93081	0.0889175	0.224875
ENSG00000163485.17	chr1	+	2	2.9246	0.0892533	0.225426
ENSG00000254772.10	chr11	-	2	2.92232	0.0893773	0.225442
ENSG00000160392.13	chr19	-	2	2.91725	0.0896526	0.22584
ENSG00000086758.16	chrX	-	2	2.89706	0.0907598	0.228329
ENSG00000106246.18	chr7	-	2	2.89383	0.0909385	0.228479
ENSG00000198160.15	chr1	+	2	2.88729	0.0913009	0.229089
ENSG00000184702.20	chr22	+	3	2.41097	0.092013	0.230558
ENSG00000054148.18	chr9	+	2	2.87249	0.092127	0.230558
ENSG00000133943.21	chr14	+	2	2.87032	0.092249	0.230562
ENSG00000164951.16	chr8	+	2	2.86465	0.092569	0.230984
ENSG00000204482.11	chr6	+	2	2.86305	0.0926587	0.230984
ENSG00000173175.15	chr3	-	3	2.39123	0.0938097	0.23355
ENSG00000171992.13	chr5	+	3	2.38916	0.0940003	0.233721
ENSG00000198482.14	chr19	+	2	2.83423	0.0943019	0.234167
ENSG00000182534.13	chr17	-	3	2.38428	0.0944512	0.234234
ENSG00000130822.16	chrX	-	2	2.81228	0.0955748	0.236714
ENSG00000282221.1	chr1	+	2	2.80667	0.0959032	0.23705
ENSG00000172638.13	chr11	-	3	2.36812	0.0959576	0.23705
ENSG00000135387.21	chr11	+	2	2.77617	0.0977105	0.241069
ENSG00000123358.20	chr12	+	3	2.34502	0.0981649	0.241879
ENSG00000128951.14	chr15	+	2	2.76041	0.0986585	0.242783
ENSG00000177885.15	chr17	-	2	2.75828	0.0987874	0.242789
ENSG00000069399.15	chr19	+	2	2.74498	0.0995993	0.244471
ENSG00000130304.17	chr19	+	2	2.73251	0.100362	0.246029
ENSG00000131788.16	chr1	-	2	2.72423	0.100874	0.246968
ENSG00000205133.12	chr8	-	2	2.71758	0.101288	0.247664
ENSG00000142937.12	chr1	+	2	2.70734	0.101928	0.248912
ENSG00000131408.15	chr19	+	2	2.68363	0.103427	0.252251
ENSG00000123124.14	chr8	+	2	2.67453	0.104009	0.253348
ENSG00000204520.14	chr6	+	2	2.67162	0.104197	0.253485
ENSG00000137507.11	chr11	-	2	2.6692	0.104351	0.253538
ENSG00000019144.19	chr11	+	4	2.06248	0.105223	0.255303
ENSG00000203739.4	chr1	-	2	2.65385	0.105344	0.255303
ENSG00000134982.17	chr5	+	2	2.64939	0.105634	0.255364
ENSG00000129657.16	chr17	+	3	2.27007	0.105636	0.255364
ENSG00000156414.19	chr14	+	2	2.6397	0.106269	0.256209
ENSG00000158864.13	chr1	+	2	2.63809	0.106374	0.256209
ENSG00000138674.17	chr4	-	2	2.63788	0.106388	0.256209
ENSG00000179820.16	chr19	+	2	2.63451	0.106611	0.256209
ENSG00000171385.10	chr1	-	2	2.63386	0.106653	0.256209
ENSG00000247271.7	chr11	+	2	2.6314	0.106815	0.256277
ENSG00000187778.14	chr12	-	2	2.61691	0.107777	0.258261
ENSG00000128272.16	chr22	+	2	2.61291	0.108044	0.258578
ENSG00000089157.16	chr12	-	2	2.61009	0.108234	0.258708
ENSG00000109016.17	chr17	+	2	2.60768	0.108395	0.258771
ENSG00000101333.18	chr20	+	2	2.60206	0.108773	0.259351
ENSG00000142875.19	chr1	+	2	2.5952	0.109236	0.260105
ENSG00000068024.17	chr2	-	3	2.23473	0.109361	0.260105
ENSG00000251562.8	chr11	+	2	2.58945	0.109626	0.260388
ENSG00000117114.20	chr1	+	3	2.23109	0.109752	0.260388
ENSG00000108924.14	chr17	+	3	2.22503	0.110406	0.261617
ENSG00000179348.12	chr3	-	2	2.56373	0.111391	0.263069
ENSG00000055118.16	chr7	-	2	2.56335	0.111417	0.263069
ENSG00000132906.18	chr1	-	2	2.56315	0.11143	0.263069
ENSG00000100412.17	chr22	+	2	2.56069	0.111601	0.263148
ENSG00000149115.14	chr11	-	3	2.19413	0.113805	0.268014
ENSG00000080546.13	chr6	-	2	2.52203	0.114318	0.268489
ENSG00000014216.16	chr11	+	2	2.52123	0.114375	0.268489
ENSG00000110911.17	chr12	-	2	2.51938	0.114507	0.268489
ENSG00000173221.14	chr5	-	2	2.51811	0.114598	0.268489
ENSG00000152894.15	chr6	-	2	2.51658	0.114706	0.268489
ENSG00000168386.18	chr3	-	2	2.51215	0.115029	0.268916
ENSG00000158435.8	chr2	+	2	2.49878	0.115987	0.270825
ENSG00000119912.18	chr10	-	2	2.49365	0.116359	0.271363
ENSG00000198853.12	chr9	+	2	2.48619	0.116903	0.2723
ENSG00000173065.13	chr17	-	2	2.48196	0.117212	0.272467
ENSG00000163156.12	chr1	+	2	2.48131	0.117259	0.272467
ENSG00000151503.13	chr11	-	2	2.46604	0.118384	0.274748
ENSG00000116685.16	chr1	-	2	2.45602	0.119144	0.276102
ENSG00000234520.6	chr7	-	2	2.45441	0.11926	0.276102
ENSG00000178796.13	chr1	+	2	2.45156	0.119462	0.276102
ENSG00000047315.17	chr4	+	2	2.45046	0.119544	0.276102
ENSG00000107372.13	chr9	-	2	2.44809	0.119722	0.276181
ENSG00000286054.1	chr21	+	2	2.43838	0.120453	0.277221
ENSG00000179632.10	chr8	+	2	2.43825	0.120462	0.277221
ENSG00000163347.6	chr3	-	2	2.43149	0.120973	0.27784
ENSG00000167106.12	chr9	-	3	2.13148	0.121021	0.27784
ENSG00000116731.22	chr1	+	2	2.42716	0.121302	0.278019
ENSG00000113645.15	chr5	+	2	2.42603	0.121389	0.278019
ENSG00000135926.15	chr2	-	4	1.94725	0.121994	0.278356
ENSG00000101752.12	chr18	+	3	2.12247	0.122096	0.278356
ENSG00000147255.19	chrX	-	2	2.41574	0.122174	0.278356
ENSG00000183255.12	chr21	-	2	2.41438	0.122279	0.278356
ENSG00000196914.9	chr11	+	2	2.41404	0.122305	0.278356
ENSG00000134758.14	chr18	+	2	2.4113	0.122516	0.278356
ENSG00000145362.20	chr4	+	5	1.82889	0.122552	0.278356
ENSG00000027075.15	chr14	+	2	2.40299	0.123157	0.278948
ENSG00000163872.16	chr3	+	2	2.40201	0.123233	0.278948
ENSG00000130779.22	chr12	-	2	2.4018	0.123249	0.278948
ENSG00000124155.18	chr20	+	3	2.11153	0.123414	0.278991
ENSG00000172403.11	chr4	+	2	2.39119	0.124089	0.280186
ENSG00000090006.18	chr19	+	3	2.09618	0.125288	0.282561
ENSG00000186815.13	chr12	+	2	2.36069	0.12648	0.284769
ENSG00000079459.13	chr8	+	2	2.35964	0.126564	0.284769
ENSG00000205189.12	chr8	+	2	2.33771	0.128327	0.288398
ENSG00000163635.20	chr3	+	2	2.32693	0.129204	0.290029
ENSG00000106070.20	chr7	-	2	2.31454	0.130221	0.291168
ENSG00000117298.16	chr1	-	3	2.05606	0.130324	0.291168
ENSG00000213160.10	chr2	+	2	2.31107	0.130507	0.291168
ENSG00000161013.17	chr5	-	2	2.31016	0.130582	0.291168
ENSG00000198521.12	chr19	-	2	2.31016	0.130582	0.291168
ENSG00000134243.12	chr1	-	3	2.05372	0.130623	0.291168
ENSG00000173372.17	chr1	+	2	2.30751	0.130802	0.291228
ENSG00000148180.21	chr9	+	6	1.70847	0.131199	0.29165
ENSG00000143013.13	chr1	+	2	2.30156	0.131296	0.29165
ENSG00000236404.10	chr9	-	3	2.04685	0.131508	0.291784
ENSG00000269313.5	chrX	+	2	2.28547	0.132641	0.293957
ENSG00000196588.20	chr22	-	2	2.28099	0.133018	0.294453
ENSG00000083857.14	chr4	-	2	2.27398	0.133611	0.295425
ENSG00000156508.19	chr6	-	3	2.02579	0.134257	0.29651
ENSG00000156110.15	chr10	+	2	2.26453	0.134415	0.296518
ENSG00000124440.16	chr19	+	3	2.01847	0.135227	0.297965
ENSG00000160299.17	chr21	+	2	2.25197	0.135507	0.298241
ENSG00000196136.18	chr14	+	2	2.24917	0.135746	0.298423
ENSG00000168916.15	chr5	-	3	2.01317	0.135932	0.29849
ENSG00000131370.16	chr3	-	2	2.24085	0.136455	0.299295
ENSG00000158321.18	chr7	+	3	2.00121	0.13754	0.301175
ENSG00000239523.6	chr3	+	2	2.22743	0.137626	0.301175
ENSG00000168385.18	chr2	+	2	2.20575	0.139542	0.30502
ENSG00000134504.14	chr18	-	2	2.1973	0.140297	0.30632
ENSG00000174282.12	chr17	-	2	2.19186	0.140786	0.307038
ENSG00000265107.3	chr1	-	2	2.18339	0.141565	0.308386
ENSG00000159840.16	chr7	+	3	1.9608	0.143113	0.311208
ENSG00000114473.14	chr3	-	3	1.9596	0.143282	0.311208
ENSG00000137486.17	chr11	-	2	2.16237	0.143468	0.311208
ENSG00000165458.14	chr11	+	2	2.16191	0.143509	0.311208
ENSG00000083720.13	chr5	-	2	2.15876	0.1438	0.311485
ENSG00000132405.19	chr4	+	2	2.15329	0.144305	0.311987
ENSG00000012223.13	chr3	-	2	2.15273	0.144357	0.311987
ENSG00000142541.18	chr19	+	2	2.14588	0.144992	0.313007
ENSG00000102226.10	chrX	+	2	2.13838	0.145692	0.314165
ENSG00000166949.17	chr15	+	2	2.13201	0.146289	0.315097
ENSG00000123600.20	chr2	-	2	2.12611	0.146845	0.315939
ENSG00000067208.14	chr1	-	2	2.12314	0.147126	0.316189
ENSG00000168264.11	chr1	-	2	2.11681	0.147725	0.317122
ENSG00000136848.17	chr9	+	4	1.79341	0.148422	0.318261
ENSG00000132153.15	chr3	+	2	2.10114	0.149223	0.319621
ENSG00000092068.20	chr14	-	2	2.08758	0.150533	0.322067
ENSG00000146729.10	chr7	+	2	2.08327	0.150953	0.322605
ENSG00000169375.16	chr15	-	2	2.07825	0.151443	0.323292
ENSG00000175920.18	chr4	+	2	2.07548	0.151714	0.323511
ENSG00000185033.14	chr15	+	2	2.0735	0.151908	0.323564
ENSG00000032444.17	chr19	+	2	2.05443	0.153792	0.327169
ENSG00000213465.8	chr11	+	2	2.05293	0.153942	0.327169
ENSG00000170365.10	chr4	+	2	2.04962	0.154272	0.327507
ENSG00000077044.11	chr2	+	2	2.0456	0.154673	0.32798
ENSG00000180628.15	chr10	+	2	2.04397	0.154837	0.32798
ENSG00000155324.10	chr5	+	2	2.03424	0.155816	0.329271
ENSG00000115459.18	chr2	+	2	2.03387	0.155853	0.329271
ENSG00000278189.1	chr21	+	2	2.03295	0.155961	0.329271
ENSG00000205678.8	chr4	-	2	2.01551	0.15772	0.332618
ENSG00000101608.13	chr18	+	2	2.01232	0.15806	0.332968
ENSG00000198105.16	chr10	-	2	2.00783	0.15851	0.33355
ENSG00000135636.14	chr2	+	2	2.00443	0.158861	0.333921
ENSG00000274750.2	chr6	+	2	1.98383	0.161004	0.338056
ENSG00000111341.10	chr12	-	2	1.98107	0.161305	0.338107
ENSG00000012171.20	chr3	+	2	1.98024	0.161381	0.338107
ENSG00000175832.13	chr17	-	2	1.97414	0.162024	0.338767
ENSG00000167994.13	chr11	-	2	1.97165	0.162287	0.338767
ENSG00000148339.12	chr9	+	2	1.97087	0.162371	0.338767
ENSG00000099797.15	chr19	+	2	1.96952	0.162512	0.338767
ENSG00000040341.18	chr8	-	2	1.96889	0.16258	0.338767
ENSG00000137275.16	chr6	+	2	1.96711	0.162769	0.338792
ENSG00000004776.13	chr19	-	2	1.94218	0.165452	0.343758
ENSG00000179526.17	chr8	-	3	1.81297	0.165513	0.343758
ENSG00000138639.18	chr4	+	2	1.93012	0.166752	0.345955
ENSG00000139323.14	chr12	-	2	1.9258	0.167225	0.346562
ENSG00000130255.13	chr19	+	2	1.92143	0.167705	0.347181
ENSG00000243678.12	chr17	+	2	1.91829	0.16805	0.347521
ENSG00000186439.14	chr6	-	2	1.91292	0.168642	0.348346
ENSG00000184182.19	chr2	+	2	1.91138	0.168812	0.348346
ENSG00000070961.16	chr12	-	2	1.90589	0.169422	0.349228
ENSG00000270647.6	chr17	+	2	1.89892	0.170199	0.350453
ENSG00000169813.16	chr10	-	3	1.77951	0.171057	0.351841
ENSG00000125844.16	chr20	-	2	1.88422	0.171852	0.353098
ENSG00000134884.15	chr13	-	2	1.8785	0.1725	0.354051
ENSG00000076242.16	chr3	+	2	1.86588	0.173941	0.355987
ENSG00000112576.13	chr6	-	2	1.86587	0.173941	0.355987
ENSG00000182796.14	chr12	+	2	1.86473	0.174072	0.355987
ENSG00000177565.18	chr3	-	2	1.86373	0.174187	0.355987
ENSG00000178127.13	chr18	+	3	1.75831	0.174664	0.356583
ENSG00000122359.18	chr10	-	2	1.85776	0.174874	0.356632
ENSG00000125741.5	chr19	-	2	1.84658	0.176169	0.35889
ENSG00000130024.15	chr6	-	2	1.84171	0.176737	0.359435
ENSG00000091428.18	chr2	+	2	1.84098	0.176822	0.359435
ENSG00000162458.13	chr1	+	2	1.83583	0.177426	0.359435
ENSG00000224051.7	chr1	+	2	1.83577	0.177433	0.359435
ENSG00000149557.14	chr11	-	4	1.65155	0.177556	0.359435
ENSG00000132849.21	chr1	+	2	1.83353	0.177696	0.359435
ENSG00000071242.12	chr6	-	2	1.83239	0.177829	0.359435
ENSG00000106263.18	chr7	+	2	1.8314	0.177947	0.359435
ENSG00000164125.16	chr4	-	2	1.82989	0.178124	0.359435
ENSG00000264247.2	chr18	-	2	1.82514	0.178685	0.360189
ENSG00000134686.18	chr1	-	2	1.81772	0.179565	0.361583
ENSG00000111245.17	chr12	-	3	1.72021	0.181356	0.364806
ENSG00000106823.12	chr9	-	2	1.79716	0.182031	0.36578
ENSG00000175182.15	chr3	+	2	1.79468	0.182331	0.365998
ENSG00000116857.17	chr1	-	2	1.79076	0.182807	0.36657
ENSG00000103495.14	chr16	+	2	1.78763	0.183188	0.366949
ENSG00000103994.18	chr15	-	3	1.70278	0.184485	0.369163
ENSG00000162591.16	chr1	-	2	1.75732	0.186923	0.373651
ENSG00000125733.18	chr19	+	2	1.75427	0.187304	0.374023
ENSG00000169641.13	chr1	-	2	1.75124	0.187683	0.374389
ENSG00000060237.19	chr12	+	2	1.74636	0.188295	0.37522
ENSG00000115461.5	chr2	-	2	1.74248	0.188785	0.375806
ENSG00000224861.1	chr14	-	2	1.74071	0.189008	0.37586
ENSG00000177354.12	chr10	+	2	1.73413	0.189841	0.376936
ENSG00000099341.12	chr19	+	2	1.73333	0.189942	0.376936
ENSG00000196141.14	chr2	+	2	1.72688	0.190765	0.378009
ENSG00000106211.10	chr7	+	2	1.726	0.190878	0.378009
ENSG00000008324.12	chr3	+	2	1.72381	0.191157	0.378172
ENSG00000128585.18	chr7	+	2	1.71843	0.191847	0.379146
ENSG00000144711.16	chr3	-	3	1.66174	0.192099	0.379252
ENSG00000075240.17	chr22	+	2	1.69883	0.194387	0.383375
ENSG00000085831.16	chr1	-	3	1.64743	0.194828	0.383642
ENSG00000160194.18	chr21	+	2	1.69427	0.194984	0.383642
ENSG00000241878.11	chr22	-	2	1.69231	0.195241	0.383642
ENSG00000120899.18	chr8	+	2	1.69168	0.195323	0.383642
ENSG00000140743.8	chr16	-	2	1.67219	0.197903	0.388311
ENSG00000137070.18	chr9	+	2	1.66928	0.198292	0.388676
ENSG00000160360.13	chr9	+	3	1.62793	0.198612	0.388906
ENSG00000169071.15	chr9	-	2	1.66512	0.19885	0.388976
ENSG00000198947.17	chrX	-	3	1.62353	0.199474	0.389798
ENSG00000105227.16	chr19	-	2	1.65877	0.199703	0.389847
ENSG00000112624.12	chr6	+	2	1.65577	0.200107	0.38997
ENSG00000211448.13	chr14	-	2	1.6553	0.200172	0.38997
ENSG00000119335.17	chr9	+	2	1.65363	0.200396	0.39001
ENSG00000171604.12	chr5	+	2	1.65131	0.200711	0.390226
ENSG00000152700.14	chr5	-	2	1.64113	0.202097	0.392523
ENSG00000159023.22	chr1	+	2	1.62857	0.203823	0.395475
ENSG00000121281.13	chr16	+	3	1.59946	0.204265	0.395931
ENSG00000127472.11	chr1	+	2	1.62169	0.204776	0.396521
ENSG00000122643.22	chr7	-	2	1.61635	0.205519	0.397247
ENSG00000093183.14	chr3	-	2	1.61562	0.20562	0.397247
ENSG00000177628.16	chr1	-	2	1.61453	0.205773	0.397247
ENSG00000186577.14	chr6	-	2	1.61115	0.206246	0.39776
ENSG00000138162.19	chr10	+	4	1.52673	0.207584	0.399938
ENSG00000073849.16	chr3	+	3	1.58032	0.208157	0.400639
ENSG00000067141.17	chr15	+	2	1.59343	0.208746	0.401371
ENSG00000182177.14	chr2	-	2	1.57585	0.211262	0.405801
ENSG00000177200.17	chr16	+	4	1.50978	0.21201	0.40683
ENSG00000067182.8	chr12	-	2	1.56574	0.212725	0.407793
ENSG00000092931.11	chr17	+	2	1.55387	0.214458	0.410706
ENSG00000136167.15	chr13	-	2	1.54498	0.215767	0.412485
ENSG00000179051.14	chr1	-	2	1.54464	0.215818	0.412485
ENSG00000010818.10	chr6	-	2	1.54152	0.216286	0.412804
ENSG00000177685.17	chr11	+	2	1.54061	0.216415	0.412804
ENSG00000177606.8	chr1	-	2	1.53705	0.21695	0.413412
ENSG00000141971.13	chr19	+	2	1.5301	0.217981	0.414965
ENSG00000169155.10	chr9	+	2	1.52841	0.218235	0.415036
ENSG00000160801.14	chr3	+	2	1.51639	0.220044	0.418062
ENSG00000157514.16	chrX	-	2	1.51425	0.220369	0.418264
ENSG00000171425.10	chr19	+	2	1.512	0.22071	0.418498
ENSG00000100897.18	chr14	+	2	1.50927	0.221126	0.418871
ENSG00000179915.24	chr2	-	3	1.51552	0.221899	0.419922
ENSG00000136603.14	chr3	+	2	1.50065	0.222443	0.420474
ENSG00000166532.16	chr12	+	2	1.49711	0.222986	0.420474
ENSG00000136237.19	chr7	-	2	1.49692	0.223016	0.420474
ENSG00000167491.17	chr19	+	2	1.49462	0.22337	0.420474
ENSG00000115963.14	chr2	-	2	1.49387	0.223486	0.420474
ENSG00000129353.15	chr19	+	2	1.49373	0.223507	0.420474
ENSG00000178031.18	chr9	+	2	1.48612	0.224685	0.422275
ENSG00000127838.14	chr2	+	3	1.50155	0.224981	0.422417
ENSG00000110422.12	chr11	+	2	1.48061	0.225541	0.422986
ENSG00000131759.18	chr17	+	3	1.4982	0.225725	0.422986
ENSG00000196712.18	chr17	+	2	1.47667	0.226157	0.423381
ENSG00000147065.17	chrX	+	2	1.47408	0.226563	0.423728
ENSG00000188312.14	chr9	+	2	1.46621	0.227801	0.425627
ENSG00000008294.21	chr17	-	2	1.45831	0.229051	0.427286
ENSG00000150527.17	chr14	+	2	1.45779	0.229134	0.427286
ENSG00000197050.11	chr19	+	2	1.45356	0.229808	0.427899
ENSG00000166963.13	chr15	+	2	1.45292	0.229909	0.427899
ENSG00000204217.15	chr2	+	2	1.44972	0.230422	0.428437
ENSG00000103043.15	chr16	-	2	1.44541	0.231112	0.429304
ENSG00000153815.17	chr16	+	2	1.44123	0.231785	0.430137
ENSG00000124380.11	chr2	+	2	1.43838	0.232244	0.430572
ENSG00000072062.15	chr19	-	2	1.43672	0.232513	0.430655
ENSG00000121933.19	chr1	-	3	1.46333	0.23363	0.43209
ENSG00000188643.11	chr1	-	2	1.42657	0.234162	0.43209
ENSG00000084234.18	chr11	+	3	1.46095	0.234181	0.43209
ENSG00000225377.6	chr20	-	2	1.4264	0.234189	0.43209
ENSG00000156650.14	chr10	+	2	1.4201	0.235221	0.433576
ENSG00000134201.12	chr1	+	2	1.41661	0.235794	0.434214
ENSG00000162434.13	chr1	-	2	1.41213	0.236534	0.435159
ENSG00000146834.14	chr7	+	2	1.40925	0.237009	0.435615
ENSG00000176155.19	chr17	-	2	1.405	0.237716	0.436495
ENSG00000126804.13	chr14	+	2	1.40141	0.238313	0.436909
ENSG00000158352.17	chrX	-	2	1.4009	0.238397	0.436909
ENSG00000178951.9	chr19	-	2	1.38482	0.241098	0.441437
ENSG00000178104.19	chr1	+	3	1.42892	0.241714	0.442143
ENSG00000141524.17	chr17	-	2	1.37691	0.242441	0.44305
ENSG00000037241.7	chr5	+	2	1.37352	0.243018	0.443681
ENSG00000182667.14	chr11	+	2	1.37104	0.243442	0.444032
ENSG00000102967.12	chr16	+	2	1.36952	0.243713	0.444104
ENSG00000154678.18	chr7	-	2	1.3593	0.245463	0.445773
ENSG00000135250.17	chr7	-	3	1.4127	0.245609	0.445773
ENSG00000132819.17	chr20	+	2	1.35744	0.245785	0.445773
ENSG00000095066.12	chr19	-	3	1.41148	0.245905	0.445773
ENSG00000113648.16	chr5	-	2	1.35648	0.24595	0.445773
ENSG00000104870.13	chr19	+	2	1.35605	0.246024	0.445773
ENSG00000005302.19	chrX	+	2	1.35332	0.246498	0.445821
ENSG00000125398.8	chr17	+	2	1.35322	0.246515	0.445821
ENSG00000131711.15	chr5	+	2	1.34229	0.248424	0.448849
ENSG00000127863.16	chr13	+	2	1.33129	0.250364	0.451928
ENSG00000105568.18	chr19	+	2	1.32014	0.252348	0.454414
ENSG00000196535.17	chr17	-	2	1.31975	0.252419	0.454414
ENSG00000018625.15	chr1	+	2	1.31856	0.252632	0.454414
ENSG00000116194.13	chr1	-	2	1.31738	0.252844	0.454414
ENSG00000185567.7	chr14	-	2	1.31692	0.252926	0.454414
ENSG00000168883.20	chr2	+	2	1.30984	0.254201	0.455925
ENSG00000072609.18	chr12	-	2	1.3096	0.254243	0.455925
ENSG00000204590.12	chr6	-	2	1.30152	0.255708	0.458123
ENSG00000180155.20	chr8	-	2	1.29842	0.256272	0.458705
ENSG00000196531.14	chr12	-	3	1.3674	0.25685	0.45897
ENSG00000159176.14	chr1	-	2	1.29499	0.256899	0.45897
ENSG00000164692.18	chr7	+	5	1.33076	0.257905	0.460338
ENSG00000163848.20	chr3	-	2	1.28148	0.259385	0.462549
ENSG00000116128.11	chr1	+	2	1.27828	0.259978	0.462752
ENSG00000133818.14	chr11	-	2	1.27826	0.259981	0.462752
ENSG00000116774.12	chr1	+	2	1.27427	0.260723	0.463641
ENSG00000075234.17	chr22	+	2	1.26892	0.261723	0.464989
ENSG00000198517.10	chr7	+	2	1.2661	0.26225	0.465244
ENSG00000122390.19	chr16	+	2	1.26556	0.262352	0.465244
ENSG00000124535.16	chr6	+	2	1.26005	0.263389	0.466219
ENSG00000153904.21	chr1	-	2	1.25948	0.263498	0.466219
ENSG00000058262.10	chr3	+	2	1.258	0.263776	0.466219
ENSG00000186104.11	chr11	-	2	1.25616	0.264124	0.466219
ENSG00000118596.12	chr12	+	2	1.25548	0.264254	0.466219
ENSG00000158169.13	chr9	-	2	1.25491	0.264361	0.466219
ENSG00000008710.20	chr16	-	2	1.25177	0.264958	0.466843
ENSG00000081189.16	chr5	-	2	1.24444	0.266356	0.467808
ENSG00000150401.15	chr13	-	2	1.24391	0.266458	0.467808
ENSG00000068028.17	chr3	-	2	1.2434	0.266554	0.467808
ENSG00000126461.15	chr19	+	2	1.24301	0.266629	0.467808
ENSG00000090924.15	chr19	+	2	1.2425	0.266726	0.467808
ENSG00000188191.15	chr7	-	2	1.23369	0.268422	0.470352
ENSG00000101191.17	chr20	-	2	1.22653	0.26981	0.472353
ENSG00000117419.16	chr1	-	2	1.22429	0.270246	0.472684
ENSG00000018189.13	chr4	+	2	1.21723	0.271627	0.474666
ENSG00000113312.11	chr5	+	2	1.21433	0.272196	0.475228
ENSG00000116871.15	chr1	+	2	1.21231	0.272593	0.475488
ENSG00000181894.15	chr19	-	2	1.20568	0.273903	0.477338
ENSG00000196405.13	chr14	+	3	1.30117	0.274227	0.477469
ENSG00000124313.18	chrX	-	2	1.19993	0.275047	0.478461
ENSG00000102804.15	chr13	-	4	1.29641	0.27576	0.479267
ENSG00000167074.15	chr22	+	2	1.19345	0.276342	0.479458
ENSG00000143401.15	chr1	-	2	1.19331	0.27637	0.479458
ENSG00000099968.18	chr22	+	3	1.29121	0.276944	0.480019
ENSG00000124181.14	chr20	+	2	1.18601	0.277837	0.481133
ENSG00000183010.17	chr17	-	2	1.18197	0.278654	0.481866
ENSG00000082641.16	chr17	+	3	1.28458	0.278763	0.481866
ENSG00000162670.11	chr1	-	2	1.17462	0.280149	0.483825
ENSG00000116754.13	chr1	+	2	1.173	0.280479	0.48396
ENSG00000031003.10	chr5	-	2	1.16982	0.28113	0.484646
ENSG00000187239.17	chr9	-	2	1.16467	0.282188	0.486032
ENSG00000146592.17	chr7	+	2	1.15456	0.284278	0.489193
ENSG00000110429.14	chr11	-	2	1.15033	0.285159	0.490113
ENSG00000213741.11	chr14	-	2	1.14912	0.285411	0.490113
ENSG00000164850.15	chr7	+	2	1.14741	0.285769	0.490113
ENSG00000181031.16	chr17	-	2	1.14709	0.285835	0.490113
ENSG00000139687.16	chr13	+	2	1.14202	0.286898	0.491164
ENSG00000274104.1	chr19	-	2	1.14172	0.286963	0.491164
ENSG00000170634.13	chr2	+	3	1.25352	0.287459	0.491164
ENSG00000277443.3	chr6	+	2	1.13887	0.287561	0.491164
ENSG00000179988.15	chr10	+	2	1.13798	0.28775	0.491164
ENSG00000134775.15	chr18	+	2	1.13686	0.287986	0.491164
ENSG00000084674.15	chr2	-	2	1.12881	0.289702	0.493652
ENSG00000232310.8	chr6	-	2	1.12304	0.290936	0.495039
ENSG00000147862.17	chr9	-	2	1.12254	0.291032	0.495039
ENSG00000140545.15	chr15	-	2	1.11398	0.292872	0.497723
ENSG00000112183.15	chr6	+	2	1.11279	0.293129	0.497723
ENSG00000065882.16	chr4	+	2	1.10981	0.293774	0.498026
ENSG00000108984.15	chr17	+	2	1.10956	0.293827	0.498026
ENSG00000134954.14	chr11	-	2	1.1052	0.294776	0.498988
ENSG00000130158.14	chr19	-	2	1.10455	0.294916	0.498988
ENSG00000134287.10	chr12	-	2	1.09977	0.29596	0.500313
ENSG00000060656.20	chr1	+	2	1.09843	0.296253	0.500367
ENSG00000160808.11	chr3	-	2	1.09683	0.296615	0.500538
ENSG00000187954.13	chr8	-	2	1.08818	0.298511	0.503295
ENSG00000138326.21	chr10	+	2	1.08591	0.299013	0.503698
ENSG00000114854.8	chr3	-	2	1.08244	0.299787	0.504416
ENSG00000154710.18	chr7	+	2	1.08162	0.299965	0.504416
ENSG00000128739.23	chr15	+	3	1.20263	0.302302	0.507788
ENSG00000108654.16	chr17	-	4	1.22016	0.302501	0.507788
ENSG00000112893.10	chr5	+	2	1.06814	0.302988	0.508161
ENSG00000231607.13	chr13	-	2	1.06486	0.303729	0.508958
ENSG00000145860.12	chr5	-	2	1.06032	0.304757	0.510235
ENSG00000160972.9	chr8	+	2	1.05908	0.305039	0.510261
ENSG00000169862.19	chr5	-	2	1.05711	0.305488	0.510321
ENSG00000120690.16	chr13	-	2	1.05659	0.305607	0.510321
ENSG00000143549.21	chr1	-	3	1.18529	0.307544	0.513108
ENSG00000068724.17	chr2	+	2	1.045	0.308266	0.513866
ENSG00000075239.14	chr11	+	3	1.17704	0.310054	0.516344
ENSG00000135821.19	chr1	-	2	1.03625	0.310291	0.516344
ENSG00000079805.18	chr19	+	2	1.03212	0.311255	0.517499
ENSG00000157654.19	chr9	+	7	1.18714	0.311538	0.51752
ENSG00000101871.16	chrX	-	2	1.02654	0.312561	0.51837
ENSG00000179833.4	chr2	-	2	1.02636	0.312605	0.51837
ENSG00000138413.14	chr2	-	2	1.02527	0.312861	0.51837
ENSG00000128789.21	chr18	+	2	1.0109	0.316264	0.523133
ENSG00000197580.13	chr11	+	2	1.01021	0.316431	0.523133
ENSG00000100813.14	chr14	-	2	1.0088	0.316766	0.523133
ENSG00000197461.13	chr7	-	2	1.00855	0.316827	0.523133
ENSG00000092871.17	chr17	-	2	1.00687	0.317228	0.523344
ENSG00000158417.11	chr2	+	2	1.00405	0.317906	0.523364
ENSG00000149091.15	chr11	+	4	1.17815	0.318211	0.523364
ENSG00000047849.21	chr3	-	4	1.17719	0.318578	0.523364
ENSG00000052126.15	chr12	+	2	1.001	0.318639	0.523364
ENSG00000156030.13	chr14	-	2	1.00061	0.318732	0.523364
ENSG00000092969.12	chr1	+	2	1.00004	0.318878	0.523364
ENSG00000132466.19	chr4	-	2	0.99509	0.320067	0.524866
ENSG00000089225.20	chr12	-	4	1.16768	0.322245	0.52775
ENSG00000174197.16	chr15	+	2	0.985607	0.322376	0.52775
ENSG00000138061.12	chr2	-	2	0.982536	0.323137	0.528544
ENSG00000275832.5	chr17	+	3	1.13104	0.324502	0.530042
ENSG00000198276.16	chr20	-	2	0.976024	0.324733	0.530042
ENSG00000153250.20	chr2	-	3	1.12983	0.32489	0.530042
ENSG00000168958.20	chr2	+	2	0.974033	0.325225	0.530042
ENSG00000117528.14	chr1	+	2	0.972966	0.325489	0.530042
ENSG00000167705.12	chr17	-	2	0.971126	0.325946	0.530042
ENSG00000241058.4	chr10	-	2	0.970857	0.326013	0.530042
ENSG00000172831.14	chr16	+	2	0.969873	0.326265	0.530042
ENSG00000167740.10	chr17	+	2	0.967381	0.326877	0.530148
ENSG00000166451.14	chr16	+	2	0.967359	0.326883	0.530148
ENSG00000099875.16	chr19	-	2	0.965261	0.327407	0.5305
ENSG00000067064.12	chr10	-	2	0.964271	0.327654	0.5305
ENSG00000175216.15	chr11	-	2	0.956035	0.329722	0.533398
ENSG00000108389.9	chr17	-	2	0.943933	0.332792	0.537912
ENSG00000168675.19	chr18	+	5	1.14813	0.333537	0.53866
ENSG00000163947.12	chr3	-	3	1.10174	0.334056	0.539045
ENSG00000145592.14	chr5	-	2	0.933354	0.33551	0.540512
ENSG00000127914.19	chr7	+	2	0.933273	0.335529	0.540512
ENSG00000271952.2	chr2	+	2	0.929573	0.336486	0.541566
ENSG00000205560.13	chr22	-	2	0.92825	0.336829	0.541566
ENSG00000105607.13	chr19	+	2	0.927472	0.337031	0.541566
ENSG00000266094.8	chr1	+	2	0.925451	0.337556	0.541956
ENSG00000215252.11	chr15	-	2	0.924205	0.337881	0.542023
ENSG00000118194.20	chr1	-	7	1.13691	0.33943	0.543843
ENSG00000118900.15	chr16	+	2	0.917598	0.339608	0.543843
ENSG00000183072.10	chr5	-	2	0.916614	0.339867	0.543843
ENSG00000118263.15	chr2	-	2	0.909895	0.341638	0.546221
ENSG00000119403.15	chr9	-	2	0.907613	0.342242	0.546278
ENSG00000205542.11	chrX	+	2	0.90761	0.342243	0.546278
ENSG00000121769.8	chr1	-	2	0.902118	0.343703	0.548152
ENSG00000104205.16	chr8	+	2	0.895064	0.345591	0.549792
ENSG00000197111.16	chr12	+	3	1.06634	0.345978	0.549792
ENSG00000108219.15	chr10	+	2	0.893219	0.346088	0.549792
ENSG00000075391.17	chr1	+	2	0.892764	0.34621	0.549792
ENSG00000198270.13	chr12	-	2	0.891756	0.346487	0.549792
ENSG00000173848.19	chr10	+	2	0.891611	0.346521	0.549792
ENSG00000104853.16	chr19	+	2	0.890444	0.346836	0.549792
ENSG00000086200.17	chr5	+	2	0.889243	0.34716	0.549792
ENSG00000072195.15	chr2	+	4	1.105	0.347313	0.549792
ENSG00000161513.12	chr17	-	2	0.883251	0.348785	0.551667
ENSG00000099917.17	chr22	+	3	1.05638	0.349408	0.551684
ENSG00000100664.11	chr14	+	2	0.880622	0.349501	0.551684
ENSG00000250608.2	chr3	-	2	0.880045	0.349659	0.551684
ENSG00000152242.11	chr18	+	2	0.876423	0.35065	0.552792
ENSG00000246695.8	chr12	-	2	0.868205	0.352912	0.555901
ENSG00000166091.21	chr14	+	2	0.86571	0.353603	0.556532
ENSG00000205090.9	chr1	-	2	0.864312	0.35399	0.556585
ENSG00000110811.20	chr12	+	2	0.862939	0.354372	0.556585
ENSG00000125746.18	chr19	-	2	0.862453	0.354507	0.556585
ENSG00000198042.11	chr8	+	2	0.861363	0.354811	0.556605
ENSG00000081870.12	chr1	-	2	0.860245	0.355122	0.556628
ENSG00000065320.9	chr17	+	2	0.858155	0.355716	0.556628
ENSG00000165119.21	chr9	-	2	0.856711	0.356109	0.556628
ENSG00000179409.11	chr17	-	2	0.855807	0.356363	0.556628
ENSG00000075651.16	chr3	-	2	0.855701	0.356392	0.556628
ENSG00000078596.11	chrX	-	2	0.855077	0.356567	0.556628
ENSG00000151726.15	chr4	-	3	1.03269	0.357714	0.557964
ENSG00000184347.15	chr5	-	2	0.84714	0.358813	0.559002
ENSG00000273899.5	chr22	+	2	0.846081	0.359103	0.559002
ENSG00000173511.10	chr11	+	2	0.845471	0.359275	0.559002
ENSG00000073417.15	chr15	+	2	0.844517	0.359546	0.559002
ENSG00000140650.12	chr16	+	2	0.839924	0.360852	0.560578
ENSG00000082397.18	chr18	-	2	0.838873	0.361152	0.560589
ENSG00000178860.9	chr8	-	2	0.837577	0.361522	0.56071
ENSG00000167701.14	chr8	+	2	0.835348	0.362168	0.561258
ENSG00000179583.20	chr16	+	4	1.06878	0.362567	0.561422
ENSG00000283154.2	chr3	+	2	0.829884	0.36373	0.562769
ENSG00000142230.13	chr19	+	3	1.01358	0.364548	0.56358
ENSG00000137962.13	chr1	-	2	0.824855	0.365184	0.564108
ENSG00000182199.11	chr12	+	3	1.01096	0.365494	0.564132
ENSG00000182903.16	chr4	-	2	0.820656	0.366404	0.565082
ENSG00000197182.14	chr22	+	3	1.00721	0.366855	0.565322
ENSG00000132646.11	chr20	-	2	0.814361	0.368244	0.567007
ENSG00000076864.19	chr1	-	2	0.811751	0.369011	0.567732
ENSG00000175699.15	chr14	+	2	0.810713	0.369316	0.567746
ENSG00000122786.20	chr7	+	4	1.05155	0.370031	0.568389
ENSG00000255248.9	chr11	-	3	0.991925	0.372458	0.571625
ENSG00000084070.12	chr1	+	2	0.799181	0.372734	0.571625
ENSG00000165795.23	chr14	-	3	0.985408	0.374871	0.574438
ENSG00000107771.17	chr10	+	2	0.790493	0.375338	0.574438
ENSG00000143353.12	chr1	+	2	0.790065	0.375467	0.574438
ENSG00000169946.14	chr8	+	2	0.787403	0.376271	0.575208
ENSG00000074181.9	chr19	-	2	0.785909	0.376723	0.57544
ENSG00000041880.15	chr3	+	2	0.784329	0.377202	0.575713
ENSG00000133619.17	chr7	+	2	0.78308	0.377581	0.575833
ENSG00000168646.13	chr17	-	2	0.773573	0.380485	0.579801
ENSG00000059145.19	chr16	-	2	0.771543	0.381109	0.580291
ENSG00000112759.19	chr6	+	4	1.02457	0.38198	0.581156
ENSG00000104805.16	chr19	+	3	0.959993	0.384438	0.584078
ENSG00000134871.19	chr13	+	2	0.760564	0.38451	0.584078
ENSG00000102606.18	chr13	+	4	1.01724	0.385284	0.58471
ENSG00000100242.15	chr22	-	3	0.955998	0.385964	0.58471
ENSG00000141905.19	chr19	+	7	1.05921	0.386085	0.58471
ENSG00000102531.16	chr13	+	3	0.955522	0.386147	0.58471
ENSG00000104881.16	chr19	-	2	0.753648	0.386675	0.585048
ENSG00000100364.19	chr22	-	2	0.750737	0.387591	0.585713
ENSG00000204438.11	chr6	-	2	0.750312	0.387725	0.585713
ENSG00000114439.19	chr3	+	2	0.749258	0.388058	0.585754
ENSG00000181513.15	chr17	+	2	0.740261	0.390915	0.589124
ENSG00000115183.15	chr2	+	2	0.739995	0.391	0.589124
ENSG00000196576.16	chr22	-	2	0.739329	0.391213	0.589124
ENSG00000069122.19	chr6	-	2	0.737298	0.391863	0.58964
ENSG00000240849.11	chr20	-	2	0.729975	0.394219	0.592486
ENSG00000065427.15	chr16	-	2	0.7295	0.394372	0.592486
ENSG00000129521.15	chr14	-	2	0.728103	0.394825	0.592701
ENSG00000156802.13	chr8	-	2	0.726183	0.395447	0.593171
ENSG00000171444.18	chr5	-	3	0.93068	0.395779	0.593204
ENSG00000163092.21	chr2	+	2	0.716466	0.398629	0.597009
ENSG00000169926.11	chr15	+	2	0.714371	0.399308	0.59756
ENSG00000137801.11	chr15	+	2	0.712141	0.400053	0.598037
ENSG00000255399.4	chr12	+	2	0.711072	0.400397	0.598037
ENSG00000144366.16	chr2	+	2	0.710569	0.400563	0.598037
ENSG00000138735.16	chr4	-	2	0.708795	0.40115	0.598447
ENSG00000185532.20	chr10	+	2	0.704986	0.402415	0.599544
ENSG00000167978.17	chr16	+	4	0.979865	0.402511	0.599544
ENSG00000011451.21	chr19	-	3	0.910966	0.403595	0.600692
ENSG00000198034.11	chrX	-	2	0.697851	0.404801	0.601772
ENSG00000070778.13	chr14	-	2	0.697413	0.404948	0.601772
ENSG00000152601.17	chr3	+	2	0.695818	0.405485	0.602103
ENSG00000130054.5	chrX	+	2	0.69265	0.406554	0.603223
ENSG00000072518.22	chr11	+	2	0.691311	0.407007	0.603427
ENSG00000132635.17	chr20	-	2	0.688426	0.407985	0.60441
ENSG00000079432.8	chr19	+	2	0.68708	0.408443	0.604411
ENSG00000167460.17	chr19	+	3	0.898511	0.408616	0.604411
ENSG00000165192.14	chrX	-	2	0.677426	0.411751	0.608476
ENSG00000143799.14	chr1	-	2	0.676697	0.411999	0.608476
ENSG00000139842.15	chr13	+	2	0.674791	0.412657	0.608947
ENSG00000096696.14	chr6	+	2	0.673933	0.412953	0.608947
ENSG00000143702.16	chr1	-	2	0.670154	0.414263	0.610409
ENSG00000062716.13	chr17	+	2	0.668159	0.414965	0.610974
ENSG00000167291.16	chr17	-	2	0.664128	0.416365	0.612565
ENSG00000136574.18	chr8	+	3	0.875453	0.418069	0.6146
ENSG00000159251.8	chr15	-	4	0.945551	0.418899	0.614897
ENSG00000250159.7	chr5	-	2	0.656823	0.418935	0.614897
ENSG00000128487.18	chr17	+	2	0.655978	0.419234	0.614897
ENSG00000107897.20	chr10	-	2	0.648481	0.421898	0.618333
ENSG00000152556.17	chr12	+	5	0.972843	0.422264	0.618396
ENSG00000156011.17	chr8	-	3	0.861393	0.423944	0.619427
ENSG00000048707.15	chr1	+	2	0.642186	0.424156	0.619427
ENSG00000136100.14	chr13	-	2	0.641636	0.424354	0.619427
ENSG00000129116.19	chr4	+	3	0.860267	0.424418	0.619427
ENSG00000101160.15	chr20	-	3	0.859873	0.424584	0.619427
ENSG00000239305.7	chr2	-	2	0.639982	0.42495	0.61949
ENSG00000064932.16	chr19	-	3	0.856756	0.4259	0.620401
ENSG00000122550.18	chr7	+	2	0.635145	0.426702	0.620401
ENSG00000125834.13	chr20	+	2	0.634061	0.427096	0.620401
ENSG00000149591.17	chr11	+	2	0.633011	0.427487	0.620401
ENSG00000038382.20	chr5	+	3	0.852997	0.427491	0.620401
ENSG00000166925.9	chr7	-	2	0.632906	0.427517	0.620401
ENSG00000169756.16	chr2	+	3	0.852106	0.42787	0.620443
ENSG00000145990.11	chr6	-	2	0.629673	0.428697	0.621174
ENSG00000076108.12	chr12	-	2	0.628458	0.429142	0.621348
ENSG00000138867.17	chr22	-	2	0.626304	0.429932	0.621943
ENSG00000059691.12	chr4	-	3	0.846631	0.430202	0.621943
ENSG00000145819.18	chr5	+	2	0.623338	0.431024	0.622419
ENSG00000132005.9	chr19	-	2	0.622914	0.431181	0.622419
ENSG00000204580.13	chr6	+	2	0.621004	0.431886	0.622892
ENSG00000173801.17	chr17	-	2	0.62027	0.432158	0.622892
ENSG00000162433.15	chr1	+	3	0.840507	0.432825	0.623385
ENSG00000153094.24	chr2	+	2	0.61462	0.434258	0.62498
ENSG00000188522.15	chr17	-	2	0.61209	0.435212	0.625538
ENSG00000168824.14	chr4	+	2	0.611838	0.435299	0.625538
ENSG00000103316.12	chr16	-	2	0.610547	0.435782	0.625764
ENSG00000071575.11	chr2	+	2	0.608719	0.436468	0.62628
ENSG00000160877.6	chr19	+	2	0.602419	0.438848	0.629223
ENSG00000119333.12	chr9	-	2	0.59519	0.441602	0.632698
ENSG00000078246.17	chr12	+	2	0.591019	0.443203	0.633655
ENSG00000260549.2	chr16	+	2	0.590418	0.443435	0.633655
ENSG00000138835.22	chr9	+	6	0.957635	0.443478	0.633655
ENSG00000137502.10	chr11	-	2	0.588943	0.444003	0.633655
ENSG00000185650.10	chr14	-	2	0.587318	0.444632	0.633655
ENSG00000135631.17	chr2	-	2	0.587051	0.444735	0.633655
ENSG00000140199.13	chr15	-	2	0.587009	0.444751	0.633655
ENSG00000183044.12	chr16	+	2	0.586592	0.444914	0.633655
ENSG00000138964.17	chr22	+	2	0.582716	0.446418	0.635326
ENSG00000151835.16	chr13	-	2	0.577727	0.448367	0.637626
ENSG00000214530.10	chr11	-	2	0.576606	0.448807	0.637778
ENSG00000131089.17	chrX	-	3	0.800508	0.450359	0.638808
ENSG00000168237.18	chr3	+	2	0.572309	0.450499	0.638808
ENSG00000172493.22	chr4	+	3	0.800123	0.450531	0.638808
ENSG00000144596.13	chr3	-	2	0.569415	0.451645	0.639914
ENSG00000197565.16	chrX	-	2	0.557788	0.456292	0.64602
ENSG00000197879.17	chr17	-	3	0.785368	0.457182	0.646451
ENSG00000124772.12	chr6	-	3	0.785003	0.457348	0.646451
ENSG00000133065.11	chr1	-	2	0.554435	0.457646	0.646451
ENSG00000142192.21	chr21	-	2	0.553698	0.457945	0.646451
ENSG00000182326.15	chr12	+	2	0.552788	0.458314	0.646496
ENSG00000131828.14	chrX	+	2	0.551194	0.458962	0.646933
ENSG00000091436.17	chr2	+	3	0.778864	0.460147	0.648128
ENSG00000105711.13	chr19	+	2	0.545984	0.461088	0.648702
ENSG00000050405.13	chr12	-	2	0.544943	0.461515	0.648702
ENSG00000163171.8	chr2	-	2	0.54481	0.46157	0.648702
ENSG00000116584.20	chr1	-	2	0.542839	0.46238	0.648982
ENSG00000104904.12	chr19	+	2	0.541908	0.462763	0.648982
ENSG00000136108.15	chr13	+	2	0.541855	0.462785	0.648982
ENSG00000135956.9	chr2	-	2	0.540678	0.463271	0.649189
ENSG00000048740.18	chr10	+	3	0.761447	0.468174	0.655581
ENSG00000038274.17	chr5	+	2	0.522679	0.470798	0.658774
ENSG00000198695.2	chrM	-	2	0.516428	0.473464	0.662021
ENSG00000136950.13	chr9	+	2	0.513983	0.474506	0.662759
ENSG00000235927.4	chr1	-	2	0.513569	0.474684	0.662759
ENSG00000114993.17	chr2	-	2	0.511791	0.475448	0.662891
ENSG00000172889.16	chr9	+	3	0.745882	0.47547	0.662891
ENSG00000130176.8	chr19	+	3	0.741592	0.477504	0.665244
ENSG00000173960.14	chr2	+	2	0.505482	0.478177	0.665698
ENSG00000141012.13	chr16	-	2	0.502231	0.479593	0.667185
ENSG00000178882.15	chr12	+	2	0.501148	0.480066	0.667359
ENSG00000157540.22	chr21	+	2	0.49796	0.481464	0.668817
ENSG00000069020.18	chr5	+	4	0.822974	0.482025	0.66911
ENSG00000179604.10	chr17	-	2	0.495168	0.482694	0.669555
ENSG00000075420.13	chr3	+	2	0.493945	0.483234	0.66982
ENSG00000141068.14	chr17	+	2	0.492731	0.483772	0.669965
ENSG00000198563.14	chr6	-	2	0.492128	0.484039	0.669965
ENSG00000080493.18	chr4	+	2	0.490224	0.484884	0.670651
ENSG00000196924.19	chrX	-	3	0.723082	0.486365	0.672215
ENSG00000112992.18	chr5	+	2	0.484741	0.487333	0.672743
ENSG00000160271.16	chr9	-	3	0.720839	0.487449	0.672743
ENSG00000133315.12	chr11	-	2	0.480718	0.489142	0.674594
ENSG00000101972.19	chrX	+	2	0.477825	0.49045	0.675912
ENSG00000223969.6	chr7	-	2	0.473122	0.492589	0.677795
ENSG00000136153.20	chr13	+	3	0.709967	0.492745	0.677795
ENSG00000170485.17	chr2	+	2	0.472492	0.492877	0.677795
ENSG00000164849.10	chr7	+	2	0.459284	0.498976	0.68569
ENSG00000135424.18	chr12	-	2	0.457227	0.499938	0.686519
ENSG00000272288.6	chr6	+	2	0.454351	0.501287	0.687879
ENSG00000185129.8	chr5	+	2	0.45263	0.502098	0.688499
ENSG00000115935.18	chr2	-	3	0.687627	0.503808	0.69035
ENSG00000182473.22	chr17	-	2	0.446967	0.50478	0.690488
ENSG00000077684.16	chr4	+	2	0.446661	0.504926	0.690488
ENSG00000198336.9	chr17	+	3	0.68528	0.504989	0.690488
ENSG00000080709.16	chr5	+	2	0.441408	0.507437	0.693341
ENSG00000066136.20	chr1	+	2	0.434112	0.510962	0.69766
ENSG00000183230.17	chr10	-	2	0.4305	0.512723	0.699566
ENSG00000079102.16	chr8	-	2	0.42845	0.513727	0.700438
ENSG00000144935.15	chr3	+	2	0.423381	0.516225	0.703342
ENSG00000143995.20	chr2	+	2	0.41952	0.518142	0.705453
ENSG00000088986.11	chr12	+	2	0.416917	0.519441	0.706719
ENSG00000115657.14	chr2	-	2	0.415749	0.520026	0.707014
ENSG00000100201.23	chr22	-	2	0.412394	0.521712	0.708194
ENSG00000170290.4	chr11	-	2	0.412066	0.521884	0.708194
ENSG00000137573.14	chr8	+	2	0.41182	0.522002	0.708194
ENSG00000123815.13	chr19	-	4	0.749256	0.5235	0.708917
ENSG00000145743.17	chr5	-	2	0.408697	0.523582	0.708917
ENSG00000151914.21	chr6	-	6	0.83728	0.523674	0.708917
ENSG00000048540.15	chr12	-	2	0.407723	0.524077	0.708917
ENSG00000177380.14	chr19	+	2	0.406897	0.524496	0.708917
ENSG00000103852.13	chr15	-	2	0.406391	0.524754	0.708917
ENSG00000177548.13	chr16	-	2	0.401976	0.527012	0.711466
ENSG00000097007.19	chr9	+	2	0.39422	0.53102	0.716201
ENSG00000163697.17	chr4	-	3	0.63425	0.531266	0.716201
ENSG00000167522.16	chr16	-	2	0.39154	0.532418	0.717248
ENSG00000100888.15	chr14	-	2	0.386737	0.534939	0.72014
ENSG00000023734.11	chr12	+	2	0.384792	0.535967	0.720764
ENSG00000104964.15	chr19	-	2	0.384436	0.536155	0.720764
ENSG00000170175.11	chr17	+	3	0.620887	0.538374	0.723237
ENSG00000122644.13	chr7	+	2	0.379559	0.538749	0.723237
ENSG00000187098.17	chr3	+	3	0.619367	0.539189	0.72332
ENSG00000248923.1	chr5	-	2	0.376468	0.540411	0.724453
ENSG00000162512.16	chr1	-	2	0.3709	0.543412	0.727967
ENSG00000010282.15	chr3	-	2	0.368967	0.544463	0.728866
ENSG00000115677.17	chr2	-	5	0.769033	0.545891	0.730268
ENSG00000106025.9	chr7	-	2	0.36469	0.546802	0.730976
ENSG00000161642.18	chr12	-	2	0.362364	0.548085	0.73218
ENSG00000222041.11	chr2	+	2	0.360746	0.548975	0.732859
ENSG00000065802.12	chr2	+	2	0.359571	0.549626	0.733218
ENSG00000168283.14	chr10	+	2	0.358861	0.55002	0.733233
ENSG00000109452.12	chr4	-	2	0.357858	0.550577	0.733465
ENSG00000166272.18	chr10	+	2	0.355415	0.55194	0.73477
ENSG00000110693.18	chr11	-	2	0.351539	0.554113	0.737151
ENSG00000150938.10	chr2	+	2	0.350343	0.554787	0.737536
ENSG00000113594.10	chr5	-	2	0.347217	0.556556	0.739375
ENSG00000109686.19	chr4	-	3	0.585179	0.557841	0.740021
ENSG00000101294.18	chr20	+	2	0.344655	0.558015	0.740021
ENSG00000026025.16	chr10	+	3	0.584532	0.5582	0.740021
ENSG00000204843.13	chr2	-	3	0.582943	0.559083	0.740504
ENSG00000155096.14	chr8	-	2	0.342342	0.559337	0.740504
ENSG00000182022.18	chr10	-	2	0.341334	0.559916	0.740707
ENSG00000068383.19	chr10	+	2	0.340728	0.560263	0.740707
ENSG00000126001.16	chr20	+	2	0.332889	0.564806	0.745169
ENSG00000172530.20	chr16	+	2	0.332428	0.565075	0.745169
ENSG00000142173.16	chr21	+	4	0.679144	0.565391	0.745169
ENSG00000250644.3	chr11	-	2	0.331507	0.565614	0.745169
ENSG00000112837.17	chr6	-	2	0.331209	0.565788	0.745169
ENSG00000068971.14	chr11	+	2	0.330898	0.56597	0.745169
ENSG00000119707.14	chr14	+	2	0.329206	0.566964	0.745965
ENSG00000101276.18	chr20	-	2	0.325726	0.569019	0.748035
ENSG00000242259.9	chr22	-	2	0.324915	0.5695	0.748035
ENSG00000197321.15	chr10	-	3	0.563853	0.569804	0.748035
ENSG00000074266.22	chr11	+	2	0.323781	0.570173	0.748035
ENSG00000186635.15	chr11	-	3	0.562645	0.570489	0.748035
ENSG00000140859.16	chr16	-	2	0.321574	0.57149	0.748835
ENSG00000076944.16	chr19	+	2	0.320702	0.572011	0.748941
ENSG00000148219.18	chr9	-	2	0.32014	0.572352	0.748941
ENSG00000106617.15	chr7	-	4	0.66496	0.574152	0.750784
ENSG00000066629.18	chr14	+	2	0.31554	0.575117	0.751499
ENSG00000104490.18	chr8	-	2	0.313816	0.576162	0.751499
ENSG00000123154.12	chr19	+	3	0.552701	0.576163	0.751499
ENSG00000158158.12	chr2	+	2	0.312519	0.576951	0.751499
ENSG00000160180.16	chr21	-	2	0.310418	0.578233	0.751499
ENSG00000105738.11	chr19	+	2	0.310294	0.578309	0.751499
ENSG00000102547.19	chr13	-	2	0.310274	0.578321	0.751499
ENSG00000023191.17	chr11	-	3	0.548613	0.578512	0.751499
ENSG00000197063.11	chr17	-	2	0.309635	0.578712	0.751499
ENSG00000166402.9	chr11	+	2	0.309431	0.578837	0.751499
ENSG00000027001.10	chr13	-	2	0.309135	0.579019	0.751499
ENSG00000134369.15	chr1	+	2	0.308519	0.579403	0.751499
ENSG00000066697.15	chr9	+	2	0.305345	0.581352	0.753517
ENSG00000008441.18	chr19	+	2	0.301244	0.583899	0.755893
ENSG00000149131.17	chr11	+	2	0.300041	0.58465	0.755893
ENSG00000167641.11	chr19	-	2	0.29996	0.5847	0.755893
ENSG00000151474.23	chr10	-	2	0.299862	0.584762	0.755893
ENSG00000184113.9	chr22	-	2	0.298053	0.585896	0.756848
ENSG00000160691.19	chr1	-	2	0.294487	0.588144	0.759241
ENSG00000153487.13	chr13	+	2	0.293231	0.58894	0.759757
ENSG00000107816.17	chr10	+	2	0.292502	0.589404	0.759843
ENSG00000159128.15	chr21	+	2	0.291516	0.590031	0.76014
ENSG00000169499.15	chr8	+	2	0.287274	0.592746	0.762618
ENSG00000036549.13	chr1	-	2	0.287269	0.59275	0.762618
ENSG00000150991.15	chr12	-	2	0.284513	0.594528	0.764393
ENSG00000205268.11	chr8	-	2	0.282889	0.595581	0.764952
ENSG00000186260.17	chr16	+	3	0.519094	0.595761	0.764952
ENSG00000164050.13	chr3	-	2	0.274671	0.60097	0.771124
ENSG00000164318.18	chr5	+	2	0.273187	0.601953	0.771869
ENSG00000136758.19	chr10	-	2	0.271954	0.602773	0.772193
ENSG00000170153.11	chr4	-	2	0.271459	0.603104	0.772193
ENSG00000196440.11	chrX	+	2	0.270832	0.603522	0.772193
ENSG00000145391.14	chr4	-	2	0.27039	0.603817	0.772193
ENSG00000172380.6	chr1	-	2	0.268708	0.604944	0.773119
ENSG00000106034.18	chr7	+	2	0.265973	0.606786	0.774956
ENSG00000110665.12	chr11	-	2	0.264974	0.607464	0.775305
ENSG00000204681.11	chr6	-	2	0.264135	0.60803	0.775512
ENSG00000182149.21	chr16	+	2	0.261417	0.609881	0.777355
ENSG00000160111.14	chr19	-	2	0.26006	0.610809	0.778021
ENSG00000086015.22	chr1	+	2	0.255923	0.613659	0.780841
ENSG00000115468.12	chr2	+	2	0.255664	0.613838	0.780841
ENSG00000243156.9	chr22	-	2	0.253617	0.615259	0.781755
ENSG00000071655.18	chr19	-	2	0.253456	0.615372	0.781755
ENSG00000149269.10	chr11	-	2	0.252264	0.616203	0.782292
ENSG00000166965.12	chr15	+	2	0.250458	0.617468	0.783379
ENSG00000177119.17	chr12	+	2	0.249713	0.61799	0.783407
ENSG00000060982.15	chr12	-	2	0.249263	0.618307	0.783407
ENSG00000139117.14	chr12	-	2	0.248287	0.618995	0.783521
ENSG00000175274.19	chr11	-	2	0.247976	0.619215	0.783521
ENSG00000152217.20	chr18	+	2	0.247395	0.619625	0.783523
ENSG00000151135.10	chr12	+	2	0.246103	0.62054	0.784055
ENSG00000008256.16	chr7	-	2	0.245647	0.620863	0.784055
ENSG00000148450.13	chr10	+	2	0.243616	0.62231	0.78481
ENSG00000005238.20	chr9	-	2	0.243449	0.62243	0.78481
ENSG00000137074.20	chr9	-	2	0.242707	0.62296	0.78481
ENSG00000188257.12	chr1	-	2	0.24249	0.62312	0.78481
ENSG00000126456.16	chr19	-	2	0.241941	0.623508	0.78481
ENSG00000136068.15	chr3	+	2	0.238798	0.625771	0.786769
ENSG00000162599.17	chr1	+	2	0.238639	0.625886	0.786769
ENSG00000226688.7	chr10	-	2	0.236887	0.627156	0.787849
ENSG00000181722.17	chr3	-	3	0.466636	0.627706	0.787978
ENSG00000170421.12	chr12	-	2	0.235616	0.628081	0.787978
ENSG00000171680.23	chr1	-	2	0.234208	0.629109	0.788752
ENSG00000173638.19	chr21	-	2	0.232929	0.630046	0.78941
ENSG00000137106.18	chr9	+	2	0.231471	0.631119	0.790212
ENSG00000087086.15	chr19	+	2	0.230941	0.63151	0.790212
ENSG00000117595.12	chr1	-	2	0.229876	0.632301	0.790685
ENSG00000188343.13	chr8	+	2	0.228257	0.633497	0.791424
ENSG00000131697.18	chr1	-	2	0.227679	0.633927	0.791424
ENSG00000159267.16	chr21	-	2	0.227407	0.63413	0.791424
ENSG00000154358.23	chr1	+	3	0.454991	0.635029	0.79203
ENSG00000138772.13	chr4	+	2	0.225525	0.635535	0.792146
ENSG00000245060.8	chr5	+	2	0.22461	0.636221	0.792486
ENSG00000075292.19	chr2	+	2	0.222486	0.63782	0.793962
ENSG00000156299.13	chr21	-	2	0.219524	0.640065	0.79624
ENSG00000120885.22	chr8	-	2	0.218441	0.640892	0.79675
ENSG00000115194.11	chr2	-	2	0.216575	0.64232	0.797584
ENSG00000143554.14	chr1	+	2	0.215318	0.643286	0.797584
ENSG00000171700.14	chr20	-	2	0.214926	0.643588	0.797584
ENSG00000172613.8	chr11	+	2	0.214674	0.643783	0.797584
ENSG00000137764.20	chr15	+	2	0.214321	0.644058	0.797584
ENSG00000010278.15	chr12	+	2	0.213837	0.644429	0.797584
ENSG00000105647.19	chr19	+	3	0.440168	0.644474	0.797584
ENSG00000131149.19	chr16	+	2	0.211981	0.645869	0.798794
ENSG00000022840.16	chr12	+	3	0.435585	0.647423	0.800005
ENSG00000102317.18	chrX	+	2	0.209656	0.647683	0.800005
ENSG00000081377.17	chr9	-	2	0.208623	0.648492	0.800489
ENSG00000102678.7	chr13	+	2	0.207178	0.64963	0.801377
ENSG00000179818.14	chr2	-	2	0.20524	0.651162	0.802751
ENSG00000075914.13	chr3	+	2	0.203229	0.652761	0.803934
ENSG00000182871.16	chr21	+	2	0.20282	0.653087	0.803934
ENSG00000175029.17	chr10	-	2	0.201213	0.654374	0.803934
ENSG00000041982.16	chr9	-	2	0.20111	0.654462	0.803934
ENSG00000233237.8	chr6	-	2	0.20082	0.65469	0.803934
ENSG00000148411.8	chr9	-	2	0.199968	0.655375	0.803934
ENSG00000072778.20	chr17	+	4	0.539452	0.655609	0.803934
ENSG00000172572.7	chr12	+	2	0.198882	0.656251	0.803934
ENSG00000159403.18	chr12	-	2	0.198686	0.65641	0.803934
ENSG00000092098.17	chr14	+	2	0.198309	0.656715	0.803934
ENSG00000166292.12	chr17	-	2	0.197952	0.657004	0.803934
ENSG00000196562.14	chr20	-	2	0.197766	0.657155	0.803934
ENSG00000166508.18	chr7	-	2	0.196257	0.658381	0.804922
ENSG00000184601.11	chr14	+	2	0.195563	0.658947	0.8051
ENSG00000137501.17	chr11	-	2	0.194667	0.65968	0.805481
ENSG00000119917.15	chr10	+	2	0.19298	0.661068	0.806663
ENSG00000267082.1	chr19	+	2	0.1919	0.661954	0.806718
ENSG00000168071.22	chr11	+	2	0.191899	0.661955	0.806718
ENSG00000112541.18	chr6	-	4	0.528376	0.663115	0.807619
ENSG00000147140.17	chrX	+	2	0.189253	0.664148	0.808167
ENSG00000223695.1	chr22	+	2	0.188934	0.664414	0.808167
ENSG00000012232.9	chr8	+	2	0.188002	0.665192	0.808167
ENSG00000188549.12	chr15	-	2	0.18757	0.665553	0.808167
ENSG00000130695.16	chr1	+	2	0.186941	0.66608	0.808167
ENSG00000011454.18	chr9	+	2	0.18683	0.666173	0.808167
ENSG00000136261.15	chr7	+	2	0.186422	0.666516	0.808167
ENSG00000172262.11	chr5	+	3	0.402688	0.668995	0.81066
ENSG00000230590.11	chrX	-	2	0.182951	0.669447	0.810695
ENSG00000157873.18	chr1	+	2	0.181162	0.670971	0.812027
ENSG00000089693.11	chr12	-	4	0.51377	0.673086	0.814073
ENSG00000187091.14	chr3	-	2	0.176294	0.675163	0.815997
ENSG00000160753.16	chr1	+	2	0.175637	0.675734	0.815997
ENSG00000198393.8	chr12	+	2	0.175385	0.675953	0.815997
ENSG00000087095.13	chr17	+	2	0.172039	0.678883	0.81838
ENSG00000164116.17	chr4	+	2	0.170935	0.679858	0.81838
ENSG00000136160.17	chr13	-	2	0.170855	0.679928	0.81838
ENSG00000065054.14	chr16	+	3	0.386079	0.68016	0.81838
ENSG00000118046.16	chr19	+	2	0.169394	0.681224	0.81838
ENSG00000004059.11	chr7	+	2	0.16939	0.681227	0.81838
ENSG00000006194.10	chr16	+	2	0.169113	0.681473	0.81838
ENSG00000159131.17	chr21	-	2	0.168974	0.681597	0.81838
ENSG00000167815.12	chr19	-	2	0.16878	0.68177	0.81838
ENSG00000275915.1	chr1	+	2	0.166414	0.683886	0.820406
ENSG00000182979.18	chr14	+	3	0.379235	0.684816	0.820706
ENSG00000240771.8	chr12	+	2	0.165184	0.684992	0.820706
ENSG00000168016.15	chr3	-	2	0.16369	0.686343	0.821606
ENSG00000151276.23	chr3	-	2	0.163406	0.686601	0.821606
ENSG00000131018.24	chr6	-	4	0.493271	0.687209	0.821822
ENSG00000121964.14	chr2	-	2	0.161595	0.68825	0.822101
ENSG00000168395.16	chr2	+	2	0.16154	0.6883	0.822101
ENSG00000174851.16	chr11	-	2	0.160994	0.688801	0.822187
ENSG00000100196.11	chr22	+	2	0.15932	0.690336	0.823507
ENSG00000102265.12	chrX	+	3	0.370095	0.691083	0.823884
ENSG00000087266.17	chr4	+	2	0.15713	0.692361	0.824396
ENSG00000101639.18	chr18	+	2	0.157119	0.692372	0.824396
ENSG00000125818.18	chr20	+	2	0.156259	0.693172	0.824836
ENSG00000107262.26	chr9	-	2	0.154562	0.694757	0.82621
ENSG00000081923.15	chr18	-	2	0.153348	0.695898	0.827053
ENSG00000130558.20	chr9	+	2	0.152537	0.696662	0.827449
ENSG00000188554.15	chr17	+	2	0.151083	0.69804	0.828571
ENSG00000118689.15	chr6	+	2	0.149697	0.69936	0.829564
ENSG00000148053.17	chr9	+	2	0.149298	0.699742	0.829564
ENSG00000163605.15	chr3	+	3	0.356544	0.700481	0.829927
ENSG00000111913.20	chr6	-	2	0.146561	0.702372	0.831574
ENSG00000114480.13	chr3	-	2	0.146183	0.702739	0.831574
ENSG00000143321.19	chr1	-	3	0.349161	0.705656	0.834512
ENSG00000187498.16	chr13	-	2	0.142537	0.706292	0.834748
ENSG00000183963.19	chr22	+	2	0.140928	0.707876	0.836105
ENSG00000187535.14	chr16	-	2	0.140123	0.708674	0.836532
ENSG00000143632.14	chr1	-	2	0.139671	0.709126	0.836551
ENSG00000133027.18	chr17	-	2	0.13827	0.710519	0.837118
ENSG00000150995.20	chr3	+	2	0.138078	0.71071	0.837118
ENSG00000051620.11	chr6	+	2	0.137871	0.710917	0.837118
ENSG00000085563.15	chr7	-	2	0.136316	0.712479	0.8384
ENSG00000244687.12	chr20	-	2	0.135917	0.71288	0.8384
ENSG00000055609.20	chr7	-	2	0.135341	0.713463	0.83857
ENSG00000168556.7	chr4	+	2	0.134794	0.714016	0.838706
ENSG00000132463.14	chr4	-	2	0.13306	0.715781	0.840265
ENSG00000182809.11	chr14	+	3	0.332281	0.717633	0.841923
ENSG00000109670.16	chr4	-	3	0.330324	0.719034	0.843051
ENSG00000171853.16	chr2	+	3	0.329046	0.719951	0.843194
ENSG00000115904.14	chr2	-	2	0.128931	0.720035	0.843194
ENSG00000123636.18	chr2	-	2	0.128109	0.720891	0.843473
ENSG00000105974.13	chr7	+	2	0.127857	0.721154	0.843473
ENSG00000142871.18	chr1	+	2	0.126331	0.722757	0.844832
ENSG00000242125.3	chr1	+	2	0.124593	0.724588	0.846457
ENSG00000269113.4	chr1	-	2	0.123427	0.725829	0.846649
ENSG00000177169.10	chr12	+	2	0.122871	0.726421	0.846649
ENSG00000128591.16	chr7	+	2	0.122747	0.726556	0.846649
ENSG00000162909.18	chr1	+	2	0.122433	0.726888	0.846649
ENSG00000154262.13	chr17	-	2	0.12181	0.727557	0.846649
ENSG00000262879.6	chr17	-	2	0.121697	0.727677	0.846649
ENSG00000172845.17	chr2	-	3	0.318081	0.727866	0.846649
ENSG00000109099.16	chr17	-	4	0.434685	0.728326	0.846649
ENSG00000105426.17	chr19	-	4	0.433633	0.729073	0.846649
ENSG00000149187.18	chr11	-	2	0.120018	0.729488	0.846649
ENSG00000074964.17	chr1	+	2	0.119904	0.729611	0.846649
ENSG00000136925.15	chr9	-	2	0.118369	0.731279	0.84767
ENSG00000166313.19	chr11	-	2	0.118282	0.731375	0.84767
ENSG00000154978.13	chr7	-	2	0.116702	0.733105	0.849161
ENSG00000070831.17	chr1	+	2	0.115613	0.734306	0.849729
ENSG00000114541.15	chr3	-	5	0.501742	0.734481	0.849729
ENSG00000164830.19	chr8	+	3	0.307097	0.735883	0.850837
ENSG00000152082.15	chr2	+	2	0.112653	0.737601	0.852309
ENSG00000049618.24	chr6	+	2	0.111962	0.738377	0.852692
ENSG00000177311.11	chr3	+	2	0.111211	0.739223	0.853155
ENSG00000186020.13	chr19	-	2	0.110777	0.739714	0.853208
ENSG00000049323.16	chr2	+	2	0.109544	0.741114	0.854211
ENSG00000172354.10	chr7	+	2	0.109227	0.741475	0.854211
ENSG00000171914.16	chr15	+	2	0.107733	0.743186	0.855668
ENSG00000142156.15	chr21	+	2	0.107093	0.743923	0.856002
ENSG00000131386.19	chr3	+	2	0.10548	0.74579	0.85696
ENSG00000164591.14	chr5	+	2	0.10505	0.746291	0.85696
ENSG00000180035.13	chr16	+	2	0.104926	0.746436	0.85696
ENSG00000133678.14	chr10	+	2	0.104537	0.74689	0.85696
ENSG00000127824.14	chr2	-	2	0.104451	0.74699	0.85696
ENSG00000141298.19	chr17	-	2	0.102078	0.749783	0.859286
ENSG00000160216.21	chr21	+	3	0.288161	0.749914	0.859286
ENSG00000092929.12	chr17	-	2	0.0988607	0.753628	0.863026
ENSG00000196923.14	chr5	-	2	0.0978371	0.754864	0.863551
ENSG00000152413.15	chr5	-	2	0.0977355	0.754987	0.863551
ENSG00000166483.12	chr11	+	2	0.096925	0.755973	0.864162
ENSG00000171033.13	chr8	+	2	0.0959136	0.757212	0.865062
ENSG00000113448.19	chr5	-	2	0.0943569	0.759125	0.866347
ENSG00000166398.14	chr19	+	2	0.0940124	0.759551	0.866347
ENSG00000135905.20	chr2	-	2	0.0938987	0.759692	0.866347
ENSG00000145012.13	chr3	+	3	0.272932	0.761393	0.866689
ENSG00000088682.14	chr16	+	2	0.0923497	0.761621	0.866689
ENSG00000173406.16	chr1	-	2	0.0923402	0.761633	0.866689
ENSG00000149823.9	chr11	+	2	0.0922071	0.7618	0.866689
ENSG00000163694.15	chr4	-	2	0.0905541	0.76388	0.86854
ENSG00000173928.4	chr19	+	2	0.0898931	0.764718	0.868716
ENSG00000147573.17	chr8	+	2	0.0895817	0.765113	0.868716
ENSG00000102575.13	chr19	-	2	0.0893607	0.765395	0.868716
ENSG00000122378.14	chr10	+	2	0.0882455	0.76682	0.869819
ENSG00000153048.11	chr16	-	2	0.0858774	0.76988	0.872773
ENSG00000198844.12	chr17	+	2	0.084567	0.771593	0.874198
ENSG00000166068.13	chr15	+	2	0.0836319	0.772824	0.874764
ENSG00000111846.19	chr6	+	3	0.257761	0.773005	0.874764
ENSG00000251247.11	chr19	+	2	0.083012	0.773644	0.874971
ENSG00000010803.16	chr1	-	2	0.0812959	0.775932	0.877041
ENSG00000104635.15	chr8	+	2	0.0807822	0.776622	0.877304
ENSG00000124225.16	chr20	-	2	0.0796476	0.778155	0.878517
ENSG00000108823.16	chr17	+	2	0.0788835	0.779193	0.879172
ENSG00000141867.19	chr19	-	2	0.0767532	0.782118	0.881953
ENSG00000106608.17	chr7	-	2	0.0758278	0.783402	0.882882
ENSG00000141562.18	chr17	+	2	0.074896	0.784704	0.883829
ENSG00000141447.18	chr18	-	2	0.0739096	0.786091	0.884872
ENSG00000130299.17	chr19	+	2	0.0720064	0.788797	0.886824
ENSG00000077009.13	chr19	+	3	0.237056	0.789142	0.886824
ENSG00000134897.14	chr13	+	2	0.0715495	0.789452	0.886824
ENSG00000144118.14	chr2	+	2	0.0713935	0.789676	0.886824
ENSG00000120729.10	chr5	+	2	0.0702824	0.791283	0.887953
ENSG00000122417.15	chr1	-	2	0.0700571	0.791608	0.887953
ENSG00000134769.22	chr18	+	3	0.233304	0.792102	0.887988
ENSG00000133121.21	chr13	-	3	0.231434	0.793581	0.888532
ENSG00000108306.13	chr17	-	2	0.0686871	0.793608	0.888532
ENSG00000168273.8	chr3	+	2	0.0684358	0.793978	0.888532
ENSG00000015153.15	chr12	-	2	0.0679652	0.794671	0.888789
ENSG00000170638.10	chr22	+	2	0.0674236	0.795473	0.888943
ENSG00000184220.12	chr3	+	2	0.0671261	0.795914	0.888943
ENSG00000181409.14	chr17	-	2	0.06671	0.796534	0.888943
ENSG00000204138.13	chr1	+	2	0.066623	0.796663	0.888943
ENSG00000051523.11	chr16	-	2	0.0662971	0.79715	0.888969
ENSG00000115998.8	chr2	-	2	0.0651249	0.798912	0.890416
ENSG00000101997.13	chrX	+	2	0.06196	0.803756	0.89529
ENSG00000224318.6	chr3	-	2	0.0615172	0.804445	0.89529
ENSG00000161958.11	chr17	+	3	0.21751	0.804687	0.89529
ENSG00000078304.19	chr14	+	3	0.21491	0.806778	0.897095
ENSG00000107968.10	chr10	+	2	0.0595221	0.807578	0.897465
ENSG00000158092.7	chr3	+	2	0.0587481	0.808808	0.898311
ENSG00000176209.12	chr8	+	2	0.0570945	0.811466	0.900742
ENSG00000161011.20	chr5	+	3	0.202015	0.817229	0.906613
ENSG00000164093.17	chr4	-	2	0.0518963	0.8201	0.908933
ENSG00000175866.15	chr17	+	2	0.0517965	0.820268	0.908933
ENSG00000105699.17	chr19	+	2	0.0512771	0.821156	0.909391
ENSG00000196504.19	chr2	-	2	0.0507799	0.822011	0.909532
ENSG00000110446.12	chr11	-	2	0.0506516	0.822232	0.909532
ENSG00000135778.12	chr1	+	2	0.0500133	0.823337	0.909943
ENSG00000159069.14	chr9	-	2	0.049889	0.823553	0.909943
ENSG00000106348.18	chr7	-	2	0.0486207	0.825773	0.91187
ENSG00000069667.16	chr15	-	2	0.047969	0.826926	0.912618
ENSG00000104976.12	chr19	+	2	0.0467129	0.829171	0.914569
ENSG00000168003.18	chr11	+	2	0.0463208	0.829879	0.914823
ENSG00000105855.10	chr7	+	2	0.0455504	0.831278	0.915781
ENSG00000126777.18	chr14	+	3	0.184429	0.831703	0.915781
ENSG00000105810.10	chr7	-	2	0.0445845	0.833049	0.916737
ENSG00000127870.17	chr13	-	2	0.0439899	0.83415	0.917268
ENSG00000197971.16	chr18	-	3	0.181079	0.834489	0.917268
ENSG00000108679.13	chr17	-	2	0.0429379	0.836116	0.918225
ENSG00000163539.17	chr3	-	3	0.17881	0.836382	0.918225
ENSG00000143740.15	chr1	+	3	0.17823	0.836866	0.918225
ENSG00000017427.17	chr12	-	2	0.0423248	0.837275	0.918225
ENSG00000204634.13	chr2	-	2	0.0419899	0.83791	0.918395
ENSG00000105993.15	chr7	+	2	0.0411599	0.839497	0.919609
ENSG00000175538.11	chr11	-	2	0.0403923	0.840981	0.920417
ENSG00000177963.14	chr11	+	2	0.0402819	0.841195	0.920417
ENSG00000103034.14	chr16	+	4	0.275323	0.843189	0.921952
ENSG00000157216.16	chr1	-	2	0.0388668	0.843973	0.921952
ENSG00000128641.19	chr2	+	2	0.0386327	0.844437	0.921952
ENSG00000154309.9	chr1	+	2	0.0385905	0.844521	0.921952
ENSG00000151967.18	chr3	+	2	0.0382826	0.845135	0.922096
ENSG00000100628.12	chr14	-	2	0.0368867	0.847949	0.924641
ENSG00000070404.10	chr19	+	2	0.0362853	0.849179	0.925051
ENSG00000115159.16	chr2	+	2	0.0362306	0.849291	0.925051
ENSG00000067057.18	chr10	+	4	0.266054	0.849843	0.925127
ENSG00000173120.15	chr11	+	2	0.0355123	0.850774	0.925592
ENSG00000057657.17	chr6	+	2	0.0352907	0.851235	0.925592
ENSG00000118137.10	chr11	-	2	0.0337331	0.854519	0.928636
ENSG00000153113.24	chr5	+	5	0.33215	0.856303	0.929405
ENSG00000133069.17	chr1	+	3	0.154488	0.856943	0.929405
ENSG00000219607.4	chr6	+	2	0.0324418	0.857298	0.929405
ENSG00000105514.8	chr19	-	2	0.0323372	0.857526	0.929405
ENSG00000053918.18	chr11	+	2	0.0322796	0.857652	0.929405
ENSG00000100605.17	chr14	-	2	0.0311117	0.860223	0.9316
ENSG00000136986.10	chr8	-	2	0.0309214	0.860648	0.9316
ENSG00000130294.18	chr2	-	2	0.0298435	0.863074	0.933698
ENSG00000267577.1	chr19	+	2	0.0289744	0.865062	0.934854
ENSG00000083312.18	chr5	+	2	0.0289502	0.865118	0.934854
ENSG00000139160.13	chr12	+	2	0.0285509	0.866042	0.935325
ENSG00000154153.14	chr5	-	2	0.0268705	0.870009	0.937895
ENSG00000187773.9	chr18	-	2	0.0265467	0.870787	0.937895
ENSG00000186352.9	chr4	+	2	0.0264672	0.870978	0.937895
ENSG00000228794.10	chr1	+	2	0.0261447	0.87176	0.937895
ENSG00000125107.19	chr16	-	2	0.0261056	0.871854	0.937895
ENSG00000094916.16	chr12	-	2	0.0257621	0.872693	0.937895
ENSG00000105438.9	chr19	-	2	0.0255965	0.8731	0.937895
ENSG00000141540.11	chr17	+	2	0.0255819	0.873135	0.937895
ENSG00000176834.14	chr12	-	2	0.0254551	0.873447	0.937895
ENSG00000172009.15	chr19	+	2	0.0253156	0.873792	0.937895
ENSG00000106069.23	chr7	+	2	0.0252338	0.873994	0.937895
ENSG00000159314.11	chr17	-	3	0.134393	0.874315	0.937895
ENSG00000154305.18	chr1	+	2	0.0247935	0.875089	0.937895
ENSG00000088808.18	chr14	-	2	0.0247209	0.875271	0.937895
ENSG00000183098.11	chr13	+	2	0.024472	0.875896	0.93804
ENSG00000109171.15	chr4	+	2	0.0237778	0.877654	0.939398
ENSG00000198053.12	chr20	+	2	0.0235245	0.878302	0.939567
ENSG00000146147.15	chr6	+	2	0.0229474	0.879792	0.94035
ENSG00000134138.20	chr15	-	4	0.223273	0.880194	0.94035
ENSG00000130940.15	chr1	-	2	0.0226739	0.880505	0.94035
ENSG00000157985.19	chr2	+	2	0.0223518	0.881351	0.940623
ENSG00000119139.21	chr9	+	3	0.125632	0.882	0.940623
ENSG00000185825.17	chrX	-	2	0.022014	0.882244	0.940623
ENSG00000225733.6	chr3	-	2	0.021834	0.882723	0.940623
ENSG00000176490.5	chr19	-	2	0.0214694	0.883699	0.94114
ENSG00000095787.24	chr10	+	2	0.0210356	0.884872	0.941865
ENSG00000004478.8	chr12	+	2	0.0205303	0.886253	0.942439
ENSG00000138640.15	chr4	-	2	0.0203882	0.886645	0.942439
ENSG00000075785.14	chr3	+	3	0.119947	0.887023	0.942439
ENSG00000109501.14	chr4	+	2	0.0201239	0.887377	0.942439
ENSG00000132640.15	chr20	+	2	0.0198012	0.888278	0.942705
ENSG00000167081.18	chr9	+	2	0.0196823	0.888611	0.942705
ENSG00000196628.20	chr18	-	6	0.33781	0.889969	0.942933
ENSG00000101019.22	chr20	-	2	0.0191337	0.890165	0.942933
ENSG00000138606.19	chr15	-	2	0.0190556	0.890388	0.942933
ENSG00000110237.5	chr11	+	2	0.0189138	0.890794	0.942933
ENSG00000118971.9	chr12	+	2	0.0184569	0.892113	0.943808
ENSG00000164953.16	chr8	+	2	0.0173994	0.89523	0.946584
ENSG00000113575.10	chr5	-	2	0.0167143	0.897302	0.948251
ENSG00000164054.15	chr3	-	2	0.0164647	0.898067	0.948476
ENSG00000121057.13	chr17	+	2	0.0163232	0.898504	0.948476
ENSG00000121316.11	chr12	-	2	0.0160397	0.899384	0.948883
ENSG00000130429.15	chr7	+	2	0.0149781	0.902754	0.951686
ENSG00000172159.16	chr9	-	2	0.0148629	0.903127	0.951686
ENSG00000054654.19	chr14	+	4	0.189473	0.903531	0.951686
ENSG00000106565.18	chr7	-	2	0.013997	0.905977	0.953196
ENSG00000196507.11	chrX	+	2	0.0139194	0.906237	0.953196
ENSG00000017260.20	chr3	+	2	0.013854	0.906456	0.953196
ENSG00000223865.11	chr6	+	2	0.0133568	0.908143	0.954446
ENSG00000057294.15	chr12	-	2	0.0129316	0.909611	0.955465
ENSG00000182175.14	chr15	-	2	0.0126607	0.910558	0.955936
ENSG00000089159.17	chr12	-	2	0.0118253	0.913547	0.95855
ENSG00000119383.21	chr9	+	3	0.0881312	0.915672	0.959472
ENSG00000196526.10	chr4	-	2	0.0112467	0.91568	0.959472
ENSG00000245532.9	chr11	+	2	0.0110538	0.916405	0.959472
ENSG00000198431.16	chr12	+	4	0.170256	0.916428	0.959472
ENSG00000053254.16	chr14	-	3	0.0850031	0.918539	0.961018
ENSG00000150593.18	chr10	+	2	0.0101248	0.919981	0.961018
ENSG00000133878.9	chr8	-	2	0.0100895	0.92012	0.961018
ENSG00000204954.10	chr12	-	2	0.00996687	0.920606	0.961018
ENSG00000116171.19	chr1	+	2	0.00970126	0.921667	0.961018
ENSG00000277258.5	chr17	-	2	0.00968009	0.921753	0.961018
ENSG00000181830.9	chr11	+	2	0.00950179	0.922474	0.961018
ENSG00000017797.13	chr18	+	2	0.00947212	0.922595	0.961018
ENSG00000138185.20	chr10	+	2	0.00939412	0.922913	0.961018
ENSG00000105483.18	chr19	-	2	0.00939287	0.922918	0.961018
ENSG00000153310.19	chr8	-	2	0.00909258	0.924157	0.961785
ENSG00000138193.16	chr10	+	2	0.00811158	0.928353	0.964676
ENSG00000100599.16	chr14	+	2	0.0081086	0.928366	0.964676
ENSG00000129009.13	chr15	+	2	0.00809101	0.928444	0.964676
ENSG00000182957.16	chr13	+	2	0.00766963	0.930327	0.965607
ENSG00000135185.12	chr7	-	2	0.00763956	0.930464	0.965607
ENSG00000250722.6	chr5	-	2	0.00755436	0.930851	0.965607
ENSG00000064042.18	chr4	+	3	0.0671591	0.935065	0.968911
ENSG00000105409.19	chr19	-	2	0.00656336	0.935536	0.968911
ENSG00000170439.7	chr12	+	2	0.00656008	0.935552	0.968911
ENSG00000189337.17	chr1	+	2	0.00642451	0.93622	0.969078
ENSG00000215386.13	chr21	+	3	0.0644307	0.937618	0.969152
ENSG00000100234.12	chr22	+	2	0.00595182	0.938606	0.969152
ENSG00000170558.10	chr18	-	2	0.00584837	0.939141	0.969152
ENSG00000189308.11	chr4	-	2	0.00583705	0.9392	0.969152
ENSG00000172346.15	chr22	+	2	0.00579903	0.939398	0.969152
ENSG00000106992.19	chr9	-	2	0.00574147	0.939698	0.969152
ENSG00000084093.19	chr4	+	2	0.00571655	0.939829	0.969152
ENSG00000165806.21	chr10	+	2	0.00486687	0.944473	0.973004
ENSG00000198420.10	chr7	-	2	0.00484801	0.94458	0.973004
ENSG00000173264.15	chr11	+	2	0.00438538	0.947287	0.974464
ENSG00000168000.15	chr11	-	2	0.00430048	0.947799	0.974464
ENSG00000158793.14	chr1	+	2	0.00425103	0.948099	0.974464
ENSG00000197714.9	chr19	+	2	0.00417798	0.948547	0.974464
ENSG00000132676.16	chr1	+	2	0.00412164	0.948894	0.974464
ENSG00000127084.19	chr9	+	2	0.0040841	0.949127	0.974464
ENSG00000166484.20	chr17	+	2	0.00401543	0.949556	0.974464
ENSG00000173171.15	chr1	+	2	0.00388792	0.950362	0.97477
ENSG00000170776.22	chr15	+	4	0.112516	0.952747	0.976693
ENSG00000189171.14	chr1	-	2	0.00326699	0.954494	0.977752
ENSG00000120742.11	chr3	-	2	0.00318447	0.955072	0.977752
ENSG00000182963.11	chr17	-	2	0.00315071	0.95531	0.977752
ENSG00000145431.11	chr4	-	2	0.00303868	0.956111	0.978049
ENSG00000159720.12	chr16	-	2	0.00284139	0.957558	0.979008
ENSG00000150630.4	chr4	-	2	0.00269492	0.958666	0.979531
ENSG00000082293.13	chr6	+	2	0.00263952	0.959092	0.979531
ENSG00000172765.17	chr3	-	2	0.00247003	0.960426	0.979916
ENSG00000163520.14	chr3	+	2	0.0024619	0.960492	0.979916
ENSG00000165410.15	chr14	-	2	0.00182433	0.965987	0.983302
ENSG00000197530.12	chr1	+	2	0.00180062	0.966208	0.983302
ENSG00000172992.12	chr17	-	2	0.00169936	0.967171	0.983302
ENSG00000196605.7	chr19	-	2	0.00169821	0.967182	0.983302
ENSG00000163820.15	chr3	-	2	0.00168945	0.967267	0.983302
ENSG00000175449.14	chr5	+	2	0.0016841	0.967319	0.983302
ENSG00000115649.16	chr2	-	2	0.00167561	0.967401	0.983302
ENSG00000092820.18	chr6	-	2	0.00159202	0.968224	0.983617
ENSG00000213722.10	chr6	-	2	0.00147768	0.969386	0.984276
ENSG00000114544.17	chr3	-	2	0.00122959	0.972073	0.985198
ENSG00000197905.10	chr12	+	2	0.00117817	0.972663	0.985198
ENSG00000089876.12	chr10	-	2	0.00117771	0.972668	0.985198
ENSG00000108953.17	chr17	-	2	0.00111443	0.973412	0.985198
ENSG00000108312.15	chr17	-	2	0.0010657	0.974	0.985198
ENSG00000105576.15	chr19	-	3	0.0262882	0.974057	0.985198
ENSG00000163798.13	chr2	+	2	0.00103282	0.974404	0.985198
ENSG00000198589.14	chr4	-	2	0.00101439	0.974633	0.985198
ENSG00000116044.16	chr2	-	2	0.000991631	0.974919	0.985198
ENSG00000166025.18	chr11	+	2	0.000935358	0.975641	0.985408
ENSG00000005882.12	chr17	+	2	0.000771145	0.977882	0.986646
ENSG00000138411.13	chr2	-	2	0.00077013	0.977897	0.986646
ENSG00000145016.16	chr3	-	2	0.000655619	0.979606	0.987453
ENSG00000008513.16	chr8	-	2	0.000647878	0.979726	0.987453
ENSG00000120896.13	chr8	+	3	0.0183109	0.981857	0.98908
ENSG00000147130.14	chrX	-	2	0.000415284	0.983768	0.989412
ENSG00000156381.9	chr14	-	2	0.000387259	0.984325	0.989412
ENSG00000114738.11	chr3	+	2	0.000354426	0.985004	0.989412
ENSG00000102781.14	chr13	-	2	0.000343194	0.985244	0.989412
ENSG00000198218.11	chr3	-	2	0.00033041	0.985521	0.989412
ENSG00000115290.10	chr2	-	2	0.000323347	0.985677	0.989412
ENSG00000176170.14	chr17	+	2	0.000317837	0.985799	0.989412
ENSG00000115902.11	chr2	+	2	0.000179775	0.98932	0.992426
ENSG00000247596.10	chr3	-	2	0.000140637	0.990554	0.992783
ENSG00000113657.13	chr5	-	2	0.000128502	0.99097	0.992783
ENSG00000163660.12	chr3	-	2	0.000121232	0.991229	0.992783
ENSG00000109332.20	chr4	-	3	0.00773049	0.9923	0.993336
ENSG00000144331.20	chr2	-	3	0.00669401	0.993329	0.993847
ENSG00000088992.18	chr12	-	2	2.90436e-05	0.995707	0.995707

## Sheet: CAGE.DPU.Healthy.Atrium
geneId	cluster_chr	cluster_strand	NExons	gene.F	P.Value	FDR
ENSG00000129824.16	chrY	+	2	1013.77	1.37685e-49	2.63116e-46
ENSG00000155657.28	chr2	-	6	14.9134	8.67722e-13	8.29108e-10
ENSG00000112096.19	chr6	-	3	26.246	3.03592e-10	1.93388e-07
ENSG00000170525.21	chr10	+	3	25.7297	4.37206e-10	2.04396e-07
ENSG00000152061.23	chr1	+	3	25.39	5.34787e-10	2.04396e-07
ENSG00000140416.23	chr15	+	7	8.92169	6.21524e-09	1.97955e-06
ENSG00000168309.18	chr3	-	3	21.029	1.30245e-08	3.5557e-06
ENSG00000132510.11	chr17	+	3	19.2972	4.96371e-08	1.18571e-05
ENSG00000132002.9	chr19	-	2	34.3016	8.64814e-08	1.83629e-05
ENSG00000184489.13	chr8	+	4	12.209	2.91409e-07	5.56883e-05
ENSG00000135077.9	chr5	-	3	16.026	6.24812e-07	0.000108547
ENSG00000102316.17	chrX	+	3	15.4334	1.00441e-06	0.000159928
ENSG00000133313.15	chr18	+	2	27.523	1.08795e-06	0.000159928
ENSG00000105373.19	chr19	+	3	14.8761	1.57465e-06	0.00021494
ENSG00000107798.18	chr10	-	2	26.0828	1.92313e-06	0.000242272
ENSG00000126883.17	chr9	+	2	25.9467	2.02844e-06	0.000242272
ENSG00000173113.7	chr11	-	2	25.6248	2.30644e-06	0.000259271
ENSG00000145730.20	chr5	+	6	7.21002	2.55202e-06	0.000270939
ENSG00000184060.11	chr17	+	2	24.8821	3.107e-06	0.000312498
ENSG00000184007.22	chr1	-	3	13.5777	4.54797e-06	0.000395444
ENSG00000174437.17	chr12	+	7	6.13591	4.55824e-06	0.000395444
ENSG00000156256.15	chr21	+	2	23.9568	4.62505e-06	0.000395444
ENSG00000101210.13	chr20	-	3	13.5225	4.7594e-06	0.000395444
ENSG00000164107.9	chr4	-	3	13.4488	5.05538e-06	0.000402535
ENSG00000137497.18	chr11	-	4	9.62433	6.78503e-06	0.000518648
ENSG00000163681.16	chr3	+	4	9.36044	9.41012e-06	0.000691644
ENSG00000036448.10	chr8	+	3	12.5879	1.03289e-05	0.000720714
ENSG00000156467.10	chr8	-	3	12.5423	1.07288e-05	0.000720714
ENSG00000162241.12	chr11	-	2	21.7643	1.11332e-05	0.000720714
ENSG00000149925.22	chr16	+	4	9.20406	1.14313e-05	0.000720714
ENSG00000172348.15	chr6	-	2	21.6469	1.16913e-05	0.000720714
ENSG00000162616.9	chr1	+	2	21.4549	1.26664e-05	0.000756421
ENSG00000112137.18	chr6	+	3	12.1777	1.45561e-05	0.000837584
ENSG00000154556.18	chr4	-	7	5.63964	1.49021e-05	0.000837584
ENSG00000115310.18	chr2	-	3	12.0427	1.62969e-05	0.00088981
ENSG00000135900.4	chr2	+	2	20.6024	1.84486e-05	0.00096029
ENSG00000111716.14	chr12	-	3	11.8864	1.85927e-05	0.00096029
ENSG00000151067.22	chr12	+	2	20.4397	1.9413e-05	0.000976272
ENSG00000159200.18	chr21	-	2	20.2834	2.11001e-05	0.0010339
ENSG00000185022.12	chr22	+	2	19.9696	2.40912e-05	0.00115096
ENSG00000100906.11	chr14	-	2	19.8958	2.47997e-05	0.00115591
ENSG00000115053.17	chr2	-	3	11.4429	2.70374e-05	0.0012302
ENSG00000078114.19	chr10	-	7	5.29786	3.36815e-05	0.00149687
ENSG00000111912.20	chr6	+	4	8.3061	3.51281e-05	0.00152568
ENSG00000109390.13	chr4	-	3	10.9836	3.99272e-05	0.00169557
ENSG00000213853.10	chr16	-	2	18.0955	5.29314e-05	0.00219896
ENSG00000106333.13	chr7	+	3	10.6169	5.46174e-05	0.00222072
ENSG00000107796.13	chr10	-	2	17.8651	5.85071e-05	0.00232932
ENSG00000131446.17	chr5	-	4	7.78971	6.73334e-05	0.00258497
ENSG00000108691.9	chr17	+	2	17.5164	6.90761e-05	0.00258497
ENSG00000119139.21	chr9	+	3	10.293	7.21185e-05	0.00258497
ENSG00000050165.18	chr11	-	3	10.2825	7.27979e-05	0.00258497
ENSG00000173598.14	chr12	+	2	17.3573	7.30283e-05	0.00258497
ENSG00000228474.6	chr2	-	2	17.3568	7.30448e-05	0.00258497
ENSG00000135390.21	chr12	-	3	10.1001	8.51558e-05	0.00295878
ENSG00000110700.7	chr11	-	2	16.8097	9.29338e-05	0.00317137
ENSG00000111639.8	chr12	-	2	16.7552	9.51555e-05	0.00319021
ENSG00000099622.14	chr19	+	3	9.95109	9.6846e-05	0.00319091
ENSG00000153187.20	chr1	-	4	7.46158	0.00010202	0.00330441
ENSG00000082458.12	chrX	+	3	9.8295	0.000107586	0.00342661
ENSG00000136156.15	chr13	+	3	9.77355	0.000112955	0.00353863
ENSG00000172270.22	chr19	+	5	6.08427	0.000119989	0.00365262
ENSG00000177000.13	chr1	-	4	7.33098	0.000120416	0.00365262
ENSG00000135447.17	chr12	-	2	16.1838	0.000122545	0.00365912
ENSG00000077522.14	chr1	+	3	9.65807	0.000124848	0.00367053
ENSG00000196502.12	chr16	-	2	15.9285	0.000137298	0.00397539
ENSG00000131143.10	chr16	+	3	9.49576	0.000143749	0.00408994
ENSG00000198755.11	chr6	+	2	15.7825	0.00014654	0.00408994
ENSG00000173641.18	chr1	-	2	15.766	0.000147674	0.00408994
ENSG00000211445.12	chr5	+	3	9.39119	0.000157442	0.00429817
ENSG00000182196.13	chr12	+	2	15.4417	0.000170688	0.00459414
ENSG00000062582.14	chr7	-	2	15.3758	0.000175876	0.00466804
ENSG00000099204.20	chr10	-	5	5.84033	0.000179687	0.00470387
ENSG00000170989.10	chr1	+	2	15.0663	0.000202084	0.00517589
ENSG00000148700.15	chr10	+	3	9.0989	0.000203136	0.00517589
ENSG00000143198.13	chr1	+	3	9.06776	0.000208745	0.00519905
ENSG00000108669.16	chr17	-	3	9.05286	0.000211484	0.00519905
ENSG00000170906.16	chr19	+	2	14.9444	0.000213502	0.00519905
ENSG00000116675.16	chr1	+	2	14.9297	0.000214927	0.00519905
ENSG00000136560.14	chr2	+	2	14.8939	0.000218511	0.00521968
ENSG00000198842.10	chr1	+	3	8.99889	0.000221712	0.00523076
ENSG00000196704.14	chr17	+	2	14.8025	0.000227646	0.00530526
ENSG00000142546.14	chr19	-	2	14.3991	0.00027336	0.00629386
ENSG00000110955.9	chr12	-	3	8.73212	0.000280223	0.00637507
ENSG00000142676.14	chr1	+	2	14.2577	0.000291637	0.00655669
ENSG00000204257.15	chr6	-	2	14.2352	0.000296817	0.00659556
ENSG00000149809.17	chr11	+	2	14.0501	0.00032052	0.00704039
ENSG00000178802.18	chr15	+	3	8.55705	0.000326824	0.00709728
ENSG00000114062.22	chr15	-	2	13.9254	0.000339324	0.00725346
ENSG00000161203.13	chr3	+	2	13.9108	0.000341607	0.00725346
ENSG00000105193.9	chr19	-	2	13.8008	0.00035938	0.00746013
ENSG00000265972.6	chr1	-	2	13.7937	0.000360555	0.00746013
ENSG00000189403.15	chr13	-	4	6.46599	0.000363052	0.00746013
ENSG00000116132.12	chr1	+	3	8.40927	0.000372384	0.00747392
ENSG00000197694.18	chr9	+	2	13.718	0.000373186	0.00747392
ENSG00000108946.15	chr17	+	4	6.43987	0.000375456	0.00747392
ENSG00000131016.17	chr6	+	3	8.38705	0.000381894	0.00752371
ENSG00000049759.20	chr18	+	2	13.6217	0.000390174	0.0076084
ENSG00000166140.17	chr15	+	2	13.454	0.000421365	0.00813362
ENSG00000100097.12	chr22	+	3	8.24978	0.000428745	0.00819333
ENSG00000130528.12	chr19	-	2	13.3336	0.000445547	0.00842509
ENSG00000008838.20	chr17	-	2	13.3263	0.000450122	0.00842509
ENSG00000109381.20	chr4	-	2	13.2812	0.000456341	0.00842509
ENSG00000213145.10	chr14	+	2	13.2709	0.000458509	0.00842509
ENSG00000105220.17	chr19	+	3	8.04216	0.000515239	0.00937736
ENSG00000198125.13	chr22	-	5	5.19247	0.00052604	0.0094836
ENSG00000136436.15	chr17	+	3	8.00309	0.000533418	0.00952675
ENSG00000071082.11	chr2	+	2	12.8125	0.000567209	0.0100275
ENSG00000139567.13	chr12	+	3	7.92458	0.00057195	0.0100275
ENSG00000114867.22	chr3	+	3	7.89385	0.000587789	0.0102115
ENSG00000073578.17	chr5	+	3	7.87668	0.000596828	0.0102646
ENSG00000163110.15	chr4	+	3	7.86794	0.00060159	0.0102646
ENSG00000117616.18	chr1	-	2	12.64	0.000614503	0.0103433
ENSG00000185215.11	chr14	+	2	12.6485	0.000617025	0.0103433
ENSG00000014641.21	chr2	+	2	12.5586	0.000638439	0.0106092
ENSG00000204310.13	chr6	-	2	12.3752	0.000695427	0.0114566
ENSG00000146701.12	chr7	+	2	12.2288	0.000744822	0.0121654
ENSG00000117228.11	chr1	-	2	12.1852	0.000760379	0.0122354
ENSG00000182899.17	chr3	+	2	12.1809	0.000761908	0.0122354
ENSG00000115365.12	chr2	-	2	12.0453	0.000811843	0.0127222
ENSG00000166206.15	chr15	-	2	12.016	0.000823326	0.0127222
ENSG00000162595.7	chr1	-	2	12.0285	0.0008244	0.0127222
ENSG00000198157.11	chrX	-	2	12.0101	0.000825408	0.0127222
ENSG00000151150.22	chr10	-	4	5.82663	0.000825514	0.0127222
ENSG00000149932.17	chr16	+	2	11.9844	0.000835449	0.0127724
ENSG00000126267.11	chr19	+	2	11.6788	0.000965297	0.0146403
ENSG00000198363.18	chr8	-	3	7.32026	0.000980859	0.0147592
ENSG00000173812.11	chr17	+	2	11.6167	0.000993881	0.0148383
ENSG00000187720.14	chr15	+	2	11.5438	0.00102905	0.0151137
ENSG00000123080.12	chr1	+	2	11.5367	0.00103226	0.0151137
ENSG00000100124.15	chr22	-	2	11.529	0.00103605	0.0151137
ENSG00000198715.13	chr1	-	2	11.4909	0.00105493	0.0152725
ENSG00000013563.14	chrX	-	2	11.4565	0.00107229	0.0154071
ENSG00000236714.3	chr5	+	2	11.3856	0.00110996	0.0157608
ENSG00000143322.21	chr1	-	2	11.3884	0.0011134	0.0157608
ENSG00000148120.17	chr9	+	3	7.16957	0.00112287	0.015778
ENSG00000261371.6	chr17	-	2	11.3292	0.00113913	0.0158896
ENSG00000173272.16	chr2	-	2	11.2403	0.00118837	0.0164563
ENSG00000127483.19	chr1	-	2	11.2252	0.00119699	0.0164565
ENSG00000039523.20	chr16	+	2	11.1666	0.00123088	0.0168014
ENSG00000224397.7	chr20	+	2	11.118	0.00125999	0.0170251
ENSG00000101605.13	chr18	-	2	11.1096	0.00126508	0.0170251
ENSG00000119729.12	chr2	+	3	7.01479	0.00129057	0.0172467
ENSG00000134321.13	chr2	+	2	11.0381	0.00131715	0.0174734
ENSG00000115602.17	chr2	+	2	11.0243	0.00132582	0.0174734
ENSG00000226742.4	chr18	+	2	10.9868	0.00134125	0.0175557
ENSG00000151414.15	chr1	+	2	10.9591	0.00135911	0.0176073
ENSG00000012061.16	chr19	-	5	4.61823	0.00136362	0.0176073
ENSG00000132205.11	chr18	+	2	10.9174	0.00138655	0.0177832
ENSG00000177830.18	chr11	-	2	10.8587	0.00142607	0.0181681
ENSG00000135241.17	chr7	-	2	10.8068	0.00146197	0.0185021
ENSG00000120071.15	chr17	-	2	10.7922	0.00147492	0.0185433
ENSG00000105643.10	chr19	+	3	6.81231	0.00154902	0.0192442
ENSG00000082014.17	chr7	-	2	10.6844	0.00155081	0.0192442
ENSG00000008056.14	chrX	-	2	10.665	0.00156503	0.0192953
ENSG00000085733.16	chr11	+	2	10.6368	0.00158641	0.0194027
ENSG00000092841.19	chr12	+	2	10.6268	0.00159405	0.0194027
ENSG00000156298.13	chrX	+	2	10.5688	0.00163916	0.0196118
ENSG00000077150.20	chr10	+	2	10.5662	0.0016412	0.0196118
ENSG00000140795.13	chr16	-	4	5.2939	0.00164202	0.0196118
ENSG00000204256.14	chr6	+	3	6.73744	0.00165741	0.0196728
ENSG00000141736.14	chr17	+	2	10.5286	0.00167117	0.0197136
ENSG00000277791.5	chr17	+	2	10.4999	0.00169447	0.0198312
ENSG00000163964.18	chr3	+	2	10.4908	0.00170189	0.0198312
ENSG00000198467.16	chr9	-	4	5.26042	0.00171485	0.019861
ENSG00000101335.10	chr20	+	3	6.68499	0.00173811	0.019967
ENSG00000128918.15	chr15	-	3	6.67529	0.00175343	0.019967
ENSG00000122367.20	chr10	+	2	10.4267	0.00175534	0.019967
ENSG00000142507.10	chr17	+	2	10.3944	0.00178295	0.020161
ENSG00000093167.18	chr3	-	2	10.3035	0.001863	0.0209423
ENSG00000166228.9	chr10	-	2	10.2865	0.00187846	0.0209926
ENSG00000169554.22	chr2	-	3	6.56265	0.00194144	0.0215452
ENSG00000144824.21	chr3	+	3	6.56081	0.00195046	0.0215452
ENSG00000058056.10	chr3	+	3	6.54239	0.00197742	0.0217175
ENSG00000072062.15	chr19	-	2	10.1315	0.00202492	0.0221121
ENSG00000108515.18	chr17	+	2	10.0774	0.00207918	0.0225756
ENSG00000065989.16	chr19	+	2	10.056	0.00210049	0.0226781
ENSG00000099968.18	chr22	+	3	6.46179	0.00212736	0.0228393
ENSG00000131196.18	chr18	+	2	10.0191	0.00214863	0.0228526
ENSG00000114861.23	chr3	-	5	4.34276	0.00215252	0.0228526
ENSG00000114923.17	chr2	+	4	5.06558	0.0022065	0.0232963
ENSG00000138085.17	chr2	+	2	9.90256	0.00226322	0.0237638
ENSG00000169398.19	chr8	-	2	9.88011	0.00228811	0.0238939
ENSG00000173451.7	chr12	+	2	9.85244	0.00233145	0.0242141
ENSG00000176046.9	chr16	-	2	9.82293	0.00235277	0.0243035
ENSG00000146083.12	chr5	-	2	9.79127	0.00238939	0.024403
ENSG00000008130.15	chr1	-	2	9.79115	0.00238954	0.024403
ENSG00000173281.5	chr8	-	2	9.78193	0.00240071	0.024403
ENSG00000132938.22	chr13	+	2	9.70417	0.00249321	0.0250551
ENSG00000123143.13	chr19	+	2	9.68724	0.00251393	0.0250551
ENSG00000136942.15	chr9	-	3	6.26562	0.00254246	0.0250551
ENSG00000160209.19	chr21	+	3	6.26437	0.00254537	0.0250551
ENSG00000132507.18	chr17	+	2	9.66057	0.00254692	0.0250551
ENSG00000099991.18	chr22	+	2	9.65647	0.00255204	0.0250551
ENSG00000177885.15	chr17	-	2	9.65279	0.00255664	0.0250551
ENSG00000169925.17	chr9	-	2	9.60127	0.00262191	0.0254405
ENSG00000138347.16	chr10	+	2	9.60074	0.00262259	0.0254405
ENSG00000179632.10	chr8	+	2	9.57714	0.00265308	0.0256062
ENSG00000183023.18	chr2	-	3	6.21198	0.00266969	0.025637
ENSG00000168405.17	chr6	-	3	6.20239	0.00269311	0.0257327
ENSG00000142599.19	chr1	-	6	3.74914	0.00273327	0.0257771
ENSG00000131730.16	chr5	+	3	6.18625	0.0027333	0.0257771
ENSG00000145901.16	chr5	-	2	9.52004	0.00273823	0.0257771
ENSG00000128595.17	chr7	+	2	9.48858	0.00277078	0.0259557
ENSG00000140264.21	chr15	+	3	6.13719	0.00285825	0.0266445
ENSG00000140105.18	chr14	-	2	9.40721	0.0028855	0.0267679
ENSG00000109756.9	chr4	+	5	4.16188	0.00290379	0.0267773
ENSG00000167680.17	chr19	-	2	9.38557	0.00291454	0.0267773
ENSG00000160299.17	chr21	+	2	9.38058	0.00293318	0.0268197
ENSG00000111640.15	chr12	+	3	6.08445	0.00299909	0.0272917
ENSG00000178982.10	chr19	+	2	9.29289	0.00305047	0.0276278
ENSG00000140632.17	chr16	-	3	6.05897	0.00306932	0.0276673
ENSG00000203709.12	chr1	-	2	9.23554	0.00313789	0.0281526
ENSG00000178209.16	chr8	-	7	3.36937	0.00316934	0.0283019
ENSG00000125618.18	chr2	-	2	9.16336	0.00325158	0.0289012
ENSG00000138594.14	chr15	+	2	9.14103	0.00328762	0.0290022
ENSG00000008853.17	chr8	+	3	5.97877	0.00330255	0.0290022
ENSG00000186716.21	chr22	+	2	9.12823	0.00330847	0.0290022
ENSG00000080854.16	chr11	-	2	9.0762	0.0033946	0.0296214
ENSG00000132475.10	chr17	-	3	5.94155	0.00341715	0.0296826
ENSG00000152795.18	chr4	-	2	9.02626	0.00347949	0.0300873
ENSG00000147684.10	chr8	+	2	9.0138	0.00350152	0.0301414
ENSG00000166710.21	chr15	+	2	8.97181	0.00357507	0.0306366
ENSG00000150093.20	chr10	-	2	8.94815	0.00361668	0.0308548
ENSG00000187079.20	chr11	+	2	8.92867	0.00365176	0.0310156
ENSG00000166278.15	chr6	+	2	8.90607	0.00369291	0.0312263
ENSG00000004799.8	chr7	-	3	5.82456	0.00381249	0.0320954
ENSG00000178188.14	chr16	+	2	8.79963	0.00389326	0.0325817
ENSG00000114853.15	chr3	+	2	8.7939	0.00390435	0.0325817
ENSG00000087074.8	chr19	+	2	8.72823	0.00403453	0.0334922
ENSG00000102531.16	chr13	+	3	5.75624	0.0040485	0.0334922
ENSG00000163485.17	chr1	+	2	8.67031	0.00415196	0.0342
ENSG00000064225.12	chr3	+	2	8.61726	0.00426319	0.034843
ENSG00000005882.12	chr17	+	2	8.61571	0.00426649	0.034843
ENSG00000122378.14	chr10	+	2	8.59492	0.00431097	0.0350564
ENSG00000196482.18	chr1	-	4	4.54266	0.00434701	0.0351997
ENSG00000126226.22	chr13	-	2	8.56789	0.00436949	0.0352324
ENSG00000175550.8	chr11	+	2	8.49895	0.00452255	0.036293
ENSG00000198624.13	chr5	-	2	8.48796	0.00454746	0.036293
ENSG00000101161.8	chr20	+	2	8.47651	0.00457357	0.036293
ENSG00000185236.12	chr19	+	2	8.47502	0.00457699	0.036293
ENSG00000164741.15	chr8	-	3	5.6026	0.00466154	0.0368107
ENSG00000198796.7	chr18	-	2	8.40392	0.00474273	0.0372977
ENSG00000143761.16	chr1	+	2	8.39465	0.0047648	0.0373178
ENSG00000113441.16	chr5	+	2	8.37515	0.00481157	0.0375303
ENSG00000102024.18	chrX	+	2	8.36427	0.00483787	0.037582
ENSG00000144560.15	chr3	-	4	4.45354	0.00488021	0.0377574
ENSG00000134905.17	chr13	-	2	8.32395	0.00493665	0.0378931
ENSG00000198626.17	chr1	+	3	5.53931	0.00494116	0.0378931
ENSG00000047849.21	chr3	-	4	4.44148	0.00495723	0.0378931
ENSG00000073536.18	chr17	-	2	8.28385	0.00505684	0.0385005
ENSG00000170871.12	chr4	+	2	8.20519	0.00523998	0.0397365
ENSG00000100316.16	chr22	-	2	8.17979	0.00530799	0.0400931
ENSG00000130844.19	chr19	+	2	8.16714	0.0053412	0.0401852
ENSG00000107317.13	chr9	+	3	5.44152	0.00540639	0.0405161
ENSG00000167244.21	chr11	-	4	4.35738	0.00552932	0.0411565
ENSG00000185201.17	chr11	+	2	8.09638	0.00553491	0.0411565
ENSG00000075413.19	chr14	+	2	8.07273	0.00560128	0.0414886
ENSG00000136710.10	chr2	-	2	8.0486	0.00566982	0.0418341
ENSG00000166317.12	chr10	-	2	7.96785	0.00590641	0.0434121
ENSG00000105323.17	chr19	+	2	7.9349	0.00600484	0.0438858
ENSG00000185010.15	chrX	-	2	7.92092	0.00604743	0.0438858
ENSG00000138867.17	chr22	-	2	7.919	0.00605332	0.0438858
ENSG00000178980.15	chr19	+	2	7.91616	0.00606272	0.0438858
ENSG00000129422.14	chr8	-	3	5.30618	0.00612418	0.044057
ENSG00000105701.16	chr19	-	3	5.30472	0.00613248	0.044057
ENSG00000226306.6	chr5	+	2	7.87376	0.00619346	0.0442479
ENSG00000136143.16	chr13	-	2	7.86997	0.00620535	0.0442479
ENSG00000112419.14	chr6	+	2	7.81603	0.00637722	0.0453044
ENSG00000133835.17	chr5	+	2	7.79325	0.00645127	0.0456603
ENSG00000002933.9	chr7	+	2	7.78597	0.00647512	0.0456603
ENSG00000241837.7	chr21	-	3	5.2253	0.00659903	0.046363
ENSG00000170027.7	chr7	-	2	7.6569	0.00691371	0.048396
ENSG00000176728.10	chrY	-	2	7.64503	0.00695556	0.0485113
ENSG00000164091.12	chr3	-	2	7.63651	0.00698578	0.0485448
ENSG00000160014.17	chr19	+	2	7.62248	0.00703583	0.0486574
ENSG00000172239.14	chr5	-	2	7.61073	0.00707802	0.0486574
ENSG00000100284.22	chr22	+	2	7.61064	0.00707837	0.0486574
ENSG00000104325.7	chr8	+	2	7.5973	0.00712658	0.0486689
ENSG00000010256.11	chr3	-	2	7.59631	0.00713097	0.0486689
ENSG00000135679.25	chr12	+	2	7.57561	0.00720574	0.0490041
ENSG00000175084.12	chr2	+	4	4.14534	0.0072951	0.0494359
ENSG00000158856.18	chr8	+	4	4.12868	0.00744221	0.0502546
ENSG00000175287.19	chr9	+	2	7.49525	0.00750709	0.0505142
ENSG00000135486.19	chr12	+	2	7.47776	0.00757442	0.0507885
ENSG00000133460.19	chr22	+	2	7.46609	0.00761965	0.0509131
ENSG00000104529.17	chr8	-	2	7.45683	0.00765577	0.0509762
ENSG00000197746.14	chr10	-	3	5.04984	0.00776235	0.0515064
ENSG00000184939.16	chr16	+	2	7.41487	0.00782168	0.0517205
ENSG00000115963.14	chr2	-	2	7.39204	0.00791436	0.0521529
ENSG00000253320.7	chr8	+	2	7.38893	0.00794689	0.0521873
ENSG00000164125.16	chr4	-	2	7.25982	0.00846801	0.055419
ENSG00000184752.13	chr12	-	2	7.24439	0.00853529	0.0556688
ENSG00000197702.14	chr11	+	3	4.93994	0.00859406	0.0558614
ENSG00000114480.13	chr3	-	2	7.20889	0.00869315	0.056314
ENSG00000196419.13	chr22	+	2	7.20091	0.00872797	0.0563485
ENSG00000120616.16	chr10	-	2	7.14644	0.00897578	0.0577532
ENSG00000104763.20	chr8	-	7	2.90905	0.0090621	0.058113
ENSG00000142875.19	chr1	+	2	7.04549	0.00945464	0.0602086
ENSG00000084090.14	chr2	-	2	7.04154	0.00947389	0.0602086
ENSG00000198964.14	chr10	-	2	7.0396	0.0094834	0.0602086
ENSG00000158747.15	chr1	+	2	7.02742	0.00954312	0.0603871
ENSG00000162819.12	chr1	+	2	7.01426	0.0096081	0.0605976
ENSG00000143226.15	chr1	+	2	7.00159	0.00969979	0.06084
ENSG00000074416.14	chr3	-	2	6.99396	0.00971021	0.06084
ENSG00000134982.17	chr5	+	2	6.97851	0.00978704	0.061121
ENSG00000076555.15	chr12	+	4	3.88603	0.0102008	0.0631521
ENSG00000176946.12	chr2	-	2	6.89833	0.0102011	0.0631521
ENSG00000234438.5	chr15	+	2	6.89637	0.0102114	0.0631521
ENSG00000198832.10	chr22	-	2	6.87162	0.010343	0.0637598
ENSG00000069424.15	chr1	+	3	4.71695	0.0105725	0.064965
ENSG00000101557.15	chr18	+	2	6.8002	0.0107329	0.0657387
ENSG00000106631.8	chr7	-	2	6.77114	0.0109224	0.066686
ENSG00000077782.21	chr8	-	2	6.75933	0.0109628	0.0667195
ENSG00000166974.13	chr18	+	2	6.74499	0.0110447	0.0670046
ENSG00000155366.17	chr1	-	2	6.72509	0.0111594	0.0674863
ENSG00000129657.16	chr17	+	3	4.65503	0.0112	0.0675006
ENSG00000175334.8	chr11	+	2	6.70886	0.0112539	0.0675006
ENSG00000103710.11	chr15	-	2	6.70222	0.0112939	0.0675006
ENSG00000080189.15	chr20	-	2	6.70048	0.0113031	0.0675006
ENSG00000130811.12	chr19	-	2	6.68659	0.011385	0.0675092
ENSG00000177426.22	chr18	+	3	4.63725	0.0113878	0.0675092
ENSG00000139112.11	chr12	+	3	4.63504	0.0114105	0.0675092
ENSG00000088986.11	chr12	+	2	6.66525	0.011512	0.0677757
ENSG00000219626.9	chr2	+	2	6.66284	0.0115265	0.0677757
ENSG00000163412.13	chr3	-	2	6.64654	0.0116247	0.0681433
ENSG00000151247.13	chr4	-	2	6.61606	0.0118106	0.0690214
ENSG00000087274.17	chr4	+	3	4.58496	0.0119558	0.0696572
ENSG00000172380.6	chr1	-	2	6.57529	0.0120641	0.0700746
ENSG00000128951.14	chr15	+	2	6.53785	0.0123021	0.0712401
ENSG00000178607.17	chr17	-	2	6.52883	0.0123611	0.071366
ENSG00000168386.18	chr3	-	2	6.48149	0.0126705	0.0729318
ENSG00000152556.17	chr12	+	5	3.25172	0.0129808	0.0744933
ENSG00000130175.10	chr19	+	2	6.42757	0.0130318	0.0745621
ENSG00000126709.16	chr1	-	2	6.38957	0.0132947	0.0758393
ENSG00000177311.11	chr3	+	2	6.38138	0.0133508	0.0759324
ENSG00000266412.6	chr10	-	2	6.34873	0.0135812	0.0768463
ENSG00000150764.14	chr11	+	3	4.44756	0.0135919	0.0768463
ENSG00000143013.13	chr1	+	2	6.32506	0.0137519	0.0775219
ENSG00000146147.15	chr6	+	2	6.31025	0.0138581	0.0777715
ENSG00000148396.18	chr9	-	2	6.30757	0.0138776	0.0777715
ENSG00000125520.14	chr20	+	3	4.39969	0.0142137	0.0794223
ENSG00000166681.14	chrX	+	2	6.25599	0.0142598	0.0794475
ENSG00000095637.22	chr10	-	2	6.23262	0.014435	0.0801897
ENSG00000063177.13	chr19	-	2	6.21481	0.0145709	0.0806794
ENSG00000163565.19	chr1	+	4	3.60822	0.0146346	0.0806794
ENSG00000187498.16	chr13	-	2	6.2025	0.0146667	0.0806794
ENSG00000159592.11	chr1	-	3	4.36431	0.014692	0.0806794
ENSG00000228300.14	chr19	+	2	6.18726	0.0147837	0.0809501
ENSG00000124942.14	chr11	-	3	4.31346	0.0154081	0.083893
ENSG00000166741.8	chr11	+	2	6.11313	0.0154089	0.083893
ENSG00000152689.18	chr2	+	3	4.30924	0.015469	0.0839809
ENSG00000167766.19	chr19	-	2	6.08915	0.0155685	0.0842815
ENSG00000184640.20	chr17	+	4	3.54456	0.0158951	0.0858064
ENSG00000105379.10	chr19	-	2	6.03572	0.0160154	0.0862123
ENSG00000117625.14	chr1	+	2	6.00571	0.0162704	0.0873389
ENSG00000204084.13	chr1	-	2	5.98421	0.0164565	0.0878704
ENSG00000112531.17	chr6	+	2	5.9838	0.0164613	0.0878704
ENSG00000198521.12	chr19	-	2	5.97743	0.0165157	0.0879148
ENSG00000063244.13	chr19	+	2	5.96453	0.0166289	0.088272
ENSG00000179409.11	chr17	-	2	5.92917	0.0169435	0.0896925
ENSG00000172493.22	chr4	+	3	4.18746	0.0173391	0.0915089
ENSG00000149187.18	chr11	-	2	5.8771	0.017418	0.0915089
ENSG00000068028.17	chr3	-	2	5.87578	0.0174303	0.0915089
ENSG00000197360.9	chr19	-	2	5.86903	0.0174929	0.0915859
ENSG00000128567.17	chr7	-	2	5.8573	0.0176022	0.091691
ENSG00000100138.15	chr22	-	3	4.1687	0.017647	0.091691
ENSG00000156709.15	chrX	-	3	4.16739	0.0176686	0.091691
ENSG00000173511.10	chr11	+	2	5.84636	0.0177049	0.091691
ENSG00000231500.7	chr6	+	2	5.78613	0.0183154	0.0945965
ENSG00000140718.21	chr16	+	2	5.75184	0.0186181	0.0959006
ENSG00000110047.18	chr11	-	2	5.73158	0.0188215	0.0966877
ENSG00000186104.11	chr11	-	2	5.69708	0.0191698	0.0982129
ENSG00000134590.14	chrX	+	2	5.68576	0.0192858	0.0985435
ENSG00000106772.18	chr9	-	2	5.67709	0.0193811	0.0985652
ENSG00000140382.15	chr15	+	2	5.67121	0.0194363	0.0985652
ENSG00000008294.21	chr17	-	2	5.66963	0.0194528	0.0985652
ENSG00000075234.17	chr22	+	2	5.66543	0.0194964	0.0985652
ENSG00000082438.18	chr2	-	2	5.64307	0.0197307	0.0994865
ENSG00000004776.13	chr19	-	2	5.63576	0.0198093	0.0996199
ENSG00000072210.19	chr17	+	2	5.625	0.0199223	0.0997331
ENSG00000163072.16	chr2	+	2	5.6167	0.0200109	0.0997331
ENSG00000134294.14	chr12	-	2	5.6136	0.0200441	0.0997331
ENSG00000177119.17	chr12	+	2	5.61225	0.0200586	0.0997331
ENSG00000107104.20	chr9	+	2	5.60907	0.0200928	0.0997331
ENSG00000165810.17	chr5	+	3	4.01839	0.0203228	0.100614
ENSG00000138835.22	chr9	+	6	2.72451	0.020395	0.10071
ENSG00000138757.15	chr4	-	2	5.56862	0.0205326	0.100991
ENSG00000178149.17	chr3	-	2	5.56634	0.0205576	0.100991
ENSG00000132561.14	chr8	+	2	5.56281	0.0206381	0.101108
ENSG00000101413.12	chr20	+	3	3.9995	0.0206871	0.101108
ENSG00000172037.14	chr3	-	2	5.54617	0.0207811	0.101308
ENSG00000246273.8	chr11	+	2	5.5064	0.0212291	0.103229
ENSG00000146729.10	chr7	+	2	5.49189	0.0213951	0.103772
ENSG00000086848.15	chr11	-	2	5.47721	0.0215704	0.104224
ENSG00000163399.16	chr1	+	2	5.47436	0.0215974	0.104224
ENSG00000167703.15	chr17	-	2	5.44017	0.021998	0.105889
ENSG00000156958.15	chr15	+	2	5.39611	0.0225256	0.108157
ENSG00000099260.11	chr1	+	2	5.39143	0.0225825	0.108158
ENSG00000169122.11	chr8	+	2	5.38392	0.022674	0.108325
ENSG00000137449.17	chr4	+	2	5.36094	0.0229564	0.109401
ENSG00000109819.9	chr4	-	2	5.35966	0.0230159	0.109411
ENSG00000133027.18	chr17	-	2	5.31999	0.0234692	0.111289
ENSG00000095370.20	chr9	-	3	3.85431	0.0237177	0.112189
ENSG00000113580.15	chr5	-	2	5.29294	0.0238144	0.112369
ENSG00000221983.8	chr19	+	2	5.28737	0.0238862	0.112421
ENSG00000105401.9	chr19	-	2	5.27435	0.0240548	0.112421
ENSG00000118194.20	chr1	-	7	2.4692	0.0241181	0.112421
ENSG00000149115.14	chr11	-	3	3.83654	0.0241182	0.112421
ENSG00000149273.15	chr11	+	2	5.26347	0.0241966	0.112421
ENSG00000105223.20	chr19	+	3	3.83169	0.0242287	0.112421
ENSG00000111642.16	chr12	-	3	3.83132	0.0242373	0.112421
ENSG00000188176.12	chr17	+	2	5.2381	0.0245309	0.113366
ENSG00000140939.14	chr16	+	2	5.23346	0.0245926	0.113366
ENSG00000161513.12	chr17	-	2	5.23147	0.0246191	0.113366
ENSG00000144802.11	chr3	+	2	5.22834	0.0247057	0.113492
ENSG00000171033.13	chr8	+	2	5.21737	0.0248092	0.113694
ENSG00000162458.13	chr1	+	2	5.20929	0.0249165	0.113912
ENSG00000104872.11	chr19	-	2	5.20371	0.0249919	0.113984
ENSG00000198728.11	chr10	-	2	5.19307	0.0251363	0.113995
ENSG00000115461.5	chr2	-	2	5.19297	0.0251392	0.113995
ENSG00000115306.16	chr2	+	3	3.79115	0.0251731	0.113995
ENSG00000126246.10	chr19	-	2	5.17659	0.0253618	0.114578
ENSG00000112773.16	chr6	-	2	5.1669	0.0254955	0.114816
ENSG00000204922.5	chr11	+	2	5.16406	0.0255347	0.114816
ENSG00000196531.14	chr12	-	3	3.76389	0.0258292	0.115868
ENSG00000115414.21	chr2	-	5	2.82341	0.0260425	0.116355
ENSG00000147408.14	chr8	-	3	3.75448	0.0260597	0.116355
ENSG00000139644.13	chr12	+	2	5.11631	0.0262066	0.116738
ENSG00000133401.16	chr5	+	2	5.09846	0.0264621	0.117561
ENSG00000106052.13	chr7	+	2	5.09472	0.0265143	0.117561
ENSG00000144476.6	chr2	+	2	5.07836	0.0267527	0.118344
ENSG00000153774.9	chr16	-	2	5.05569	0.0270832	0.119418
ENSG00000120833.14	chr12	+	4	3.1323	0.0271306	0.119418
ENSG00000171992.13	chr5	+	3	3.70982	0.0271832	0.119418
ENSG00000041982.16	chr9	-	2	5.04785	0.0272456	0.119418
ENSG00000237125.11	chr4	+	3	3.68453	0.0278394	0.12166
ENSG00000069275.13	chr1	-	2	5.00148	0.0278949	0.12166
ENSG00000185787.15	chr15	+	2	4.99798	0.027948	0.12166
ENSG00000109971.14	chr11	-	3	3.66874	0.0282593	0.122735
ENSG00000169813.16	chr10	-	3	3.65864	0.0285292	0.123627
ENSG00000080824.19	chr14	-	4	3.0917	0.0285948	0.12363
ENSG00000134419.15	chr16	-	2	4.94831	0.028716	0.123771
ENSG00000173918.15	chr17	+	5	2.76178	0.0287569	0.123771
ENSG00000075624.17	chr7	-	2	4.91879	0.0291844	0.125114
ENSG00000134758.14	chr18	+	2	4.91467	0.0292487	0.125114
ENSG00000119403.15	chr9	-	2	4.91364	0.0292653	0.125114
ENSG00000178573.7	chr16	-	2	4.89445	0.0295741	0.126152
ENSG00000106682.16	chr7	+	2	4.87694	0.0298587	0.127082
ENSG00000167658.16	chr19	-	3	3.60419	0.0300674	0.127686
ENSG00000147526.20	chr8	+	3	3.59926	0.0301773	0.127836
ENSG00000079819.19	chr6	-	2	4.85398	0.0302365	0.127836
ENSG00000122359.18	chr10	-	2	4.84947	0.0303113	0.12787
ENSG00000164951.16	chr8	+	2	4.84292	0.0304203	0.128047
ENSG00000161955.16	chr17	+	2	4.82177	0.0307753	0.129256
ENSG00000170348.9	chr14	-	2	4.81217	0.0309377	0.129653
ENSG00000182551.14	chr2	-	2	4.80733	0.03102	0.129714
ENSG00000159842.15	chr17	-	5	2.70919	0.0312764	0.130501
ENSG00000121769.8	chr1	-	2	4.78359	0.0314285	0.130587
ENSG00000104951.16	chr19	-	2	4.78328	0.0314338	0.130587
ENSG00000137075.18	chr9	-	3	3.55065	0.0315982	0.130985
ENSG00000136574.18	chr8	+	3	3.54115	0.0318837	0.13176
ENSG00000105409.19	chr19	-	2	4.75508	0.0319231	0.13176
ENSG00000129991.13	chr19	-	2	4.74648	0.0320759	0.131849
ENSG00000113578.18	chr5	-	2	4.7448	0.032104	0.131849
ENSG00000133142.18	chrX	+	2	4.7422	0.0321515	0.131849
ENSG00000119927.14	chr10	-	2	4.72833	0.0324025	0.132472
ENSG00000139146.14	chr12	-	2	4.72575	0.0324422	0.132472
ENSG00000173486.14	chr11	+	2	4.72156	0.0325172	0.132495
ENSG00000135926.15	chr2	-	4	2.98385	0.0328754	0.13367
ENSG00000120333.4	chr1	-	2	4.69444	0.0330063	0.133917
ENSG00000196313.11	chr7	+	2	4.66666	0.0335157	0.135546
ENSG00000135218.19	chr7	+	7	2.31707	0.0335495	0.135546
ENSG00000100243.21	chr22	-	2	4.65279	0.0337731	0.136161
ENSG00000132669.14	chr20	+	4	2.9562	0.0340718	0.136688
ENSG00000243678.12	chr17	+	2	4.63449	0.034116	0.136688
ENSG00000085831.16	chr1	-	3	3.46592	0.0342395	0.136688
ENSG00000183010.17	chr17	-	2	4.62671	0.0342627	0.136688
ENSG00000132386.11	chr17	+	2	4.62385	0.034317	0.136688
ENSG00000084674.15	chr2	-	2	4.6231	0.0343329	0.136688
ENSG00000101019.22	chr20	-	2	4.60847	0.0346098	0.137314
ENSG00000128563.13	chr7	+	2	4.60721	0.0346339	0.137314
ENSG00000136205.17	chr7	-	3	3.41678	0.0358732	0.141933
ENSG00000143420.19	chr1	-	2	4.53063	0.0361333	0.142667
ENSG00000087460.28	chr20	+	5	2.61165	0.0365728	0.144104
ENSG00000196652.12	chr7	+	2	4.50488	0.0366527	0.144122
ENSG00000132530.17	chr17	+	2	4.49835	0.0367874	0.144355
ENSG00000069020.18	chr5	+	4	2.89435	0.0369063	0.144524
ENSG00000117859.19	chr1	+	2	4.48738	0.0370103	0.144636
ENSG00000168916.15	chr5	-	3	3.35277	0.0381204	0.148669
ENSG00000262660.1	chr17	+	2	4.42658	0.0382823	0.148997
ENSG00000110031.13	chr11	-	2	4.40853	0.0386688	0.150195
ENSG00000115685.15	chr2	+	2	4.39362	0.0389912	0.15114
ENSG00000113916.18	chr3	-	2	4.38456	0.0391886	0.151598
ENSG00000083845.9	chr19	+	2	4.37936	0.0393022	0.15173
ENSG00000167863.12	chr17	-	2	4.35747	0.0397847	0.153126
ENSG00000181666.18	chr19	+	2	4.35571	0.0398239	0.153126
ENSG00000168542.16	chr2	+	2	4.34995	0.0400058	0.153516
ENSG00000075239.14	chr11	+	3	3.297	0.0401948	0.15382
ENSG00000090621.15	chr1	-	2	4.33624	0.0402589	0.15382
ENSG00000131370.16	chr3	-	2	4.33332	0.0403264	0.15382
ENSG00000145779.8	chr5	+	2	4.32512	0.0405635	0.154251
ENSG00000122406.14	chr1	+	2	4.31988	0.0406283	0.154251
ENSG00000165995.22	chr10	+	3	3.2837	0.0407064	0.154251
ENSG00000169375.16	chr15	-	2	4.31204	0.0408067	0.154251
ENSG00000134775.15	chr18	+	2	4.31045	0.040843	0.154251
ENSG00000176978.14	chr9	-	2	4.29032	0.0413053	0.155462
ENSG00000145703.16	chr5	+	2	4.28744	0.0413718	0.155462
ENSG00000225663.8	chr17	-	2	4.28239	0.041489	0.155462
ENSG00000163347.6	chr3	-	2	4.28238	0.0414891	0.155462
ENSG00000269313.5	chrX	+	2	4.27525	0.0416549	0.155778
ENSG00000100418.8	chr22	-	2	4.26934	0.041793	0.155989
ENSG00000160972.9	chr8	+	2	4.26381	0.0419226	0.156168
ENSG00000073670.14	chr17	+	2	4.24052	0.042473	0.157791
ENSG00000108387.15	chr17	-	3	3.23777	0.0425234	0.157791
ENSG00000079277.22	chr1	-	2	4.22728	0.0427893	0.158233
ENSG00000133065.11	chr1	-	2	4.2265	0.0428081	0.158233
ENSG00000100320.23	chr22	-	2	4.21245	0.0431467	0.15909
ENSG00000080546.13	chr6	-	2	4.20661	0.0432883	0.15909
ENSG00000168214.21	chr4	+	2	4.20655	0.0432899	0.15909
ENSG00000117419.16	chr1	-	2	4.20301	0.0433759	0.1591
ENSG00000198270.13	chr12	-	2	4.19769	0.0435075	0.159277
ENSG00000179010.15	chr4	+	2	4.1806	0.0439268	0.160505
ENSG00000166348.19	chr10	-	2	4.16421	0.0443334	0.161681
ENSG00000088682.14	chr16	+	2	4.15818	0.044482	0.161716
ENSG00000103994.18	chr15	-	3	3.18975	0.0445122	0.161716
ENSG00000169071.15	chr9	-	2	4.14973	0.044694	0.162069
ENSG00000168488.18	chr16	+	2	4.13862	0.0449742	0.162776
ENSG00000101224.18	chr20	+	2	4.13509	0.0450634	0.16279
ENSG00000179222.18	chrX	+	2	4.12576	0.0453008	0.163339
ENSG00000162614.19	chr1	+	3	3.16188	0.0457105	0.164506
ENSG00000145675.15	chr5	+	5	2.46202	0.0464292	0.166779
ENSG00000131873.7	chr15	-	2	4.07683	0.0465672	0.16695
ENSG00000234520.6	chr7	-	2	4.07442	0.0466517	0.16695
ENSG00000168734.14	chr20	+	2	4.05607	0.0471161	0.168297
ENSG00000115594.12	chr2	+	3	3.12278	0.047486	0.169302
ENSG00000119640.9	chr14	-	2	4.02089	0.048062	0.171036
ENSG00000273899.5	chr22	+	2	4.00398	0.048524	0.172359
ENSG00000182903.16	chr4	-	2	3.99893	0.0486628	0.172532
ENSG00000089225.20	chr12	-	4	2.67684	0.0488564	0.172897
ENSG00000172638.13	chr11	-	3	3.08842	0.0490239	0.173169
ENSG00000080503.24	chr9	+	4	2.67116	0.0492138	0.173519
ENSG00000105697.9	chr19	+	2	3.97368	0.0494206	0.173928
ENSG00000093072.18	chr22	-	2	3.95155	0.0499883	0.175602
ENSG00000143337.19	chr1	+	2	3.94713	0.0501122	0.175715
ENSG00000133943.21	chr14	+	2	3.94345	0.0502169	0.175738
ENSG00000101246.20	chr20	-	2	3.94043	0.0503028	0.175738
ENSG00000139132.15	chr12	+	4	2.65221	0.0504291	0.175858
ENSG00000103496.15	chr16	+	2	3.93016	0.050597	0.176122
ENSG00000171988.19	chr10	-	3	3.05071	0.0508191	0.176573
ENSG00000231721.7	chr7	-	2	3.91498	0.0510348	0.177001
ENSG00000204628.12	chr5	-	5	2.40003	0.051229	0.177203
ENSG00000136521.13	chr3	+	2	3.9066	0.0512785	0.177203
ENSG00000064205.11	chr20	+	2	3.88121	0.0520821	0.179341
ENSG00000105707.15	chr19	+	2	3.87693	0.0521509	0.179341
ENSG00000175216.15	chr11	-	2	3.87579	0.0521848	0.179341
ENSG00000177354.12	chr10	+	2	3.8729	0.0522725	0.179341
ENSG00000099917.17	chr22	+	3	3.01568	0.0525462	0.179957
ENSG00000275832.5	chr17	+	3	3.01016	0.052824	0.180492
ENSG00000179950.14	chr8	-	2	3.85216	0.0528916	0.180492
ENSG00000163156.12	chr1	+	2	3.81196	0.0541175	0.184347
ENSG00000104824.18	chr19	-	2	3.806	0.0543021	0.184646
ENSG00000102786.15	chr13	-	2	3.78644	0.054912	0.186389
ENSG00000100266.19	chr22	-	2	3.7793	0.0551365	0.186819
ENSG00000138162.19	chr10	+	4	2.5754	0.0556636	0.188271
ENSG00000137070.18	chr9	+	2	3.7544	0.055927	0.188592
ENSG00000105204.14	chr19	-	2	3.75038	0.0560557	0.188592
ENSG00000150636.17	chr18	+	2	3.74976	0.0560755	0.188592
ENSG00000187514.17	chr2	+	2	3.74734	0.0561534	0.188592
ENSG00000150347.17	chr10	+	2	3.69125	0.0579894	0.194417
ENSG00000174405.14	chr13	-	2	3.66947	0.0587171	0.196433
ENSG00000203879.12	chrX	+	3	2.89805	0.0587963	0.196433
ENSG00000078808.19	chr1	-	2	3.65725	0.0591308	0.197206
ENSG00000185973.12	chrX	-	2	3.65099	0.0593439	0.197572
ENSG00000084234.18	chr11	+	3	2.87587	0.0600567	0.199597
ENSG00000205678.8	chr4	-	2	3.62205	0.0603402	0.200191
ENSG00000258315.5	chr17	+	2	3.61503	0.0605844	0.200653
ENSG00000165912.16	chr11	-	2	3.609	0.0607951	0.201002
ENSG00000140743.8	chr16	-	2	3.59747	0.0612006	0.201618
ENSG00000159348.13	chr1	-	2	3.59681	0.0612237	0.201618
ENSG00000114126.18	chr3	-	3	2.85449	0.0612976	0.201618
ENSG00000134686.18	chr1	-	2	3.59018	0.061458	0.201798
ENSG00000117984.15	chr11	-	2	3.58526	0.0616327	0.202024
ENSG00000050820.17	chr16	-	3	2.84412	0.0619105	0.202525
ENSG00000164708.6	chr7	-	2	3.57342	0.0621159	0.202525
ENSG00000072310.17	chr17	-	2	3.57173	0.0621176	0.202525
ENSG00000143947.15	chr2	+	2	3.56554	0.0623381	0.202525
ENSG00000240849.11	chr20	-	2	3.56487	0.062362	0.202525
ENSG00000109654.16	chr4	+	2	3.56323	0.0624212	0.202525
ENSG00000183955.13	chr12	+	2	3.55678	0.0626542	0.202631
ENSG00000164733.22	chr8	-	3	2.83152	0.0626661	0.202631
ENSG00000079999.14	chr19	-	2	3.54375	0.0631273	0.203462
ENSG00000137507.11	chr11	-	2	3.54351	0.0631361	0.203462
ENSG00000048052.23	chr7	+	4	2.47462	0.0633507	0.20381
ENSG00000108852.15	chr17	-	2	3.51761	0.0640888	0.205838
ENSG00000079459.13	chr8	+	2	3.51158	0.0643127	0.206152
ENSG00000104967.8	chr19	-	2	3.50735	0.0644704	0.206152
ENSG00000167543.16	chr17	+	3	2.80062	0.0645415	0.206152
ENSG00000135316.19	chr6	-	2	3.5034	0.064618	0.206152
ENSG00000141552.18	chr17	+	2	3.48635	0.0652596	0.207275
ENSG00000167792.13	chr11	+	3	2.78802	0.0653255	0.207275
ENSG00000108953.17	chr17	-	2	3.48171	0.0654352	0.207275
ENSG00000164597.15	chr7	-	3	2.78512	0.0655068	0.207275
ENSG00000187098.17	chr3	+	3	2.78503	0.0655125	0.207275
ENSG00000125733.18	chr19	+	2	3.46729	0.0659846	0.208424
ENSG00000251562.8	chr11	+	2	3.46305	0.0661472	0.208593
ENSG00000086758.16	chrX	-	2	3.43033	0.0674157	0.212243
ENSG00000275215.1	chr21	+	2	3.42197	0.0677463	0.212933
ENSG00000118689.15	chr6	+	2	3.40538	0.0684032	0.214644
ENSG00000103316.12	chr16	-	2	3.39305	0.0688937	0.215829
ENSG00000072195.15	chr2	+	4	2.40539	0.0692267	0.216517
ENSG00000133067.18	chr1	+	3	2.72555	0.0693551	0.216565
ENSG00000179051.14	chr1	-	2	3.36498	0.0700297	0.218314
ENSG00000132471.12	chr17	-	2	3.34695	0.0707701	0.220263
ENSG00000167468.18	chr19	+	2	3.34025	0.0710475	0.220767
ENSG00000095066.12	chr19	-	3	2.69155	0.071654	0.221957
ENSG00000159023.22	chr1	+	2	3.32549	0.0716629	0.221957
ENSG00000058668.15	chr1	+	2	3.28945	0.0731896	0.226319
ENSG00000132906.18	chr1	-	2	3.28438	0.0734068	0.226624
ENSG00000145362.20	chr4	+	5	2.16713	0.0739093	0.227807
ENSG00000114391.13	chr3	-	2	3.23954	0.0753624	0.231912
ENSG00000135250.17	chr7	-	3	2.62958	0.0760442	0.233258
ENSG00000143401.15	chr1	-	2	3.22201	0.0761423	0.233258
ENSG00000184009.13	chr17	-	2	3.22153	0.076166	0.233258
ENSG00000042753.12	chr19	-	2	3.20505	0.0769055	0.235077
ENSG00000116667.15	chr1	+	2	3.2013	0.0770752	0.235077
ENSG00000188312.14	chr9	+	2	3.20012	0.0771288	0.235077
ENSG00000189350.13	chr2	+	2	3.19082	0.0775518	0.23599
ENSG00000172403.11	chr4	+	2	3.18175	0.0780308	0.23707
ENSG00000139218.18	chr12	-	2	3.17666	0.0782014	0.237154
ENSG00000186577.14	chr6	-	2	3.17437	0.0783067	0.237154
ENSG00000177666.17	chr11	+	2	3.16237	0.0788648	0.238466
ENSG00000161013.17	chr5	-	2	3.15831	0.0790517	0.238654
ENSG00000179915.24	chr2	-	3	2.58603	0.079293	0.238669
ENSG00000182093.16	chr21	+	2	3.15029	0.0794266	0.238669
ENSG00000166965.12	chr15	+	2	3.15018	0.0794315	0.238669
ENSG00000112992.18	chr5	+	2	3.14652	0.0796034	0.23881
ENSG00000137496.18	chr11	+	2	3.14359	0.0797412	0.238849
ENSG00000168958.20	chr2	+	2	3.13095	0.0803387	0.240262
ENSG00000068024.17	chr2	-	3	2.56766	0.0807051	0.24098
ENSG00000151503.13	chr11	-	2	3.11268	0.0812106	0.241752
ENSG00000137767.14	chr15	+	2	3.11085	0.0812987	0.241752
ENSG00000069399.15	chr19	+	2	3.11095	0.0813431	0.241752
ENSG00000143774.17	chr1	+	3	2.55234	0.0819019	0.243035
ENSG00000102606.18	chr13	+	4	2.27083	0.0822148	0.243311
ENSG00000160710.18	chr1	-	2	3.09119	0.0822495	0.243311
ENSG00000214063.11	chr11	+	2	3.08434	0.082584	0.243515
ENSG00000160801.14	chr3	+	2	3.08371	0.0826148	0.243515
ENSG00000176490.5	chr19	-	2	3.07987	0.0828026	0.243515
ENSG00000235109.7	chr6	-	2	3.07935	0.0828283	0.243515
ENSG00000079215.15	chr5	+	3	2.53826	0.0830182	0.243698
ENSG00000173163.10	chr2	+	2	3.06984	0.0832964	0.24414
ENSG00000156030.13	chr14	-	2	3.04754	0.0844056	0.246605
ENSG00000198947.17	chrX	-	3	2.51969	0.0845137	0.246605
ENSG00000124422.12	chr17	-	2	3.04292	0.0846374	0.246605
ENSG00000136603.14	chr3	+	2	3.04259	0.0846536	0.246605
ENSG00000054148.18	chr9	+	2	3.03374	0.0850999	0.247528
ENSG00000068308.14	chrX	-	2	3.02421	0.085583	0.248555
ENSG00000232119.8	chrX	+	2	3.02048	0.0857728	0.248728
ENSG00000242282.6	chr2	-	2	3.01773	0.0859133	0.248758
ENSG00000134287.10	chr12	-	2	3.01473	0.0860669	0.248826
ENSG00000122986.14	chr12	-	2	2.99303	0.0871853	0.251633
ENSG00000170365.10	chr4	+	2	2.99079	0.0873014	0.251633
ENSG00000196136.18	chr14	+	2	2.98907	0.0874377	0.251647
ENSG00000131759.18	chr17	+	3	2.48119	0.0877025	0.251734
ENSG00000108622.11	chr17	-	2	2.98254	0.0877316	0.251734
ENSG00000154678.18	chr7	-	2	2.97629	0.0880608	0.252239
ENSG00000123349.15	chr12	+	2	2.9743	0.0881716	0.252239
ENSG00000146112.12	chr6	-	3	2.47406	0.0883068	0.252248
ENSG00000086200.17	chr5	+	2	2.96194	0.0888157	0.252984
ENSG00000140403.12	chr15	+	2	2.96291	0.0888291	0.252984
ENSG00000052126.15	chr12	+	2	2.94107	0.0899294	0.255737
ENSG00000198668.13	chr14	+	2	2.9366	0.0901719	0.256045
ENSG00000115641.19	chr2	-	3	2.44706	0.0906818	0.256754
ENSG00000091428.18	chr2	+	2	2.92697	0.0906901	0.256754
ENSG00000105202.9	chr19	-	2	2.92013	0.0910621	0.257425
ENSG00000103091.15	chr16	-	2	2.91464	0.0913613	0.25789
ENSG00000134884.15	chr13	-	2	2.90991	0.0916223	0.258245
ENSG00000110321.19	chr11	-	6	1.91093	0.0930621	0.261917
ENSG00000205133.12	chr8	-	2	2.87423	0.0936	0.26283
ENSG00000278311.5	chr17	+	2	2.87314	0.0936614	0.26283
ENSG00000105568.18	chr19	+	2	2.86697	0.0940085	0.263417
ENSG00000205220.12	chr16	-	2	2.84156	0.0954542	0.266803
ENSG00000113742.14	chr5	+	4	2.15323	0.0954961	0.266803
ENSG00000130600.19	chr11	-	3	2.38655	0.0960728	0.26745
ENSG00000099875.16	chr19	-	2	2.82975	0.0961369	0.26745
ENSG00000068745.15	chr3	-	3	2.38475	0.0962377	0.26745
ENSG00000284969.1	chr11	-	2	2.82714	0.0962877	0.26745
ENSG00000111341.10	chr12	-	2	2.82468	0.0964809	0.267598
ENSG00000171385.10	chr1	-	2	2.82129	0.0966251	0.267609
ENSG00000244274.8	chr20	+	3	2.36953	0.0976617	0.270089
ENSG00000099797.15	chr19	+	2	2.80114	0.097805	0.270095
ENSG00000083857.14	chr4	-	2	2.79561	0.0981319	0.270606
ENSG00000110651.12	chr11	+	3	2.36057	0.0985086	0.271254
ENSG00000133121.21	chr13	-	3	2.35629	0.0989143	0.271975
ENSG00000100106.22	chr22	+	2	2.77698	0.0992428	0.271975
ENSG00000266173.7	chr17	-	2	2.77544	0.0993329	0.271975
ENSG00000158864.13	chr1	+	2	2.77533	0.0993398	0.271975
ENSG00000163635.20	chr3	+	2	2.76031	0.100245	0.27406
ENSG00000088387.19	chr13	-	2	2.7324	0.101952	0.278328
ENSG00000173175.15	chr3	-	3	2.32012	0.102426	0.279224
ENSG00000166949.17	chr15	+	2	2.71818	0.102834	0.279936
ENSG00000134333.14	chr11	+	2	2.71471	0.10305	0.280126
ENSG00000123636.18	chr2	-	2	2.71107	0.103278	0.280346
ENSG00000156414.19	chr14	+	2	2.69633	0.104207	0.282468
ENSG00000132334.17	chr10	+	3	2.29395	0.105045	0.284337
ENSG00000130024.15	chr6	-	2	2.67374	0.105647	0.285562
ENSG00000133818.14	chr11	-	2	2.66478	0.106223	0.286711
ENSG00000075240.17	chr22	+	2	2.66222	0.106388	0.286753
ENSG00000188549.12	chr15	-	2	2.65941	0.10657	0.286839
ENSG00000072818.12	chr17	+	2	2.64946	0.107218	0.287907
ENSG00000106211.10	chr7	+	2	2.64868	0.107268	0.287907
ENSG00000165629.20	chr10	+	3	2.26962	0.107541	0.288233
ENSG00000179094.16	chr17	-	2	2.63938	0.107878	0.28847
ENSG00000203880.12	chr20	+	2	2.63837	0.107946	0.28847
ENSG00000017797.13	chr18	+	2	2.63522	0.108152	0.28847
ENSG00000169045.17	chr5	-	2	2.63399	0.108233	0.28847
ENSG00000136895.19	chr9	+	2	2.62549	0.108795	0.289565
ENSG00000153048.11	chr16	-	2	2.61922	0.109212	0.290271
ENSG00000125741.5	chr19	-	2	2.61293	0.109632	0.290982
ENSG00000178127.13	chr18	+	3	2.24782	0.109828	0.291098
ENSG00000068831.19	chr11	-	3	2.22817	0.111933	0.29613
ENSG00000259498.1	chr15	-	2	2.57694	0.112071	0.29613
ENSG00000176155.19	chr17	-	2	2.57519	0.112191	0.29613
ENSG00000165868.16	chr10	-	2	2.5729	0.112348	0.296135
ENSG00000184182.19	chr2	+	2	2.56958	0.112577	0.296174
ENSG00000178796.13	chr1	+	2	2.56822	0.112673	0.296174
ENSG00000258289.9	chr14	+	2	2.55512	0.113579	0.298144
ENSG00000085276.19	chr3	-	3	2.21143	0.113758	0.298204
ENSG00000153113.24	chr5	+	5	1.88588	0.114172	0.298868
ENSG00000130592.17	chr11	+	3	2.20631	0.114324	0.298868
ENSG00000165795.23	chr14	-	3	2.19613	0.115452	0.301406
ENSG00000111678.11	chr12	+	2	2.52442	0.11574	0.30146
ENSG00000265681.7	chr18	-	2	2.52373	0.115789	0.30146
ENSG00000204482.11	chr6	+	2	2.51857	0.116157	0.30182
ENSG00000087008.16	chr4	-	2	2.51737	0.116243	0.30182
ENSG00000136153.20	chr13	+	3	2.18252	0.116981	0.302427
ENSG00000111245.17	chr12	-	3	2.18222	0.117067	0.302427
ENSG00000148180.21	chr9	+	6	1.78197	0.117074	0.302427
ENSG00000187288.12	chr3	-	2	2.5062	0.117109	0.302427
ENSG00000079435.10	chr19	-	2	2.49364	0.117954	0.303692
ENSG00000179526.17	chr8	-	3	2.17316	0.118044	0.303692
ENSG00000167740.10	chr17	+	2	2.49194	0.118076	0.303692
ENSG00000018625.15	chr1	+	2	2.48329	0.118707	0.304905
ENSG00000112936.19	chr5	+	4	1.97953	0.119036	0.305338
ENSG00000137843.12	chr15	+	2	2.463	0.120202	0.307793
ENSG00000163882.9	chr3	+	2	2.46148	0.120315	0.307793
ENSG00000134954.14	chr11	-	2	2.44647	0.121438	0.310251
ENSG00000116731.22	chr1	+	2	2.4412	0.121832	0.310842
ENSG00000272391.6	chr7	-	2	2.42906	0.12275	0.312016
ENSG00000166326.7	chr11	+	2	2.42435	0.123109	0.312016
ENSG00000119950.21	chr10	+	3	2.12935	0.123154	0.312016
ENSG00000117399.14	chr1	+	2	2.42274	0.123232	0.312016
ENSG00000159251.8	chr15	-	4	1.95176	0.123251	0.312016
ENSG00000071127.17	chr4	-	3	2.12836	0.123272	0.312016
ENSG00000076108.12	chr12	-	2	2.41953	0.123477	0.312123
ENSG00000141127.15	chr17	+	2	2.41378	0.123918	0.312823
ENSG00000124225.16	chr20	-	2	2.40064	0.124932	0.314733
ENSG00000167491.17	chr19	+	2	2.39971	0.125004	0.314733
ENSG00000179335.19	chr15	+	2	2.39086	0.125692	0.31605
ENSG00000163092.21	chr2	+	2	2.38374	0.126251	0.317039
ENSG00000101940.18	chrX	+	2	2.38019	0.126528	0.317141
ENSG00000154710.18	chr7	+	2	2.37897	0.126624	0.317141
ENSG00000102967.12	chr16	+	2	2.37535	0.12691	0.317317
ENSG00000182199.11	chr12	+	3	2.09615	0.127174	0.317317
ENSG00000166963.13	chr15	+	2	2.37177	0.127192	0.317317
ENSG00000169756.16	chr2	+	3	2.08788	0.128199	0.31941
ENSG00000007237.19	chr17	-	4	1.91727	0.128727	0.320309
ENSG00000105974.13	chr7	+	2	2.34871	0.129031	0.320648
ENSG00000150991.15	chr12	-	2	2.33509	0.130134	0.322968
ENSG00000143632.14	chr1	-	2	2.33092	0.130536	0.323547
ENSG00000213741.11	chr14	-	2	2.32666	0.130817	0.323824
ENSG00000075131.10	chr15	-	2	2.31729	0.131585	0.325304
ENSG00000051620.11	chr6	+	2	2.31342	0.131904	0.325563
ENSG00000129084.18	chr11	-	2	2.31188	0.132031	0.325563
ENSG00000187773.9	chr18	-	2	2.30384	0.132698	0.326417
ENSG00000120278.16	chr6	+	2	2.30281	0.132782	0.326417
ENSG00000077044.11	chr2	+	2	2.30153	0.13289	0.326417
ENSG00000173402.12	chr3	+	2	2.29843	0.133146	0.326626
ENSG00000137275.16	chr6	+	2	2.29548	0.133392	0.32681
ENSG00000122644.13	chr7	+	2	2.29214	0.133671	0.326872
ENSG00000174891.13	chr3	+	2	2.29109	0.133759	0.326872
ENSG00000114473.14	chr3	-	3	2.04088	0.134168	0.327453
ENSG00000170345.10	chr14	+	2	2.28419	0.134404	0.32761
ENSG00000196230.14	chr6	+	2	2.2804	0.13466	0.327815
ENSG00000278189.1	chr21	+	2	2.26837	0.135743	0.330031
ENSG00000157540.22	chr21	+	2	2.26359	0.136085	0.330278
ENSG00000106069.23	chr7	+	2	2.26236	0.13619	0.330278
ENSG00000136237.19	chr7	-	2	2.25649	0.136692	0.331076
ENSG00000131408.15	chr19	+	2	2.2508	0.137182	0.331521
ENSG00000130176.8	chr19	+	3	2.01787	0.137223	0.331521
ENSG00000196588.20	chr22	-	2	2.2459	0.137605	0.332024
ENSG00000170175.11	chr17	+	3	2.01107	0.138098	0.332793
ENSG00000119912.18	chr10	-	2	2.23759	0.138328	0.332927
ENSG00000115677.17	chr2	-	5	1.75821	0.138602	0.333168
ENSG00000132478.10	chr17	+	2	2.22977	0.139008	0.333724
ENSG00000160194.18	chr21	+	2	2.22274	0.139625	0.334784
ENSG00000130522.6	chr19	-	2	2.22005	0.139927	0.335088
ENSG00000109572.14	chr4	+	2	2.21273	0.140508	0.336058
ENSG00000108107.15	chr19	+	2	2.20804	0.140926	0.336612
ENSG00000159176.14	chr1	-	2	2.20618	0.141092	0.336612
ENSG00000123358.20	chr12	+	3	1.98146	0.142172	0.338767
ENSG00000264247.2	chr18	-	2	2.19008	0.142531	0.339198
ENSG00000128585.18	chr7	+	2	2.18365	0.143111	0.340005
ENSG00000138303.18	chr10	-	3	1.97256	0.143352	0.340005
ENSG00000114854.8	chr3	-	2	2.18044	0.143403	0.340005
ENSG00000166444.19	chr11	-	3	1.96498	0.144409	0.341966
ENSG00000143179.16	chr1	+	2	2.16479	0.144828	0.342532
ENSG00000111077.18	chr12	+	3	1.95368	0.146001	0.344505
ENSG00000116194.13	chr1	-	2	2.15182	0.146022	0.344505
ENSG00000107372.13	chr9	-	2	2.14888	0.146295	0.344722
ENSG00000241058.4	chr10	-	2	2.14362	0.146784	0.345176
ENSG00000012232.9	chr8	+	2	2.14292	0.146849	0.345176
ENSG00000134326.12	chr2	-	2	2.13807	0.147301	0.345735
ENSG00000153094.24	chr2	+	2	2.1365	0.147449	0.345735
ENSG00000167685.15	chr19	+	2	2.13446	0.147639	0.345759
ENSG00000267577.1	chr19	+	2	2.13021	0.148041	0.346274
ENSG00000197050.11	chr19	+	2	2.12818	0.148229	0.346292
ENSG00000162772.17	chr1	+	3	1.93502	0.14871	0.346991
ENSG00000161011.20	chr5	+	3	1.9314	0.149191	0.347547
ENSG00000019144.19	chr11	+	4	1.79915	0.149312	0.347547
ENSG00000154358.23	chr1	+	2	2.10919	0.150029	0.348522
ENSG00000156011.17	chr8	-	3	1.92517	0.150096	0.348522
ENSG00000129675.16	chrX	-	2	2.09012	0.151863	0.352198
ENSG00000011465.18	chr12	-	5	1.69415	0.15262	0.353524
ENSG00000254772.10	chr11	-	2	2.07968	0.152878	0.353692
ENSG00000081277.13	chr1	+	2	2.07057	0.15377	0.35461
ENSG00000124749.17	chr6	-	2	2.06997	0.153828	0.35461
ENSG00000204217.15	chr2	+	2	2.06994	0.153831	0.35461
ENSG00000141971.13	chr19	+	2	2.06513	0.154304	0.355095
ENSG00000143549.21	chr1	-	3	1.89623	0.154413	0.355095
ENSG00000127472.11	chr1	+	2	2.06116	0.154699	0.355323
ENSG00000124831.19	chr2	+	3	1.89019	0.15528	0.355718
ENSG00000157654.19	chr9	+	7	1.57122	0.15534	0.355718
ENSG00000132463.14	chr4	-	2	2.05377	0.155429	0.355718
ENSG00000037241.7	chr5	+	2	2.04978	0.155827	0.355836
ENSG00000171408.14	chr6	+	2	2.04952	0.155853	0.355836
ENSG00000204267.16	chr6	-	2	2.04313	0.156492	0.356717
ENSG00000175505.11	chr11	-	2	2.04088	0.156741	0.356717
ENSG00000163872.16	chr3	+	2	2.03864	0.156942	0.356717
ENSG00000156508.19	chr6	-	3	1.87895	0.156985	0.356717
ENSG00000055163.20	chr5	+	2	2.03007	0.157809	0.358029
ENSG00000196141.14	chr2	+	2	2.02878	0.157937	0.358029
ENSG00000124155.18	chr20	+	3	1.871	0.158202	0.358204
ENSG00000110911.17	chr12	-	2	2.01903	0.158928	0.359423
ENSG00000177169.10	chr12	+	2	2.01119	0.15973	0.360809
ENSG00000148450.13	chr10	+	2	2.00835	0.160023	0.361043
ENSG00000157514.16	chrX	-	2	2.00576	0.160289	0.361218
ENSG00000198336.9	chr17	+	3	1.85483	0.160707	0.361589
ENSG00000173065.13	chr17	-	2	2.0005	0.160832	0.361589
ENSG00000177098.9	chr11	-	2	1.98916	0.162012	0.363813
ENSG00000116685.16	chr1	-	2	1.98301	0.162718	0.364969
ENSG00000188191.15	chr7	-	2	1.97444	0.163554	0.366046
ENSG00000173801.17	chr17	-	2	1.97245	0.163764	0.366046
ENSG00000134897.14	chr13	+	2	1.97237	0.163772	0.366046
ENSG00000166402.9	chr11	+	2	1.96924	0.164103	0.366318
ENSG00000103852.13	chr15	-	2	1.96759	0.164278	0.366318
ENSG00000260549.2	chr16	+	2	1.96205	0.164866	0.367148
ENSG00000053747.17	chr18	+	3	1.82748	0.165034	0.367148
ENSG00000144524.18	chr2	+	2	1.95861	0.165233	0.367163
ENSG00000113140.11	chr5	-	2	1.95379	0.16575	0.367841
ENSG00000242259.9	chr22	-	2	1.95216	0.165923	0.367841
ENSG00000179988.15	chr10	+	2	1.94759	0.166414	0.368502
ENSG00000241878.11	chr22	-	2	1.9361	0.167656	0.370822
ENSG00000022267.19	chrX	+	5	1.62355	0.16961	0.374711
ENSG00000108389.9	chr17	-	2	1.91402	0.170073	0.375025
ENSG00000132170.23	chr3	+	2	1.91337	0.170145	0.375025
ENSG00000061938.20	chr3	-	2	1.9056	0.171056	0.376419
ENSG00000078596.11	chrX	-	2	1.9029	0.171307	0.376419
ENSG00000079805.18	chr19	+	2	1.90153	0.171458	0.376419
ENSG00000173406.16	chr1	-	2	1.90057	0.171565	0.376419
ENSG00000112893.10	chr5	+	2	1.89518	0.172167	0.377307
ENSG00000138772.13	chr4	+	2	1.88712	0.173072	0.378344
ENSG00000143951.16	chr2	-	3	1.77772	0.173216	0.378344
ENSG00000268858.2	chr20	-	2	1.88322	0.173512	0.378344
ENSG00000222041.11	chr2	+	2	1.883	0.173537	0.378344
ENSG00000130304.17	chr19	+	2	1.88217	0.173631	0.378344
ENSG00000172530.20	chr16	+	2	1.86737	0.175314	0.381577
ENSG00000246695.8	chr12	-	2	1.86188	0.175943	0.38251
ENSG00000122390.19	chr16	+	2	1.85406	0.176844	0.384032
ENSG00000100628.12	chr14	-	2	1.84901	0.177428	0.384863
ENSG00000172819.17	chr12	-	3	1.75098	0.177782	0.385194
ENSG00000141524.17	chr17	-	2	1.83156	0.179465	0.388167
ENSG00000118473.22	chr1	+	2	1.83077	0.17956	0.388167
ENSG00000127603.30	chr1	+	8	1.45891	0.181184	0.391234
ENSG00000014216.16	chr11	+	2	1.81358	0.181593	0.391675
ENSG00000142230.13	chr19	+	3	1.72625	0.182112	0.392352
ENSG00000197905.10	chr12	+	2	1.80566	0.182539	0.392781
ENSG00000137573.14	chr8	+	2	1.80415	0.182722	0.392781
ENSG00000178882.15	chr12	+	2	1.79555	0.183756	0.39456
ENSG00000126247.11	chr19	+	3	1.71299	0.184478	0.395664
ENSG00000067064.12	chr10	-	2	1.78581	0.184937	0.396205
ENSG00000166913.13	chr20	+	2	1.77986	0.185664	0.397316
ENSG00000156113.24	chr10	-	2	1.77136	0.186709	0.398727
ENSG00000203739.4	chr1	-	2	1.77109	0.18674	0.398727
ENSG00000183255.12	chr21	-	2	1.75437	0.188812	0.402702
ENSG00000143153.13	chr1	+	2	1.75182	0.189131	0.40293
ENSG00000198959.12	chr20	-	2	1.74445	0.190055	0.404449
ENSG00000133878.9	chr8	-	2	1.73989	0.190629	0.405219
ENSG00000147573.17	chr8	+	2	1.73791	0.190881	0.405305
ENSG00000067141.17	chr15	+	2	1.73456	0.191304	0.405751
ENSG00000184113.9	chr22	-	2	1.72373	0.192681	0.408048
ENSG00000205090.9	chr1	-	2	1.71898	0.193289	0.408048
ENSG00000181894.15	chr19	-	2	1.71882	0.19331	0.408048
ENSG00000066629.18	chr14	+	2	1.71341	0.194005	0.408048
ENSG00000106263.18	chr7	+	2	1.71252	0.19412	0.408048
ENSG00000164587.13	chr5	-	3	1.66066	0.194127	0.408048
ENSG00000107959.17	chr10	-	2	1.71104	0.194312	0.408048
ENSG00000188730.5	chr7	+	2	1.71099	0.194318	0.408048
ENSG00000023734.11	chr12	+	2	1.71037	0.194398	0.408048
ENSG00000117707.16	chr1	+	3	1.65856	0.194522	0.408048
ENSG00000162496.9	chr1	-	2	1.70512	0.195079	0.408768
ENSG00000124440.16	chr19	+	3	1.65029	0.196099	0.410454
ENSG00000162434.13	chr1	-	2	1.69493	0.196403	0.410642
ENSG00000125730.17	chr19	-	2	1.66717	0.200075	0.4161
ENSG00000136715.19	chr2	-	2	1.66457	0.200421	0.4161
ENSG00000068305.17	chr15	+	2	1.66423	0.200466	0.4161
ENSG00000141013.17	chr16	+	2	1.66369	0.200539	0.4161
ENSG00000133083.15	chr13	-	3	1.62675	0.200685	0.4161
ENSG00000225377.6	chr20	-	2	1.66253	0.200695	0.4161
ENSG00000067182.8	chr12	-	2	1.66211	0.200751	0.4161
ENSG00000142937.12	chr1	+	2	1.66209	0.200756	0.4161
ENSG00000008710.20	chr16	-	2	1.65544	0.201648	0.417496
ENSG00000108848.16	chr17	+	3	1.61816	0.202336	0.418326
ENSG00000156265.16	chr21	+	2	1.64938	0.202487	0.418326
ENSG00000213465.8	chr11	+	2	1.64701	0.202789	0.418499
ENSG00000155755.19	chr2	-	2	1.64326	0.2033	0.4191
ENSG00000183044.12	chr16	+	2	1.63303	0.204708	0.421548
ENSG00000143799.14	chr1	-	2	1.62756	0.205452	0.422625
ENSG00000132819.17	chr20	+	2	1.62123	0.206329	0.423973
ENSG00000196924.19	chrX	-	3	1.59416	0.207129	0.425159
ENSG00000132005.9	chr19	-	2	1.61218	0.207587	0.425517
ENSG00000077157.22	chr1	+	2	1.61102	0.207748	0.425517
ENSG00000124181.14	chr20	+	2	1.59538	0.209948	0.429562
ENSG00000198034.11	chrX	-	2	1.59304	0.21028	0.429781
ENSG00000069667.16	chr15	-	2	1.58787	0.211016	0.430529
ENSG00000166483.12	chr11	+	2	1.58731	0.211097	0.430529
ENSG00000158435.8	chr2	+	2	1.58351	0.211637	0.43117
ENSG00000132405.19	chr4	+	2	1.58174	0.21189	0.431227
ENSG00000008324.12	chr3	+	2	1.57788	0.212443	0.431893
ENSG00000169519.21	chr11	+	2	1.56698	0.214016	0.434627
ENSG00000076770.14	chrX	-	2	1.56239	0.214682	0.435241
ENSG00000286054.1	chr21	+	2	1.56026	0.214994	0.435241
ENSG00000106018.14	chr7	-	2	1.55958	0.215091	0.435241
ENSG00000110077.14	chr11	-	2	1.55864	0.215229	0.435241
ENSG00000274750.2	chr6	+	2	1.55697	0.215472	0.435272
ENSG00000130779.22	chr12	-	2	1.55376	0.215942	0.43576
ENSG00000101040.19	chr20	-	2	1.55125	0.21631	0.436043
ENSG00000115459.18	chr2	+	2	1.54699	0.216937	0.436657
ENSG00000285938.1	chr3	+	2	1.54571	0.217127	0.436657
ENSG00000106617.15	chr7	-	4	1.49689	0.2173	0.436657
ENSG00000142192.21	chr21	-	2	1.53779	0.218296	0.438139
ENSG00000170892.13	chr19	+	2	1.53493	0.218721	0.438139
ENSG00000170634.13	chr2	+	3	1.53833	0.218726	0.438139
ENSG00000068971.14	chr11	+	2	1.532	0.219157	0.438543
ENSG00000132635.17	chr20	-	2	1.52345	0.220437	0.440643
ENSG00000166484.20	chr17	+	2	1.51949	0.221032	0.441371
ENSG00000139117.14	chr12	-	2	1.51624	0.221522	0.441888
ENSG00000104870.13	chr19	+	2	1.51404	0.221855	0.442091
ENSG00000171877.21	chr15	-	2	1.50162	0.223744	0.443759
ENSG00000170142.12	chr3	+	2	1.50159	0.223749	0.443759
ENSG00000072609.18	chr12	-	2	1.50115	0.223815	0.443759
ENSG00000186260.17	chr16	+	3	1.51472	0.223826	0.443759
ENSG00000136848.17	chr9	+	4	1.47268	0.223853	0.443759
ENSG00000172889.16	chr9	+	3	1.51074	0.224698	0.444854
ENSG00000105483.18	chr19	-	2	1.49409	0.224898	0.444854
ENSG00000112541.18	chr6	-	4	1.46814	0.225104	0.444854
ENSG00000171700.14	chr20	-	2	1.47982	0.227108	0.447672
ENSG00000182732.18	chr14	+	2	1.47906	0.227226	0.447672
ENSG00000113758.13	chr5	-	2	1.47901	0.227233	0.447672
ENSG00000100813.14	chr14	-	2	1.47554	0.227775	0.448277
ENSG00000064932.16	chr19	-	3	1.49277	0.22868	0.449237
ENSG00000205581.11	chr21	-	2	1.46787	0.228977	0.449237
ENSG00000130529.16	chr19	+	2	1.46734	0.229061	0.449237
ENSG00000100201.23	chr22	-	2	1.4663	0.229224	0.449237
ENSG00000115159.16	chr2	+	2	1.46494	0.229438	0.449237
ENSG00000117298.16	chr1	-	3	1.48783	0.229784	0.449455
ENSG00000124588.22	chr6	+	2	1.46032	0.230169	0.449576
ENSG00000196465.10	chr12	+	2	1.45938	0.230317	0.449576
ENSG00000142156.15	chr21	+	2	1.45516	0.230986	0.449862
ENSG00000125107.19	chr16	-	2	1.45402	0.231167	0.449862
ENSG00000167291.16	chr17	-	2	1.4526	0.231394	0.449862
ENSG00000125398.8	chr17	+	2	1.45253	0.231405	0.449862
ENSG00000120742.11	chr3	-	2	1.44925	0.231928	0.450422
ENSG00000159403.18	chr12	-	2	1.44721	0.232256	0.4506
ENSG00000188522.15	chr17	-	2	1.44432	0.232765	0.451031
ENSG00000159069.14	chr9	-	2	1.44255	0.233002	0.451031
ENSG00000099341.12	chr19	+	2	1.44057	0.233319	0.451031
ENSG00000105711.13	chr19	+	2	1.43995	0.233422	0.451031
ENSG00000197182.14	chr22	+	3	1.46829	0.234214	0.451795
ENSG00000138735.16	chr4	-	2	1.43455	0.234291	0.451795
ENSG00000005022.6	chrX	+	2	1.43195	0.234712	0.45187
ENSG00000136699.20	chr2	-	2	1.43139	0.234802	0.45187
ENSG00000055118.16	chr7	-	2	1.42946	0.235117	0.45202
ENSG00000168675.19	chr18	+	5	1.39706	0.236188	0.453339
ENSG00000149823.9	chr11	+	2	1.42233	0.236277	0.453339
ENSG00000070961.16	chr12	-	2	1.41689	0.237168	0.453987
ENSG00000134371.14	chr1	+	2	1.416	0.237314	0.453987
ENSG00000046653.15	chrX	-	2	1.41514	0.237456	0.453987
ENSG00000164849.10	chr7	+	2	1.41447	0.237565	0.453987
ENSG00000077092.19	chr3	+	2	1.41274	0.237851	0.454079
ENSG00000162734.13	chr1	+	2	1.40926	0.238425	0.454721
ENSG00000144366.16	chr2	+	2	1.40687	0.23882	0.45502
ENSG00000156110.15	chr10	+	2	1.40406	0.239286	0.45514
ENSG00000127914.19	chr7	+	2	1.40153	0.239706	0.45514
ENSG00000161642.18	chr12	-	2	1.40131	0.239761	0.45514
ENSG00000144711.16	chr3	-	3	1.44402	0.239835	0.45514
ENSG00000204580.13	chr6	+	2	1.39538	0.240732	0.456164
ENSG00000126457.22	chr19	+	3	1.43969	0.240853	0.456164
ENSG00000078304.19	chr14	+	3	1.4384	0.241158	0.456181
ENSG00000131018.24	chr6	-	4	1.41122	0.241339	0.456181
ENSG00000092969.12	chr1	+	2	1.38579	0.242389	0.457713
ENSG00000179604.10	chr17	-	2	1.37991	0.243335	0.458671
ENSG00000165929.13	chr14	-	2	1.37858	0.243562	0.458671
ENSG00000119707.14	chr14	+	2	1.37748	0.243748	0.458671
ENSG00000182177.14	chr2	-	2	1.37684	0.243856	0.458671
ENSG00000158158.12	chr2	+	2	1.3725	0.244596	0.458905
ENSG00000075651.16	chr3	-	2	1.37226	0.244637	0.458905
ENSG00000136167.15	chr13	-	2	1.37188	0.244701	0.458905
ENSG00000119699.8	chr14	-	2	1.36165	0.246456	0.461672
ENSG00000134504.14	chr18	-	2	1.35871	0.246961	0.461672
ENSG00000178096.9	chr1	+	2	1.35848	0.247	0.461672
ENSG00000093144.19	chr6	-	2	1.35766	0.247143	0.461672
ENSG00000175832.13	chr17	-	2	1.34879	0.248681	0.463848
ENSG00000135404.12	chr12	-	4	1.38626	0.248793	0.463848
ENSG00000114439.19	chr3	+	2	1.34212	0.249844	0.465353
ENSG00000010818.10	chr6	-	2	1.34008	0.25026	0.465674
ENSG00000198393.8	chr12	+	2	1.33754	0.250648	0.465878
ENSG00000198276.16	chr20	-	2	1.33635	0.250858	0.465878
ENSG00000101665.9	chr18	-	2	1.33142	0.251728	0.46704
ENSG00000158321.18	chr7	+	3	1.39049	0.252727	0.46844
ENSG00000106070.20	chr7	-	2	1.31688	0.254312	0.470669
ENSG00000106034.18	chr7	+	2	1.31627	0.254422	0.470669
ENSG00000139687.16	chr13	+	2	1.31229	0.255136	0.471532
ENSG00000102125.16	chrX	+	2	1.30811	0.255889	0.472277
ENSG00000171714.12	chr11	+	2	1.30688	0.25611	0.472277
ENSG00000182796.14	chr12	+	2	1.30594	0.25628	0.472277
ENSG00000187954.13	chr8	-	2	1.30338	0.256742	0.472673
ENSG00000147255.19	chrX	-	2	1.29822	0.257682	0.473849
ENSG00000174282.12	chr17	-	2	1.29622	0.258046	0.473849
ENSG00000140830.9	chr16	-	2	1.29578	0.258125	0.473849
ENSG00000198105.16	chr10	-	2	1.2917	0.25887	0.47476
ENSG00000171914.16	chr15	+	2	1.29027	0.259132	0.474785
ENSG00000120549.18	chr10	+	2	1.2837	0.260339	0.476195
ENSG00000131981.16	chr14	+	3	1.35994	0.2604	0.476195
ENSG00000113448.19	chr5	-	2	1.27706	0.261567	0.477635
ENSG00000116044.16	chr2	-	2	1.27641	0.261687	0.477635
ENSG00000051523.11	chr16	-	2	1.2716	0.262581	0.478809
ENSG00000162591.16	chr1	-	2	1.26775	0.263301	0.479664
ENSG00000082641.16	chr17	+	3	1.34485	0.264274	0.480979
ENSG00000147065.17	chrX	+	2	1.25661	0.265394	0.482558
ENSG00000186352.9	chr4	+	2	1.25069	0.266521	0.484146
ENSG00000101997.13	chrX	+	2	1.24918	0.266799	0.484191
ENSG00000132329.11	chr2	+	2	1.24686	0.267241	0.484533
ENSG00000101752.12	chr18	+	3	1.33177	0.267682	0.484709
ENSG00000067208.14	chr1	-	2	1.24369	0.267845	0.484709
ENSG00000118596.12	chr12	+	2	1.23607	0.269308	0.486895
ENSG00000092931.11	chr17	+	2	1.23434	0.26964	0.487005
ENSG00000032444.17	chr19	+	2	1.2331	0.269879	0.487005
ENSG00000267082.1	chr19	+	2	1.22914	0.270643	0.487924
ENSG00000068383.19	chr10	+	2	1.22578	0.271295	0.488163
ENSG00000086666.19	chr15	+	2	1.22488	0.27147	0.488163
ENSG00000130985.17	chrX	+	2	1.2244	0.271562	0.488163
ENSG00000103034.14	chr16	+	4	1.3134	0.271798	0.488163
ENSG00000175274.19	chr11	-	2	1.21798	0.272815	0.48953
ENSG00000059691.12	chr4	-	3	1.30978	0.273511	0.490319
ENSG00000111846.19	chr6	+	3	1.30858	0.273834	0.490437
ENSG00000066136.20	chr1	+	2	1.20951	0.274476	0.491085
ENSG00000255248.9	chr11	-	3	1.30534	0.27471	0.491085
ENSG00000175538.11	chr11	-	2	1.20471	0.275423	0.491901
ENSG00000114738.11	chr3	+	2	1.19643	0.277069	0.494278
ENSG00000119383.21	chr9	+	3	1.29584	0.277272	0.494278
ENSG00000075914.13	chr3	+	2	1.19341	0.277673	0.494532
ENSG00000120899.18	chr8	+	2	1.19061	0.278232	0.494761
ENSG00000151914.21	chr6	-	6	1.2671	0.27871	0.494761
ENSG00000116754.13	chr1	+	2	1.18639	0.279079	0.494761
ENSG00000072682.20	chr5	-	2	1.18563	0.279233	0.494761
ENSG00000168575.10	chr8	-	2	1.18509	0.279343	0.494761
ENSG00000105607.13	chr19	+	2	1.18457	0.279446	0.494761
ENSG00000043143.21	chr5	+	3	1.28726	0.279614	0.494761
ENSG00000163605.15	chr3	+	3	1.28581	0.28001	0.495004
ENSG00000185825.17	chrX	-	2	1.17677	0.281024	0.496133
ENSG00000198695.2	chrM	-	2	1.1763	0.281168	0.496133
ENSG00000182154.8	chr9	+	2	1.17037	0.282329	0.497722
ENSG00000119335.17	chr9	+	2	1.16755	0.282905	0.498119
ENSG00000182534.13	chr17	-	3	1.27471	0.283076	0.498119
ENSG00000282221.1	chr1	+	2	1.16321	0.283794	0.498864
ENSG00000168646.13	chr17	-	2	1.16203	0.284038	0.498864
ENSG00000076864.19	chr1	-	2	1.16084	0.284282	0.498864
ENSG00000105438.9	chr19	-	2	1.1506	0.286402	0.502027
ENSG00000198853.12	chr9	+	2	1.14841	0.28686	0.502027
ENSG00000187778.14	chr12	-	2	1.14835	0.286872	0.502027
ENSG00000108984.15	chr17	+	2	1.14174	0.288253	0.503982
ENSG00000151474.23	chr10	-	2	1.13605	0.28945	0.505342
ENSG00000020577.14	chr14	+	5	1.25331	0.289641	0.505342
ENSG00000004478.8	chr12	+	2	1.13378	0.289931	0.505342
ENSG00000153310.19	chr8	-	2	1.13303	0.290089	0.505342
ENSG00000101160.15	chr20	-	3	1.24468	0.291533	0.507395
ENSG00000153815.17	chr16	+	2	1.12341	0.292133	0.507941
ENSG00000110811.20	chr12	+	2	1.12226	0.292378	0.507941
ENSG00000272288.6	chr6	+	2	1.11877	0.293124	0.508774
ENSG00000089157.16	chr12	-	2	1.11716	0.29347	0.508852
ENSG00000213160.10	chr2	+	2	1.1157	0.293784	0.508852
ENSG00000188677.15	chr22	+	2	1.11484	0.293968	0.508852
ENSG00000079432.8	chr19	+	2	1.10531	0.296028	0.511954
ENSG00000092098.17	chr14	+	2	1.10305	0.29652	0.512341
ENSG00000120729.10	chr5	+	2	1.10111	0.296995	0.512473
ENSG00000010803.16	chr1	-	2	1.0992	0.297358	0.512473
ENSG00000168283.14	chr10	+	2	1.09901	0.297401	0.512473
ENSG00000023171.18	chr11	+	3	1.22306	0.297781	0.512666
ENSG00000122643.22	chr7	-	2	1.09373	0.298556	0.512914
ENSG00000139842.15	chr13	+	2	1.09365	0.298574	0.512914
ENSG00000100354.21	chr22	+	2	1.09157	0.29903	0.512914
ENSG00000113312.11	chr5	+	2	1.09106	0.299144	0.512914
ENSG00000219607.4	chr6	+	2	1.0905	0.299267	0.512914
ENSG00000015153.15	chr12	-	2	1.08246	0.301043	0.515299
ENSG00000155324.10	chr5	+	2	1.08176	0.301198	0.515299
ENSG00000110446.12	chr11	-	2	1.06886	0.304082	0.519768
ENSG00000114541.15	chr3	-	5	1.21645	0.304914	0.520724
ENSG00000093183.14	chr3	-	2	1.05934	0.306231	0.522506
ENSG00000158352.17	chrX	-	2	1.05729	0.306696	0.522833
ENSG00000156650.14	chr10	+	2	1.05597	0.306997	0.52288
ENSG00000240583.14	chr7	+	3	1.18909	0.307876	0.523911
ENSG00000105227.16	chr19	-	2	1.04855	0.308693	0.524801
ENSG00000160392.13	chr19	-	2	1.04669	0.30912	0.524801
ENSG00000106025.9	chr7	-	2	1.04487	0.30954	0.524801
ENSG00000079102.16	chr8	-	2	1.04416	0.309702	0.524801
ENSG00000180628.15	chr10	+	2	1.04385	0.309773	0.524801
ENSG00000127946.17	chr7	-	2	1.03561	0.311679	0.526773
ENSG00000011454.18	chr9	+	2	1.03465	0.311902	0.526773
ENSG00000130822.16	chrX	-	2	1.03437	0.311968	0.526773
ENSG00000135905.20	chr2	-	2	1.03406	0.312039	0.526773
ENSG00000116584.20	chr1	-	2	1.03209	0.312497	0.52708
ENSG00000163947.12	chr3	-	3	1.17167	0.313184	0.527773
ENSG00000182979.18	chr14	+	3	1.17069	0.313488	0.527819
ENSG00000170473.17	chr12	-	2	1.02271	0.314694	0.528764
ENSG00000172757.13	chr11	-	2	1.02193	0.314878	0.528764
ENSG00000109452.12	chr4	-	2	1.02192	0.314879	0.528764
ENSG00000111961.18	chr6	+	3	1.16401	0.315549	0.529423
ENSG00000166068.13	chr15	+	2	1.01156	0.317331	0.531946
ENSG00000148339.12	chr9	+	2	1.00921	0.317893	0.532422
ENSG00000129116.19	chr4	+	3	1.15484	0.318405	0.532648
ENSG00000132153.15	chr3	+	2	1.0063	0.318585	0.532648
ENSG00000005302.19	chrX	+	2	1.00411	0.319109	0.533057
ENSG00000124380.11	chr2	+	2	0.998773	0.320391	0.534732
ENSG00000235927.4	chr1	-	2	0.995199	0.321254	0.535602
ENSG00000130054.5	chrX	+	2	0.994291	0.321473	0.535602
ENSG00000120885.22	chr8	-	2	0.987171	0.323202	0.53775
ENSG00000121057.13	chr17	+	2	0.986576	0.323347	0.53775
ENSG00000131089.17	chrX	-	3	1.138	0.323714	0.53775
ENSG00000266094.8	chr1	+	2	0.98436	0.323888	0.53775
ENSG00000175182.15	chr3	+	2	0.976076	0.325921	0.540656
ENSG00000173372.17	chr1	+	2	0.97326	0.326623	0.540986
ENSG00000003402.20	chr2	+	4	1.15979	0.326798	0.540986
ENSG00000242125.3	chr1	+	2	0.970675	0.327256	0.540986
ENSG00000049618.24	chr6	+	2	0.969543	0.327537	0.540986
ENSG00000070831.17	chr1	+	2	0.969136	0.327638	0.540986
ENSG00000186184.19	chr13	+	2	0.968407	0.327819	0.540986
ENSG00000143702.16	chr1	-	2	0.96029	0.329843	0.543857
ENSG00000104205.16	chr8	+	2	0.956629	0.330762	0.544901
ENSG00000147403.18	chrX	+	2	0.951334	0.332096	0.546392
ENSG00000140545.15	chr15	-	2	0.949937	0.332451	0.546392
ENSG00000137486.17	chr11	-	2	0.949641	0.332524	0.546392
ENSG00000160808.11	chr3	-	2	0.947438	0.333132	0.54692
ENSG00000166272.18	chr10	+	2	0.944808	0.333751	0.547038
ENSG00000152894.15	chr6	-	2	0.944709	0.333776	0.547038
ENSG00000153250.20	chr2	-	3	1.10339	0.334914	0.548432
ENSG00000131788.16	chr1	-	2	0.937856	0.335526	0.548965
ENSG00000180879.14	chrX	+	2	0.936145	0.335965	0.549212
ENSG00000214530.10	chr11	-	2	0.933655	0.336605	0.549788
ENSG00000149091.15	chr11	+	4	1.13295	0.33738	0.550583
ENSG00000126777.18	chr14	+	3	1.09367	0.33813	0.551336
ENSG00000159131.17	chr21	-	2	0.925206	0.338789	0.551941
ENSG00000231607.13	chr13	-	2	0.920153	0.340105	0.553612
ENSG00000251247.11	chr19	+	2	0.9094	0.342928	0.557731
ENSG00000136160.17	chr13	-	2	0.908171	0.343252	0.557785
ENSG00000117114.20	chr1	+	3	1.07632	0.343944	0.558434
ENSG00000171444.18	chr5	-	3	1.07395	0.344748	0.559156
ENSG00000163520.14	chr3	+	2	0.90168	0.344974	0.559156
ENSG00000117528.14	chr1	+	2	0.894165	0.346982	0.561607
ENSG00000184840.12	chr5	+	2	0.893822	0.347073	0.561607
ENSG00000075711.21	chr3	-	2	0.890564	0.347951	0.56255
ENSG00000076944.16	chr19	+	2	0.886944	0.348928	0.563652
ENSG00000178031.18	chr9	+	2	0.885054	0.349437	0.563999
ENSG00000109016.17	chr17	+	2	0.882694	0.350078	0.564264
ENSG00000097007.19	chr9	+	2	0.882277	0.350192	0.564264
ENSG00000141562.18	chr17	+	2	0.879676	0.350898	0.564926
ENSG00000146592.17	chr7	+	2	0.8773	0.351548	0.565342
ENSG00000100412.17	chr22	+	2	0.87656	0.351749	0.565342
ENSG00000156299.13	chr21	-	2	0.872968	0.352732	0.566447
ENSG00000116128.11	chr1	+	2	0.869341	0.353729	0.566958
ENSG00000108823.16	chr17	+	2	0.868908	0.353849	0.566958
ENSG00000153487.13	chr13	+	2	0.868575	0.353941	0.566958
ENSG00000164850.15	chr7	+	2	0.865939	0.354668	0.567647
ENSG00000088992.18	chr12	-	2	0.86367	0.355298	0.567732
ENSG00000073417.15	chr15	+	2	0.863508	0.355341	0.567732
ENSG00000240771.8	chr12	+	2	0.86253	0.355613	0.567732
ENSG00000178104.19	chr1	+	3	1.03924	0.356757	0.569083
ENSG00000168385.18	chr2	+	2	0.854748	0.357781	0.570241
ENSG00000137168.8	chr6	-	2	0.849673	0.359205	0.572034
ENSG00000130255.13	chr19	+	2	0.84415	0.360765	0.573711
ENSG00000170485.17	chr2	+	2	0.843816	0.360859	0.573711
ENSG00000265107.3	chr1	-	2	0.842076	0.361398	0.574035
ENSG00000126456.16	chr19	-	2	0.839875	0.361977	0.574035
ENSG00000176209.12	chr8	+	2	0.838437	0.362386	0.574035
ENSG00000065978.19	chr1	+	2	0.838355	0.36241	0.574035
ENSG00000102781.14	chr13	-	2	0.837813	0.362564	0.574035
ENSG00000184347.15	chr5	-	2	0.835244	0.363299	0.574293
ENSG00000167978.17	chr16	+	4	1.07016	0.363328	0.574293
ENSG00000105576.15	chr19	-	3	1.01677	0.364695	0.575903
ENSG00000138964.17	chr22	+	2	0.829146	0.365047	0.575903
ENSG00000160408.15	chr9	-	2	0.828438	0.365251	0.575903
ENSG00000152242.11	chr18	+	2	0.82617	0.365905	0.576035
ENSG00000078246.17	chr12	+	2	0.826057	0.365937	0.576035
ENSG00000149557.14	chr11	-	4	1.05934	0.367973	0.578762
ENSG00000071242.12	chr6	-	2	0.816619	0.368677	0.579211
ENSG00000270647.6	chr17	+	2	0.815976	0.368865	0.579211
ENSG00000128487.18	chr17	+	2	0.813126	0.369698	0.579818
ENSG00000177606.8	chr1	-	2	0.812735	0.369858	0.579818
ENSG00000092929.12	chr17	-	2	0.808292	0.37112	0.58106
ENSG00000060237.19	chr12	+	2	0.807467	0.371361	0.58106
ENSG00000022840.16	chr12	+	3	0.997821	0.371562	0.58106
ENSG00000108306.13	chr17	-	2	0.805604	0.371911	0.58113
ENSG00000123815.13	chr19	-	4	1.04943	0.372271	0.581217
ENSG00000137831.15	chr15	-	2	0.802202	0.372918	0.581562
ENSG00000103495.14	chr16	+	2	0.801271	0.373194	0.581562
ENSG00000108924.14	chr17	+	3	0.992797	0.373405	0.581562
ENSG00000176834.14	chr12	-	2	0.797497	0.374317	0.582508
ENSG00000172159.16	chr9	-	2	0.79618	0.37471	0.582645
ENSG00000137936.18	chr1	-	2	0.785752	0.377842	0.586701
ENSG00000173264.15	chr11	+	2	0.785453	0.377933	0.586701
ENSG00000012171.20	chr3	+	2	0.783341	0.378573	0.586916
ENSG00000130158.14	chr19	-	2	0.782967	0.378685	0.586916
ENSG00000082293.13	chr6	+	2	0.778085	0.380169	0.588675
ENSG00000110492.16	chr11	+	2	0.777207	0.380437	0.588675
ENSG00000121933.19	chr1	-	3	0.97275	0.38085	0.588838
ENSG00000101333.18	chr20	+	2	0.770992	0.382341	0.5905
ENSG00000079308.19	chr2	-	9	1.07124	0.382543	0.5905
ENSG00000198160.15	chr1	+	2	0.763711	0.384586	0.59245
ENSG00000140650.12	chr16	+	2	0.763491	0.384654	0.59245
ENSG00000077009.13	chr19	+	3	0.962313	0.384785	0.59245
ENSG00000117595.12	chr1	-	2	0.762233	0.385046	0.59245
ENSG00000163694.15	chr4	-	2	0.759252	0.385971	0.593396
ENSG00000047315.17	chr4	+	2	0.756338	0.386881	0.594316
ENSG00000107897.20	chr10	-	2	0.747763	0.389574	0.597973
ENSG00000169946.14	chr8	+	2	0.745646	0.390243	0.59848
ENSG00000173120.15	chr11	+	2	0.744085	0.390737	0.59848
ENSG00000167074.15	chr22	+	2	0.743749	0.390844	0.59848
ENSG00000152217.20	chr18	+	2	0.742716	0.391172	0.598502
ENSG00000081870.12	chr1	-	2	0.740791	0.391784	0.598519
ENSG00000149269.10	chr11	-	2	0.740025	0.392028	0.598519
ENSG00000165671.21	chr5	+	2	0.739727	0.392123	0.598519
ENSG00000149591.17	chr11	+	2	0.738114	0.39268	0.598892
ENSG00000169764.16	chr2	+	3	0.938612	0.393875	0.600235
ENSG00000143740.15	chr1	+	3	0.936404	0.394733	0.600852
ENSG00000205542.11	chrX	+	2	0.731033	0.394909	0.600852
ENSG00000163171.8	chr2	-	2	0.728989	0.395566	0.601338
ENSG00000050405.13	chr12	-	2	0.728056	0.395868	0.601338
ENSG00000121281.13	chr16	+	3	0.932559	0.396231	0.601338
ENSG00000104635.15	chr8	+	2	0.725467	0.396705	0.601338
ENSG00000250722.6	chr5	-	2	0.724904	0.396888	0.601338
ENSG00000137764.20	chr15	+	2	0.7242	0.397116	0.601338
ENSG00000135090.14	chr12	-	2	0.72284	0.397558	0.601531
ENSG00000040341.18	chr8	-	2	0.717479	0.399306	0.603698
ENSG00000182606.17	chr3	+	2	0.714494	0.400285	0.604699
ENSG00000038382.20	chr5	+	3	0.919125	0.401514	0.606076
ENSG00000168556.7	chr4	+	2	0.705519	0.403248	0.607831
ENSG00000196914.9	chr11	+	2	0.705325	0.403312	0.607831
ENSG00000179583.20	chr16	+	4	0.979405	0.403917	0.608262
ENSG00000026025.16	chr10	+	3	0.907423	0.406172	0.610902
ENSG00000091436.17	chr2	+	3	0.906741	0.406444	0.610902
ENSG00000108654.16	chr17	-	4	0.973304	0.40678	0.610902
ENSG00000116171.19	chr1	+	2	0.69358	0.40724	0.610902
ENSG00000166313.19	chr11	-	2	0.693496	0.407268	0.610902
ENSG00000145390.11	chr4	+	2	0.691464	0.407953	0.61145
ENSG00000065427.15	chr16	-	2	0.689971	0.408458	0.611727
ENSG00000143344.16	chr1	+	2	0.683243	0.410743	0.614668
ENSG00000167701.14	chr8	+	2	0.681843	0.411223	0.614903
ENSG00000123154.12	chr19	+	3	0.893478	0.411794	0.615277
ENSG00000152082.15	chr2	+	2	0.67567	0.413339	0.617102
ENSG00000146540.15	chr7	-	3	0.885451	0.415067	0.619198
ENSG00000198722.14	chr9	+	2	0.668993	0.415647	0.619413
ENSG00000163697.17	chr4	-	3	0.881824	0.416554	0.619413
ENSG00000164116.17	chr4	+	2	0.666186	0.416624	0.619413
ENSG00000165410.15	chr14	-	2	0.665295	0.416935	0.619413
ENSG00000134369.15	chr1	+	2	0.665184	0.416973	0.619413
ENSG00000062716.13	chr17	+	2	0.66476	0.417156	0.619413
ENSG00000124772.12	chr6	-	3	0.878644	0.417863	0.619924
ENSG00000126461.15	chr19	+	2	0.661085	0.418408	0.619924
ENSG00000108219.15	chr10	+	2	0.660415	0.418642	0.619924
ENSG00000171604.12	chr5	+	2	0.65997	0.418798	0.619924
ENSG00000203485.14	chr14	+	2	0.657536	0.419654	0.62071
ENSG00000197111.16	chr12	+	3	0.873177	0.420123	0.620924
ENSG00000140350.15	chr15	-	2	0.649693	0.42243	0.623851
ENSG00000197565.16	chrX	-	2	0.641669	0.425299	0.627603
ENSG00000101608.13	chr18	+	2	0.637854	0.426713	0.629204
ENSG00000031003.10	chr5	-	2	0.636059	0.427324	0.629495
ENSG00000073711.11	chr3	+	2	0.635378	0.427569	0.629495
ENSG00000189308.11	chr4	-	2	0.633706	0.428175	0.629902
ENSG00000126217.21	chr13	+	2	0.632764	0.428518	0.629921
ENSG00000127838.14	chr2	+	3	0.851311	0.429283	0.630562
ENSG00000151276.23	chr3	-	2	0.62757	0.430412	0.631734
ENSG00000185532.20	chr10	+	2	0.624633	0.431489	0.632829
ENSG00000198218.11	chr3	-	2	0.623585	0.431875	0.632908
ENSG00000138639.18	chr4	+	2	0.62235	0.432329	0.632983
ENSG00000236404.10	chr9	-	3	0.842834	0.432889	0.632983
ENSG00000105993.15	chr7	+	2	0.62075	0.43292	0.632983
ENSG00000127863.16	chr13	+	2	0.611589	0.436323	0.637471
ENSG00000148219.18	chr9	-	2	0.605441	0.438645	0.640011
ENSG00000084070.12	chr1	+	2	0.605085	0.438764	0.640011
ENSG00000139323.14	chr12	-	2	0.603263	0.439452	0.640011
ENSG00000104805.16	chr19	+	3	0.827111	0.439659	0.640011
ENSG00000105647.19	chr19	+	3	0.826661	0.439855	0.640011
ENSG00000173960.14	chr2	+	2	0.601365	0.44017	0.640011
ENSG00000226688.7	chr10	-	2	0.600744	0.440405	0.640011
ENSG00000185650.10	chr14	-	2	0.598195	0.441373	0.64093
ENSG00000134201.12	chr1	+	2	0.597199	0.441753	0.640994
ENSG00000160753.16	chr1	+	2	0.594433	0.442808	0.642038
ENSG00000113575.10	chr5	-	2	0.584932	0.446464	0.646849
ENSG00000196405.13	chr14	+	3	0.808323	0.44789	0.648203
ENSG00000129521.15	chr14	-	2	0.580076	0.448352	0.648203
ENSG00000162670.11	chr1	-	2	0.579908	0.448417	0.648203
ENSG00000116857.17	chr1	-	2	0.578403	0.449004	0.648562
ENSG00000248923.1	chr5	-	2	0.575125	0.450325	0.649979
ENSG00000164830.19	chr8	+	3	0.800943	0.451166	0.650489
ENSG00000132646.11	chr20	-	2	0.572401	0.451359	0.650489
ENSG00000186815.13	chr12	+	2	0.565696	0.454014	0.653821
ENSG00000125834.13	chr20	+	2	0.564534	0.454476	0.653993
ENSG00000167815.12	chr19	-	2	0.561999	0.455487	0.654956
ENSG00000136261.15	chr7	+	2	0.557582	0.457259	0.656816
ENSG00000143554.14	chr1	+	2	0.556273	0.457785	0.656816
ENSG00000109686.19	chr4	-	3	0.786137	0.457812	0.656816
ENSG00000100897.18	chr14	+	2	0.552208	0.459428	0.658566
ENSG00000182667.14	chr11	+	2	0.551484	0.459721	0.658566
ENSG00000140199.13	chr15	-	2	0.548871	0.460783	0.659593
ENSG00000275915.1	chr1	+	2	0.545659	0.462095	0.660976
ENSG00000096696.14	chr6	+	2	0.544075	0.462742	0.661407
ENSG00000123562.18	chrX	-	2	0.542646	0.463329	0.66175
ENSG00000182175.14	chr15	-	2	0.540964	0.46402	0.661899
ENSG00000134243.12	chr1	-	3	0.772272	0.464126	0.661899
ENSG00000133315.12	chr11	-	2	0.539314	0.4647	0.662224
ENSG00000145012.13	chr3	+	3	0.769378	0.465456	0.662806
ENSG00000167106.12	chr9	-	3	0.761595	0.469048	0.666878
ENSG00000123600.20	chr2	-	2	0.527589	0.46958	0.666878
ENSG00000167797.8	chr11	-	2	0.527356	0.469678	0.666878
ENSG00000133678.14	chr10	+	2	0.527279	0.469711	0.666878
ENSG00000118900.15	chr16	+	2	0.525736	0.470359	0.667302
ENSG00000172845.17	chr2	-	3	0.754822	0.472197	0.669413
ENSG00000269113.4	chr1	-	2	0.516173	0.474412	0.672055
ENSG00000166508.18	chr7	-	2	0.513954	0.475361	0.6729
ENSG00000113645.15	chr5	+	2	0.512554	0.475961	0.673251
ENSG00000102265.12	chrX	+	3	0.745815	0.476421	0.673272
ENSG00000204954.10	chr12	-	2	0.510879	0.476681	0.673272
ENSG00000197461.13	chr7	-	2	0.508427	0.477737	0.674266
ENSG00000188257.12	chr1	-	2	0.507117	0.478338	0.674615
ENSG00000185088.14	chr15	-	2	0.504905	0.479262	0.674992
ENSG00000189171.14	chr1	-	2	0.501705	0.480654	0.674992
ENSG00000167994.13	chr11	-	2	0.501423	0.480777	0.674992
ENSG00000106608.17	chr7	-	2	0.501393	0.48079	0.674992
ENSG00000162909.18	chr1	+	2	0.500452	0.481201	0.674992
ENSG00000053254.16	chr14	-	3	0.735708	0.481203	0.674992
ENSG00000088899.15	chr20	-	2	0.499908	0.481438	0.674992
ENSG00000181513.15	chr17	+	2	0.499517	0.481609	0.674992
ENSG00000173848.19	chr10	+	2	0.498739	0.48195	0.674992
ENSG00000036672.16	chr11	-	4	0.824227	0.482225	0.674992
ENSG00000197580.13	chr11	+	2	0.497509	0.48249	0.674992
ENSG00000275131.3	chr1	-	2	0.496167	0.48308	0.675323
ENSG00000196498.13	chr12	-	4	0.819615	0.48473	0.677133
ENSG00000102226.10	chrX	+	2	0.489261	0.486132	0.678596
ENSG00000196352.16	chr1	+	2	0.480592	0.490009	0.683509
ENSG00000165458.14	chr11	+	2	0.477454	0.491426	0.684985
ENSG00000138411.13	chr2	-	2	0.476023	0.492074	0.685389
ENSG00000187091.14	chr3	-	2	0.471933	0.493935	0.687222
ENSG00000159128.15	chr21	+	2	0.471549	0.49411	0.687222
ENSG00000064042.18	chr4	+	3	0.704031	0.496513	0.690063
ENSG00000004059.11	chr7	+	2	0.46456	0.497319	0.690681
ENSG00000245532.9	chr11	+	2	0.456967	0.500878	0.695119
ENSG00000126804.13	chr14	+	2	0.45353	0.502456	0.696803
ENSG00000112183.15	chr6	+	2	0.452157	0.503102	0.697192
ENSG00000185624.16	chr17	-	3	0.688701	0.504099	0.698046
ENSG00000136100.14	chr13	-	2	0.448397	0.504878	0.698046
ENSG00000100364.19	chr22	-	2	0.447924	0.505104	0.698046
ENSG00000112759.19	chr6	+	4	0.78265	0.50518	0.698046
ENSG00000083720.13	chr5	-	2	0.446537	0.505761	0.698047
ENSG00000167522.16	chr16	-	2	0.446222	0.505911	0.698047
ENSG00000160180.16	chr21	-	2	0.445188	0.506404	0.698091
ENSG00000145391.14	chr4	-	2	0.444621	0.506673	0.698091
ENSG00000065320.9	chr17	+	2	0.439855	0.508978	0.700762
ENSG00000230590.11	chrX	-	2	0.435703	0.510955	0.702977
ENSG00000105738.11	chr19	+	2	0.43195	0.512776	0.704654
ENSG00000177628.16	chr1	-	2	0.431369	0.513059	0.704654
ENSG00000109846.9	chr11	-	4	0.768166	0.513374	0.704654
ENSG00000010278.15	chr12	+	2	0.42957	0.513937	0.704654
ENSG00000177200.17	chr16	+	4	0.766434	0.514361	0.704654
ENSG00000168003.18	chr11	+	2	0.428651	0.514386	0.704654
ENSG00000107738.20	chr10	-	2	0.427609	0.514897	0.704848
ENSG00000173638.19	chr21	-	2	0.421263	0.518025	0.708622
ENSG00000166091.21	chr14	+	2	0.418787	0.519254	0.709796
ENSG00000081377.17	chr9	-	2	0.417161	0.520065	0.710396
ENSG00000148053.17	chr9	+	2	0.414708	0.521291	0.711322
ENSG00000139579.13	chr12	+	2	0.414211	0.52154	0.711322
ENSG00000158169.13	chr9	-	2	0.412814	0.522242	0.711322
ENSG00000250159.7	chr5	-	2	0.411411	0.522948	0.711322
ENSG00000128641.19	chr2	+	2	0.411186	0.523061	0.711322
ENSG00000173221.14	chr5	-	2	0.410685	0.523314	0.711322
ENSG00000108679.13	chr17	-	2	0.409919	0.523701	0.711322
ENSG00000141298.19	chr17	-	2	0.40988	0.523721	0.711322
ENSG00000204438.11	chr6	-	2	0.406748	0.525307	0.71297
ENSG00000011451.21	chr19	-	3	0.644087	0.526853	0.714561
ENSG00000174851.16	chr11	-	2	0.401956	0.527776	0.714957
ENSG00000160111.14	chr19	-	2	0.40168	0.527893	0.714957
ENSG00000112576.13	chr6	-	2	0.400375	0.528563	0.715356
ENSG00000126001.16	chr20	+	2	0.398388	0.529585	0.715828
ENSG00000204843.13	chr2	-	3	0.63872	0.52966	0.715828
ENSG00000170290.4	chr11	-	2	0.397277	0.530162	0.716
ENSG00000172354.10	chr7	+	2	0.39645	0.530586	0.716066
ENSG00000204138.13	chr1	+	2	0.389721	0.534087	0.720282
ENSG00000170558.10	chr18	-	2	0.388646	0.534666	0.720555
ENSG00000124313.18	chrX	-	2	0.384591	0.536784	0.722546
ENSG00000012223.13	chr3	-	2	0.384325	0.536925	0.722546
ENSG00000224861.1	chr14	-	2	0.383658	0.537278	0.722546
ENSG00000106823.12	chr9	-	2	0.380189	0.539119	0.724512
ENSG00000172824.16	chr16	+	2	0.376375	0.541157	0.72668
ENSG00000164692.18	chr7	+	5	0.776167	0.541829	0.72668
ENSG00000139160.13	chr12	+	2	0.375042	0.541873	0.72668
ENSG00000184702.20	chr22	+	3	0.61429	0.542629	0.727184
ENSG00000151726.15	chr4	-	3	0.612133	0.54379	0.72823
ENSG00000115649.16	chr2	-	2	0.369858	0.544673	0.728693
ENSG00000169862.19	chr5	-	2	0.369442	0.544899	0.728693
ENSG00000198482.14	chr19	+	2	0.365944	0.546805	0.73073
ENSG00000196507.11	chrX	+	2	0.365127	0.547252	0.730816
ENSG00000160072.20	chr1	+	2	0.364182	0.54777	0.730997
ENSG00000186111.11	chr19	-	2	0.360934	0.549557	0.732871
ENSG00000006194.10	chr16	+	2	0.359343	0.550436	0.733531
ENSG00000198042.11	chr8	+	2	0.356553	0.551985	0.735082
ENSG00000105855.10	chr7	+	2	0.355338	0.552661	0.73547
ENSG00000106348.18	chr7	-	2	0.351696	0.5547	0.73767
ENSG00000171631.16	chr11	+	3	0.589718	0.555999	0.738798
ENSG00000136108.15	chr13	+	2	0.348817	0.556322	0.738798
ENSG00000188554.15	chr17	+	2	0.347228	0.55722	0.739478
ENSG00000151967.18	chr3	+	2	0.342277	0.560039	0.742619
ENSG00000166925.9	chr7	-	2	0.34171	0.560365	0.742619
ENSG00000177565.18	chr3	-	2	0.338961	0.561942	0.743759
ENSG00000118971.9	chr12	+	2	0.338855	0.562003	0.743759
ENSG00000171681.12	chr12	+	2	0.33242	0.565733	0.748177
ENSG00000271952.2	chr2	+	2	0.331728	0.566137	0.748194
ENSG00000165192.14	chrX	-	2	0.33042	0.566903	0.748475
ENSG00000205189.12	chr8	+	2	0.329896	0.567209	0.748475
ENSG00000156381.9	chr14	-	2	0.329357	0.567525	0.748475
ENSG00000138674.17	chr4	-	2	0.327306	0.568732	0.749478
ENSG00000125746.18	chr19	-	2	0.326733	0.56907	0.749478
ENSG00000104904.12	chr19	+	2	0.324591	0.570337	0.75063
ENSG00000184220.12	chr3	+	2	0.32177	0.572014	0.752319
ENSG00000136986.10	chr8	-	2	0.317947	0.574301	0.754807
ENSG00000159267.16	chr21	-	2	0.315036	0.576055	0.756373
ENSG00000213722.10	chr6	-	2	0.314658	0.576284	0.756373
ENSG00000053918.18	chr11	+	2	0.31316	0.577192	0.756426
ENSG00000162512.16	chr1	-	2	0.312953	0.577318	0.756426
ENSG00000105699.17	chr19	+	2	0.312632	0.577512	0.756426
ENSG00000146834.14	chr7	+	2	0.311307	0.578319	0.756965
ENSG00000267107.8	chr19	-	2	0.309903	0.579175	0.757285
ENSG00000168000.15	chr11	-	2	0.309606	0.579357	0.757285
ENSG00000224051.7	chr1	+	2	0.308919	0.579777	0.757317
ENSG00000204590.12	chr6	-	2	0.307397	0.580711	0.758018
ENSG00000167705.12	chr17	-	2	0.301912	0.5841	0.761922
ENSG00000172009.15	chr19	+	2	0.299606	0.585537	0.763276
ENSG00000115935.18	chr2	-	3	0.536373	0.586188	0.763603
ENSG00000166451.14	chr16	+	2	0.292616	0.589937	0.767472
ENSG00000048740.18	chr10	+	3	0.529231	0.590355	0.767472
ENSG00000100888.15	chr14	-	2	0.291945	0.590363	0.767472
ENSG00000148411.8	chr9	-	2	0.289643	0.59183	0.768606
ENSG00000055609.20	chr7	-	2	0.289314	0.59204	0.768606
ENSG00000106992.19	chr9	-	2	0.285079	0.594759	0.771612
ENSG00000135424.18	chr12	-	2	0.283866	0.595544	0.772106
ENSG00000178860.9	chr8	-	2	0.283116	0.596029	0.772211
ENSG00000075785.14	chr3	+	3	0.517113	0.597493	0.773584
ENSG00000127084.19	chr9	+	2	0.279322	0.598498	0.774359
ENSG00000142541.18	chr19	+	2	0.278565	0.598993	0.774477
ENSG00000196576.16	chr22	-	2	0.27773	0.59954	0.774479
ENSG00000145016.16	chr3	-	2	0.277325	0.599806	0.774479
ENSG00000090006.18	chr19	+	3	0.510274	0.60156	0.77622
ENSG00000145990.11	chr6	-	2	0.273189	0.602535	0.776884
ENSG00000144579.8	chr2	+	2	0.272657	0.602888	0.776884
ENSG00000204681.11	chr6	-	2	0.270015	0.604647	0.778626
ENSG00000135636.14	chr2	+	2	0.267074	0.606618	0.780638
ENSG00000196712.18	chr17	+	2	0.265727	0.607526	0.781075
ENSG00000135387.21	chr11	+	2	0.265358	0.607775	0.781075
ENSG00000163798.13	chr2	+	2	0.262037	0.610027	0.783442
ENSG00000144596.13	chr3	-	2	0.2607	0.610939	0.784086
ENSG00000198420.10	chr7	-	2	0.259322	0.611881	0.784556
ENSG00000150593.18	chr10	+	2	0.258964	0.612126	0.784556
ENSG00000181409.14	chr17	-	2	0.254583	0.615147	0.7879
ENSG00000185033.14	chr15	+	2	0.253755	0.615722	0.788108
ENSG00000145743.17	chr5	-	2	0.251452	0.617327	0.789633
ENSG00000164050.13	chr3	-	2	0.249354	0.618796	0.790735
ENSG00000163539.17	chr3	-	3	0.481446	0.619016	0.790735
ENSG00000130299.17	chr19	+	2	0.243618	0.622855	0.794993
ENSG00000164953.16	chr8	+	2	0.241992	0.624016	0.794993
ENSG00000172572.7	chr12	+	2	0.241837	0.624126	0.794993
ENSG00000089693.11	chr12	-	4	0.587037	0.624313	0.794993
ENSG00000177963.14	chr11	+	2	0.241414	0.624429	0.794993
ENSG00000165269.13	chr9	-	2	0.23983	0.625567	0.795912
ENSG00000174197.16	chr15	+	2	0.238882	0.62625	0.79625
ENSG00000068724.17	chr2	+	2	0.237483	0.627261	0.797005
ENSG00000164318.18	chr5	+	2	0.232646	0.630786	0.800807
ENSG00000182963.11	chr17	-	2	0.232229	0.631091	0.800807
ENSG00000170619.10	chr8	-	2	0.23113	0.631899	0.8013
ENSG00000175029.17	chr10	-	2	0.227981	0.634227	0.803719
ENSG00000133619.17	chr7	+	2	0.227158	0.63484	0.803962
ENSG00000136950.13	chr9	+	2	0.226437	0.635377	0.804109
ENSG00000110429.14	chr11	-	2	0.225838	0.635824	0.804142
ENSG00000172765.17	chr3	-	2	0.225153	0.636335	0.804257
ENSG00000170638.10	chr22	+	2	0.223067	0.637901	0.805703
ENSG00000109171.15	chr4	+	2	0.22241	0.638395	0.805795
ENSG00000088808.18	chr14	-	2	0.219043	0.640946	0.807981
ENSG00000116774.12	chr1	+	2	0.21877	0.641153	0.807981
ENSG00000237773.7	chr7	-	2	0.218452	0.641396	0.807981
ENSG00000130940.15	chr1	-	2	0.216637	0.642783	0.808253
ENSG00000059145.19	chr16	-	2	0.21649	0.642895	0.808253
ENSG00000109099.16	chr17	-	4	0.5574	0.643883	0.808253
ENSG00000048540.15	chr12	-	2	0.215198	0.643887	0.808253
ENSG00000074181.9	chr19	-	2	0.214936	0.64409	0.808253
ENSG00000113594.10	chr5	-	2	0.214857	0.64415	0.808253
ENSG00000185437.14	chr21	+	3	0.438841	0.645761	0.808656
ENSG00000181830.9	chr11	+	2	0.212613	0.645883	0.808656
ENSG00000247596.10	chr3	-	2	0.211632	0.646645	0.808656
ENSG00000084093.19	chr4	+	2	0.211012	0.647126	0.808656
ENSG00000104490.18	chr8	-	2	0.21065	0.647408	0.808656
ENSG00000144935.15	chr3	+	2	0.210061	0.647867	0.808656
ENSG00000171492.14	chr1	+	2	0.209689	0.648158	0.808656
ENSG00000135821.19	chr1	-	2	0.209364	0.648412	0.808656
ENSG00000135778.12	chr1	+	2	0.209027	0.648676	0.808656
ENSG00000162599.17	chr1	+	2	0.208993	0.648702	0.808656
ENSG00000170421.12	chr12	-	2	0.208127	0.649381	0.808975
ENSG00000122786.20	chr7	+	4	0.545656	0.651739	0.811383
ENSG00000130695.16	chr1	+	2	0.204531	0.652219	0.811452
ENSG00000177380.14	chr19	+	2	0.203211	0.653268	0.812229
ENSG00000197063.11	chr17	-	2	0.201976	0.654253	0.812924
ENSG00000164713.10	chr7	+	3	0.424495	0.655027	0.813214
ENSG00000187239.17	chr9	-	2	0.200623	0.655337	0.813214
ENSG00000228794.10	chr1	+	2	0.199609	0.656152	0.813697
ENSG00000243156.9	chr22	-	2	0.197084	0.658192	0.815695
ENSG00000204520.14	chr6	+	2	0.196561	0.658617	0.815695
ENSG00000080709.16	chr5	+	2	0.193754	0.660908	0.818002
ENSG00000274104.1	chr19	-	2	0.19216	0.662216	0.819091
ENSG00000074266.22	chr11	+	2	0.191103	0.663088	0.819328
ENSG00000150401.15	chr13	-	2	0.190623	0.663485	0.819328
ENSG00000150527.17	chr14	+	2	0.190371	0.663694	0.819328
ENSG00000100605.17	chr14	-	2	0.189617	0.664319	0.81957
ENSG00000154305.18	chr1	+	2	0.188644	0.665127	0.820038
ENSG00000107771.17	chr10	+	2	0.183541	0.669411	0.824787
ENSG00000179833.4	chr2	-	2	0.180779	0.671759	0.827146
ENSG00000122550.18	chr7	+	2	0.180178	0.672273	0.827146
ENSG00000112837.17	chr6	-	2	0.179385	0.672952	0.827146
ENSG00000173928.4	chr19	+	2	0.179263	0.673057	0.827146
ENSG00000166398.14	chr19	+	2	0.177906	0.674224	0.827838
ENSG00000175449.14	chr5	+	2	0.177602	0.674486	0.827838
ENSG00000158793.14	chr1	+	2	0.176146	0.675746	0.828354
ENSG00000197530.12	chr1	+	2	0.175512	0.676296	0.828354
ENSG00000066697.15	chr9	+	2	0.175139	0.67662	0.828354
ENSG00000172831.14	chr16	+	2	0.173874	0.677724	0.828354
ENSG00000128739.23	chr15	+	3	0.390207	0.677728	0.828354
ENSG00000157873.18	chr1	+	2	0.173868	0.677728	0.828354
ENSG00000137106.18	chr9	+	2	0.173625	0.677941	0.828354
ENSG00000115194.11	chr2	-	2	0.172379	0.679032	0.829157
ENSG00000131149.19	chr16	+	2	0.170975	0.680269	0.830137
ENSG00000081923.15	chr18	-	2	0.169481	0.681591	0.831219
ENSG00000189337.17	chr1	+	2	0.167479	0.683372	0.83286
ENSG00000075292.19	chr2	+	2	0.166227	0.684493	0.833073
ENSG00000147140.17	chrX	+	2	0.165623	0.685036	0.833073
ENSG00000175699.15	chr14	+	2	0.165584	0.68507	0.833073
ENSG00000132676.16	chr1	+	2	0.165339	0.685291	0.833073
ENSG00000183072.10	chr5	-	2	0.164227	0.686293	0.833733
ENSG00000135185.12	chr7	-	2	0.163361	0.687077	0.833733
ENSG00000010282.15	chr3	-	2	0.163204	0.68722	0.833733
ENSG00000071575.11	chr2	+	2	0.162808	0.687579	0.833733
ENSG00000107968.10	chr10	+	2	0.160622	0.689575	0.835623
ENSG00000205560.13	chr22	-	2	0.160029	0.690115	0.835747
ENSG00000169499.15	chr8	+	2	0.154346	0.695381	0.841592
ENSG00000277443.3	chr6	+	2	0.153543	0.696135	0.84197
ENSG00000183098.11	chr13	+	2	0.150686	0.698835	0.844584
ENSG00000119333.12	chr9	-	2	0.150005	0.69948	0.844584
ENSG00000092871.17	chr17	-	2	0.149696	0.699775	0.844584
ENSG00000138640.15	chr4	-	2	0.149353	0.700102	0.844584
ENSG00000134138.20	chr15	-	4	0.474432	0.700505	0.844584
ENSG00000122417.15	chr1	-	2	0.146019	0.703305	0.847425
ENSG00000038274.17	chr5	+	2	0.144417	0.704859	0.848763
ENSG00000239523.6	chr3	+	2	0.143365	0.705885	0.849462
ENSG00000127022.16	chr5	+	2	0.142502	0.70673	0.849944
ENSG00000183230.17	chr10	-	2	0.142024	0.707199	0.849973
ENSG00000100234.12	chr22	+	2	0.140797	0.708407	0.85089
ENSG00000186020.13	chr19	-	2	0.138411	0.710775	0.853047
ENSG00000115657.14	chr2	-	2	0.137334	0.711851	0.853047
ENSG00000204634.13	chr2	-	2	0.137308	0.711877	0.853047
ENSG00000094916.16	chr12	-	2	0.137197	0.711988	0.853047
ENSG00000141905.19	chr19	+	7	0.620187	0.714118	0.854801
ENSG00000160360.13	chr9	+	3	0.336622	0.714816	0.854801
ENSG00000137501.17	chr11	-	2	0.134102	0.715109	0.854801
ENSG00000198589.14	chr4	-	2	0.133774	0.715443	0.854801
ENSG00000132466.19	chr4	-	2	0.133532	0.715689	0.854801
ENSG00000250608.2	chr3	-	2	0.132878	0.716355	0.855035
ENSG00000224318.6	chr3	-	2	0.132463	0.716779	0.855035
ENSG00000143321.19	chr1	-	3	0.329927	0.719593	0.857465
ENSG00000211448.13	chr14	-	2	0.129203	0.720135	0.857465
ENSG00000100196.11	chr22	+	2	0.129095	0.720246	0.857465
ENSG00000160271.16	chr9	-	3	0.328177	0.720846	0.857465
ENSG00000167460.17	chr19	+	3	0.327086	0.721635	0.857465
ENSG00000160691.19	chr1	-	2	0.127685	0.721714	0.857465
ENSG00000119314.16	chr9	-	2	0.127385	0.722027	0.857465
ENSG00000118263.15	chr2	-	2	0.127022	0.722406	0.857465
ENSG00000154153.14	chr5	-	2	0.125817	0.723672	0.858434
ENSG00000137801.11	chr15	+	2	0.124279	0.725311	0.858984
ENSG00000153904.21	chr1	-	2	0.12418	0.725401	0.858984
ENSG00000168395.16	chr2	+	2	0.124101	0.725485	0.858984
ENSG00000072518.22	chr11	+	2	0.122767	0.726903	0.85968
ENSG00000164054.15	chr3	-	2	0.122703	0.726972	0.85968
ENSG00000041880.15	chr3	+	2	0.121058	0.728734	0.860523
ENSG00000182473.22	chr17	-	2	0.120992	0.728805	0.860523
ENSG00000170439.7	chr12	+	2	0.120779	0.729035	0.860523
ENSG00000131711.15	chr5	+	2	0.114618	0.735766	0.867651
ENSG00000179348.12	chr3	-	2	0.114424	0.735982	0.867651
ENSG00000239305.7	chr2	-	2	0.110547	0.740326	0.872233
ENSG00000121316.11	chr12	-	2	0.109783	0.741192	0.872443
ENSG00000157600.12	chrX	+	2	0.109585	0.741416	0.872443
ENSG00000196562.14	chr20	-	2	0.108339	0.742839	0.872817
ENSG00000166292.12	chr17	-	2	0.108003	0.743223	0.872817
ENSG00000186635.15	chr11	-	3	0.297003	0.743558	0.872817
ENSG00000283154.2	chr3	+	2	0.107214	0.744128	0.872817
ENSG00000129353.15	chr19	+	2	0.106745	0.744669	0.872817
ENSG00000138326.21	chr10	+	2	0.106541	0.744905	0.872817
ENSG00000160877.6	chr19	+	2	0.106496	0.744956	0.872817
ENSG00000133069.17	chr1	+	3	0.294533	0.745389	0.872817
ENSG00000130294.18	chr2	-	2	0.104416	0.747373	0.87427
ENSG00000163660.12	chr3	-	2	0.104269	0.747544	0.87427
ENSG00000173171.15	chr1	+	2	0.103326	0.748648	0.875025
ENSG00000073910.23	chr13	+	5	0.48029	0.750192	0.87612
ENSG00000090924.15	chr19	+	2	0.101755	0.750501	0.87612
ENSG00000100599.16	chr14	+	2	0.100788	0.751651	0.876491
ENSG00000058262.10	chr3	+	2	0.100715	0.751736	0.876491
ENSG00000250644.3	chr11	-	2	0.0993462	0.753374	0.877138
ENSG00000132640.15	chr20	+	2	0.099176	0.753578	0.877138
ENSG00000101972.19	chrX	+	2	0.0991008	0.753669	0.877138
ENSG00000132849.21	chr1	+	2	0.0979796	0.75502	0.878176
ENSG00000188343.13	chr8	+	2	0.0971934	0.755973	0.878367
ENSG00000164093.17	chr4	-	2	0.0970974	0.756103	0.878367
ENSG00000147862.17	chr9	-	2	0.0959421	0.757499	0.879453
ENSG00000092964.18	chr8	+	2	0.0947453	0.758968	0.880003
ENSG00000171853.16	chr2	+	3	0.276034	0.759242	0.880003
ENSG00000182326.15	chr12	+	2	0.0944323	0.759354	0.880003
ENSG00000102317.18	chrX	+	2	0.0925613	0.761676	0.881452
ENSG00000168824.14	chr4	+	2	0.0924525	0.761812	0.881452
ENSG00000180035.13	chr16	+	2	0.0923111	0.761988	0.881452
ENSG00000083312.18	chr5	+	2	0.0915074	0.762995	0.882083
ENSG00000109670.16	chr4	-	3	0.266383	0.766574	0.885685
ENSG00000215252.11	chr15	-	2	0.0878815	0.767598	0.886332
ENSG00000170153.11	chr4	-	2	0.0865519	0.769311	0.887603
ENSG00000161958.11	chr17	+	3	0.262391	0.769628	0.887603
ENSG00000154309.9	chr1	+	2	0.0854695	0.770717	0.888323
ENSG00000027001.10	chr13	-	2	0.0849473	0.771399	0.888573
ENSG00000138413.14	chr2	-	2	0.0831552	0.773755	0.890264
ENSG00000182809.11	chr14	+	3	0.256647	0.774043	0.890264
ENSG00000166532.16	chr12	+	2	0.0827707	0.774264	0.890264
ENSG00000136925.15	chr9	-	2	0.0815874	0.77584	0.891539
ENSG00000141447.18	chr18	-	2	0.0802914	0.777579	0.892549
ENSG00000036549.13	chr1	-	2	0.0802369	0.777653	0.892549
ENSG00000048707.15	chr1	+	2	0.0796336	0.778468	0.892948
ENSG00000157985.19	chr2	+	2	0.0777242	0.78107	0.895396
ENSG00000110693.18	chr11	-	2	0.0772383	0.781738	0.895624
ENSG00000262879.6	chr17	-	2	0.0764536	0.782821	0.895809
ENSG00000141759.15	chr18	-	2	0.0759849	0.783471	0.895809
ENSG00000128272.16	chr22	+	2	0.0757736	0.783764	0.895809
ENSG00000145819.18	chr5	+	2	0.0756839	0.783889	0.895809
ENSG00000158092.7	chr3	+	2	0.0754295	0.784243	0.895809
ENSG00000198517.10	chr7	+	2	0.0739672	0.786293	0.897614
ENSG00000115902.11	chr2	+	2	0.0733383	0.787181	0.898091
ENSG00000110422.12	chr11	+	2	0.0727604	0.788001	0.89849
ENSG00000008441.18	chr19	+	2	0.0723546	0.788579	0.898613
ENSG00000089159.17	chr12	-	2	0.0716653	0.789564	0.89899
ENSG00000101639.18	chr18	+	2	0.0714651	0.789851	0.89899
ENSG00000147130.14	chrX	-	2	0.0706293	0.791054	0.899824
ENSG00000114544.17	chr3	-	2	0.0699008	0.792109	0.9001
ENSG00000142173.16	chr21	+	4	0.345791	0.792239	0.9001
ENSG00000245060.8	chr5	+	2	0.0672622	0.795981	0.902049
ENSG00000196440.11	chrX	+	2	0.0671084	0.796209	0.902049
ENSG00000070404.10	chr19	+	2	0.0669687	0.796417	0.902049
ENSG00000115183.15	chr2	+	2	0.0666439	0.7969	0.902049
ENSG00000106246.18	chr7	-	2	0.0666439	0.7969	0.902049
ENSG00000138061.12	chr2	-	2	0.0664101	0.797249	0.902049
ENSG00000167641.11	chr19	-	2	0.0664039	0.797258	0.902049
ENSG00000175920.18	chr4	+	2	0.0659019	0.798009	0.90223
ENSG00000181722.17	chr3	-	3	0.225294	0.798601	0.90223
ENSG00000169155.10	chr9	+	2	0.0653517	0.798835	0.90223
ENSG00000008256.16	chr7	-	2	0.064921	0.799485	0.902431
ENSG00000104881.16	chr19	-	2	0.0643498	0.80035	0.902456
ENSG00000138193.16	chr10	+	2	0.0642824	0.800452	0.902456
ENSG00000108821.14	chr17	-	7	0.508782	0.801571	0.902709
ENSG00000101871.16	chrX	-	2	0.0629357	0.802509	0.902709
ENSG00000065882.16	chr4	+	2	0.0629164	0.802538	0.902709
ENSG00000018189.13	chr4	+	2	0.0628988	0.802566	0.902709
ENSG00000145592.14	chr5	-	2	0.0624709	0.803225	0.902741
ENSG00000104853.16	chr19	+	2	0.0622671	0.803539	0.902741
ENSG00000198431.16	chr12	+	4	0.328788	0.804543	0.903338
ENSG00000113657.13	chr5	-	2	0.0610685	0.8054	0.90377
ENSG00000082397.18	chr18	-	2	0.0592341	0.808286	0.906476
ENSG00000080493.18	chr4	+	2	0.0587049	0.809127	0.906887
ENSG00000081189.16	chr5	-	2	0.0581717	0.809979	0.907004
ENSG00000154978.13	chr7	-	2	0.0578069	0.810565	0.907004
ENSG00000105514.8	chr19	-	2	0.0574606	0.811122	0.907004
ENSG00000183963.19	chr22	+	2	0.0574552	0.811131	0.907004
ENSG00000188938.17	chr9	-	3	0.206747	0.813499	0.909121
ENSG00000076242.16	chr3	+	2	0.0544079	0.816114	0.911263
ENSG00000057657.17	chr6	+	2	0.0542536	0.81637	0.911263
ENSG00000188643.11	chr1	-	2	0.0530918	0.818311	0.912739
ENSG00000005238.20	chr9	-	2	0.0527354	0.818911	0.912739
ENSG00000168237.18	chr3	+	2	0.0526092	0.819124	0.912739
ENSG00000115290.10	chr2	-	2	0.0513748	0.821222	0.914543
ENSG00000142871.18	chr1	+	2	0.0505949	0.822571	0.914916
ENSG00000109332.20	chr4	-	3	0.19555	0.82263	0.914916
ENSG00000138606.19	chr15	-	2	0.0503445	0.822994	0.914916
ENSG00000017427.17	chr12	-	2	0.0498381	0.82388	0.91531
ENSG00000150995.20	chr3	+	2	0.0495878	0.824306	0.91531
ENSG00000049323.16	chr2	+	2	0.0487575	0.82576	0.916392
ENSG00000077684.16	chr4	+	2	0.048297	0.826571	0.916759
ENSG00000182149.21	chr16	+	2	0.0464458	0.829874	0.919137
ENSG00000255399.4	chr12	+	2	0.0464215	0.829918	0.919137
ENSG00000130429.15	chr7	+	2	0.0462888	0.830157	0.919137
ENSG00000113648.16	chr5	-	2	0.0459748	0.830726	0.919234
ENSG00000008513.16	chr8	-	2	0.0451687	0.832193	0.919802
ENSG00000196535.17	chr17	-	2	0.0451644	0.832201	0.919802
ENSG00000110665.12	chr11	-	2	0.0442491	0.833888	0.921133
ENSG00000175866.15	chr17	+	2	0.0438947	0.834542	0.921322
ENSG00000197971.16	chr18	-	3	0.178219	0.836969	0.923468
ENSG00000197714.9	chr19	+	2	0.0416604	0.838747	0.92461
ENSG00000144331.20	chr2	-	3	0.175823	0.838971	0.92461
ENSG00000151835.16	chr13	-	2	0.0408024	0.840393	0.925644
ENSG00000182022.18	chr10	-	2	0.0403024	0.841361	0.925981
ENSG00000163820.15	chr3	-	2	0.0401443	0.841668	0.925981
ENSG00000123124.14	chr8	+	2	0.0396845	0.842566	0.926434
ENSG00000165119.21	chr9	-	2	0.0392222	0.843473	0.926598
ENSG00000102678.7	chr13	+	2	0.039115	0.843684	0.926598
ENSG00000158417.11	chr2	+	2	0.038725	0.844455	0.926912
ENSG00000198053.12	chr20	+	2	0.0382911	0.845318	0.927325
ENSG00000115468.12	chr2	+	2	0.0378184	0.846264	0.927325
ENSG00000121964.14	chr2	-	2	0.0374123	0.847081	0.927325
ENSG00000184601.11	chr14	+	2	0.037284	0.84734	0.927325
ENSG00000130558.20	chr9	+	2	0.0372279	0.847454	0.927325
ENSG00000136758.19	chr10	-	2	0.0367964	0.848329	0.927325
ENSG00000095787.24	chr10	+	2	0.0362749	0.849395	0.927325
ENSG00000073849.16	chr3	+	3	0.162013	0.850606	0.927325
ENSG00000119917.15	chr10	+	2	0.0356216	0.850749	0.927325
ENSG00000111913.20	chr6	-	2	0.0351781	0.851662	0.927325
ENSG00000185129.8	chr5	+	2	0.0351185	0.851786	0.927325
ENSG00000075391.17	chr1	+	2	0.0350996	0.851825	0.927325
ENSG00000100242.15	chr22	-	3	0.160401	0.851975	0.927325
ENSG00000095794.19	chr10	+	3	0.159803	0.852483	0.927325
ENSG00000085563.15	chr7	-	2	0.0347832	0.852487	0.927325
ENSG00000150938.10	chr2	+	2	0.0347313	0.852596	0.927325
ENSG00000162433.15	chr1	+	3	0.158486	0.853604	0.927894
ENSG00000166025.18	chr11	+	2	0.0332111	0.855821	0.929266
ENSG00000074964.17	chr1	+	2	0.0330365	0.856196	0.929266
ENSG00000168883.20	chr2	+	2	0.0329764	0.856326	0.929266
ENSG00000138185.20	chr10	+	2	0.0325106	0.857333	0.929338
ENSG00000167081.18	chr9	+	2	0.0324962	0.857364	0.929338
ENSG00000128789.21	chr18	+	2	0.0320359	0.858367	0.929897
ENSG00000137502.10	chr11	-	2	0.0315169	0.859507	0.930605
ENSG00000131386.19	chr3	+	2	0.030981	0.860694	0.931362
ENSG00000105810.10	chr7	-	2	0.0305306	0.8617	0.931923
ENSG00000136068.15	chr3	+	2	0.0300404	0.862803	0.932588
ENSG00000101294.18	chr20	+	2	0.0287437	0.865768	0.934603
ENSG00000156802.13	chr8	-	2	0.0285515	0.866213	0.934603
ENSG00000155096.14	chr8	-	2	0.0283622	0.866653	0.934603
ENSG00000141867.19	chr19	-	2	0.0281994	0.867033	0.934603
ENSG00000127824.14	chr2	-	2	0.0281654	0.867112	0.934603
ENSG00000196923.14	chr5	-	2	0.027201	0.869386	0.936525
ENSG00000168273.8	chr3	+	2	0.0266446	0.870716	0.937185
ENSG00000185567.7	chr14	-	2	0.026416	0.871267	0.937185
ENSG00000172992.12	chr17	-	2	0.0263323	0.871469	0.937185
ENSG00000182871.16	chr21	+	2	0.0246404	0.875632	0.940127
ENSG00000187535.14	chr16	-	2	0.0241203	0.876941	0.940127
ENSG00000106565.18	chr7	-	2	0.0240712	0.877065	0.940127
ENSG00000197879.17	chr17	-	3	0.130836	0.877481	0.940127
ENSG00000225733.6	chr3	-	2	0.0238856	0.877536	0.940127
ENSG00000141012.13	chr16	-	2	0.0237277	0.877938	0.940127
ENSG00000196605.7	chr19	-	2	0.0236633	0.878102	0.940127
ENSG00000115998.8	chr2	-	2	0.0235873	0.878297	0.940127
ENSG00000109501.14	chr4	+	2	0.0234565	0.878632	0.940127
ENSG00000164591.14	chr5	+	2	0.022849	0.880202	0.941279
ENSG00000159314.11	chr17	-	3	0.124517	0.883031	0.943471
ENSG00000180155.20	chr8	-	2	0.0216966	0.883239	0.943471
ENSG00000186439.14	chr6	-	2	0.0213416	0.884192	0.943961
ENSG00000105426.17	chr19	-	4	0.215642	0.885453	0.94478
ENSG00000103043.15	chr16	-	2	0.0200654	0.887683	0.946631
ENSG00000092068.20	chr14	-	2	0.0195562	0.889108	0.947622
ENSG00000057294.15	chr12	-	2	0.0188913	0.890998	0.948336
ENSG00000169926.11	chr15	+	2	0.0188761	0.891041	0.948336
ENSG00000165806.21	chr10	+	2	0.0187212	0.891486	0.948336
ENSG00000108312.15	chr17	-	2	0.0184689	0.892215	0.948336
ENSG00000137962.13	chr1	-	2	0.0181593	0.893117	0.948336
ENSG00000168071.22	chr11	+	2	0.0181262	0.893214	0.948336
ENSG00000223969.6	chr7	-	2	0.0181132	0.893252	0.948336
ENSG00000131697.18	chr1	-	2	0.0175244	0.894991	0.949655
ENSG00000198563.14	chr6	-	2	0.0171717	0.896047	0.950063
ENSG00000101191.17	chr20	-	2	0.0170643	0.89637	0.950063
ENSG00000154262.13	chr17	-	2	0.0155566	0.901029	0.954472
ENSG00000144118.14	chr2	+	2	0.0152006	0.902162	0.954922
ENSG00000100664.11	chr14	+	2	0.0151097	0.902454	0.954922
ENSG00000072778.20	chr17	+	4	0.189372	0.903526	0.955142
ENSG00000196628.20	chr18	-	6	0.314417	0.904064	0.955142
ENSG00000196504.19	chr2	-	2	0.0144971	0.904442	0.955142
ENSG00000054654.19	chr14	+	4	0.187208	0.904993	0.955142
ENSG00000128591.16	chr7	+	2	0.0141878	0.905467	0.955142
ENSG00000124788.19	chr6	-	2	0.0138208	0.906687	0.955142
ENSG00000141540.11	chr17	+	2	0.0137189	0.90703	0.955142
ENSG00000075420.13	chr3	+	2	0.0136964	0.907106	0.955142
ENSG00000182957.16	chr13	+	2	0.0136803	0.90716	0.955142
ENSG00000120690.16	chr13	-	2	0.0135177	0.907711	0.955196
ENSG00000131828.14	chrX	+	2	0.0131296	0.90904	0.956068
ENSG00000134871.19	chr13	+	2	0.0128232	0.910103	0.956282
ENSG00000134769.22	chr18	+	3	0.093882	0.910454	0.956282
ENSG00000102804.15	chr13	-	4	0.178017	0.911184	0.956282
ENSG00000104976.12	chr19	+	2	0.0123698	0.9117	0.956282
ENSG00000092820.18	chr6	-	2	0.0120662	0.912786	0.956282
ENSG00000087266.17	chr4	+	2	0.012001	0.91302	0.956282
ENSG00000152413.15	chr5	-	2	0.0119981	0.913031	0.956282
ENSG00000150630.4	chr4	-	2	0.0118346	0.913623	0.956282
ENSG00000249464.6	chr4	+	2	0.011739	0.913971	0.956282
ENSG00000223865.11	chr6	+	2	0.0116634	0.914248	0.956282
ENSG00000149131.17	chr11	+	2	0.0113128	0.915541	0.957111
ENSG00000178951.9	chr19	-	2	0.0110318	0.916593	0.957478
ENSG00000017260.20	chr3	+	2	0.0109519	0.916894	0.957478
ENSG00000151135.10	chr12	+	2	0.0106002	0.918235	0.957609
ENSG00000179818.14	chr2	-	2	0.0105972	0.918246	0.957609
ENSG00000141068.14	chr17	+	2	0.0103667	0.919137	0.957609
ENSG00000086015.22	chr1	+	2	0.0102849	0.919456	0.957609
ENSG00000112624.12	chr6	+	2	0.0102671	0.919525	0.957609
ENSG00000168016.15	chr3	-	2	0.00981939	0.921294	0.958928
ENSG00000125844.16	chr20	-	2	0.0096738	0.921877	0.959013
ENSG00000104964.15	chr19	-	2	0.00954914	0.922381	0.959015
ENSG00000177685.17	chr11	+	2	0.00924659	0.923616	0.959777
ENSG00000114993.17	chr2	-	2	0.00895403	0.924831	0.960517
ENSG00000152700.14	chr5	-	2	0.00861936	0.926245	0.960755
ENSG00000120896.13	chr8	+	3	0.0766272	0.926278	0.960755
ENSG00000121361.5	chr12	-	2	0.00847471	0.926864	0.960755
ENSG00000023191.17	chr11	-	3	0.0757496	0.92709	0.960755
ENSG00000181031.16	chr17	-	2	0.00814681	0.928289	0.960755
ENSG00000159720.12	chr16	-	2	0.00810837	0.928458	0.960755
ENSG00000110237.5	chr11	+	2	0.00808082	0.928579	0.960755
ENSG00000087086.15	chr19	+	2	0.00765193	0.930496	0.961299
ENSG00000145860.12	chr5	-	2	0.0075552	0.930935	0.961299
ENSG00000065802.12	chr2	+	2	0.00752207	0.931087	0.961299
ENSG00000027075.15	chr14	+	2	0.00751543	0.931117	0.961299
ENSG00000277258.5	chr17	-	2	0.00727434	0.932228	0.961926
ENSG00000135631.17	chr2	-	2	0.00677863	0.934572	0.96348
ENSG00000101276.18	chr20	-	2	0.00674344	0.934742	0.96348
ENSG00000223695.1	chr22	+	2	0.00634675	0.936686	0.964964
ENSG00000105321.14	chr19	+	2	0.00611022	0.937875	0.965667
ENSG00000148985.20	chr11	+	3	0.0613247	0.940546	0.966584
ENSG00000067057.18	chr10	+	4	0.131186	0.941423	0.966584
ENSG00000060982.15	chr12	-	2	0.00541391	0.941515	0.966584
ENSG00000107816.17	chr10	+	2	0.00541226	0.941524	0.966584
ENSG00000172262.11	chr5	+	3	0.0601083	0.941689	0.966584
ENSG00000127870.17	chr13	-	2	0.00536112	0.9418	0.966584
ENSG00000198844.12	chr17	+	2	0.00499146	0.943839	0.967666
ENSG00000179820.16	chr19	+	2	0.00497208	0.943948	0.967666
ENSG00000172346.15	chr22	+	2	0.00481601	0.944833	0.967666
ENSG00000087095.13	chr17	+	2	0.00480787	0.94488	0.967666
ENSG00000137074.20	chr9	-	2	0.00457761	0.946214	0.968439
ENSG00000107669.18	chr10	-	2	0.0045039	0.946648	0.968439
ENSG00000160216.21	chr21	+	3	0.0535183	0.94791	0.968676
ENSG00000157216.16	chr1	-	2	0.00424815	0.948183	0.968676
ENSG00000196526.10	chr4	-	2	0.00421251	0.9484	0.968676
ENSG00000163848.20	chr3	-	2	0.00407608	0.949241	0.968934
ENSG00000102547.19	chr13	-	2	0.00400794	0.949667	0.968934
ENSG00000197321.15	chr10	-	3	0.0505806	0.950697	0.969462
ENSG00000116871.15	chr1	+	2	0.00375014	0.95131	0.969462
ENSG00000152601.17	chr3	+	2	0.00368941	0.951706	0.969462
ENSG00000171425.10	chr19	+	2	0.00333585	0.954075	0.970662
ENSG00000115904.14	chr2	-	2	0.0033054	0.954285	0.970662
ENSG00000089876.12	chr10	-	2	0.00328767	0.954408	0.970662
ENSG00000171680.23	chr1	-	2	0.00320667	0.954972	0.970719
ENSG00000107262.26	chr9	-	2	0.00283477	0.957661	0.972935
ENSG00000124535.16	chr6	+	2	0.0027564	0.95825	0.973016
ENSG00000116922.14	chr1	-	2	0.00268398	0.958802	0.97303
ENSG00000145431.11	chr4	-	2	0.00262164	0.959282	0.97303
ENSG00000215386.13	chr21	+	3	0.0406807	0.960148	0.973392
ENSG00000176170.14	chr17	+	2	0.00218821	0.962799	0.975562
ENSG00000125818.18	chr20	+	2	0.00204498	0.964035	0.976296
ENSG00000177548.13	chr16	-	2	0.00146567	0.969549	0.979649
ENSG00000126970.16	chrX	-	2	0.00137539	0.970502	0.979649
ENSG00000065054.14	chr16	+	3	0.0296805	0.970762	0.979649
ENSG00000102575.13	chr19	-	2	0.00131184	0.971191	0.979649
ENSG00000060656.20	chr1	+	2	0.00131033	0.971207	0.979649
ENSG00000118046.16	chr19	+	2	0.00126973	0.971657	0.979649
ENSG00000137094.15	chr9	+	3	0.0287113	0.971703	0.979649
ENSG00000110871.15	chr12	-	2	0.00122691	0.972139	0.979649
ENSG00000168264.11	chr1	-	2	0.00121461	0.972279	0.979649
ENSG00000070778.13	chr14	-	2	0.00119766	0.972473	0.979649
ENSG00000172613.8	chr11	+	2	0.000991247	0.974956	0.98126
ENSG00000205268.11	chr8	-	2	0.000930816	0.975731	0.98126
ENSG00000129009.13	chr15	+	2	0.000910024	0.976004	0.98126
ENSG00000143995.20	chr2	+	2	0.000900805	0.976125	0.98126
ENSG00000244687.12	chr20	-	2	0.000858252	0.976696	0.981318
ENSG00000169641.13	chr1	-	2	0.000807276	0.977398	0.981345
ENSG00000143353.12	chr1	+	2	0.000782294	0.977751	0.981345
ENSG00000135956.9	chr2	-	2	0.000590119	0.980675	0.983764
ENSG00000069122.19	chr6	-	2	0.000461942	0.982902	0.98548
ENSG00000170776.22	chr15	+	4	0.0518395	0.984372	0.986436
ENSG00000159840.16	chr7	+	3	0.0124102	0.987668	0.989221
ENSG00000247271.7	chr11	+	2	0.000196075	0.98886	0.989896
ENSG00000233237.8	chr6	-	2	0.000100324	0.992031	0.992551
ENSG00000118137.10	chr11	-	2	6.05274e-06	0.998043	0.998043

## Sheet: CAGE.DPU.Healthy.Ventricle
geneId	cluster_chr	cluster_strand	NExons	gene.F	P.Value	FDR
ENSG00000129824.16	chrY	+	2	1517.58	1.64976e-49	3.16424e-46
ENSG00000095794.19	chr10	+	3	29.7476	6.44185e-11	6.17774e-08
ENSG00000108821.14	chr17	-	7	10.8368	1.27769e-10	8.16871e-08
ENSG00000073910.23	chr13	+	5	11.5784	2.5541e-08	1.22469e-05
ENSG00000173918.15	chr17	+	5	10.374	1.58669e-07	5.17916e-05
ENSG00000171877.21	chr15	-	2	33.8065	1.62017e-07	5.17916e-05
ENSG00000134294.14	chr12	-	2	30.04	6.15684e-07	0.000168697
ENSG00000213853.10	chr16	-	2	27.9908	1.30266e-06	0.000312312
ENSG00000177098.9	chr11	-	2	27.1618	1.77268e-06	0.000377777
ENSG00000172348.15	chr6	-	2	26.4709	2.3638e-06	0.00042886
ENSG00000023171.18	chr11	+	3	14.6893	2.45957e-06	0.00042886
ENSG00000109819.9	chr4	-	2	25.7386	3.02892e-06	0.000484123
ENSG00000003402.20	chr2	+	4	10.4015	3.34875e-06	0.00049407
ENSG00000185437.14	chr21	+	3	14.1848	3.63522e-06	0.000498025
ENSG00000109971.14	chr11	-	3	14.0683	3.98299e-06	0.000509291
ENSG00000114062.22	chr15	-	2	24.6946	4.51249e-06	0.000522377
ENSG00000168309.18	chr3	-	3	13.8768	4.63004e-06	0.000522377
ENSG00000100097.12	chr22	+	3	13.6801	5.40662e-06	0.000576105
ENSG00000137801.11	chr15	+	2	23.6984	6.66117e-06	0.000672427
ENSG00000102531.16	chr13	+	3	12.7823	1.10395e-05	0.00105868
ENSG00000135404.12	chr12	-	4	9.3523	1.16839e-05	0.00106713
ENSG00000022267.19	chrX	+	5	7.53988	1.31629e-05	0.00114757
ENSG00000124831.19	chr2	+	3	12.3795	1.52557e-05	0.00127219
ENSG00000184007.22	chr1	-	3	12.2113	1.74728e-05	0.00139637
ENSG00000228474.6	chr2	-	2	20.2212	2.63959e-05	0.00202509
ENSG00000153774.9	chr16	-	2	19.6909	3.27618e-05	0.00236414
ENSG00000113742.14	chr5	+	4	8.48603	3.32804e-05	0.00236414
ENSG00000092964.18	chr8	+	2	19.5424	3.48143e-05	0.00238478
ENSG00000109846.9	chr11	-	4	8.34524	3.95027e-05	0.00259677
ENSG00000148985.20	chr11	+	3	11.1667	4.09193e-05	0.00259677
ENSG00000173598.14	chr12	+	2	19.0875	4.19707e-05	0.00259677
ENSG00000099622.14	chr19	+	3	10.7281	5.87392e-05	0.00340517
ENSG00000196352.16	chr1	+	2	18.1781	6.11932e-05	0.00340517
ENSG00000126970.16	chrX	-	2	18.1671	6.1476e-05	0.00340517
ENSG00000211445.12	chr5	+	3	10.6601	6.21381e-05	0.00340517
ENSG00000114391.13	chr3	-	2	17.7195	7.41419e-05	0.00395011
ENSG00000119314.16	chr9	-	2	17.58	7.86178e-05	0.00405033
ENSG00000187498.16	chr13	-	2	17.5313	8.02463e-05	0.00405033
ENSG00000133083.15	chr13	-	3	10.018	0.000106974	0.0052609
ENSG00000187079.20	chr11	+	2	16.7024	0.000113983	0.0054655
ENSG00000170439.7	chr12	+	2	16.6016	0.000118988	0.00548512
ENSG00000110700.7	chr11	-	2	16.5672	0.000120746	0.00548512
ENSG00000134321.13	chr2	+	2	16.5462	0.000123497	0.00548512
ENSG00000080503.24	chr9	+	4	7.4009	0.000125832	0.00548512
ENSG00000071082.11	chr2	+	2	16.1845	0.000142228	0.00606206
ENSG00000115641.19	chr2	-	3	9.61558	0.000149872	0.00624902
ENSG00000162819.12	chr1	+	2	15.9008	0.000160677	0.00655699
ENSG00000079308.19	chr2	-	9	3.96441	0.000177747	0.0070192
ENSG00000072210.19	chr17	+	2	15.6465	0.000179323	0.0070192
ENSG00000140264.21	chr15	+	3	9.35225	0.000185667	0.00712219
ENSG00000086666.19	chr15	+	2	15.1677	0.000220732	0.00830124
ENSG00000071127.17	chr4	-	3	9.0632	0.000237235	0.00875033
ENSG00000143947.15	chr2	+	2	14.689	0.000272096	0.00984681
ENSG00000117859.19	chr1	+	2	14.5549	0.000288604	0.0101611
ENSG00000076770.14	chrX	-	2	14.5332	0.000291376	0.0101611
ENSG00000186073.14	chr15	+	2	14.2511	0.000329932	0.0113002
ENSG00000166974.13	chr18	+	2	14.1554	0.000344198	0.011582
ENSG00000179348.12	chr3	-	2	14.027	0.00036432	0.0120477
ENSG00000167244.21	chr11	-	4	6.50726	0.000381953	0.0124167
ENSG00000121361.5	chr12	-	2	13.764	0.000409462	0.0130891
ENSG00000115306.16	chr2	+	3	8.38892	0.00042216	0.0131972
ENSG00000147065.17	chrX	+	2	13.6634	0.000428212	0.0131972
ENSG00000198336.9	chr17	+	3	8.35539	0.000435007	0.0131972
ENSG00000173113.7	chr11	-	2	13.6007	0.000440366	0.0131972
ENSG00000108852.15	chr17	-	2	13.536	0.000453264	0.0133131
ENSG00000063177.13	chr19	-	2	13.5122	0.000458114	0.0133131
ENSG00000064225.12	chr3	+	2	13.4379	0.00047359	0.0134792
ENSG00000156256.15	chr21	+	2	13.4018	0.000485923	0.0134792
ENSG00000170290.4	chr11	-	2	13.4	0.00048633	0.0134792
ENSG00000132475.10	chr17	-	3	8.21121	0.000491942	0.0134792
ENSG00000132471.12	chr17	-	2	13.2324	0.000519244	0.0140269
ENSG00000182899.17	chr3	+	2	13.0128	0.00057312	0.0150922
ENSG00000198832.10	chr22	-	2	13.0078	0.000574417	0.0150922
ENSG00000198482.14	chr19	+	2	12.9254	0.000596148	0.0154515
ENSG00000151150.22	chr10	-	4	6.13343	0.000610086	0.0156019
ENSG00000107959.17	chr10	-	2	12.6773	0.000666891	0.0168302
ENSG00000185201.17	chr11	+	2	12.5467	0.000707565	0.0176248
ENSG00000144524.18	chr2	+	2	12.4603	0.0007359	0.0180227
ENSG00000198755.11	chr6	+	2	12.4411	0.000742332	0.0180227
ENSG00000135090.14	chr12	-	2	12.3525	0.000772865	0.0185294
ENSG00000108848.16	chr17	+	3	7.64704	0.000801963	0.0189897
ENSG00000196482.18	chr1	-	5	4.96154	0.000836591	0.0195681
ENSG00000136942.15	chr9	-	3	7.58217	0.000848567	0.019609
ENSG00000036672.16	chr11	-	4	5.8313	0.000892137	0.0203191
ENSG00000149273.15	chr11	+	2	12.0178	0.000900481	0.0203191
ENSG00000048052.23	chr7	+	4	5.8046	0.000922669	0.0205314
ENSG00000100266.19	chr22	-	2	11.9444	0.0009313	0.0205314
ENSG00000145362.20	chr4	+	5	4.85699	0.00099158	0.0216119
ENSG00000060656.20	chr1	+	2	11.7725	0.00100779	0.0217183
ENSG00000275215.1	chr21	+	2	11.7237	0.00103863	0.0221344
ENSG00000084090.14	chr2	-	2	11.6333	0.00107448	0.022362
ENSG00000125844.16	chr20	-	2	11.6248	0.00107868	0.022362
ENSG00000142676.14	chr1	+	2	11.6136	0.00108429	0.022362
ENSG00000112936.19	chr5	+	4	5.6486	0.00112334	0.022921
ENSG00000237125.11	chr4	+	3	7.24633	0.00113799	0.0229754
ENSG00000100418.8	chr22	-	2	11.3401	0.0012304	0.0245825
ENSG00000185650.10	chr14	-	2	11.2523	0.00128153	0.02534
ENSG00000157654.19	chr9	+	7	3.77207	0.00132994	0.0260288
ENSG00000185787.15	chr15	+	2	11.1254	0.00135935	0.0263358
ENSG00000168575.10	chr8	-	2	11.0666	0.00139707	0.0265965
ENSG00000144824.21	chr3	+	4	5.47273	0.00140447	0.0265965
ENSG00000108107.15	chr19	+	2	11.0329	0.00141916	0.0265965
ENSG00000160808.11	chr3	-	2	11.0192	0.00142828	0.0265965
ENSG00000113578.18	chr5	-	2	10.9752	0.00145785	0.0268861
ENSG00000132170.23	chr3	+	2	10.7176	0.00164438	0.0298368
ENSG00000131711.15	chr5	+	2	10.7091	0.00165096	0.0298368
ENSG00000141552.18	chr17	+	2	10.6907	0.00166527	0.0298368
ENSG00000116922.14	chr1	-	2	10.6668	0.00168404	0.0298368
ENSG00000196502.12	chr16	-	2	10.6522	0.00169563	0.0298368
ENSG00000110871.15	chr12	-	2	10.6169	0.00172392	0.0298811
ENSG00000124788.19	chr6	-	2	10.6103	0.0017293	0.0298811
ENSG00000165269.13	chr9	-	2	10.5235	0.00180127	0.0308468
ENSG00000125730.17	chr19	-	2	10.4436	0.00187033	0.031746
ENSG00000101413.12	chr20	+	3	6.63846	0.00194397	0.0327064
ENSG00000165912.16	chr11	-	2	10.2868	0.0020139	0.0335884
ENSG00000178573.7	chr16	-	2	10.248	0.00205115	0.0339147
ENSG00000186635.15	chr11	-	3	6.54707	0.00210796	0.0345562
ENSG00000111716.14	chr12	-	3	6.45943	0.00227848	0.037035
ENSG00000115685.15	chr2	+	2	9.9953	0.00231203	0.0372645
ENSG00000156110.15	chr10	+	2	9.94422	0.00236884	0.0378001
ENSG00000075711.21	chr3	-	2	9.91834	0.00240072	0.0378001
ENSG00000261371.6	chr17	-	2	9.91291	0.00240439	0.0378001
ENSG00000113441.16	chr5	+	2	9.71581	0.00264122	0.0411659
ENSG00000188938.17	chr9	-	3	6.27672	0.00268064	0.0411659
ENSG00000105193.9	chr19	-	2	9.67571	0.00269231	0.0411659
ENSG00000114473.14	chr3	-	3	6.26761	0.00270433	0.0411659
ENSG00000106018.14	chr7	-	2	9.55154	0.00285714	0.042953
ENSG00000148219.18	chr9	-	2	9.53229	0.00288362	0.042953
ENSG00000205581.11	chr21	-	2	9.5147	0.00290804	0.042953
ENSG00000107669.18	chr10	-	2	9.51236	0.00291131	0.042953
ENSG00000133313.15	chr18	+	2	9.44861	0.00300173	0.0433845
ENSG00000005882.12	chr17	+	2	9.44623	0.00300516	0.0433845
ENSG00000166532.16	chr12	+	2	9.44398	0.00300842	0.0433845
ENSG00000162772.17	chr1	+	3	6.09598	0.00314986	0.0450853
ENSG00000139112.11	chr12	+	3	6.08603	0.00317801	0.0451513
ENSG00000185624.16	chr17	-	3	6.05302	0.00327321	0.0460815
ENSG00000185022.12	chr22	+	2	9.25702	0.00329153	0.0460815
ENSG00000197360.9	chr19	-	2	9.14684	0.00347127	0.0482456
ENSG00000160360.13	chr9	+	3	5.92174	0.00368349	0.0508269
ENSG00000105220.17	chr19	+	3	5.86553	0.00387197	0.0530459
ENSG00000224397.7	chr20	+	2	8.85578	0.00399702	0.0541487
ENSG00000082014.17	chr7	-	2	8.84966	0.00400893	0.0541487
ENSG00000168734.14	chr20	+	2	8.78275	0.00414156	0.0551034
ENSG00000186184.19	chr13	+	2	8.77476	0.00415769	0.0551034
ENSG00000075624.17	chr7	-	2	8.77076	0.00416579	0.0551034
ENSG00000184489.13	chr8	+	4	4.59797	0.00426196	0.0556135
ENSG00000041982.16	chr9	-	2	8.73336	0.00426235	0.0556135
ENSG00000115310.18	chr2	-	3	5.74853	0.00430112	0.0557402
ENSG00000198715.13	chr1	-	2	8.60428	0.00451819	0.0579468
ENSG00000129991.13	chr19	-	2	8.59982	0.00453182	0.0579468
ENSG00000159840.16	chr7	+	3	5.67616	0.00459055	0.0583091
ENSG00000132507.18	chr17	+	2	8.49376	0.00476919	0.0601796
ENSG00000198034.11	chrX	-	2	8.42184	0.00494031	0.0619314
ENSG00000173812.11	chr17	+	2	8.27917	0.00529905	0.0658117
ENSG00000169764.16	chr2	+	3	5.51294	0.00531847	0.0658117
ENSG00000196652.12	chr7	+	2	8.25067	0.00537392	0.0660716
ENSG00000147684.10	chr8	+	2	8.22273	0.00544837	0.0665604
ENSG00000130175.10	chr19	+	2	8.19323	0.00552817	0.0671078
ENSG00000167106.12	chr9	-	3	5.4622	0.00556791	0.0671651
ENSG00000140350.15	chr15	-	2	8.0372	0.00597108	0.0712063
ENSG00000139218.18	chr12	-	2	8.02777	0.00599899	0.0712063
ENSG00000079215.15	chr5	+	3	5.37694	0.0060143	0.0712063
ENSG00000079819.19	chr6	-	2	7.99307	0.00610295	0.0716088
ENSG00000126267.11	chr19	+	2	7.98646	0.00612296	0.0716088
ENSG00000167792.13	chr11	+	3	5.34246	0.00620506	0.0719303
ENSG00000160691.19	chr1	-	2	7.95296	0.00622546	0.0719303
ENSG00000170473.17	chr12	-	2	7.93873	0.00626954	0.0720059
ENSG00000144596.13	chr3	-	2	7.92292	0.00631889	0.0721407
ENSG00000136436.15	chr17	+	3	5.2993	0.00645253	0.0732305
ENSG00000137168.8	chr6	-	2	7.8488	0.00655575	0.0739643
ENSG00000092969.12	chr1	+	2	7.72366	0.00700374	0.0785566
ENSG00000113916.18	chr3	-	2	7.67919	0.00713347	0.0795465
ENSG00000101940.18	chrX	+	2	7.64583	0.00725323	0.080128
ENSG00000106052.13	chr7	+	2	7.64143	0.00726917	0.080128
ENSG00000083720.13	chr5	-	2	7.59557	0.00743767	0.0815169
ENSG00000139579.13	chr12	+	2	7.55868	0.00757615	0.0824951
ENSG00000140939.14	chr16	+	2	7.549	0.00761295	0.0824951
ENSG00000266412.6	chr10	-	2	7.43301	0.00806856	0.0865234
ENSG00000110955.9	chr12	-	3	5.0524	0.00807492	0.0865234
ENSG00000125618.18	chr2	-	2	7.34121	0.00844942	0.0898374
ENSG00000185088.14	chr15	-	2	7.33213	0.00848809	0.0898374
ENSG00000150991.15	chr12	-	2	7.32358	0.00852471	0.0898374
ENSG00000133065.11	chr1	-	2	7.3033	0.00861217	0.090263
ENSG00000152795.18	chr4	-	2	7.29245	0.00865933	0.0902641
ENSG00000170142.12	chr3	+	2	7.27597	0.00873151	0.0905245
ENSG00000119699.8	chr14	-	2	7.23454	0.00891579	0.091938
ENSG00000189350.13	chr2	+	2	7.20525	0.00904847	0.092599
ENSG00000157600.12	chrX	+	2	7.19679	0.00908721	0.092599
ENSG00000141736.14	chr17	+	2	7.18171	0.00915667	0.092599
ENSG00000123562.18	chrX	-	2	7.17818	0.009173	0.092599
ENSG00000167797.8	chr11	-	2	7.11272	0.00948154	0.0952125
ENSG00000184060.11	chr17	+	2	6.99061	0.0100866	0.100761
ENSG00000005302.19	chrX	+	2	6.9676	0.0102051	0.101102
ENSG00000156298.13	chrX	+	2	6.96354	0.0102262	0.101102
ENSG00000138303.18	chr10	-	3	4.78323	0.0103233	0.101161
ENSG00000010256.11	chr3	-	2	6.94019	0.0103482	0.101161
ENSG00000163072.16	chr2	+	2	6.93073	0.010398	0.101161
ENSG00000240583.14	chr7	+	3	4.77062	0.0104431	0.101161
ENSG00000156467.10	chr8	-	3	4.74811	0.0106604	0.102727
ENSG00000161513.12	chr17	-	2	6.85614	0.0108001	0.102727
ENSG00000105223.20	chr19	+	3	4.73367	0.0108022	0.102727
ENSG00000249307.7	chr4	+	2	6.85271	0.010819	0.102727
ENSG00000123349.15	chr12	+	2	6.8062	0.0110847	0.104247
ENSG00000111639.8	chr12	-	2	6.80454	0.0110878	0.104247
ENSG00000204520.14	chr6	+	2	6.78694	0.011217	0.10484
ENSG00000134333.14	chr11	+	2	6.77431	0.0112601	0.10484
ENSG00000119927.14	chr10	-	2	6.76043	0.011375	0.105099
ENSG00000134419.15	chr16	-	2	6.75053	0.0113976	0.105099
ENSG00000105321.14	chr19	+	2	6.67404	0.0118521	0.108767
ENSG00000153406.14	chr16	-	2	6.65549	0.0119651	0.109157
ENSG00000164708.6	chr7	-	2	6.65427	0.0120084	0.109157
ENSG00000162241.12	chr11	-	2	6.62463	0.0121557	0.109325
ENSG00000126217.21	chr13	+	2	6.62282	0.012167	0.109325
ENSG00000140830.9	chr16	-	2	6.61147	0.0122379	0.109325
ENSG00000185010.15	chrX	-	2	6.60352	0.0122879	0.109325
ENSG00000118785.14	chr4	+	2	6.60471	0.0123166	0.109325
ENSG00000221983.8	chr19	+	2	6.5907	0.0123689	0.109325
ENSG00000135077.9	chr5	-	3	4.57693	0.0124718	0.109682
ENSG00000249464.6	chr4	+	2	6.56647	0.0125236	0.109682
ENSG00000147403.18	chrX	+	2	6.54944	0.0126335	0.110141
ENSG00000126457.22	chr19	+	3	4.54911	0.0127946	0.110779
ENSG00000117228.11	chr1	-	2	6.51563	0.0128548	0.110779
ENSG00000198947.17	chrX	-	3	4.54187	0.0128799	0.110779
ENSG00000139132.15	chr12	+	4	3.71847	0.0131161	0.112163
ENSG00000137936.18	chr1	-	2	6.47032	0.0131578	0.112163
ENSG00000153487.13	chr13	+	2	6.45464	0.0132644	0.112571
ENSG00000160408.15	chr9	-	2	6.42225	0.0134874	0.11396
ENSG00000165929.13	chr14	-	2	6.40401	0.0136148	0.114531
ENSG00000196465.10	chr12	+	2	6.37606	0.0138124	0.115686
ENSG00000175334.8	chr11	+	2	6.34895	0.014007	0.116287
ENSG00000172403.11	chr4	+	2	6.35336	0.0140138	0.116287
ENSG00000164713.10	chr7	+	3	4.44606	0.014066	0.116287
ENSG00000170906.16	chr19	+	2	6.28362	0.0144878	0.11926
ENSG00000108953.17	chr17	-	2	6.27254	0.0145711	0.119433
ENSG00000087008.16	chr4	-	2	6.26026	0.0146639	0.119682
ENSG00000136156.15	chr13	+	3	4.37549	0.0150106	0.121896
ENSG00000171425.10	chr19	+	2	6.20851	0.0150622	0.121896
ENSG00000103994.18	chr15	-	3	4.33879	0.0155271	0.124427
ENSG00000141759.15	chr18	-	2	6.14682	0.0155519	0.124427
ENSG00000135905.20	chr2	-	2	6.14464	0.0155695	0.124427
ENSG00000112096.19	chr6	-	3	4.32552	0.0157182	0.125093
ENSG00000228300.14	chr19	+	2	6.11708	0.015794	0.125177
ENSG00000131730.16	chr5	+	3	4.31357	0.0158923	0.125438
ENSG00000100354.21	chr22	+	2	6.04311	0.0164134	0.128163
ENSG00000172819.17	chr12	-	3	4.27768	0.0164276	0.128163
ENSG00000096696.14	chr6	+	2	6.03615	0.0164731	0.128163
ENSG00000173641.18	chr1	-	2	6.03333	0.0165049	0.128163
ENSG00000149557.14	chr11	-	4	3.53094	0.0166753	0.128965
ENSG00000198276.16	chr20	-	2	5.99781	0.0168055	0.12945
ENSG00000073711.11	chr3	+	2	5.97858	0.0169749	0.130231
ENSG00000131016.17	chr6	+	3	4.23477	0.0170915	0.130604
ENSG00000164741.15	chr8	-	3	4.2167	0.0173793	0.131155
ENSG00000156265.16	chr21	+	2	5.93338	0.017388	0.131155
ENSG00000188176.12	chr17	+	2	5.92886	0.0174212	0.131155
ENSG00000145390.11	chr4	+	2	5.92641	0.0174435	0.131155
ENSG00000135387.21	chr11	+	2	5.91913	0.0175101	0.131155
ENSG00000058668.15	chr1	+	2	5.91216	0.0175739	0.131155
ENSG00000162734.13	chr1	+	2	5.87816	0.0178892	0.132991
ENSG00000088986.11	chr12	+	2	5.8608	0.0180525	0.133557
ENSG00000184009.13	chr17	-	2	5.85528	0.0181047	0.133557
ENSG00000167685.15	chr19	+	2	5.84093	0.0182414	0.13405
ENSG00000265972.6	chr1	-	2	5.80716	0.0185671	0.135526
ENSG00000175920.18	chr4	+	2	5.80629	0.0185836	0.135526
ENSG00000197746.14	chr10	-	3	4.13901	0.018674	0.135669
ENSG00000140403.12	chr15	+	2	5.77557	0.0189219	0.136773
ENSG00000122378.14	chr10	+	2	5.76639	0.0189685	0.136773
ENSG00000172757.13	chr11	-	2	5.7582	0.0190503	0.136848
ENSG00000152061.23	chr1	+	3	4.09273	0.0194914	0.138988
ENSG00000180879.14	chrX	+	2	5.71447	0.0194931	0.138988
ENSG00000110492.16	chr11	+	2	5.67229	0.0199306	0.141581
ENSG00000069667.16	chr15	-	2	5.65432	0.02012	0.142399
ENSG00000165810.17	chr5	+	3	4.02026	0.0208454	0.146223
ENSG00000166710.21	chr15	+	2	5.58393	0.020881	0.146223
ENSG00000004799.8	chr7	-	3	4.01974	0.0208891	0.146223
ENSG00000204257.15	chr6	-	2	5.51855	0.0216239	0.150625
ENSG00000204628.12	chr5	-	5	2.95275	0.0216749	0.150625
ENSG00000165671.21	chr5	+	2	5.49638	0.0218703	0.151434
ENSG00000088899.15	chr20	-	2	5.48765	0.0219716	0.151588
ENSG00000179820.16	chr19	+	2	5.46049	0.0222901	0.153234
ENSG00000127946.17	chr7	-	2	5.43584	0.0225834	0.154696
ENSG00000092068.20	chr14	-	2	5.42147	0.0227562	0.155021
ENSG00000167291.16	chr17	-	2	5.41847	0.0227925	0.155021
ENSG00000164597.15	chr7	-	3	3.91565	0.0229713	0.155373
ENSG00000083845.9	chr19	+	2	5.40089	0.0230063	0.155373
ENSG00000185973.12	chrX	-	2	5.37644	0.023307	0.156594
ENSG00000077522.14	chr1	+	3	3.89803	0.0233503	0.156594
ENSG00000243678.12	chr17	+	2	5.35067	0.0236286	0.157537
ENSG00000144331.20	chr2	-	2	5.34856	0.0236551	0.157537
ENSG00000128272.16	chr22	+	2	5.3322	0.023862	0.158365
ENSG00000119139.21	chr9	+	3	3.869	0.0239892	0.15866
ENSG00000265681.7	chr18	-	2	5.30059	0.0242671	0.159836
ENSG00000123124.14	chr8	+	2	5.29544	0.0243338	0.159836
ENSG00000198959.12	chr20	-	2	5.25857	0.0248169	0.161904
ENSG00000267107.8	chr19	-	3	3.83066	0.0248601	0.161904
ENSG00000186716.21	chr22	+	2	5.25187	0.0249059	0.161904
ENSG00000087460.28	chr20	+	5	2.86379	0.0249862	0.161904
ENSG00000132334.17	chr10	+	3	3.81465	0.0252335	0.162956
ENSG00000143198.13	chr1	+	3	3.80637	0.0254286	0.163665
ENSG00000162496.9	chr1	-	2	5.19778	0.025636	0.164214
ENSG00000172270.22	chr19	+	5	2.84357	0.0258054	0.164214
ENSG00000141013.17	chr16	+	2	5.18479	0.0258146	0.164214
ENSG00000198722.14	chr9	+	2	5.18177	0.0258564	0.164214
ENSG00000203709.12	chr1	-	2	5.14585	0.0263584	0.166849
ENSG00000086848.15	chr11	-	2	5.13002	0.0265829	0.167717
ENSG00000122786.20	chr7	+	4	3.16263	0.0267179	0.167858
ENSG00000185532.20	chr10	+	2	5.11623	0.0267802	0.167858
ENSG00000231500.7	chr6	+	2	5.08816	0.0272306	0.170125
ENSG00000104529.17	chr8	-	2	5.0654	0.0275206	0.17051
ENSG00000133027.18	chr17	-	2	5.06046	0.0275938	0.17051
ENSG00000078114.19	chr10	-	7	2.41695	0.0276357	0.17051
ENSG00000247271.7	chr11	+	2	5.05681	0.0276479	0.17051
ENSG00000138835.22	chr9	+	6	2.56383	0.0283669	0.174005
ENSG00000100316.16	chr22	-	2	5.00717	0.0283959	0.174005
ENSG00000150527.17	chr14	+	2	4.96623	0.0290291	0.177318
ENSG00000171492.14	chr1	+	2	4.95854	0.0291497	0.177489
ENSG00000120690.16	chr13	-	2	4.9074	0.0299652	0.181877
ENSG00000170348.9	chr14	-	2	4.89455	0.030174	0.181881
ENSG00000137767.14	chr15	+	2	4.86499	0.0306601	0.181881
ENSG00000095370.20	chr9	-	3	3.60362	0.0307219	0.181881
ENSG00000196230.14	chr6	+	2	4.8607	0.0307314	0.181881
ENSG00000156113.24	chr10	-	2	4.85581	0.0308127	0.181881
ENSG00000188522.15	chr17	-	2	4.85439	0.0308364	0.181881
ENSG00000169641.13	chr1	-	2	4.85093	0.0308943	0.181881
ENSG00000105697.9	chr19	+	2	4.84753	0.0309511	0.181881
ENSG00000126247.11	chr19	+	3	3.59485	0.0309747	0.181881
ENSG00000163681.16	chr3	+	4	3.04696	0.0309773	0.181881
ENSG00000068383.19	chr10	+	2	4.84329	0.0310222	0.181881
ENSG00000106246.18	chr7	-	2	4.83845	0.0311037	0.181881
ENSG00000106211.10	chr7	+	2	4.82207	0.0313808	0.182786
ENSG00000107104.20	chr9	+	2	4.81303	0.0315349	0.182786
ENSG00000090006.18	chr19	+	3	3.57536	0.0315444	0.182786
ENSG00000239523.6	chr3	+	2	4.79737	0.0318039	0.183734
ENSG00000046653.15	chrX	-	2	4.76365	0.0323911	0.186565
ENSG00000008853.17	chr8	+	3	3.53372	0.0327969	0.188337
ENSG00000271952.2	chr2	+	2	4.73395	0.032918	0.188468
ENSG00000154556.18	chr4	-	7	2.33351	0.0330542	0.188684
ENSG00000127022.16	chr5	+	2	4.70108	0.0335118	0.190729
ENSG00000184347.15	chr5	-	2	4.66413	0.0341928	0.192837
ENSG00000182606.17	chr3	+	2	4.66262	0.0342212	0.192837
ENSG00000075413.19	chr14	+	2	4.66186	0.0342352	0.192837
ENSG00000109452.12	chr4	-	2	4.65923	0.0342843	0.192837
ENSG00000122406.14	chr1	+	2	4.64513	0.034549	0.193757
ENSG00000184702.20	chr22	+	3	3.45842	0.0351925	0.196791
ENSG00000163110.15	chr4	+	3	3.4529	0.035375	0.197103
ENSG00000187098.17	chr3	+	3	3.45053	0.0354539	0.197103
ENSG00000087274.17	chr4	+	3	3.44271	0.0357144	0.197883
ENSG00000105701.16	chr19	-	3	3.44014	0.0358006	0.197883
ENSG00000136560.14	chr2	+	2	4.55788	0.0362356	0.199713
ENSG00000150764.14	chr11	+	3	3.41749	0.0365689	0.200669
ENSG00000114867.22	chr3	+	3	3.41605	0.0366184	0.200669
ENSG00000072062.15	chr19	-	2	4.52239	0.0369466	0.201891
ENSG00000111913.20	chr6	-	2	4.51503	0.0370961	0.202131
ENSG00000065978.19	chr1	+	2	4.50437	0.0373134	0.20274
ENSG00000161955.16	chr17	+	2	4.49842	0.0374354	0.202828
ENSG00000171631.16	chr11	+	3	3.38036	0.0378647	0.204576
ENSG00000011454.18	chr9	+	2	4.46955	0.0380332	0.204909
ENSG00000160209.19	chr21	+	3	3.37053	0.0382156	0.205315
ENSG00000139644.13	chr12	+	2	4.4431	0.0385899	0.206747
ENSG00000186439.14	chr6	-	2	4.41512	0.0391884	0.209368
ENSG00000160710.18	chr1	-	2	4.39634	0.0395956	0.210838
ENSG00000136521.13	chr3	+	2	4.39233	0.0396832	0.210838
ENSG00000174405.14	chr13	-	2	4.38347	0.0398775	0.211284
ENSG00000237773.7	chr7	-	2	4.35768	0.0404486	0.21372
ENSG00000103710.11	chr15	-	2	4.33879	0.0408723	0.215365
ENSG00000171681.12	chr12	+	2	4.33222	0.0410208	0.215556
ENSG00000178127.13	chr18	+	3	3.29069	0.0411909	0.215859
ENSG00000105379.10	chr19	-	2	4.3179	0.0413465	0.216083
ENSG00000027075.15	chr14	+	2	4.30715	0.0415929	0.21678
ENSG00000043143.21	chr5	+	3	3.27368	0.0418548	0.217554
ENSG00000137449.17	chr4	+	2	4.27918	0.0422413	0.21897
ENSG00000161642.18	chr12	-	2	4.27259	0.0423957	0.219178
ENSG00000068831.19	chr11	-	3	3.25355	0.0426548	0.219853
ENSG00000128567.17	chr7	-	2	4.25732	0.0427556	0.219853
ENSG00000166348.19	chr10	-	2	4.23246	0.0433487	0.222307
ENSG00000203880.12	chr20	+	2	4.21322	0.043814	0.223324
ENSG00000101224.18	chr20	+	2	4.20913	0.0439133	0.223324
ENSG00000146147.15	chr6	+	2	4.2077	0.0439482	0.223324
ENSG00000158321.18	chr7	+	3	3.22023	0.0440129	0.223324
ENSG00000177685.17	chr11	+	2	4.16652	0.0449653	0.22745
ENSG00000275832.5	chr17	+	3	3.19517	0.0450631	0.22745
ENSG00000073670.14	chr17	+	2	4.15404	0.0452783	0.227937
ENSG00000175084.12	chr2	+	4	2.74702	0.0454389	0.228146
ENSG00000073849.16	chr3	+	3	3.17735	0.0458256	0.229487
ENSG00000099917.17	chr22	+	3	3.17423	0.0459607	0.229564
ENSG00000072682.20	chr5	-	2	4.1151	0.0462707	0.230081
ENSG00000152689.18	chr2	+	3	3.16632	0.0463042	0.230081
ENSG00000134243.12	chr1	-	3	3.16004	0.0465789	0.230848
ENSG00000184640.20	chr17	+	4	2.72449	0.0467554	0.230916
ENSG00000074416.14	chr3	-	2	4.09281	0.0468495	0.230916
ENSG00000022840.16	chr12	+	3	3.15154	0.0469537	0.230916
ENSG00000167460.17	chr19	+	3	3.14731	0.0471408	0.231243
ENSG00000151067.22	chr12	+	2	4.03251	0.0484542	0.236251
ENSG00000113448.19	chr5	-	2	4.02931	0.0485409	0.236251
ENSG00000110321.19	chr11	-	6	2.27425	0.0486628	0.236251
ENSG00000005022.6	chrX	+	2	4.0227	0.0487208	0.236251
ENSG00000068028.17	chr3	-	2	4.02061	0.0487777	0.236251
ENSG00000170421.12	chr12	-	2	4.00429	0.0492256	0.23782
ENSG00000065427.15	chr16	-	2	3.99391	0.0495124	0.238515
ENSG00000170619.10	chr8	-	2	3.99011	0.0496181	0.238515
ENSG00000138639.18	chr4	+	2	3.98194	0.0498457	0.239009
ENSG00000138061.12	chr2	-	2	3.97979	0.0499702	0.239009
ENSG00000159128.15	chr21	+	2	3.97261	0.0501072	0.239069
ENSG00000091436.17	chr2	+	3	3.07991	0.0502337	0.239078
ENSG00000127603.30	chr1	+	8	2.03898	0.0506519	0.240471
ENSG00000197905.10	chr12	+	2	3.93847	0.0510764	0.241888
ENSG00000104325.7	chr8	+	2	3.92486	0.0514686	0.24231
ENSG00000129084.18	chr11	-	2	3.91782	0.0516725	0.24231
ENSG00000188730.5	chr7	+	2	3.91674	0.051704	0.24231
ENSG00000178209.16	chr8	-	7	2.12155	0.0517542	0.24231
ENSG00000101335.10	chr20	+	3	3.04495	0.051919	0.24231
ENSG00000135218.19	chr7	+	7	2.11998	0.0519237	0.24231
ENSG00000138867.17	chr22	-	2	3.90341	0.0520929	0.24251
ENSG00000136715.19	chr2	-	2	3.89166	0.0524385	0.243255
ENSG00000144579.8	chr2	+	2	3.88936	0.0525066	0.243255
ENSG00000179950.14	chr8	-	2	3.87769	0.0528528	0.244269
ENSG00000134590.14	chrX	+	2	3.87108	0.0530497	0.24459
ENSG00000184752.13	chr12	-	2	3.86493	0.0532341	0.244851
ENSG00000115602.17	chr2	+	2	3.83477	0.0541472	0.248071
ENSG00000130176.8	chr19	+	3	2.99821	0.0543121	0.248071
ENSG00000186111.11	chr19	-	2	3.82906	0.0543221	0.248071
ENSG00000166444.19	chr11	-	3	2.98864	0.0547547	0.249192
ENSG00000128739.23	chr15	+	3	2.98724	0.0548274	0.249192
ENSG00000143799.14	chr1	-	2	3.7966	0.0553273	0.250859
ENSG00000105401.9	chr19	-	2	3.7925	0.0554558	0.250859
ENSG00000160072.20	chr1	+	2	3.77975	0.0558572	0.251815
ENSG00000113758.13	chr5	-	2	3.77124	0.0561268	0.251815
ENSG00000115963.14	chr2	-	2	3.76992	0.0561687	0.251815
ENSG00000176946.12	chr2	-	2	3.76918	0.0561923	0.251815
ENSG00000182667.14	chr11	+	2	3.76287	0.0563933	0.252127
ENSG00000171408.14	chr6	+	2	3.75804	0.0565479	0.25223
ENSG00000116871.15	chr1	+	2	3.75246	0.0567268	0.252441
ENSG00000178951.9	chr19	-	2	3.74652	0.056918	0.252706
ENSG00000159842.15	chr17	-	5	2.33332	0.0578022	0.256039
ENSG00000158158.12	chr2	+	2	3.7104	0.0580963	0.256072
ENSG00000120899.18	chr8	+	2	3.70856	0.058157	0.256072
ENSG00000093144.19	chr6	-	2	3.70695	0.0582103	0.256072
ENSG00000123080.12	chr1	+	2	3.69411	0.0586365	0.257356
ENSG00000230590.11	chrX	-	2	3.66989	0.0594492	0.260328
ENSG00000156508.19	chr6	-	3	2.89636	0.0597487	0.261043
ENSG00000138674.17	chr4	-	2	3.63906	0.060502	0.263346
ENSG00000116044.16	chr2	-	2	3.63766	0.0605503	0.263346
ENSG00000176046.9	chr16	-	2	3.63194	0.060748	0.263496
ENSG00000105409.19	chr19	-	2	3.62712	0.060915	0.263496
ENSG00000027001.10	chr13	-	2	3.62476	0.0609969	0.263496
ENSG00000165629.20	chr10	+	3	2.8701	0.0612528	0.263691
ENSG00000049759.20	chr18	+	2	3.61558	0.0613171	0.263691
ENSG00000245532.9	chr11	+	2	3.59647	0.0619896	0.265987
ENSG00000119640.9	chr14	-	2	3.57974	0.0625847	0.267941
ENSG00000108669.16	chr17	-	3	2.84432	0.0627669	0.268122
ENSG00000224318.6	chr3	-	2	3.55474	0.0634858	0.270591
ENSG00000130822.16	chrX	-	2	3.55062	0.0636358	0.270629
ENSG00000064932.16	chr19	-	3	2.82462	0.0639498	0.271362
ENSG00000203485.14	chr14	+	2	3.53645	0.0641541	0.271628
ENSG00000131143.10	chr16	+	3	2.8146	0.0645601	0.272745
ENSG00000244274.8	chr20	+	3	2.80963	0.0648651	0.273431
ENSG00000177311.11	chr3	+	2	3.49738	0.0656071	0.275214
ENSG00000283154.2	chr3	+	2	3.4952	0.0656894	0.275214
ENSG00000175538.11	chr11	-	2	3.49201	0.0658096	0.275214
ENSG00000137094.15	chr9	+	3	2.79023	0.0660694	0.275214
ENSG00000265107.3	chr1	-	2	3.48696	0.0660695	0.275214
ENSG00000051523.11	chr16	-	2	3.47109	0.0666051	0.275214
ENSG00000131759.18	chr17	+	3	2.7809	0.0666569	0.275214
ENSG00000073536.18	chr17	-	2	3.46883	0.0667607	0.275214
ENSG00000173120.15	chr11	+	2	3.46637	0.0667862	0.275214
ENSG00000171714.12	chr11	+	2	3.46576	0.0668093	0.275214
ENSG00000088387.19	chr13	-	2	3.4608	0.0670003	0.275214
ENSG00000109756.9	chr4	+	5	2.23851	0.06701	0.275214
ENSG00000116667.15	chr1	+	2	3.45672	0.0671578	0.275232
ENSG00000163399.16	chr1	+	2	3.44196	0.0677302	0.276986
ENSG00000101040.19	chr20	-	2	3.43673	0.0679347	0.277232
ENSG00000184840.12	chr5	+	2	3.43106	0.0681566	0.277546
ENSG00000168883.20	chr2	+	2	3.42603	0.0683546	0.277763
ENSG00000135821.19	chr1	-	2	3.41681	0.0687186	0.278652
ENSG00000090924.15	chr19	+	2	3.40646	0.0691296	0.279207
ENSG00000169813.16	chr10	-	3	2.74225	0.0691467	0.279207
ENSG00000106333.13	chr7	+	3	2.73539	0.0695989	0.279964
ENSG00000241837.7	chr21	-	3	2.73277	0.0697717	0.279964
ENSG00000145860.12	chr5	-	2	3.39043	0.0697721	0.279964
ENSG00000146540.15	chr7	-	3	2.72433	0.0703336	0.280885
ENSG00000174851.16	chr11	-	2	3.37456	0.0704141	0.280885
ENSG00000166140.17	chr15	+	2	3.37343	0.0704601	0.280885
ENSG00000107738.20	chr10	-	2	3.37062	0.0705874	0.280885
ENSG00000136895.19	chr9	+	2	3.36487	0.0708094	0.281185
ENSG00000135424.18	chr12	-	2	3.36009	0.0710054	0.281381
ENSG00000109390.13	chr4	-	3	2.71162	0.0711874	0.28152
ENSG00000069275.13	chr1	-	2	3.32523	0.0724523	0.285933
ENSG00000166483.12	chr11	+	2	3.31298	0.0729685	0.287379
ENSG00000132669.14	chr20	+	4	2.362	0.074119	0.291267
ENSG00000198517.10	chr7	+	2	3.28275	0.0742595	0.291267
ENSG00000136108.15	chr13	+	2	3.25986	0.0752534	0.294563
ENSG00000186577.14	chr6	-	2	3.25147	0.0756213	0.294968
ENSG00000134897.14	chr13	+	2	3.2505	0.0756642	0.294968
ENSG00000136699.20	chr2	-	2	3.23982	0.0761358	0.295648
ENSG00000111077.18	chr12	+	3	2.64076	0.0761471	0.295648
ENSG00000119950.21	chr10	+	3	2.63717	0.0764072	0.296024
ENSG00000108946.15	chr17	+	4	2.33501	0.0766958	0.296024
ENSG00000197702.14	chr11	+	3	2.63103	0.0768553	0.296024
ENSG00000172380.6	chr1	-	2	3.22353	0.0768613	0.296024
ENSG00000080824.19	chr14	-	4	2.33124	0.0770631	0.296206
ENSG00000163605.15	chr3	+	3	2.6236	0.0774005	0.296908
ENSG00000062716.13	chr17	+	2	3.20313	0.0777808	0.297772
ENSG00000137075.18	chr9	-	3	2.61445	0.0780771	0.298166
ENSG00000112624.12	chr6	+	2	3.19017	0.0783712	0.298166
ENSG00000168556.7	chr4	+	2	3.18415	0.078647	0.298166
ENSG00000118689.15	chr6	+	2	3.1817	0.0787597	0.298166
ENSG00000143420.19	chr1	-	2	3.181	0.0787919	0.298166
ENSG00000143951.16	chr2	-	3	2.60462	0.0788165	0.298166
ENSG00000165995.22	chr10	+	3	2.60068	0.0791068	0.29849
ENSG00000159403.18	chr12	-	2	3.16893	0.0793493	0.29849
ENSG00000106823.12	chr9	-	2	3.16569	0.0794998	0.29849
ENSG00000225663.8	chr17	-	2	3.16448	0.0795562	0.29849
ENSG00000149131.17	chr11	+	2	3.16181	0.0796804	0.29849
ENSG00000164587.13	chr5	-	3	2.58974	0.0799349	0.29886
ENSG00000168237.18	chr3	+	2	3.14729	0.0803597	0.299863
ENSG00000159348.13	chr1	-	2	3.14025	0.0806917	0.3001
ENSG00000162614.19	chr1	+	3	2.57654	0.0809459	0.3001
ENSG00000141127.15	chr17	+	2	3.13455	0.0809616	0.3001
ENSG00000105855.10	chr7	+	2	3.13271	0.0810488	0.3001
ENSG00000172530.20	chr16	+	2	3.11013	0.0821281	0.30351
ENSG00000127483.19	chr1	-	2	3.08966	0.0831208	0.306261
ENSG00000111245.17	chr12	-	3	2.54794	0.0831918	0.306261
ENSG00000055163.20	chr5	+	2	3.08215	0.0834883	0.306764
ENSG00000142599.19	chr1	-	6	1.97265	0.0842458	0.308955
ENSG00000014641.21	chr2	+	2	3.05848	0.0846578	0.309561
ENSG00000102226.10	chrX	+	2	3.05599	0.0847821	0.309561
ENSG00000167863.12	chr17	-	2	3.05046	0.0850585	0.309561
ENSG00000019144.19	chr11	+	4	2.25186	0.0852018	0.309561
ENSG00000137831.15	chr15	-	2	3.04728	0.085218	0.309561
ENSG00000211448.13	chr14	-	2	3.04393	0.0853859	0.309584
ENSG00000143344.16	chr1	+	2	3.03399	0.0858875	0.310079
ENSG00000158747.15	chr1	+	2	3.03279	0.0859483	0.310079
ENSG00000142541.18	chr19	+	2	3.0194	0.0866293	0.310079
ENSG00000198160.15	chr1	+	2	3.01876	0.0866621	0.310079
ENSG00000185033.14	chr15	+	2	3.0183	0.0866853	0.310079
ENSG00000167522.16	chr16	-	2	3.01658	0.0867733	0.310079
ENSG00000160392.13	chr19	-	2	3.01624	0.0867908	0.310079
ENSG00000173511.10	chr11	+	2	3.01368	0.0869218	0.310079
ENSG00000132849.21	chr1	+	2	3.0126	0.0869773	0.310079
ENSG00000065989.16	chr19	+	2	3.00182	0.0875323	0.311404
ENSG00000224051.7	chr1	+	2	2.99909	0.0876738	0.311404
ENSG00000186815.13	chr12	+	2	2.98865	0.0882158	0.312256
ENSG00000125107.19	chr16	-	2	2.98699	0.0883025	0.312256
ENSG00000188643.11	chr1	-	2	2.98508	0.0884021	0.312256
ENSG00000134504.14	chr18	-	2	2.97958	0.0886899	0.312697
ENSG00000012171.20	chr3	+	2	2.9718	0.0890989	0.313563
ENSG00000018189.13	chr4	+	2	2.96297	0.0895656	0.314628
ENSG00000102316.17	chrX	+	3	2.46665	0.0898847	0.314825
ENSG00000115183.15	chr2	+	2	2.95366	0.0900604	0.314825
ENSG00000113645.15	chr5	+	2	2.95266	0.0901141	0.314825
ENSG00000149823.9	chr11	+	2	2.90531	0.0926803	0.32278
ENSG00000133619.17	chr7	+	2	2.90331	0.0927905	0.32278
ENSG00000140795.13	chr16	-	4	2.18337	0.0928962	0.32278
ENSG00000278311.5	chr17	+	2	2.89807	0.09308	0.322834
ENSG00000275131.3	chr1	-	2	2.89197	0.0934181	0.323422
ENSG00000169155.10	chr9	+	2	2.88306	0.0939146	0.324311
ENSG00000179409.11	chr17	-	2	2.87976	0.094099	0.324311
ENSG00000137843.12	chr15	+	2	2.87828	0.094182	0.324311
ENSG00000073578.17	chr5	+	3	2.41502	0.0944258	0.324568
ENSG00000138413.14	chr2	-	2	2.86932	0.0946854	0.324878
ENSG00000196535.17	chr17	-	2	2.85532	0.0954785	0.327014
ENSG00000185567.7	chr14	-	2	2.84368	0.0961564	0.328749
ENSG00000169925.17	chr9	-	2	2.83857	0.096437	0.329121
ENSG00000132466.19	chr4	-	2	2.83309	0.0967526	0.329205
ENSG00000002933.9	chr7	+	2	2.83037	0.0969103	0.329205
ENSG00000077009.13	chr19	+	3	2.38723	0.0969764	0.329205
ENSG00000076242.16	chr3	+	2	2.81997	0.0975134	0.330443
ENSG00000092841.19	chr12	+	2	2.80908	0.0981506	0.332016
ENSG00000258289.9	chr14	+	2	2.79476	0.0989944	0.334
ENSG00000242282.6	chr2	-	2	2.79322	0.0990856	0.334
ENSG00000136205.17	chr7	-	3	2.35276	0.100214	0.337213
ENSG00000173175.15	chr3	-	3	2.34026	0.10142	0.340671
ENSG00000133835.17	chr5	+	2	2.75037	0.101663	0.340892
ENSG00000163848.20	chr3	-	2	2.73881	0.102372	0.342218
ENSG00000090621.15	chr1	-	2	2.7381	0.102416	0.342218
ENSG00000198668.13	chr14	+	2	2.73189	0.102798	0.342899
ENSG00000130779.22	chr12	-	2	2.72706	0.103097	0.343298
ENSG00000142546.14	chr19	-	2	2.71743	0.103696	0.344515
ENSG00000152700.14	chr5	-	2	2.71471	0.103866	0.344515
ENSG00000111678.11	chr12	+	2	2.71254	0.104001	0.344515
ENSG00000109654.16	chr4	+	2	2.70615	0.104402	0.345247
ENSG00000102547.19	chr13	-	2	2.69586	0.105051	0.346141
ENSG00000111961.18	chr6	+	3	2.30123	0.105278	0.346141
ENSG00000154358.23	chr1	+	3	2.29857	0.105547	0.346141
ENSG00000101019.22	chr20	-	2	2.68696	0.105616	0.346141
ENSG00000162433.15	chr1	+	3	2.29678	0.105728	0.346141
ENSG00000110446.12	chr11	-	2	2.68405	0.105802	0.346141
ENSG00000120742.11	chr3	-	2	2.68164	0.105956	0.346141
ENSG00000167994.13	chr11	-	2	2.67911	0.106118	0.346141
ENSG00000071575.11	chr2	+	2	2.67631	0.106297	0.346141
ENSG00000182732.18	chr14	+	2	2.66885	0.106777	0.347116
ENSG00000117707.16	chr1	+	3	2.27833	0.107611	0.349236
ENSG00000188677.15	chr22	+	2	2.64624	0.108245	0.350701
ENSG00000124749.17	chr6	-	2	2.63644	0.108889	0.352191
ENSG00000121933.19	chr1	-	3	2.25868	0.109655	0.354073
ENSG00000075292.19	chr2	+	2	2.61142	0.110552	0.356367
ENSG00000173406.16	chr1	-	2	2.58942	0.112037	0.359082
ENSG00000004478.8	chr12	+	2	2.58853	0.112098	0.359082
ENSG00000119403.15	chr9	-	2	2.58791	0.11214	0.359082
ENSG00000075391.17	chr1	+	2	2.58787	0.112143	0.359082
ENSG00000103043.15	chr16	-	2	2.56574	0.113661	0.362432
ENSG00000109572.14	chr4	+	2	2.56512	0.113704	0.362432
ENSG00000128789.21	chr18	+	2	2.56438	0.113756	0.362432
ENSG00000203879.12	chrX	+	3	2.217	0.114124	0.36263
ENSG00000115461.5	chr2	-	2	2.55385	0.114487	0.36263
ENSG00000119707.14	chr14	+	2	2.55162	0.114643	0.36263
ENSG00000204267.16	chr6	-	2	2.55057	0.114716	0.36263
ENSG00000177565.18	chr3	-	2	2.54989	0.114764	0.36263
ENSG00000120278.16	chr6	+	2	2.54657	0.114996	0.362766
ENSG00000176728.10	chrY	-	2	2.53924	0.115511	0.363503
ENSG00000008294.21	chr17	-	2	2.53785	0.115608	0.363503
ENSG00000077092.19	chr3	+	2	2.52944	0.116203	0.364177
ENSG00000117984.15	chr11	-	2	2.52687	0.116385	0.364177
ENSG00000080854.16	chr11	-	2	2.52677	0.116392	0.364177
ENSG00000101871.16	chrX	-	2	2.51986	0.116884	0.364736
ENSG00000103034.14	chr16	+	4	1.99934	0.117089	0.364736
ENSG00000166272.18	chr10	+	2	2.51626	0.117141	0.364736
ENSG00000072518.22	chr11	+	2	2.50612	0.117869	0.366362
ENSG00000165458.14	chr11	+	2	2.50367	0.118046	0.366362
ENSG00000242125.3	chr1	+	2	2.49235	0.118866	0.368312
ENSG00000175505.11	chr11	-	2	2.48946	0.119076	0.368368
ENSG00000165868.16	chr10	-	2	2.47426	0.120189	0.371213
ENSG00000170525.21	chr10	+	3	2.1569	0.120896	0.37254
ENSG00000167815.12	chr19	-	2	2.46294	0.121026	0.37254
ENSG00000130985.17	chrX	+	2	2.457	0.121468	0.37254
ENSG00000129353.15	chr19	+	2	2.45626	0.121524	0.37254
ENSG00000078808.19	chr1	-	2	2.45536	0.12159	0.37254
ENSG00000130528.12	chr19	-	2	2.4514	0.121887	0.372853
ENSG00000180628.15	chr10	+	2	2.448	0.122141	0.373036
ENSG00000116857.17	chr1	-	2	2.43597	0.123047	0.375205
ENSG00000178096.9	chr1	+	2	2.43174	0.123367	0.375584
ENSG00000101333.18	chr20	+	2	2.42892	0.123581	0.37564
ENSG00000146701.12	chr7	+	2	2.41077	0.124969	0.379258
ENSG00000151726.15	chr4	-	3	2.11752	0.125555	0.380433
ENSG00000079435.10	chr19	-	2	2.39649	0.126087	0.381444
ENSG00000147573.17	chr8	+	2	2.39339	0.126315	0.381531
ENSG00000113648.16	chr5	-	2	2.38738	0.126784	0.381709
ENSG00000138757.15	chr4	-	2	2.38536	0.126943	0.381709
ENSG00000075420.13	chr3	+	2	2.385	0.126971	0.381709
ENSG00000108306.13	chr17	-	2	2.37435	0.127808	0.383623
ENSG00000166913.13	chr20	+	2	2.36842	0.128277	0.38443
ENSG00000012223.13	chr3	-	2	2.34605	0.130064	0.388568
ENSG00000129675.16	chrX	-	2	2.34279	0.130327	0.388568
ENSG00000134371.14	chr1	+	2	2.34145	0.130436	0.388568
ENSG00000141562.18	chr17	+	2	2.34068	0.130498	0.388568
ENSG00000169519.21	chr11	+	2	2.33835	0.130686	0.388568
ENSG00000102781.14	chr13	-	2	2.33604	0.130873	0.388568
ENSG00000006194.10	chr16	+	2	2.32574	0.131712	0.389801
ENSG00000167680.17	chr19	-	2	2.32507	0.131767	0.389801
ENSG00000068305.17	chr15	+	2	2.32021	0.132164	0.389801
ENSG00000232310.8	chr6	-	2	2.31683	0.132442	0.389801
ENSG00000124535.16	chr6	+	2	2.31585	0.132522	0.389801
ENSG00000105643.10	chr19	+	3	2.06064	0.132608	0.389801
ENSG00000101191.17	chr20	-	2	2.31356	0.132711	0.389801
ENSG00000236714.3	chr5	+	2	2.29515	0.134251	0.393546
ENSG00000151835.16	chr13	-	2	2.29325	0.134397	0.393546
ENSG00000168264.11	chr1	-	2	2.28856	0.134789	0.393712
ENSG00000105707.15	chr19	+	2	2.28767	0.134864	0.393712
ENSG00000116132.12	chr1	+	3	2.0399	0.135278	0.394322
ENSG00000110077.14	chr11	-	2	2.27748	0.135723	0.395017
ENSG00000100664.11	chr14	+	2	2.27393	0.136023	0.395292
ENSG00000134871.19	chr13	+	2	2.2662	0.13668	0.396598
ENSG00000100243.21	chr22	-	2	2.25001	0.138067	0.400019
ENSG00000101161.8	chr20	+	2	2.24014	0.138921	0.400802
ENSG00000186352.9	chr4	+	2	2.23974	0.138956	0.400802
ENSG00000174891.13	chr3	+	2	2.2382	0.13909	0.400802
ENSG00000134884.15	chr13	-	2	2.23724	0.139173	0.400802
ENSG00000182154.8	chr9	+	2	2.22238	0.140473	0.403426
ENSG00000188549.12	chr15	-	2	2.22057	0.140632	0.403426
ENSG00000158417.11	chr2	+	2	2.21569	0.141062	0.403426
ENSG00000219626.9	chr2	+	2	2.21463	0.141156	0.403426
ENSG00000120549.18	chr10	+	2	2.21296	0.141304	0.403426
ENSG00000158856.18	chr8	+	4	1.84875	0.141346	0.403426
ENSG00000173451.7	chr12	+	2	2.20735	0.141801	0.404123
ENSG00000235927.4	chr1	-	2	2.20238	0.142244	0.404783
ENSG00000173372.17	chr1	+	2	2.18896	0.143446	0.405693
ENSG00000205189.12	chr8	+	2	2.18892	0.14345	0.405693
ENSG00000117616.18	chr1	-	2	2.18807	0.143526	0.405693
ENSG00000198270.13	chr12	-	2	2.18785	0.143547	0.405693
ENSG00000077157.22	chr1	+	2	2.18702	0.143621	0.405693
ENSG00000145730.20	chr5	+	6	1.66765	0.144042	0.406283
ENSG00000151276.23	chr3	-	2	2.16987	0.145178	0.408885
ENSG00000102678.7	chr13	+	2	2.16634	0.1455	0.409192
ENSG00000139146.14	chr12	-	2	2.15901	0.146173	0.410482
ENSG00000081189.16	chr5	-	2	2.15448	0.146591	0.410699
ENSG00000177628.16	chr1	-	2	2.15353	0.146678	0.410699
ENSG00000132530.17	chr17	+	2	2.14369	0.147591	0.412509
ENSG00000106070.20	chr7	-	2	2.14193	0.147755	0.412509
ENSG00000147255.19	chrX	-	2	2.13622	0.148288	0.413116
ENSG00000075131.10	chr15	-	2	2.13499	0.148403	0.413116
ENSG00000172824.16	chr16	+	2	2.12809	0.14905	0.414142
ENSG00000120729.10	chr5	+	2	2.12665	0.149259	0.414142
ENSG00000108823.16	chr17	+	2	2.12418	0.149419	0.414142
ENSG00000052126.15	chr12	+	2	2.11165	0.150607	0.416831
ENSG00000285938.1	chr3	+	2	2.10275	0.151457	0.418581
ENSG00000187288.12	chr3	-	2	2.09532	0.152245	0.419515
ENSG00000122643.22	chr7	-	2	2.09421	0.152279	0.419515
ENSG00000204256.14	chr6	+	3	1.91454	0.152635	0.419515
ENSG00000136261.15	chr7	+	2	2.0853	0.153141	0.419515
ENSG00000069122.19	chr6	-	2	2.08424	0.153244	0.419515
ENSG00000110422.12	chr11	+	2	2.08333	0.153332	0.419515
ENSG00000104881.16	chr19	-	2	2.07885	0.153768	0.419515
ENSG00000143179.16	chr1	+	2	2.07863	0.15379	0.419515
ENSG00000170892.13	chr19	+	2	2.07859	0.153794	0.419515
ENSG00000166451.14	chr16	+	2	2.07666	0.153983	0.419515
ENSG00000205220.12	chr16	-	2	2.07284	0.154356	0.419937
ENSG00000169045.17	chr5	-	2	2.06263	0.155361	0.422071
ENSG00000169926.11	chr15	+	2	2.05803	0.155816	0.422708
ENSG00000128918.15	chr15	-	2	2.04523	0.157089	0.425561
ENSG00000099991.18	chr22	+	2	2.03537	0.158079	0.427638
ENSG00000104967.8	chr19	-	2	2.02968	0.158653	0.428024
ENSG00000109016.17	chr17	+	2	2.02954	0.158668	0.428024
ENSG00000123636.18	chr2	-	2	2.02181	0.159451	0.428306
ENSG00000204843.13	chr2	-	3	1.86804	0.159635	0.428306
ENSG00000180155.20	chr8	-	2	2.01904	0.159734	0.428306
ENSG00000182196.13	chr12	+	2	2.01882	0.159756	0.428306
ENSG00000163964.18	chr3	+	2	2.01752	0.159889	0.428306
ENSG00000134326.12	chr2	-	2	1.99826	0.161869	0.43232
ENSG00000173402.12	chr3	+	2	1.99632	0.16207	0.43232
ENSG00000268858.2	chr20	-	2	1.99335	0.162378	0.43232
ENSG00000179222.18	chrX	+	2	1.98935	0.162795	0.43232
ENSG00000143153.13	chr1	+	2	1.98603	0.163141	0.43232
ENSG00000176209.12	chr8	+	2	1.98495	0.163254	0.43232
ENSG00000020577.14	chr14	+	5	1.653	0.163354	0.43232
ENSG00000055609.20	chr7	-	2	1.98271	0.163488	0.43232
ENSG00000181722.17	chr3	-	3	1.84264	0.163598	0.43232
ENSG00000172262.11	chr5	+	3	1.84095	0.163865	0.43232
ENSG00000173221.14	chr5	-	2	1.9791	0.163867	0.43232
ENSG00000131828.14	chrX	+	2	1.97335	0.164472	0.433322
ENSG00000047315.17	chr4	+	2	1.96858	0.164977	0.434054
ENSG00000196136.18	chr14	+	2	1.96326	0.165541	0.434941
ENSG00000105426.17	chr19	-	4	1.71744	0.166397	0.436592
ENSG00000165119.21	chr9	-	2	1.94734	0.167243	0.437806
ENSG00000149187.18	chr11	-	2	1.94346	0.16766	0.437806
ENSG00000166484.20	chr17	+	2	1.94314	0.167694	0.437806
ENSG00000105202.9	chr19	-	2	1.94064	0.167965	0.437806
ENSG00000133460.19	chr22	+	2	1.93938	0.168101	0.437806
ENSG00000124225.16	chr20	-	2	1.9369	0.16837	0.437806
ENSG00000282221.1	chr1	+	2	1.93321	0.168771	0.437806
ENSG00000101665.9	chr18	-	2	1.93287	0.168807	0.437806
ENSG00000112576.13	chr6	-	2	1.93189	0.168913	0.437806
ENSG00000141012.13	chr16	-	2	1.9208	0.170126	0.439636
ENSG00000049323.16	chr2	+	2	1.91937	0.170282	0.439636
ENSG00000149809.17	chr11	+	2	1.91914	0.170307	0.439636
ENSG00000153048.11	chr16	-	2	1.91441	0.170828	0.440312
ENSG00000164951.16	chr8	+	2	1.9126	0.171028	0.440312
ENSG00000138326.21	chr10	+	2	1.90011	0.172414	0.443274
ENSG00000145819.18	chr5	+	2	1.89442	0.173049	0.443274
ENSG00000196498.13	chr12	-	4	1.68499	0.173214	0.443274
ENSG00000178860.9	chr8	-	2	1.89211	0.173308	0.443274
ENSG00000058262.10	chr3	+	2	1.89187	0.173335	0.443274
ENSG00000076864.19	chr1	-	2	1.88561	0.174038	0.444218
ENSG00000072778.20	chr17	+	4	1.68055	0.174167	0.444218
ENSG00000205268.11	chr8	-	2	1.87436	0.175311	0.446543
ENSG00000114126.18	chr3	-	3	1.7626	0.176749	0.448658
ENSG00000108387.15	chr17	-	3	1.76252	0.176764	0.448658
ENSG00000131788.16	chr1	-	2	1.86012	0.176939	0.448658
ENSG00000068745.15	chr3	-	3	1.75955	0.177272	0.448658
ENSG00000154710.18	chr7	+	2	1.85688	0.177311	0.448658
ENSG00000160877.6	chr19	+	2	1.84826	0.178307	0.450452
ENSG00000126709.16	chr1	-	2	1.84675	0.17849	0.450452
ENSG00000148339.12	chr9	+	2	1.84408	0.178793	0.450623
ENSG00000088682.14	chr16	+	2	1.83549	0.179795	0.452556
ENSG00000156802.13	chr8	-	2	1.83301	0.180086	0.452693
ENSG00000077684.16	chr4	+	2	1.82779	0.180699	0.453131
ENSG00000196712.18	chr17	+	2	1.82751	0.180733	0.453131
ENSG00000085276.19	chr3	-	3	1.73762	0.181071	0.453387
ENSG00000205133.12	chr8	-	2	1.81519	0.18219	0.454965
ENSG00000017797.13	chr18	+	2	1.81398	0.182334	0.454965
ENSG00000155755.19	chr2	-	2	1.81332	0.182413	0.454965
ENSG00000166228.9	chr10	-	2	1.79698	0.184371	0.458428
ENSG00000170989.10	chr1	+	2	1.79622	0.184462	0.458428
ENSG00000100897.18	chr14	+	2	1.79524	0.18458	0.458428
ENSG00000122550.18	chr7	+	2	1.79313	0.184836	0.458428
ENSG00000117419.16	chr1	-	2	1.78972	0.185249	0.458428
ENSG00000204922.5	chr11	+	2	1.78824	0.185428	0.458428
ENSG00000166965.12	chr15	+	2	1.7873	0.185542	0.458428
ENSG00000135636.14	chr2	+	2	1.78589	0.185714	0.458428
ENSG00000134201.12	chr1	+	2	1.78196	0.186192	0.458492
ENSG00000092929.12	chr17	-	2	1.78176	0.186218	0.458492
ENSG00000135956.9	chr2	-	2	1.77931	0.186516	0.458639
ENSG00000275915.1	chr1	+	2	1.77011	0.187645	0.460823
ENSG00000215252.11	chr15	-	2	1.7531	0.189753	0.465405
ENSG00000114993.17	chr2	-	2	1.74939	0.190218	0.465948
ENSG00000141905.19	chr19	+	7	1.46622	0.190669	0.466457
ENSG00000120071.15	chr17	-	2	1.73932	0.191494	0.46788
ENSG00000102125.16	chrX	+	2	1.73416	0.192135	0.468847
ENSG00000104824.18	chr19	-	2	1.72951	0.192724	0.469687
ENSG00000137962.13	chr1	-	2	1.72349	0.193491	0.47096
ENSG00000177119.17	chr12	+	2	1.70746	0.19555	0.474573
ENSG00000116774.12	chr1	+	2	1.70678	0.195639	0.474573
ENSG00000147862.17	chr9	-	2	1.7058	0.195766	0.474573
ENSG00000133401.16	chr5	+	2	1.7034	0.196076	0.474573
ENSG00000176490.5	chr19	-	2	1.70235	0.196213	0.474573
ENSG00000150995.20	chr3	+	2	1.69028	0.197787	0.477238
ENSG00000153250.20	chr2	-	3	1.64628	0.197812	0.477238
ENSG00000176978.14	chr9	-	2	1.6875	0.198152	0.477456
ENSG00000139323.14	chr12	-	2	1.68046	0.19908	0.479079
ENSG00000114541.15	chr3	-	5	1.51667	0.199566	0.479079
ENSG00000173638.19	chr21	-	2	1.67659	0.199591	0.479079
ENSG00000039523.20	chr16	+	2	1.67165	0.200248	0.479079
ENSG00000138594.14	chr15	+	2	1.67052	0.200398	0.479079
ENSG00000138347.16	chr10	+	2	1.66983	0.20049	0.479079
ENSG00000162591.16	chr1	-	2	1.6692	0.200574	0.479079
ENSG00000123143.13	chr19	+	2	1.66647	0.200939	0.479354
ENSG00000149091.15	chr11	+	4	1.55994	0.202061	0.480293
ENSG00000255399.4	chr12	+	2	1.65718	0.202184	0.480293
ENSG00000168385.18	chr2	+	2	1.65621	0.202314	0.480293
ENSG00000223969.6	chr7	-	2	1.65549	0.202412	0.480293
ENSG00000219607.4	chr6	+	2	1.65178	0.202912	0.480293
ENSG00000041880.15	chr3	+	2	1.65092	0.203029	0.480293
ENSG00000130304.17	chr19	+	2	1.64679	0.203588	0.480293
ENSG00000070778.13	chr14	-	2	1.64475	0.203864	0.480293
ENSG00000246273.8	chr11	+	2	1.64219	0.204213	0.480293
ENSG00000124588.22	chr6	+	2	1.64059	0.204432	0.480293
ENSG00000179833.4	chr2	-	2	1.64028	0.204473	0.480293
ENSG00000081923.15	chr18	-	2	1.63989	0.204527	0.480293
ENSG00000141068.14	chr17	+	2	1.63944	0.204588	0.480293
ENSG00000137573.14	chr8	+	2	1.62831	0.206114	0.483189
ENSG00000178980.15	chr19	+	2	1.62408	0.206697	0.483189
ENSG00000198125.13	chr22	-	5	1.49244	0.206716	0.483189
ENSG00000182534.13	chr17	-	3	1.59978	0.206932	0.483189
ENSG00000137501.17	chr11	-	2	1.61964	0.207313	0.483189
ENSG00000113140.11	chr5	-	2	1.61949	0.207333	0.483189
ENSG00000259498.1	chr15	-	2	1.61597	0.207822	0.483288
ENSG00000104872.11	chr19	-	2	1.61556	0.207879	0.483288
ENSG00000156030.13	chr14	-	2	1.6089	0.208808	0.484859
ENSG00000150401.15	chr13	-	2	1.59669	0.210525	0.486981
ENSG00000234520.6	chr7	-	2	1.59653	0.21056	0.486981
ENSG00000137486.17	chr11	-	2	1.5953	0.210721	0.486981
ENSG00000082458.12	chrX	+	3	1.58057	0.210825	0.486981
ENSG00000089157.16	chr12	-	2	1.59169	0.211233	0.486981
ENSG00000077150.20	chr10	+	2	1.5916	0.211245	0.486981
ENSG00000122644.13	chr7	+	2	1.58905	0.211608	0.487199
ENSG00000182022.18	chr10	-	2	1.58736	0.211848	0.487199
ENSG00000130522.6	chr19	-	2	1.58546	0.212131	0.487265
ENSG00000106617.15	chr7	-	4	1.51709	0.212953	0.488539
ENSG00000204590.12	chr6	-	2	1.57672	0.213369	0.488539
ENSG00000118263.15	chr2	-	2	1.57616	0.213449	0.488539
ENSG00000156299.13	chr21	-	2	1.57426	0.213722	0.488581
ENSG00000130940.15	chr1	-	2	1.57171	0.21409	0.488839
ENSG00000115365.12	chr2	-	2	1.56484	0.215083	0.490522
ENSG00000105323.17	chr19	+	2	1.54999	0.217249	0.494321
ENSG00000153904.21	chr1	-	2	1.54952	0.21733	0.494321
ENSG00000117114.20	chr1	+	3	1.54834	0.217522	0.494321
ENSG00000136603.14	chr3	+	2	1.54482	0.218008	0.494841
ENSG00000123600.20	chr2	-	2	1.53593	0.219324	0.497238
ENSG00000183072.10	chr5	-	2	1.53274	0.219798	0.497725
ENSG00000117399.14	chr1	+	2	1.52468	0.221001	0.499859
ENSG00000152894.15	chr6	-	2	1.51771	0.222049	0.501637
ENSG00000262660.1	chr17	+	2	1.51037	0.223158	0.503551
ENSG00000185825.17	chrX	-	2	1.50779	0.223549	0.50384
ENSG00000142156.15	chr21	+	2	1.50557	0.223887	0.504008
ENSG00000245060.8	chr5	+	2	1.50143	0.224518	0.504748
ENSG00000135250.17	chr7	-	3	1.51472	0.224742	0.504748
ENSG00000112759.19	chr6	+	4	1.47042	0.225446	0.505737
ENSG00000130600.19	chr11	-	3	1.50569	0.226721	0.508003
ENSG00000135631.17	chr2	-	2	1.48016	0.227797	0.509697
ENSG00000172493.22	chr4	+	3	1.49913	0.228171	0.509697
ENSG00000168273.8	chr3	+	2	1.47709	0.228274	0.509697
ENSG00000184939.16	chr16	+	2	1.46699	0.229855	0.512631
ENSG00000187239.17	chr9	-	2	1.46124	0.230761	0.514053
ENSG00000181409.14	chr17	-	2	1.45701	0.23143	0.514745
ENSG00000105483.18	chr19	-	2	1.45589	0.231609	0.514745
ENSG00000100242.15	chr22	-	3	1.47959	0.232544	0.515669
ENSG00000284969.1	chr11	-	2	1.44956	0.232615	0.515669
ENSG00000133121.21	chr13	-	3	1.47776	0.232959	0.515669
ENSG00000102804.15	chr13	-	4	1.44301	0.2331	0.515669
ENSG00000173264.15	chr11	+	2	1.44224	0.233787	0.516594
ENSG00000152601.17	chr3	+	2	1.4312	0.235566	0.518912
ENSG00000142173.16	chr21	+	4	1.43417	0.235619	0.518912
ENSG00000068308.14	chrX	-	2	1.4307	0.235648	0.518912
ENSG00000137070.18	chr9	+	2	1.41518	0.23818	0.523886
ENSG00000162909.18	chr1	+	2	1.4109	0.238884	0.524833
ENSG00000023191.17	chr11	-	3	1.45011	0.239306	0.525159
ENSG00000122986.14	chr12	-	2	1.4031	0.240172	0.526457
ENSG00000185215.11	chr14	+	2	1.40013	0.240666	0.526843
ENSG00000129521.15	chr14	-	2	1.39844	0.240948	0.526843
ENSG00000104763.20	chr8	-	7	1.3378	0.241172	0.526843
ENSG00000226742.4	chr18	+	2	1.39419	0.241658	0.527176
ENSG00000224861.1	chr14	-	2	1.39289	0.241874	0.527176
ENSG00000135447.17	chr12	-	2	1.39013	0.242337	0.527584
ENSG00000008441.18	chr19	+	2	1.38225	0.243663	0.52987
ENSG00000186260.17	chr16	+	3	1.43031	0.243961	0.529917
ENSG00000093072.18	chr22	-	2	1.37856	0.244288	0.530028
ENSG00000196576.16	chr22	-	2	1.37681	0.244584	0.53007
ENSG00000143337.19	chr1	+	2	1.37156	0.245476	0.531404
ENSG00000181031.16	chr17	-	2	1.36908	0.2459	0.531721
ENSG00000167641.11	chr19	-	2	1.36239	0.247046	0.533301
ENSG00000167705.12	chr17	-	2	1.36056	0.247361	0.533301
ENSG00000105438.9	chr19	-	2	1.35996	0.247465	0.533301
ENSG00000101752.12	chr18	+	3	1.41135	0.248504	0.534938
ENSG00000179335.19	chr15	+	2	1.34816	0.249506	0.536495
ENSG00000131981.16	chr14	+	3	1.4041	0.250264	0.536945
ENSG00000100412.17	chr22	+	2	1.34374	0.250276	0.536945
ENSG00000148396.18	chr9	-	2	1.33291	0.252177	0.540128
ENSG00000166313.19	chr11	-	2	1.33208	0.252323	0.540128
ENSG00000177830.18	chr11	-	2	1.32987	0.252713	0.540361
ENSG00000166326.7	chr11	+	2	1.32565	0.25346	0.541354
ENSG00000118900.15	chr16	+	2	1.32083	0.254317	0.542581
ENSG00000161203.13	chr3	+	2	1.3129	0.255734	0.544998
ENSG00000144711.16	chr3	-	3	1.3791	0.256429	0.545873
ENSG00000099204.20	chr10	-	5	1.33716	0.25825	0.549139
ENSG00000272391.6	chr7	-	2	1.2929	0.259355	0.549658
ENSG00000107317.13	chr9	+	3	1.36703	0.25947	0.549658
ENSG00000187778.14	chr12	-	2	1.2918	0.259554	0.549658
ENSG00000114738.11	chr3	+	2	1.29133	0.25964	0.549658
ENSG00000065054.14	chr16	+	3	1.36388	0.260259	0.550361
ENSG00000277443.3	chr6	+	2	1.2841	0.260968	0.551251
ENSG00000055118.16	chr7	-	2	1.28022	0.261682	0.552151
ENSG00000273899.5	chr22	+	2	1.27865	0.261972	0.552157
ENSG00000108622.11	chr17	-	2	1.27406	0.262823	0.553343
ENSG00000136758.19	chr10	-	2	1.26801	0.26395	0.555105
ENSG00000060982.15	chr12	-	2	1.26576	0.264369	0.555377
ENSG00000130529.16	chr19	+	2	1.2607	0.265319	0.556763
ENSG00000236404.10	chr9	-	3	1.33405	0.267935	0.561624
ENSG00000104853.16	chr19	+	2	1.24348	0.268579	0.561624
ENSG00000181666.18	chr19	+	2	1.24232	0.2688	0.561624
ENSG00000122417.15	chr1	-	2	1.24202	0.268856	0.561624
ENSG00000177666.17	chr11	+	2	1.24013	0.269218	0.561624
ENSG00000175699.15	chr14	+	2	1.2382	0.269589	0.561624
ENSG00000107968.10	chr10	+	2	1.2377	0.269685	0.561624
ENSG00000267577.1	chr19	+	2	1.23488	0.270238	0.561804
ENSG00000065882.16	chr4	+	2	1.2342	0.270357	0.561804
ENSG00000177200.17	chr16	+	4	1.3177	0.271282	0.563116
ENSG00000136574.18	chr8	+	3	1.31971	0.271706	0.563386
ENSG00000040341.18	chr8	-	2	1.21946	0.273211	0.565895
ENSG00000172009.15	chr19	+	2	1.21724	0.273645	0.566183
ENSG00000107796.13	chr10	-	2	1.21309	0.274457	0.56725
ENSG00000079999.14	chr19	-	2	1.20679	0.275696	0.569198
ENSG00000213160.10	chr2	+	2	1.2035	0.276347	0.569929
ENSG00000082293.13	chr6	+	2	1.19981	0.277078	0.570015
ENSG00000223695.1	chr22	+	2	1.19974	0.277092	0.570015
ENSG00000012061.16	chr19	-	5	1.28668	0.27728	0.570015
ENSG00000179010.15	chr4	+	2	1.19318	0.278398	0.571194
ENSG00000152556.17	chr12	+	5	1.28367	0.27845	0.571194
ENSG00000132510.11	chr17	+	3	1.29319	0.278825	0.571353
ENSG00000162670.11	chr1	-	2	1.18725	0.279585	0.571843
ENSG00000198728.11	chr10	-	2	1.18555	0.279927	0.571843
ENSG00000102786.15	chr13	-	2	1.1854	0.279958	0.571843
ENSG00000135390.21	chr12	-	3	1.28595	0.280802	0.572654
ENSG00000198853.12	chr9	+	2	1.18047	0.280953	0.572654
ENSG00000198467.16	chr9	-	4	1.28625	0.281736	0.573642
ENSG00000112419.14	chr6	+	2	1.17212	0.282645	0.574248
ENSG00000143353.12	chr1	+	2	1.17105	0.282864	0.574248
ENSG00000048540.15	chr12	-	2	1.17071	0.282933	0.574248
ENSG00000179632.10	chr8	+	2	1.16868	0.283347	0.574295
ENSG00000226306.6	chr5	+	2	1.16767	0.283555	0.574295
ENSG00000177885.15	chr17	-	2	1.16404	0.284297	0.575192
ENSG00000133142.18	chrX	+	2	1.15906	0.285322	0.576657
ENSG00000110911.17	chr12	-	2	1.15571	0.286012	0.577443
ENSG00000143774.17	chr1	+	3	1.26528	0.286521	0.577862
ENSG00000232119.8	chrX	+	2	1.14951	0.287299	0.578209
ENSG00000156709.15	chrX	-	3	1.26173	0.287515	0.578209
ENSG00000132478.10	chr17	+	2	1.14808	0.287597	0.578209
ENSG00000105227.16	chr19	-	2	1.14518	0.288202	0.578818
ENSG00000196507.11	chrX	+	2	1.14256	0.288749	0.57913
ENSG00000108924.14	chr17	+	3	1.25562	0.289235	0.57913
ENSG00000138772.13	chr4	+	2	1.14011	0.289263	0.57913
ENSG00000213145.10	chr14	+	2	1.13637	0.290049	0.57972
ENSG00000196914.9	chr11	+	2	1.13583	0.290162	0.57972
ENSG00000204138.13	chr1	+	2	1.13364	0.290624	0.580039
ENSG00000166317.12	chr10	-	2	1.1308	0.291224	0.580632
ENSG00000011465.18	chr12	-	5	1.24987	0.291907	0.580845
ENSG00000173272.16	chr2	-	2	1.12744	0.291937	0.580845
ENSG00000100106.22	chr22	+	2	1.12243	0.293003	0.582362
ENSG00000250722.6	chr5	-	2	1.11561	0.294462	0.584656
ENSG00000132329.11	chr2	+	2	1.11021	0.295626	0.58636
ENSG00000145592.14	chr5	-	2	1.10448	0.296875	0.588019
ENSG00000131089.17	chrX	-	3	1.22688	0.297466	0.588019
ENSG00000274104.1	chr19	-	2	1.10117	0.297583	0.588019
ENSG00000196628.20	chr18	-	6	1.22722	0.297689	0.588019
ENSG00000145703.16	chr5	+	2	1.09745	0.298395	0.588808
ENSG00000110047.18	chr11	-	2	1.09599	0.298714	0.588832
ENSG00000203739.4	chr1	-	2	1.08932	0.300179	0.589349
ENSG00000163520.14	chr3	+	2	1.08795	0.30048	0.589349
ENSG00000107771.17	chr10	+	2	1.08646	0.300808	0.589349
ENSG00000183955.13	chr12	+	2	1.08578	0.30096	0.589349
ENSG00000179818.14	chr2	-	2	1.08516	0.301096	0.589349
ENSG00000102265.12	chrX	+	3	1.21378	0.301305	0.589349
ENSG00000183023.18	chr2	-	3	1.21308	0.301505	0.589349
ENSG00000132153.15	chr3	+	2	1.08232	0.301725	0.589349
ENSG00000198521.12	chr19	-	2	1.08155	0.301895	0.589349
ENSG00000142937.12	chr1	+	2	1.08086	0.302049	0.589349
ENSG00000105204.14	chr19	-	2	1.0763	0.303062	0.5897
ENSG00000160014.17	chr19	+	2	1.07519	0.30331	0.5897
ENSG00000112837.17	chr6	-	2	1.0747	0.303421	0.5897
ENSG00000235109.7	chr6	-	2	1.07453	0.303459	0.5897
ENSG00000198393.8	chr12	+	2	1.0713	0.30418	0.590503
ENSG00000093167.18	chr3	-	2	1.06815	0.304887	0.591278
ENSG00000137497.18	chr11	-	4	1.21599	0.306434	0.593646
ENSG00000008256.16	chr7	-	2	1.05999	0.306727	0.593646
ENSG00000130255.13	chr19	+	2	1.04668	0.309762	0.598914
ENSG00000179094.16	chr17	-	2	1.04346	0.310503	0.599742
ENSG00000166068.13	chr15	+	2	1.03804	0.311752	0.601257
ENSG00000168003.18	chr11	+	2	1.03734	0.311914	0.601257
ENSG00000172831.14	chr16	+	2	1.03594	0.312238	0.601278
ENSG00000014216.16	chr11	+	2	1.03086	0.313419	0.602947
ENSG00000187773.9	chr18	-	2	1.02872	0.313928	0.603102
ENSG00000166292.12	chr17	-	2	1.02782	0.314129	0.603102
ENSG00000150347.17	chr10	+	2	1.02014	0.31593	0.605954
ENSG00000148120.17	chr9	+	3	1.16371	0.316411	0.60627
ENSG00000196141.14	chr2	+	2	1.01438	0.317291	0.606558
ENSG00000164054.15	chr3	-	2	1.01367	0.317459	0.606558
ENSG00000197879.17	chr17	-	3	1.15902	0.317864	0.606558
ENSG00000105576.15	chr19	-	3	1.1584	0.318056	0.606558
ENSG00000127084.19	chr9	+	2	1.01017	0.318291	0.606558
ENSG00000155324.10	chr5	+	2	1.00946	0.318459	0.606558
ENSG00000132205.11	chr18	+	2	1.00727	0.31898	0.606949
ENSG00000177169.10	chr12	+	2	1.00499	0.319526	0.607385
ENSG00000075234.17	chr22	+	2	1.00128	0.320415	0.60847
ENSG00000205560.13	chr22	-	2	0.999863	0.320755	0.608514
ENSG00000178188.14	chr16	+	2	0.993319	0.322332	0.610903
ENSG00000051620.11	chr6	+	2	0.987376	0.323774	0.613029
ENSG00000108654.16	chr17	-	4	1.1677	0.32453	0.613855
ENSG00000101997.13	chrX	+	2	0.97868	0.325899	0.615837
ENSG00000104964.15	chr19	-	2	0.96862	0.328382	0.619917
ENSG00000118473.22	chr1	+	2	0.967041	0.328773	0.620047
ENSG00000277791.5	chr17	+	2	0.961506	0.330152	0.622035
ENSG00000146834.14	chr7	+	2	0.957666	0.331113	0.623234
ENSG00000127863.16	chr13	+	2	0.953886	0.332063	0.62364
ENSG00000231721.7	chr7	-	2	0.953175	0.332242	0.62364
ENSG00000124422.12	chr17	-	2	0.951917	0.332559	0.62364
ENSG00000214063.11	chr11	+	2	0.951638	0.33263	0.62364
ENSG00000114861.23	chr3	-	5	1.15271	0.333704	0.625025
ENSG00000135679.25	chr12	+	2	0.94525	0.334247	0.625025
ENSG00000054148.18	chr9	+	2	0.94486	0.334346	0.625025
ENSG00000174282.12	chr17	-	2	0.939005	0.335838	0.626797
ENSG00000126804.13	chr14	+	2	0.938576	0.335948	0.626797
ENSG00000239305.7	chr2	-	2	0.935598	0.336711	0.62761
ENSG00000198626.17	chr1	+	3	1.09828	0.337327	0.62815
ENSG00000172572.7	chr12	+	2	0.931392	0.337792	0.628276
ENSG00000173163.10	chr2	+	2	0.929796	0.338203	0.628276
ENSG00000115159.16	chr2	+	2	0.92912	0.338378	0.628276
ENSG00000162434.13	chr1	-	2	0.926746	0.338992	0.628608
ENSG00000142871.18	chr1	+	2	0.926104	0.339212	0.628608
ENSG00000135778.12	chr1	+	2	0.921288	0.340409	0.630217
ENSG00000168488.18	chr16	+	2	0.918291	0.341191	0.63102
ENSG00000158435.8	chr2	+	2	0.917103	0.341501	0.63102
ENSG00000110693.18	chr11	-	2	0.914901	0.342078	0.631318
ENSG00000099968.18	chr22	+	3	1.08328	0.342321	0.631318
ENSG00000178031.18	chr9	+	2	0.911249	0.343037	0.632031
ENSG00000100124.15	chr22	-	2	0.908396	0.343788	0.632808
ENSG00000182177.14	chr2	-	2	0.903378	0.345116	0.634643
ENSG00000116171.19	chr1	+	2	0.89877	0.346342	0.636287
ENSG00000132002.9	chr19	-	2	0.88132	0.351038	0.644112
ENSG00000101608.13	chr18	+	2	0.880174	0.351358	0.644112
ENSG00000171700.14	chr20	-	2	0.878115	0.351909	0.644112
ENSG00000270647.6	chr17	+	2	0.87703	0.352205	0.644112
ENSG00000186104.11	chr11	-	2	0.876754	0.35228	0.644112
ENSG00000171604.12	chr5	+	2	0.87517	0.352713	0.64429
ENSG00000149115.14	chr11	-	3	1.05065	0.35344	0.645004
ENSG00000109099.16	chr17	-	4	1.09423	0.353911	0.645249
ENSG00000115053.17	chr2	-	3	1.04769	0.354464	0.645643
ENSG00000105373.19	chr19	+	3	1.04475	0.355489	0.646896
ENSG00000074181.9	chr19	-	2	0.862884	0.356094	0.647383
ENSG00000133069.17	chr1	+	3	1.04009	0.357114	0.648622
ENSG00000067208.14	chr1	-	2	0.85631	0.357922	0.649109
ENSG00000135926.15	chr2	-	4	1.0843	0.358059	0.649109
ENSG00000124313.18	chrX	-	2	0.854244	0.358499	0.649293
ENSG00000106608.17	chr7	-	2	0.852114	0.359095	0.649759
ENSG00000198563.14	chr6	-	2	0.849965	0.359699	0.650237
ENSG00000166091.21	chr14	+	2	0.84712	0.360499	0.651071
ENSG00000109381.20	chr4	-	2	0.841638	0.362049	0.65317
ENSG00000198218.11	chr3	-	2	0.840193	0.362459	0.65317
ENSG00000072818.12	chr17	+	2	0.838506	0.362938	0.65317
ENSG00000106772.18	chr9	-	2	0.837529	0.363216	0.65317
ENSG00000189171.14	chr1	-	2	0.836107	0.363621	0.65317
ENSG00000132386.11	chr17	+	2	0.835658	0.363749	0.65317
ENSG00000110429.14	chr11	-	2	0.834122	0.364188	0.65317
ENSG00000177426.22	chr18	+	3	1.0191	0.36454	0.65317
ENSG00000108679.13	chr17	-	2	0.83224	0.364727	0.65317
ENSG00000148450.13	chr10	+	2	0.829427	0.365534	0.654005
ENSG00000145901.16	chr5	-	2	0.82636	0.366416	0.654101
ENSG00000082397.18	chr18	-	2	0.825936	0.366539	0.654101
ENSG00000244687.12	chr20	-	2	0.825688	0.36661	0.654101
ENSG00000117595.12	chr1	-	2	0.82416	0.367102	0.65437
ENSG00000140416.23	chr15	+	7	1.09214	0.367806	0.655016
ENSG00000102575.13	chr19	-	2	0.820226	0.368191	0.655093
ENSG00000111341.10	chr12	-	2	0.814695	0.369801	0.65683
ENSG00000100320.23	chr22	-	2	0.813974	0.370012	0.65683
ENSG00000132405.19	chr4	+	2	0.813351	0.370194	0.65683
ENSG00000086200.17	chr5	+	2	0.810747	0.370957	0.657277
ENSG00000159069.14	chr9	-	2	0.808301	0.371676	0.657277
ENSG00000136986.10	chr8	-	2	0.807975	0.371771	0.657277
ENSG00000110651.12	chr11	+	3	0.998203	0.372089	0.657277
ENSG00000159251.8	chr15	-	4	1.05128	0.37216	0.657277
ENSG00000176834.14	chr12	-	2	0.804551	0.372781	0.657597
ENSG00000163872.16	chr3	+	2	0.803719	0.373027	0.657597
ENSG00000137496.18	chr11	+	2	0.801486	0.373688	0.658158
ENSG00000153310.19	chr8	-	2	0.799406	0.374305	0.65864
ENSG00000197580.13	chr11	+	2	0.795359	0.375511	0.660155
ENSG00000144802.11	chr3	+	2	0.790348	0.37701	0.662185
ENSG00000137502.10	chr11	-	2	0.778255	0.380666	0.667993
ENSG00000107798.18	chr10	-	2	0.775771	0.381423	0.668027
ENSG00000274750.2	chr6	+	2	0.77488	0.381695	0.668027
ENSG00000114854.8	chr3	-	2	0.773008	0.382267	0.668027
ENSG00000136848.17	chr9	+	4	1.02818	0.382315	0.668027
ENSG00000167701.14	chr8	+	2	0.772489	0.382426	0.668027
ENSG00000151135.10	chr12	+	2	0.770345	0.383084	0.668567
ENSG00000182796.14	chr12	+	2	0.767397	0.383991	0.669096
ENSG00000102967.12	chr16	+	2	0.767092	0.384085	0.669096
ENSG00000071242.12	chr6	-	2	0.765675	0.384522	0.66925
ENSG00000198964.14	chr10	-	2	0.762301	0.385566	0.670375
ENSG00000050820.17	chr16	-	3	0.961147	0.385867	0.670375
ENSG00000137074.20	chr9	-	2	0.760048	0.386265	0.670459
ENSG00000130558.20	chr9	+	2	0.756489	0.387382	0.670945
ENSG00000269113.4	chr1	-	2	0.755381	0.38772	0.670945
ENSG00000128641.19	chr2	+	2	0.754831	0.387892	0.670945
ENSG00000143995.20	chr2	+	2	0.752355	0.388667	0.670945
ENSG00000188257.12	chr1	-	2	0.75216	0.388777	0.670945
ENSG00000179526.17	chr8	-	3	0.953064	0.388942	0.670945
ENSG00000176170.14	chr17	+	2	0.749979	0.389413	0.670945
ENSG00000189308.11	chr4	-	2	0.74928	0.389633	0.670945
ENSG00000169862.19	chr5	-	2	0.749087	0.389694	0.670945
ENSG00000069424.15	chr1	+	3	0.948621	0.390642	0.671632
ENSG00000107262.26	chr9	-	2	0.745601	0.390793	0.671632
ENSG00000173281.5	chr8	-	2	0.744222	0.391229	0.67178
ENSG00000197694.18	chr9	+	2	0.739141	0.392843	0.673512
ENSG00000187535.14	chr16	-	2	0.738834	0.39294	0.673512
ENSG00000012232.9	chr8	+	2	0.736077	0.39382	0.674092
ENSG00000106682.16	chr7	+	2	0.735572	0.393982	0.674092
ENSG00000121281.13	chr16	+	3	0.938535	0.39453	0.674428
ENSG00000174197.16	chr15	+	2	0.72445	0.397562	0.678446
ENSG00000114923.17	chr2	+	4	0.994411	0.397588	0.678446
ENSG00000286054.1	chr21	+	2	0.722041	0.398344	0.679132
ENSG00000140632.17	chr16	-	3	0.925271	0.399703	0.680845
ENSG00000198431.16	chr12	+	4	0.98452	0.40216	0.684422
ENSG00000168395.16	chr2	+	2	0.707589	0.403082	0.684778
ENSG00000198053.12	chr20	+	2	0.706627	0.403401	0.684778
ENSG00000185129.8	chr5	+	2	0.706505	0.403441	0.684778
ENSG00000250644.3	chr11	-	2	0.705112	0.403903	0.684956
ENSG00000198105.16	chr10	-	2	0.698325	0.406163	0.688181
ENSG00000080709.16	chr5	+	2	0.692846	0.408001	0.690255
ENSG00000065802.12	chr2	+	2	0.692132	0.408242	0.690255
ENSG00000010282.15	chr3	-	2	0.690452	0.408855	0.690255
ENSG00000167468.18	chr19	+	2	0.690218	0.408888	0.690255
ENSG00000178149.17	chr3	-	2	0.689334	0.409187	0.690255
ENSG00000177548.13	chr16	-	2	0.685053	0.410638	0.692094
ENSG00000115677.17	chr2	-	5	0.995041	0.411874	0.693569
ENSG00000254772.10	chr11	-	2	0.67803	0.413036	0.694914
ENSG00000163347.6	chr3	-	2	0.674299	0.414318	0.69646
ENSG00000168824.14	chr4	+	2	0.671923	0.415146	0.697241
ENSG00000163798.13	chr2	+	2	0.664305	0.417782	0.701055
ENSG00000053747.17	chr18	+	3	0.878803	0.41838	0.701444
ENSG00000182903.16	chr4	-	2	0.658615	0.419774	0.703167
ENSG00000148180.21	chr9	+	6	0.99725	0.420572	0.703889
ENSG00000125520.14	chr20	+	3	0.872427	0.42101	0.703905
ENSG00000175182.15	chr3	+	2	0.653936	0.421422	0.703905
ENSG00000154309.9	chr1	+	2	0.653201	0.421682	0.703905
ENSG00000007237.19	chr17	-	4	0.942324	0.422177	0.704117
ENSG00000196588.20	chr22	-	2	0.649741	0.422909	0.704726
ENSG00000121964.14	chr2	-	2	0.647133	0.423837	0.705659
ENSG00000198842.10	chr1	+	3	0.863907	0.424553	0.706238
ENSG00000189337.17	chr1	+	2	0.642262	0.425579	0.707203
ENSG00000178882.15	chr12	+	2	0.639624	0.426527	0.707203
ENSG00000168000.15	chr11	-	2	0.639305	0.426641	0.707203
ENSG00000198624.13	chr5	-	2	0.639147	0.426698	0.707203
ENSG00000164953.16	chr8	+	2	0.638375	0.426976	0.707203
ENSG00000139117.14	chr12	-	2	0.635208	0.42812	0.708486
ENSG00000119333.12	chr9	-	2	0.633834	0.428618	0.708698
ENSG00000240771.8	chr12	+	2	0.630851	0.429702	0.709878
ENSG00000161013.17	chr5	-	2	0.629795	0.430087	0.709902
ENSG00000183230.17	chr10	-	2	0.623602	0.432353	0.713029
ENSG00000076944.16	chr19	+	2	0.619933	0.433704	0.714174
ENSG00000113575.10	chr5	-	2	0.618546	0.434217	0.714174
ENSG00000152082.15	chr2	+	2	0.618475	0.434243	0.714174
ENSG00000140743.8	chr16	-	2	0.617683	0.434536	0.714174
ENSG00000222041.11	chr2	+	2	0.612771	0.436361	0.716559
ENSG00000143554.14	chr1	+	2	0.609597	0.437547	0.717891
ENSG00000166278.15	chr6	+	2	0.60846	0.437973	0.717976
ENSG00000172613.8	chr11	+	2	0.604437	0.439484	0.719229
ENSG00000060237.19	chr12	+	2	0.604429	0.439487	0.719229
ENSG00000139567.13	chr12	+	3	0.827761	0.439922	0.719326
ENSG00000032444.17	chr19	+	2	0.602247	0.440311	0.719349
ENSG00000175832.13	chr17	-	2	0.600034	0.441149	0.720105
ENSG00000112992.18	chr5	+	2	0.597817	0.44199	0.720448
ENSG00000075239.14	chr11	+	3	0.822718	0.44211	0.720448
ENSG00000047849.21	chr3	-	4	0.899164	0.443516	0.722126
ENSG00000266094.8	chr1	+	2	0.589654	0.445111	0.722355
ENSG00000132635.17	chr20	-	2	0.589081	0.445331	0.722355
ENSG00000089225.20	chr12	-	4	0.895511	0.445364	0.722355
ENSG00000080493.18	chr4	+	2	0.588595	0.445518	0.722355
ENSG00000059145.19	chr16	-	2	0.588421	0.445585	0.722355
ENSG00000172845.17	chr2	-	3	0.813277	0.446238	0.722355
ENSG00000163694.15	chr4	-	2	0.586584	0.446293	0.722355
ENSG00000126461.15	chr19	+	2	0.583416	0.447519	0.723727
ENSG00000135241.17	chr7	-	2	0.579003	0.449234	0.725533
ENSG00000163697.17	chr4	-	3	0.806124	0.449391	0.725533
ENSG00000260549.2	chr16	+	2	0.577349	0.44988	0.725711
ENSG00000112183.15	chr6	+	2	0.575212	0.450717	0.72645
ENSG00000143549.21	chr1	-	3	0.795501	0.454122	0.731324
ENSG00000163565.19	chr1	+	4	0.87738	0.454625	0.731519
ENSG00000103091.15	chr16	-	2	0.552251	0.459862	0.739326
ENSG00000158169.13	chr9	-	2	0.546742	0.462101	0.742059
ENSG00000066629.18	chr14	+	2	0.546165	0.462336	0.742059
ENSG00000255248.9	chr11	-	3	0.773638	0.464002	0.74411
ENSG00000109171.15	chr4	+	2	0.538199	0.465607	0.74606
ENSG00000101605.13	chr18	-	2	0.536616	0.466261	0.746318
ENSG00000081277.13	chr1	+	2	0.535111	0.466884	0.746318
ENSG00000057657.17	chr6	+	2	0.534809	0.46701	0.746318
ENSG00000179051.14	chr1	-	2	0.53264	0.467911	0.746318
ENSG00000110665.12	chr11	-	2	0.532226	0.46809	0.746318
ENSG00000173065.13	chr17	-	2	0.531299	0.46847	0.746318
ENSG00000172037.14	chr3	-	2	0.531072	0.468564	0.746318
ENSG00000129116.19	chr4	+	3	0.761779	0.469455	0.746318
ENSG00000196923.14	chr5	-	2	0.52865	0.469576	0.746318
ENSG00000140859.16	chr16	-	2	0.527691	0.469978	0.746318
ENSG00000141524.17	chr17	-	2	0.527524	0.470048	0.746318
ENSG00000101276.18	chr20	-	2	0.526262	0.470578	0.746541
ENSG00000107816.17	chr10	+	2	0.524665	0.471249	0.746989
ENSG00000173848.19	chr10	+	2	0.523426	0.471771	0.747199
ENSG00000183255.12	chr21	-	2	0.519183	0.473567	0.748789
ENSG00000132463.14	chr4	-	2	0.519078	0.473611	0.748789
ENSG00000109332.20	chr4	-	3	0.751951	0.474024	0.748789
ENSG00000140382.15	chr15	+	2	0.517252	0.474387	0.748789
ENSG00000127472.11	chr1	+	2	0.515887	0.474969	0.748789
ENSG00000228794.10	chr1	+	2	0.513535	0.475974	0.748789
ENSG00000184113.9	chr22	-	2	0.511081	0.477026	0.748789
ENSG00000113657.13	chr5	-	2	0.510903	0.477102	0.748789
ENSG00000266173.7	chr17	-	2	0.510778	0.477156	0.748789
ENSG00000183963.19	chr22	+	2	0.509751	0.477598	0.748789
ENSG00000138185.20	chr10	+	2	0.509627	0.477651	0.748789
ENSG00000133878.9	chr8	-	2	0.507459	0.478586	0.748789
ENSG00000250608.2	chr3	-	2	0.50657	0.47897	0.748789
ENSG00000129422.14	chr8	-	3	0.741142	0.479101	0.748789
ENSG00000154305.18	chr1	+	2	0.505533	0.479419	0.748789
ENSG00000156381.9	chr14	-	2	0.503688	0.480219	0.748789
ENSG00000154978.13	chr7	-	2	0.503199	0.480431	0.748789
ENSG00000168016.15	chr3	-	2	0.503178	0.48044	0.748789
ENSG00000103495.14	chr16	+	2	0.503146	0.480454	0.748789
ENSG00000155096.14	chr8	-	2	0.502513	0.48073	0.748789
ENSG00000038274.17	chr5	+	2	0.501951	0.480974	0.748789
ENSG00000234438.5	chr15	+	2	0.500352	0.481671	0.749111
ENSG00000141447.18	chr18	-	2	0.499687	0.481962	0.749111
ENSG00000031003.10	chr5	-	2	0.497881	0.482752	0.749731
ENSG00000182551.14	chr2	-	2	0.493788	0.48455	0.751497
ENSG00000053254.16	chr14	-	3	0.726311	0.486158	0.751497
ENSG00000233237.8	chr6	-	2	0.489908	0.486266	0.751497
ENSG00000101210.13	chr20	-	3	0.725291	0.486647	0.751497
ENSG00000121769.8	chr1	-	2	0.489042	0.48665	0.751497
ENSG00000100628.12	chr14	-	2	0.488812	0.486752	0.751497
ENSG00000170345.10	chr14	+	2	0.488166	0.487046	0.751497
ENSG00000089693.11	chr12	-	4	0.816112	0.487095	0.751497
ENSG00000117298.16	chr1	-	3	0.723692	0.487415	0.751497
ENSG00000130158.14	chr19	-	2	0.484743	0.488565	0.752126
ENSG00000015153.15	chr12	-	2	0.484636	0.488613	0.752126
ENSG00000196419.13	chr22	+	2	0.483591	0.48908	0.752126
ENSG00000158793.14	chr1	+	2	0.482896	0.489391	0.752126
ENSG00000069399.15	chr19	+	2	0.479484	0.490925	0.753392
ENSG00000048707.15	chr1	+	2	0.478314	0.491453	0.753392
ENSG00000142875.19	chr1	+	2	0.478176	0.491515	0.753392
ENSG00000242259.9	chr22	-	2	0.477573	0.491787	0.753392
ENSG00000176155.19	chr17	-	2	0.476539	0.492255	0.753508
ENSG00000008838.20	chr17	-	2	0.471329	0.494623	0.755696
ENSG00000092871.17	chr17	-	2	0.47008	0.495193	0.755696
ENSG00000153815.17	chr16	+	2	0.469995	0.495232	0.755696
ENSG00000163485.17	chr1	+	2	0.469931	0.495261	0.755696
ENSG00000169122.11	chr8	+	2	0.467349	0.496444	0.756202
ENSG00000107372.13	chr9	-	2	0.466585	0.496795	0.756202
ENSG00000157540.22	chr21	+	2	0.466419	0.496872	0.756202
ENSG00000196313.11	chr7	+	2	0.465773	0.497169	0.756202
ENSG00000127838.14	chr2	+	3	0.700837	0.498527	0.757667
ENSG00000167543.16	chr17	+	3	0.697658	0.500093	0.759445
ENSG00000142507.10	chr17	+	2	0.454687	0.502317	0.762218
ENSG00000084093.19	chr4	+	2	0.453019	0.5031	0.762287
ENSG00000118596.12	chr12	+	2	0.452896	0.503157	0.762287
ENSG00000011451.21	chr19	-	3	0.690494	0.503641	0.762417
ENSG00000160972.9	chr8	+	2	0.448057	0.50544	0.763895
ENSG00000162458.13	chr1	+	2	0.447893	0.505518	0.763895
ENSG00000158864.13	chr1	+	2	0.447272	0.505812	0.763895
ENSG00000104870.13	chr19	+	2	0.444203	0.507271	0.765496
ENSG00000167074.15	chr22	+	2	0.441266	0.508673	0.766727
ENSG00000243156.9	chr22	-	2	0.440822	0.508886	0.766727
ENSG00000008324.12	chr3	+	2	0.438484	0.510008	0.767815
ENSG00000101294.18	chr20	+	2	0.436304	0.511059	0.76842
ENSG00000156650.14	chr10	+	2	0.435988	0.511211	0.76842
ENSG00000092098.17	chr14	+	2	0.432918	0.512698	0.77005
ENSG00000119912.18	chr10	-	2	0.430456	0.513895	0.771245
ENSG00000164093.17	chr4	-	2	0.428175	0.515009	0.772312
ENSG00000078596.11	chrX	-	2	0.425556	0.516294	0.773307
ENSG00000104904.12	chr19	+	2	0.424751	0.516689	0.773307
ENSG00000107897.20	chr10	-	2	0.42436	0.516882	0.773307
ENSG00000125834.13	chr20	+	2	0.420944	0.518569	0.774767
ENSG00000138085.17	chr2	+	2	0.420581	0.518749	0.774767
ENSG00000076555.15	chr12	+	4	0.757091	0.5201	0.774767
ENSG00000121316.11	chr12	-	2	0.417261	0.520398	0.774767
ENSG00000145012.13	chr3	+	3	0.656588	0.520781	0.774767
ENSG00000114480.13	chr3	-	2	0.41634	0.520864	0.774767
ENSG00000153094.24	chr2	+	2	0.415661	0.521197	0.774767
ENSG00000106992.19	chr9	-	2	0.415074	0.521491	0.774767
ENSG00000115594.12	chr2	+	3	0.655205	0.521493	0.774767
ENSG00000134758.14	chr18	+	2	0.412663	0.522699	0.775933
ENSG00000251247.11	chr19	+	2	0.411891	0.523087	0.775933
ENSG00000085563.15	chr7	-	2	0.409956	0.524062	0.776778
ENSG00000010803.16	chr1	-	2	0.408115	0.524992	0.777308
ENSG00000076108.12	chr12	-	2	0.407646	0.52523	0.777308
ENSG00000071655.18	chr19	-	2	0.404772	0.526695	0.778318
ENSG00000115459.18	chr2	+	2	0.404705	0.526724	0.778318
ENSG00000177963.14	chr11	+	2	0.403087	0.527549	0.778444
ENSG00000131446.17	chr5	-	4	0.744049	0.527621	0.778444
ENSG00000058056.10	chr3	+	3	0.641077	0.52882	0.779613
ENSG00000150593.18	chr10	+	2	0.398503	0.529899	0.780167
ENSG00000197321.15	chr10	-	3	0.638803	0.530009	0.780167
ENSG00000077782.21	chr8	-	2	0.396612	0.530875	0.780541
ENSG00000105514.8	chr19	-	2	0.39622	0.531077	0.780541
ENSG00000078246.17	chr12	+	2	0.395167	0.531622	0.780744
ENSG00000168958.20	chr2	+	2	0.393727	0.532369	0.781242
ENSG00000136153.20	chr13	+	3	0.63216	0.533498	0.781445
ENSG00000093183.14	chr3	-	2	0.390766	0.53391	0.781445
ENSG00000118194.20	chr1	-	7	0.847681	0.534334	0.781445
ENSG00000164830.19	chr8	+	3	0.629178	0.535072	0.781445
ENSG00000184220.12	chr3	+	2	0.388024	0.535345	0.781445
ENSG00000153113.24	chr5	+	5	0.785336	0.536197	0.781445
ENSG00000086015.22	chr1	+	2	0.385517	0.536663	0.781445
ENSG00000105993.15	chr7	+	2	0.384828	0.537026	0.781445
ENSG00000169756.16	chr2	+	3	0.624993	0.537289	0.781445
ENSG00000104976.12	chr19	+	2	0.383951	0.537488	0.781445
ENSG00000094916.16	chr12	-	2	0.383072	0.537953	0.781445
ENSG00000115468.12	chr2	+	2	0.382793	0.538101	0.781445
ENSG00000134982.17	chr5	+	2	0.382297	0.538364	0.781445
ENSG00000118046.16	chr19	+	2	0.38196	0.538542	0.781445
ENSG00000213465.8	chr11	+	2	0.381817	0.538618	0.781445
ENSG00000114544.17	chr3	-	2	0.38058	0.539275	0.781806
ENSG00000156414.19	chr14	+	2	0.378966	0.540134	0.781926
ENSG00000175274.19	chr11	-	2	0.378893	0.540173	0.781926
ENSG00000086758.16	chrX	-	2	0.376566	0.541417	0.783129
ENSG00000172765.17	chr3	-	2	0.375812	0.54182	0.783129
ENSG00000101246.20	chr20	-	2	0.373951	0.54282	0.783983
ENSG00000125818.18	chr20	+	2	0.373105	0.543276	0.78405
ENSG00000068971.14	chr11	+	2	0.366883	0.546649	0.788325
ENSG00000124380.11	chr2	+	2	0.365182	0.547577	0.788792
ENSG00000163882.9	chr3	+	2	0.364783	0.547795	0.788792
ENSG00000182871.16	chr21	+	2	0.36205	0.549295	0.790234
ENSG00000124942.14	chr11	-	3	0.602029	0.549621	0.790234
ENSG00000134775.15	chr18	+	2	0.359773	0.55055	0.790786
ENSG00000165192.14	chrX	-	2	0.358359	0.551333	0.790786
ENSG00000130844.19	chr19	+	2	0.357001	0.552086	0.790786
ENSG00000196405.13	chr14	+	3	0.597251	0.552223	0.790786
ENSG00000198363.18	chr8	-	3	0.595851	0.552987	0.790786
ENSG00000108219.15	chr10	+	2	0.355316	0.553023	0.790786
ENSG00000097007.19	chr9	+	2	0.354926	0.553241	0.790786
ENSG00000172889.16	chr9	+	3	0.594666	0.553635	0.790786
ENSG00000131408.15	chr19	+	2	0.353359	0.554116	0.790786
ENSG00000145016.16	chr3	-	2	0.35294	0.55435	0.790786
ENSG00000069020.18	chr5	+	4	0.698495	0.55454	0.790786
ENSG00000067057.18	chr10	+	4	0.697644	0.555052	0.790929
ENSG00000106631.8	chr7	-	2	0.349753	0.556171	0.791738
ENSG00000151503.13	chr11	-	2	0.349035	0.556544	0.791738
ENSG00000130592.17	chr11	+	3	0.588268	0.557149	0.791738
ENSG00000149925.22	chr16	+	4	0.693053	0.557822	0.791738
ENSG00000143013.13	chr1	+	2	0.346752	0.557835	0.791738
ENSG00000103852.13	chr15	-	2	0.346033	0.558243	0.791738
ENSG00000169946.14	chr8	+	2	0.345561	0.55851	0.791738
ENSG00000164850.15	chr7	+	2	0.344265	0.559247	0.791917
ENSG00000158352.17	chrX	-	2	0.343888	0.559462	0.791917
ENSG00000204954.10	chr12	-	2	0.341665	0.560731	0.793128
ENSG00000104635.15	chr8	+	2	0.340439	0.561433	0.793279
ENSG00000100599.16	chr14	+	2	0.340035	0.561665	0.793279
ENSG00000084070.12	chr1	+	2	0.338522	0.562535	0.793923
ENSG00000166206.15	chr15	-	2	0.33693	0.563453	0.79462
ENSG00000204438.11	chr6	-	2	0.335704	0.564161	0.79462
ENSG00000132938.22	chr13	+	2	0.335515	0.564271	0.79462
ENSG00000178796.13	chr1	+	2	0.334114	0.565084	0.79518
ENSG00000183044.12	chr16	+	2	0.33309	0.565679	0.795434
ENSG00000163412.13	chr3	-	2	0.331377	0.566678	0.796255
ENSG00000213722.10	chr6	-	2	0.329308	0.567888	0.797372
ENSG00000145675.15	chr5	+	5	0.734653	0.569538	0.799103
ENSG00000133315.12	chr11	-	2	0.322634	0.571829	0.80159
ENSG00000171680.23	chr1	-	2	0.32134	0.572599	0.80159
ENSG00000109686.19	chr4	-	3	0.559709	0.573109	0.80159
ENSG00000102606.18	chr13	+	4	0.667228	0.573591	0.80159
ENSG00000182473.22	chr17	-	2	0.319566	0.573659	0.80159
ENSG00000136160.17	chr13	-	2	0.319299	0.573818	0.80159
ENSG00000116731.22	chr1	+	2	0.31844	0.574333	0.801725
ENSG00000183098.11	chr13	+	2	0.31623	0.575661	0.802278
ENSG00000196924.19	chrX	-	3	0.554663	0.575977	0.802278
ENSG00000163947.12	chr3	-	3	0.55465	0.575984	0.802278
ENSG00000111912.20	chr6	+	4	0.661058	0.577404	0.803206
ENSG00000138193.16	chr10	+	2	0.3127	0.577795	0.803206
ENSG00000100284.22	chr22	+	2	0.312518	0.577906	0.803206
ENSG00000188343.13	chr8	+	2	0.309997	0.57944	0.803698
ENSG00000196440.11	chrX	+	2	0.309921	0.579487	0.803698
ENSG00000099260.11	chr1	+	2	0.309871	0.579518	0.803698
ENSG00000146112.12	chr6	-	3	0.547013	0.580353	0.804275
ENSG00000129657.16	chr17	+	3	0.543552	0.582343	0.805904
ENSG00000169499.15	chr8	+	2	0.305225	0.582368	0.805904
ENSG00000070831.17	chr1	+	2	0.303635	0.58335	0.80668
ENSG00000121057.13	chr17	+	2	0.301599	0.584612	0.807843
ENSG00000120833.14	chr12	+	4	0.648304	0.585345	0.808273
ENSG00000241878.11	chr22	-	2	0.298437	0.586584	0.809309
ENSG00000111642.16	chr12	-	3	0.535609	0.586939	0.809309
ENSG00000092931.11	chr17	+	2	0.292687	0.590205	0.813106
ENSG00000205542.11	chrX	+	2	0.292157	0.590541	0.813106
ENSG00000166402.9	chr11	+	2	0.29134	0.59106	0.813172
ENSG00000165410.15	chr14	-	2	0.290791	0.591436	0.813172
ENSG00000136068.15	chr3	+	2	0.289915	0.591967	0.813318
ENSG00000125746.18	chr19	-	2	0.288814	0.59267	0.813701
ENSG00000154153.14	chr5	-	2	0.287439	0.593578	0.813966
ENSG00000247596.10	chr3	-	2	0.286784	0.59397	0.813966
ENSG00000164318.18	chr5	+	2	0.286526	0.594136	0.813966
[truncated: 518 more rows]

## Sheet: CAGE.DPU.Failing
geneId	cluster_chr	cluster_strand	NExons	gene.F	P.Value	FDR
[truncated: 1,884 more rows]

[truncated: 8 more sheets: CAGE.DPU.Failing.Atrium, CAGE.DPU.Failing.Ventricle, RNAseq.DGE, RNAseq.DGE.Atrium, RNAseq.DGE.Ventricle, RNAseq.DIE, RNAseq.DIE.Atrium, RNAseq.DIE.Ventricle]
