# Supplementary material for: Sex modulates the human genome regulatory network during heart failure and aging.
Source: Research Square preprint supplement (doi:10.21203/rs.3.rs-2202852/v1), 2022-11-11
Supplement: Supplementary file 6 [file e9b52c1752995249aec4a30e.xlsx]

## Sheet: column description
# header explanations:
##cluster_id2	short cluster ID
##cluster_chr	chromosome of the cluster
##cluster_start	start site of the cluster
##cluster_end	end of the cluster
##cluster_id1	original cluster ID
##cluster_tagcount	number of mapped CAGE tags to the cluster
##cluster_strand	strand of the cluster
##TSS_or_center	the highest peak in DPI cluster or the mid position of bidirectional enhancers
##transcriptId	Gencode v37 transcript ID associated with cluster by distance
##geneId	Gencode v37 gene ID associated with cluster by distance
##cons_clust_class	classifier for consensus clusters - combination of overlaps and TSSclassifier results
##geneName	gene name added if DPI cluster localized within +/-500 bp from start position of Gencode or Refseq models;

## Sheet: healthy male vs. female atria
logFC	logCPM	LR	PValue	FDR	cluster_id2	cluster_chr	cluster_start	cluster_end	cluster_id1	cluster_tagcount	cluster_strand	TSS_or_center	transcriptId	geneId	cons_clust_class	geneName
4.73579	4.66204	913.036	1.43897e-200	9.39617e-196	rDPI_55196	chrY	20575725	20575731	chrY:20575725..20575731,chrY:20575694..20575859,+;peak:chrY:20575725..20575726,+;peakCounts:12591.7	18209	+	20575725	ENST00000361365.7	ENSG00000198692.10	alternative	EIF1AY
6.00929	5.77677	895.413	9.74744e-197	3.18244e-192	rDPI_55160	chrY	2841603	2841604	chrY:2841603..2841604,chrY:2841540..2841641,+;peak:chrY:2841603..2841604,+;peakCounts:34627.5	38475	+	2841603	ENST00000250784.13	ENSG00000129824.16	promoter	RPS4Y1
3.87639	3.66617	855.981	3.64162e-188	7.92635e-184	rDPI_55178	chrY	12904828	12904840	chrY:12904828..12904840,chrY:12904755..12904886,+;peak:chrY:12904833..12904834,+;peakCounts:4111.2	7799	+	12904833	ENST00000493363.1	ENSG00000067048.17	promoter	DDX3Y
6.43572	6.72158	828.97	2.7144e-182	4.43111e-178	rDPI_55199	chrY	20575770	20575779	chrY:20575770..20575779,chrY:20575694..20575859,+;peak:chrY:20575776..20575777,+;peakCounts:39602.7	77274	+	20575776	ENST00000361365.7	ENSG00000198692.10	promoter	EIF1AY
3.74777	3.5157	763.641	4.33834e-168	5.66569e-164	rDPI_55192	chrY	19744713	19744729	chrY:19744713..19744729,-	5697	-	19744722	ENST00000317961.9	ENSG00000012817.16	promoter	KDM5D
4.36602	4.29041	760.857	1.74898e-167	1.90342e-163	rDPI_55197	chrY	20575736	20575745	chrY:20575736..20575745,chrY:20575694..20575859,+;peak:chrY:20575739..20575740,+;peakCounts:1271.7	11935	+	20575739	ENST00000361365.7	ENSG00000198692.10	alternative	EIF1AY
3.46711	3.22058	537.492	6.62222e-119	6.17739e-115	rDPI_55186	chrY	19077355	19077369	chrY:19077355..19077369,chrY:19077284..19077412,-;peak:chrY:19077360..19077361,-;peakCounts:1927.8	4255	-	19077360	ENST00000667640.1	ENSG00000176728.10	promoter	TTTY14
3.38155	3.22548	502.282	3.0304e-111	2.47349e-107	rDPI_55198	chrY	20575749	20575752	chrY:20575749..20575752,chrY:20575694..20575859,+;peak:chrY:20575750..20575751,+;peakCounts:664.7	5297	+	20575750	ENST00000361365.7	ENSG00000198692.10	alternative	EIF1AY
2.7425	2.76311	496.463	5.59121e-110	4.05661e-106	rDPI_55175	chrY	12662351	12662363	chrY:12662351..12662363,chrY:12662351..12662576,+;peak:chrY:12662354..12662355,+;peakCounts:1279.8	3270	+	12662354	ENST00000651177.1	ENSG00000114374.13	promoter	USP9Y
2.79317	2.50923	479.869	2.28149e-106	1.48977e-102	rDPI_55164	chrY	2935376	2935395	chrY:2935376..2935395,chrY:2935341..2935450,+;peak:chrY:2935389..2935390,+;peakCounts:993.6	2943	+	2935389	ENST00000155093.8	ENSG00000067646.12	promoter	ZFY
2.98991	2.72184	477.956	5.94969e-106	3.53184e-102	rDPI_55190	chrY	19567345	19567368	chrY:19567345..19567368,chrY:19567311..19567414,+;peak:chrY:19567350..19567351,+;peakCounts:853.2	3478	+	19567350	ENST00000459719.6	ENSG00000131002.12	promoter	TXLNGY
2.46975	2.39803	380.327	1.05623e-84	5.74746e-81	rDPI_55177	chrY	12904820	12904826	chrY:12904820..12904826,chrY:12904755..12904886,+;peak:chrY:12904823..12904824,+;peakCounts:846.2	2300	+	12904823	ENST00000493363.1	ENSG00000067048.17	alternative	DDX3Y
2.24556	2.27941	323.097	3.06479e-72	1.53942e-68	rDPI_55176	chrY	12662367	12662382	chrY:12662367..12662382,chrY:12662351..12662576,+;peak:chrY:12662377..12662378,+;peakCounts:451.8	2137	+	12662377	ENST00000651177.1	ENSG00000114374.13	alternative	USP9Y
2.98876	2.6632	301.397	1.63491e-67	7.62544e-64	rDPI_55184	chrY	19076000	19076013	chrY:19076000..19076013,chrY:19075974..19076126,-;peak:chrY:19076007..19076008,-;peakCounts:843.3	2753	-	19076007	ENST00000670354.1	ENSG00000176728.10	promoter	TTTY14
-3.28048	2.9049	297.571	1.11406e-66	4.84972e-63	rDPI_54311	chrX	73852709	73852719	chrX:73852709..73852719,chrX:73852610..73852749,-;peak:chrX:73852714..73852715,-;peakCounts:1368	3066	-	73852714	ENST00000429829.6	ENSG00000229807.12	promoter	XIST
2.69881	2.7487	249.554	3.24788e-56	1.3255e-52	rDPI_55179	chrY	12904864	12904873	chrY:12904864..12904873,chrY:12904755..12904886,+;peak:chrY:12904868..12904869,+;peakCounts:2223.2	3361	+	12904868	ENST00000336079.8	ENSG00000067048.17	alternative	DDX3Y
2.48825	2.22912	208.925	2.35696e-47	9.05322e-44	rDPI_55185	chrY	19077318	19077330	chrY:19077318..19077330,chrY:19077284..19077412,-;peak:chrY:19077325..19077326,-;peakCounts:397.8	1701	-	19077325	ENST00000650897.1	ENSG00000176728.10	alternative	TTTY14
2.1089	1.96111	195.923	1.62051e-44	5.87867e-41	rDPI_55182	chrY	13479973	13479992	chrY:13479973..13479992,chrY:13479921..13480038,-;peak:chrY:13479987..13479988,-;peakCounts:339.3	1365	-	13479987	ENST00000382893.2	ENSG00000183878.15	promoter	UTY
1.70693	1.67138	141.537	1.22807e-32	4.22055e-29	rDPI_55183	chrY	13479998	13480016	chrY:13479998..13480016,chrY:13479921..13480038,-;peak:chrY:13480010..13480011,-;peakCounts:339.3	1024	-	13480010	ENST00000382893.2	ENSG00000183878.15	alternative	UTY
2.34972	2.46274	133.795	6.05914e-31	1.97825e-27	rDPI_55180	chrY	12904879	12904884	chrY:12904879..12904884,chrY:12904755..12904886,+;peak:chrY:12904882..12904883,+;peakCounts:1426.2	2505	+	12904882	ENST00000336079.8	ENSG00000067048.17	alternative	DDX3Y
1.32251	1.49265	113.497	1.67953e-26	5.22237e-23	rDPI_55191	chrY	19567371	19567379	chrY:19567371..19567379,chrY:19567311..19567414,+;peak:chrY:19567372..19567373,+;peakCounts:198.2	708	+	19567372	ENST00000447520.5	ENSG00000131002.12	alternative	TXLNGY
-1.64605	1.55936	105.188	1.1109e-24	3.29482e-21	rDPI_54310	chrX	73852680	73852688	chrX:73852680..73852688,chrX:73852610..73852749,-;peak:chrX:73852680..73852681,-;peakCounts:233	924	-	73852680	ENST00000429829.6	ENSG00000229807.12	alternative	XIST
1.842	1.90739	105.101	1.16054e-24	3.29482e-21	rDPI_55194	chrY	20575483	20575500	chrY:20575483..20575500,chrY:20575483..20575548,-;peak:chrY:20575491..20575492,-;peakCounts:412.2	1046	-	20575491	ENST00000661812.1	ENSG00000229236.3	promoter	TTTY10
1.35124	1.48671	93.8494	3.40471e-22	9.26337e-19	rDPI_55168	chrY	7274125	7274149	chrY:7274125..7274149,chrY:7273932..7274207,+;peak:chrY:7274130..7274131,+;peakCounts:199.8	764	+	7274130	ENST00000528056.5	ENSG00000099725.14	ambiguous	PRKY
1.152	1.41776	81.3656	1.876e-19	4.89995e-16	rDPI_55187	chrY	19077461	19077479	chrY:19077461..19077479,chrY:19077433..19077548,-;peak:chrY:19077473..19077474,-;peakCounts:283.5	497	-	19077473	ENST00000331787.2	ENSG00000176728.10	alternative	TTTY14
1.20381	1.32866	75.8814	3.01229e-18	7.56526e-15	rDPI_55181	chrY	13479959	13479968	chrY:13479959..13479968,chrY:13479921..13480038,-;peak:chrY:13479963..13479964,-;peakCounts:254.3	476	-	13479963	ENST00000382893.2	ENSG00000183878.15	alternative	UTY
1.1053	1.32153	58.2132	2.35195e-14	5.68807e-11	rDPI_55167	chrY	7274043	7274068	chrY:7274043..7274068,chrY:7273932..7274207,+;peak:chrY:7274055..7274056,+;peakCounts:151.8	594	+	7274055	ENST00000528056.5	ENSG00000099725.14	promoter	PRKY
1.00579	1.19848	57.0233	4.30681e-14	1.00438e-10	rDPI_55163	chrY	2935366	2935373	chrY:2935366..2935373,chrY:2935341..2935450,+;peak:chrY:2935369..2935370,+;peakCounts:246.6	426	+	2935369	ENST00000155093.8	ENSG00000067646.12	alternative	ZFY
0.92717	1.31306	49.8629	1.64874e-12	3.66321e-09	rDPI_55165	chrY	2935415	2935421	chrY:2935415..2935421,chrY:2935341..2935450,+;peak:chrY:2935417..2935418,+;peakCounts:150.6	460	+	2935417	ENST00000625061.3	ENSG00000067646.12	alternative	ZFY
3.88985	4.17722	49.8225	1.68299e-12	3.66321e-09	rDPI_53840	chrX	39788212	39788213	chrX:39788212..39788213,-	8623	-	39788212	ENST00000452570.1	ENSG00000228232.1	promoter	NA
1.56253	1.67441	45.7776	1.32469e-11	2.79031e-08	rDPI_1153	chr1	31937774	31937787	chr1:31937774..31937787,chr1:31937766..31937930,-;peak:chr1:31937774..31937775,-;peakCounts:425.4	898	-	31937774	ENST00000649841.1	ENSG00000184007.22	alternative	PTP4A2
0.931276	1.13458	45.0035	1.9668e-11	4.01337e-08	rDPI_55188	chrY	19567006	19567015	chrY:19567006..19567015,-	350	-	19567008	ENST00000651484.1	ENSG00000215580.11	promoter	BCORP1
3.86813	5.52411	44.0016	3.28115e-11	6.4925e-08	rDPI_37404	chr3	96617906	96617923	chr3:96617906..96617923,chr3:96617906..96617981,-;peak:chr3:96617915..96617916,-;peakCounts:3157.2	10182	-	96617915	ENST00000600213.3	ENSG00000269028.3	alternative	MTRNR2L2
2.49709	1.90053	43.8367	3.56941e-11	6.85516e-08	rDPI_20748	chr17	4641678	4641682	chr17:4641678..4641682,-	1393	-	4641678	ENST00000293761.8	ENSG00000161905.13	promoter	ALOX15
-2.5585	1.55653	43.4879	4.26594e-11	7.95877e-08	rDPI_34098	chr21	8398618	8398621	chr21:8398618..8398621,+	519	+	8398619	ENST00000613359.1	ENSG00000275215.1	alternative	RNA5-8SN3
0.940054	1.46183	43.1232	5.13981e-11	9.32277e-08	rDPI_55200	chrY	20579627	20579642	chrY:20579627..20579642,chrY:20579608..20579688,+;peak:chrY:20579636..20579637,+;peakCounts:163.8	474	+	20579636	ENST00000382772.3	ENSG00000198692.10	enhancer	EIF1AY
2.13006	1.32142	39.3675	3.51098e-10	6.19621e-07	rDPI_34065	chr21	8254068	8254069	chr21:8254068..8254069,+	747	+	8254068	ENST00000610460.1	ENSG00000277739.1	ambiguous	RNA5-8SP10
-3.14096	2.82875	35.7075	2.29283e-09	3.93992e-06	rDPI_39788	chr4	73740569	73740570	chr4:73740569..73740570,chr4:73740525..73740725,+;peak:chr4:73740569..73740570,+;peakCounts:15387.3	17097	+	73740569	ENST00000483500.1	ENSG00000169429.11	promoter	CXCL8
1.19726	1.69944	35.5681	2.46292e-09	4.12368e-06	rDPI_14729	chr14	22489316	22489335	chr14:22489316..22489335,chr14:22489231..22489504,+;peak:chr14:22489329..22489330,+;peakCounts:236.6	823	+	22489329	ENST00000390488.1	ENSG00000211840.1	alternative	TRAJ49
1.28772	1.3567	34.9296	3.41839e-09	5.58035e-06	rDPI_6761	chr10	89342684	89342701	chr10:89342684..89342701,chr10:89342652..89342738,-;peak:chr10:89342697..89342698,-;peakCounts:135.9	401	-	89342697	ENST00000282673.5	ENSG00000107798.18	promoter	LIPA
-5.01785	4.61589	34.3807	4.53184e-09	7.21756e-06	rDPI_18	chr1	632249	632267	chr1:632249..632267,chr1:632244..632337,+;peak:chr1:632249..632250,+;peakCounts:7616.7	13762	+	632249	ENST00000427426.1	ENSG00000229344.1	not_classified	MTCO2P12
-3.74921	3.03227	34.1419	5.12361e-09	7.96575e-06	rDPI_22459	chr17	53105966	53105982	chr17:53105966..53105982,chr17:53105939..53105995,+;peak:chr17:53105972..53105973,+;peakCounts:900.9	3733	+	53105972	ENST00000574371.1	ENSG00000262902.1	not_classified	MTCO1P40
-2.97009	2.87553	33.7824	6.16343e-09	9.35952e-06	rDPI_39807	chr4	74038689	74038690	chr4:74038689..74038690,chr4:74038670..74038811,-;peak:chr4:74038689..74038690,-;peakCounts:9346.5	10385	-	74038689	ENST00000296026.4	ENSG00000163734.4	promoter	CXCL3
2.09119	1.93303	33.5533	6.93387e-09	1.02902e-05	rDPI_47744	chr7	76510545	76510558	chr7:76510545..76510558,chr7:76510516..76510587,+;peak:chr7:76510552..76510553,+;peakCounts:676.8	1151	+	76510552	ENST00000334348.8	ENSG00000243566.7	promoter	UPK3B
-0.60621	3.56842	32.1698	1.41269e-08	2.04991e-05	rDPI_53775	chrX	24149725	24149741	chrX:24149725..24149741,chrX:24149614..24149837,+;peak:chrX:24149729..24149730,+;peakCounts:2293.2	7106	+	24149729	ENST00000419690.5	ENSG00000005889.16	promoter	ZFX
0.767145	1.39436	31.9722	1.56391e-08	2.22e-05	rDPI_55161	chrY	2845704	2845705	chrY:2845704..2845705,chrY:2845646..2845740,+;peak:chrY:2845704..2845705,+;peakCounts:333.9	371	+	2845704	ENST00000430575.1	ENSG00000129824.16	enhancer	RPS4Y1
5.82057	7.84166	31.8255	1.68665e-08	2.3433e-05	rDPI_29700	chr2	148881819	148881820	chr2:148881819..148881820,chr2:148881760..148881833,-;peak:chr2:148881819..148881820,-;peakCounts:562468.5	624965	-	148881819	ENST00000608822.1	ENSG00000231079.7	enhancer	NA
4.03209	5.60028	31.0655	2.49464e-08	3.32585e-05	rDPI_3629	chr1	160885031	160885214	chr1:160885031..160885214,chr1:160885031..160885214,-	32130	-	160885170	ENST00000326245.4	ENSG00000179914.5	promoter	ITLN1
1.31766	2.47819	31.0647	2.49574e-08	3.32585e-05	rDPI_1154	chr1	31937796	31937823	chr1:31937796..31937823,chr1:31937766..31937930,-;peak:chr1:31937803..31937804,-;peakCounts:563.4	2265	-	31937803	ENST00000524384.5	ENSG00000184007.22	promoter	PTP4A2
1.1896	1.03516	30.9858	2.59921e-08	3.39446e-05	rDPI_50806	chr8	130141393	130141409	chr8:130141393..130141409,chr8:130141363..130141426,-;peak:chr8:130141400..130141401,-;peakCounts:43.2	164	-	130141400	ENST00000524018.1	ENSG00000153317.15	enhancer	ASAP1
0.692757	1.18465	30.8538	2.78222e-08	3.5001e-05	rDPI_1155	chr1	31937898	31937905	chr1:31937898..31937905,chr1:31937766..31937930,-;peak:chr1:31937903..31937904,-;peakCounts:82.4	296	-	31937903	ENST00000532289.1	ENSG00000184007.22	alternative	PTP4A2
0.791994	1.98251	30.8502	2.7873e-08	3.5001e-05	rDPI_10461	chr11	119018682	119018695	chr11:119018682..119018695,chr11:119018589..119018733,-;peak:chr11:119018688..119018689,-;peakCounts:483.7	1643	-	119018688	ENST00000527853.1	ENSG00000118181.11	alternative	RPS25
0.695633	1.25792	30.6496	3.09096e-08	3.80818e-05	rDPI_42327	chr5	95852232	95852236	chr5:95852232..95852236,+	354	+	95852233	ENST00000357880.8	ENSG00000236882.8	promoter	LINC01554
-2.06075	1.88361	30.2546	3.78899e-08	4.58173e-05	rDPI_16789	chr14	106557470	106557478	chr14:106557470..106557478,-	1184	-	106557477	ENST00000390625.3	ENSG00000211965.4	promoter	IGHV3-49
0.725592	1.21773	29.8982	4.55338e-08	5.40594e-05	rDPI_55162	chrY	2854630	2854649	chrY:2854630..2854649,chrY:2854599..2854684,+;peak:chrY:2854637..2854638,+;peakCounts:76.5	280	+	2854637	ENST00000515575.1	ENSG00000129824.16	promoter	RPS4Y1
0.75849	1.12835	29.0351	7.10788e-08	8.17611e-05	rDPI_55189	chrY	19567329	19567331	chrY:19567329..19567331,chrY:19567311..19567414,+;peak:chrY:19567329..19567330,+;peakCounts:106.2	358	+	19567329	ENST00000407724.7	ENSG00000131002.12	alternative	TXLNGY
2.72397	3.3314	29.0272	7.1371e-08	8.17611e-05	rDPI_47029	chr7	25838987	25839141	chr7:25838987..25839141,chr7:25838987..25839141,+	9650	+	25839076	ENST00000659273.1	ENSG00000287096.1	enhancer	NA
0.728262	4.53253	28.9415	7.45971e-08	8.39835e-05	rDPI_54731	chrX	129523482	129523496	chrX:129523482..129523496,chrX:129523345..129523597,-;peak:chrX:129523490..129523491,-;peakCounts:5718.6	11214	-	129523490	ENST00000371123.5	ENSG00000102038.16	promoter	SMARCA1
0.744139	1.15006	28.8499	7.82103e-08	8.51425e-05	rDPI_55195	chrY	20575512	20575518	chrY:20575512..20575518,chrY:20575483..20575548,-;peak:chrY:20575515..20575516,-;peakCounts:173.2	283	-	20575515	ENST00000666666.1	ENSG00000229236.3	alternative	TTTY10
0.889377	1.53439	28.8362	7.87645e-08	8.51425e-05	rDPI_23611	chr18	11689253	11689273	chr18:11689253..11689273,chr18:11689226..11689333,+;peak:chr18:11689264..11689265,+;peakCounts:237.6	915	+	11689264	ENST00000334049.11	ENSG00000141404.17	alternative	GNAL
-0.808517	1.06729	28.8173	7.95383e-08	8.51425e-05	rDPI_15451	chr14	34241449	34241451	chr14:34241449..34241451,chr14:34241428..34241500,-;peak:chr14:34241449..34241450,-;peakCounts:144.6	167	-	34241449	ENST00000546681.5	ENSG00000129521.15	alternative	EGLN3
1.25893	2.74277	28.6009	8.89409e-08	9.35332e-05	rDPI_19653	chr16	46732288	46732300	chr16:46732288..46732300,chr16:46732214..46732672,-;peak:chr16:46732295..46732296,-;peakCounts:1656	3219	-	46732295	ENST00000569844.1	ENSG00000140795.13	alternative	MYLK3
1.22658	1.50846	28.5728	9.02416e-08	9.35332e-05	rDPI_39279	chr4	11336756	11336781	chr4:11336756..11336781,+	733	+	11336780	ENST00000384983.1	ENSG00000207716.1	enhancer	MIR572
0.77541	1.23231	28.4733	9.49978e-08	9.69244e-05	rDPI_55173	chrY	12421573	12421578	chrY:12421573..12421578,chrY:12421536..12421620,-;peak:chrY:12421573..12421574,-;peakCounts:363.6	525	-	12421573	ENST00000651835.1	ENSG00000206159.11	promoter	GYG2P1
-0.765401	2.31617	28.3742	9.99889e-08	0.000100447	rDPI_21529	chr17	30921939	30921956	chr17:30921939..30921956,chr17:30921883..30921986,+;peak:chr17:30921945..30921946,+;peakCounts:798.3	2301	+	30921945	ENST00000330889.8	ENSG00000184060.11	promoter	ADAP2
1.75281	1.56339	28.3387	1.0184e-07	0.000100757	rDPI_27070	chr19	50476231	50476242	chr19:50476231..50476242,chr19:50476191..50476278,-;peak:chr19:50476236..50476237,-;peakCounts:420.3	529	-	50476236	ENST00000600330.1	ENSG00000142530.11	promoter	FAM71E1
-1.7634	1.21969	28.2763	1.05174e-07	0.000102503	rDPI_432	chr1	11851822	11851826	chr1:11851822..11851826,-	337	-	11851825	ENST00000376476.1	ENSG00000175206.10	enhancer	NPPA
-0.936806	4.00581	27.9298	1.25797e-07	0.000120799	rDPI_47440	chr7	49773645	49773653	chr7:49773645..49773653,chr7:49773551..49774092,+;peak:chr7:49773650..49773651,+;peakCounts:8433	10965	+	49773650	ENST00000340652.5	ENSG00000188730.5	promoter	VWC2
0.752787	1.5961	27.8993	1.27794e-07	0.000120938	rDPI_1453	chr1	40665672	40665692	chr1:40665672..40665692,chr1:40665659..40665724,-;peak:chr1:40665677..40665678,-;peakCounts:162.9	647	-	40665677	ENST00000372684.8	ENSG00000117016.10	promoter	RIMS3
0.789685	1.16024	27.3137	1.72983e-07	0.000161364	rDPI_55193	chrY	19744881	19744890	chrY:19744881..19744890,chrY:19744849..19744952,-;peak:chrY:19744884..19744885,-;peakCounts:212.4	329	-	19744884	ENST00000440077.5	ENSG00000012817.16	alternative	KDM5D
2.39982	2.11392	27.1899	1.84424e-07	0.000167279	rDPI_37407	chr3	96617961	96617967	chr3:96617961..96617967,chr3:96617906..96617981,-;peak:chr3:96617966..96617967,-;peakCounts:801.2	1972	-	96617966	ENST00000600213.3	ENSG00000269028.3	alternative	MTRNR2L2
-2.3811	2.19263	27.1896	1.84448e-07	0.000167279	rDPI_34382	chr21	35168708	35168709	chr21:35168708..35168709,-	1858	-	35168708	ENST00000468726.1	ENSG00000159216.19	enhancer	RUNX1
-3.77062	3.58703	26.8953	2.14781e-07	0.000190342	rDPI_23	chr1	633751	633766	chr1:633751..633766,chr1:633749..633820,+;peak:chr1:633751..633752,+;peakCounts:1947.6	5610	+	633751	ENST00000514057.1	ENSG00000248527.1	promoter	MTATP6P1
-0.803504	2.05268	26.887	2.15708e-07	0.000190342	rDPI_19724	chr16	50266535	50266575	chr16:50266535..50266575,chr16:50266477..50266591,+;peak:chr16:50266560..50266561,+;peakCounts:293.4	1693	+	50266560	ENST00000566433.6	ENSG00000121281.13	promoter	ADCY7
1.58986	2.85518	26.5733	2.53724e-07	0.000220903	rDPI_14727	chr14	22489259	22489284	chr14:22489259..22489284,chr14:22489231..22489504,+;peak:chr14:22489272..22489273,+;peakCounts:984.6	3655	+	22489272	ENST00000390488.1	ENSG00000211840.1	enhancer	TRAJ49
-1.49014	3.17961	26.2399	3.01527e-07	0.000259067	rDPI_418	chr1	11846011	11846016	chr1:11846011..11846016,chr1:11845740..11846022,-;peak:chr1:11846015..11846016,-;peakCounts:660.8	3038	-	11846015	ENST00000610706.1	ENSG00000175206.10	alternative	NPPA
-2.1947	2.32492	26.1372	3.17994e-07	0.000269667	rDPI_16771	chr14	106038361	106038366	chr14:106038361..106038366,-	1965	-	106038364	ENST00000390597.3	ENSG00000211937.3	promoter	IGHV2-5
-2.5757	3.33871	26.0273	3.36615e-07	0.000281799	rDPI_26646	chr19	45467992	45468082	chr19:45467992..45468082,chr19:45467992..45468082,+	8828	+	45467996	ENST00000615753.4	ENSG00000125740.14	promoter	FOSB
-1.50849	1.16599	25.8705	3.65104e-07	0.00030178	rDPI_34150	chr21	8443333	8443339	chr21:8443333..8443339,chr21:8443254..8443357,+;peak:chr21:8443336..8443337,+;peakCounts:166.3	317	+	8443336	ENST00000619471.1	ENSG00000278189.1	alternative	RNA5-8SN1
0.986192	1.05364	25.7076	3.97266e-07	0.000324258	rDPI_49340	chr8	11321427	11321437	chr8:11321427..11321437,chr8:11321393..11321448,+;peak:chr8:11321431..11321432,+;peakCounts:141.9	218	+	11321431	ENST00000382435.5	ENSG00000177710.6	enhancer	SLC35G5
-1.44392	4.1473	25.4574	4.5227e-07	0.000364596	rDPI_20778	chr17	4903091	4903095	chr17:4903091..4903095,chr17:4902980..4903138,-;peak:chr17:4903091..4903092,-;peakCounts:6161.4	7223	-	4903091	ENST00000649488.2	ENSG00000108556.10	promoter	CHRNE
2.09587	1.83969	25.3294	4.83298e-07	0.000384858	rDPI_37405	chr3	96617934	96617939	chr3:96617934..96617939,chr3:96617906..96617981,-;peak:chr3:96617936..96617937,-;peakCounts:72.2	1283	-	96617936	ENST00000600213.3	ENSG00000269028.3	promoter	MTRNR2L2
1.11918	0.992439	25.168	5.2547e-07	0.000413399	rDPI_34111	chr21	8399927	8399941	chr21:8399927..8399941,chr21:8399926..8400025,+;peak:chr21:8399928..8399929,+;peakCounts:79.1	229	+	8399928	ENST00000613359.1	ENSG00000275215.1	alternative	RNA5-8SN3
-0.93823	3.02035	25.0782	5.50513e-07	0.000423013	rDPI_32811	chr20	3712581	3712605	chr20:3712581..3712605,chr20:3712521..3712642,-;peak:chr20:3712586..3712587,-;peakCounts:805.3	3251	-	3712586	ENST00000344754.6	ENSG00000088827.13	promoter	SIGLEC1
-2.52392	3.21747	25.0777	5.50646e-07	0.000423013	rDPI_46132	chr6	137867257	137867262	chr6:137867257..137867262,chr6:137867174..137867410,+;peak:chr6:137867259..137867260,+;peakCounts:11070	19306	+	137867259	ENST00000612899.5	ENSG00000118503.15	promoter	TNFAIP3
-0.63253	4.8169	24.9805	5.79117e-07	0.000439712	rDPI_32873	chr20	5610985	5611032	chr20:5610985..5611032,chr20:5610865..5611075,-;peak:chr20:5611026..5611027,-;peakCounts:2414.7	14356	-	5611026	ENST00000379019.7	ENSG00000125772.14	promoter	GPCPD1
-2.20365	2.11259	24.9374	5.92226e-07	0.000444496	rDPI_11	chr1	630283	630289	chr1:630283..630289,chr1:630243..630318,+;peak:chr1:630283..630284,+;peakCounts:2297.7	2655	+	630283	ENST00000457540.1	ENSG00000225630.1	promoter	MTND2P28
-1.73249	1.35822	24.8749	6.11746e-07	0.00045393	rDPI_3690	chr1	161524540	161524541	chr1:161524540..161524541,+	1339	+	161524540	ENST00000309758.6	ENSG00000173110.8	promoter	HSPA6
0.545682	4.51627	24.8512	6.19304e-07	0.000454374	rDPI_54730	chrX	129523443	129523461	chrX:129523443..129523461,chrX:129523345..129523597,-;peak:chrX:129523443..129523444,-;peakCounts:3834.6	9597	-	129523443	ENST00000617310.4	ENSG00000102038.16	alternative	SMARCA1
-1.13704	1.22062	24.6516	6.86862e-07	0.000498341	rDPI_22209	chr17	47213808	47213817	chr17:47213808..47213817,-	303	-	47213816	ENST00000532575.1	ENSG00000004897.12	enhancer	CDC27
-0.58153	1.30962	24.5321	7.30808e-07	0.000524399	rDPI_19723	chr16	50246166	50246176	chr16:50246166..50246176,chr16:50246082..50246190,+;peak:chr16:50246171..50246172,+;peakCounts:262.8	619	+	50246171	ENST00000564044.5	ENSG00000121281.13	promoter	ADCY7
0.730676	1.81792	24.3173	8.1702e-07	0.000579889	rDPI_10156	chr11	107591268	107591278	chr11:107591268..107591278,chr11:107591200..107591353,+;peak:chr11:107591273..107591274,+;peakCounts:613.8	1022	+	107591273	ENST00000443271.2	ENSG00000110675.13	promoter	ELMOD1
-0.906062	3.91118	24.1677	8.83021e-07	0.000619995	rDPI_41587	chr5	40679915	40679923	chr5:40679915..40679923,chr5:40679894..40679985,+;peak:chr5:40679917..40679918,+;peakCounts:4440.6	9159	+	40679917	ENST00000302472.4	ENSG00000171522.6	promoter	PTGER4
0.678854	0.963152	24.1438	8.94053e-07	0.000621062	rDPI_1152	chr1	31937529	31937545	chr1:31937529..31937545,chr1:31937504..31937573,-;peak:chr1:31937539..31937540,-;peakCounts:33.3	134	-	31937539	ENST00000649841.1	ENSG00000184007.22	enhancer	PTP4A2
1.3961	1.35493	23.9048	1.01219e-06	0.000695729	rDPI_27071	chr19	50476244	50476254	chr19:50476244..50476254,chr19:50476191..50476278,-;peak:chr19:50476249..50476250,-;peakCounts:75.3	330	-	50476249	ENST00000600330.1	ENSG00000142530.11	alternative	FAM71E1
-2.42862	2.85377	23.878	1.0264e-06	0.000698143	rDPI_39800	chr4	73869393	73869394	chr4:73869393..73869394,chr4:73869267..73869443,+;peak:chr4:73869393..73869394,+;peakCounts:9697.5	10775	+	73869393	ENST00000509101.1	ENSG00000163739.5	promoter	CXCL1
-1.71624	3.06964	23.389	1.32333e-06	0.000890835	rDPI_17618	chr15	62165283	62165286	chr15:62165283..62165286,-	5680	-	62165283	ENST00000380392.4	ENSG00000205502.4	promoter	C2CD4B
1.46014	2.5052	23.21	1.45241e-06	0.000967752	rDPI_39649	chr4	56681297	56681298	chr4:56681297..56681298,chr4:56681274..56681370,-;peak:chr4:56681297..56681298,-;peakCounts:1821.6	2024	-	56681297	ENST00000605395.1	ENSG00000171476.22	promoter	HOPX
0.72873	1.55003	23.0819	1.55246e-06	0.00102397	rDPI_23612	chr18	11689281	11689296	chr18:11689281..11689296,chr18:11689226..11689333,+;peak:chr18:11689289..11689290,+;peakCounts:462.6	998	+	11689289	ENST00000334049.11	ENSG00000141404.17	promoter	GNAL
-2.70948	2.55415	22.9344	1.67624e-06	0.00109455	rDPI_20	chr1	632313	632319	chr1:632313..632319,chr1:632244..632337,+;peak:chr1:632318..632319,+;peakCounts:1195.7	2142	+	632318	ENST00000427426.1	ENSG00000229344.1	alternative	MTCO2P12
-1.23756	4.67555	22.6743	1.91913e-06	0.00124075	rDPI_26031	chr19	36100599	36100620	chr19:36100599..36100620,chr19:36100561..36100755,+;peak:chr19:36100599..36100600,+;peakCounts:7380	15295	+	36100599	ENST00000680211.1	ENSG00000075702.19	promoter	WDR62
-1.07222	2.06113	22.5208	2.07876e-06	0.00132615	rDPI_26032	chr19	36100684	36100690	chr19:36100684..36100690,chr19:36100561..36100755,+;peak:chr19:36100689..36100690,+;peakCounts:145	1627	+	36100689	ENST00000680211.1	ENSG00000075702.19	alternative	WDR62
-2.90208	3.14449	22.5088	2.09185e-06	0.00132615	rDPI_21821	chr17	40015436	40015441	chr17:40015436..40015441,+	11817	+	40015440	ENST00000394149.8	ENSG00000108342.13	promoter	CSF3
-1.75033	2.1681	22.3418	2.2818e-06	0.00143267	rDPI_4148	chr1	186680423	186680428	chr1:186680423..186680428,-	2557	-	186680423	ENST00000367468.10	ENSG00000073756.13	promoter	PTGS2
-0.849679	3.25358	22.0289	2.68577e-06	0.00166032	rDPI_47439	chr7	49773633	49773644	chr7:49773633..49773644,chr7:49773551..49774092,+;peak:chr7:49773638..49773639,+;peakCounts:2585	5653	+	49773638	ENST00000340652.5	ENSG00000188730.5	alternative	VWC2
1.40541	2.32745	22.0221	2.69525e-06	0.00166032	rDPI_24051	chr18	50650035	50650048	chr18:50650035..50650048,chr18:50649982..50650232,+;peak:chr18:50650035..50650036,+;peakCounts:1262.7	2677	+	50650035	ENST00000587823.1	ENSG00000141639.12	enhancer	MAPK4
0.545942	2.01409	21.9419	2.81027e-06	0.001715	rDPI_33116	chr20	30377173	30377186	chr20:30377173..30377186,chr20:30377164..30377316,+;peak:chr20:30377180..30377181,+;peakCounts:672.2	1664	+	30377180	ENST00000278882.8	ENSG00000149531.15	alternative	NA
0.761175	3.26854	21.6951	3.19599e-06	0.00191716	rDPI_13807	chr13	27270740	27270834	chr13:27270740..27270834,chr13:27270740..27270834,+	4363	+	27270830	ENST00000241463.5	ENSG00000122035.7	promoter	RASL11A
-1.0357	3.96633	21.6926	3.20025e-06	0.00191716	rDPI_41583	chr5	39424968	39424986	chr5:39424968..39424986,chr5:39424839..39425231,-;peak:chr5:39424980..39424981,-;peakCounts:3519.9	8908	-	39424980	ENST00000320816.11	ENSG00000153071.15	promoter	DAB2
-1.39855	3.36614	21.5488	3.44946e-06	0.00204766	rDPI_415	chr1	11845937	11845942	chr1:11845937..11845942,chr1:11845740..11846022,-;peak:chr1:11845937..11845938,-;peakCounts:503.8	3545	-	11845937	ENST00000610706.1	ENSG00000175206.10	alternative	NPPA
-2.02998	4.90524	21.4434	3.64438e-06	0.00213574	rDPI_25027	chr19	10271039	10271191	chr19:10271039..10271191,chr19:10271039..10271191,+	25669	+	10271120	ENST00000423829.2	ENSG00000090339.9	promoter	ICAM1
1.66784	2.18733	21.4334	3.66324e-06	0.00213574	rDPI_10706	chr11	130428606	130428610	chr11:130428606..130428610,-	1559	-	130428609	ENST00000257359.7	ENSG00000134917.10	promoter	ADAMTS8
-2.41654	3.22311	21.2108	4.11445e-06	0.00237757	rDPI_3849	chr1	169734079	169734080	chr1:169734079..169734080,-	12439	-	169734079	ENST00000333360.12	ENSG00000007908.16	promoter	SELE
-1.52021	6.36853	21.1244	4.30418e-06	0.00246539	rDPI_32035	chr2	216633413	216633428	chr2:216633413..216633428,chr2:216633340..216633960,+;peak:chr2:216633420..216633421,+;peakCounts:13329	49362	+	216633420	ENST00000233809.9	ENSG00000115457.10	promoter	IGFBP2
-1.3573	2.18711	20.9186	4.79221e-06	0.00272106	rDPI_29757	chr2	156332713	156332722	chr2:156332713..156332722,chr2:156332643..156332747,-;peak:chr2:156332721..156332722,-;peakCounts:723.7	1561	-	156332721	ENST00000339562.9	ENSG00000153234.15	alternative	NR4A2
0.531439	6.25759	20.8946	4.85259e-06	0.00272238	rDPI_9267	chr11	64317536	64317550	chr11:64317536..64317550,chr11:64317467..64317602,-;peak:chr11:64317536..64317537,-;peakCounts:12420.6	55150	-	64317536	ENST00000539854.1	ENSG00000173113.7	promoter	TRMT112
-0.693664	1.53968	20.8846	4.87793e-06	0.00272238	rDPI_47441	chr7	49774377	49774414	chr7:49774377..49774414,chr7:49774325..49774459,+;peak:chr7:49774388..49774389,+;peakCounts:156.6	914	+	49774388	ENST00000340652.5	ENSG00000188730.5	enhancer	VWC2
-0.771375	1.10176	20.7021	5.36569e-06	0.00296923	rDPI_15452	chr14	34241456	34241460	chr14:34241456..34241460,chr14:34241428..34241500,-;peak:chr14:34241457..34241458,-;peakCounts:174.6	208	-	34241457	ENST00000546681.5	ENSG00000129521.15	enhancer	EGLN3
-1.36635	3.38262	20.5916	5.68453e-06	0.00310831	rDPI_26505	chr19	43670167	43670171	chr19:43670167..43670171,chr19:43670115..43670279,-;peak:chr19:43670169..43670170,-;peakCounts:2848.5	7985	-	43670169	ENST00000340093.8	ENSG00000011422.12	promoter	PLAUR
-1.85937	2.13346	20.5823	5.71222e-06	0.00310831	rDPI_34837	chr22	22880721	22880724	chr22:22880721..22880724,+	1960	+	22880721	ENST00000390319.2	ENSG00000211673.2	promoter	NA
-0.506341	1.69461	20.5047	5.94842e-06	0.00321008	rDPI_53894	chrX	44873172	44873182	chrX:44873172..44873182,chrX:44873155..44873243,+;peak:chrX:44873175..44873176,+;peakCounts:349.8	1040	+	44873175	ENST00000676062.1	ENSG00000147050.16	alternative	KDM6A
-0.708813	2.54396	20.4719	6.05129e-06	0.00323883	rDPI_33236	chr20	34704755	34704763	chr20:34704755..34704763,chr20:34704682..34704793,+;peak:chr20:34704760..34704761,+;peakCounts:1067.4	3103	+	34704760	ENST00000414082.1	ENSG00000078804.13	alternative	TP53INP2
-1.3182	4.15581	20.4303	6.18426e-06	0.00328309	rDPI_13905	chr13	31161898	31161910	chr13:31161898..31161910,chr13:31161487..31162051,-;peak:chr13:31161903..31161904,-;peakCounts:9219.3	17693	-	31161903	ENST00000320027.10	ENSG00000120694.20	alternative	HSPH1
-0.712657	1.73505	20.3891	6.31877e-06	0.00332744	rDPI_39964	chr4	83334840	83334854	chr4:83334840..83334854,chr4:83334811..83334908,-;peak:chr4:83334845..83334846,-;peakCounts:321.3	826	-	83334845	ENST00000311412.10	ENSG00000173083.16	promoter	HPSE
0.820588	2.02893	20.3657	6.39654e-06	0.00334145	rDPI_47993	chr7	94656365	94656371	chr7:94656365..94656371,chr7:94656299..94656375,+;peak:chr7:94656370..94656371,+;peakCounts:961.2	1162	+	94656370	ENST00000488574.5	ENSG00000242265.6	promoter	PEG10
-1.03956	1.8308	20.3372	6.49256e-06	0.00336469	rDPI_50688	chr8	121641414	121641442	chr8:121641414..121641442,-	1020	-	121641439	ENST00000303924.5	ENSG00000170961.7	promoter	HAS2
-1.16417	2.01185	20.3137	6.57287e-06	0.00337949	rDPI_13213	chr12	112907013	112907019	chr12:112907013..112907019,chr12:112906933..112907037,+;peak:chr12:112907018..112907019,+;peakCounts:902.9	1467	+	112907018	ENST00000550689.2	ENSG00000089127.15	alternative	OAS1
-0.602533	1.18605	20.1915	7.00632e-06	0.00357421	rDPI_32033	chr2	216633186	216633204	chr2:216633186..216633204,chr2:216633033..216633274,+;peak:chr2:216633191..216633192,+;peakCounts:194.4	405	+	216633191	ENST00000233809.9	ENSG00000115457.10	alternative	IGFBP2
-0.687383	1.39557	20.1315	7.2297e-06	0.00365957	rDPI_41268	chr5	784696	784703	chr5:784696..784703,chr5:784676..784783,-;peak:chr5:784698..784699,-;peakCounts:196.3	495	-	784698	ENST00000522356.3	ENSG00000206077.14	alternative	ZDHHC11B
0.610381	1.57108	20.114	7.29615e-06	0.0036648	rDPI_20978	chr17	7403735	7403755	chr17:7403735..7403755,chr17:7403665..7403787,-;peak:chr17:7403749..7403750,-;peakCounts:329.4	708	-	7403749	ENST00000575427.1	ENSG00000205544.4	alternative	TMEM256
0.725052	2.62927	20.0644	7.48766e-06	0.00372603	rDPI_9291	chr11	64744859	64744866	chr11:64744859..64744866,chr11:64744771..64744902,-;peak:chr11:64744861..64744862,-;peakCounts:734.5	1831	-	64744861	ENST00000377487.5	ENSG00000068831.19	alternative	RASGRP2
-0.598616	1.14567	20.0531	7.53217e-06	0.00372603	rDPI_6108	chr10	50061655	50061659	chr10:50061655..50061659,chr10:50061643..50061737,-;peak:chr10:50061657..50061658,-;peakCounts:28	198	-	50061657	ENST00000649244.1	ENSG00000235618.8	promoter	FAM21EP
1.61417	6.74438	19.9206	8.07268e-06	0.00396338	rDPI_22005	chr17	42998419	42998444	chr17:42998419..42998444,chr17:42998378..42998558,+;peak:chr17:42998439..42998440,+;peakCounts:15446.7	72676	+	42998439	ENST00000587478.1	ENSG00000131469.15	promoter	RPL27
0.66322	2.08457	19.8487	8.38216e-06	0.00408462	rDPI_29807	chr2	160271252	160271258	chr2:160271252..160271258,chr2:160271218..160271360,-;peak:chr2:160271252..160271253,-;peakCounts:1144.5	1716	-	160271252	ENST00000477514.1	ENSG00000285373.2	alternative	LINC02478
-1.43303	2.81667	19.627	9.41316e-06	0.00455304	rDPI_13217	chr12	112938508	112938518	chr12:112938508..112938518,chr12:112938273..112938602,+;peak:chr12:112938517..112938518,+;peakCounts:1514.7	4053	+	112938517	ENST00000681085.1	ENSG00000111331.14	promoter	OAS3
0.658846	1.26031	19.5592	9.75285e-06	0.00462172	rDPI_34842	chr22	23306745	23306747	chr22:23306745..23306747,+	384	+	23306745	ENST00000475025.5	ENSG00000186716.21	promoter	BCR
1.36516	2.26827	19.5567	9.76557e-06	0.00462172	rDPI_50469	chr8	98020954	98021076	chr8:98020954..98021076,chr8:98020954..98021076,+	2221	+	98021003	ENST00000518370.1	ENSG00000132561.14	promoter	MATN2
-1.05901	1.86496	19.5441	9.83055e-06	0.00462172	rDPI_6207	chr10	62816361	62816369	chr10:62816361..62816369,chr10:62816312..62816407,-;peak:chr10:62816366..62816367,-;peakCounts:719.1	1411	-	62816366	ENST00000242480.4	ENSG00000122877.16	promoter	EGR2
1.05827	1.43599	19.5426	9.83827e-06	0.00462172	rDPI_29624	chr2	134441537	134441544	chr2:134441537..134441544,chr2:134441416..134441627,+;peak:chr2:134441540..134441541,+;peakCounts:583.2	828	+	134441540	ENST00000281923.4	ENSG00000152127.9	alternative	MGAT5
0.632734	1.1356	19.5258	9.92492e-06	0.00462913	rDPI_55202	chrY	20582672	20582680	chrY:20582672..20582680,chrY:20582588..20582680,+;peak:chrY:20582678..20582679,+;peakCounts:185.4	382	+	20582678	ENST00000464196.5	ENSG00000198692.10	enhancer	EIF1AY
-1.32113	3.00926	19.5088	1.00139e-05	0.00463751	rDPI_2134	chr1	78620444	78620454	chr1:78620444..78620454,chr1:78620369..78620510,+;peak:chr1:78620448..78620449,+;peakCounts:2678.4	4270	+	78620448	ENST00000370751.10	ENSG00000137959.17	promoter	IFI44L
0.795908	3.6263	19.3537	1.08611e-05	0.00499442	rDPI_813	chr1	23424716	23424729	chr1:23424716..23424729,chr1:23424559..23424816,-;peak:chr1:23424719..23424720,-;peakCounts:1946.5	6972	-	23424719	ENST00000374601.7	ENSG00000204219.11	alternative	TCEA3
0.829068	1.03607	19.3187	1.1062e-05	0.00505122	rDPI_49339	chr8	11321412	11321418	chr8:11321412..11321418,chr8:11321393..11321448,+;peak:chr8:11321412..11321413,+;peakCounts:153.9	187	+	11321412	ENST00000382435.5	ENSG00000177710.6	alternative	SLC35G5
0.780939	1.56181	19.1707	1.19534e-05	0.00542037	rDPI_19654	chr16	46732314	46732318	chr16:46732314..46732318,chr16:46732214..46732672,-;peak:chr16:46732317..46732318,-;peakCounts:697	955	-	46732317	ENST00000569844.1	ENSG00000140795.13	alternative	MYLK3
-1.06005	1.98393	19.0862	1.24942e-05	0.00560933	rDPI_38905	chr3	195892714	195892732	chr3:195892714..195892732,chr3:195892694..195892757,-;peak:chr3:195892714..195892715,-;peakCounts:411.3	1208	-	195892714	ENST00000673038.1	ENSG00000061938.20	promoter	TNK2
1.08236	1.93596	19.079	1.25419e-05	0.00560933	rDPI_24119	chr18	58044267	58044292	chr18:58044267..58044292,chr18:58044171..58044603,+;peak:chr18:58044286..58044287,+;peakCounts:605.7	1618	+	58044286	ENST00000400345.8	ENSG00000049759.20	promoter	NEDD4L
-1.28594	1.32301	18.9783	1.32214e-05	0.00580149	rDPI_21646	chr17	36103827	36103833	chr17:36103827..36103833,+	2848	+	36103832	ENST00000615863.2	ENSG00000275302.2	promoter	CCL4
-0.896423	2.56769	18.9755	1.32409e-05	0.00580149	rDPI_40858	chr4	158171381	158171387	chr4:158171381..158171387,chr4:158171313..158171628,-;peak:chr4:158171381..158171382,-;peakCounts:2095.2	2702	-	158171381	ENST00000593260.1	ENSG00000164125.16	alternative	GASK1B
-0.810609	2.41129	18.9732	1.32566e-05	0.00580149	rDPI_43669	chr5	176899340	176899347	chr5:176899340..176899347,-	1830	-	176899346	ENST00000292432.10	ENSG00000160883.11	promoter	HK3
-1.46575	1.949	18.9631	1.3327e-05	0.00580149	rDPI_16767	chr14	105987081	105987082	chr14:105987081..105987082,-	1147	-	105987081	ENST00000390594.3	ENSG00000211934.3	promoter	IGHV1-2
0.922671	5.80802	18.9125	1.36855e-05	0.00591814	rDPI_45583	chr6	89721155	89721156	chr6:89721155..89721156,+	36213	+	89721155	ENST00000438877.1	ENSG00000228124.1	enhancer	NA
-1.65404	2.09508	18.7611	1.4816e-05	0.00636483	rDPI_19797	chr16	55760572	55760609	chr16:55760572..55760609,chr16:55760485..55760641,+;peak:chr16:55760585..55760586,+;peakCounts:406.8	2230	+	55760585	ENST00000571348.5	ENSG00000228695.10	promoter	CES1P1
-0.621938	1.99682	18.5889	1.62159e-05	0.00692068	rDPI_47437	chr7	49772866	49772887	chr7:49772866..49772887,chr7:49772801..49772919,+;peak:chr7:49772885..49772886,+;peakCounts:429.3	1647	+	49772885	ENST00000340652.5	ENSG00000188730.5	promoter	VWC2
-1.83882	3.84956	18.5561	1.6498e-05	0.00699535	rDPI_27641	chr2	6877642	6877799	chr2:6877642..6877799,chr2:6877642..6877799,+	8325	+	6877777	ENST00000382040.4	ENSG00000134321.13	promoter	RSAD2
1.01741	1.17018	18.5195	1.68173e-05	0.00708477	rDPI_49967	chr8	46831041	46831042	chr8:46831041..46831042,-	242	-	46831041	ENST00000632801.1	ENSG00000282321.1	enhancer	MTND1P7
0.681078	2.20033	18.4994	1.69959e-05	0.00711409	rDPI_26444	chr19	42070197	42070210	chr19:42070197..42070210,chr19:42070145..42070245,-;peak:chr19:42070206..42070207,-;peakCounts:549.9	1447	-	42070206	ENST00000593562.5	ENSG00000105737.9	promoter	GRIK5
-0.805637	1.38419	18.4552	1.73949e-05	0.00723474	rDPI_47756	chr7	77245523	77245543	chr7:77245523..77245543,chr7:77245476..77245561,-;peak:chr7:77245527..77245528,-;peakCounts:184.5	497	-	77245527	ENST00000476561.2	ENSG00000250990.1	enhancer	NA
-0.752879	2.09091	18.4312	1.76147e-05	0.0072789	rDPI_32810	chr20	3712566	3712577	chr20:3712566..3712577,chr20:3712521..3712642,-;peak:chr20:3712571..3712572,-;peakCounts:1068.3	1393	-	3712571	ENST00000344754.6	ENSG00000088827.13	alternative	SIGLEC1
1.10201	1.20044	18.4194	1.77241e-05	0.0072789	rDPI_18674	chr16	761101	761125	chr16:761101..761125,chr16:761022..761153,+;peak:chr16:761119..761120,+;peakCounts:85.5	438	+	761119	ENST00000563651.5	ENSG00000102854.16	promoter	MSLN
0.570116	1.20235	18.2565	1.93065e-05	0.00783056	rDPI_13112	chr12	110640409	110640420	chr12:110640409..110640420,chr12:110640352..110640457,+;peak:chr12:110640414..110640415,+;peakCounts:319.5	421	+	110640414	ENST00000460357.1	ENSG00000204852.17	enhancer	TCTN1
0.681148	0.889458	18.2564	1.93072e-05	0.00783056	rDPI_6647	chr10	86663802	86663803	chr10:86663802..86663803,+	79	+	86663802	ENST00000623056.4	ENSG00000122367.20	enhancer	LDB3
0.518451	1.22587	18.2419	1.94555e-05	0.00784201	rDPI_21347	chr17	19378533	19378538	chr17:19378533..19378538,chr17:19378457..19378571,+;peak:chr17:19378537..19378538,+;peakCounts:282	462	+	19378537	ENST00000570306.5	ENSG00000166484.20	alternative	MAPK7
0.471467	3.42653	18.2049	1.98372e-05	0.00794679	rDPI_54138	chrX	54808355	54808363	chrX:54808355..54808363,chrX:54808301..54808430,+;peak:chrX:54808357..54808358,+;peakCounts:1245.3	6604	+	54808357	ENST00000375058.5	ENSG00000102316.17	alternative	MAGED2
0.688336	6.32838	18.1151	2.07944e-05	0.00827948	rDPI_54137	chrX	54807741	54807749	chrX:54807741..54807749,chrX:54807648..54807799,+;peak:chrX:54807746..54807747,+;peakCounts:28780.2	60853	+	54807746	ENST00000375068.6	ENSG00000102316.17	promoter	MAGED2
0.616109	3.03252	18.0299	2.17461e-05	0.00860592	rDPI_39571	chr4	48906793	48906803	chr4:48906793..48906803,chr4:48906674..48906836,-;peak:chr4:48906798..48906799,-;peakCounts:659.8	2626	-	48906798	ENST00000514576.5	ENSG00000145247.12	alternative	OCIAD2
0.721823	5.64303	18.0094	2.19822e-05	0.00864353	rDPI_814	chr1	23424738	23424758	chr1:23424738..23424758,chr1:23424559..23424816,-;peak:chr1:23424745..23424746,-;peakCounts:6961.5	26848	-	23424745	ENST00000450454.7	ENSG00000204219.11	promoter	TCEA3
-0.535239	1.55931	17.996	2.21372e-05	0.00864353	rDPI_46969	chr7	21543040	21543061	chr7:21543040..21543061,chr7:21542997..21543083,+;peak:chr7:21543046..21543047,+;peakCounts:244.8	763	+	21543046	ENST00000409508.8	ENSG00000105877.18	promoter	DNAH11
-1.87989	2.59206	17.9768	2.23609e-05	0.00864353	rDPI_34815	chr22	22322454	22322457	chr22:22322454..22322457,+	2715	+	22322455	ENST00000390290.3	ENSG00000211644.3	promoter	IGLV1-51
-0.754301	1.59164	17.9722	2.24154e-05	0.00864353	rDPI_5544	chr10	7541423	7541446	chr10:7541423..7541446,chr10:7541342..7541562,+;peak:chr10:7541423..7541424,+;peakCounts:126.9	797	+	7541423	ENST00000414631.1	ENSG00000230121.1	alternative	NA
-0.612726	5.74752	17.9635	2.25187e-05	0.00864353	rDPI_3089	chr1	151146625	151146632	chr1:151146625..151146632,chr1:151146568..151146729,-;peak:chr1:151146628..151146629,-;peakCounts:11856.6	25964	-	151146628	ENST00000368914.8	ENSG00000143434.16	promoter	SEMA6C
-1.27683	1.36413	17.9536	2.26354e-05	0.00864353	rDPI_50880	chr8	142614476	142614480	chr8:142614476..142614480,-	2842	-	142614477	ENST00000356613.4	ENSG00000198576.4	promoter	ARC
-1.40171	2.31827	17.9371	2.28325e-05	0.0086681	rDPI_29756	chr2	156332679	156332691	chr2:156332679..156332691,chr2:156332643..156332747,-;peak:chr2:156332684..156332685,-;peakCounts:1037.7	1883	-	156332684	ENST00000424077.1	ENSG00000153234.15	promoter	NR4A2
0.674799	1.29975	17.9161	2.30864e-05	0.00871385	rDPI_34652	chr22	17158979	17158984	chr22:17158979..17158984,chr22:17158872..17159077,-;peak:chr22:17158981..17158982,-;peakCounts:73.5	480	-	17158981	ENST00000463033.1	ENSG00000069998.12	alternative	HDHD5
-1.71335	2.39705	17.8962	2.3329e-05	0.00873562	rDPI_21056	chr17	7844201	7844207	chr17:7844201..7844207,chr17:7844138..7844360,+;peak:chr17:7844201..7844202,+;peakCounts:2859.3	3907	+	7844201	ENST00000575521.1	ENSG00000132510.11	promoter	KDM6B
-0.869886	1.72179	17.8894	2.34116e-05	0.00873562	rDPI_43354	chr5	151676145	151676157	chr5:151676145..151676157,chr5:151676144..151676206,-;peak:chr5:151676145..151676146,-;peakCounts:342.9	906	-	151676145	ENST00000524277.1	ENSG00000113140.11	enhancer	SPARC
0.746366	2.57283	17.8471	2.3938e-05	0.00888126	rDPI_29105	chr2	95025703	95025709	chr2:95025703..95025709,chr2:95025626..95025774,+;peak:chr2:95025708..95025709,+;peakCounts:2190.6	2636	+	95025708	ENST00000309988.9	ENSG00000172005.11	promoter	MAL
0.611597	1.13786	17.7343	2.54006e-05	0.00937066	rDPI_55174	chrY	12421580	12421587	chrY:12421580..12421587,chrY:12421536..12421620,-;peak:chrY:12421583..12421584,-;peakCounts:226.6	339	-	12421583	ENST00000651835.1	ENSG00000206159.11	alternative	GYG2P1
-0.820568	1.43566	17.698	2.58896e-05	0.00949742	rDPI_19711	chr16	49281796	49281802	chr16:49281796..49281802,chr16:49281771..49281910,-;peak:chr16:49281796..49281797,-;peakCounts:794.7	963	-	49281796	ENST00000219197.11	ENSG00000102924.12	promoter	CBLN1
0.585433	3.58355	17.643	2.6649e-05	0.00972137	rDPI_12756	chr12	102061979	102061986	chr12:102061979..102061986,chr12:102061953..102062134,-;peak:chr12:102061982..102061983,-;peakCounts:2731.7	4425	-	102061982	ENST00000541569.5	ENSG00000120860.11	alternative	WASHC3
-1.17938	2.14009	17.5534	2.79351e-05	0.0101339	rDPI_29125	chr2	96145440	96145441	chr2:96145440..96145441,-	2449	-	96145440	ENST00000288943.5	ENSG00000158050.5	promoter	DUSP2
-0.547003	2.39634	17.5352	2.8204e-05	0.0101749	rDPI_53895	chrX	44873184	44873204	chrX:44873184..44873204,chrX:44873155..44873243,+;peak:chrX:44873199..44873200,+;peakCounts:856.8	2106	+	44873199	ENST00000676062.1	ENSG00000147050.16	promoter	KDM6A
1.05495	1.16577	17.5167	2.84801e-05	0.0102181	rDPI_47743	chr7	76510529	76510540	chr7:76510529..76510540,chr7:76510516..76510587,+;peak:chr7:76510534..76510535,+;peakCounts:101.8	335	+	76510534	ENST00000257632.9	ENSG00000243566.7	alternative	UPK3B
-0.477432	7.16717	17.4651	2.92629e-05	0.0104416	rDPI_53862	chrX	41334095	41334301	chrX:41334095..41334301,chrX:41334095..41334301,+	86011	+	41334162	ENST00000480592.6	ENSG00000215301.11	promoter	DDX3X
-1.46885	1.64343	17.4188	2.99845e-05	0.0106409	rDPI_16792	chr14	106627715	106627720	chr14:106627715..106627720,-	1270	-	106627717	ENST00000390629.3	ENSG00000224373.3	enhancer	IGHV4-59
-1.35181	1.27209	17.3968	3.03338e-05	0.0107067	rDPI_17856	chr15	67840045	67840048	chr15:67840045..67840048,+	492	+	67840047	ENST00000560577.1	ENSG00000259410.5	promoter	NA
0.957348	1.92805	17.364	3.08612e-05	0.0108102	rDPI_33382	chr20	37261776	37261799	chr20:37261776..37261799,chr20:37261749..37261897,-;peak:chr20:37261786..37261787,-;peakCounts:434.1	1055	-	37261786	ENST00000373614.7	ENSG00000118702.10	promoter	GHRH
-1.2022	3.72865	17.3542	3.10212e-05	0.0108102	rDPI_23238	chr17	80263591	80263673	chr17:80263591..80263673,chr17:80263591..80263673,+	6979	+	80263647	ENST00000319921.4	ENSG00000173821.19	enhancer	RNF213
0.719268	2.45452	17.3479	3.11238e-05	0.0108102	rDPI_17773	chr15	65076173	65076182	chr15:65076173..65076182,chr15:65076161..65076217,+;peak:chr15:65076179..65076180,+;peakCounts:765.9	2060	+	65076179	ENST00000432196.5	ENSG00000234438.5	promoter	KBTBD13
-0.623375	1.2165	17.2998	3.19213e-05	0.0110285	rDPI_29167	chr2	96842701	96842707	chr2:96842701..96842707,chr2:96842567..96842746,-;peak:chr2:96842706..96842707,-;peakCounts:59.9	372	-	96842706	ENST00000476975.5	ENSG00000163126.15	alternative	ANKRD23
0.815815	2.76604	17.2382	3.29736e-05	0.0113322	rDPI_27622	chr2	3533925	3533936	chr2:3533925..3533936,chr2:3533826..3533991,-;peak:chr2:3533935..3533936,-;peakCounts:1286.2	3053	-	3533935	ENST00000439547.5	ENSG00000242282.6	alternative	NA
0.505077	1.34656	17.1743	3.4101e-05	0.0116583	rDPI_1098	chr1	29260147	29260163	chr1:29260147..29260163,chr1:29260111..29260190,+;peak:chr1:29260157..29260158,+;peakCounts:204.3	504	+	29260157	ENST00000527027.1	ENSG00000060656.20	promoter	PTPRU
0.566775	1.65649	17.1262	3.49757e-05	0.011895	rDPI_24253	chr18	74598799	74598805	chr18:74598799..74598805,chr18:74598716..74598826,-;peak:chr18:74598804..74598805,-;peakCounts:517.5	939	-	74598804	ENST00000657978.1	ENSG00000264247.2	alternative	LINC00909
-0.938476	2.37181	17.0213	3.69624e-05	0.0125055	rDPI_46105	chr6	136114900	136114927	chr6:136114900..136114927,chr6:136114883..136114974,-;peak:chr6:136114912..136114913,-;peakCounts:481.5	1961	-	136114912	ENST00000615571.1	ENSG00000237596.7	promoter	LOC644135
-0.556617	2.31089	17.0008	3.73649e-05	0.0125766	rDPI_18863	chr16	2883297	2883305	chr16:2883297..2883305,chr16:2883152..2883353,+;peak:chr16:2883303..2883304,+;peakCounts:212.9	2217	+	2883303	ENST00000572006.1	ENSG00000162076.13	alternative	FLYWCH2
-1.26431	2.62109	16.9786	3.78028e-05	0.0126587	rDPI_6759	chr10	89327994	89328000	chr10:89327994..89328000,chr10:89327859..89328041,+;peak:chr10:89327999..89328000,+;peakCounts:1655.1	2855	+	89327999	ENST00000679923.1	ENSG00000119917.15	promoter	IFIT3
2.3324	4.27121	16.9099	3.91963e-05	0.0130584	rDPI_4120	chr1	186296279	186296281	chr1:186296279..186296281,chr1:186296186..186296287,+;peak:chr1:186296280..186296281,+;peakCounts:5523.3	7686	+	186296280	ENST00000533951.5	ENSG00000116690.13	promoter	PRG4
-0.834616	1.17315	16.896	3.94849e-05	0.0130877	rDPI_31683	chr2	196927485	196927503	chr2:196927485..196927503,-	356	-	196927485	ENST00000409188.5	ENSG00000197121.15	enhancer	PGAP1
0.676386	1.8899	16.8849	3.97155e-05	0.0130977	rDPI_24120	chr18	58044352	58044389	chr18:58044352..58044389,chr18:58044171..58044603,+;peak:chr18:58044378..58044379,+;peakCounts:266.7	1341	+	58044378	ENST00000356462.10	ENSG00000049759.20	alternative	NEDD4L
-0.672245	1.2815	16.7889	4.17775e-05	0.0137085	rDPI_45105	chr6	43062055	43062068	chr6:43062055..43062068,chr6:43062031..43062129,+;peak:chr6:43062060..43062061,+;peakCounts:205.2	453	+	43062060	ENST00000472172.1	ENSG00000137171.15	not_classified	KLC4
0.637937	0.972568	16.7586	4.24489e-05	0.0137942	rDPI_11451	chr12	31145229	31145240	chr12:31145229..31145240,chr12:31145220..31145290,-;peak:chr12:31145234..31145235,-;peakCounts:77.4	116	-	31145234	ENST00000643651.1	ENSG00000177359.20	enhancer	OVOS2
0.614297	1.8584	16.7581	4.24611e-05	0.0137942	rDPI_48596	chr7	128323592	128323597	chr7:128323592..128323597,chr7:128323558..128323677,-;peak:chr7:128323593..128323594,-;peakCounts:754.2	1200	-	128323593	ENST00000481788.1	ENSG00000106344.8	enhancer	RBM28
0.720276	3.54429	16.7309	4.30733e-05	0.0139238	rDPI_44303	chr6	26216659	26216666	chr6:26216659..26216666,chr6:26216654..26216713,-;peak:chr6:26216659..26216660,-;peakCounts:4097.7	5568	-	26216659	ENST00000541790.3	ENSG00000273802.2	promoter	H2BC8
-0.810836	1.54846	16.6929	4.3945e-05	0.0140436	rDPI_11114	chr12	9284002	9284037	chr12:9284002..9284037,+	890	+	9284033	ENST00000539757.1	ENSG00000111788.10	enhancer	NA
0.488111	5.39112	16.6861	4.4103e-05	0.0140436	rDPI_20369	chr16	84116912	84116943	chr16:84116912..84116943,chr16:84116740..84117020,-;peak:chr16:84116922..84116923,-;peakCounts:2551.1	23220	-	84116922	ENST00000343411.8	ENSG00000140943.17	alternative	MBTPS1
-0.793602	3.0389	16.6826	4.41854e-05	0.0140436	rDPI_41582	chr5	39424953	39424965	chr5:39424953..39424965,chr5:39424839..39425231,-;peak:chr5:39424959..39424960,-;peakCounts:2081.9	3833	-	39424959	ENST00000502388.1	ENSG00000153071.15	alternative	DAB2
-0.641139	1.13	16.6775	4.43042e-05	0.0140436	rDPI_21049	chr17	7836333	7836338	chr17:7836333..7836338,-	392	-	7836337	ENST00000576384.1	ENSG00000183011.13	ambiguous	NAA38
0.580017	1.08129	16.6499	4.49536e-05	0.0141806	rDPI_46451	chr6	158810471	158810482	chr6:158810471..158810482,chr6:158810459..158810550,-;peak:chr6:158810476..158810477,-;peakCounts:158.4	202	-	158810476	ENST00000337147.11	ENSG00000092820.18	enhancer	EZR
-0.640747	0.969099	16.5793	4.66585e-05	0.0146476	rDPI_23761	chr18	24326684	24326719	chr18:24326684..24326719,+	172	+	24326691	ENST00000390762.1	ENSG00000212051.1	alternative	NA
1.06644	1.79516	16.521	4.81152e-05	0.0150327	rDPI_29623	chr2	134441524	134441532	chr2:134441524..134441532,chr2:134441416..134441627,+;peak:chr2:134441527..134441528,+;peakCounts:619.2	1318	+	134441527	ENST00000281923.4	ENSG00000152127.9	enhancer	MGAT5
-0.558135	3.9889	16.4836	4.90715e-05	0.0152584	rDPI_18861	chr16	2883260	2883276	chr16:2883260..2883276,chr16:2883152..2883353,+;peak:chr16:2883265..2883266,+;peakCounts:4257.9	9995	+	2883265	ENST00000572006.1	ENSG00000162076.13	promoter	FLYWCH2
-0.977052	2.63317	16.3589	5.241e-05	0.0162193	rDPI_47332	chr7	44139842	44139850	chr7:44139842..44139850,chr7:44139771..44139867,-;peak:chr7:44139848..44139849,-;peakCounts:356.7	1614	-	44139848	ENST00000446581.5	ENSG00000106631.8	alternative	MYL7
-1.50529	2.2527	16.3134	5.36817e-05	0.0164777	rDPI_42239	chr5	83096136	83096163	chr5:83096136..83096163,chr5:83096016..83096241,+;peak:chr5:83096157..83096158,+;peakCounts:591.3	1929	+	83096157	ENST00000509268.1	ENSG00000152422.16	enhancer	XRCC4
-1.6577	3.17813	16.311	5.37498e-05	0.0164777	rDPI_29717	chr2	151357592	151357593	chr2:151357592..151357593,+	8695	+	151357592	ENST00000243347.5	ENSG00000123610.5	promoter	TNFAIP6
0.402979	2.79026	16.2859	5.44665e-05	0.016607	rDPI_46107	chr6	136289782	136289790	chr6:136289782..136289790,chr6:136289775..136289870,-;peak:chr6:136289787..136289788,-;peakCounts:1899.7	3145	-	136289787	ENST00000530429.5	ENSG00000029363.17	alternative	BCLAF1
0.444733	1.54435	16.2785	5.468e-05	0.016607	rDPI_36344	chr3	37861779	37861790	chr3:37861779..37861790,chr3:37861717..37861803,-;peak:chr3:37861783..37861784,-;peakCounts:339.3	582	-	37861783	ENST00000657484.1	ENSG00000235257.9	alternative	ITGA9-AS1
0.586763	1.5269	16.2291	5.6124e-05	0.0169505	rDPI_7809	chr11	504950	504961	chr11:504950..504961,chr11:504831..504998,-;peak:chr11:504955..504956,-;peakCounts:101	667	-	504955	ENST00000529368.5	ENSG00000023191.17	alternative	RNH1
-0.53431	1.93679	16.2143	5.65654e-05	0.0169505	rDPI_33235	chr20	34704741	34704747	chr20:34704741..34704747,chr20:34704682..34704793,+;peak:chr20:34704743..34704744,+;peakCounts:602.4	1587	+	34704743	ENST00000414082.1	ENSG00000078804.13	alternative	TP53INP2
-0.887563	1.31251	16.2135	5.659e-05	0.0169505	rDPI_44548	chr6	31575565	31575569	chr6:31575565..31575569,+	888	+	31575565	ENST00000449264.3	ENSG00000232810.4	promoter	TNF
-0.526141	1.09736	16.1859	5.74204e-05	0.0171207	rDPI_36043	chr3	14556023	14556034	chr3:14556023..14556034,chr3:14555915..14556079,-;peak:chr3:14556028..14556029,-;peakCounts:159.3	242	-	14556028	ENST00000637939.1	ENSG00000144596.13	promoter	GRIP2
-1.26294	2.68364	16.1586	5.82522e-05	0.0172549	rDPI_13221	chr12	112978563	112978584	chr12:112978563..112978584,chr12:112978392..112978623,+;peak:chr12:112978576..112978577,+;peakCounts:1056.6	2991	+	112978576	ENST00000680122.1	ENSG00000111335.14	promoter	OAS2
-1.02131	2.07871	16.1539	5.83988e-05	0.0172549	rDPI_13215	chr12	112938491	112938499	chr12:112938491..112938499,chr12:112938273..112938602,+;peak:chr12:112938494..112938495,+;peakCounts:1019.7	1594	+	112938494	ENST00000681147.1	ENSG00000111331.14	alternative	OAS3
0.788803	3.68388	16.1397	5.88378e-05	0.0173063	rDPI_37965	chr3	129278979	129279000	chr3:129278979..129279000,chr3:129278799..129279126,+;peak:chr3:129278994..129278995,+;peakCounts:2827.8	6759	+	129278994	ENST00000509551.5	ENSG00000183624.14	alternative	HMCES
0.686999	2.57517	16.0861	6.05258e-05	0.0176605	rDPI_37648	chr3	119294037	119294043	chr3:119294037..119294043,chr3:119293997..119294275,+;peak:chr3:119294037..119294038,+;peakCounts:2054.7	2346	+	119294037	ENST00000264245.9	ENSG00000031081.11	enhancer	ARHGAP31
-0.959736	2.84629	16.0766	6.08314e-05	0.0176605	rDPI_29165	chr2	96842646	96842675	chr2:96842646..96842675,chr2:96842567..96842746,-;peak:chr2:96842661..96842662,-;peakCounts:467.9	2376	-	96842661	ENST00000476975.5	ENSG00000163126.15	enhancer	ANKRD23
-0.561572	1.01376	16.0759	6.08536e-05	0.0176605	rDPI_47754	chr7	77245478	77245483	chr7:77245478..77245483,chr7:77245476..77245561,-;peak:chr7:77245478..77245479,-;peakCounts:141.5	173	-	77245478	ENST00000476561.2	ENSG00000250990.1	alternative	NA
-0.901028	1.03459	16.0472	6.17823e-05	0.0178507	rDPI_48799	chr7	134828242	134828243	chr7:134828242..134828243,+	213	+	134828242	ENST00000489019.6	ENSG00000122786.20	enhancer	CALD1
2.07536	4.68467	16.0296	6.23598e-05	0.0179382	rDPI_34050	chr21	6499238	6499259	chr21:6499238..6499259,-	7962	-	6499245	ENST00000610664.5	ENSG00000275895.7	promoter	U2AF1L5
0.728733	1.68076	15.961	6.46618e-05	0.0185188	rDPI_17476	chr15	52235932	52235954	chr15:52235932..52235954,-	629	-	52235953	ENST00000559434.1	ENSG00000128833.13	enhancer	MYO5C
-0.514391	4.78995	15.9217	6.60188e-05	0.0188249	rDPI_29598	chr2	131105328	131105338	chr2:131105328..131105338,chr2:131105270..131105392,+;peak:chr2:131105336..131105337,+;peakCounts:8876.7	18257	+	131105336	ENST00000487980.5	ENSG00000115762.16	promoter	PLEKHB2
-0.584879	4.90362	15.8944	6.69756e-05	0.0190147	rDPI_54313	chrX	73944337	73944347	chrX:73944337..73944347,chrX:73944311..73944375,+;peak:chrX:73944342..73944343,+;peakCounts:5505.3	19227	+	73944342	ENST00000602895.6	ENSG00000225470.8	promoter	JPX
0.44101	4.19549	15.8634	6.80832e-05	0.0192454	rDPI_42799	chr5	134738543	134738553	chr5:134738543..134738553,chr5:134738480..134738628,+;peak:chr5:134738548..134738549,+;peakCounts:5814.9	10254	+	134738548	ENST00000297156.4	ENSG00000164615.6	promoter	CAMLG
-0.565511	2.86698	15.8156	6.98236e-05	0.0194665	rDPI_22975	chr17	75289388	75289409	chr17:75289388..75289409,chr17:75289371..75289458,-;peak:chr17:75289398..75289399,-;peakCounts:619.2	3040	-	75289398	ENST00000442286.6	ENSG00000125454.12	promoter	SLC25A19
-0.92633	2.63983	15.808	7.01059e-05	0.0194665	rDPI_29166	chr2	96842677	96842695	chr2:96842677..96842695,chr2:96842567..96842746,-;peak:chr2:96842682..96842683,-;peakCounts:828.9	2264	-	96842682	ENST00000476975.5	ENSG00000163126.15	alternative	ANKRD23
0.532564	1.52033	15.8058	7.01873e-05	0.0194665	rDPI_27686	chr2	10043316	10043332	chr2:10043316..10043332,chr2:10043304..10043457,-;peak:chr2:10043326..10043327,-;peakCounts:276.3	655	-	10043326	ENST00000567540.1	ENSG00000260077.1	promoter	NA
0.544738	1.01832	15.8013	7.03529e-05	0.0194665	rDPI_6072	chr10	48274806	48274816	chr10:48274806..48274816,chr10:48274755..48274899,-;peak:chr10:48274810..48274811,-;peakCounts:79	140	-	48274810	ENST00000374201.8	ENSG00000170324.21	alternative	FRMPD2
-1.44547	5.29287	15.8013	7.03559e-05	0.0194665	rDPI_62	chr1	1013496	1013498	chr1:1013496..1013498,chr1:1013435..1013551,+;peak:chr1:1013497..1013498,+;peakCounts:21535.2	25392	+	1013497	ENST00000649529.1	ENSG00000187608.10	promoter	ISG15
-0.998192	1.23936	15.7831	7.10325e-05	0.0195708	rDPI_29419	chr2	113127595	113127599	chr2:113127595..113127599,+	1286	+	113127598	ENST00000409930.4	ENSG00000136689.19	promoter	IL1RN
-1.01572	1.02963	15.7341	7.28997e-05	0.0200009	rDPI_3691	chr1	161549741	161549764	chr1:161549741..161549764,-	175	-	161549755	ENST00000476031.1	ENSG00000203747.12	alternative	FCGR3A
0.730645	2.10627	15.7031	7.41028e-05	0.0202459	rDPI_54481	chrX	103310966	103310975	chrX:103310966..103310975,chrX:103310927..103311049,-;peak:chrX:103310970..103310971,-;peakCounts:142.9	1035	-	103310970	ENST00000536889.1	ENSG00000133134.12	alternative	BEX2
-0.893909	2.90441	15.6643	7.56366e-05	0.0205788	rDPI_6165	chr10	58999638	58999644	chr10:58999638..58999644,chr10:58999559..58999676,+;peak:chr10:58999643..58999644,+;peakCounts:1714.5	3586	+	58999643	ENST00000661278.1	ENSG00000237949.2	alternative	NA
0.539353	6.86126	15.6263	7.71746e-05	0.0209101	rDPI_3804	chr1	167936693	167936701	chr1:167936693..167936701,chr1:167936547..167937002,+;peak:chr1:167936696..167936697,+;peakCounts:123803.1	152663	+	167936696	ENST00000312263.10	ENSG00000143164.15	promoter	DCAF6
-1.05217	3.18508	15.5516	8.0282e-05	0.0216622	rDPI_13212	chr12	112906959	112906983	chr12:112906959..112906983,chr12:112906933..112907037,+;peak:chr12:112906973..112906974,+;peakCounts:1962.9	5046	+	112906973	ENST00000681831.1	ENSG00000089127.15	promoter	OAS1
-0.584567	3.18493	15.5266	8.13531e-05	0.0217735	rDPI_52421	chr9	113594139	113594144	chr9:113594139..113594144,chr9:113594073..113594239,+;peak:chr9:113594141..113594142,+;peakCounts:2772.7	4520	+	113594141	ENST00000497435.1	ENSG00000138835.22	alternative	RGS3
0.57474	1.67227	15.5264	8.13612e-05	0.0217735	rDPI_37964	chr3	129278965	129278970	chr3:129278965..129278970,chr3:129278799..129279126,+;peak:chr3:129278967..129278968,+;peakCounts:195.8	837	+	129278967	ENST00000389735.7	ENSG00000183624.14	alternative	HMCES
-1.41137	3.48986	15.4941	8.27633e-05	0.0219748	rDPI_34480	chr21	41426240	41426241	chr21:41426240..41426241,chr21:41426116..41426323,+;peak:chr21:41426240..41426241,+;peakCounts:5687.1	6319	+	41426240	ENST00000679528.1	ENSG00000157601.15	promoter	MX1
0.44718	3.68036	15.4936	8.27865e-05	0.0219748	rDPI_20368	chr16	84116901	84116911	chr16:84116901..84116911,chr16:84116740..84117020,-;peak:chr16:84116905..84116906,-;peakCounts:4717.1	7039	-	84116905	ENST00000343411.8	ENSG00000140943.17	alternative	MBTPS1
1.04882	3.13505	15.4846	8.31818e-05	0.0219903	rDPI_16860	chr15	26773055	26773070	chr15:26773055..26773070,chr15:26772997..26773152,-;peak:chr15:26773064..26773065,-;peakCounts:1225.8	3257	-	26773064	ENST00000311550.10	ENSG00000166206.15	promoter	GABRB3
-0.872652	2.99985	15.4338	8.54463e-05	0.0224979	rDPI_10801	chr12	2052984	2052993	chr12:2052984..2052993,chr12:2052955..2053116,+;peak:chr12:2052987..2052988,+;peakCounts:2348.1	4936	+	2052987	ENST00000327702.12	ENSG00000151067.22	promoter	CACNA1C
0.808381	1.68949	15.4128	8.64008e-05	0.0226578	rDPI_38250	chr3	149221824	149221835	chr3:149221824..149221835,chr3:149221822..149221945,-;peak:chr3:149221824..149221825,-;peakCounts:278.1	693	-	149221824	ENST00000481169.5	ENSG00000047457.14	promoter	CP
0.606434	1.33085	15.3767	8.80653e-05	0.0230019	rDPI_29628	chr2	134719013	134719020	chr2:134719013..134719020,chr2:134718953..134719104,-;peak:chr2:134719016..134719017,-;peakCounts:78.8	349	-	134719016	ENST00000281924.6	ENSG00000152128.13	alternative	TMEM163
-0.522747	1.35463	15.3687	8.84391e-05	0.0230076	rDPI_7983	chr11	2302022	2302039	chr11:2302022..2302039,chr11:2301979..2302144,+;peak:chr11:2302027..2302028,+;peakCounts:305.1	625	+	2302027	ENST00000493924.5	ENSG00000064201.16	promoter	TSPAN32
-1.16862	5.91635	15.3515	8.92521e-05	0.0231269	rDPI_44621	chr6	31827736	31827739	chr6:31827736..31827739,chr6:31827728..31827820,+;peak:chr6:31827737..31827738,+;peakCounts:12424.5	36222	+	31827737	ENST00000375650.5	ENSG00000204388.7	promoter	HSPA1B
1.7434	2.44262	15.3218	9.06654e-05	0.0234003	rDPI_21883	chr17	41528308	41528309	chr17:41528308..41528309,-	2849	-	41528308	ENST00000361566.7	ENSG00000171345.13	promoter	KRT19
-0.51668	1.47523	15.2929	9.20596e-05	0.0236666	rDPI_19726	chr16	50274143	50274160	chr16:50274143..50274160,chr16:50274119..50274185,+;peak:chr16:50274148..50274149,+;peakCounts:330.3	821	+	50274148	ENST00000566761.2	ENSG00000121281.13	promoter	ADCY7
-1.75271	3.02231	15.2548	9.39369e-05	0.0240545	rDPI_6787	chr10	90912393	90912404	chr10:90912393..90912404,chr10:90912333..90912982,-;peak:chr10:90912398..90912399,-;peakCounts:860.7	2938	-	90912398	ENST00000371697.4	ENSG00000148677.7	alternative	ANKRD1
-1.24358	1.20011	15.2051	9.64451e-05	0.0246003	rDPI_37211	chr3	63863977	63863983	chr3:63863977..63863983,chr3:63863977..63864178,-;peak:chr3:63863977..63863978,-;peakCounts:142.9	220	-	63863977	ENST00000469584.5	ENSG00000163634.12	alternative	THOC7
-1.53865	1.61571	15.1789	9.77908e-05	0.0248465	rDPI_34095	chr21	8398270	8398291	chr21:8398270..8398291,chr21:8398254..8398363,+;peak:chr21:8398278..8398279,+;peakCounts:409.5	1165	+	8398278	ENST00000613359.1	ENSG00000275215.1	alternative	RNA5-8SN3
-1.02627	1.05782	15.1357	0.000100054	0.0253229	rDPI_34559	chr21	44872688	44872691	chr21:44872688..44872691,+	462	+	44872690	ENST00000441379.5	ENSG00000227039.6	enhancer	ITGB2-AS1
-0.570761	1.60588	15.1264	0.000100545	0.025349	rDPI_35659	chr22	45310107	45310120	chr22:45310107..45310120,chr22:45310062..45310138,+;peak:chr22:45310119..45310120,+;peakCounts:431.1	1080	+	45310119	ENST00000405673.5	ENSG00000100376.12	alternative	FAM118A
0.596494	5.99192	15.1068	0.000101596	0.0254122	rDPI_5188	chr1	236142534	236142554	chr1:236142534..236142554,chr1:236142405..236142606,+;peak:chr1:236142553..236142554,+;peakCounts:15019.2	43705	+	236142553	ENST00000366592.8	ENSG00000077585.14	promoter	GPR137B
-1.28405	6.5012	15.0963	0.000102161	0.0254122	rDPI_417	chr1	11845970	11845999	chr1:11845970..11845999,chr1:11845740..11846022,-;peak:chr1:11845990..11845991,-;peakCounts:10945.8	39583	-	11845990	ENST00000610706.1	ENSG00000175206.10	enhancer	NPPA
-0.934044	1.39282	15.0941	0.000102281	0.0254122	rDPI_38111	chr3	138010250	138010261	chr3:138010250..138010261,chr3:138010097..138010401,+;peak:chr3:138010255..138010256,+;peakCounts:318.7	458	+	138010255	ENST00000479660.1	ENSG00000066405.13	alternative	CLDN18
0.401996	4.26963	15.0928	0.000102352	0.0254122	rDPI_54902	chrX	136497548	136497567	chrX:136497548..136497567,chrX:136497466..136497652,+;peak:chrX:136497561..136497562,+;peakCounts:6356.7	16766	+	136497561	ENST00000218364.5	ENSG00000102241.12	alternative	HTATSF1
1.78519	2.70028	15.0825	0.000102911	0.0254542	rDPI_20228	chr16	72073248	72073249	chr16:72073248..72073249,+	3476	+	72073248	ENST00000561690.1	ENSG00000261701.8	enhancer	HPR
0.888905	1.14866	15.0678	0.00010372	0.0255573	rDPI_27590	chr2	288708	288714	chr2:288708..288714,-	327	-	288712	ENST00000452023.1	ENSG00000189292.16	enhancer	ALKAL2
0.530093	1.02791	15.0186	0.00010646	0.0261338	rDPI_37969	chr3	129344109	129344122	chr3:129344109..129344122,chr3:129344079..129344191,+;peak:chr3:129344116..129344117,+;peakCounts:134.1	208	+	129344116	ENST00000603123.1	ENSG00000270773.1	enhancer	LOC100421508
-0.638932	2.16481	15.0109	0.000106893	0.0261419	rDPI_8921	chr11	59212888	59212897	chr11:59212888..59212897,chr11:59212816..59212985,-;peak:chr11:59212891..59212892,-;peakCounts:625.2	1421	-	59212891	ENST00000361050.4	ENSG00000197629.6	alternative	MPEG1
-0.882842	2.39996	14.9986	0.000107592	0.0262147	rDPI_47331	chr7	44139820	44139826	chr7:44139820..44139826,chr7:44139771..44139867,-;peak:chr7:44139822..44139823,-;peakCounts:634.7	1264	-	44139822	ENST00000446581.5	ENSG00000106631.8	alternative	MYL7
-1.70062	3.10042	14.9904	0.000108062	0.0262314	rDPI_5025	chr1	229431594	229431636	chr1:229431594..229431636,chr1:229431415..229431652,-;peak:chr1:229431599..229431600,-;peakCounts:1042.2	4788	-	229431599	ENST00000366684.7	ENSG00000143632.14	alternative	ACTA1
-1.08318	1.67816	14.9737	0.000109018	0.0263653	rDPI_441	chr1	11858372	11858383	chr1:11858372..11858383,chr1:11858217..11858495,-;peak:chr1:11858377..11858378,-;peakCounts:65	736	-	11858377	ENST00000376468.4	ENSG00000120937.9	alternative	NPPB
0.57484	1.01154	14.9596	0.000109837	0.0264654	rDPI_14728	chr14	22489300	22489307	chr14:22489300..22489307,chr14:22489231..22489504,+;peak:chr14:22489303..22489304,+;peakCounts:54.6	172	+	22489303	ENST00000390488.1	ENSG00000211840.1	alternative	TRAJ49
-0.645773	0.902829	14.9026	0.000113204	0.0271406	rDPI_34116	chr21	8400127	8400134	chr21:8400127..8400134,chr21:8400047..8400165,+;peak:chr21:8400130..8400131,+;peakCounts:70	86	+	8400130	ENST00000613359.1	ENSG00000275215.1	alternative	RNA5-8SN3
-1.5935	2.92776	14.8967	0.00011356	0.0271406	rDPI_21642	chr17	36064272	36064273	chr17:36064272..36064273,chr17:36064220..36064294,+;peak:chr17:36064272..36064273,+;peakCounts:2888.1	3209	+	36064272	ENST00000616054.2	ENSG00000275385.2	promoter	CCL18
-0.998313	1.59486	14.8909	0.000113912	0.0271406	rDPI_38112	chr3	138010263	138010274	chr3:138010263..138010274,chr3:138010097..138010401,+;peak:chr3:138010268..138010269,+;peakCounts:458.7	617	+	138010268	ENST00000479660.1	ENSG00000066405.13	promoter	CLDN18
-0.80029	1.6688	14.8844	0.000114302	0.0271406	rDPI_782	chr1	22637606	22637644	chr1:22637606..22637644,chr1:22637606..22637775,+;peak:chr1:22637633..22637634,+;peakCounts:198	1000	+	22637633	ENST00000402322.1	ENSG00000173372.17	promoter	C1QA
1.19053	1.52543	14.8662	0.000115411	0.0273048	rDPI_26696	chr19	46133326	46133335	chr19:46133326..46133335,-	310	-	46133326	ENST00000558095.2	ENSG00000259339.2	enhancer	NA
-0.910683	1.13082	14.8426	0.000116865	0.027549	rDPI_16864	chr15	28589486	28589511	chr15:28589486..28589511,+	229	+	28589486	ENST00000507787.1	ENSG00000206149.10	promoter	HERC2P9
-0.595823	2.14322	14.7763	0.00012105	0.0284328	rDPI_47421	chr7	47453253	47453282	chr7:47453253..47453282,chr7:47453188..47453337,-;peak:chr7:47453276..47453277,-;peakCounts:574.2	1645	-	47453276	ENST00000413551.1	ENSG00000136205.17	promoter	TNS3
-1.45684	3.4334	14.7214	0.000124623	0.0291672	rDPI_6760	chr10	89332529	89332531	chr10:89332529..89332531,chr10:89332476..89332565,+;peak:chr10:89332529..89332530,+;peakCounts:5230.8	6014	+	89332529	ENST00000679897.1	ENSG00000119917.15	promoter	IFIT3
-1.30857	1.76909	14.6718	0.000127945	0.0298376	rDPI_34819	chr22	22369605	22369619	chr22:22369605..22369619,+	1111	+	22369614	ENST00000390295.3	ENSG00000211649.3	promoter	IGLV7-46
0.579008	3.34593	14.6563	0.000129003	0.0299223	rDPI_23910	chr18	36828775	36828793	chr18:36828775..36828793,chr18:36828707..36828859,-;peak:chr18:36828780..36828781,-;peakCounts:1078.8	4523	-	36828780	ENST00000589049.5	ENSG00000134779.15	alternative	TPGS2
-0.509955	1.48825	14.65	0.000129433	0.0299223	rDPI_13103	chr12	110582339	110582354	chr12:110582339..110582354,chr12:110582024..110582414,+;peak:chr12:110582344..110582345,+;peakCounts:310.3	881	+	110582344	ENST00000550703.6	ENSG00000204852.17	alternative	TCTN1
-0.628407	1.18825	14.6464	0.000129683	0.0299223	rDPI_27803	chr2	20637488	20637494	chr2:20637488..20637494,chr2:20637325..20637547,+;peak:chr2:20637493..20637494,+;peakCounts:138.5	306	+	20637493	ENST00000272224.5	ENSG00000143869.7	alternative	GDF7
-0.661304	0.915044	14.628	0.000130955	0.0301095	rDPI_34096	chr21	8398349	8398353	chr21:8398349..8398353,chr21:8398254..8398363,+;peak:chr21:8398352..8398353,+;peakCounts:25.5	98	+	8398352	ENST00000613359.1	ENSG00000275215.1	alternative	RNA5-8SN3
-0.763719	2.38848	14.6123	0.00013205	0.0302548	rDPI_41270	chr5	784715	784732	chr5:784715..784732,chr5:784676..784783,-;peak:chr5:784722..784723,-;peakCounts:456.3	2076	-	784722	ENST00000508859.8	ENSG00000206077.14	promoter	ZDHHC11B
0.592977	1.35349	14.5741	0.000134753	0.030656	rDPI_4766	chr1	218304919	218304936	chr1:218304919..218304936,chr1:218304885..218304962,+;peak:chr1:218304930..218304931,+;peakCounts:189.9	454	+	218304930	ENST00000491428.1	ENSG00000067533.6	alternative	RRP15
-0.397242	4.58429	14.5693	0.000135098	0.030656	rDPI_54096	chrX	53225203	53225211	chrX:53225203..53225211,chrX:53225125..53225237,-;peak:chrX:53225207..53225208,-;peakCounts:10760.4	14865	-	53225207	ENST00000375401.8	ENSG00000126012.12	promoter	KDM5C
-0.606276	4.49345	14.5644	0.000135448	0.030656	rDPI_52420	chr9	113594125	113594134	chr9:113594125..113594134,chr9:113594073..113594239,+;peak:chr9:113594129..113594130,+;peakCounts:9254.7	12753	+	113594129	ENST00000620489.1	ENSG00000138835.22	promoter	RGS3
0.918665	2.18732	14.5612	0.000135679	0.030656	rDPI_19835	chr16	56657935	56657950	chr16:56657935..56657950,chr16:56657883..56658042,+;peak:chr16:56657942..56657943,+;peakCounts:703.8	2554	+	56657942	ENST00000334350.7	ENSG00000198417.7	promoter	MT1F
-0.557741	3.33507	14.5544	0.000136169	0.0306605	rDPI_51786	chr9	70414311	70414320	chr9:70414311..70414320,chr9:70414288..70414407,-;peak:chr9:70414313..70414314,-;peakCounts:2211.3	4024	-	70414313	ENST00000377126.3	ENSG00000119138.4	promoter	KLF9
0.506278	1.06502	14.5383	0.000137336	0.0308073	rDPI_29625	chr2	134718288	134718291	chr2:134718288..134718291,chr2:134718226..134718332,+;peak:chr2:134718288..134718289,+;peakCounts:238.5	289	+	134718288	ENST00000655237.1	ENSG00000287463.1	enhancer	NA
0.494195	1.07652	14.5262	0.000138227	0.0308073	rDPI_54080	chrX	51332818	51332830	chrX:51332818..51332830,+	210	+	51332822	ENST00000356450.3	ENSG00000122824.11	promoter	NUDT10
-0.77036	5.44237	14.52	0.000138683	0.0308073	rDPI_3039	chr1	150579597	150579602	chr1:150579597..150579602,chr1:150579242..150579676,-;peak:chr1:150579597..150579598,-;peakCounts:9410.5	31300	-	150579597	ENST00000678610.1	ENSG00000143384.14	promoter	MCL1
-0.863365	1.49921	14.5196	0.000138708	0.0308073	rDPI_7068	chr10	97771927	97771930	chr10:97771927..97771930,chr10:97771730..97772309,-;peak:chr10:97771927..97771928,-;peakCounts:11.6	664	-	97771927	ENST00000266066.4	ENSG00000120057.5	alternative	SFRP5
1.05642	3.44771	14.5049	0.000139794	0.030921	rDPI_12767	chr12	102480555	102480567	chr12:102480555..102480567,chr12:102480402..102480664,-;peak:chr12:102480563..102480564,-;peakCounts:1718.1	4994	-	102480563	ENST00000337514.11	ENSG00000017427.17	promoter	IGF1
-0.652251	3.26388	14.4999	0.000140167	0.030921	rDPI_41279	chr5	997336	997346	chr5:997336..997346,chr5:997289..997381,-;peak:chr5:997339..997340,-;peakCounts:1911	4863	-	997339	ENST00000399869.1	ENSG00000215246.5	alternative	LOC100506688
0.663841	0.915914	14.4751	0.000142024	0.0312253	rDPI_6053	chr10	46375763	46375781	chr10:46375763..46375781,+	162	+	46375776	ENST00000620353.1	ENSG00000264230.9	promoter	ANXA8L1
0.678587	1.54183	14.4632	0.000142926	0.031318	rDPI_12763	chr12	102478547	102478559	chr12:102478547..102478559,-	637	-	102478553	ENST00000424202.6	ENSG00000017427.17	promoter	IGF1
0.552243	1.74513	14.4445	0.000144349	0.0315241	rDPI_7330	chr10	104339749	104339774	chr10:104339749..104339774,chr10:104339705..104339848,+;peak:chr10:104339765..104339766,+;peakCounts:287.1	1167	+	104339765	ENST00000369704.8	ENSG00000120051.15	enhancer	CFAP58
0.438529	1.39437	14.4297	0.000145487	0.0316668	rDPI_52947	chr9	131289469	131289479	chr9:131289469..131289479,chr9:131289397..131289507,+;peak:chr9:131289474..131289475,+;peakCounts:378.9	620	+	131289474	ENST00000645295.1	ENSG00000160539.6	alternative	PLPP7
-0.867036	1.38355	14.4169	0.000146479	0.0317767	rDPI_44132	chr6	14117767	14117775	chr6:14117767..14117775,chr6:14117599..14117782,+;peak:chr6:14117772..14117773,+;peakCounts:478.8	934	+	14117772	ENST00000379153.4	ENSG00000112149.10	promoter	CD83
0.496842	1.86548	14.3971	0.000148031	0.0320071	rDPI_35971	chr3	12663467	12663474	chr3:12663467..12663474,chr3:12663465..12663527,-;peak:chr3:12663467..12663468,-;peakCounts:369	873	-	12663467	ENST00000442415.7	ENSG00000132155.13	enhancer	RAF1
-0.614094	2.39696	14.3799	0.000149388	0.0321437	rDPI_51787	chr9	70414324	70414335	chr9:70414324..70414335,chr9:70414288..70414407,-;peak:chr9:70414329..70414330,-;peakCounts:767.3	1694	-	70414329	ENST00000377126.3	ENSG00000119138.4	alternative	KLF9
-0.490225	1.84029	14.3766	0.000149648	0.0321437	rDPI_53897	chrX	44873600	44873613	chrX:44873600..44873613,+	1523	+	44873600	ENST00000621147.4	ENSG00000147050.16	alternative	KDM6A
0.975714	6.70585	14.3556	0.00015133	0.0323769	rDPI_11930	chr12	54588608	54588627	chr12:54588608..54588627,chr12:54588409..54588726,-;peak:chr12:54588613..54588614,-;peakCounts:19109.7	52455	-	54588613	ENST00000257905.13	ENSG00000135447.17	promoter	PPP1R1A
-0.494789	1.36748	14.3507	0.000151725	0.0323769	rDPI_32812	chr20	3712632	3712639	chr20:3712632..3712639,chr20:3712521..3712642,-;peak:chr20:3712635..3712636,-;peakCounts:192.3	507	-	3712635	ENST00000344754.6	ENSG00000088827.13	alternative	SIGLEC1
-0.610145	3.40826	14.2789	0.000157625	0.0335264	rDPI_35656	chr22	45309922	45309965	chr22:45309922..45309965,chr22:45309787..45310016,+;peak:chr22:45309955..45309956,+;peakCounts:597.6	6923	+	45309955	ENST00000441876.7	ENSG00000100376.12	promoter	FAM118A
0.595667	1.02801	14.2648	0.000158809	0.0336684	rDPI_42912	chr5	138753273	138753286	chr5:138753273..138753286,chr5:138753231..138753347,-;peak:chr5:138753282..138753283,-;peakCounts:67.3	182	-	138753282	ENST00000520838.1	ENSG00000253404.1	promoter	LOC105379194
0.593372	2.13729	14.2038	0.000164036	0.0345125	rDPI_25635	chr19	18543055	18543072	chr19:18543055..18543072,chr19:18543027..18543094,-;peak:chr19:18543066..18543067,-;peakCounts:498.6	1824	-	18543066	ENST00000596558.6	ENSG00000105701.16	promoter	FKBP8
-1.006	4.65938	14.2035	0.000164062	0.0345125	rDPI_25422	chr19	14518394	14518403	chr19:14518394..14518403,chr19:14518189..14518534,-;peak:chr19:14518397..14518398,-;peakCounts:8683.2	19121	-	14518397	ENST00000254322.3	ENSG00000132002.9	promoter	DNAJB1
-1.46369	2.88255	14.1999	0.000164376	0.0345125	rDPI_439	chr1	11858269	11858281	chr1:11858269..11858281,chr1:11858217..11858495,-;peak:chr1:11858274..11858275,-;peakCounts:1071	2813	-	11858274	ENST00000376468.4	ENSG00000120937.9	alternative	NPPB
0.650267	1.19456	14.1939	0.000164906	0.034513	rDPI_48427	chr7	113494784	113494799	chr7:113494784..113494799,chr7:113494724..113494826,-;peak:chr7:113494793..113494794,-;peakCounts:100.8	217	-	113494793	ENST00000670885.1	ENSG00000287592.1	promoter	NA
-0.679375	1.031	14.1823	0.000165926	0.0346155	rDPI_28831	chr2	71685069	71685075	chr2:71685069..71685075,chr2:71685018..71685081,+;peak:chr2:71685074..71685075,+;peakCounts:210.6	250	+	71685074	ENST00000468173.1	ENSG00000135636.14	enhancer	DYSF
0.574127	2.02695	14.1649	0.000167464	0.0346871	rDPI_54547	chrX	106177322	106177327	chrX:106177322..106177327,+	2278	+	106177323	ENST00000357175.6	ENSG00000157502.13	enhancer	PWWP3B
-0.746741	2.19497	14.1627	0.000167663	0.0346871	rDPI_42038	chr5	78510356	78510401	chr5:78510356..78510401,chr5:78510313..78510424,-;peak:chr5:78510361..78510362,-;peakCounts:194.4	1583	-	78510361	ENST00000502722.1	ENSG00000145685.14	enhancer	LHFPL2
0.499023	1.70046	14.1604	0.000167863	0.0346871	rDPI_47063	chr7	26864614	26864621	chr7:26864614..26864621,chr7:26864488..26864708,-;peak:chr7:26864620..26864621,-;peakCounts:378.7	835	-	26864620	ENST00000345317.7	ENSG00000005020.13	alternative	SKAP2
-0.9621	1.27471	14.1521	0.000168611	0.0347316	rDPI_34822	chr22	22395009	22395022	chr22:22395009..22395022,+	473	+	22395018	ENST00000390298.2	ENSG00000211652.2	promoter	IGLV7-43
0.999619	1.53696	14.1458	0.000169178	0.034739	rDPI_28528	chr2	62827255	62827257	chr2:62827255..62827257,chr2:62827228..62827293,+;peak:chr2:62827255..62827256,+;peakCounts:710.1	831	+	62827255	ENST00000462441.1	ENSG00000115504.15	enhancer	EHBP1
-1.12686	3.05224	14.0957	0.000173745	0.0354763	rDPI_8396	chr11	19182695	19182718	chr11:19182695..19182718,chr11:19182382..19182752,-;peak:chr11:19182700..19182701,-;peakCounts:557.1	2388	-	19182700	ENST00000647990.1	ENSG00000129170.10	alternative	CSRP3
-0.903417	2.18843	14.0945	0.000173856	0.0354763	rDPI_8395	chr11	19182658	19182675	chr11:19182658..19182675,chr11:19182382..19182752,-;peak:chr11:19182665..19182666,-;peakCounts:168.1	981	-	19182665	ENST00000647990.1	ENSG00000129170.10	alternative	CSRP3
0.642867	2.8285	14.0695	0.000176176	0.0358378	rDPI_13852	chr13	29428690	29428701	chr13:29428690..29428701,chr13:29428584..29428898,+;peak:chr13:29428695..29428696,+;peakCounts:2363	3732	+	29428695	ENST00000542829.1	ENSG00000132938.22	alternative	MTUS2
-0.801038	2.19461	14.0593	0.000177138	0.0358889	rDPI_40861	chr4	158171446	158171463	chr4:158171446..158171463,chr4:158171313..158171628,-;peak:chr4:158171457..158171458,-;peakCounts:372.2	1936	-	158171457	ENST00000593260.1	ENSG00000164125.16	alternative	GASK1B
-0.584149	2.32245	14.0552	0.000177526	0.0358889	rDPI_10383	chr11	117232522	117232573	chr11:117232522..117232573,chr11:117232474..117232647,-;peak:chr11:117232544..117232545,-;peakCounts:193.5	1655	-	117232544	ENST00000530269.1	ENSG00000160613.14	alternative	PCSK7
-0.627724	2.28442	14.0481	0.000178194	0.0359127	rDPI_49538	chr8	22109411	22109428	chr8:22109411..22109428,chr8:22109366..22109462,-;peak:chr8:22109419..22109420,-;peakCounts:513.9	1543	-	22109419	ENST00000613958.1	ENSG00000275074.2	promoter	NUDT18
-0.897518	1.78434	14.0331	0.000179621	0.036089	rDPI_43469	chr5	160258462	160258508	chr5:160258462..160258508,+	836	+	160258506	ENST00000522428.1	ENSG00000254373.1	enhancer	NA
-1.39747	2.0776	14.0264	0.000180267	0.0361075	rDPI_16791	chr14	106593197	106593202	chr14:106593197..106593202,-	1495	-	106593199	ENST00000390627.3	ENSG00000211967.3	enhancer	IGHV3-53
-1.11659	1.17521	14.0118	0.000181663	0.0362136	rDPI_21057	chr17	7844299	7844305	chr17:7844299..7844305,chr17:7844138..7844360,+;peak:chr17:7844304..7844305,+;peakCounts:98.3	839	+	7844304	ENST00000575521.1	ENSG00000132510.11	alternative	KDM6B
0.568901	1.45725	14.0093	0.000181905	0.0362136	rDPI_9288	chr11	64744137	64744148	chr11:64744137..64744148,chr11:64744024..64744189,-;peak:chr11:64744142..64744143,-;peakCounts:377.1	684	-	64744142	ENST00000394432.8	ENSG00000068831.19	alternative	RASGRP2
0.995816	5.67574	13.9908	0.00018371	0.0364616	rDPI_1194	chr1	32336232	32336234	chr1:32336232..32336234,chr1:32336200..32336271,-;peak:chr1:32336233..32336234,-;peakCounts:25909.2	34089	-	32336233	ENST00000329421.8	ENSG00000175130.7	promoter	MARCKSL1
-0.826841	1.48152	13.9677	0.00018598	0.0368004	rDPI_37635	chr3	115623577	115623596	chr3:115623577..115623596,chr3:115623491..115623683,+;peak:chr3:115623582..115623583,+;peakCounts:140.2	640	+	115623582	ENST00000393780.3	ENSG00000172020.13	alternative	GAP43
0.449396	1.58276	13.9138	0.000191393	0.0377512	rDPI_24852	chr19	6719323	6719369	chr19:6719323..6719369,-	442	-	6719341	ENST00000594936.1	ENSG00000125730.17	promoter	C3
-1.38874	2.67347	13.9084	0.000191942	0.0377512	rDPI_48613	chr7	128455869	128455884	chr7:128455869..128455884,chr7:128455806..128455948,+;peak:chr7:128455878..128455879,+;peakCounts:2322.9	3846	+	128455878	ENST00000257696.5	ENSG00000135245.10	promoter	HILPDA
0.410578	6.98877	13.8999	0.000192811	0.0378084	rDPI_10933	chr12	6493248	6493268	chr12:6493248..6493268,chr12:6493064..6493374,-;peak:chr12:6493248..6493249,-;peakCounts:15003	61316	-	6493248	ENST00000229238.5	ENSG00000111639.8	promoter	MRPL51
0.373644	3.77463	13.8641	0.000196515	0.0384193	rDPI_26238	chr19	39391085	39391098	chr19:39391085..39391098,chr19:39390953..39391158,-;peak:chr19:39391092..39391093,-;peakCounts:3863.7	6470	-	39391092	ENST00000595797.5	ENSG00000006712.15	promoter	PAF1
-0.887082	3.17513	13.8218	0.000200986	0.0391762	rDPI_20157	chr16	69726559	69726561	chr16:69726559..69726561,chr16:69726514..69726662,-;peak:chr16:69726560..69726561,-;peakCounts:3632.4	4091	-	69726560	ENST00000320623.10	ENSG00000181019.13	promoter	NQO1
-0.434386	2.04652	13.8044	0.000202863	0.0394242	rDPI_22029	chr17	43211873	43211880	chr17:43211873..43211880,chr17:43211826..43211905,+;peak:chr17:43211875..43211876,+;peakCounts:472.5	1067	+	43211875	ENST00000592649.5	ENSG00000184988.8	promoter	TMEM106A
0.634297	1.47686	13.798	0.000203554	0.0394411	rDPI_52937	chr9	131234195	131234196	chr9:131234195..131234196,chr9:131234144..131234273,-;peak:chr9:131234195..131234196,-;peakCounts:412.5	480	-	131234195	ENST00000247295.4	ENSG00000126882.13	enhancer	FAM78A
-1.21334	2.42886	13.7528	0.000208505	0.040281	rDPI_17692	chr15	63064110	63064136	chr15:63064110..63064136,chr15:63064043..63064145,+;peak:chr15:63064121..63064122,+;peakCounts:292.5	1572	+	63064121	ENST00000560131.1	ENSG00000140416.23	not_classified	TPM1
-1.46644	8.82848	13.7273	0.000211357	0.0406588	rDPI_44534	chr6	31357136	31357251	chr6:31357136..31357251,chr6:31357136..31357251,-	187664	-	31357179	ENST00000412585.7	ENSG00000234745.13	promoter	HLA-B
-0.382252	1.67877	13.7242	0.000211706	0.0406588	rDPI_22804	chr17	68205480	68205487	chr17:68205480..68205487,chr17:68205418..68205574,+;peak:chr17:68205486..68205487,+;peakCounts:384.4	1068	+	68205486	ENST00000674770.2	ENSG00000196704.14	promoter	AMZ2
-0.681182	1.06388	13.6997	0.000214489	0.0410724	rDPI_14810	chr14	23383229	23383234	chr14:23383229..23383234,chr14:23383223..23383330,-;peak:chr14:23383229..23383230,-;peakCounts:77.8	338	-	23383229	ENST00000651452.1	ENSG00000197616.13	alternative	MYH6
-0.468265	1.37805	13.6743	0.000217409	0.0415098	rDPI_53569	chrX	6227072	6227084	chrX:6227072..6227084,chrX:6227005..6227135,-;peak:chrX:6227075..6227076,-;peakCounts:246.6	566	-	6227075	ENST00000381093.6	ENSG00000146938.16	promoter	NLGN4X
-1.10749	1.87724	13.6609	0.00021897	0.041686	rDPI_38115	chr3	138010350	138010363	chr3:138010350..138010363,chr3:138010097..138010401,+;peak:chr3:138010359..138010360,+;peakCounts:533.7	944	+	138010359	ENST00000479660.1	ENSG00000066405.13	enhancer	CLDN18
-0.693261	5.63656	13.6337	0.000222166	0.0421302	rDPI_9038	chr11	61967450	61967459	chr11:61967450..61967459,chr11:61967430..61967698,-;peak:chr11:61967453..61967454,-;peakCounts:5098.2	20584	-	61967453	ENST00000534719.1	ENSG00000167996.16	alternative	FTH1
-0.487832	2.35305	13.6301	0.000222593	0.0421302	rDPI_18862	chr16	2883283	2883294	chr16:2883283..2883294,chr16:2883152..2883353,+;peak:chr16:2883288..2883289,+;peakCounts:896.9	2301	+	2883288	ENST00000572006.1	ENSG00000162076.13	alternative	FLYWCH2
-1.43206	4.00646	13.6246	0.000223241	0.0421306	rDPI_16950	chr15	34790437	34790453	chr15:34790437..34790453,chr15:34790278..34790589,-;peak:chr15:34790442..34790443,-;peakCounts:507.6	4657	-	34790442	ENST00000560563.1	ENSG00000159251.8	alternative	ACTC1
-0.622078	0.955277	13.5586	0.000231232	0.0435129	rDPI_24847	chr19	6531026	6531027	chr19:6531026..6531027,+	408	+	6531026	ENST00000245817.5	ENSG00000125657.5	promoter	TNFSF9
0.654083	1.96902	13.5452	0.00023288	0.0436972	rDPI_17319	chr15	44667189	44667200	chr15:44667189..44667200,chr15:44667189..44667300,-;peak:chr15:44667189..44667190,-;peakCounts:763.2	1073	-	44667189	ENST00000561082.1	ENSG00000229474.7	promoter	PATL2
0.828757	2.56723	13.538	0.000233781	0.0437404	rDPI_49057	chr7	149874033	149874039	chr7:149874033..149874039,chr7:149873911..149874067,+;peak:chr7:149874038..149874039,+;peakCounts:1529.9	3024	+	149874038	ENST00000425642.2	ENSG00000171130.18	alternative	ATP6V0E2
0.940331	2.06486	13.4438	0.000245817	0.0458611	rDPI_3133	chr1	151728355	151728369	chr1:151728355..151728369,chr1:151728245..151728391,+;peak:chr1:151728363..151728364,+;peakCounts:1238.2	2347	+	151728363	ENST00000451222.5	ENSG00000178796.13	alternative	RIIAD1
-0.641465	2.07799	13.3922	0.000252667	0.0470047	rDPI_8924	chr11	59212974	59212980	chr11:59212974..59212980,chr11:59212816..59212985,-;peak:chr11:59212979..59212980,-;peakCounts:1012.2	1360	-	59212979	ENST00000361050.4	ENSG00000197629.6	alternative	MPEG1
-1.06847	7.03851	13.3852	0.000253613	0.0470467	rDPI_1030	chr1	27672149	27672258	chr1:27672149..27672258,chr1:27672149..27672258,-	81927	-	27672192	ENST00000339145.8	ENSG00000126709.16	promoter	IFI6
-0.379675	4.28697	13.372	0.000255412	0.0471019	rDPI_380	chr1	11262535	11262545	chr1:11262535..11262545,chr1:11262498..11262576,-;peak:chr1:11262540..11262541,-;peakCounts:5498.1	12429	-	11262540	ENST00000361445.9	ENSG00000198793.13	promoter	MTOR
-0.530318	1.25094	13.3651	0.000256346	0.0471019	rDPI_46613	chr6	170044512	170044521	chr6:170044512..170044521,chr6:170044426..170044551,+;peak:chr6:170044516..170044517,+;peakCounts:274.4	457	+	170044516	ENST00000654612.1	ENSG00000287823.1	alternative	NA
0.435914	6.15096	13.363	0.000256644	0.0471019	rDPI_3803	chr1	167936683	167936686	chr1:167936683..167936686,chr1:167936547..167937002,+;peak:chr1:167936683..167936684,+;peakCounts:63657.1	87532	+	167936683	ENST00000470721.5	ENSG00000143164.15	alternative	DCAF6
-0.723401	2.69611	13.3585	0.000257252	0.0471019	rDPI_9835	chr11	73982842	73982844	chr11:73982842..73982844,chr11:73982766..73982898,-;peak:chr11:73982843..73982844,-;peakCounts:1842.3	2101	-	73982843	ENST00000663595.2	ENSG00000175567.11	promoter	UCP2
-0.653267	1.42089	13.3566	0.000257518	0.0471019	rDPI_6110	chr10	50061682	50061693	chr10:50061682..50061693,chr10:50061643..50061737,-;peak:chr10:50061687..50061688,-;peakCounts:248	393	-	50061687	ENST00000649244.1	ENSG00000235618.8	alternative	FAM21EP
-1.30843	1.5761	13.318	0.000262875	0.0479475	rDPI_16779	chr14	106211465	106211472	chr14:106211465..106211472,-	1115	-	106211471	ENST00000390606.3	ENSG00000211946.3	promoter	IGHV3-20
0.758891	3.03353	13.2991	0.000265541	0.048257	rDPI_13114	chr12	110689110	110689119	chr12:110689110..110689119,chr12:110689089..110689165,-;peak:chr12:110689114..110689115,-;peakCounts:2257.2	3406	-	110689114	ENST00000242607.13	ENSG00000122986.14	promoter	HVCN1
0.389869	1.92921	13.2955	0.00026605	0.048257	rDPI_26236	chr19	39390887	39390894	chr19:39390887..39390894,chr19:39390866..39390922,-;peak:chr19:39390890..39390891,-;peakCounts:983.7	1218	-	39390890	ENST00000595797.5	ENSG00000006712.15	alternative	PAF1
0.870273	2.79783	13.2595	0.000271197	0.0490117	rDPI_3907	chr1	172452893	172452896	chr1:172452893..172452896,chr1:172452726..172452991,+;peak:chr1:172452893..172452894,+;peakCounts:1985.8	2771	+	172452893	ENST00000367725.4	ENSG00000180999.11	alternative	C1orf105
0.549776	2.57908	13.2542	0.000271967	0.0490117	rDPI_45453	chr6	75493759	75493768	chr6:75493759..75493768,chr6:75493417..75493915,-;peak:chr6:75493763..75493764,-;peakCounts:47.6999999999998	2384	-	75493763	ENST00000237172.12	ENSG00000118407.15	alternative	FILIP1
0.592106	2.48383	13.2508	0.000272462	0.0490117	rDPI_53917	chrX	46573792	46573801	chrX:46573792..46573801,chrX:46573636..46573978,+;peak:chrX:46573796..46573797,+;peakCounts:1232.1	2474	+	46573796	ENST00000276055.4	ENSG00000147119.4	alternative	CHST7
0.621054	2.13126	13.2233	0.000276493	0.0496001	rDPI_4764	chr1	218304824	218304836	chr1:218304824..218304836,chr1:218304790..218304864,+;peak:chr1:218304829..218304830,+;peakCounts:605.7	1579	+	218304829	ENST00000491428.1	ENSG00000067533.6	enhancer	RRP15
-0.391724	1.86316	13.1652	0.000285201	0.0509694	rDPI_21120	chr17	8630900	8630907	chr17:8630900..8630907,chr17:8630845..8630972,-;peak:chr17:8630904..8630905,-;peakCounts:607.5	1359	-	8630904	ENST00000379980.8	ENSG00000133026.13	alternative	MYH10
-0.443406	1.40704	13.1591	0.000286129	0.0509694	rDPI_7155	chr10	101032457	101032459	chr10:101032457..101032459,chr10:101032386..101032468,+;peak:chr10:101032458..101032459,+;peakCounts:428.1	663	+	101032458	ENST00000224807.9	ENSG00000107819.13	alternative	SFXN3
-0.498418	1.55925	13.1423	0.000288704	0.0509694	rDPI_20617	chr17	1628819	1628825	chr17:1628819..1628825,chr17:1628791..1628900,-;peak:chr17:1628819..1628820,-;peakCounts:790.2	975	-	1628819	ENST00000301335.10	ENSG00000167703.15	promoter	SLC43A2
-0.845148	1.202	13.1412	0.000288875	0.0509694	rDPI_26421	chr19	41506373	41506414	chr19:41506373..41506414,+	554	+	41506409	ENST00000600996.1	ENSG00000268034.1	promoter	NA
-0.672717	3.71073	13.1371	0.000289499	0.0509694	rDPI_45254	chr6	47309901	47309911	chr6:47309901..47309911,chr6:47309838..47309977,-;peak:chr6:47309905..47309906,-;peakCounts:5164.2	7855	-	47309905	ENST00000296861.2	ENSG00000146072.6	promoter	TNFRSF21
-0.785821	4.54333	13.1341	0.000289966	0.0509694	rDPI_26846	chr19	48325368	48325379	chr19:48325368..48325379,chr19:48325268..48325611,+;peak:chr19:48325373..48325374,+;peakCounts:11647.6	15039	+	48325373	ENST00000596315.5	ENSG00000142227.11	alternative	EMP3
-0.449457	4.96229	13.1338	0.000290011	0.0509694	rDPI_53724	chrX	20141830	20141844	chrX:20141830..20141844,chrX:20141800..20141908,-;peak:chrX:20141835..20141836,-;peakCounts:8760.6	19489	-	20141835	ENST00000379607.10	ENSG00000173674.11	promoter	EIF1AX
-0.410992	1.61194	13.1268	0.000291102	0.0509694	rDPI_47270	chr7	39950313	39950338	chr7:39950313..39950338,chr7:39950172..39950396,+;peak:chr7:39950319..39950320,+;peakCounts:260.7	999	+	39950319	ENST00000613626.4	ENSG00000065883.16	alternative	CDK13
0.476733	1.09846	13.1265	0.000291151	0.0509694	rDPI_48756	chr7	131209072	131209081	chr7:131209072..131209081,chr7:131209005..131209085,+;peak:chr7:131209077..131209078,+;peakCounts:90.6	371	+	131209077	ENST00000427253.1	ENSG00000233287.1	alternative	RPL27P11
0.532552	1.02492	13.1028	0.000294857	0.0513448	rDPI_16769	chr14	106012391	106012396	chr14:106012391..106012396,-	127	-	106012391	ENST00000455737.2	ENSG00000276775.1	promoter	IGHV4-4
-1.2871	1.74823	13.0996	0.00029536	0.0513448	rDPI_35019	chr22	30246756	30246822	chr22:30246756..30246822,chr22:30246756..30246822,-	2293	-	30246759	ENST00000249075.4	ENSG00000128342.5	promoter	LIF
0.339406	5.80163	13.0977	0.000295655	0.0513448	rDPI_371	chr1	11012657	11012663	chr1:11012657..11012663,chr1:11012610..11012692,+;peak:chr1:11012659..11012660,+;peakCounts:23738.4	41318	+	11012659	ENST00000614757.4	ENSG00000120948.19	promoter	TARDBP
-1.01823	1.92296	13.0836	0.000297896	0.0515946	rDPI_2135	chr1	78620468	78620471	chr1:78620468..78620471,chr1:78620369..78620510,+;peak:chr1:78620470..78620471,+;peakCounts:531.4	1238	+	78620470	ENST00000680110.1	ENSG00000137959.17	alternative	IFI44L
-1.41195	2.7333	13.075	0.000299257	0.0515946	rDPI_440	chr1	11858355	11858366	chr1:11858355..11858366,chr1:11858217..11858495,-;peak:chr1:11858360..11858361,-;peakCounts:1327	2356	-	11858360	ENST00000376468.4	ENSG00000120937.9	alternative	NPPB
-0.410327	1.76265	13.0737	0.000299463	0.0515946	rDPI_11774	chr12	51009234	51009245	chr12:51009234..51009245,chr12:51009168..51009291,-;peak:chr12:51009237..51009238,-;peakCounts:265.1	775	-	51009237	ENST00000545993.7	ENSG00000110911.17	promoter	SLC11A2
0.470781	1.03431	13.0582	0.000301966	0.0518889	rDPI_54029	chrX	48971851	48971859	chrX:48971851..48971859,chrX:48971792..48971876,-;peak:chrX:48971855..48971856,-;peakCounts:96.8	202	-	48971855	ENST00000218176.4	ENSG00000102057.10	alternative	KCND1
0.519534	4.98682	13.0488	0.000303476	0.0520114	rDPI_27661	chr2	9423456	9423476	chr2:9423456..9423476,chr2:9423334..9423634,-;peak:chr2:9423456..9423457,-;peakCounts:5541.3	15203	-	9423456	ENST00000483795.5	ENSG00000119185.13	promoter	ITGB1BP1
1.13351	2.57055	13.0272	0.000307	0.0524778	rDPI_29036	chr2	86563440	86563446	chr2:86563440..86563446,chr2:86563310..86563523,-;peak:chr2:86563443..86563444,-;peakCounts:983	3109	-	86563443	ENST00000263856.9	ENSG00000115561.16	alternative	CHMP3
-0.563669	1.66558	13.0147	0.000309058	0.0526916	rDPI_45104	chr6	43060541	43060551	chr6:43060541..43060551,chr6:43060453..43060561,+;peak:chr6:43060549..43060550,+;peakCounts:402.3	793	+	43060549	ENST00000481888.1	ENSG00000137171.15	enhancer	KLC4
0.51609	1.21534	12.9963	0.000312114	0.0530741	rDPI_33092	chr20	25216579	25216596	chr20:25216579..25216596,chr20:25216404..25216703,+;peak:chr20:25216592..25216593,+;peakCounts:105.6	375	+	25216592	ENST00000471478.1	ENSG00000197586.13	alternative	ENTPD6
-1.72522	1.82015	12.9495	0.000320002	0.054274	rDPI_29058	chr2	87825221	87825226	chr2:87825221..87825226,+	996	+	87825222	ENST00000435212.2	ENSG00000229604.2	enhancer	MTATP8P2
0.975949	1.8687	12.9008	0.00032844	0.0554686	rDPI_48235	chr7	101237742	101237858	chr7:101237742..101237858,chr7:101237742..101237858,-	1182	-	101237802	ENST00000308344.10	ENSG00000106404.14	promoter	CLDN15
-0.55074	2.77701	12.8991	0.000328744	0.0554686	rDPI_18870	chr16	2969348	2969349	chr16:2969348..2969349,chr16:2969242..2969393,+;peak:chr16:2969348..2969349,+;peakCounts:3572.1	3969	+	2969348	ENST00000318782.9	ENSG00000162073.14	promoter	PAQR4
0.41341	2.67813	12.8872	0.000330831	0.0556768	rDPI_7257	chr10	102714338	102714341	chr10:102714338..102714341,chr10:102714269..102714463,-;peak:chr10:102714338..102714339,-;peakCounts:148.1	2320	-	102714338	ENST00000260746.6	ENSG00000138175.9	alternative	ARL3
0.469678	1.33044	12.8682	0.00033422	0.0558886	rDPI_29159	chr2	96816114	96816125	chr2:96816114..96816125,chr2:96816014..96816163,-;peak:chr2:96816119..96816120,-;peakCounts:216.8	575	-	96816119	ENST00000608609.1	ENSG00000273265.1	alternative	CNNM3-DT
-1.83767	2.82193	12.8626	0.000335218	0.0558886	rDPI_46980	chr7	22727195	22727201	chr7:22727195..22727201,chr7:22727140..22727285,+;peak:chr7:22727200..22727201,+;peakCounts:6683.4	8602	+	22727200	ENST00000485300.1	ENSG00000136244.12	promoter	IL6
1.05634	1.96545	12.8613	0.00033545	0.0558886	rDPI_51510	chr9	34691275	34691277	chr9:34691275..34691277,chr9:34691217..34691278,-;peak:chr9:34691276..34691277,-;peakCounts:1156.5	1301	-	34691276	ENST00000311925.7	ENSG00000172724.12	promoter	CCL19
0.567364	1.47874	12.8572	0.000336191	0.0558886	rDPI_43159	chr5	148453027	148453038	chr5:148453027..148453038,chr5:148452697..148453154,+;peak:chr5:148453032..148453033,+;peakCounts:196.6	645	+	148453032	ENST00000508176.1	ENSG00000145868.17	alternative	FBXO38
0.417717	6.17807	12.8562	0.000336369	0.0558886	rDPI_17494	chr15	55196932	55196946	chr15:55196932..55196946,chr15:55196830..55196975,-;peak:chr15:55196936..55196937,-;peakCounts:11151.9	35074	-	55196936	ENST00000260443.9	ENSG00000137876.11	promoter	RSL24D1
-0.666951	0.935434	12.8414	0.000339031	0.056188	rDPI_48305	chr7	105013403	105013408	chr7:105013403..105013408,+	202	+	105013403	ENST00000257745.8	ENSG00000005483.21	alternative	KMT2E
-0.554765	1.57749	12.8254	0.000341951	0.0565284	rDPI_28014	chr2	28165300	28165306	chr2:28165300..28165306,chr2:28165258..28165309,+;peak:chr2:28165305..28165306,+;peakCounts:641.7	938	+	28165305	ENST00000423483.1	ENSG00000225991.1	enhancer	RPL23AP34
0.39544	3.30634	12.8079	0.000345157	0.0569143	rDPI_54732	chrX	129523512	129523523	chrX:129523512..129523523,chrX:129523345..129523597,-;peak:chrX:129523516..129523517,-;peakCounts:537.6	3942	-	129523516	ENST00000371122.8	ENSG00000102038.16	alternative	SMARCA1
0.818083	2.05423	12.802	0.000346243	0.0569496	rDPI_37074	chr3	52835192	52835223	chr3:52835192..52835223,chr3:52835167..52835322,-;peak:chr3:52835201..52835202,-;peakCounts:324	1415	-	52835201	ENST00000446157.3	ENSG00000272573.6	alternative	MUSTN1
0.501643	2.30089	12.755	0.000355064	0.0580195	rDPI_28826	chr2	71453732	71453738	chr2:71453732..71453738,chr2:71453462..71453797,+;peak:chr2:71453737..71453738,+;peakCounts:945	1807	+	71453737	ENST00000258104.7	ENSG00000135636.14	alternative	DYSF
-0.728211	0.961681	12.7531	0.000355413	0.0580195	rDPI_34058	chr21	8214301	8214320	chr21:8214301..8214320,+	177	+	8214318	ENST00000612463.1	ENSG00000278233.1	not_classified	RNA5-8SN2
-0.669894	1.24583	12.752	0.000355629	0.0580195	rDPI_26796	chr19	47332175	47332179	chr19:47332175..47332179,+	557	+	47332175	ENST00000595464.3	ENSG00000134830.6	promoter	C5AR2
-0.672402	3.52368	12.7455	0.00035686	0.0580195	rDPI_11123	chr12	9869354	9869360	chr12:9869354..9869360,chr12:9869332..9869462,-;peak:chr12:9869354..9869355,-;peakCounts:6109.2	6906	-	9869354	ENST00000228438.3	ENSG00000110852.5	promoter	CLEC2B
0.428634	1.37152	12.7438	0.000357191	0.0580195	rDPI_54681	chrX	120311413	120311440	chrX:120311413..120311440,-	456	-	120311433	ENST00000309720.9	ENSG00000125355.16	promoter	TMEM255A
-0.951095	3.15789	12.7347	0.00035894	0.058159	rDPI_1121	chr1	31365841	31365856	chr1:31365841..31365856,chr1:31365732..31365947,-;peak:chr1:31365846..31365847,-;peakCounts:763.5	2370	-	31365846	ENST00000497275.5	ENSG00000121769.8	alternative	FABP3
-0.555886	0.873735	12.7025	0.000365173	0.0589365	rDPI_34136	chr21	8437693	8437697	chr21:8437693..8437697,+	84	+	8437695	ENST00000619471.1	ENSG00000278189.1	not_classified	RNA5-8SN1
-1.23891	1.29907	12.6964	0.000366356	0.0589365	rDPI_34259	chr21	28885393	28885433	chr21:28885393..28885433,chr21:28885350..28885512,+;peak:chr21:28885413..28885414,+;peakCounts:129.6	711	+	28885413	ENST00000399975.7	ENSG00000156256.15	promoter	USP16
-1.02466	1.3689	12.696	0.000366446	0.0589365	rDPI_34053	chr21	8144616	8144618	chr21:8144616..8144618,+	822	+	8144617	ENST00000623664.1	ENSG00000278996.1	enhancer	NA
0.657652	1.82501	12.6751	0.000370567	0.0594528	rDPI_11119	chr12	9648638	9648659	chr12:9648638..9648659,chr12:9648601..9648737,+;peak:chr12:9648651..9648652,+;peakCounts:361.8	1112	+	9648651	ENST00000574035.5	ENSG00000256594.8	enhancer	LOC374443
0.523232	2.31656	12.6469	0.000376186	0.0602063	rDPI_38996	chr3	197850991	197850992	chr3:197850991..197850992,-	4817	-	197850991	ENST00000452862.1	ENSG00000234742.1	promoter	RPL17P18
-1.36396	2.32912	12.6258	0.000380463	0.060742	rDPI_9886	chr11	75768774	75768787	chr11:75768774..75768787,chr11:75768724..75768855,+;peak:chr11:75768779..75768780,+;peakCounts:424.4	2202	+	75768779	ENST00000228027.12	ENSG00000062282.15	alternative	DGAT2
0.768179	2.79401	12.6207	0.000381499	0.0607589	rDPI_401	chr1	11796540	11796551	chr1:11796540..11796551,chr1:11796430..11796587,-;peak:chr1:11796550..11796551,-;peakCounts:1155.6	2411	-	11796550	ENST00000641820.1	ENSG00000177000.13	promoter	MTHFR
0.468451	1.47194	12.6034	0.000385056	0.0611761	chr20:30579759-30580339	chr20	30579759	30580339	chr20:30579759-30580339	92	.	30580168	ENST00000636528.1	ENSG00000283443.1	enhancer	NA
-0.503806	1.03565	12.5937	0.00038704	0.0613421	rDPI_38907	chr3	195892781	195892786	chr3:195892781..195892786,-	197	-	195892785	ENST00000428187.7	ENSG00000061938.20	alternative	TNK2
0.868193	1.08222	12.584	0.000389065	0.0615137	rDPI_29270	chr2	101238178	101238179	chr2:101238178..101238179,chr2:101238165..101238235,+;peak:chr2:101238178..101238179,+;peakCounts:307.8	342	+	101238178	ENST00000289382.8	ENSG00000158435.8	enhancer	CNOT11
0.762552	1.60084	12.5735	0.000391249	0.061609	rDPI_33383	chr20	37261809	37261820	chr20:37261809..37261820,chr20:37261749..37261897,-;peak:chr20:37261814..37261815,-;peakCounts:512.1	670	-	37261814	ENST00000373614.7	ENSG00000118702.10	alternative	GHRH
-0.371607	2.21224	12.5721	0.000391555	0.061609	rDPI_23971	chr18	46174094	46174097	chr18:46174094..46174097,chr18:46173972..46174314,+;peak:chr18:46174096..46174097,+;peakCounts:656.3	2516	+	46174096	ENST00000615553.1	ENSG00000152242.11	alternative	C18orf25
-0.451779	2.90717	12.5636	0.000393331	0.0616447	rDPI_39348	chr4	23890075	23890077	chr4:23890075..23890077,chr4:23889891..23890189,-;peak:chr4:23890076..23890077,-;peakCounts:9.39999999999964	3251	-	23890076	ENST00000617484.4	ENSG00000109819.9	alternative	PPARGC1A
0.787562	2.79133	12.562	0.00039367	0.0616447	rDPI_12737	chr12	101680386	101680398	chr12:101680386..101680398,chr12:101680124..101680525,+;peak:chr12:101680390..101680391,+;peakCounts:2323.4	4148	+	101680390	ENST00000549608.1	ENSG00000196091.15	alternative	MYBPC1
-0.549648	2.56671	12.5329	0.00039984	0.0623278	rDPI_49518	chr8	21913690	21913691	chr8:21913690..21913691,-	2453	-	21913690	ENST00000276420.9	ENSG00000147443.13	promoter	DOK2
-0.702847	0.951495	12.5325	0.000399941	0.0623278	rDPI_29095	chr2	89234941	89234942	chr2:89234941..89234942,-	180	-	89234941	ENST00000521304.1	ENSG00000253998.3	promoter	IGKV2-29
0.468356	3.9786	12.4638	0.000414923	0.0645087	rDPI_15305	chr14	24136160	24136168	chr14:24136160..24136168,chr14:24136120..24136300,+;peak:chr14:24136165..24136166,+;peakCounts:5792.6	9616	+	24136165	ENST00000559123.5	ENSG00000092010.15	alternative	PSME1
0.443256	1.13822	12.4559	0.000416675	0.0646272	rDPI_4350	chr1	202203703	202203718	chr1:202203703..202203718,chr1:202203680..202203795,+;peak:chr1:202203712..202203713,+;peakCounts:188.1	328	+	202203712	ENST00000255432.11	ENSG00000133067.18	promoter	LGR6
0.588434	1.34754	12.4383	0.000420626	0.0650854	rDPI_33407	chr20	38085097	38085103	chr20:38085097..38085103,chr20:38085097..38085401,+;peak:chr20:38085097..38085098,+;peakCounts:168.6	585	+	38085097	ENST00000484683.1	ENSG00000101413.12	alternative	RPRD1B
0.41737	1.401	12.4316	0.000422138	0.0651649	rDPI_20980	chr17	7404653	7404654	chr17:7404653..7404654,chr17:7404619..7404746,+;peak:chr17:7404653..7404654,+;peakCounts:525.6	584	+	7404653	ENST00000575301.5	ENSG00000169992.10	alternative	NLGN2
-0.793634	2.47935	12.4165	0.00042556	0.0655382	rDPI_41115	chr4	185145226	185145234	chr4:185145226..185145234,chr4:185144758..185145272,+;peak:chr4:185145233..185145234,+;peakCounts:600.8	1792	+	185145233	ENST00000491736.1	ENSG00000151729.11	alternative	SLC25A4
0.652369	3.31622	12.4033	0.000428565	0.0657179	rDPI_13851	chr13	29428656	29428671	chr13:29428656..29428671,chr13:29428584..29428898,+;peak:chr13:29428665..29428666,+;peakCounts:1327	4530	+	29428665	ENST00000380808.6	ENSG00000132938.22	alternative	MTUS2
0.562291	1.5653	12.4003	0.000429268	0.0657179	rDPI_4848	chr1	223365270	223365274	chr1:223365270..223365274,chr1:223365217..223365300,-;peak:chr1:223365271..223365272,-;peakCounts:560.7	719	-	223365271	ENST00000681305.1	ENSG00000143502.16	enhancer	SUSD4
-1.02844	1.12026	12.3982	0.000429746	0.0657179	rDPI_32364	chr2	227813842	227813844	chr2:227813842..227813844,+	2550	+	227813842	ENST00000358813.5	ENSG00000115009.13	promoter	CCL20
-0.938767	3.26903	12.3927	0.000431013	0.0657577	rDPI_37021	chr3	52451488	52451505	chr3:52451488..52451505,chr3:52451393..52451532,-;peak:chr3:52451496..52451497,-;peakCounts:951.3	2891	-	52451496	ENST00000461086.1	ENSG00000114854.8	alternative	TNNC1
0.733193	0.975307	12.3867	0.000432393	0.0658144	rDPI_47742	chr7	76510403	76510409	chr7:76510403..76510409,chr7:76510369..76510463,+;peak:chr7:76510403..76510404,+;peakCounts:121.5	182	+	76510403	ENST00000257632.9	ENSG00000243566.7	alternative	UPK3B
0.482688	1.41245	12.3677	0.000436828	0.0663184	rDPI_54454	chrX	102651424	102651435	chrX:102651424..102651435,chrX:102651327..102651623,+;peak:chrX:102651431..102651432,+;peakCounts:161.1	812	+	102651431	ENST00000537097.2	ENSG00000198932.13	alternative	GPRASP1
0.444202	5.24954	12.3638	0.000437735	0.0663184	rDPI_47298	chr7	43926432	43926442	chr7:43926432..43926442,chr7:43926405..43926500,+;peak:chr7:43926436..43926437,+;peakCounts:18083.7	23311	+	43926436	ENST00000222402.8	ENSG00000078967.13	promoter	UBE2D4
-0.704588	3.50413	12.3108	0.000450334	0.0679667	rDPI_35033	chr22	30425776	30425794	chr22:30425776..30425794,chr22:30425712..30425877,+;peak:chr22:30425789..30425790,+;peakCounts:1667.7	6744	+	30425789	ENST00000355143.8	ENSG00000242114.6	promoter	MTFP1
-0.386004	1.81624	12.3092	0.000450738	0.0679667	rDPI_54312	chrX	73944325	73944327	chrX:73944325..73944327,chrX:73944311..73944375,+;peak:chrX:73944326..73944327,+;peakCounts:699.3	1386	+	73944326	ENST00000654137.1	ENSG00000225470.8	alternative	JPX
0.388342	2.25122	12.305	0.000451738	0.0679667	rDPI_35446	chr22	40857145	40857151	chr22:40857145..40857151,chr22:40857026..40857158,+;peak:chr22:40857148..40857149,+;peakCounts:307.8	1776	+	40857148	ENST00000357137.9	ENSG00000196236.13	alternative	XPNPEP3
0.362142	5.39844	12.2973	0.000453623	0.0680078	rDPI_35440	chr22	40856624	40856630	chr22:40856624..40856630,chr22:40856562..40856777,-;peak:chr22:40856625..40856626,-;peakCounts:8084.5	27576	-	40856625	ENST00000455824.1	ENSG00000100380.14	alternative	ST13
0.398382	3.81762	12.2953	0.000454093	0.0680078	rDPI_45391	chr6	63636119	63636128	chr6:63636119..63636128,chr6:63636067..63636155,+;peak:chr6:63636124..63636125,+;peakCounts:6263.1	11339	+	63636124	ENST00000509876.5	ENSG00000118482.12	promoter	PHF3
0.579508	3.21588	12.289	0.000455639	0.0680831	rDPI_3328	chr1	154956093	154956102	chr1:154956093..154956102,chr1:154956086..154956181,-;peak:chr1:154956098..154956099,-;peakCounts:4300.2	7882	-	154956098	ENST00000368463.8	ENSG00000163346.17	alternative	PBXIP1
-0.607821	3.23712	12.2835	0.000456974	0.0681267	rDPI_53987	chrX	48521859	48521861	chrX:48521859..48521861,chrX:48521742..48521904,+;peak:chrX:48521859..48521860,+;peakCounts:1331.9	3398	+	48521859	ENST00000446158.5	ENSG00000147155.11	alternative	EBP
0.574136	4.39308	12.2689	0.000460569	0.0685063	rDPI_13806	chr13	27251574	27251594	chr13:27251574..27251594,chr13:27251521..27251627,+;peak:chr13:27251588..27251589,+;peakCounts:3553.2	12797	+	27251588	ENST00000272274.8	ENSG00000122026.10	alternative	RPL21
0.445433	1.71531	12.2459	0.000466275	0.0691974	rDPI_25764	chr19	23274214	23274224	chr19:23274214..23274224,chr19:23274161..23274277,-;peak:chr19:23274219..23274220,-;peakCounts:507.5	830	-	23274219	ENST00000611392.5	ENSG00000283201.1	alternative	ZNF724
0.501787	1.34674	12.222	0.000472294	0.0699316	rDPI_37839	chr3	125958170	125958181	chr3:125958170..125958181,chr3:125958077..125958280,+;peak:chr3:125958175..125958176,+;peakCounts:433.8	737	+	125958175	ENST00000466506.1	ENSG00000241439.1	alternative	NA
-0.676915	1.02712	12.2151	0.000474049	0.0700327	rDPI_34054	chr21	8145488	8145490	chr21:8145488..8145490,+	274	+	8145489	ENST00000623664.1	ENSG00000278996.1	enhancer	NA
0.624188	1.98093	12.2	0.000477901	0.0704424	rDPI_38707	chr3	184319597	184319633	chr3:184319597..184319633,+	1557	+	184319632	ENST00000484862.5	ENSG00000114867.22	promoter	EIF4G1
0.739256	4.69191	12.1532	0.000490047	0.0719858	rDPI_26835	chr19	48110808	48110823	chr19:48110808..48110823,chr19:48110710..48110882,-;peak:chr19:48110817..48110818,-;peakCounts:6360.3	13411	-	48110817	ENST00000599111.5	ENSG00000105499.14	promoter	PLA2G4C
0.484672	1.49197	12.1511	0.000490577	0.0719858	rDPI_41780	chr5	57403588	57403605	chr5:57403588..57403605,chr5:57403550..57403620,+;peak:chr5:57403599..57403600,+;peakCounts:296.1	572	+	57403599	ENST00000506106.1	ENSG00000250961.2	enhancer	NA
0.605426	2.068	12.1413	0.000493171	0.0722042	rDPI_55148	chrX	155147775	155147781	chrX:155147775..155147781,chrX:155147713..155147825,-;peak:chrX:155147775..155147776,-;peakCounts:964.8	1178	-	155147775	ENST00000362018.2	ENSG00000214827.11	promoter	MTCP1
-0.692773	1.42027	12.1197	0.000498932	0.0728842	rDPI_45875	chr6	118559203	118559214	chr6:118559203..118559214,chr6:118558819..118559283,+;peak:chr6:118559208..118559209,+;peakCounts:462.9	811	+	118559208	ENST00000659521.1	ENSG00000286339.1	alternative	NA
-0.497909	3.8732	12.1114	0.000501146	0.0730443	rDPI_53723	chrX	20141818	20141828	chrX:20141818..20141828,chrX:20141800..20141908,-;peak:chrX:20141822..20141823,-;peakCounts:5106.6	8447	-	20141822	ENST00000379593.1	ENSG00000173674.11	alternative	EIF1AX
-1.09805	2.13645	12.1028	0.000503452	0.073217	rDPI_434	chr1	11857604	11857616	chr1:11857604..11857616,chr1:11857558..11857680,-;peak:chr1:11857609..11857610,-;peakCounts:542.7	1307	-	11857609	ENST00000376468.4	ENSG00000120937.9	not_classified	NPPB
0.955455	4.33302	12.0937	0.000505915	0.0734116	rDPI_38360	chr3	157089881	157089887	chr3:157089881..157089887,chr3:157089787..157090116,+;peak:chr3:157089881..157089882,+;peakCounts:9431.1	12812	+	157089881	ENST00000467995.5	ENSG00000241135.6	promoter	NA
0.833035	1.71562	12.0757	0.000510824	0.0737323	rDPI_10220	chr11	111814735	111814741	chr11:111814735..111814741,chr11:111814631..111814790,-;peak:chr11:111814740..111814741,-;peakCounts:558	750	-	111814740	ENST00000527212.5	ENSG00000086848.15	alternative	ALG9
0.505313	1.19647	12.0713	0.000512027	0.0737323	rDPI_14731	chr14	22494687	22494708	chr14:22494687..22494708,chr14:22494643..22494771,+;peak:chr14:22494697..22494698,+;peakCounts:72	369	+	22494697	ENST00000390493.1	ENSG00000211845.1	enhancer	TRAJ44
0.955954	3.50348	12.0709	0.00051215	0.0737323	rDPI_21421	chr17	28370334	28370349	chr17:28370334..28370349,chr17:28370224..28370425,-;peak:chr17:28370339..28370340,-;peakCounts:1238.7	5451	-	28370339	ENST00000226218.9	ENSG00000109072.14	alternative	VTN
-1.45663	2.36524	12.0691	0.000512641	0.0737323	rDPI_34821	chr22	22380833	22380834	chr22:22380833..22380834,chr22:22380815..22380889,+;peak:chr22:22380833..22380834,+;peakCounts:2166.3	2407	+	22380833	ENST00000390297.3	ENSG00000211651.3	promoter	IGLV1-44
0.611595	1.9885	12.0488	0.000518267	0.0743776	rDPI_7193	chr10	101967175	101967190	chr10:101967175..101967190,chr10:101967087..101967272,-;peak:chr10:101967184..101967185,-;peakCounts:582.3	1024	-	101967184	ENST00000410498.1	ENSG00000222430.1	enhancer	NA
-0.504093	3.17211	12.0438	0.000519643	0.0744115	rDPI_53773	chrX	24149449	24149474	chrX:24149449..24149474,chrX:24149320..24149524,+;peak:chrX:24149458..24149459,+;peakCounts:749.7	5039	+	24149458	ENST00000428571.5	ENSG00000005889.16	alternative	ZFX
-0.836157	2.96633	12.0062	0.000530231	0.0756855	rDPI_17690	chr15	63062587	63062592	chr15:63062587..63062592,chr15:63062572..63062648,+;peak:chr15:63062589..63062590,+;peakCounts:1301.8	2648	+	63062589	ENST00000651622.1	ENSG00000140416.23	alternative	TPM1
-0.641506	1.46388	12.004	0.000530858	0.0756855	rDPI_54250	chrX	70479070	70479080	chrX:70479070..70479080,chrX:70479044..70479096,+;peak:chrX:70479075..70479076,+;peakCounts:386.1	646	+	70479075	ENST00000466140.5	ENSG00000082458.12	promoter	DLG3
-0.662384	1.5219	11.9668	0.000541577	0.0770455	rDPI_47236	chr7	36389857	36389872	chr7:36389857..36389872,chr7:36389747..36389872,+;peak:chr7:36389862..36389863,+;peakCounts:220.5	672	+	36389862	ENST00000265748.7	ENSG00000011426.11	promoter	ANLN
0.718002	4.5545	11.9599	0.00054358	0.0771624	rDPI_7191	chr10	101939952	101939958	chr10:101939952..101939958,chr10:101939872..101940060,-;peak:chr10:101939957..101939958,-;peakCounts:12161.7	14478	-	101939957	ENST00000410498.1	ENSG00000222430.1	enhancer	NA
-0.416707	1.40872	11.9203	0.000555243	0.0784218	rDPI_37287	chr3	69386246	69386259	chr3:69386246..69386259,chr3:69386001..69386424,-;peak:chr3:69386253..69386254,-;peakCounts:269.1	582	-	69386253	ENST00000473188.5	ENSG00000114541.15	alternative	FRMD4B
0.679485	4.90975	11.9203	0.000555268	0.0784218	rDPI_48746	chr7	131108089	131108105	chr7:131108089..131108105,chr7:131107877..131108191,-;peak:chr7:131108097..131108098,-;peakCounts:4782.9	13183	-	131108097	ENST00000643135.1	ENSG00000231721.7	promoter	LINC-PINT
0.481066	1.2599	11.9104	0.000558225	0.0784218	rDPI_6071	chr10	48274781	48274797	chr10:48274781..48274797,chr10:48274755..48274899,-;peak:chr10:48274792..48274793,-;peakCounts:104	301	-	48274792	ENST00000374201.8	ENSG00000170324.21	alternative	FRMPD2
-0.725185	1.83064	11.9046	0.000559958	0.0784218	rDPI_10371	chr11	117203397	117203415	chr11:117203397..117203415,chr11:117203304..117203507,+;peak:chr11:117203409..117203410,+;peakCounts:462.6	1191	+	117203409	ENST00000529622.1	ENSG00000149591.17	enhancer	TAGLN
0.511046	7.02186	11.9036	0.000560256	0.0784218	rDPI_14309	chr13	75537840	75537844	chr13:75537840..75537844,chr13:75537766..75537899,-;peak:chr13:75537841..75537842,-;peakCounts:59456.7	75359	-	75537841	ENST00000355801.4	ENSG00000188243.13	promoter	COMMD6
-0.826481	4.89652	11.9025	0.000560584	0.0784218	rDPI_37890	chr3	127823185	127823191	chr3:127823185..127823191,chr3:127823106..127823510,-;peak:chr3:127823185..127823186,-;peakCounts:11040.3	13232	-	127823185	ENST00000434178.6	ENSG00000074416.14	promoter	MGLL
-0.442588	1.97925	11.9016	0.000560859	0.0784218	rDPI_37221	chr3	64268194	64268198	chr3:64268194..64268198,chr3:64268084..64268225,-;peak:chr3:64268197..64268198,-;peakCounts:616.8	1050	-	64268197	ENST00000564377.6	ENSG00000163637.13	alternative	PRICKLE2
-0.721964	2.09792	11.8941	0.000563125	0.0785703	rDPI_37539	chr3	108222421	108222427	chr3:108222421..108222427,chr3:108222324..108222495,-;peak:chr3:108222424..108222425,-;peakCounts:167.9	755	-	108222424	ENST00000264538.4	ENSG00000114446.5	alternative	IFT57
1.1211	1.96161	11.8763	0.00056853	0.0791553	rDPI_53880	chrX	43736222	43736243	chrX:43736222..43736243,chrX:43736184..43736275,+;peak:chrX:43736238..43736239,+;peakCounts:259.2	1363	+	43736238	ENST00000490604.1	ENSG00000189221.10	enhancer	MAOA
0.718401	1.62696	11.8638	0.000572342	0.0795166	rDPI_13107	chr12	110614100	110614107	chr12:110614100..110614107,chr12:110614020..110614204,+;peak:chr12:110614103..110614104,+;peakCounts:608.3	1266	+	110614103	ENST00000498072.5	ENSG00000204852.17	alternative	TCTN1
0.46378	2.45786	11.8555	0.000574911	0.0797039	rDPI_19751	chr16	53503013	53503019	chr16:53503013..53503019,chr16:53502917..53503068,-;peak:chr16:53503016..53503017,-;peakCounts:837.7	2475	-	53503016	ENST00000566045.5	ENSG00000166971.17	alternative	AKTIP
0.457165	1.20761	11.8494	0.000576814	0.0797984	rDPI_10719	chr11	131911407	131911427	chr11:131911407..131911427,chr11:131911336..131911461,+;peak:chr11:131911418..131911419,+;peakCounts:119.8	417	+	131911418	ENST00000479431.1	ENSG00000182667.14	alternative	NTM
0.53661	1.88007	11.8192	0.00058624	0.0808373	rDPI_51151	chr9	547175	547186	chr9:547175..547186,chr9:547041..547250,+;peak:chr9:547180..547181,+;peakCounts:398.2	1298	+	547180	ENST00000654035.1	ENSG00000226403.2	alternative	NA
-0.742232	1.61809	11.8157	0.000587327	0.0808373	rDPI_13216	chr12	112938501	112938505	chr12:112938501..112938505,chr12:112938273..112938602,+;peak:chr12:112938503..112938504,+;peakCounts:390.7	964	+	112938503	ENST00000681527.1	ENSG00000111331.14	alternative	OAS3
0.55308	4.07566	11.8132	0.000588128	0.0808373	rDPI_54442	chrX	101659782	101659924	chrX:101659782..101659924,chrX:101659782..101659924,-	9019	-	101659850	ENST00000328766.9	ENSG00000184867.14	promoter	ARMCX2
-0.428506	1.08924	11.8096	0.000589276	0.0808373	rDPI_15053	chr14	23414406	23414413	chr14:23414406..23414413,chr14:23414369..23414453,-;peak:chr14:23414409..23414410,-;peakCounts:115.8	193	-	23414409	ENST00000401172.1	ENSG00000215991.1	alternative	MIR208B
-0.449824	1.58902	11.8021	0.000591631	0.0809902	rDPI_53896	chrX	44873216	44873225	chrX:44873216..44873225,chrX:44873155..44873243,+;peak:chrX:44873221..44873222,+;peakCounts:298.8	1016	+	44873221	ENST00000611820.5	ENSG00000147050.16	alternative	KDM6A
-0.832158	3.95703	11.777	0.000599655	0.0818627	rDPI_47795	chr7	80602189	80602195	chr7:80602189..80602195,chr7:80602114..80602430,+;peak:chr7:80602189..80602190,+;peakCounts:684.099999999999	9502	+	80602189	ENST00000534394.5	ENSG00000135218.19	alternative	CD36
-0.6241	6.00652	11.7744	0.000600512	0.0818627	rDPI_35734	chr22	49960767	49960777	chr22:49960767..49960777,chr22:49960726..49960830,+;peak:chr22:49960773..49960774,+;peakCounts:16939.8	55555	+	49960773	ENST00000467480.1	ENSG00000198355.5	promoter	PIM3
0.411678	4.51836	11.7559	0.000606517	0.082509	rDPI_54141	chrX	54808373	54808385	chrX:54808373..54808385,chrX:54808301..54808430,+;peak:chrX:54808379..54808380,+;peakCounts:8826.3	15018	+	54808379	ENST00000375060.5	ENSG00000102316.17	promoter	MAGED2
-1.03516	1.4053	11.7208	0.000618055	0.0836829	rDPI_12	chr1	630310	630316	chr1:630310..630316,chr1:630243..630318,+;peak:chr1:630315..630316,+;peakCounts:130.7	666	+	630315	ENST00000457540.1	ENSG00000225630.1	alternative	MTND2P28
-0.402957	5.60274	11.719	0.000618653	0.0836829	rDPI_20037	chr16	67173937	67173963	chr16:67173937..67173963,chr16:67173841..67174049,+;peak:chr16:67173957..67173958,+;peakCounts:7372.8	41886	+	67173957	ENST00000566871.5	ENSG00000140939.14	promoter	NOL3
0.506243	2.22813	11.718	0.00061899	0.0836829	rDPI_38149	chr3	139539683	139539694	chr3:139539683..139539694,chr3:139539505..139539758,-;peak:chr3:139539688..139539689,-;peakCounts:627.7	1570	-	139539688	ENST00000487424.2	ENSG00000114115.10	alternative	RBP1
0.467406	1.06452	11.7141	0.000620295	0.0836859	rDPI_38379	chr3	158105824	158105828	chr3:158105824..158105828,chr3:158105816..158105875,+;peak:chr3:158105824..158105825,+;peakCounts:123.9	288	+	158105824	ENST00000480820.5	ENSG00000174891.13	alternative	RSRC1
-0.561617	1.16636	11.6939	0.000627037	0.0844212	rDPI_3940	chr1	174874415	174874456	chr1:174874415..174874456,+	295	+	174874419	ENST00000478442.5	ENSG00000152061.23	promoter	RABGAP1L
-0.467506	2.00848	11.6783	0.000632326	0.0849581	rDPI_29609	chr2	131682491	131682505	chr2:131682491..131682505,chr2:131682483..131682563,+;peak:chr2:131682499..131682500,+;peakCounts:609.3	1664	+	131682499	ENST00000653458.1	ENSG00000287151.1	promoter	C2orf27A
0.796729	4.74314	11.6733	0.000634039	0.0850133	rDPI_6958	chr10	95414891	95414897	chr10:95414891..95414897,chr10:95414492..95415005,-;peak:chr10:95414896..95414897,-;peakCounts:11715.3	14152	-	95414896	ENST00000465489.1	ENSG00000095637.22	enhancer	SORBS1
-0.690415	2.10448	11.6609	0.000638292	0.0854081	rDPI_46612	chr6	170044463	170044492	chr6:170044463..170044492,chr6:170044426..170044551,+;peak:chr6:170044475..170044476,+;peakCounts:437.4	1737	+	170044475	ENST00000654612.1	ENSG00000287823.1	not_classified	NA
-0.57048	2.06413	11.6458	0.00064348	0.0859263	rDPI_40917	chr4	163613513	163613535	chr4:163613513..163613535,-	1191	-	163613532	ENST00000339875.9	ENSG00000145416.13	promoter	MARCHF1
0.388869	1.82959	11.6391	0.000645785	0.086058	rDPI_37166	chr3	58332923	58332930	chr3:58332923..58332930,chr3:58332864..58332982,+;peak:chr3:58332924..58332925,+;peakCounts:369.5	989	+	58332924	ENST00000484288.5	ENSG00000168297.16	alternative	PXK
-0.364991	1.63312	11.6268	0.000650095	0.0864561	rDPI_22802	chr17	68205461	68205465	chr17:68205461..68205465,chr17:68205418..68205574,+;peak:chr17:68205461..68205462,+;peakCounts:617.4	990	+	68205461	ENST00000674770.2	ENSG00000196704.14	alternative	AMZ2
0.402593	5.46228	11.6095	0.000656159	0.0870851	rDPI_43636	chr5	176361761	176361770	chr5:176361761..176361770,chr5:176361616..176361837,-;peak:chr5:176361764..176361765,-;peakCounts:10485.9	21907	-	176361764	ENST00000298569.9	ENSG00000122203.15	promoter	KIAA1191
0.321561	5.27014	11.5928	0.000662069	0.0876672	rDPI_1712	chr1	51878722	51878731	chr1:51878722..51878731,chr1:51878497..51878812,-;peak:chr1:51878727..51878728,-;peakCounts:17900.1	25404	-	51878727	ENST00000352171.12	ENSG00000078618.22	promoter	NRDC
-0.571888	1.61021	11.5896	0.00066323	0.0876672	rDPI_4500	chr1	205321745	205321752	chr1:205321745..205321752,chr1:205321743..205321802,-;peak:chr1:205321745..205321746,-;peakCounts:503.1	653	-	205321745	ENST00000367157.6	ENSG00000163545.11	promoter	NUAK2
-0.793179	2.42809	11.5749	0.000668484	0.0879968	rDPI_1644	chr1	46310206	46310224	chr1:46310206..46310224,chr1:46310150..46310242,+;peak:chr1:46310210..46310211,+;peakCounts:283.5	1401	+	46310210	ENST00000460947.1	ENSG00000173660.12	not_classified	UQCRH
1.62833	7.27411	11.574	0.00066882	0.0879968	rDPI_39537	chr4	47831340	47831343	chr4:47831340..47831343,chr4:47831053..47831483,+;peak:chr4:47831340..47831341,+;peakCounts:68729.4	88219	+	47831340	ENST00000652844.1	ENSG00000282917.2	promoter	LOC101927179
-0.841662	3.41229	11.5713	0.000669767	0.0879968	rDPI_47330	chr7	44139794	44139810	chr7:44139794..44139810,chr7:44139771..44139867,-;peak:chr7:44139806..44139807,-;peakCounts:606.7	3563	-	44139806	ENST00000446581.5	ENSG00000106631.8	alternative	MYL7
-1.52169	4.03304	11.5448	0.000679375	0.0890799	rDPI_438	chr1	11858239	11858265	chr1:11858239..11858265,chr1:11858217..11858495,-;peak:chr1:11858245..11858246,-;peakCounts:2709	10074	-	11858245	ENST00000376468.4	ENSG00000120937.9	not_classified	NPPB
0.44873	2.98076	11.5358	0.000682701	0.0893367	rDPI_13621	chr12	130839174	130839194	chr12:130839174..130839194,chr12:130839081..130839298,-;peak:chr12:130839180..130839181,-;peakCounts:848.4	3098	-	130839180	ENST00000392373.7	ENSG00000111450.14	alternative	STX2
0.41485	1.44352	11.5264	0.000686159	0.0894776	rDPI_49363	chr8	11808656	11808667	chr8:11808656..11808667,chr8:11808631..11808690,+;peak:chr8:11808666..11808667,+;peakCounts:464.4	748	+	11808666	ENST00000532266.5	ENSG00000079459.13	alternative	FDFT1
-0.682718	1.12213	11.5214	0.000688009	0.0894776	rDPI_5160	chr1	235069795	235069798	chr1:235069795..235069798,-	378	-	235069795	ENST00000628622.1	ENSG00000280587.1	enhancer	NA
0.416563	5.00439	11.5197	0.000688612	0.0894776	rDPI_9268	chr11	64317555	64317563	chr11:64317555..64317563,chr11:64317467..64317602,-;peak:chr11:64317558..64317559,-;peakCounts:12468.6	23093	-	64317558	ENST00000544844.6	ENSG00000173113.7	alternative	TRMT112
0.54004	1.37119	11.518	0.000689259	0.0894776	rDPI_19656	chr16	46740132	46740143	chr16:46740132..46740143,chr16:46740053..46740171,-;peak:chr16:46740137..46740138,-;peakCounts:290.8	529	-	46740137	ENST00000564731.5	ENSG00000140795.13	enhancer	MYLK3
0.580623	1.5733	11.5126	0.00069126	0.0895593	rDPI_43156	chr5	148452886	148452897	chr5:148452886..148452897,chr5:148452697..148453154,+;peak:chr5:148452891..148452892,+;peakCounts:493.6	834	+	148452891	ENST00000508176.1	ENSG00000145868.17	alternative	FBXO38
-0.480165	1.92313	11.4981	0.000696663	0.0899198	rDPI_16186	chr14	76310777	76310783	chr14:76310777..76310783,chr14:76310753..76310843,+;peak:chr14:76310777..76310778,+;peakCounts:833.4	1513	+	76310777	ENST00000512784.6	ENSG00000119715.15	promoter	ESRRB
-0.5392	1.76077	11.4947	0.000697938	0.0899198	rDPI_53809	chrX	37779999	37780010	chrX:37779999..37780010,chrX:37779994..37780105,+;peak:chrX:37780003..37780004,+;peakCounts:220.5	907	+	37780003	ENST00000378588.5	ENSG00000165168.8	alternative	CYBB
0.416444	2.2947	11.4916	0.000699126	0.0899198	rDPI_10419	chr11	118531192	118531195	chr11:118531192..118531195,chr11:118531139..118531234,+;peak:chr11:118531193..118531194,+;peakCounts:1825.2	2501	+	118531193	ENST00000527785.1	ENSG00000149582.16	alternative	TMEM25
0.452139	3.83047	11.4904	0.000699551	0.0899198	rDPI_28333	chr2	46915754	46915766	chr2:46915754..46915766,chr2:46915727..46915859,-;peak:chr2:46915761..46915762,-;peakCounts:2277.6	6256	-	46915761	ENST00000649435.1	ENSG00000180398.13	alternative	MCFD2
0.832231	1.752	11.472	0.000706523	0.0903815	rDPI_4181	chr1	196404260	196404271	chr1:196404260..196404271,chr1:196404157..196404300,-;peak:chr1:196404265..196404266,-;peakCounts:386.1	881	-	196404265	ENST00000466914.2	ENSG00000162687.19	enhancer	KCNT2
-0.516951	1.89517	11.4674	0.000708284	0.0903815	rDPI_14648	chr13	114234948	114234952	chr13:114234948..114234952,chr13:114234852..114235112,+;peak:chr13:114234951..114234952,+;peakCounts:593.3	986	+	114234951	ENST00000650489.1	ENSG00000130177.16	alternative	CDC16
0.447623	6.96409	11.4654	0.000709024	0.0903815	rDPI_44882	chr6	35468401	35468410	chr6:35468401..35468410,chr6:35468358..35468444,+;peak:chr6:35468404..35468405,+;peakCounts:17471.7	60837	+	35468404	ENST00000322203.7	ENSG00000198755.11	promoter	RPL10A
-0.571483	2.36202	11.4634	0.000709822	0.0903815	rDPI_28056	chr2	29014503	29014513	chr2:29014503..29014513,chr2:29014346..29014549,+;peak:chr2:29014512..29014513,+;peakCounts:387.3	2287	+	29014512	ENST00000465300.5	ENSG00000189350.13	alternative	TOGARAM2
0.49256	1.49132	11.4627	0.000710063	0.0903815	rDPI_24919	chr19	7917637	7917642	chr19:7917637..7917642,chr19:7917536..7917897,+;peak:chr19:7917641..7917642,+;peakCounts:535.8	835	+	7917641	ENST00000566166.1	ENSG00000260001.7	alternative	TGFBR3L
0.452846	1.47595	11.459	0.000711477	0.0903852	rDPI_33408	chr20	38085209	38085217	chr20:38085209..38085217,chr20:38085097..38085401,+;peak:chr20:38085212..38085213,+;peakCounts:23.6	805	+	38085212	ENST00000484683.1	ENSG00000101413.12	enhancer	RPRD1B
0.842319	1.89083	11.4532	0.000713723	0.0904945	rDPI_45911	chr6	122127176	122127195	chr6:122127176..122127195,+	1342	+	122127176	ENST00000363062.1	ENSG00000199932.1	alternative	RNU1-18P
0.448848	1.00567	11.4452	0.000716774	0.0905692	rDPI_39653	chr4	56821728	56821736	chr4:56821728..56821736,chr4:56821647..56821751,-;peak:chr4:56821731..56821732,-;peakCounts:80.3	174	-	56821731	ENST00000631082.1	ENSG00000128040.11	alternative	SPINK2
-1.19008	1.273	11.4444	0.000717086	0.0905692	rDPI_22458	chr17	53105956	53105959	chr17:53105956..53105959,chr17:53105939..53105995,+;peak:chr17:53105957..53105958,+;peakCounts:249.9	411	+	53105957	ENST00000574371.1	ENSG00000262902.1	alternative	MTCO1P40
-0.955694	4.95698	11.4353	0.000720633	0.0906764	rDPI_25600	chr19	18173757	18173919	chr19:18173757..18173919,chr19:18173757..18173919,+	17561	+	18173813	ENST00000407280.4	ENSG00000216490.4	promoter	IFI30
-0.787174	2.34981	11.4351	0.000720712	0.0906764	rDPI_22227	chr17	47222379	47222389	chr17:47222379..47222389,chr17:47222377..47222460,+;peak:chr17:47222381..47222382,+;peakCounts:581.4	1739	+	47222381	ENST00000570671.1	ENSG00000198336.9	not_classified	MYL4
-0.502561	3.19622	11.429	0.000723053	0.0907014	rDPI_8000	chr11	2445000	2445009	chr11:2445000..2445009,chr11:2444936..2445097,+;peak:chr11:2445008..2445009,+;peakCounts:4596.3	6296	+	2445008	ENST00000155840.12	ENSG00000053918.18	promoter	KCNQ1
-0.946488	2.03536	11.4274	0.000723689	0.0907014	rDPI_4043	chr1	182604389	182604390	chr1:182604389..182604390,-	1656	-	182604389	ENST00000367558.6	ENSG00000143333.7	promoter	RGS16
-0.641472	1.50277	11.4101	0.000730441	0.0913722	rDPI_14868	chr14	23389038	23389041	chr14:23389038..23389041,chr14:23388855..23389061,-;peak:chr14:23389039..23389040,-;peakCounts:375.6	678	-	23389039	ENST00000362287.2	ENSG00000199157.2	alternative	MIR208A
-0.653265	1.41619	11.4014	0.000733872	0.0915196	rDPI_27802	chr2	20637459	20637475	chr2:20637459..20637475,chr2:20637325..20637547,+;peak:chr2:20637463..20637464,+;peakCounts:47.5	523	+	20637463	ENST00000272224.5	ENSG00000143869.7	alternative	GDF7
-0.42095	1.76446	11.4	0.000734422	0.0915196	rDPI_53674	chrX	16786432	16786436	chrX:16786432..16786436,chrX:16786387..16786557,+;peak:chrX:16786432..16786433,+;peakCounts:263.7	1299	+	16786432	ENST00000398155.4	ENSG00000086712.13	alternative	TXLNG
-1.28398	2.20455	11.3918	0.000737678	0.0917334	rDPI_34829	chr22	22712379	22712383	chr22:22712379..22712383,+	2031	+	22712379	ENST00000390308.2	ENSG00000211662.2	enhancer	IGLV3-21
-0.723962	2.64765	11.3886	0.000738947	0.0917334	rDPI_28833	chr2	72144669	72144694	chr2:72144669..72144694,chr2:72144626..72144812,+;peak:chr2:72144678..72144679,+;peakCounts:987.3	3218	+	72144678	ENST00000412637.1	ENSG00000228568.1	enhancer	RPS15AP13
-0.646747	1.78319	11.38	0.000742378	0.0919844	rDPI_41121	chr4	185145888	185145894	chr4:185145888..185145894,chr4:185145738..185145902,+;peak:chr4:185145892..185145893,+;peakCounts:184.4	1030	+	185145892	ENST00000491736.1	ENSG00000151729.11	alternative	SLC25A4
0.457718	7.04425	11.3566	0.000751799	0.0929753	rDPI_22302	chr17	48831032	48831039	chr17:48831032..48831039,chr17:48830954..48831073,+;peak:chr17:48831036..48831037,+;peakCounts:41783.4	77489	+	48831036	ENST00000448105.6	ENSG00000136436.15	promoter	CALCOCO2
0.476313	1.55323	11.3461	0.000756057	0.0931557	rDPI_44927	chr6	36844493	36844499	chr6:36844493..36844499,chr6:36844205..36844611,-;peak:chr6:36844498..36844499,-;peakCounts:75	483	-	36844498	ENST00000657649.1	ENSG00000287891.1	alternative	NA
0.644348	1.07364	11.346	0.00075611	0.0931557	rDPI_24123	chr18	58551414	58551419	chr18:58551414..58551419,-	193	-	58551414	ENST00000589204.1	ENSG00000198796.7	enhancer	ALPK2
0.582736	1.07581	11.3389	0.000759015	0.0933375	rDPI_29621	chr2	134441317	134441329	chr2:134441317..134441329,chr2:134441291..134441381,+;peak:chr2:134441321..134441322,+;peakCounts:109.1	267	+	134441321	ENST00000281923.4	ENSG00000152127.9	alternative	MGAT5
-0.414155	1.7669	11.3211	0.000766306	0.0940568	rDPI_29701	chr2	149587326	149587352	chr2:149587326..149587352,chr2:149587305..149587370,-;peak:chr2:149587347..149587348,-;peakCounts:297.9	914	-	149587347	ENST00000428879.5	ENSG00000168288.13	alternative	MMADHC
-1.05181	3.2961	11.3089	0.000771361	0.0944997	rDPI_14057	chr13	42992231	42992252	chr13:42992231..42992252,chr13:42992170..42992311,-;peak:chr13:42992241..42992242,-;peakCounts:1904.4	4599	-	42992241	ENST00000313624.12	ENSG00000133106.15	promoter	EPSTI1
-0.797913	3.92602	11.2891	0.000779617	0.0951595	rDPI_32034	chr2	216633394	216633404	chr2:216633394..216633404,chr2:216633340..216633960,+;peak:chr2:216633394..216633395,+;peakCounts:4115	11499	+	216633394	ENST00000233809.9	ENSG00000115457.10	alternative	IGFBP2
0.487518	3.53153	11.289	0.000779661	0.0951595	rDPI_52199	chr9	104764165	104764176	chr9:104764165..104764176,chr9:104764096..104764255,+;peak:chr9:104764170..104764171,+;peakCounts:4694.4	7250	+	104764170	ENST00000460936.5	ENSG00000165028.12	alternative	NIPSNAP3B
-0.830647	2.1536	11.2741	0.000785947	0.0956396	rDPI_8402	chr11	19186273	19186289	chr11:19186273..19186289,chr11:19186219..19186358,-;peak:chr11:19186277..19186278,-;peakCounts:281.4	1151	-	19186277	ENST00000647990.1	ENSG00000129170.10	alternative	CSRP3
-0.932535	1.7276	11.2707	0.00078738	0.0956396	rDPI_11200	chr12	12891562	12891564	chr12:12891562..12891564,chr12:12891496..12891570,+;peak:chr12:12891562..12891563,+;peakCounts:994.5	1551	+	12891562	ENST00000014914.6	ENSG00000013588.9	promoter	GPRC5A
-0.609961	1.71123	11.2693	0.000787989	0.0956396	rDPI_25159	chr19	11578959	11578980	chr19:11578959..11578980,chr19:11578923..11579004,-;peak:chr19:11578970..11578971,-;peakCounts:225	946	-	11578970	ENST00000588524.5	ENSG00000102575.13	promoter	ACP5
-0.6336	3.05576	11.2646	0.000789995	0.0957051	rDPI_20420	chr16	85899162	85899164	chr16:85899162..85899164,+	5603	+	85899163	ENST00000268638.10	ENSG00000140968.11	promoter	IRF8
-0.419557	2.57757	11.2429	0.000799293	0.0964385	rDPI_3985	chr1	179082041	179082051	chr1:179082041..179082051,chr1:179081952..179082115,+;peak:chr1:179082041..179082042,+;peakCounts:763.6	2870	+	179082041	ENST00000367625.8	ENSG00000186283.14	alternative	TOR3A
-1.21617	4.07463	11.2395	0.000800732	0.0964385	rDPI_15135	chr14	23422250	23422281	chr14:23422250..23422281,chr14:23422171..23422328,-;peak:chr14:23422254..23422255,-;peakCounts:1897.2	13080	-	23422254	ENST00000401172.1	ENSG00000215991.1	alternative	MIR208B
0.696896	1.55145	11.2374	0.000801635	0.0964385	rDPI_1762	chr1	53090947	53090991	chr1:53090947..53090991,-	591	-	53090983	ENST00000488036.5	ENSG00000162383.13	promoter	SLC1A7
-0.876549	4.31285	11.2367	0.000801955	0.0964385	rDPI_10240	chr11	111908931	111908948	chr11:111908931..111908948,chr11:111908661..111908973,-;peak:chr11:111908942..111908943,-;peakCounts:4368.6	7834	-	111908942	ENST00000524660.1	ENSG00000109846.9	enhancer	CRYAB
0.4317	2.14816	11.2292	0.000805187	0.0965056	rDPI_3459	chr1	156291499	156291522	chr1:156291499..156291522,chr1:156291461..156291549,-;peak:chr1:156291516..156291517,-;peakCounts:267.3	1508	-	156291516	ENST00000480968.1	ENSG00000198715.13	promoter	GLMP
0.418271	2.06003	11.2286	0.000805469	0.0965056	rDPI_23911	chr18	36828800	36828808	chr18:36828800..36828808,chr18:36828707..36828859,-;peak:chr18:36828804..36828805,-;peakCounts:1099.8	1506	-	36828804	ENST00000587129.5	ENSG00000134779.15	alternative	TPGS2
0.474687	4.06834	11.2078	0.000814559	0.0974159	rDPI_13698	chr13	20161032	20161088	chr13:20161032..20161088,chr13:20160912..20161117,-;peak:chr13:20161050..20161051,-;peakCounts:937.8	8581	-	20161050	ENST00000241125.4	ENSG00000121743.4	promoter	GJA3
-0.703882	1.74607	11.1826	0.000825673	0.0985645	rDPI_45091	chr6	43017066	43017088	chr6:43017066..43017088,chr6:43017044..43017303,+;peak:chr6:43017071..43017072,+;peakCounts:748.8	1262	+	43017071	ENST00000332245.9	ENSG00000124702.18	enhancer	KLHDC3
0.521645	3.0125	11.1792	0.000827214	0.0985682	rDPI_7176	chr10	101818411	101818414	chr10:101818411..101818414,chr10:101817983..101818495,-;peak:chr10:101818411..101818412,-;peakCounts:2443.1	5672	-	101818411	ENST00000370094.7	ENSG00000198408.14	alternative	OGA
0.756242	1.04534	11.1664	0.000832899	0.0990282	rDPI_32677	chr20	174912	174928	chr20:174912..174928,chr20:174912..174986,-;peak:chr20:174922..174923,-;peakCounts:90	192	-	174922	ENST00000334391.5	ENSG00000185982.7	not_classified	DEFB128
0.399651	3.81111	11.1617	0.000835031	0.0990282	rDPI_26929	chr19	49114365	49114386	chr19:49114365..49114386,chr19:49114329..49114433,+;peak:chr19:49114370..49114371,+;peakCounts:2215.8	11045	+	49114370	ENST00000221459.7	ENSG00000104863.12	promoter	LIN7B
-0.747819	2.72427	11.1604	0.000835623	0.0990282	rDPI_37019	chr3	52451448	52451461	chr3:52451448..52451461,chr3:52451393..52451532,-;peak:chr3:52451453..52451454,-;peakCounts:586.3	1710	-	52451453	ENST00000461086.1	ENSG00000114854.8	alternative	TNNC1
-0.680752	2.94715	11.1483	0.000841079	0.0994941	rDPI_10780	chr12	991221	991229	chr12:991221..991229,chr12:991184..991338,+;peak:chr12:991225..991226,+;peakCounts:2068.7	3798	+	991225	ENST00000360905.9	ENSG00000082805.20	alternative	ERC1
0.846652	2.16078	11.1357	0.000846839	0.0999944	rDPI_44926	chr6	36844422	36844433	chr6:36844422..36844433,chr6:36844205..36844611,-;peak:chr6:36844427..36844428,-;peakCounts:598	1247	-	36844427	ENST00000657649.1	ENSG00000287891.1	alternative	NA
-0.471475	2.37549	11.1309	0.000849034	0.100073	rDPI_38538	chr3	172750718	172750732	chr3:172750718..172750732,chr3:172750681..172750792,+;peak:chr3:172750726..172750727,+;peakCounts:1284.3	2226	+	172750726	ENST00000392692.8	ENSG00000114346.14	promoter	ECT2
-0.437021	1.26121	11.1233	0.000852477	0.100152	rDPI_53567	chrX	5726180	5726198	chrX:5726180..5726198,-	392	-	5726194	ENST00000667403.1	ENSG00000236120.7	alternative	LOC101928228
0.488185	7.38771	11.1227	0.000852777	0.100152	rDPI_12908	chr12	108562594	108562599	chr12:108562594..108562599,chr12:108562501..108562732,+;peak:chr12:108562596..108562597,+;peakCounts:67058.1	111721	+	108562596	ENST00000311893.14	ENSG00000136003.16	alternative	ISCU
-0.390935	1.71485	11.1149	0.000856356	0.10026	rDPI_18457	chr15	90954881	90954907	chr15:90954881..90954907,chr15:90954858..90954937,+;peak:chr15:90954892..90954893,+;peakCounts:269.1	1204	+	90954892	ENST00000555155.5	ENSG00000166965.12	promoter	RCCD1
0.552557	1.73958	11.1113	0.000858022	0.10026	rDPI_34880	chr22	24155939	24155945	chr22:24155939..24155945,chr22:24155915..24156065,+;peak:chr22:24155939..24155940,+;peakCounts:859.2	1107	+	24155939	ENST00000337989.11	ENSG00000099991.18	alternative	CABIN1
-0.917121	1.81505	11.1098	0.000858706	0.10026	rDPI_37638	chr3	115623629	115623649	chr3:115623629..115623649,chr3:115623491..115623683,+;peak:chr3:115623635..115623636,+;peakCounts:160.2	967	+	115623635	ENST00000393780.3	ENSG00000172020.13	promoter	GAP43
-0.467037	1.63393	11.1074	0.000859833	0.10026	rDPI_8216	chr11	10807352	10807363	chr11:10807352..10807363,chr11:10807267..10807387,-;peak:chr11:10807361..10807362,-;peakCounts:140.9	449	-	10807361	ENST00000531647.6	ENSG00000110321.19	promoter	EIF4G2
-0.617853	1.05432	11.0996	0.000863486	0.100332	rDPI_19796	chr16	55760559	55760566	chr16:55760559..55760566,chr16:55760485..55760641,+;peak:chr16:55760565..55760566,+;peakCounts:86.8	310	+	55760565	ENST00000574030.5	ENSG00000228695.10	alternative	CES1P1
0.491003	2.54106	11.0995	0.000863529	0.100332	rDPI_3197	chr1	153628244	153628257	chr1:153628244..153628257,chr1:153628207..153628361,-;peak:chr1:153628250..153628251,-;peakCounts:1034.1	2577	-	153628250	ENST00000476133.5	ENSG00000189171.14	promoter	S100A13
0.44978	2.10376	11.0921	0.000866976	0.100411	rDPI_35303	chr22	37849313	37849332	chr22:37849313..37849332,chr22:37849300..37849353,-;peak:chr22:37849318..37849319,-;peakCounts:442.8	1580	-	37849318	ENST00000609454.5	ENSG00000100124.15	promoter	ANKRD54
0.398797	4.73128	11.0914	0.000867286	0.100411	rDPI_51306	chr9	15510967	15510979	chr9:15510967..15510979,chr9:15510858..15511027,-;peak:chr9:15510970..15510971,-;peakCounts:8681.4	17391	-	15510970	ENST00000380733.9	ENSG00000164985.15	promoter	PSIP1
-0.544863	1.26251	11.0809	0.000872225	0.100805	rDPI_14431	chr13	99307422	99307427	chr13:99307422..99307427,chr13:99307367..99307515,-;peak:chr13:99307426..99307427,-;peakCounts:85	434	-	99307426	ENST00000376414.5	ENSG00000169508.7	alternative	GPR183
0.482581	2.88556	11.0593	0.000882418	0.101716	rDPI_18622	chr16	397286	397299	chr16:397286..397299,chr16:397155..397382,+;peak:chr16:397298..397299,+;peakCounts:745	4690	+	397298	ENST00000433358.5	ENSG00000103202.13	alternative	NME4
0.702641	6.95368	11.0576	0.000883229	0.101716	rDPI_23488	chr18	3219963	3219974	chr18:3219963..3219974,chr18:3219650..3220211,-;peak:chr18:3219968..3219969,-;peakCounts:61106.4	76905	-	3219968	ENST00000356443.9	ENSG00000101605.13	alternative	MYOM1
-0.543521	4.24741	11.044	0.000889731	0.10189	rDPI_26984	chr19	49513256	49513267	chr19:49513256..49513267,chr19:49513124..49513325,+;peak:chr19:49513266..49513267,+;peakCounts:5558.4	13996	+	49513266	ENST00000599988.5	ENSG00000104870.13	promoter	FCGRT
-0.469516	3.22546	11.0406	0.000891365	0.10189	rDPI_22486	chr17	56914048	56914051	chr17:56914048..56914051,chr17:56913983..56914105,-;peak:chr17:56914048..56914049,-;peakCounts:3732.3	4742	-	56914048	ENST00000316881.9	ENSG00000121060.18	promoter	TRIM25
0.428491	7.6796	11.0405	0.000891446	0.10189	rDPI_54603	chrX	111621507	111621518	chrX:111621507..111621518,-	143791	-	111621517	ENST00000432307.1	ENSG00000225031.1	promoter	NA
-1.07184	2.95531	11.0391	0.000892081	0.10189	rDPI_35319	chr22	38202082	38202094	chr22:38202082..38202094,chr22:38201934..38202140,+;peak:chr22:38202088..38202089,+;peakCounts:1863.9	5024	+	38202088	ENST00000441709.1	ENSG00000185022.12	promoter	MAFF
0.539908	1.74241	11.0361	0.00089354	0.10189	rDPI_29205	chr2	98731076	98731084	chr2:98731076..98731084,chr2:98731060..98731174,-;peak:chr2:98731077..98731078,-;peakCounts:247.4	1065	-	98731077	ENST00000460768.1	ENSG00000071073.13	alternative	MGAT4A
-0.489836	2.05611	11.035	0.000894101	0.10189	rDPI_52769	chr9	128203401	128203411	chr9:128203401..128203411,chr9:128203332..128203438,+;peak:chr9:128203410..128203411,+;peakCounts:904.5	1853	+	128203410	ENST00000636280.1	ENSG00000106976.21	alternative	DNM1
-0.698044	2.26912	11.0261	0.000898362	0.102128	rDPI_28981	chr2	85410358	85410367	chr2:85410358..85410367,chr2:85410335..85410390,-;peak:chr2:85410363..85410364,-;peakCounts:628.2	1646	-	85410363	ENST00000263867.9	ENSG00000042493.16	promoter	CAPG
-0.384166	1.45354	11.0242	0.000899321	0.102128	rDPI_32484	chr2	234952051	234952058	chr2:234952051..234952058,chr2:234951950..234952159,+;peak:chr2:234952052..234952053,+;peakCounts:134.2	532	+	234952052	ENST00000484097.1	ENSG00000130147.16	alternative	SH3BP4
0.422951	5.94002	11.0148	0.000903889	0.102469	rDPI_11897	chr12	53727443	53727455	chr12:53727443..53727455,chr12:53727420..53727533,-;peak:chr12:53727451..53727452,-;peakCounts:13077	34690	-	53727451	ENST00000550804.6	ENSG00000012822.16	promoter	CALCOCO1
-0.51723	1.37711	11.0072	0.000907562	0.102667	rDPI_36089	chr3	15521705	15521715	chr3:15521705..15521715,chr3:15521632..15521830,-;peak:chr3:15521710..15521711,-;peakCounts:296.1	505	-	15521710	ENST00000383788.10	ENSG00000206561.14	alternative	COLQ
-0.607201	0.999033	11.0048	0.000908784	0.102667	rDPI_54607	chrX	111681326	111681328	chrX:111681326..111681328,+	201	+	111681327	ENST00000623148.3	ENSG00000101901.12	alternative	ALG13
0.315492	5.75587	10.9971	0.00091253	0.102693	rDPI_12015	chr12	55974085	55974104	chr12:55974085..55974104,chr12:55974011..55974147,+;peak:chr12:55974098..55974099,+;peakCounts:5402.5	39184	+	55974098	ENST00000549915.5	ENSG00000111540.16	promoter	RAB5B
0.388009	2.34968	10.9966	0.000912798	0.102693	rDPI_49610	chr8	22999907	22999942	chr8:22999907..22999942,chr8:22999525..23000035,+;peak:chr8:22999929..22999930,+;peakCounts:402.5	2216	+	22999929	ENST00000517528.1	ENSG00000008853.17	promoter	RHOBTB2
0.582909	0.920057	10.9915	0.00091532	0.102693	rDPI_11834	chr12	53053295	53053298	chr12:53053295..53053298,+	177	+	53053297	ENST00000551693.1	ENSG00000111077.18	enhancer	TNS2
-0.524918	1.39873	10.9886	0.00091676	0.102693	rDPI_49539	chr8	22133380	22133387	chr8:22133380..22133387,chr8:22133322..22133392,-;peak:chr8:22133384..22133385,-;peakCounts:365.4	555	-	22133384	ENST00000680789.1	ENSG00000168453.16	promoter	HR
0.373943	1.75431	10.9883	0.000916876	0.102693	rDPI_19674	chr16	46789923	46789928	chr16:46789923..46789928,-	1086	-	46789926	ENST00000569810.1	ENSG00000140795.13	promoter	MYLK3
-0.713749	2.24241	10.9791	0.000921441	0.103028	rDPI_6109	chr10	50061666	50061680	chr10:50061666..50061680,chr10:50061643..50061737,-;peak:chr10:50061671..50061672,-;peakCounts:621	1290	-	50061671	ENST00000649244.1	ENSG00000235618.8	not_classified	FAM21EP
-0.551838	3.28716	10.9719	0.00092503	0.103252	rDPI_38212	chr3	142889035	142889046	chr3:142889035..142889046,chr3:142888869..142889240,-;peak:chr3:142889040..142889041,-;peakCounts:334.3	4962	-	142889040	ENST00000461818.5	ENSG00000163710.9	alternative	PCOLCE2
-0.53291	1.07367	10.9619	0.000930062	0.103468	rDPI_25905	chr19	35031232	35031252	chr19:35031232..35031252,chr19:35031201..35031272,+;peak:chr19:35031237..35031238,+;peakCounts:45	188	+	35031237	ENST00000640135.1	ENSG00000105711.13	promoter	SCN1B
-0.667964	2.62133	10.9604	0.000930813	0.103468	rDPI_2137	chr1	78649828	78649835	chr1:78649828..78649835,chr1:78649763..78649895,+;peak:chr1:78649831..78649832,+;peakCounts:1460.7	2684	+	78649831	ENST00000370747.9	ENSG00000137965.11	promoter	IFI44
-0.708763	3.01175	10.9562	0.000932915	0.103468	rDPI_7076	chr10	97822445	97822493	chr10:97822445..97822493,chr10:97822333..97822518,+;peak:chr10:97822487..97822488,+;peakCounts:549	3131	+	97822487	ENST00000370602.6	ENSG00000155265.11	enhancer	GOLGA7B
0.526274	2.39234	10.9554	0.000933304	0.103468	rDPI_26836	chr19	48110825	48110834	chr19:48110825..48110834,chr19:48110710..48110882,-;peak:chr19:48110829..48110830,-;peakCounts:632.3	1950	-	48110829	ENST00000599111.5	ENSG00000105499.14	alternative	PLA2G4C
0.559798	1.08526	10.9465	0.000937793	0.10379	rDPI_10716	chr11	131910525	131910541	chr11:131910525..131910541,chr11:131910478..131910733,+;peak:chr11:131910535..131910536,+;peakCounts:122.1	416	+	131910535	ENST00000470371.1	ENSG00000182667.14	alternative	NTM
0.416316	1.1385	10.9275	0.000947487	0.104685	rDPI_45424	chr6	73394850	73394867	chr6:73394850..73394867,chr6:73394830..73394903,+;peak:chr6:73394862..73394863,+;peakCounts:136.8	410	+	73394862	ENST00000370336.5	ENSG00000080007.8	promoter	DDX43
0.371763	3.08428	10.9205	0.000951042	0.104872	rDPI_11628	chr12	47963597	47963601	chr12:47963597..47963601,chr12:47963549..47963689,+;peak:chr12:47963597..47963598,+;peakCounts:3167.8	4594	+	47963597	ENST00000552187.1	ENSG00000134291.12	alternative	TMEM106C
-0.44243	3.10341	10.9179	0.000952392	0.104872	rDPI_21204	chr17	15651643	15651653	chr17:15651643..15651653,chr17:15651602..15651697,-;peak:chr17:15651646..15651647,-;peakCounts:1577.7	3983	-	15651646	ENST00000455584.2	ENSG00000251537.4	promoter	NA
-0.397693	2.11092	10.9017	0.000960754	0.105615	rDPI_26372	chr19	40750863	40750883	chr19:40750863..40750883,chr19:40750843..40750915,+;peak:chr19:40750878..40750879,+;peakCounts:330.3	1652	+	40750878	ENST00000601253.5	ENSG00000077312.9	alternative	SNRPA
-0.689858	2.84669	10.8981	0.000962627	0.105633	rDPI_54934	chrX	149505301	149505309	chrX:149505301..149505309,chrX:149505049..149505373,-;peak:chrX:149505306..149505307,-;peakCounts:532.3	1916	-	149505306	ENST00000340855.11	ENSG00000010404.18	alternative	IDS
0.57617	2.66788	10.8928	0.000965384	0.105633	rDPI_19002	chr16	4937143	4937155	chr16:4937143..4937155,chr16:4937047..4937284,-;peak:chr16:4937148..4937149,-;peakCounts:990	2314	-	4937148	ENST00000345988.7	ENSG00000118898.16	promoter	PPL
-0.631443	1.89763	10.8895	0.000967113	0.105633	rDPI_34695	chr22	18150165	18150172	chr22:18150165..18150172,chr22:18150055..18150183,+;peak:chr22:18150171..18150172,+;peakCounts:492.3	1118	+	18150171	ENST00000215794.8	ENSG00000184979.10	promoter	USP18
0.451841	3.8841	10.889	0.00096739	0.105633	rDPI_24226	chr18	74291960	74291969	chr18:74291960..74291969,chr18:74291791..74292029,-;peak:chr18:74291963..74291964,-;peakCounts:1452.5	5782	-	74291963	ENST00000340533.9	ENSG00000166347.19	alternative	CYB5A
-0.512812	5.42175	10.8639	0.000980569	0.106893	rDPI_53986	chrX	48521822	48521841	chrX:48521822..48521841,chrX:48521742..48521904,+;peak:chrX:48521824..48521825,+;peakCounts:4291.9	20173	+	48521824	ENST00000495186.6	ENSG00000147155.11	promoter	EBP
0.513929	1.41588	10.8538	0.000985908	0.107282	rDPI_40210	chr4	99949053	99949062	chr4:99949053..99949062,chr4:99949039..99949147,-;peak:chr4:99949058..99949059,-;peakCounts:345.6	646	-	99949058	ENST00000527366.1	ENSG00000164032.12	enhancer	H2AZ1
-0.776067	2.80547	10.8466	0.000989773	0.107282	rDPI_42726	chr5	132866882	132866903	chr5:132866882..132866903,chr5:132866830..132867031,+;peak:chr5:132866892..132866893,+;peakCounts:680.4	2006	+	132866892	ENST00000480372.1	ENSG00000164405.11	alternative	UQCRQ
0.393988	1.48029	10.8389	0.000993893	0.107282	rDPI_14465	chr13	102845915	102845928	chr13:102845915..102845928,chr13:102845779..102846174,+;peak:chr13:102845920..102845921,+;peakCounts:87	781	+	102845920	ENST00000652613.1	ENSG00000134899.23	alternative	ERCC5
0.511805	1.02462	10.8376	0.000994608	0.107282	rDPI_40363	chr4	110637018	110637031	chr4:110637018..110637031,chr4:110636990..110637080,-;peak:chr4:110637023..110637024,-;peakCounts:28.2	170	-	110637023	ENST00000394595.8	ENSG00000164093.17	promoter	PITX2
0.409383	6.96131	10.8356	0.000995682	0.107282	rDPI_11134	chr12	10212903	10212917	chr12:10212903..10212917,chr12:10212837..10213153,+;peak:chr12:10212908..10212909,+;peakCounts:52884	90698	+	10212908	ENST00000537201.5	ENSG00000139112.11	promoter	GABARAPL1
-0.643687	2.66474	10.8332	0.000996981	0.107282	rDPI_9185	chr11	63976232	63976246	chr11:63976232..63976246,chr11:63976210..63976369,+;peak:chr11:63976240..63976241,+;peakCounts:757.8	1841	+	63976240	ENST00000535431.1	ENSG00000256100.1	enhancer	NA
0.365076	2.13472	10.8326	0.000997268	0.107282	rDPI_5432	chr10	135050	135061	chr10:135050..135061,chr10:134756..135122,+;peak:chr10:135055..135056,+;peakCounts:1096.7	1692	+	135055	ENST00000381591.5	ENSG00000015171.20	alternative	ZMYND11
1.26744	3.34136	10.8279	0.000999815	0.107282	rDPI_33549	chr20	45254564	45254565	chr20:45254564..45254565,-	4870	-	45254564	ENST00000338380.2	ENSG00000124107.5	promoter	SLPI
0.750588	2.34778	10.8274	0.00100007	0.107282	rDPI_40321	chr4	108762993	108763017	chr4:108762993..108763017,chr4:108762943..108763123,-;peak:chr4:108763012..108763013,-;peakCounts:297.3	1671	-	108763012	ENST00000411864.6	ENSG00000164089.9	alternative	ETNPPL
0.393919	4.83834	10.8265	0.00100057	0.107282	rDPI_51432	chr9	33265028	33265037	chr9:33265028..33265037,chr9:33264969..33265108,+;peak:chr9:33265032..33265033,+;peakCounts:11366.4	17799	+	33265032	ENST00000223500.9	ENSG00000086065.14	alternative	CHMP5
0.951488	2.04442	10.8186	0.00100486	0.107566	rDPI_35157	chr22	33873215	33873226	chr22:33873215..33873226,chr22:33873108..33873262,-;peak:chr22:33873220..33873221,-;peakCounts:1329.3	1780	-	33873220	ENST00000423375.2	ENSG00000133424.22	enhancer	LARGE1
0.371919	2.11623	10.8122	0.00100834	0.107762	rDPI_26752	chr19	46746461	46746463	chr19:46746461..46746463,chr19:46746427..46746494,-;peak:chr19:46746461..46746462,-;peakCounts:687.7	1724	-	46746461	ENST00000263280.11	ENSG00000090372.15	alternative	STRN4
-0.831965	1.49884	10.7983	0.00101596	0.108399	rDPI_3281	chr1	154191257	154191278	chr1:154191257..154191278,chr1:154191186..154191315,-;peak:chr1:154191269..154191270,-;peakCounts:83.6	573	-	154191269	ENST00000466010.1	ENSG00000143549.21	enhancer	TPM3
-0.573285	0.936123	10.792	0.0010194	0.108432	rDPI_40644	chr4	140568960	140568962	chr4:140568960..140568962,-	98	-	140568961	ENST00000262999.4	ENSG00000109424.4	promoter	UCP1
0.384089	2.63311	10.7916	0.00101959	0.108432	rDPI_48385	chr7	108569630	108569635	chr7:108569630..108569635,chr7:108569525..108569772,-;peak:chr7:108569630..108569631,-;peakCounts:1722.8	2481	-	108569630	ENST00000493722.1	ENSG00000177683.14	alternative	THAP5
-1.28581	2.74477	10.7876	0.0010218	0.10849	rDPI_5023	chr1	229431524	229431553	chr1:229431524..229431553,chr1:229431415..229431652,-;peak:chr1:229431529..229431530,-;peakCounts:369.2	2205	-	229431529	ENST00000366684.7	ENSG00000143632.14	enhancer	ACTA1
-0.343723	4.25992	10.7837	0.00102398	0.108546	rDPI_7018	chr10	97426250	97426256	chr10:97426250..97426256,chr10:97426090..97426258,+;peak:chr10:97426255..97426256,+;peakCounts:8775	11478	+	97426255	ENST00000473929.1	ENSG00000171314.9	promoter	PGAM1
0.430809	2.74957	10.7772	0.00102759	0.108752	rDPI_9003	chr11	61392627	61392651	chr11:61392627..61392651,chr11:61392554..61392652,+;peak:chr11:61392638..61392639,+;peakCounts:868.5	3347	+	61392638	ENST00000544795.5	ENSG00000187049.10	promoter	TMEM216
-0.813171	1.10627	10.7616	0.00103629	0.109495	rDPI_46687	chr7	1160130	1160135	chr7:1160130..1160135,chr7:1160112..1160230,-;peak:chr7:1160130..1160131,-;peakCounts:359.1	601	-	1160130	ENST00000397083.6	ENSG00000178381.12	alternative	ZFAND2A
0.91114	1.70696	10.7532	0.00104098	0.109812	rDPI_40820	chr4	153789080	153789086	chr4:153789080..153789086,chr4:153789066..153789128,-;peak:chr4:153789083..153789084,-;peakCounts:837.9	1254	-	153789083	ENST00000274063.5	ENSG00000145423.5	promoter	SFRP2
0.356232	4.24862	10.7452	0.00104551	0.110112	rDPI_2871	chr1	145964686	145964695	chr1:145964686..145964695,chr1:145964661..145964757,+;peak:chr1:145964690..145964691,+;peakCounts:4350	9793	+	145964690	ENST00000369314.2	ENSG00000121851.13	alternative	POLR3GL
0.550526	0.909005	10.7412	0.00104777	0.110173	rDPI_29620	chr2	134441291	134441297	chr2:134441291..134441297,chr2:134441291..134441381,+;peak:chr2:134441291..134441292,+;peakCounts:25.1	119	+	134441291	ENST00000281923.4	ENSG00000152127.9	alternative	MGAT5
0.556894	2.53764	10.7296	0.00105438	0.110437	rDPI_8129	chr11	8081203	8081234	chr11:8081203..8081234,chr11:8081154..8081344,+;peak:chr11:8081211..8081212,+;peakCounts:2009.7	5100	+	8081211	ENST00000299506.3	ENSG00000166402.9	promoter	TUB
-0.836984	2.96163	10.7287	0.00105487	0.110437	rDPI_37020	chr3	52451464	52451482	chr3:52451464..52451482,chr3:52451393..52451532,-;peak:chr3:52451468..52451469,-;peakCounts:541.3	2314	-	52451468	ENST00000461086.1	ENSG00000114854.8	alternative	TNNC1
-0.702812	2.24893	10.7278	0.00105536	0.110437	rDPI_27266	chr19	54662995	54663006	chr19:54662995..54663006,chr19:54662904..54663025,+;peak:chr19:54663000..54663001,+;peakCounts:777.6	1640	+	54663000	ENST00000430952.6	ENSG00000186818.12	promoter	LILRB4
-1.07733	2.09497	10.7236	0.00105778	0.110514	rDPI_435	chr1	11857642	11857665	chr1:11857642..11857665,chr1:11857558..11857680,-;peak:chr1:11857647..11857648,-;peakCounts:272.7	1241	-	11857647	ENST00000376468.4	ENSG00000120937.9	alternative	NPPB
-0.621882	1.52082	10.7174	0.00106134	0.110709	rDPI_6192	chr10	60778478	60778484	chr10:60778478..60778484,chr10:60778454..60778518,+;peak:chr10:60778478..60778479,+;peakCounts:620.1	765	+	60778478	ENST00000395284.8	ENSG00000170312.16	promoter	CDK1
0.368259	1.60102	10.7061	0.00106782	0.111138	rDPI_35711	chr22	46738266	46738270	chr22:46738266..46738270,chr22:46738016..46738316,-;peak:chr22:46738267..46738268,-;peakCounts:506.8	965	-	46738267	ENST00000216264.13	ENSG00000100422.14	alternative	CERK
-1.20138	1.9279	10.7043	0.00106886	0.111138	rDPI_11667	chr12	48865870	48865871	chr12:48865870..48865871,-	1873	-	48865870	ENST00000309739.6	ENSG00000172602.11	promoter	RND1
0.627266	1.19658	10.7009	0.00107084	0.111166	rDPI_16803	chr15	20506157	20506177	chr15:20506157..20506177,chr15:20506136..20506206,-;peak:chr15:20506170..20506171,-;peakCounts:58.5	326	-	20506170	ENST00000428453.5	ENSG00000180229.12	promoter	HERC2P3
0.702498	1.21484	10.6972	0.00107296	0.111179	rDPI_33177	chr20	33346768	33346772	chr20:33346768..33346772,-	202	-	33346770	ENST00000461710.5	ENSG00000101391.21	enhancer	CDK5RAP1
0.70608	1.74361	10.6923	0.00107581	0.111179	rDPI_3156	chr1	153375598	153375605	chr1:153375598..153375605,chr1:153375596..153375650,-;peak:chr1:153375599..153375600,-;peakCounts:495.9	734	-	153375599	ENST00000368737.5	ENSG00000163221.9	promoter	S100A12
0.660468	1.34605	10.6919	0.00107607	0.111179	rDPI_17477	chr15	52236059	52236067	chr15:52236059..52236067,chr15:52236058..52236169,-;peak:chr15:52236061..52236062,-;peakCounts:224.1	360	-	52236061	ENST00000559434.1	ENSG00000128833.13	alternative	MYO5C
0.655129	3.64743	10.6802	0.00108287	0.111204	rDPI_29808	chr2	160271305	160271314	chr2:160271305..160271314,chr2:160271218..160271360,-;peak:chr2:160271310..160271311,-;peakCounts:3505.5	6359	-	160271310	ENST00000664835.1	ENSG00000285373.2	promoter	LINC02478
0.829547	3.32985	10.6798	0.00108315	0.111204	rDPI_48414	chr7	112977229	112977231	chr7:112977229..112977231,chr7:112977174..112977286,-;peak:chr7:112977229..112977230,-;peakCounts:767.8	4124	-	112977229	ENST00000654962.1	ENSG00000234520.6	alternative	HRAT17
-0.550772	4.45949	10.6766	0.001085	0.111204	rDPI_1795	chr1	54548224	54548234	chr1:54548224..54548234,chr1:54548167..54548327,+;peak:chr1:54548228..54548229,+;peakCounts:7226.1	12947	+	54548228	ENST00000343744.7	ENSG00000162390.18	promoter	ACOT11
-0.476494	1.12443	10.6756	0.00108557	0.111204	rDPI_29163	chr2	96842574	96842579	chr2:96842574..96842579,chr2:96842567..96842746,-;peak:chr2:96842574..96842575,-;peakCounts:96.9	193	-	96842574	ENST00000476975.5	ENSG00000163126.15	alternative	ANKRD23
0.492268	1.73144	10.6697	0.00108903	0.111204	rDPI_36862	chr3	49803258	49803270	chr3:49803258..49803270,chr3:49803214..49803335,+;peak:chr3:49803263..49803264,+;peakCounts:690.3	1513	+	49803263	ENST00000333323.6	ENSG00000185614.7	promoter	INKA1
-0.445279	1.06673	10.6679	0.00109013	0.111204	rDPI_23888	chr18	35950509	35950520	chr18:35950509..35950520,chr18:35950478..35950529,-;peak:chr18:35950514..35950515,-;peakCounts:133.2	171	-	35950514	ENST00000586982.5	ENSG00000267627.5	enhancer	NA
-0.431413	4.60023	10.6662	0.00109109	0.111204	rDPI_50434	chr8	96493808	96493814	chr8:96493808..96493814,chr8:96493595..96494321,+;peak:chr8:96493813..96493814,+;peakCounts:11601.9	13824	+	96493813	ENST00000520233.1	ENSG00000169439.12	alternative	SDC2
0.42459	1.62385	10.6659	0.00109129	0.111204	rDPI_10630	chr11	125625892	125625899	chr11:125625892..125625899,chr11:125625872..125625925,-;peak:chr11:125625894..125625895,-;peakCounts:426.6	894	-	125625894	ENST00000530526.1	ENSG00000149557.14	promoter	FEZ1
0.539158	7.37476	10.6653	0.00109164	0.111204	rDPI_2556	chr1	109740250	109740457	chr1:109740250..109740457,chr1:109740250..109740457,-	83426	-	109740316	ENST00000486823.5	ENSG00000134202.11	promoter	GSTM3
0.409813	1.6388	10.6585	0.00109568	0.111389	rDPI_31469	chr2	180981118	180981127	chr2:180981118..180981127,chr2:180981067..180981226,+;peak:chr2:180981126..180981127,+;peakCounts:730.8	1109	+	180981126	ENST00000602710.5	ENSG00000170035.16	alternative	UBE2E3
0.767138	2.24018	10.6565	0.00109687	0.111389	rDPI_20556	chr17	1104227	1104238	chr17:1104227..1104238,chr17:1104150..1104306,-;peak:chr17:1104232..1104233,-;peakCounts:1345.2	1890	-	1104232	ENST00000620071.1	ENSG00000278794.1	alternative	NA
-0.423139	2.72012	10.6461	0.00110306	0.111844	rDPI_40645	chr4	140756350	140756380	chr4:140756350..140756380,chr4:140756301..140756423,-;peak:chr4:140756374..140756375,-;peakCounts:559.8	3400	-	140756374	ENST00000442267.3	ENSG00000109436.8	promoter	TBC1D9
-0.464686	1.3449	10.6299	0.00111276	0.112653	rDPI_912	chr1	26021778	26021780	chr1:26021778..26021780,chr1:26021741..26021800,+;peak:chr1:26021779..26021780,+;peakCounts:491.4	561	+	26021779	ENST00000374280.4	ENSG00000158008.10	promoter	EXTL1
0.480558	2.90688	10.6107	0.00112438	0.113442	rDPI_11677	chr12	49018747	49018753	chr12:49018747..49018753,chr12:49018736..49018856,-;peak:chr12:49018747..49018748,-;peakCounts:3369.8	5945	-	49018747	ENST00000552212.5	ENSG00000181929.13	alternative	PRKAG1
0.357336	5.70873	10.6083	0.0011258	0.113442	rDPI_43477	chr5	160419068	160419086	chr5:160419068..160419086,chr5:160419039..160419154,-;peak:chr5:160419081..160419082,-;peakCounts:6398.1	27079	-	160419081	ENST00000297151.9	ENSG00000164609.10	promoter	SLU7
0.375154	3.68924	10.6052	0.00112768	0.113442	rDPI_38946	chr3	196739962	196739980	chr3:196739962..196739980,chr3:196739760..196740159,+;peak:chr3:196739973..196739974,+;peakCounts:1372.2	7025	+	196739973	ENST00000327134.7	ENSG00000180370.10	alternative	PAK2
-0.716537	3.32473	10.604	0.00112841	0.113442	rDPI_52531	chr9	121332664	121332688	chr9:121332664..121332688,chr9:121332432..121332720,+;peak:chr9:121332669..121332670,+;peakCounts:1824.3	3880	+	121332669	ENST00000477553.1	ENSG00000148180.21	not_classified	GSN
0.483098	2.43478	10.5991	0.00113145	0.113442	rDPI_45915	chr6	122399706	122399709	chr6:122399706..122399709,chr6:122399550..122399746,+;peak:chr6:122399708..122399709,+;peakCounts:667.7	2313	+	122399708	ENST00000368455.9	ENSG00000025156.13	alternative	HSF2
-1.17555	4.17862	10.5969	0.00113277	0.113442	rDPI_15067	chr14	23415415	23415448	chr14:23415415..23415448,chr14:23415380..23415514,-;peak:chr14:23415439..23415440,-;peakCounts:2652.3	18352	-	23415439	ENST00000401172.1	ENSG00000215991.1	alternative	MIR208B
-0.961437	3.06967	10.596	0.00113332	0.113442	rDPI_27083	chr19	50658490	50658491	chr19:50658490..50658491,chr19:50658431..50658553,+;peak:chr19:50658490..50658491,+;peakCounts:4749.3	5277	+	50658490	ENST00000490451.1	ENSG00000235034.7	promoter	C19orf81
-0.398418	1.39463	10.5942	0.00113445	0.113442	rDPI_35649	chr22	45163853	45163859	chr22:45163853..45163859,chr22:45163676..45163884,-;peak:chr22:45163858..45163859,-;peakCounts:336.3	606	-	45163858	ENST00000426282.6	ENSG00000226328.7	alternative	NUP50-DT
0.44599	6.76656	10.5861	0.00113942	0.113765	rDPI_46236	chr6	144095573	144095579	chr6:144095573..144095579,chr6:144095461..144095639,-;peak:chr6:144095573..144095574,-;peakCounts:46297.8	52685	-	144095573	ENST00000367569.4	ENSG00000169976.7	promoter	SF3B5
-0.591054	2.08279	10.5746	0.00114653	0.114299	rDPI_52192	chr9	104094587	104094607	chr9:104094587..104094607,chr9:104094507..104094663,+;peak:chr9:104094592..104094593,+;peakCounts:591.3	1822	+	104094592	ENST00000374787.7	ENSG00000136824.19	alternative	SMC2
0.49595	1.22764	10.5716	0.00114836	0.114308	rDPI_19657	chr16	46740144	46740150	chr16:46740144..46740150,chr16:46740053..46740171,-;peak:chr16:46740149..46740150,-;peakCounts:325.8	404	-	46740149	ENST00000564731.5	ENSG00000140795.13	alternative	MYLK3
-0.421624	1.53349	10.5616	0.00115461	0.114636	rDPI_50639	chr8	110202950	110202974	chr8:110202950..110202974,chr8:110202886..110203007,+;peak:chr8:110202959..110202960,+;peakCounts:174.6	751	+	110202959	ENST00000530667.1	ENSG00000255402.1	alternative	NA
-0.751847	1.30684	10.5607	0.00115517	0.114636	rDPI_3280	chr1	154191211	154191225	chr1:154191211..154191225,chr1:154191186..154191315,-;peak:chr1:154191220..154191221,-;peakCounts:79.6	335	-	154191220	ENST00000466010.1	ENSG00000143549.21	alternative	TPM3
0.394762	1.43794	10.5576	0.00115709	0.114652	rDPI_2293	chr1	91713642	91713656	chr1:91713642..91713656,chr1:91713546..91713689,-;peak:chr1:91713647..91713648,-;peakCounts:270	497	-	91713647	ENST00000470600.1	ENSG00000069702.11	enhancer	TGFBR3
0.755521	2.52841	10.5403	0.001168	0.115533	rDPI_19867	chr16	57284667	57284673	chr16:57284667..57284673,chr16:57284624..57284730,-;peak:chr16:57284672..57284673,-;peakCounts:1740.6	2223	-	57284672	ENST00000219207.10	ENSG00000102934.10	promoter	PLLP
-0.447727	0.898785	10.5353	0.00117114	0.115533	rDPI_6111	chr10	50061703	50061705	chr10:50061703..50061705,chr10:50061643..50061737,-;peak:chr10:50061703..50061704,-;peakCounts:23	98	-	50061703	ENST00000649244.1	ENSG00000235618.8	alternative	FAM21EP
0.400689	2.87915	10.534	0.00117199	0.115533	rDPI_31840	chr2	203328389	203328395	chr2:203328389..203328395,chr2:203328203..203328522,+;peak:chr2:203328394..203328395,+;peakCounts:1715.9	2917	+	203328394	ENST00000416001.5	ENSG00000138443.17	alternative	ABI2
-0.73736	1.56673	10.5323	0.00117306	0.115533	rDPI_3485	chr1	156670106	156670145	chr1:156670106..156670145,chr1:156669469..156670255,-;peak:chr1:156670132..156670133,-;peakCounts:73.4	686	-	156670132	ENST00000368223.4	ENSG00000132688.11	alternative	NES
-0.943266	1.56017	10.5073	0.00118905	0.116932	rDPI_14174	chr13	49187646	49187668	chr13:49187646..49187668,-	1156	-	49187656	ENST00000446556.1	ENSG00000235957.1	alternative	NA
-0.483366	5.16916	10.5036	0.00119143	0.116989	rDPI_51782	chr9	70413943	70413970	chr9:70413943..70413970,chr9:70413763..70414174,-;peak:chr9:70413952..70413953,-;peakCounts:6864.3	22619	-	70413952	ENST00000377126.3	ENSG00000119138.4	enhancer	KLF9
-0.423637	1.22072	10.4973	0.00119548	0.11715	rDPI_23042	chr17	75878554	75878558	chr17:75878554..75878558,chr17:75878539..75878639,-;peak:chr17:75878554..75878555,-;peakCounts:135.4	341	-	75878554	ENST00000254816.6	ENSG00000132481.7	alternative	TRIM47
-0.47677	1.81556	10.494	0.00119761	0.11715	rDPI_51783	chr9	70414005	70414012	chr9:70414005..70414012,chr9:70413763..70414174,-;peak:chr9:70414008..70414009,-;peakCounts:17.3	1164	-	70414008	ENST00000377126.3	ENSG00000119138.4	alternative	KLF9
-0.527227	1.94798	10.4927	0.00119845	0.11715	rDPI_35733	chr22	49960754	49960755	chr22:49960754..49960755,chr22:49960726..49960830,+;peak:chr22:49960754..49960755,+;peakCounts:292.8	2175	+	49960754	ENST00000467480.1	ENSG00000198355.5	alternative	PIM3
0.367452	1.66005	10.4849	0.00120357	0.117475	rDPI_54373	chrX	81201908	81201919	chrX:81201908..81201919,chrX:81201875..81201954,-;peak:chrX:81201913..81201914,-;peakCounts:557.1	793	-	81201913	ENST00000358130.7	ENSG00000198157.11	promoter	HMGN5
-0.497205	2.53572	10.4756	0.00120961	0.117888	rDPI_40859	chr4	158171391	158171407	chr4:158171391..158171407,chr4:158171313..158171628,-;peak:chr4:158171401..158171402,-;peakCounts:1334.2	2350	-	158171401	ENST00000593260.1	ENSG00000164125.16	alternative	GASK1B
-1.02211	6.47922	10.4726	0.00121157	0.117903	rDPI_53458	chrM	9051	9062	chrM:9051..9062,chrM:8985..9331,+;peak:chrM:9056..9057,+;peakCounts:11968	42162	+	9056	ENST00000362079.2	ENSG00000198938.2	alternative	COX3
0.468609	4.21441	10.4495	0.00122682	0.119161	rDPI_18618	chr16	397193	397206	chr16:397193..397206,chr16:397155..397382,+;peak:chr16:397199..397200,+;peakCounts:4833	10638	+	397199	ENST00000448828.5	ENSG00000103202.13	promoter	NME4
-1.12814	3.77922	10.4475	0.00122814	0.119161	rDPI_15059	chr14	23415084	23415110	chr14:23415084..23415110,chr14:23414991..23415268,-;peak:chr14:23415094..23415095,-;peakCounts:2255.7	12596	-	23415094	ENST00000401172.1	ENSG00000215991.1	alternative	MIR208B
0.539108	7.42445	10.4391	0.00123378	0.119216	rDPI_12623	chr12	93377926	93377928	chr12:93377926..93377928,chr12:93377832..93378021,+;peak:chr12:93377926..93377927,+;peakCounts:110347.2	126932	+	93377926	ENST00000415493.7	ENSG00000173598.14	promoter	NUDT4
-0.508667	0.875306	10.4368	0.0012353	0.119216	rDPI_34086	chr21	8393525	8393530	chr21:8393525..8393530,chr21:8393483..8393555,+;peak:chr21:8393527..8393528,+;peakCounts:20.5	51	+	8393527	ENST00000613359.1	ENSG00000275215.1	alternative	RNA5-8SN3
0.813386	5.05339	10.4358	0.00123597	0.119216	rDPI_11931	chr12	54588640	54588648	chr12:54588640..54588648,chr12:54588409..54588726,-;peak:chr12:54588644..54588645,-;peakCounts:7535.7	17437	-	54588644	ENST00000257905.13	ENSG00000135447.17	alternative	PPP1R1A
0.427791	4.05285	10.4357	0.00123601	0.119216	rDPI_27155	chr19	52369923	52369952	chr19:52369923..52369952,+	10614	+	52369940	ENST00000422689.3	ENSG00000221923.9	promoter	ZNF880
-0.411793	1.73479	10.4281	0.00124111	0.119531	rDPI_6996	chr10	96720499	96720517	chr10:96720499..96720517,chr10:96720469..96720571,-;peak:chr10:96720509..96720510,-;peakCounts:196	691	-	96720509	ENST00000339364.10	ENSG00000155629.15	promoter	PIK3AP1
-0.975531	4.31289	10.4218	0.00124533	0.119761	rDPI_35838	chr3	4979455	4979478	chr3:4979455..4979478,chr3:4979396..4979703,+;peak:chr3:4979463..4979464,+;peakCounts:4087.8	13497	+	4979463	ENST00000256495.4	ENSG00000134107.5	promoter	BHLHE40
0.355679	1.57763	10.4115	0.00125232	0.120168	rDPI_11018	chr12	6873511	6873527	chr12:6873511..6873527,chr12:6873455..6873542,+;peak:chr12:6873521..6873522,+;peakCounts:234.4	769	+	6873521	ENST00000451612.5	ENSG00000240370.6	promoter	RPL13P5
0.365758	5.90352	10.4084	0.00125446	0.120168	rDPI_21088	chr17	8162944	8162954	chr17:8162944..8162954,chr17:8162819..8163019,-;peak:chr17:8162948..8162949,-;peakCounts:21183.3	30768	-	8162948	ENST00000316509.11	ENSG00000220205.9	promoter	VAMP2
-0.66119	1.71551	10.4074	0.00125509	0.120168	rDPI_17927	chr15	71547236	71547267	chr15:71547236..71547267,+	820	+	71547236	ENST00000357769.4	ENSG00000187720.14	promoter	THSD4
0.439093	3.52226	10.4015	0.00125916	0.120298	rDPI_18619	chr16	397211	397225	chr16:397211..397225,chr16:397155..397382,+;peak:chr16:397216..397217,+;peakCounts:3215	6721	+	397216	ENST00000382940.8	ENSG00000103202.13	alternative	NME4
-0.766581	1.2494	10.3999	0.00126024	0.120298	rDPI_37317	chr3	71785145	71785149	chr3:71785145..71785149,-	320	-	71785148	ENST00000295619.4	ENSG00000163421.9	promoter	PROK2
0.555377	3.10969	10.3973	0.00126197	0.120298	rDPI_39839	chr4	75724369	75724380	chr4:75724369..75724380,chr4:75724369..75724486,-;peak:chr4:75724372..75724373,-;peakCounts:1512.9	4370	-	75724372	ENST00000677583.1	ENSG00000138757.15	promoter	G3BP2
-0.424872	1.91525	10.3934	0.00126464	0.120304	rDPI_34867	chr22	23856749	23856766	chr22:23856749..23856766,chr22:23856734..23856838,+;peak:chr22:23856749..23856750,+;peakCounts:469.8	1418	+	23856749	ENST00000345044.10	ENSG00000133460.19	alternative	SLC2A11
-0.898723	1.17449	10.3919	0.00126571	0.120304	rDPI_12443	chr12	71663025	71663044	chr12:71663025..71663044,chr12:71662975..71663085,+;peak:chr12:71663031..71663032,+;peakCounts:164.7	475	+	71663031	ENST00000308086.3	ENSG00000173451.7	promoter	THAP2
0.489807	4.25265	10.3699	0.0012809	0.12157	rDPI_3195	chr1	153627531	153627537	chr1:153627531..153627537,chr1:153627491..153627677,-;peak:chr1:153627536..153627537,-;peakCounts:6707.6	16906	-	153627536	ENST00000392623.5	ENSG00000189171.14	alternative	S100A13
0.461662	3.946	10.3639	0.00128506	0.121671	rDPI_51220	chr9	4741098	4741104	chr9:4741098..4741104,chr9:4740941..4741373,-;peak:chr9:4741098..4741099,-;peakCounts:4298	8180	-	4741098	ENST00000381809.8	ENSG00000147853.17	alternative	AK3
0.551748	0.910966	10.3621	0.00128631	0.121671	rDPI_2840	chr1	145785095	145785096	chr1:145785095..145785096,-	101	-	145785095	ENST00000539368.2	ENSG00000265491.5	enhancer	RNF115
0.445649	2.64532	10.3588	0.0012886	0.121671	rDPI_19750	chr16	53503002	53503010	chr16:53503002..53503010,chr16:53502917..53503068,-;peak:chr16:53503006..53503007,-;peakCounts:479.7	2727	-	53503006	ENST00000566045.5	ENSG00000166971.17	alternative	AKTIP
-1.41599	6.639	10.3576	0.00128942	0.121671	rDPI_21592	chr17	34255285	34255287	chr17:34255285..34255287,chr17:34255192..34255428,+;peak:chr17:34255285..34255286,+;peakCounts:60665.4	78684	+	34255285	ENST00000580907.5	ENSG00000108691.9	promoter	CCL2
-0.597291	1.61902	10.3507	0.00129427	0.121953	rDPI_28247	chr2	40429457	40429469	chr2:40429457..40429469,chr2:40428498..40430305,-;peak:chr2:40429463..40429464,-;peakCounts:191.5	829	-	40429463	ENST00000407929.6	ENSG00000183023.18	alternative	SLC8A1
0.441019	6.36261	10.3426	0.00129992	0.122309	rDPI_24433	chr19	1269332	1269334	chr19:1269332..1269334,chr19:1269260..1269395,+;peak:chr19:1269332..1269333,+;peakCounts:44090.1	51849	+	1269332	ENST00000593283.5	ENSG00000099622.14	promoter	CIRBP
1.34983	3.47231	10.3362	0.00130444	0.122558	rDPI_34626	chr21	46348234	46348253	chr21:46348234..46348253,chr21:46348122..46348297,+;peak:chr21:46348243..46348244,+;peakCounts:1345.5	5159	+	46348243	ENST00000483844.1	ENSG00000160299.17	promoter	PCNT
-1.54767	5.07186	10.3208	0.00131541	0.123411	rDPI_39811	chr4	74099195	74099197	chr4:74099195..74099197,chr4:74099126..74099330,-;peak:chr4:74099195..74099196,-;peakCounts:20424.6	23950	-	74099195	ENST00000508487.3	ENSG00000081041.9	promoter	CXCL2
-0.486009	2.01898	10.3091	0.00132378	0.124017	rDPI_17945	chr15	72208672	72208684	chr15:72208672..72208684,chr15:72208619..72208899,-;peak:chr15:72208672..72208673,-;peakCounts:326	834	-	72208672	ENST00000563275.1	ENSG00000067225.19	enhancer	PKM
0.469669	2.48701	10.2982	0.00133157	0.124365	rDPI_46051	chr6	131135467	131135478	chr6:131135467..131135478,chr6:131135379..131135525,+;peak:chr6:131135470..131135471,+;peakCounts:1223.1	3775	+	131135470	ENST00000431975.7	ENSG00000118507.17	promoter	AKAP7
1.39054	1.81545	10.2971	0.00133236	0.124365	rDPI_34080	chr21	8393267	8393274	chr21:8393267..8393274,chr21:8393251..8393311,+;peak:chr21:8393268..8393269,+;peakCounts:838.8	1504	+	8393268	ENST00000613359.1	ENSG00000275215.1	alternative	RNA5-8SN3
0.63025	2.70797	10.2944	0.00133431	0.124365	rDPI_12736	chr12	101680373	101680380	chr12:101680373..101680380,chr12:101680124..101680525,+;peak:chr12:101680373..101680374,+;peakCounts:1941.4	3568	+	101680373	ENST00000549608.1	ENSG00000196091.15	alternative	MYBPC1
0.417288	1.24427	10.2933	0.00133511	0.124365	chr16:4239534-4240004	chr16	4239534	4240004	chr16:4239534-4240004	2	.	4239819	ENST00000537996.1	ENSG00000185739.13	promoter	SRL
0.388844	3.06526	10.2848	0.00134131	0.124765	rDPI_19084	chr16	11586945	11586951	chr16:11586945..11586951,chr16:11586901..11586989,-;peak:chr16:11586950..11586951,-;peakCounts:344.1	3031	-	11586950	ENST00000413364.6	ENSG00000189067.14	alternative	LITAF
0.545821	2.83412	10.2803	0.00134457	0.124823	rDPI_43314	chr5	151028363	151028386	chr5:151028363..151028386,chr5:151027905..151028785,+;peak:chr5:151028368..151028369,+;peakCounts:893.2	3056	+	151028368	ENST00000520059.1	ENSG00000211445.12	alternative	GPX3
-0.699815	3.06897	10.2787	0.00134576	0.124823	rDPI_8689	chr11	46696261	46696332	chr11:46696261..46696332,chr11:46696103..46696375,-;peak:chr11:46696295..46696296,-;peakCounts:555.3	4041	-	46696295	ENST00000528837.5	ENSG00000175220.12	enhancer	ARHGAP1
-0.795273	2.75588	10.2503	0.00136659	0.126575	rDPI_45884	chr6	118560190	118560210	chr6:118560190..118560210,chr6:118559305..118561061,+;peak:chr6:118560196..118560197,+;peakCounts:1343.7	3198	+	118560196	ENST00000659521.1	ENSG00000286339.1	alternative	NA
0.355113	3.77902	10.2418	0.00137296	0.126921	rDPI_19914	chr16	58129343	58129355	chr16:58129343..58129355,chr16:58129266..58129436,-;peak:chr16:58129350..58129351,-;peakCounts:2415.7	6456	-	58129350	ENST00000565880.1	ENSG00000070761.8	alternative	CFAP20
-0.627576	3.79048	10.2401	0.00137421	0.126921	rDPI_21395	chr17	27631205	27631229	chr17:27631205..27631229,chr17:27631156..27631265,+;peak:chr17:27631223..27631224,+;peakCounts:1363.5	7515	+	27631223	ENST00000448970.6	ENSG00000168961.17	promoter	LGALS9
0.570363	4.13934	10.2344	0.00137842	0.127004	rDPI_35062	chr22	31107536	31107545	chr22:31107536..31107545,chr22:31107380..31107619,-;peak:chr22:31107541..31107542,-;peakCounts:5771.9	9485	-	31107541	ENST00000460642.5	ENSG00000198832.10	alternative	SELENOM
0.400518	1.21802	10.2337	0.001379	0.127004	rDPI_13113	chr12	110640447	110640454	chr12:110640447..110640454,chr12:110640352..110640457,+;peak:chr12:110640452..110640453,+;peakCounts:160.5	355	+	110640452	ENST00000460357.1	ENSG00000204852.17	alternative	TCTN1
-0.527123	2.04663	10.231	0.00138097	0.127007	rDPI_42999	chr5	140564330	140564350	chr5:140564330..140564350,chr5:140564272..140564390,-;peak:chr5:140564344..140564345,-;peakCounts:450	1680	-	140564344	ENST00000509914.5	ENSG00000113108.20	promoter	APBB3
-0.570114	2.49749	10.2253	0.00138525	0.127221	rDPI_10414	chr11	118408995	118409081	chr11:118408995..118409081,chr11:118408995..118409081,+	2602	+	118409077	ENST00000527186.1	ENSG00000167283.8	enhancer	ATP5MG
-0.598605	0.998832	10.2166	0.00139185	0.127648	rDPI_51949	chr9	91424510	91424516	chr9:91424510..91424516,chr9:91424509..91424627,-;peak:chr9:91424512..91424513,-;peakCounts:81.8	196	-	91424512	ENST00000297689.4	ENSG00000165030.4	alternative	NFIL3
0.383063	3.79355	10.2136	0.00139411	0.127676	rDPI_27605	chr2	3379717	3379732	chr2:3379717..3379732,chr2:3379652..3379838,+;peak:chr2:3379722..3379723,+;peakCounts:4134.6	8247	+	3379722	ENST00000482645.1	ENSG00000171853.16	alternative	TRAPPC12
-0.369726	3.47732	10.2035	0.00140172	0.128132	rDPI_45271	chr6	52284737	52284747	chr6:52284737..52284747,chr6:52284632..52284818,-;peak:chr6:52284742..52284743,-;peakCounts:2742.3	4218	-	52284742	ENST00000596288.7	ENSG00000112118.20	alternative	MCM3
0.542613	4.00182	10.2018	0.00140302	0.128132	rDPI_13850	chr13	29428621	29428643	chr13:29428621..29428643,chr13:29428584..29428898,+;peak:chr13:29428626..29428627,+;peakCounts:1126	8219	+	29428626	ENST00000380808.6	ENSG00000132938.22	alternative	MTUS2
-0.765111	1.13901	10.1908	0.00141143	0.12872	rDPI_34092	chr21	8394241	8394251	chr21:8394241..8394251,+	417	+	8394241	ENST00000613359.1	ENSG00000275215.1	promoter	RNA5-8SN3
-0.440732	5.88643	10.1874	0.00141404	0.128779	rDPI_14000	chr13	39603162	39603199	chr13:39603162..39603199,chr13:39603096..39603252,-;peak:chr13:39603171..39603172,-;peakCounts:7229.7	27742	-	39603171	ENST00000379589.4	ENSG00000183722.9	promoter	LHFPL6
-0.810657	2.9059	10.1828	0.00141753	0.128916	rDPI_6751	chr10	89251774	89251781	chr10:89251774..89251781,chr10:89251769..89251971,-;peak:chr10:89251774..89251775,-;peakCounts:1551.4	3228	-	89251774	ENST00000336233.10	ENSG00000107798.18	alternative	LIPA
-0.472119	1.05731	10.1729	0.0014252	0.129433	rDPI_44104	chr6	13272715	13272728	chr6:13272715..13272728,+	326	+	13272727	ENST00000379335.8	ENSG00000112137.18	promoter	PHACTR1
1.04664	1.4018	10.1687	0.00142842	0.129519	rDPI_8988	chr11	61203513	61203517	chr11:61203513..61203517,+	781	+	61203515	ENST00000537954.5	ENSG00000229859.10	promoter	PGA3
0.458056	1.01306	10.1666	0.00143011	0.129519	rDPI_42913	chr5	138753287	138753298	chr5:138753287..138753298,chr5:138753231..138753347,-;peak:chr5:138753292..138753293,-;peakCounts:105.3	157	-	138753292	ENST00000520838.1	ENSG00000253404.1	alternative	LOC105379194
0.629521	4.76283	10.1633	0.00143265	0.12957	rDPI_1156	chr1	31938312	31938316	chr1:31938312..31938316,chr1:31938131..31938469,-;peak:chr1:31938315..31938316,-;peakCounts:4340.8	12382	-	31938315	ENST00000529477.5	ENSG00000184007.22	alternative	PTP4A2
-0.948346	2.88203	10.155	0.00143914	0.129925	rDPI_51396	chr9	32526192	32526202	chr9:32526192..32526202,chr9:32526176..32526262,-;peak:chr9:32526196..32526197,-;peakCounts:1474.2	3127	-	32526196	ENST00000379868.6	ENSG00000107201.11	promoter	DDX58
-0.764395	1.43782	10.1531	0.00144056	0.129925	rDPI_38113	chr3	138010275	138010295	chr3:138010275..138010295,chr3:138010097..138010401,+;peak:chr3:138010279..138010280,+;peakCounts:60.7	483	+	138010279	ENST00000479660.1	ENSG00000066405.13	alternative	CLDN18
-0.678994	3.73373	10.149	0.00144377	0.130034	rDPI_3838	chr1	169485937	169485945	chr1:169485937..169485945,chr1:169485681..169486024,-;peak:chr1:169485944..169485945,-;peakCounts:3624.3	7898	-	169485944	ENST00000236137.10	ENSG00000117479.15	promoter	SLC19A2
-0.613226	1.65485	10.1414	0.00144977	0.130395	rDPI_24515	chr19	2129541	2129549	chr19:2129541..2129549,chr19:2129511..2129687,-;peak:chr19:2129543..2129544,-;peakCounts:402.3	656	-	2129543	ENST00000644728.1	ENSG00000065000.19	ambiguous	AP3D1
0.360078	1.47965	10.1284	0.00146006	0.130799	rDPI_29104	chr2	95025671	95025682	chr2:95025671..95025682,chr2:95025626..95025774,+;peak:chr2:95025676..95025677,+;peakCounts:438.6	745	+	95025676	ENST00000489399.1	ENSG00000172005.11	alternative	MAL
-0.344453	2.19833	10.1283	0.00146006	0.130799	rDPI_28201	chr2	38602869	38602875	chr2:38602869..38602875,chr2:38602747..38603088,-;peak:chr2:38602869..38602870,-;peakCounts:1273.7	1784	-	38602869	ENST00000409328.5	ENSG00000143889.16	alternative	HNRNPLL
0.617677	0.978481	10.1281	0.00146026	0.130799	rDPI_37644	chr3	119173590	119173602	chr3:119173590..119173602,chr3:119173530..119173602,+;peak:chr3:119173601..119173602,+;peakCounts:70.2	159	+	119173601	ENST00000264234.8	ENSG00000114638.8	promoter	UPK1B
-0.572361	2.61	10.1244	0.00146322	0.130884	rDPI_4486	chr1	204828699	204828709	chr1:204828699..204828709,chr1:204828619..204828756,+;peak:chr1:204828703..204828704,+;peakCounts:1672.2	3444	+	204828703	ENST00000430393.6	ENSG00000163531.16	promoter	NFASC
-0.626482	1.16944	10.1179	0.00146838	0.131165	rDPI_24229	chr18	74390115	74390128	chr18:74390115..74390128,chr18:74390076..74390147,-;peak:chr18:74390122..74390123,-;peakCounts:288	447	-	74390122	ENST00000474180.1	ENSG00000235297.3	enhancer	NA
0.620653	0.989568	10.1062	0.00147775	0.131729	rDPI_18673	chr16	761078	761092	chr16:761078..761092,chr16:761022..761153,+;peak:chr16:761086..761087,+;peakCounts:26.5	163	+	761086	ENST00000382862.7	ENSG00000102854.16	alternative	MSLN
-0.401908	1.94325	10.105	0.00147871	0.131729	rDPI_14162	chr13	48533047	48533055	chr13:48533047..48533055,chr13:48533039..48533181,-;peak:chr13:48533051..48533052,-;peakCounts:901.2	2099	-	48533051	ENST00000344532.8	ENSG00000136161.13	alternative	RCBTB2
0.582127	1.65711	10.1003	0.00148247	0.131764	rDPI_6069	chr10	48274669	48274682	chr10:48274669..48274682,chr10:48274627..48274729,-;peak:chr10:48274674..48274675,-;peakCounts:363.6	616	-	48274674	ENST00000486151.5	ENSG00000170324.21	promoter	FRMPD2
0.603411	1.49238	10.0957	0.00148618	0.131764	rDPI_10218	chr11	111814668	111814685	chr11:111814668..111814685,chr11:111814631..111814790,-;peak:chr11:111814672..111814673,-;peakCounts:106	487	-	111814672	ENST00000527212.5	ENSG00000086848.15	alternative	ALG9
-0.594468	3.14275	10.0957	0.00148619	0.131764	rDPI_52120	chr9	98119209	98119224	chr9:98119209..98119224,chr9:98119163..98119283,-;peak:chr9:98119220..98119221,-;peakCounts:1008	3713	-	98119220	ENST00000375098.7	ENSG00000106785.15	promoter	TRIM14
0.618368	1.35063	10.0944	0.00148718	0.131764	rDPI_32923	chr20	10218852	10218865	chr20:10218852..10218865,chr20:10218826..10218900,+;peak:chr20:10218857..10218858,+;peakCounts:323.1	606	+	10218857	ENST00000304886.6	ENSG00000132639.13	promoter	SNAP25
-0.466181	1.47987	10.0769	0.00150137	0.132764	rDPI_41271	chr5	784743	784753	chr5:784743..784753,chr5:784676..784783,-;peak:chr5:784748..784749,-;peakCounts:291.3	590	-	784748	ENST00000508859.8	ENSG00000206077.14	alternative	ZDHHC11B
-0.79971	3.24953	10.0755	0.00150254	0.132764	rDPI_41128	chr4	185146912	185146929	chr4:185146912..185146929,chr4:185146799..185147140,+;peak:chr4:185146925..185146926,+;peakCounts:502.5	3363	+	185146925	ENST00000491736.1	ENSG00000151729.11	alternative	SLC25A4
-0.707065	5.40117	10.0658	0.0015105	0.133167	rDPI_38495	chr3	169765059	169765060	chr3:169765059..169765060,chr3:169764982..169765159,-;peak:chr3:169765059..169765060,-;peakCounts:30059.1	33399	-	169765059	ENST00000602385.1	ENSG00000270141.3	promoter	NA
0.289902	4.68275	10.0606	0.00151474	0.133167	rDPI_17254	chr15	43185404	43185415	chr15:43185404..43185415,chr15:43185246..43185510,+;peak:chr15:43185406..43185407,+;peakCounts:5107.9	16074	+	43185406	ENST00000569745.5	ENSG00000166946.14	alternative	CCNDBP1
0.684198	2.53466	10.06	0.0015152	0.133167	rDPI_54783	chrX	132411246	132411258	chrX:132411246..132411258,chrX:132411192..132411425,-;peak:chrX:132411252..132411253,-;peakCounts:763.2	1811	-	132411252	ENST00000473364.1	ENSG00000076770.14	alternative	MBNL3
-0.407895	1.66406	10.06	0.00151526	0.133167	rDPI_34847	chr22	23765982	23765990	chr22:23765982..23765990,chr22:23765966..23766027,-;peak:chr22:23765983..23765984,-;peakCounts:223.2	486	-	23765983	ENST00000523865.1	ENSG00000250479.9	enhancer	CHCHD10
-0.399537	2.44932	10.0535	0.0015206	0.133286	rDPI_25743	chr19	21358983	21359006	chr19:21358983..21359006,chr19:21358928..21359077,+;peak:chr19:21359000..21359001,+;peakCounts:691.2	2250	+	21359000	ENST00000380870.8	ENSG00000172687.13	promoter	ZNF738
0.616089	1.07478	10.0534	0.00152069	0.133286	rDPI_11725	chr12	49961872	49961873	chr12:49961872..49961873,+	345	+	49961872	ENST00000293599.7	ENSG00000161798.7	promoter	AQP5
0.499455	2.66392	10.0398	0.00153194	0.134092	rDPI_39870	chr4	76306761	76306767	chr4:76306761..76306767,chr4:76306494..76306915,+;peak:chr4:76306766..76306767,+;peakCounts:274.2	3015	+	76306766	ENST00000237642.7	ENSG00000118804.9	alternative	STBD1
-0.536844	1.55927	10.0281	0.00154167	0.134763	rDPI_50390	chr8	93957527	93957552	chr8:93957527..93957552,-	463	-	93957527	ENST00000466433.1	ENSG00000240509.1	enhancer	RPL34P18
0.681818	1.05375	10.0214	0.00154735	0.135079	rDPI_18537	chr15	99174850	99174867	chr15:99174850..99174867,chr15:99174813..99174867,+;peak:chr15:99174855..99174856,+;peakCounts:92.7	281	+	99174855	ENST00000564527.1	ENSG00000261616.1	enhancer	NA
0.721061	1.15973	10.0058	0.00156045	0.136035	rDPI_20127	chr16	68448497	68448509	chr16:68448497..68448509,-	326	-	68448506	ENST00000219334.10	ENSG00000103056.12	promoter	SMPD3
-0.992415	1.20275	10.0022	0.00156352	0.136035	rDPI_8847	chr11	50298445	50298462	chr11:50298445..50298462,chr11:50298380..50298493,-;peak:chr11:50298454..50298455,-;peakCounts:131.4	438	-	50298454	ENST00000636653.1	ENSG00000255042.3	promoter	SEPTIN7P11
-0.336088	3.0322	10.001	0.00156455	0.136035	rDPI_35549	chr22	42070804	42070818	chr22:42070804..42070818,chr22:42070708..42070874,-;peak:chr22:42070812..42070813,-;peakCounts:753.3	3414	-	42070812	ENST00000396398.8	ENSG00000198951.12	promoter	NAGA
1.00112	1.26964	9.99631	0.00156854	0.1362	rDPI_37406	chr3	96617946	96617948	chr3:96617946..96617948,chr3:96617906..96617981,-;peak:chr3:96617947..96617948,-;peakCounts:119.2	494	-	96617947	ENST00000600213.3	ENSG00000269028.3	alternative	MTRNR2L2
-0.414911	1.46759	9.98496	0.00157824	0.13686	rDPI_29169	chr2	96844055	96844061	chr2:96844055..96844061,chr2:96843970..96844160,-;peak:chr2:96844060..96844061,-;peakCounts:60.9	551	-	96844060	ENST00000318357.9	ENSG00000163126.15	alternative	ANKRD23
0.981745	2.80668	9.97228	0.00158914	0.137623	rDPI_32055	chr2	216695352	216695370	chr2:216695352..216695370,chr2:216695222..216695448,-;peak:chr2:216695357..216695358,-;peakCounts:788.4	2337	-	216695357	ENST00000233813.5	ENSG00000115461.5	alternative	IGFBP5
0.632069	2.35974	9.95527	0.0016039	0.138717	rDPI_39741	chr4	68376292	68376304	chr4:68376292..68376304,chr4:68376284..68376373,+;peak:chr4:68376297..68376298,+;peakCounts:2949.3	7912	+	68376297	ENST00000262499.5	ENSG00000162840.4	promoter	NA
0.332325	3.82801	9.94945	0.00160898	0.138774	rDPI_34959	chr22	28742034	28742058	chr22:28742034..28742058,chr22:28741997..28742109,+;peak:chr22:28742039..28742040,+;peakCounts:2074.5	7703	+	28742039	ENST00000216027.8	ENSG00000100209.11	promoter	HSCB
-0.39675	2.74738	9.94772	0.00161048	0.138774	rDPI_26357	chr19	40715072	40715120	chr19:40715072..40715120,chr19:40714958..40715124,-;peak:chr19:40715077..40715078,-;peakCounts:396.9	3039	-	40715077	ENST00000677800.1	ENSG00000123815.13	promoter	COQ8B
-0.37867	1.34456	9.94524	0.00161265	0.138774	rDPI_10611	chr11	125063305	125063306	chr11:125063305..125063306,chr11:125063213..125063308,+;peak:chr11:125063305..125063306,+;peakCounts:421.2	468	+	125063305	ENST00000403796.7	ENSG00000134955.12	alternative	SLC37A2
0.399925	1.34295	9.94165	0.0016158	0.138774	rDPI_53918	chrX	46573816	46573822	chrX:46573816..46573822,chrX:46573636..46573978,+;peak:chrX:46573820..46573821,+;peakCounts:378.1	815	+	46573820	ENST00000276055.4	ENSG00000147119.4	alternative	CHST7
0.596088	5.23248	9.93982	0.00161741	0.138774	rDPI_21804	chr17	39700058	39700072	chr17:39700058..39700072,chr17:39699876..39700084,+;peak:chr17:39700064..39700065,+;peakCounts:8958.6	27357	+	39700064	ENST00000269571.10	ENSG00000141736.14	alternative	ERBB2
-0.439556	1.11502	9.93869	0.00161841	0.138774	rDPI_27064	chr19	50344766	50344768	chr19:50344766..50344768,-	246	-	50344767	ENST00000534096.5	ENSG00000131401.11	promoter	NAPSB
0.651985	1.83601	9.93664	0.00162021	0.138774	rDPI_28227	chr2	39665478	39665486	chr2:39665478..39665486,chr2:39665334..39665501,+;peak:chr2:39665484..39665485,+;peakCounts:893.7	1715	+	39665484	ENST00000482239.5	ENSG00000152154.11	promoter	TMEM178A
-0.618916	1.54919	9.93511	0.00162156	0.138774	rDPI_6758	chr10	89327983	89327985	chr10:89327983..89327985,chr10:89327859..89328041,+;peak:chr10:89327983..89327984,+;peakCounts:576.1	764	+	89327983	ENST00000681277.1	ENSG00000119917.15	alternative	IFIT3
-0.981753	3.06088	9.92531	0.00163022	0.139332	rDPI_6757	chr10	89302046	89302048	chr10:89302046..89302048,chr10:89301942..89302068,+;peak:chr10:89302046..89302047,+;peakCounts:3729.6	4251	+	89302046	ENST00000371826.4	ENSG00000119922.11	promoter	IFIT2
0.52219	1.10696	9.91991	0.001635	0.139559	rDPI_29622	chr2	134441333	134441339	chr2:134441333..134441339,chr2:134441291..134441381,+;peak:chr2:134441338..134441339,+;peakCounts:242.1	297	+	134441338	ENST00000281923.4	ENSG00000152127.9	alternative	MGAT5
-0.642669	2.51288	9.90605	0.00164736	0.140248	rDPI_41106	chr4	185144849	185144856	chr4:185144849..185144856,chr4:185144758..185145272,+;peak:chr4:185144849..185144850,+;peakCounts:548.8	1862	+	185144849	ENST00000491736.1	ENSG00000151729.11	alternative	SLC25A4
0.596579	1.55313	9.90604	0.00164737	0.140248	rDPI_16861	chr15	26773073	26773080	chr15:26773073..26773080,chr15:26772997..26773152,-;peak:chr15:26773076..26773077,-;peakCounts:317.8	586	-	26773076	ENST00000622697.4	ENSG00000166206.15	alternative	GABRB3
0.677322	4.11508	9.90219	0.00165082	0.140358	rDPI_11932	chr12	54588657	54588660	chr12:54588657..54588660,chr12:54588409..54588726,-;peak:chr12:54588659..54588660,-;peakCounts:4879.7	7693	-	54588659	ENST00000257905.13	ENSG00000135447.17	alternative	PPP1R1A
-0.373568	1.63765	9.88752	0.00166404	0.141286	rDPI_19140	chr16	15395776	15395787	chr16:15395776..15395787,chr16:15395716..15395816,+;peak:chr16:15395781..15395782,+;peakCounts:775.8	1092	+	15395781	ENST00000568766.1	ENSG00000261130.5	alternative	MPV17L
0.630017	1.90172	9.88529	0.00166605	0.141286	rDPI_3004	chr1	150257862	150257880	chr1:150257862..150257880,chr1:150257774..150257953,+;peak:chr1:150257867..150257868,+;peakCounts:430.2	1197	+	150257867	ENST00000607652.5	ENSG00000118298.12	promoter	CA14
-0.326836	3.24852	9.88143	0.00166955	0.141398	rDPI_25670	chr19	19033600	19033616	chr19:19033600..19033616,chr19:19033549..19033752,+;peak:chr19:19033611..19033612,+;peakCounts:2070.9	7337	+	19033611	ENST00000540707.5	ENSG00000105676.14	promoter	ARMC6
0.669434	3.89964	9.875	0.00167539	0.141623	rDPI_38361	chr3	157089905	157089916	chr3:157089905..157089916,chr3:157089787..157090116,+;peak:chr3:157089910..157089911,+;peakCounts:5454.1	10042	+	157089910	ENST00000663887.1	ENSG00000241135.6	alternative	NA
-0.686248	1.71265	9.87375	0.00167654	0.141623	rDPI_52529	chr9	121332522	121332533	chr9:121332522..121332533,chr9:121332432..121332720,+;peak:chr9:121332527..121332528,+;peakCounts:58.3	888	+	121332527	ENST00000477553.1	ENSG00000148180.21	alternative	GSN
0.829492	2.78805	9.87097	0.00167907	0.141654	rDPI_20750	chr17	4705298	4705300	chr17:4705298..4705300,-	10875	-	4705299	ENST00000466297.1	ENSG00000213939.4	promoter	RPS12P29
0.344126	4.99192	9.85478	0.00169391	0.142297	rDPI_11629	chr12	47963603	47963614	chr12:47963603..47963614,chr12:47963549..47963689,+;peak:chr12:47963608..47963609,+;peakCounts:11026.8	21724	+	47963608	ENST00000552561.5	ENSG00000134291.12	promoter	TMEM106C
-0.37742	2.44222	9.85227	0.00169622	0.142297	rDPI_29137	chr2	96208847	96208850	chr2:96208847..96208850,chr2:96208464..96208879,-;peak:chr2:96208849..96208850,-;peakCounts:512.1	3031	-	96208849	ENST00000337288.10	ENSG00000084090.14	alternative	STARD7
-0.715146	2.7007	9.85202	0.00169645	0.142297	rDPI_1332	chr1	37474575	37474584	chr1:37474575..37474584,chr1:37474496..37474584,+;peak:chr1:37474580..37474581,+;peakCounts:1777.5	3620	+	37474580	ENST00000640233.1	ENSG00000163874.11	promoter	ZC3H12A
-0.72311	1.11218	9.85202	0.00169646	0.142297	rDPI_21051	chr17	7841942	7841948	chr17:7841942..7841948,chr17:7841901..7841956,+;peak:chr17:7841945..7841946,+;peakCounts:368.1	606	+	7841945	ENST00000572030.1	ENSG00000132510.11	ambiguous	KDM6B
0.390042	3.76978	9.84289	0.00170489	0.142297	rDPI_39893	chr4	77113450	77113457	chr4:77113450..77113457,-	5295	-	77113450	ENST00000603335.1	ENSG00000271676.1	promoter	LOC339966
-0.435056	2.27994	9.84287	0.00170491	0.142297	rDPI_40853	chr4	158170705	158170711	chr4:158170705..158170711,chr4:158170477..158170744,-;peak:chr4:158170708..158170709,-;peakCounts:816.9	1698	-	158170708	ENST00000593260.1	ENSG00000164125.16	alternative	GASK1B
0.645115	4.98314	9.84152	0.00170616	0.142297	rDPI_12875	chr12	106302812	106302820	chr12:106302812..106302820,chr12:106302726..106303143,+;peak:chr12:106302814..106302815,+;peakCounts:10319.4	20577	+	106302814	ENST00000546625.5	ENSG00000166046.11	promoter	TCP11L2
-0.493819	1.82521	9.84077	0.00170686	0.142297	rDPI_32121	chr2	218261015	218261024	chr2:218261015..218261024,+	1391	+	218261015	ENST00000522678.5	ENSG00000179921.15	promoter	GPBAR1
-0.477064	2.02592	9.83878	0.00170871	0.142297	rDPI_17415	chr15	50355460	50355471	chr15:50355460..50355471,chr15:50355449..50355502,+;peak:chr15:50355464..50355465,+;peakCounts:552.6	1756	+	50355464	ENST00000668321.1	ENSG00000244879.8	promoter	NA
-0.348375	1.87137	9.83812	0.00170932	0.142297	rDPI_18883	chr16	3024040	3024048	chr16:3024040..3024048,chr16:3024001..3024083,+;peak:chr16:3024043..3024044,+;peakCounts:814.5	1549	+	3024043	ENST00000574549.5	ENSG00000131652.14	alternative	THOC6
0.332817	3.00393	9.83667	0.00171067	0.142297	rDPI_19506	chr16	30355301	30355309	chr16:30355301..30355309,chr16:30355219..30355401,-;peak:chr16:30355306..30355307,-;peakCounts:2005.8	3749	-	30355306	ENST00000305596.8	ENSG00000169217.9	alternative	CD2BP2
0.343987	1.84355	9.83076	0.00171617	0.142573	rDPI_10739	chr11	134253320	134253322	chr11:134253320..134253322,chr11:134253268..134253415,-;peak:chr11:134253320..134253321,-;peakCounts:671.7	1019	-	134253320	ENST00000525677.1	ENSG00000151500.15	alternative	THYN1
0.435108	1.31137	9.82744	0.00171928	0.14265	rDPI_22948	chr17	75077498	75077525	chr17:75077498..75077525,-	388	-	75077517	ENST00000383986.1	ENSG00000206713.1	ambiguous	NA
-0.532026	1.21735	9.81368	0.00173218	0.143431	rDPI_27794	chr2	20448509	20448520	chr2:20448509..20448520,chr2:20448405..20449194,+;peak:chr2:20448514..20448515,+;peakCounts:118.7	468	+	20448514	ENST00000272233.6	ENSG00000143878.10	alternative	RHOB
0.546067	1.88016	9.81157	0.00173418	0.143431	rDPI_44312	chr6	26234988	26234990	chr6:26234988..26234990,chr6:26234926..26234993,-;peak:chr6:26234988..26234989,-;peakCounts:0	1008	-	26234989	ENST00000244534.7	ENSG00000124575.7	promoter	H1-3
-0.388354	1.34644	9.8104	0.00173528	0.143431	rDPI_55101	chrX	154547660	154547663	chrX:154547660..154547663,chrX:154547582..154547695,+;peak:chrX:154547662..154547663,+;peakCounts:262.1	514	+	154547662	ENST00000611176.4	ENSG00000269335.6	alternative	IKBKG
-0.536797	1.48253	9.80345	0.00174185	0.143792	rDPI_28495	chr2	61177425	61177432	chr2:61177425..61177432,chr2:61177386..61177571,+;peak:chr2:61177428..61177429,+;peakCounts:546.5	836	+	61177428	ENST00000463681.1	ENSG00000173209.23	alternative	AHSA2P
-0.575306	2.50983	9.79831	0.00174672	0.144012	rDPI_17683	chr15	63061712	63061717	chr15:63061712..63061717,chr15:63061710..63061790,+;peak:chr15:63061713..63061714,+;peakCounts:808.9	2149	+	63061713	ENST00000558072.5	ENSG00000140416.23	alternative	TPM1
-0.385198	1.10657	9.79196	0.00175277	0.144328	rDPI_41701	chr5	45696345	45696355	chr5:45696345..45696355,chr5:45696269..45696412,-;peak:chr5:45696350..45696351,-;peakCounts:69.6	197	-	45696350	ENST00000673735.1	ENSG00000164588.8	alternative	HCN1
-0.518299	1.34076	9.78892	0.00175566	0.144385	rDPI_19266	chr16	22814162	22814166	chr16:22814162..22814166,+	712	+	22814165	ENST00000261374.4	ENSG00000122254.7	promoter	HS3ST2
0.546632	5.64234	9.78652	0.00175796	0.144392	rDPI_45454	chr6	75493775	75493801	chr6:75493775..75493801,chr6:75493417..75493915,-;peak:chr6:75493780..75493781,-;peakCounts:16400.7	32515	-	75493780	ENST00000237172.12	ENSG00000118407.15	promoter	FILIP1
0.789325	1.70745	9.78342	0.00176092	0.144453	rDPI_45515	chr6	83512534	83512548	chr6:83512534..83512548,chr6:83512472..83512666,+;peak:chr6:83512536..83512537,+;peakCounts:638.1	1214	+	83512536	ENST00000369700.4	ENSG00000146250.7	promoter	PRSS35
-0.378476	2.13741	9.77591	0.00176813	0.144863	rDPI_2783	chr1	117367446	117367453	chr1:117367446..117367453,chr1:117367375..117367571,+;peak:chr1:117367449..117367450,+;peakCounts:1088.2	2187	+	117367449	ENST00000356554.7	ENSG00000198162.12	alternative	MAN1A2
-0.430429	1.10045	9.77052	0.00177332	0.145002	rDPI_47755	chr7	77245501	77245511	chr7:77245501..77245511,chr7:77245476..77245561,-;peak:chr7:77245505..77245506,-;peakCounts:143.5	225	-	77245505	ENST00000476561.2	ENSG00000250990.1	alternative	NA
0.423393	2.1248	9.76953	0.00177427	0.145002	rDPI_13849	chr13	29428606	29428613	chr13:29428606..29428613,chr13:29428584..29428898,+;peak:chr13:29428609..29428610,+;peakCounts:277	2063	+	29428609	ENST00000380808.6	ENSG00000132938.22	alternative	MTUS2
-0.951096	1.54941	9.76422	0.00177941	0.145163	rDPI_5021	chr1	229431508	229431520	chr1:229431508..229431520,chr1:229431415..229431652,-;peak:chr1:229431511..229431512,-;peakCounts:77.2	482	-	229431511	ENST00000366684.7	ENSG00000143632.14	alternative	ACTA1
0.461634	1.20883	9.76004	0.00178346	0.145163	rDPI_44352	chr6	27831592	27831631	chr6:27831592..27831631,-	413	-	27831612	ENST00000611927.2	ENSG00000273542.2	promoter	H4C12
-0.814311	1.26772	9.75672	0.00178668	0.145163	rDPI_29418	chr2	112836779	112836781	chr2:112836779..112836781,chr2:112836737..112836799,-;peak:chr2:112836779..112836780,-;peakCounts:1345.5	1505	-	112836779	ENST00000263341.7	ENSG00000125538.12	promoter	IL1B
0.46133	5.50576	9.75593	0.00178745	0.145163	rDPI_2439	chr1	101237010	101237020	chr1:101237010..101237020,chr1:101236756..101237086,+;peak:chr1:101237019..101237020,+;peakCounts:24725.7	33974	+	101237019	ENST00000305352.7	ENSG00000170989.10	promoter	S1PR1
0.362676	1.47627	9.75488	0.00178847	0.145163	rDPI_10155	chr11	107591240	107591253	chr11:107591240..107591253,chr11:107591200..107591353,+;peak:chr11:107591249..107591250,+;peakCounts:201.8	569	+	107591249	ENST00000443271.2	ENSG00000110675.13	alternative	ELMOD1
0.437955	2.02845	9.75373	0.00178959	0.145163	rDPI_45898	chr6	118894287	118894293	chr6:118894287..118894293,chr6:118893967..118894352,+;peak:chr6:118894292..118894293,+;peakCounts:674.7	1629	+	118894292	ENST00000511766.2	ENSG00000111875.8	alternative	ASF1A
0.700798	1.04742	9.7474	0.00179576	0.145483	rDPI_23840	chr18	33578415	33578416	chr18:33578415..33578416,-	195	-	33578415	ENST00000591558.1	ENSG00000267642.1	promoter	NA
0.324993	2.2936	9.73525	0.00180768	0.146267	rDPI_6420	chr10	72354962	72354976	chr10:72354962..72354976,chr10:72354867..72355023,-;peak:chr10:72354967..72354968,-;peakCounts:471.6	2887	-	72354967	ENST00000444643.7	ENSG00000148719.15	alternative	DNAJB12
-0.494916	5.0909	9.71326	0.00182944	0.147719	rDPI_24897	chr19	7629791	7629796	chr19:7629791..7629796,chr19:7629641..7629872,+;peak:chr19:7629793..7629794,+;peakCounts:7543.2	14338	+	7629793	ENST00000594797.6	ENSG00000229833.10	alternative	PET100
0.385626	2.81263	9.70993	0.00183275	0.147719	rDPI_15514	chr14	36320596	36320609	chr14:36320596..36320609,chr14:36320593..36320688,-;peak:chr14:36320598..36320599,-;peakCounts:1319.4	4190	-	36320598	ENST00000359527.11	ENSG00000151332.19	promoter	MBIP
0.327559	1.56538	9.70519	0.00183748	0.147719	rDPI_21584	chr17	32928171	32928176	chr17:32928171..32928176,chr17:32928001..32928223,+;peak:chr17:32928173..32928174,+;peakCounts:278.6	848	+	32928173	ENST00000579849.6	ENSG00000006042.12	alternative	TMEM98
-0.899008	2.80804	9.70421	0.00183847	0.147719	rDPI_18683	chr16	1072768	1072787	chr16:1072768..1072787,chr16:1072732..1072806,+;peak:chr16:1072783..1072784,+;peakCounts:992.7	3410	+	1072783	ENST00000293897.5	ENSG00000162009.8	enhancer	SSTR5
0.578162	1.49689	9.70315	0.00183952	0.147719	rDPI_10890	chr12	4626684	4626690	chr12:4626684..4626690,chr12:4626501..4626840,-;peak:chr12:4626689..4626690,-;peakCounts:325.2	561	-	4626689	ENST00000537929.1	ENSG00000256799.1	alternative	NA
0.35903	6.30698	9.70181	0.00184087	0.147719	rDPI_49445	chr8	17922990	17922995	chr8:17922990..17922995,chr8:17922746..17923174,+;peak:chr8:17922993..17922994,+;peakCounts:27624.6	52266	+	17922993	ENST00000517545.5	ENSG00000078674.18	promoter	PCM1
0.386406	4.45188	9.70068	0.001842	0.147719	rDPI_33208	chr20	33993906	33993920	chr20:33993906..33993920,chr20:33993609..33994128,+;peak:chr20:33993914..33993915,+;peakCounts:7237.8	15161	+	33993914	ENST00000246194.8	ENSG00000125970.12	alternative	RALY
0.281064	3.21877	9.69896	0.00184372	0.147719	rDPI_27580	chr19	58575460	58575469	chr19:58575460..58575469,chr19:58575385..58575541,+;peak:chr19:58575462..58575463,+;peakCounts:1375.5	4628	+	58575462	ENST00000493504.1	ENSG00000213753.11	alternative	CENPBD1P1
-0.567397	2.86289	9.69362	0.00184909	0.147898	rDPI_12311	chr12	63668462	63668482	chr12:63668462..63668482,chr12:63668426..63668753,-;peak:chr12:63668467..63668468,-;peakCounts:1628.5	3494	-	63668467	ENST00000324472.9	ENSG00000177990.12	alternative	DPY19L2
-0.775336	1.35002	9.6902	0.00185254	0.147898	rDPI_9481	chr11	65900415	65900420	chr11:65900415..65900420,chr11:65900321..65900492,-;peak:chr11:65900419..65900420,-;peakCounts:334.3	637	-	65900419	ENST00000448083.6	ENSG00000175592.9	alternative	FOSL1
-0.353234	2.27912	9.68999	0.00185275	0.147898	rDPI_6913	chr10	93893988	93894003	chr10:93893988..93894003,chr10:93893918..93894045,+;peak:chr10:93893997..93893998,+;peakCounts:805	1930	+	93893997	ENST00000483386.5	ENSG00000176273.15	alternative	SLC35G1
0.524106	1.07112	9.67923	0.00186362	0.148585	rDPI_42010	chr5	76953045	76953051	chr5:76953045..76953051,chr5:76953042..76953115,+;peak:chr5:76953045..76953046,+;peakCounts:235.8	293	+	76953045	ENST00000274368.9	ENSG00000145708.11	promoter	CRHBP
-0.673277	2.29897	9.67553	0.00186739	0.148703	rDPI_22226	chr17	47221820	47221830	chr17:47221820..47221830,chr17:47221672..47221853,+;peak:chr17:47221826..47221827,+;peakCounts:478	1599	+	47221826	ENST00000570671.1	ENSG00000198336.9	alternative	MYL4
-0.496185	1.00509	9.67118	0.00187181	0.148874	rDPI_4585	chr1	206772492	206772495	chr1:206772492..206772495,-	226	-	206772494	ENST00000423557.1	ENSG00000136634.7	promoter	IL10
0.603755	3.23219	9.66419	0.00187895	0.14926	rDPI_32876	chr20	5911402	5911408	chr20:5911402..5911408,chr20:5911323..5911647,+;peak:chr20:5911402..5911403,+;peakCounts:1388.8	4739	+	5911402	ENST00000378961.9	ENSG00000089199.10	alternative	CHGB
-1.32081	2.38084	9.6604	0.00188283	0.149386	rDPI_34129	chr21	8401697	8401709	chr21:8401697..8401709,chr21:8401628..8401712,+;peak:chr21:8401703..8401704,+;peakCounts:855.9	3359	+	8401703	ENST00000613359.1	ENSG00000275215.1	alternative	RNA5-8SN3
-0.513278	1.32712	9.65157	0.0018919	0.149747	rDPI_22229	chr17	47222422	47222426	chr17:47222422..47222426,chr17:47222377..47222460,+;peak:chr17:47222424..47222425,+;peakCounts:121.4	434	+	47222424	ENST00000570671.1	ENSG00000198336.9	alternative	MYL4
-0.519949	1.28303	9.64917	0.00189437	0.149747	rDPI_8247	chr11	11964318	11964331	chr11:11964318..11964331,chr11:11963884..11964687,-;peak:chr11:11964323..11964324,-;peakCounts:96.2	423	-	11964323	ENST00000532372.5	ENSG00000050165.18	alternative	DKK3
0.443734	3.61225	9.64741	0.00189619	0.149747	rDPI_37155	chr3	58008421	58008423	chr3:58008421..58008423,chr3:58008377..58008480,+;peak:chr3:58008422..58008423,+;peakCounts:6138.9	6935	+	58008422	ENST00000295956.9	ENSG00000136068.15	promoter	FLNB
-0.472118	1.90636	9.64574	0.00189792	0.149747	rDPI_18960	chr16	4416591	4416601	chr16:4416591..4416601,chr16:4416548..4416692,-;peak:chr16:4416596..4416597,-;peakCounts:344.8	697	-	4416596	ENST00000251166.9	ENSG00000262246.6	alternative	CORO7
-0.452729	1.8395	9.64288	0.00190087	0.149747	rDPI_30148	chr2	176201145	176201151	chr2:176201145..176201151,chr2:176201110..176201250,-;peak:chr2:176201145..176201146,-;peakCounts:244.4	684	-	176201145	ENST00000405359.2	ENSG00000218175.2	alternative	NA
-0.29977	5.6464	9.64262	0.00190114	0.149747	rDPI_1301	chr1	36149482	36149497	chr1:36149482..36149497,chr1:36149351..36149590,-;peak:chr1:36149486..36149487,-;peakCounts:6273.9	25577	-	36149486	ENST00000373166.8	ENSG00000054116.12	promoter	TRAPPC3
0.402298	2.62857	9.63463	0.00190942	0.150122	rDPI_44671	chr6	32177086	32177099	chr6:32177086..32177099,chr6:32176996..32177151,-;peak:chr6:32177093..32177094,-;peakCounts:744.8	3015	-	32177093	ENST00000395499.5	ENSG00000204310.13	alternative	AGPAT1
0.647481	1.35801	9.63219	0.00191196	0.150122	rDPI_12702	chr12	98457071	98457091	chr12:98457071..98457091,chr12:98457025..98457214,-;peak:chr12:98457080..98457081,-;peakCounts:127.8	506	-	98457080	ENST00000556476.1	ENSG00000227825.4	promoter	SLC9A7P1
-0.407433	1.26492	9.6314	0.00191279	0.150122	rDPI_46188	chr6	141404008	141404020	chr6:141404008..141404020,chr6:141403963..141404252,+;peak:chr6:141404014..141404015,+;peakCounts:284.7	489	+	141404014	ENST00000667537.1	ENSG00000286452.1	alternative	NA
-0.494656	1.26087	9.62021	0.00192448	0.150858	rDPI_7828	chr11	615628	615641	chr11:615628..615641,chr11:615614..615726,-;peak:chr11:615635..615636,-;peakCounts:141.3	369	-	615635	ENST00000649187.1	ENSG00000185507.21	alternative	IRF7
0.465537	1.80573	9.61727	0.00192757	0.150919	rDPI_25912	chr19	35135084	35135104	chr19:35135084..35135104,chr19:35134829..35135247,-;peak:chr19:35135096..35135097,-;peakCounts:106.4	915	-	35135096	ENST00000310123.8	ENSG00000153902.14	alternative	LGI4
0.577878	2.02352	9.59862	0.00194723	0.152276	rDPI_27621	chr2	3533914	3533923	chr2:3533914..3533923,chr2:3533826..3533991,-;peak:chr2:3533918..3533919,-;peakCounts:752.2	1519	-	3533918	ENST00000439547.5	ENSG00000242282.6	alternative	NA
-0.481738	0.868439	9.59414	0.001952	0.152466	rDPI_34130	chr21	8401897	8401904	chr21:8401897..8401904,+	49	+	8401897	ENST00000613359.1	ENSG00000275215.1	alternative	RNA5-8SN3
-0.58339	1.75656	9.59065	0.00195571	0.152473	rDPI_35703	chr22	46575704	46575722	chr22:46575704..46575722,chr22:46575620..46575786,+;peak:chr22:46575709..46575710,+;peakCounts:121.3	983	+	46575709	ENST00000447351.5	ENSG00000075240.17	alternative	GRAMD4
0.836843	1.81448	9.58966	0.00195676	0.152473	rDPI_17540	chr15	57602714	57602715	chr15:57602714..57602715,chr15:57602641..57602721,+;peak:chr15:57602714..57602715,+;peakCounts:1186.2	1318	+	57602714	ENST00000569089.1	ENSG00000263155.6	enhancer	MYZAP
-0.751656	2.91746	9.57201	0.00197566	0.153762	rDPI_26054	chr19	36151738	36151755	chr19:36151738..36151755,chr19:36151645..36151757,-;peak:chr19:36151743..36151744,-;peakCounts:768.6	2091	-	36151743	ENST00000437291.6	ENSG00000161281.11	enhancer	COX7A1
0.337674	1.58988	9.56712	0.00198094	0.15399	rDPI_51599	chr9	35732322	35732328	chr9:35732322..35732328,chr9:35732275..35732745,+;peak:chr9:35732322..35732323,+;peakCounts:501.8	1022	+	35732322	ENST00000486056.1	ENSG00000107175.12	alternative	CREB3
0.461838	1.3943	9.55283	0.00199642	0.155008	rDPI_32879	chr20	5922448	5922471	chr20:5922448..5922471,+	479	+	5922470	ENST00000488832.1	ENSG00000089199.10	alternative	CHGB
0.442865	0.895522	9.55057	0.00199887	0.155015	rDPI_1151	chr1	31930977	31930992	chr1:31930977..31930992,chr1:31930975..31931031,-;peak:chr1:31930981..31930982,-;peakCounts:23.4	75	-	31930981	ENST00000649841.1	ENSG00000184007.22	enhancer	PTP4A2
0.288471	5.06584	9.5388	0.00201173	0.155827	rDPI_12014	chr12	55974074	55974084	chr12:55974074..55974084,chr12:55974011..55974147,+;peak:chr12:55974079..55974080,+;peakCounts:6664.5	21180	+	55974079	ENST00000549505.5	ENSG00000111540.16	alternative	RAB5B
0.516675	1.59398	9.53128	0.00202	0.156282	rDPI_13700	chr13	20463447	20463486	chr13:20463447..20463486,-	687	-	20463447	ENST00000645525.1	ENSG00000165475.15	enhancer	CRYL1
-0.492301	1.3829	9.52664	0.0020251	0.156491	rDPI_19712	chr16	49281823	49281836	chr16:49281823..49281836,chr16:49281771..49281910,-;peak:chr16:49281830..49281831,-;peakCounts:154.7	521	-	49281830	ENST00000219197.11	ENSG00000102924.12	alternative	CBLN1
0.658359	4.60065	9.52277	0.00202938	0.156517	rDPI_17271	chr15	43517624	43517643	chr15:43517624..43517643,chr15:43517593..43517683,+;peak:chr15:43517628..43517629,+;peakCounts:2922.3	12622	+	43517628	ENST00000300231.6	ENSG00000166963.13	promoter	MAP1A
0.445769	1.46488	9.522	0.00203023	0.156517	rDPI_2927	chr1	147811347	147811358	chr1:147811347..147811358,chr1:147811270..147811427,-;peak:chr1:147811352..147811353,-;peakCounts:466.2	535	-	147811352	ENST00000621517.1	ENSG00000265107.3	enhancer	GJA5
-0.623004	1.84376	9.51623	0.00203662	0.156704	rDPI_43742	chr5	179345404	179345410	chr5:179345404..179345410,chr5:179345340..179345502,-;peak:chr5:179345404..179345405,-;peakCounts:1331.1	1563	-	179345404	ENST00000274609.5	ENSG00000087116.16	alternative	ADAMTS2
0.858679	2.77878	9.51549	0.00203745	0.156704	rDPI_43155	chr5	148452866	148452880	chr5:148452866..148452880,chr5:148452697..148453154,+;peak:chr5:148452874..148452875,+;peakCounts:1614.6	3192	+	148452874	ENST00000508176.1	ENSG00000145868.17	alternative	FBXO38
0.592974	1.09052	9.51058	0.00204291	0.156939	rDPI_35421	chr22	39989659	39989676	chr22:39989659..39989676,-	193	-	39989659	ENST00000569912.1	ENSG00000261202.1	not_classified	LOC114841040
0.425917	0.947353	9.50179	0.00205271	0.157462	rDPI_5972	chr10	35898780	35898795	chr10:35898780..35898795,chr10:35898764..35898885,-;peak:chr10:35898790..35898791,-;peakCounts:47.6	90	-	35898790	ENST00000442783.1	ENSG00000227313.1	not_classified	NA
-1.06258	3.11619	9.49975	0.002055	0.157462	rDPI_26029	chr19	36099416	36099423	chr19:36099416..36099423,chr19:36099366..36099479,+;peak:chr19:36099416..36099417,+;peakCounts:3518.1	4942	+	36099416	ENST00000680773.1	ENSG00000075702.19	enhancer	WDR62
0.670814	3.31844	9.498	0.00205696	0.157462	rDPI_19455	chr16	30064734	30064745	chr16:30064734..30064745,chr16:30064601..30064765,+;peak:chr16:30064744..30064745,+;peakCounts:1747.8	5479	+	30064744	ENST00000563987.5	ENSG00000149925.22	alternative	ALDOA
-0.443796	1.70303	9.48374	0.00207301	0.158325	rDPI_10508	chr11	119364305	119364313	chr11:119364305..119364313,chr11:119364291..119364426,+;peak:chr11:119364308..119364309,+;peakCounts:340.4	847	+	119364308	ENST00000668377.1	ENSG00000245248.8	alternative	NA
-0.643775	1.64109	9.48368	0.00207308	0.158325	rDPI_5708	chr10	18659398	18659404	chr10:18659398..18659404,chr10:18659292..18659562,+;peak:chr10:18659398..18659399,+;peakCounts:461.5	1203	+	18659398	ENST00000377275.4	ENSG00000165997.5	alternative	ARL5B
-0.453092	1.16513	9.47849	0.00207895	0.158463	rDPI_32003	chr2	215428261	215428288	chr2:215428261..215428288,chr2:215428179..215428343,-;peak:chr2:215428265..215428266,-;peakCounts:54	326	-	215428265	ENST00000496542.1	ENSG00000115414.21	enhancer	FN1
0.333358	5.26641	9.47611	0.00208165	0.158463	rDPI_29035	chr2	86563393	86563424	chr2:86563393..86563424,chr2:86563310..86563523,-;peak:chr2:86563408..86563409,-;peakCounts:4417	22183	-	86563408	ENST00000485465.1	ENSG00000115561.16	promoter	CHMP3
0.45886	5.52443	9.47566	0.00208216	0.158463	rDPI_54504	chrX	103585552	103585559	chrX:103585552..103585559,chrX:103585431..103585709,+;peak:chrX:103585558..103585559,+;peakCounts:17723.7	28169	+	103585558	ENST00000494801.5	ENSG00000133142.18	promoter	TCEAL4
0.880703	3.58767	9.46588	0.00209329	0.158862	rDPI_3908	chr1	172452905	172452910	chr1:172452905..172452910,chr1:172452726..172452991,+;peak:chr1:172452909..172452910,+;peakCounts:4906.8	5714	+	172452909	ENST00000367725.4	ENSG00000180999.11	promoter	C1orf105
0.382997	1.52178	9.46577	0.00209342	0.158862	rDPI_32680	chr20	325232	325241	chr20:325232..325241,chr20:325227..325313,-;peak:chr20:325237..325238,-;peakCounts:277.1	642	-	325237	ENST00000414676.6	ENSG00000225377.6	alternative	NRSN2-AS1
0.37238	5.21021	9.46105	0.0020988	0.158862	rDPI_6998	chr10	96750266	96750267	chr10:96750266..96750267,+	555797	+	96750266	ENST00000439189.1	ENSG00000236552.2	promoter	RPL13AP5
0.374298	1.85036	9.45412	0.00210675	0.158862	rDPI_2230	chr1	87331740	87331749	chr1:87331740..87331749,chr1:87331654..87331799,+;peak:chr1:87331744..87331745,+;peakCounts:895.5	1187	+	87331744	ENST00000489303.1	ENSG00000143013.13	alternative	LMO4
0.306518	2.00183	9.45385	0.00210706	0.158862	rDPI_53028	chr9	133348067	133348075	chr9:133348067..133348075,chr9:133348015..133348192,-;peak:chr9:133348070..133348071,-;peakCounts:962.4	1278	-	133348070	ENST00000471524.1	ENSG00000148297.16	alternative	MED22
0.361538	8.15829	9.4525	0.00210862	0.158862	rDPI_25822	chr19	32581188	32581198	chr19:32581188..32581198,chr19:32581045..32581320,+;peak:chr19:32581190..32581191,+;peakCounts:109660.5	178512	+	32581190	ENST00000590247.7	ENSG00000105185.12	promoter	PDCD5
0.371314	1.29465	9.44911	0.00211252	0.158862	rDPI_6551	chr10	75284327	75284336	chr10:75284327..75284336,chr10:75284304..75284359,-;peak:chr10:75284331..75284332,-;peakCounts:253.8	403	-	75284331	ENST00000445450.1	ENSG00000270087.5	alternative	NA
0.878619	3.91003	9.44891	0.00211275	0.158862	rDPI_19820	chr16	56589449	56589559	chr16:56589449..56589559,chr16:56589449..56589559,+	8519	+	56589528	ENST00000200691.5	ENSG00000087250.9	promoter	MT3
0.367967	3.41626	9.44823	0.00211353	0.158862	rDPI_27606	chr2	3379747	3379758	chr2:3379747..3379758,chr2:3379652..3379838,+;peak:chr2:3379753..3379754,+;peakCounts:2687.6	6863	+	3379753	ENST00000482645.1	ENSG00000171853.16	alternative	TRAPPC12
0.7903	2.58679	9.44605	0.00211605	0.158862	rDPI_39392	chr4	30720083	30720093	chr4:30720083..30720093,chr4:30720043..30720096,+;peak:chr4:30720086..30720087,+;peakCounts:1375.2	2563	+	30720086	ENST00000361762.3	ENSG00000169851.15	enhancer	PCDH7
-0.54468	1.5747	9.44299	0.00211957	0.158862	rDPI_22228	chr17	47222395	47222404	chr17:47222395..47222404,chr17:47222377..47222460,+;peak:chr17:47222398..47222399,+;peakCounts:217.4	640	+	47222398	ENST00000570671.1	ENSG00000198336.9	alternative	MYL4
0.431048	0.996916	9.44266	0.00211996	0.158862	rDPI_39484	chr4	41257437	41257457	chr4:41257437..41257457,chr4:41257423..41257591,+;peak:chr4:41257451..41257452,+;peakCounts:142.2	307	+	41257451	ENST00000472501.5	ENSG00000154277.13	enhancer	UCHL1
-0.369637	1.41559	9.44004	0.00212299	0.158862	rDPI_52477	chr9	121281846	121281857	chr9:121281846..121281857,chr9:121281790..121281895,+;peak:chr9:121281851..121281852,+;peakCounts:387.9	596	+	121281851	ENST00000483960.5	ENSG00000148180.21	enhancer	GSN
-0.624553	2.27395	9.43834	0.00212495	0.158862	rDPI_46668	chr7	1010053	1010149	chr7:1010053..1010149,chr7:1010053..1010149,-	1312	-	1010141	ENST00000362153.3	ENSG00000199023.3	alternative	MIR339
0.381478	3.1737	9.43678	0.00212676	0.158862	rDPI_36683	chr3	47803133	47803143	chr3:47803133..47803143,chr3:47803098..47803205,+;peak:chr3:47803138..47803139,+;peakCounts:2109.2	4709	+	47803138	ENST00000395745.6	ENSG00000132153.15	alternative	DHX30
0.50199	1.39787	9.43573	0.00212798	0.158862	rDPI_13108	chr12	110614111	110614116	chr12:110614111..110614116,chr12:110614020..110614204,+;peak:chr12:110614113..110614114,+;peakCounts:332.3	752	+	110614113	ENST00000481720.5	ENSG00000204852.17	alternative	TCTN1
-0.980427	3.45656	9.43438	0.00212955	0.158862	rDPI_32254	chr2	219426526	219426532	chr2:219426526..219426532,chr2:219425926..219426701,+;peak:chr2:219426531..219426532,+;peakCounts:758.9	4030	+	219426531	ENST00000623864.1	ENSG00000280323.1	alternative	NA
-0.321597	2.66567	9.43296	0.0021312	0.158862	rDPI_7891	chr11	925916	925925	chr11:925916..925925,chr11:925776..925987,+;peak:chr11:925921..925922,+;peakCounts:1294.3	3200	+	925921	ENST00000528815.5	ENSG00000183020.14	alternative	AP2A2
0.371159	1.66881	9.42885	0.00213598	0.159037	rDPI_12001	chr12	55829621	55829626	chr12:55829621..55829626,chr12:55829506..55829648,-;peak:chr12:55829623..55829624,-;peakCounts:376.9	762	-	55829623	ENST00000546957.2	ENSG00000135392.19	alternative	DNAJC14
0.434235	1.17134	9.42554	0.00213984	0.159074	rDPI_36518	chr3	42979334	42979351	chr3:42979334..42979351,chr3:42979311..42979378,+;peak:chr3:42979340..42979341,+;peakCounts:156.6	521	+	42979340	ENST00000492161.1	ENSG00000144649.9	promoter	GASK1A
0.386151	1.60278	9.42425	0.00214135	0.159074	rDPI_1896	chr1	63523568	63523576	chr1:63523568..63523576,chr1:63523442..63523628,+;peak:chr1:63523573..63523574,+;peakCounts:579.7	1044	+	63523573	ENST00000371088.5	ENSG00000203965.13	alternative	EFCAB7
0.480435	0.884015	9.42137	0.00214471	0.159142	rDPI_28748	chr2	68908718	68908744	chr2:68908718..68908744,+	95	+	68908722	ENST00000637675.1	ENSG00000283586.1	enhancer	NA
0.403909	1.56878	9.41213	0.00215555	0.159402	rDPI_34785	chr22	21001759	21001766	chr22:21001759..21001766,chr22:21001684..21001848,-;peak:chr22:21001762..21001763,-;peakCounts:407.1	746	-	21001762	ENST00000498406.1	ENSG00000184436.12	alternative	THAP7
0.413129	1.08471	9.4106	0.00215734	0.159402	rDPI_33093	chr20	25216618	25216628	chr20:25216618..25216628,chr20:25216404..25216703,+;peak:chr20:25216623..25216624,+;peakCounts:152.6	296	+	25216623	ENST00000471478.1	ENSG00000197586.13	alternative	ENTPD6
0.335847	1.92943	9.4106	0.00215735	0.159402	rDPI_54437	chrX	101617974	101617985	chrX:101617974..101617985,chrX:101617906..101618026,-;peak:chrX:101617981..101617982,-;peakCounts:395.4	1217	-	101617981	ENST00000495964.1	ENSG00000198960.11	alternative	ARMCX6
-0.50852	1.93093	9.41007	0.00215797	0.159402	rDPI_6234	chr10	65169559	65169595	chr10:65169559..65169595,-	694	-	65169590	ENST00000436904.1	ENSG00000227173.1	enhancer	NA
-0.508654	1.85433	9.39951	0.00217044	0.159919	rDPI_33958	chr20	63495056	63495075	chr20:63495056..63495075,chr20:63494807..63495106,-;peak:chr20:63495069..63495070,-;peakCounts:513	1078	-	63495069	ENST00000645586.1	ENSG00000101210.13	enhancer	EEF1A2
0.599262	4.64283	9.39569	0.00217496	0.159919	rDPI_37148	chr3	57890000	57890005	chr3:57890000..57890005,chr3:57889900..57890151,+;peak:chr3:57890002..57890003,+;peakCounts:12137.6	15598	+	57890002	ENST00000472546.5	ENSG00000163681.16	alternative	SLMAP
0.48969	3.37332	9.39469	0.00217615	0.159919	rDPI_49791	chr8	33599765	33599771	chr8:33599765..33599771,chr8:33599699..33599810,-;peak:chr8:33599767..33599768,-;peakCounts:3644.1	5254	-	33599767	ENST00000523956.1	ENSG00000133878.9	alternative	DUSP26
-0.407882	1.63262	9.39208	0.00217925	0.159919	rDPI_42291	chr5	91380401	91380412	chr5:91380401..91380412,chr5:91380325..91380435,+;peak:chr5:91380406..91380407,+;peakCounts:855.9	1080	+	91380406	ENST00000630823.2	ENSG00000281357.3	alternative	ARRDC3-AS1
-0.46221	4.14682	9.39183	0.00217955	0.159919	rDPI_10659	chr11	126355716	126355728	chr11:126355716..126355728,chr11:126355622..126355824,+;peak:chr11:126355721..126355722,+;peakCounts:5638.5	9786	+	126355721	ENST00000677721.1	ENSG00000110080.20	promoter	ST3GAL4
0.528289	3.42601	9.39173	0.00217967	0.159919	rDPI_38362	chr3	157089928	157089943	chr3:157089928..157089943,chr3:157089787..157090116,+;peak:chr3:157089933..157089934,+;peakCounts:2535.1	7190	+	157089933	ENST00000665438.1	ENSG00000241135.6	alternative	NA
0.420021	1.77784	9.38893	0.002183	0.159983	rDPI_44600	chr6	31777119	31777131	chr6:31777119..31777131,chr6:31777063..31777165,-;peak:chr6:31777125..31777126,-;peakCounts:336.6	1026	-	31777125	ENST00000467576.1	ENSG00000204396.11	promoter	VWA7
-0.626137	1.1215	9.38247	0.0021907	0.160368	rDPI_10379	chr11	117204439	117204449	chr11:117204439..117204449,chr11:117204213..117204573,+;peak:chr11:117204444..117204445,+;peakCounts:56.7	360	+	117204444	ENST00000624094.1	ENSG00000280143.1	alternative	NA
0.385569	3.01137	9.37997	0.00219369	0.160407	rDPI_1117	chr1	31297028	31297039	chr1:31297028..31297039,chr1:31296957..31297112,+;peak:chr1:31297033..31297034,+;peakCounts:2524.7	4347	+	31297033	ENST00000344147.10	ENSG00000121766.16	alternative	ZCCHC17
0.576569	1.47262	9.37735	0.00219683	0.160457	rDPI_41256	chr5	461945	461959	chr5:461945..461959,chr5:461885..461965,+;peak:chr5:461958..461959,+;peakCounts:288.9	600	+	461958	ENST00000511015.1	ENSG00000180104.16	not_classified	EXOC3
0.581851	1.97229	9.37235	0.00220283	0.160716	rDPI_17463	chr15	51924279	51924290	chr15:51924279..51924290,chr15:51924240..51924342,-;peak:chr15:51924284..51924285,-;peakCounts:1329.3	1984	-	51924284	ENST00000557871.1	ENSG00000259556.2	not_classified	NA
0.510429	1.66583	9.36951	0.00220625	0.160785	rDPI_49341	chr8	11347495	11347504	chr8:11347495..11347504,chr8:11347479..11347557,-;peak:chr8:11347500..11347501,-;peakCounts:309.6	722	-	11347500	ENST00000525867.1	ENSG00000255020.1	promoter	LOC100129129
0.729461	1.49288	9.3622	0.00221506	0.161248	rDPI_24056	chr18	50650187	50650193	chr18:50650187..50650193,chr18:50649982..50650232,+;peak:chr18:50650192..50650193,+;peakCounts:718.7	952	+	50650192	ENST00000587823.1	ENSG00000141639.12	alternative	MAPK4
0.403167	1.01029	9.35438	0.00222453	0.161757	rDPI_54027	chrX	48971814	48971819	chrX:48971814..48971819,chrX:48971792..48971876,-;peak:chrX:48971814..48971815,-;peakCounts:121.8	172	-	48971814	ENST00000218176.4	ENSG00000102057.10	alternative	KCND1
0.772629	2.44294	9.35201	0.00222741	0.161786	rDPI_18327	chr15	85580547	85580558	chr15:85580547..85580558,chr15:85580432..85580696,+;peak:chr15:85580552..85580553,+;peakCounts:1741.5	2327	+	85580552	ENST00000560340.5	ENSG00000170776.22	alternative	AKAP13
0.443084	1.18671	9.34741	0.002233	0.161864	rDPI_44716	chr6	32968461	32968468	chr6:32968461..32968468,chr6:32968449..32968551,-;peak:chr6:32968463..32968464,-;peakCounts:136.7	234	-	32968463	ENST00000464392.1	ENSG00000204257.15	alternative	HLA-DMA
-0.335802	1.88156	9.34706	0.00223344	0.161864	rDPI_28977	chr2	85354745	85354754	chr2:85354745..85354754,chr2:85354718..85354792,+;peak:chr2:85354748..85354749,+;peakCounts:708.3	1321	+	85354748	ENST00000446464.7	ENSG00000115459.18	alternative	ELMOD3
0.60485	1.78154	9.3441	0.00223704	0.161945	rDPI_49649	chr8	25479990	25480004	chr8:25479990..25480004,chr8:25479954..25480103,+;peak:chr8:25479995..25479996,+;peakCounts:713.7	1039	+	25479995	ENST00000521098.2	ENSG00000184661.14	alternative	CDCA2
-0.569583	2.35815	9.33427	0.00224908	0.162629	rDPI_43110	chr5	145936576	145936589	chr5:145936576..145936589,chr5:145936530..145936652,+;peak:chr5:145936584..145936585,+;peakCounts:1104.3	2196	+	145936584	ENST00000359120.9	ENSG00000156463.18	promoter	SH3RF2
0.378282	4.35136	9.33123	0.00225281	0.162629	rDPI_19173	chr16	19067642	19067656	chr16:19067642..19067656,chr16:19067583..19067727,+;peak:chr16:19067655..19067656,+;peakCounts:4946.4	12213	+	19067655	ENST00000566110.5	ENSG00000167186.11	promoter	COQ7
-0.687491	2.72091	9.3303	0.00225396	0.162629	rDPI_29207	chr2	98731120	98731138	chr2:98731120..98731138,chr2:98731060..98731174,-;peak:chr2:98731132..98731133,-;peakCounts:932.4	2604	-	98731132	ENST00000393487.6	ENSG00000071073.13	promoter	MGAT4A
0.349885	4.09201	9.32553	0.00225983	0.162872	rDPI_45747	chr6	110180426	110180429	chr6:110180426..110180429,chr6:110180364..110180443,+;peak:chr6:110180427..110180428,+;peakCounts:9017.1	10913	+	110180427	ENST00000307731.2	ENSG00000168438.15	promoter	CDC40
-0.483504	1.64385	9.31565	0.00227205	0.163411	rDPI_41108	chr4	185144887	185144898	chr4:185144887..185144898,chr4:185144758..185145272,+;peak:chr4:185144892..185144893,+;peakCounts:255.8	1047	+	185144892	ENST00000491736.1	ENSG00000151729.11	alternative	SLC25A4
-0.380569	1.30301	9.31544	0.0022723	0.163411	rDPI_3166	chr1	153543911	153543925	chr1:153543911..153543925,chr1:153543764..153543925,-;peak:chr1:153543923..153543924,-;peakCounts:113.7	229	-	153543923	ENST00000368715.5	ENSG00000196154.12	alternative	S100A4
-0.530373	1.3985	9.31016	0.00227887	0.163675	rDPI_18684	chr16	1072799	1072802	chr16:1072799..1072802,chr16:1072732..1072806,+;peak:chr16:1072801..1072802,+;peakCounts:470.7	648	+	1072801	ENST00000293897.5	ENSG00000162009.8	alternative	SSTR5
0.892599	1.83224	9.30845	0.00228099	0.163675	rDPI_44718	chr6	32968505	32968525	chr6:32968505..32968525,chr6:32968449..32968551,-;peak:chr6:32968512..32968513,-;peakCounts:290.7	748	-	32968512	ENST00000464392.1	ENSG00000204257.15	promoter	HLA-DMA
-0.532803	2.44936	9.29738	0.00229482	0.164294	rDPI_26847	chr19	48325391	48325402	chr19:48325391..48325402,chr19:48325268..48325611,+;peak:chr19:48325396..48325397,+;peakCounts:587.6	2874	+	48325396	ENST00000596315.5	ENSG00000142227.11	alternative	EMP3
-0.353637	1.9025	9.29571	0.00229691	0.164294	rDPI_40182	chr4	98261446	98261460	chr4:98261446..98261460,chr4:98261364..98261498,+;peak:chr4:98261451..98261452,+;peakCounts:364.9	1555	+	98261451	ENST00000508213.5	ENSG00000138698.15	alternative	RAP1GDS1
0.417733	0.964098	9.29551	0.00229717	0.164294	rDPI_47067	chr7	27113842	27113843	chr7:27113842..27113843,-	210	-	27113842	ENST00000522456.1	ENSG00000105997.22	promoter	HOXA3
0.391871	3.7043	9.2895	0.00230471	0.164506	rDPI_12938	chr12	109098181	109098198	chr12:109098181..109098198,chr12:109098130..109098276,+;peak:chr12:109098194..109098195,+;peakCounts:2557.8	8296	+	109098194	ENST00000446767.2	ENSG00000076248.11	promoter	UNG
-0.342404	5.9204	9.28913	0.00230517	0.164506	rDPI_8148	chr11	8964422	8964448	chr11:8964422..8964448,chr11:8964374..8964503,-;peak:chr11:8964426..8964427,-;peakCounts:6423.3	28919	-	8964426	ENST00000534025.6	ENSG00000175348.11	promoter	TMEM9B
-0.675366	3.19101	9.2795	0.00231732	0.165193	rDPI_40940	chr4	168480482	168480493	chr4:168480482..168480493,chr4:168480373..168480531,-;peak:chr4:168480487..168480488,-;peakCounts:1300.5	3836	-	168480487	ENST00000505890.5	ENSG00000181381.14	promoter	DDX60L
-0.655408	2.7618	9.27674	0.00232082	0.165262	rDPI_7830	chr11	615949	615950	chr11:615949..615950,chr11:615926..616004,-;peak:chr11:615949..615950,-;peakCounts:3685.5	4095	-	615949	ENST00000525445.6	ENSG00000185507.21	promoter	IRF7
-0.612794	2.62951	9.27393	0.00232439	0.165335	rDPI_47327	chr7	44139554	44139574	chr7:44139554..44139574,chr7:44139504..44139729,-;peak:chr7:44139561..44139562,-;peakCounts:759.6	1923	-	44139561	ENST00000446581.5	ENSG00000106631.8	alternative	MYL7
-0.403118	4.11184	9.27016	0.00232918	0.165496	rDPI_33232	chr20	34704313	34704319	chr20:34704313..34704319,chr20:34704276..34704375,+;peak:chr20:34704313..34704314,+;peakCounts:1006.8	8328	+	34704313	ENST00000374809.6	ENSG00000078804.13	alternative	TP53INP2
-0.350355	2.37103	9.26586	0.00233465	0.165596	rDPI_28450	chr2	55419851	55419868	chr2:55419851..55419868,chr2:55419792..55420035,-;peak:chr2:55419856..55419857,-;peakCounts:842.1	1982	-	55419856	ENST00000436346.7	ENSG00000115355.17	alternative	CCDC88A
-0.385607	2.69146	9.26377	0.00233731	0.165596	rDPI_36041	chr3	14540364	14540373	chr3:14540364..14540373,chr3:14540269..14540446,-;peak:chr3:14540368..14540369,-;peakCounts:1620.5	3117	-	14540368	ENST00000413414.1	ENSG00000144596.13	alternative	GRIP2
0.428541	2.1155	9.2618	0.00233982	0.165596	rDPI_52998	chr9	132878912	132878945	chr9:132878912..132878945,chr9:132878886..132878977,+;peak:chr9:132878924..132878925,+;peakCounts:322.2	1587	+	132878924	ENST00000350499.6	ENSG00000165698.16	promoter	SPACA9
0.450459	1.26384	9.2611	0.00234073	0.165596	rDPI_13267	chr12	114408269	114408275	chr12:114408269..114408275,+	461	+	114408274	ENST00000531024.1	ENSG00000255399.4	alternative	TBX5-AS1
-0.442448	1.35938	9.25607	0.00234716	0.165871	rDPI_34275	chr21	29193400	29193406	chr21:29193400..29193406,chr21:29193375..29193491,+;peak:chr21:29193400..29193401,+;peakCounts:372.9	591	+	29193400	ENST00000447125.5	ENSG00000215533.8	alternative	LINC00189
-0.520043	1.6089	9.25078	0.00235395	0.16615	rDPI_51397	chr9	32526212	32526219	chr9:32526212..32526219,chr9:32526176..32526262,-;peak:chr9:32526216..32526217,-;peakCounts:217.2	694	-	32526216	ENST00000679771.1	ENSG00000107201.11	alternative	DDX58
-0.923542	1.91473	9.24904	0.0023562	0.16615	rDPI_13414	chr12	121038975	121038981	chr12:121038975..121038981,-	1111	-	121038975	ENST00000680620.1	ENSG00000135114.13	promoter	OASL
0.382312	2.85385	9.24363	0.00236316	0.166462	rDPI_11462	chr12	31729020	31729028	chr12:31729020..31729028,chr12:31728991..31729129,-;peak:chr12:31729020..31729021,-;peakCounts:1434.6	2989	-	31729020	ENST00000281471.11	ENSG00000151743.11	promoter	AMN1
-0.377061	1.30029	9.2373	0.00237134	0.166858	rDPI_2016	chr1	72282815	72282826	chr1:72282815..72282826,chr1:72282676..72282851,-;peak:chr1:72282820..72282821,-;peakCounts:135	270	-	72282820	ENST00000357731.10	ENSG00000172260.15	alternative	NEGR1
-0.609112	2.08352	9.23509	0.00237421	0.16688	rDPI_50999	chr8	143986406	143986414	chr8:143986406..143986414,chr8:143986390..143986468,-;peak:chr8:143986406..143986407,-;peakCounts:181.3	1342	-	143986406	ENST00000527262.5	ENSG00000178685.14	alternative	PARP10
-0.508141	3.41265	9.23225	0.00237789	0.166959	rDPI_23043	chr17	75878574	75878592	chr17:75878574..75878592,chr17:75878539..75878639,-;peak:chr17:75878581..75878582,-;peakCounts:1544.4	4192	-	75878581	ENST00000254816.6	ENSG00000132481.7	promoter	TRIM47
-0.905492	4.74736	9.22331	0.00238953	0.167044	rDPI_32037	chr2	216633479	216633495	chr2:216633479..216633495,chr2:216633340..216633960,+;peak:chr2:216633494..216633495,+;peakCounts:10241	21590	+	216633494	ENST00000490362.1	ENSG00000115457.10	alternative	IGFBP2
-0.839468	2.31423	9.22312	0.00238978	0.167044	rDPI_54862	chrX	136206437	136206451	chrX:136206437..136206451,chrX:136206401..136206581,+;peak:chrX:136206439..136206440,+;peakCounts:669.6	1725	+	136206439	ENST00000628568.1	ENSG00000022267.19	alternative	FHL1
0.489875	1.43616	9.22283	0.00239016	0.167044	rDPI_40597	chr4	139280197	139280205	chr4:139280197..139280205,chr4:139280160..139280269,-;peak:chr4:139280201..139280202,-;peakCounts:240.8	552	-	139280201	ENST00000398955.2	ENSG00000137463.5	alternative	MGARP
0.460624	1.4886	9.22193	0.00239133	0.167044	rDPI_29420	chr2	113235480	113235517	chr2:113235480..113235517,-	528	-	113235497	ENST00000465084.1	ENSG00000125618.18	promoter	PAX8
0.676084	7.56051	9.2215	0.00239189	0.167044	rDPI_32057	chr2	216695547	216695548	chr2:216695547..216695548,chr2:216695483..216695554,-;peak:chr2:216695547..216695548,-;peakCounts:133304.4	148116	-	216695547	ENST00000233813.5	ENSG00000115461.5	promoter	IGFBP5
0.654742	2.28381	9.21684	0.00239798	0.16729	rDPI_21420	chr17	28370325	28370330	chr17:28370325..28370330,chr17:28370224..28370425,-;peak:chr17:28370327..28370328,-;peakCounts:910.7	1532	-	28370327	ENST00000226218.9	ENSG00000109072.14	alternative	VTN
0.279929	4.7424	9.21416	0.00240151	0.167357	rDPI_4140	chr1	186375240	186375268	chr1:186375240..186375268,chr1:186375083..186375377,-;peak:chr1:186375254..186375255,-;peakCounts:3408.4	15932	-	186375254	ENST00000367478.9	ENSG00000047410.14	promoter	TPR
-0.592804	0.984835	9.21137	0.00240517	0.167434	rDPI_34112	chr21	8399996	8400003	chr21:8399996..8400003,chr21:8399926..8400025,+;peak:chr21:8400001..8400002,+;peakCounts:143.1	293	+	8400001	ENST00000613359.1	ENSG00000275215.1	alternative	RNA5-8SN3
0.426947	1.77242	9.20819	0.00240935	0.167546	rDPI_17301	chr15	44195266	44195276	chr15:44195266..44195276,chr15:44195182..44195325,-;peak:chr15:44195271..44195272,-;peakCounts:633.6	1013	-	44195271	ENST00000417257.6	ENSG00000171877.21	promoter	FRMD5
0.530638	2.34124	9.20018	0.00241991	0.168043	rDPI_2186	chr1	85201706	85201712	chr1:85201706..85201712,chr1:85201589..85201759,-;peak:chr1:85201709..85201710,-;peakCounts:1647.7	3194	-	85201709	ENST00000341460.6	ENSG00000097096.9	alternative	SYDE2
0.325752	5.61149	9.19887	0.00242165	0.168043	rDPI_52820	chr9	128771916	128771935	chr9:128771916..128771935,chr9:128771834..128771966,-;peak:chr9:128771926..128771927,-;peakCounts:7895.7	24798	-	128771926	ENST00000291900.7	ENSG00000160445.11	promoter	ZER1
0.365205	1.49692	9.19624	0.00242513	0.168106	rDPI_37833	chr3	125595438	125595455	chr3:125595438..125595455,chr3:125595213..125595605,-;peak:chr3:125595443..125595444,-;peakCounts:273.7	683	-	125595443	ENST00000296220.6	ENSG00000144909.8	alternative	OSBPL11
-0.462241	4.92572	9.19204	0.00243069	0.168233	rDPI_6019	chr10	44959796	44959809	chr10:44959796..44959809,chr10:44959703..44959870,+;peak:chr10:44959803..44959804,+;peakCounts:8167.5	20847	+	44959803	ENST00000340258.10	ENSG00000107551.21	promoter	RASSF4
0.444528	2.81865	9.19097	0.00243212	0.168233	rDPI_38148	chr3	139539624	139539642	chr3:139539624..139539642,chr3:139539505..139539758,-;peak:chr3:139539636..139539637,-;peakCounts:896.7	2645	-	139539636	ENST00000619087.4	ENSG00000114115.10	alternative	RBP1
-1.03832	6.59076	9.18783	0.0024363	0.168324	rDPI_53366	chrM	5349	5355	chrM:5349..5355,chrM:5245..5581,+;peak:chrM:5354..5355,+;peakCounts:35576.6	43147	+	5354	ENST00000387382.1	ENSG00000210117.1	alternative	NA
-0.524649	2.8896	9.18611	0.00243858	0.168324	rDPI_35041	chr22	30607279	30607309	chr22:30607279..30607309,chr22:30607056..30607313,+;peak:chr22:30607284..30607285,+;peakCounts:786.1	3644	+	30607284	ENST00000407817.3	ENSG00000185339.9	alternative	TCN2
0.67808	1.89604	9.17598	0.00245212	0.169079	rDPI_49650	chr8	25480064	25480082	chr8:25480064..25480082,chr8:25479954..25480103,+;peak:chr8:25480076..25480077,+;peakCounts:563.7	1621	+	25480076	ENST00000521098.2	ENSG00000184661.14	enhancer	CDCA2
-0.786129	1.88977	9.17335	0.00245565	0.169136	rDPI_4152	chr1	192575773	192575776	chr1:192575773..192575776,+	1475	+	192575773	ENST00000462589.1	ENSG00000090104.12	promoter	RGS1
0.439849	4.76338	9.17151	0.00245812	0.169136	rDPI_27663	chr2	9423517	9423533	chr2:9423517..9423533,chr2:9423334..9423634,-;peak:chr2:9423528..9423529,-;peakCounts:3523.3	12887	-	9423528	ENST00000355346.9	ENSG00000119185.13	alternative	ITGB1BP1
0.439476	2.09554	9.16477	0.00246718	0.169449	rDPI_25135	chr19	11421198	11421219	chr19:11421198..11421219,-	1508	-	11421217	ENST00000393423.7	ENSG00000205517.13	enhancer	RGL3
-0.791806	1.5685	9.16225	0.00247059	0.169449	rDPI_50199	chr8	71844409	71844418	chr8:71844409..71844418,chr8:71844408..71844497,-;peak:chr8:71844410..71844411,-;peakCounts:480.6	926	-	71844410	ENST00000325509.5	ENSG00000178860.9	alternative	MSC
-0.339983	2.02658	9.16171	0.00247131	0.169449	rDPI_44207	chr6	18155441	18155447	chr6:18155441..18155447,chr6:18155385..18155518,+;peak:chr6:18155442..18155443,+;peakCounts:557.7	1503	+	18155442	ENST00000449850.2	ENSG00000165097.16	alternative	KDM1B
0.331892	2.19075	9.15793	0.00247643	0.169449	rDPI_49352	chr8	11769713	11769724	chr8:11769713..11769724,chr8:11769632..11769883,+;peak:chr8:11769718..11769719,+;peakCounts:1602.9	2065	+	11769718	ENST00000284503.7	ENSG00000154328.16	alternative	NEIL2
-1.20258	4.7378	9.15713	0.00247751	0.169449	rDPI_15152	chr14	23424053	23424085	chr14:23424053..23424085,chr14:23423908..23424158,-;peak:chr14:23424079..23424080,-;peakCounts:1911.9	22724	-	23424079	ENST00000401172.1	ENSG00000215991.1	enhancer	MIR208B
0.44817	2.72993	9.15659	0.00247824	0.169449	rDPI_2187	chr1	85201713	85201719	chr1:85201713..85201719,chr1:85201589..85201759,-;peak:chr1:85201716..85201717,-;peakCounts:2265.7	3709	-	85201716	ENST00000341460.6	ENSG00000097096.9	alternative	SYDE2
0.306855	4.19708	9.15114	0.00248563	0.169724	rDPI_44576	chr6	31666071	31666075	chr6:31666071..31666075,chr6:31666040..31666189,+;peak:chr6:31666071..31666072,+;peakCounts:3606.8	11542	+	31666071	ENST00000375882.7	ENSG00000204435.15	alternative	CSNK2B
-0.492054	1.63786	9.14938	0.00248802	0.169724	rDPI_27265	chr19	54662982	54662989	chr19:54662982..54662989,chr19:54662904..54663025,+;peak:chr19:54662985..54662986,+;peakCounts:480.6	780	+	54662985	ENST00000430952.6	ENSG00000186818.12	alternative	LILRB4
-0.387502	4.07483	9.14789	0.00249006	0.169724	rDPI_34655	chr22	17159264	17159269	chr22:17159264..17159269,chr22:17159153..17159295,-;peak:chr22:17159265..17159266,-;peakCounts:3444.5	8665	-	17159265	ENST00000336737.8	ENSG00000069998.12	alternative	HDHD5
0.62106	4.4674	9.13283	0.00251064	0.17084	rDPI_51714	chr9	63334394	63334403	chr9:63334394..63334403,chr9:63334392..63334451,-;peak:chr9:63334394..63334395,-;peakCounts:5220.9	11173	-	63334394	ENST00000412626.2	ENSG00000186466.5	not_classified	NA
0.347194	4.19813	9.13208	0.00251166	0.17084	rDPI_9742	chr11	72041092	72041128	chr11:72041092..72041128,chr11:72041005..72041143,-;peak:chr11:72041109..72041110,-;peakCounts:2261.7	8914	-	72041109	ENST00000536119.5	ENSG00000137497.18	promoter	NUMA1
-0.379078	1.16011	9.13006	0.00251443	0.17085	rDPI_40584	chr4	138242344	138242351	chr4:138242344..138242351,-	280	-	138242349	ENST00000280612.9	ENSG00000151012.13	promoter	SLC7A11
0.359992	3.16312	9.12472	0.00252179	0.171048	rDPI_49709	chr8	27772624	27772631	chr8:27772624..27772631,chr8:27772545..27772676,-;peak:chr8:27772627..27772628,-;peakCounts:2643.7	3961	-	27772627	ENST00000524084.5	ENSG00000147419.19	alternative	CCDC25
0.307107	5.22462	9.12414	0.00252258	0.171048	rDPI_34028	chr20	63981119	63981142	chr20:63981119..63981142,chr20:63981071..63981244,+;peak:chr20:63981132..63981133,+;peakCounts:7928.1	24675	+	63981132	ENST00000266079.5	ENSG00000101161.8	promoter	PRPF6
0.353946	6.24982	9.12005	0.00252823	0.171254	rDPI_15306	chr14	24136185	24136207	chr14:24136185..24136207,chr14:24136120..24136300,+;peak:chr14:24136189..24136190,+;peakCounts:7626.6	42174	+	24136189	ENST00000206451.11	ENSG00000092010.15	promoter	PSME1
-0.350059	1.88399	9.1102	0.00254188	0.172	rDPI_41438	chr5	31193686	31193703	chr5:31193686..31193703,chr5:31193683..31193815,+;peak:chr5:31193686..31193687,+;peakCounts:378.9	1023	+	31193686	ENST00000265071.3	ENSG00000113361.13	promoter	CDH6
-1.07568	3.34363	9.10614	0.00254753	0.172204	rDPI_15052	chr14	23414084	23414105	chr14:23414084..23414105,chr14:23414011..23414110,-;peak:chr14:23414098..23414099,-;peakCounts:1215.9	5720	-	23414098	ENST00000401172.1	ENSG00000215991.1	enhancer	MIR208B
0.411171	4.12564	9.10366	0.00255098	0.172258	rDPI_38311	chr3	152269540	152269564	chr3:152269540..152269564,chr3:152269492..152269642,-;peak:chr3:152269546..152269547,-;peakCounts:2312.1	8277	-	152269546	ENST00000608395.1	ENSG00000229619.4	promoter	MBNL1-AS1
-0.773268	2.29817	9.09667	0.00256075	0.17274	rDPI_33721	chr20	50267470	50267506	chr20:50267470..50267506,chr20:50267445..50267547,+;peak:chr20:50267478..50267479,+;peakCounts:265.5	1840	+	50267478	ENST00000425497.6	ENSG00000224397.7	promoter	PELATON
-0.771215	5.76096	9.08811	0.00257277	0.172977	rDPI_11196	chr12	12785659	12785661	chr12:12785659..12785661,+	41376	+	12785659	ENST00000356591.5	ENSG00000178878.13	promoter	APOLD1
-0.376426	1.37594	9.08664	0.00257484	0.172977	rDPI_13513	chr12	123271665	123271682	chr12:123271665..123271682,chr12:123271571..123271729,-;peak:chr12:123271673..123271674,-;peakCounts:198.9	584	-	123271673	ENST00000261692.7	ENSG00000111328.7	enhancer	CDK2AP1
0.377476	3.13107	9.08654	0.00257497	0.172977	rDPI_52169	chr9	101398599	101398601	chr9:101398599..101398601,chr9:101398557..101398670,-;peak:chr9:101398599..101398600,-;peakCounts:2866.5	4153	-	101398599	ENST00000374865.5	ENSG00000136897.8	alternative	MRPL50
-0.76892	1.20076	9.08486	0.00257734	0.172977	rDPI_50568	chr8	103298795	103298807	chr8:103298795..103298807,chr8:103298689..103298858,-;peak:chr8:103298800..103298801,-;peakCounts:246.6	535	-	103298800	ENST00000522856.1	ENSG00000247081.8	promoter	LOC105369147
0.417218	2.69453	9.08474	0.00257751	0.172977	rDPI_44670	chr6	32177072	32177083	chr6:32177072..32177083,chr6:32176996..32177151,-;peak:chr6:32177077..32177078,-;peakCounts:1990.8	2926	-	32177077	ENST00000395499.5	ENSG00000204310.13	alternative	AGPAT1
-0.479245	2.52457	9.08182	0.00258164	0.173076	rDPI_4485	chr1	204828690	204828697	chr1:204828690..204828697,chr1:204828619..204828756,+;peak:chr1:204828693..204828694,+;peakCounts:1284.2	2467	+	204828693	ENST00000680427.1	ENSG00000163531.16	alternative	NFASC
0.493413	9.59753	9.07675	0.0025888	0.173378	rDPI_7443	chr10	113663804	113664189	chr10:113663804..113664189,chr10:113663804..113664189,-	467816	-	113664041	ENST00000359988.4	ENSG00000197893.14	promoter	NRAP
0.331259	1.75328	9.07467	0.00259174	0.173397	rDPI_39572	chr4	48906809	48906815	chr4:48906809..48906815,chr4:48906674..48906836,-;peak:chr4:48906811..48906812,-;peakCounts:303.8	834	-	48906811	ENST00000514576.5	ENSG00000145247.12	alternative	OCIAD2
-0.433373	1.27118	9.07264	0.00259462	0.173412	rDPI_23730	chr18	23135487	23135488	chr18:23135487..23135488,chr18:23135392..23135531,+;peak:chr18:23135487..23135488,+;peakCounts:797.4	886	+	23135487	ENST00000580153.5	ENSG00000134508.12	promoter	CABLES1
1.12536	2.48911	9.06917	0.00259955	0.173564	rDPI_20200	chr16	71358723	71358727	chr16:71358723..71358727,+	2206	+	71358723	ENST00000302628.9	ENSG00000172137.19	promoter	CALB2
0.367054	2.80297	9.06698	0.00260266	0.173594	rDPI_10032	chr11	93741658	93741667	chr11:93741658..93741667,chr11:93741561..93741733,+;peak:chr11:93741665..93741666,+;peakCounts:909.3	4001	+	93741665	ENST00000528099.5	ENSG00000182919.15	alternative	C11orf54
-0.519622	1.06435	9.06474	0.00260585	0.17363	rDPI_53903	chrX	45771247	45771253	chrX:45771247..45771253,-	298	-	45771247	ENST00000602461.1	ENSG00000270069.1	enhancer	NA
0.426396	1.54278	9.06287	0.00260852	0.17363	rDPI_50583	chr8	104588925	104588936	chr8:104588925..104588936,chr8:104588900..104589060,-;peak:chr8:104588930..104588931,-;peakCounts:333.1	579	-	104588930	ENST00000519675.1	ENSG00000147650.12	alternative	LRP12
0.364864	1.7477	9.05803	0.00261543	0.173913	rDPI_1199	chr1	32539453	32539474	chr1:32539453..32539474,chr1:32539404..32539499,+;peak:chr1:32539465..32539466,+;peakCounts:306.9	1020	+	32539465	ENST00000316459.4	ENSG00000160062.15	alternative	ZBTB8A
-0.448913	4.47074	9.05582	0.00261861	0.173947	rDPI_50930	chr8	143578321	143578335	chr8:143578321..143578335,-	11107	-	143578330	ENST00000449291.7	ENSG00000147813.16	promoter	NAPRT
0.434776	2.87495	9.05283	0.00262288	0.174054	rDPI_20998	chr17	7479526	7479535	chr17:7479526..7479535,chr17:7479360..7479683,-;peak:chr17:7479531..7479532,-;peakCounts:775.4	3383	-	7479531	ENST00000380599.9	ENSG00000174282.12	alternative	ZBTB4
0.595622	1.05371	9.04763	0.00263036	0.174373	rDPI_47745	chr7	76510580	76510586	chr7:76510580..76510586,chr7:76510516..76510587,+;peak:chr7:76510585..76510586,+;peakCounts:91.8	173	+	76510585	ENST00000334348.8	ENSG00000243566.7	alternative	UPK3B
0.379167	1.27576	9.0443	0.00263515	0.174472	rDPI_22418	chr17	50560710	50560721	chr17:50560710..50560721,chr17:50560679..50560781,+;peak:chr17:50560715..50560716,+;peakCounts:211.5	308	+	50560715	ENST00000359106.10	ENSG00000006283.18	promoter	CACNA1G
0.413528	2.86716	9.04268	0.00263749	0.174472	rDPI_1380	chr1	38991308	38991310	chr1:38991308..38991310,chr1:38991223..38991427,+;peak:chr1:38991309..38991310,+;peakCounts:2851.3	4253	+	38991309	ENST00000372984.8	ENSG00000174574.16	alternative	AKIRIN1
0.459417	5.0541	9.0402	0.00264107	0.174472	rDPI_39708	chr4	64409356	64409367	chr4:64409356..64409367,chr4:64409122..64409595,-;peak:chr4:64409361..64409362,-;peakCounts:9093.9	18294	-	64409361	ENST00000509536.1	ENSG00000205678.8	alternative	TECRL
0.426169	5.07952	9.03908	0.00264268	0.174472	rDPI_21710	chr17	38752738	38752750	chr17:38752738..38752750,chr17:38752708..38752832,+;peak:chr17:38752741..38752742,+;peakCounts:6830.4	20917	+	38752741	ENST00000619426.5	ENSG00000277791.5	alternative	PSMB3
-0.306408	4.61617	9.03733	0.00264521	0.174472	rDPI_31689	chr2	197453524	197453535	chr2:197453524..197453535,chr2:197453385..197453609,+;peak:chr2:197453529..197453530,+;peakCounts:3848.7	14619	+	197453529	ENST00000409398.5	ENSG00000115520.8	alternative	COQ10B
0.499495	1.0104	9.03376	0.00265039	0.174637	rDPI_44408	chr6	29696974	29696976	chr6:29696974..29696976,chr6:29696956..29697015,+;peak:chr6:29696975..29696976,+;peakCounts:139.5	170	+	29696975	ENST00000376861.5	ENSG00000204642.14	enhancer	HLA-F
-0.683699	2.18964	9.02853	0.00265798	0.174905	rDPI_38522	chr3	171688726	171688754	chr3:171688726..171688754,chr3:171688685..171688811,-;peak:chr3:171688738..171688739,-;peakCounts:206.1	1315	-	171688738	ENST00000471075.1	ENSG00000075651.16	enhancer	PLD1
0.416619	4.25216	9.02578	0.00266199	0.174905	rDPI_13563	chr12	123972826	123972835	chr12:123972826..123972835,chr12:123972538..123972943,-;peak:chr12:123972831..123972832,-;peakCounts:7319.7	10242	-	123972831	ENST00000238156.8	ENSG00000119242.9	promoter	CCDC92
-0.719447	2.89414	9.02543	0.0026625	0.174905	rDPI_35837	chr3	4979437	4979442	chr3:4979437..4979442,chr3:4979396..4979703,+;peak:chr3:4979437..4979438,+;peakCounts:2242.8	3444	+	4979437	ENST00000467610.1	ENSG00000134107.5	alternative	BHLHE40
-0.985327	2.2943	9.02125	0.00266859	0.175103	rDPI_21597	chr17	34319435	34319438	chr17:34319435..34319438,+	2148	+	34319435	ENST00000394620.2	ENSG00000108700.5	promoter	CCL8
-0.504295	3.04392	9.01968	0.00267088	0.175103	rDPI_37824	chr3	125056265	125056357	chr3:125056265..125056357,chr3:125056265..125056357,-	3521	-	125056309	ENST00000311127.9	ENSG00000173706.14	enhancer	HEG1
0.478821	1.4346	9.00831	0.00268755	0.176008	rDPI_7192	chr10	101967128	101967140	chr10:101967128..101967140,chr10:101967087..101967272,-;peak:chr10:101967133..101967134,-;peakCounts:174.3	465	-	101967133	ENST00000410498.1	ENSG00000222430.1	alternative	NA
0.489494	2.45789	9.00659	0.00269007	0.176008	rDPI_29563	chr2	130181688	130181706	chr2:130181688..130181706,chr2:130181654..130181802,+;peak:chr2:130181700..130181701,+;peakCounts:1458.9	3554	+	130181700	ENST00000425361.5	ENSG00000152082.15	alternative	MZT2B
-0.468366	1.1773	8.99901	0.00270126	0.176385	rDPI_32477	chr2	233854524	233854541	chr2:233854524..233854541,chr2:233854493..233854561,-;peak:chr2:233854535..233854536,-;peakCounts:85.5	257	-	233854535	ENST00000411486.7	ENSG00000123485.12	promoter	HJURP
0.412403	1.09124	8.99856	0.00270193	0.176385	rDPI_10888	chr12	4626652	4626657	chr12:4626652..4626657,chr12:4626501..4626840,-;peak:chr12:4626654..4626655,-;peakCounts:40.2	189	-	4626654	ENST00000537929.1	ENSG00000256799.1	alternative	NA
-0.442485	6.65911	8.9972	0.00270393	0.176385	rDPI_54649	chrX	119468440	119468451	chrX:119468440..119468451,chrX:119468361..119468507,+;peak:chrX:119468445..119468446,+;peakCounts:14005.8	57719	+	119468445	ENST00000317881.9	ENSG00000005022.6	promoter	SLC25A5
-0.516202	0.90837	8.99116	0.00271289	0.176546	rDPI_9482	chr11	65900545	65900575	chr11:65900545..65900575,-	263	-	65900545	ENST00000534222.1	ENSG00000175592.9	alternative	FOSL1
0.407843	1.42644	8.99041	0.002714	0.176546	rDPI_46336	chr6	150827626	150827642	chr6:150827626..150827642,+	1124	+	150827641	ENST00000398028.3	ENSG00000213089.4	promoter	NA
0.378196	1.41653	8.98914	0.00271589	0.176546	rDPI_50557	chr8	102653961	102653983	chr8:102653961..102653983,-	546	-	102653964	ENST00000395884.3	ENSG00000155090.15	enhancer	KLF10
-0.443963	1.87806	8.98635	0.00272004	0.176546	rDPI_37286	chr3	69386085	69386099	chr3:69386085..69386099,chr3:69386001..69386424,-;peak:chr3:69386088..69386089,-;peakCounts:593.1	1136	-	69386088	ENST00000398540.8	ENSG00000114541.15	promoter	FRMD4B
-0.340292	1.85285	8.98405	0.00272346	0.176546	rDPI_8122	chr11	7513937	7513952	chr11:7513937..7513952,chr11:7513929..7514052,+;peak:chr11:7513941..7513942,+;peakCounts:605.9	1208	+	7513941	ENST00000299492.9	ENSG00000166387.13	promoter	PPFIBP2
0.407722	4.06914	8.98289	0.00272519	0.176546	rDPI_16631	chr14	103562985	103562990	chr14:103562985..103562990,chr14:103562901..103563120,+;peak:chr14:103562987..103562988,+;peakCounts:6171.4	8984	+	103562987	ENST00000556253.6	ENSG00000256053.9	alternative	COA8
0.414208	7.07434	8.98271	0.00272546	0.176546	rDPI_19606	chr16	31180136	31180214	chr16:31180136..31180214,chr16:31180136..31180214,+	87484	+	31180139	ENST00000566605.5	ENSG00000089280.19	promoter	FUS
-0.414176	2.03828	8.98099	0.00272803	0.176546	rDPI_22362	chr17	50151083	50151101	chr17:50151083..50151101,chr17:50150973..50151170,-;peak:chr17:50151088..50151089,-;peakCounts:523.4	1458	-	50151088	ENST00000612501.2	ENSG00000108819.11	alternative	PPP1R9B
-0.581368	2.38372	8.97866	0.00273151	0.176596	rDPI_25971	chr19	35654600	35654617	chr19:35654600..35654617,chr19:35654568..35654660,+;peak:chr19:35654611..35654612,+;peakCounts:643.5	1265	+	35654611	ENST00000590618.1	ENSG00000126267.11	alternative	COX6B1
0.575841	7.80799	8.97541	0.00273637	0.176728	rDPI_23485	chr18	3219866	3219881	chr18:3219866..3219881,chr18:3219650..3220211,-;peak:chr18:3219866..3219867,-;peakCounts:50381.4	143766	-	3219866	ENST00000261606.11	ENSG00000101605.13	promoter	MYOM1
0.370715	2.20471	8.9731	0.00273983	0.176728	rDPI_54139	chrX	54808366	54808369	chrX:54808366..54808369,chrX:54808301..54808430,+;peak:chrX:54808366..54808367,+;peakCounts:898.3	2137	+	54808366	ENST00000375058.5	ENSG00000102316.17	alternative	MAGED2
-0.747918	4.45577	8.96922	0.00274565	0.176728	rDPI_25899	chr19	35030464	35030483	chr19:35030464..35030483,chr19:35030407..35030608,+;peak:chr19:35030470..35030471,+;peakCounts:6838.2	13227	+	35030470	ENST00000262631.11	ENSG00000105711.13	alternative	SCN1B
0.674437	2.94295	8.96496	0.00275206	0.176728	rDPI_18326	chr15	85580524	85580539	chr15:85580524..85580539,chr15:85580432..85580696,+;peak:chr15:85580524..85580525,+;peakCounts:1447.5	3370	+	85580524	ENST00000560340.5	ENSG00000170776.22	enhancer	AKAP13
0.374171	2.99545	8.9645	0.00275276	0.176728	rDPI_17704	chr15	63277599	63277609	chr15:63277599..63277609,chr15:63277519..63277639,+;peak:chr15:63277608..63277609,+;peakCounts:1636.2	3906	+	63277608	ENST00000261879.10	ENSG00000138613.14	promoter	APH1B
0.350701	2.99078	8.96415	0.00275329	0.176728	rDPI_12423	chr12	69738860	69738870	chr12:69738860..69738870,chr12:69738794..69738969,+;peak:chr12:69738860..69738861,+;peakCounts:2243.2	4493	+	69738860	ENST00000247833.12	ENSG00000127328.22	alternative	RAB3IP
-0.850425	7.19597	8.96247	0.00275583	0.176728	rDPI_44914	chr6	36678713	36678715	chr6:36678713..36678715,chr6:36678652..36678823,+;peak:chr6:36678714..36678715,+;peakCounts:95950.8	110056	+	36678714	ENST00000244741.10	ENSG00000124762.14	promoter	CDKN1A
-0.549531	1.76891	8.9613	0.00275758	0.176728	rDPI_41896	chr5	69167143	69167159	chr5:69167143..69167159,chr5:69167097..69167216,+;peak:chr5:69167150..69167151,+;peakCounts:497.7	1001	+	69167150	ENST00000256442.10	ENSG00000134057.15	promoter	CCNB1
-0.940114	2.47104	8.96109	0.0027579	0.176728	rDPI_25447	chr19	14776831	14776870	chr19:14776831..14776870,-	2445	-	14776841	ENST00000392965.7	ENSG00000127507.18	promoter	ADGRE2
0.752065	1.63274	8.95649	0.00276486	0.176865	rDPI_40819	chr4	153789067	153789070	chr4:153789067..153789070,chr4:153789066..153789128,-;peak:chr4:153789067..153789068,-;peakCounts:761.9	969	-	153789067	ENST00000274063.5	ENSG00000145423.5	alternative	SFRP2
0.41671	1.91649	8.95609	0.00276547	0.176865	rDPI_21212	chr17	15999648	15999653	chr17:15999648..15999653,chr17:15999522..15999736,-;peak:chr17:15999651..15999652,-;peakCounts:536.2	1077	-	15999651	ENST00000490395.5	ENSG00000214941.8	alternative	ZSWIM7
-0.955235	2.17727	8.94826	0.00277734	0.177451	rDPI_47274	chr7	41703070	41703077	chr7:41703070..41703077,chr7:41703050..41703140,-;peak:chr7:41703070..41703071,-;peakCounts:667.8	1842	-	41703070	ENST00000242208.5	ENSG00000122641.11	promoter	INHBA
-0.366487	1.66814	8.94521	0.00278198	0.177573	rDPI_36808	chr3	49104520	49104533	chr3:49104520..49104533,chr3:49104423..49104551,-;peak:chr3:49104529..49104530,-;peakCounts:277	893	-	49104529	ENST00000464962.6	ENSG00000172053.18	alternative	QARS1
-0.81912	1.55683	8.94288	0.00278553	0.177626	rDPI_16775	chr14	106117164	106117165	chr14:106117164..106117165,-	624	-	106117164	ENST00000390601.3	ENSG00000211941.3	promoter	IGHV3-11
-0.480599	1.15244	8.93678	0.00279485	0.178047	rDPI_14107	chr13	45338762	45338770	chr13:45338762..45338770,chr13:45338711..45338782,-;peak:chr13:45338765..45338766,-;peakCounts:127	399	-	45338765	ENST00000530245.5	ENSG00000133112.17	enhancer	TPT1
0.445272	2.45709	8.92808	0.00280819	0.178612	rDPI_21213	chr17	15999659	15999666	chr17:15999659..15999666,chr17:15999522..15999736,-;peak:chr17:15999661..15999662,-;peakCounts:774.2	2063	-	15999661	ENST00000486706.6	ENSG00000214941.8	alternative	ZSWIM7
-0.598775	1.49584	8.92743	0.00280919	0.178612	rDPI_42009	chr5	76819025	76819041	chr5:76819025..76819041,chr5:76818963..76819063,+;peak:chr5:76819030..76819031,+;peakCounts:422.1	726	+	76819030	ENST00000296677.5	ENSG00000164251.5	promoter	F2RL1
0.313872	3.23181	8.92311	0.00281585	0.178861	rDPI_32198	chr2	219387791	219387801	chr2:219387791..219387801,chr2:219387764..219387992,-;peak:chr2:219387796..219387797,-;peakCounts:636.8	3765	-	219387796	ENST00000520694.6	ENSG00000123992.20	alternative	DNPEP
-0.710488	2.88053	8.91594	0.00282692	0.17939	rDPI_6512	chr10	73911127	73911135	chr10:73911127..73911135,chr10:73911078..73911156,+;peak:chr10:73911132..73911133,+;peakCounts:2351.7	5475	+	73911132	ENST00000372764.4	ENSG00000122861.16	promoter	PLAU
-0.535201	2.80356	8.90773	0.00283966	0.179986	rDPI_35031	chr22	30425750	30425757	chr22:30425750..30425757,chr22:30425712..30425877,+;peak:chr22:30425752..30425753,+;peakCounts:1450.7	3278	+	30425752	ENST00000266263.10	ENSG00000242114.6	alternative	MTFP1
0.813949	4.30704	8.90634	0.00284182	0.179986	rDPI_6478	chr10	73651034	73651041	chr10:73651034..73651041,chr10:73650939..73651120,-;peak:chr10:73651040..73651041,-;peakCounts:5397.3	11713	-	73651040	ENST00000372873.8	ENSG00000166317.12	promoter	SYNPO2L
-0.463518	3.18078	8.90274	0.00284743	0.180166	rDPI_37891	chr3	127823196	127823207	chr3:127823196..127823207,chr3:127823106..127823510,-;peak:chr3:127823201..127823202,-;peakCounts:1229.3	3577	-	127823201	ENST00000434178.6	ENSG00000074416.14	alternative	MGLL
0.413386	6.42323	8.89361	0.00286171	0.180894	rDPI_44495	chr6	30742671	30742696	chr6:30742671..30742696,chr6:30742401..30742901,-;peak:chr6:30742685..30742686,-;peakCounts:19849.5	49674	-	30742685	ENST00000376389.8	ENSG00000137312.15	promoter	FLOT1
-0.394061	6.05803	8.88848	0.00286975	0.18095	rDPI_24421	chr19	1241801	1241807	chr19:1241801..1241807,chr19:1241708..1242002,+;peak:chr19:1241803..1241804,+;peakCounts:32977.9	53421	+	1241803	ENST00000588538.5	ENSG00000099624.8	alternative	ATP5F1D
0.397948	1.04208	8.88709	0.00287194	0.18095	rDPI_15572	chr14	45344382	45344397	chr14:45344382..45344397,chr14:45344296..45344415,+;peak:chr14:45344391..45344392,+;peakCounts:109.8	224	+	45344391	ENST00000566976.1	ENSG00000260046.1	enhancer	NA
0.630737	2.65629	8.88607	0.00287355	0.18095	rDPI_48431	chr7	113918870	113918880	chr7:113918870..113918880,chr7:113918529..113919164,-;peak:chr7:113918874..113918875,-;peakCounts:954.4	3163	-	113918874	ENST00000284602.1	ENSG00000154415.8	alternative	PPP1R3A
0.725967	2.46066	8.88426	0.0028764	0.18095	rDPI_3131	chr1	151728294	151728309	chr1:151728294..151728309,chr1:151728245..151728391,+;peak:chr1:151728300..151728301,+;peakCounts:1564.2	4215	+	151728300	ENST00000451222.5	ENSG00000178796.13	promoter	RIIAD1
-0.393494	1.60655	8.88423	0.00287645	0.18095	rDPI_2575	chr1	110873168	110873179	chr1:110873168..110873179,chr1:110873106..110873207,+;peak:chr1:110873170..110873171,+;peakCounts:161	718	+	110873170	ENST00000471220.5	ENSG00000143119.14	alternative	CD53
0.385022	1.60508	8.88156	0.00288066	0.180957	rDPI_3181	chr1	153616934	153616954	chr1:153616934..153616954,chr1:153616903..153617009,-;peak:chr1:153616941..153616942,-;peakCounts:226.8	661	-	153616941	ENST00000469571.1	ENSG00000189334.9	alternative	S100A14
0.323327	3.60262	8.87907	0.00288458	0.180957	rDPI_40094	chr4	88523798	88523802	chr4:88523798..88523802,chr4:88523564..88523830,-;peak:chr4:88523801..88523802,-;peakCounts:3791.3	6572	-	88523801	ENST00000273968.5	ENSG00000145337.5	alternative	PYURF
0.347706	5.47452	8.87888	0.00288488	0.180957	rDPI_9329	chr11	65096234	65096242	chr11:65096234..65096242,chr11:65096101..65096265,+;peak:chr11:65096241..65096242,+;peakCounts:23146.2	35774	+	65096241	ENST00000533487.1	ENSG00000149823.9	promoter	VPS51
0.475846	1.98787	8.86459	0.00290756	0.182042	rDPI_20543	chr17	752789	752803	chr17:752789..752803,chr17:752742..752857,-;peak:chr17:752793..752794,-;peakCounts:680.4	1300	-	752793	ENST00000570364.5	ENSG00000179409.11	promoter	GEMIN4
-0.572523	3.2803	8.86322	0.00290974	0.182042	rDPI_5508	chr10	5094409	5094420	chr10:5094409..5094420,chr10:5094365..5094463,+;peak:chr10:5094414..5094415,+;peakCounts:2492.1	4522	+	5094414	ENST00000480697.6	ENSG00000196139.14	alternative	AKR1C3
0.475447	2.46171	8.86273	0.00291053	0.182042	rDPI_17132	chr15	40807681	40807707	chr15:40807681..40807707,chr15:40807606..40807763,+;peak:chr15:40807694..40807695,+;peakCounts:928.8	3351	+	40807694	ENST00000566407.5	ENSG00000166140.17	promoter	ZFYVE19
0.391552	8.55912	8.86022	0.00291453	0.182118	rDPI_27920	chr2	27071641	27071654	chr2:27071641..27071654,chr2:27071331..27071800,-;peak:chr2:27071649..27071650,-;peakCounts:80407.8	211375	-	27071649	ENST00000447619.5	ENSG00000228474.6	promoter	OST4
0.483833	1.53836	8.85736	0.00291909	0.182228	rDPI_3051	chr1	150808259	150808262	chr1:150808259..150808262,chr1:150808257..150808369,-;peak:chr1:150808259..150808260,-;peakCounts:221.9	667	-	150808259	ENST00000271651.8	ENSG00000143387.14	alternative	CTSK
0.40325	2.4587	8.85409	0.00292432	0.182323	rDPI_223	chr1	5992690	5992708	chr1:5992690..5992708,chr1:5992630..5992747,+;peak:chr1:5992694..5992695,+;peakCounts:1077.3	2863	+	5992694	ENST00000493807.2	ENSG00000069424.15	promoter	KCNAB2
-0.880295	7.92007	8.85222	0.00292732	0.182323	rDPI_19994	chr16	66925405	66925571	chr16:66925405..66925571,chr16:66925405..66925571,-	165992	-	66925535	ENST00000420652.5	ENSG00000166592.12	promoter	RRAD
0.554211	5.60248	8.85119	0.00292898	0.182323	rDPI_40138	chr4	94451969	94451973	chr4:94451969..94451973,chr4:94451820..94452050,+;peak:chr4:94451972..94451973,+;peakCounts:18142.9	35389	+	94451972	ENST00000542407.5	ENSG00000163110.15	alternative	PDLIM5
-0.336696	2.95374	8.84692	0.00293584	0.182575	rDPI_54297	chrX	72277263	72277273	chrX:72277263..72277273,chrX:72277196..72277336,-;peak:chrX:72277267..72277268,-;peakCounts:2080.5	3893	-	72277267	ENST00000316084.10	ENSG00000198034.11	alternative	RPS4X
0.498111	2.23646	8.84029	0.00294653	0.182714	rDPI_37854	chr3	126343146	126343148	chr3:126343146..126343148,+	1053	+	126343146	ENST00000652931.1	ENSG00000287440.1	enhancer	LOC105374088
-0.543685	1.38385	8.83802	0.00295019	0.182714	rDPI_11147	chr12	10409542	10409550	chr12:10409542..10409550,-	576	-	10409543	ENST00000539300.5	ENSG00000255819.7	promoter	NA
0.575859	1.98714	8.83789	0.00295041	0.182714	rDPI_54782	chrX	132411211	132411225	chrX:132411211..132411225,chrX:132411192..132411425,-;peak:chrX:132411220..132411221,-;peakCounts:51.2	1110	-	132411220	ENST00000473364.1	ENSG00000076770.14	enhancer	MBNL3
-0.524514	2.64477	8.83387	0.00295691	0.182714	rDPI_4484	chr1	204828669	204828679	chr1:204828669..204828679,chr1:204828619..204828756,+;peak:chr1:204828675..204828676,+;peakCounts:1107.2	2989	+	204828675	ENST00000539706.5	ENSG00000163531.16	alternative	NFASC
0.51612	5.60028	8.83364	0.00295728	0.182714	rDPI_1575	chr1	44780743	44780747	chr1:44780743..44780747,-	25106	-	44780745	ENST00000594193.1	ENSG00000234093.3	promoter	RPS15AP11
-0.467545	2.32798	8.83299	0.00295833	0.182714	rDPI_2574	chr1	110873146	110873154	chr1:110873146..110873154,chr1:110873106..110873207,+;peak:chr1:110873148..110873149,+;peakCounts:819	1532	+	110873148	ENST00000271324.6	ENSG00000143119.14	promoter	CD53
-0.31952	1.73296	8.83279	0.00295865	0.182714	rDPI_53861	chrX	41333918	41333938	chrX:41333918..41333938,chrX:41333869..41333978,+;peak:chrX:41333933..41333934,+;peakCounts:367.2	1068	+	41333933	ENST00000457138.7	ENSG00000215301.11	alternative	DDX3X
-0.287339	3.78506	8.83157	0.00296063	0.182714	rDPI_13908	chr13	31161997	31162014	chr13:31161997..31162014,chr13:31161487..31162051,-;peak:chr13:31162013..31162014,-;peakCounts:632.3	8898	-	31162013	ENST00000629751.1	ENSG00000120694.20	alternative	HSPH1
-0.354913	1.46948	8.82996	0.00296325	0.182714	rDPI_13484	chr12	122527246	122527266	chr12:122527246..122527266,chr12:122527184..122527282,+;peak:chr12:122527260..122527261,+;peakCounts:241.2	596	+	122527260	ENST00000535410.1	ENSG00000184445.12	promoter	KNTC1
0.554501	1.20087	8.82355	0.00297367	0.183184	rDPI_9850	chr11	74697514	74697533	chr11:74697514..74697533,-	322	-	74697514	ENST00000529912.5	ENSG00000054938.16	enhancer	CHRDL2
0.346612	3.81755	8.82139	0.0029772	0.183229	rDPI_21962	chr17	42562146	42562156	chr17:42562146..42562156,chr17:42562082..42562216,+;peak:chr17:42562151..42562152,+;peakCounts:4000.5	8443	+	42562151	ENST00000421097.6	ENSG00000068120.15	promoter	COASY
-0.402617	3.1773	8.80962	0.00299647	0.184147	rDPI_18989	chr16	4802870	4802888	chr16:4802870..4802888,chr16:4802802..4802957,-;peak:chr16:4802876..4802877,-;peakCounts:1113.3	4372	-	4802876	ENST00000585871.1	ENSG00000067836.13	alternative	ROGDI
0.766857	2.18738	8.80779	0.00299946	0.184147	rDPI_21282	chr17	17823603	17823615	chr17:17823603..17823615,chr17:17823583..17823682,-;peak:chr17:17823604..17823605,-;peakCounts:504	1388	-	17823604	ENST00000583732.1	ENSG00000072310.17	promoter	SREBF1
0.418402	3.16399	8.80516	0.0030038	0.184147	rDPI_4411	chr1	203026487	203026503	chr1:203026487..203026503,chr1:203026421..203026556,+;peak:chr1:203026491..203026492,+;peakCounts:2273.4	6413	+	203026491	ENST00000367240.6	ENSG00000143847.15	promoter	PPFIA4
-0.346872	1.32416	8.80383	0.00300598	0.184147	rDPI_5122	chr1	233613887	233613896	chr1:233613887..233613896,chr1:233613542..233614513,+;peak:chr1:233613891..233613892,+;peakCounts:31.8	504	+	233613891	ENST00000366621.8	ENSG00000135750.15	alternative	KCNK1
-0.365049	1.17332	8.80368	0.00300623	0.184147	rDPI_45103	chr6	43060511	43060523	chr6:43060511..43060523,chr6:43060453..43060561,+;peak:chr6:43060516..43060517,+;peakCounts:87.3	338	+	43060516	ENST00000481888.1	ENSG00000137171.15	alternative	KLC4
-0.561227	4.04782	8.79497	0.00302062	0.184507	rDPI_41278	chr5	997311	997323	chr5:997311..997323,chr5:997289..997381,-;peak:chr5:997318..997319,-;peakCounts:3024	9499	-	997318	ENST00000399869.1	ENSG00000215246.5	promoter	LOC100506688
-0.325171	2.39124	8.79322	0.00302353	0.184507	rDPI_30122	chr2	174682849	174682853	chr2:174682849..174682853,chr2:174682827..174683017,-;peak:chr2:174682849..174682850,-;peakCounts:1362.6	1663	-	174682849	ENST00000469002.1	ENSG00000115935.18	alternative	WIPF1
0.390563	1.07639	8.79246	0.00302478	0.184507	rDPI_26738	chr19	46636168	46636203	chr19:46636168..46636203,-	239	-	46636180	ENST00000300873.4	ENSG00000167414.4	enhancer	GNG8
0.424128	6.06173	8.79182	0.00302585	0.184507	rDPI_22303	chr17	48831046	48831047	chr17:48831046..48831047,chr17:48830954..48831073,+;peak:chr17:48831046..48831047,+;peakCounts:36821.4	41464	+	48831046	ENST00000511697.1	ENSG00000136436.15	alternative	CALCOCO2
-0.566611	1.40673	8.79132	0.00302667	0.184507	rDPI_31949	chr2	215367938	215367963	chr2:215367938..215367963,chr2:215367871..215368022,-;peak:chr2:215367944..215367945,-;peakCounts:81	550	-	215367944	ENST00000473614.1	ENSG00000115414.21	enhancer	FN1
-0.448503	1.31336	8.78989	0.00302905	0.184507	rDPI_31941	chr2	215361364	215361376	chr2:215361364..215361376,chr2:215361199..215361383,-;peak:chr2:215361370..215361371,-;peakCounts:225.9	411	-	215361370	ENST00000498719.1	ENSG00000115414.21	enhancer	FN1
0.722177	2.02596	8.78668	0.00303439	0.184565	rDPI_1604	chr1	45550893	45550899	chr1:45550893..45550899,chr1:45550790..45550918,+;peak:chr1:45550898..45550899,+;peakCounts:1039.5	1501	+	45550898	ENST00000476957.5	ENSG00000117448.14	alternative	AKR1A1
0.377038	5.50029	8.78397	0.0030389	0.184565	rDPI_12682	chr12	96035577	96035596	chr12:96035577..96035596,chr12:96035512..96035679,-;peak:chr12:96035577..96035578,-;peakCounts:6032.7	29547	-	96035577	ENST00000228740.7	ENSG00000111144.10	promoter	LTA4H
-0.521	1.42331	8.78396	0.00303891	0.184565	rDPI_1024	chr1	27666380	27666396	chr1:27666380..27666396,chr1:27666323..27666476,-;peak:chr1:27666385..27666386,-;peakCounts:245.7	375	-	27666385	ENST00000681370.1	ENSG00000233975.2	promoter	LINC02574
-0.495384	1.1082	8.78251	0.00304132	0.184565	rDPI_14684	chr14	20955470	20955473	chr14:20955470..20955473,chr14:20955402..20955514,+;peak:chr14:20955471..20955472,+;peakCounts:372.6	598	+	20955471	ENST00000304625.3	ENSG00000169385.3	promoter	RNASE2
-0.402032	2.20531	8.7759	0.00305237	0.184788	rDPI_44674	chr6	32178405	32178411	chr6:32178405..32178411,chr6:32178325..32178632,+;peak:chr6:32178405..32178406,+;peakCounts:711.6	1878	+	32178405	ENST00000375094.4	ENSG00000204308.8	alternative	RNF5
0.960884	3.06809	8.77541	0.00305318	0.184788	rDPI_3897	chr1	171652683	171652689	chr1:171652683..171652689,-	3860	-	171652688	ENST00000037502.11	ENSG00000034971.17	promoter	MYOC
-1.04642	1.36062	8.7726	0.00305789	0.184788	rDPI_46979	chr7	22727177	22727183	chr7:22727177..22727183,chr7:22727140..22727285,+;peak:chr7:22727177..22727178,+;peakCounts:498.4	1334	+	22727177	ENST00000485300.1	ENSG00000136244.12	alternative	IL6
-0.621189	2.06172	8.77091	0.00306074	0.184788	rDPI_44638	chr6	31927713	31927724	chr6:31927713..31927724,chr6:31927625..31927755,+;peak:chr6:31927718..31927719,+;peakCounts:759.6	1623	+	31927718	ENST00000299367.10	ENSG00000166278.15	promoter	C2
0.428526	5.19084	8.76973	0.0030627	0.184788	rDPI_14408	chr13	97976669	97976684	chr13:97976669..97976684,chr13:97976442..97976714,+;peak:chr13:97976678..97976679,+;peakCounts:9842.4	21467	+	97976678	ENST00000497270.5	ENSG00000065150.21	promoter	IPO5
-0.320381	2.17386	8.7673	0.00306679	0.184788	rDPI_38927	chr3	196503732	196503743	chr3:196503732..196503743,chr3:196503555..196503866,-;peak:chr3:196503737..196503738,-;peakCounts:449.2	1575	-	196503737	ENST00000318037.3	ENSG00000163961.4	alternative	RNF168
0.312479	1.893	8.76259	0.00307473	0.184788	rDPI_10090	chr11	96390041	96390044	chr11:96390041..96390044,chr11:96389977..96390073,+;peak:chr11:96390042..96390043,+;peakCounts:692.6	1467	+	96390042	ENST00000332349.5	ENSG00000183340.7	alternative	JRKL
0.700935	1.07889	8.76253	0.00307482	0.184788	rDPI_28744	chr2	68882064	68882070	chr2:68882064..68882070,chr2:68882013..68882126,-;peak:chr2:68882064..68882065,-;peakCounts:127.9	195	-	68882064	ENST00000295379.2	ENSG00000163217.2	alternative	BMP10
0.515719	2.85076	8.76201	0.0030757	0.184788	rDPI_5699	chr10	18340759	18340770	chr10:18340759..18340770,chr10:18340650..18340910,+;peak:chr10:18340764..18340765,+;peakCounts:2843.1	4033	+	18340764	ENST00000498816.1	ENSG00000165995.22	alternative	CACNB2
0.378933	1.18227	8.76113	0.00307718	0.184788	rDPI_17831	chr15	66702553	66702554	chr15:66702553..66702554,chr15:66702551..66702626,+;peak:chr15:66702553..66702554,+;peakCounts:323.1	359	+	66702553	ENST00000288840.10	ENSG00000137834.15	enhancer	SMAD6
-0.33247	4.73676	8.7602	0.00307875	0.184788	rDPI_42617	chr5	123036705	123036712	chr5:123036705..123036712,chr5:123036619..123036763,-;peak:chr5:123036709..123036710,-;peakCounts:4855.1	12013	-	123036709	ENST00000415659.2	ENSG00000168938.6	alternative	PPIC
-0.84475	2.38792	8.75995	0.00307917	0.184788	rDPI_15010	chr14	23404815	23404825	chr14:23404815..23404825,chr14:23404700..23404869,-;peak:chr14:23404820..23404821,-;peakCounts:677.8	1924	-	23404820	ENST00000557461.2	ENSG00000197616.13	alternative	MYH6
-0.667848	3.05195	8.75841	0.00308178	0.184788	rDPI_28640	chr2	68365282	68365284	chr2:68365282..68365284,chr2:68365224..68365350,+;peak:chr2:68365282..68365283,+;peakCounts:4051.8	4593	+	68365282	ENST00000234313.8	ENSG00000115956.10	promoter	PLEK
-0.883494	2.51288	8.75051	0.00309516	0.18542	rDPI_15047	chr14	23413884	23413897	chr14:23413884..23413897,chr14:23413764..23413897,-;peak:chr14:23413889..23413890,-;peakCounts:547.2	2273	-	23413889	ENST00000401172.1	ENSG00000215991.1	alternative	MIR208B
0.499423	5.07196	8.74714	0.00310088	0.185588	rDPI_19223	chr16	21158666	21158686	chr16:21158666..21158686,chr16:21158587..21158730,+;peak:chr16:21158679..21158680,+;peakCounts:8906.4	23799	+	21158679	ENST00000574092.1	ENSG00000011638.11	promoter	TMEM159
0.624844	4.15477	8.74527	0.00310406	0.185588	rDPI_16177	chr14	75981987	75981997	chr14:75981987..75981997,chr14:75981802..75982023,-;peak:chr14:75981995..75981996,-;peakCounts:5237.1	11557	-	75981995	ENST00000238682.8	ENSG00000119699.8	promoter	TGFB3
0.369576	1.59686	8.73383	0.00312359	0.185588	rDPI_26790	chr19	47274880	47274890	chr19:47274880..47274890,chr19:47274852..47274996,+;peak:chr19:47274885..47274886,+;peakCounts:349.1	917	+	47274885	ENST00000552360.4	ENSG00000257704.4	alternative	INAFM1
-0.659346	3.34691	8.73321	0.00312466	0.185588	rDPI_9374	chr11	65423178	65423197	chr11:65423178..65423197,chr11:65423118..65423291,-;peak:chr11:65423183..65423184,-;peakCounts:1404.9	3252	-	65423183	ENST00000526898.5	ENSG00000162241.12	promoter	SLC25A45
0.65734	2.45587	8.7327	0.00312553	0.185588	rDPI_20231	chr16	72074210	72074211	chr16:72074210..72074211,chr16:72073966..72074396,+;peak:chr16:72074210..72074211,+;peakCounts:1301.7	2782	+	72074210	ENST00000561827.1	ENSG00000260252.1	alternative	NA
0.6173	0.992322	8.73259	0.00312572	0.185588	rDPI_20238	chr16	72094372	72094380	chr16:72094372..72094380,-	202	-	72094378	ENST00000426362.6	ENSG00000140830.9	promoter	TXNL4B
-0.363363	1.54623	8.73161	0.00312741	0.185588	rDPI_38886	chr3	195271154	195271168	chr3:195271154..195271168,chr3:195271082..195271184,-;peak:chr3:195271159..195271160,-;peakCounts:307.8	761	-	195271159	ENST00000310380.11	ENSG00000173950.16	promoter	XXYLT1
0.373541	2.68997	8.73108	0.00312832	0.185588	rDPI_12266	chr12	57936141	57936144	chr12:57936141..57936144,chr12:57936048..57936203,-;peak:chr12:57936141..57936142,-;peakCounts:1844.7	2817	-	57936141	ENST00000655210.1	ENSG00000257698.2	alternative	GIHCG
-0.401289	0.97427	8.7306	0.00312913	0.185588	rDPI_38906	chr3	195892753	195892756	chr3:195892753..195892756,chr3:195892694..195892757,-;peak:chr3:195892755..195892756,-;peakCounts:54.3	137	-	195892755	ENST00000678220.1	ENSG00000061938.20	alternative	TNK2
0.41731	7.30764	8.73057	0.00312918	0.185588	rDPI_28920	chr2	74472677	74472688	chr2:74472677..74472688,chr2:74472573..74472718,-;peak:chr2:74472687..74472688,-;peakCounts:35928.9	104993	-	74472687	ENST00000258105.8	ENSG00000204822.7	promoter	MRPL53
0.868582	2.19527	8.73026	0.00312971	0.185588	rDPI_10219	chr11	111814697	111814714	chr11:111814697..111814714,chr11:111814631..111814790,-;peak:chr11:111814706..111814707,-;peakCounts:336	1364	-	111814706	ENST00000527212.5	ENSG00000086848.15	promoter	ALG9
-0.338408	1.56446	8.72754	0.00313439	0.185588	rDPI_42956	chr5	139648321	139648324	chr5:139648321..139648324,chr5:139648273..139648459,+;peak:chr5:139648321..139648322,+;peakCounts:116.3	924	+	139648321	ENST00000302517.8	ENSG00000171604.12	alternative	CXXC5
0.338644	5.10434	8.72569	0.00313757	0.185588	rDPI_17594	chr15	59657512	59657520	chr15:59657512..59657520,chr15:59657422..59657590,-;peak:chr15:59657515..59657516,-;peakCounts:10452.6	14326	-	59657515	ENST00000396060.7	ENSG00000140307.11	promoter	GTF2A2
0.370106	1.34149	8.72351	0.00314133	0.185588	rDPI_33643	chr20	47318993	47319004	chr20:47318993..47319004,chr20:47318975..47319168,-;peak:chr20:47318998..47318999,-;peakCounts:197.1	401	-	47318998	ENST00000468376.2	ENSG00000101040.19	alternative	ZMYND8
0.372791	2.65431	8.72263	0.00314284	0.185588	rDPI_45642	chr6	100881359	100881370	chr6:100881359..100881370,chr6:100881191..100881414,-;peak:chr6:100881364..100881365,-;peakCounts:1663.8	2825	-	100881364	ENST00000522650.5	ENSG00000112249.14	alternative	ASCC3
-0.547836	1.92578	8.72143	0.00314492	0.185588	rDPI_16740	chr14	105478829	105478848	chr14:105478829..105478848,chr14:105478725..105478866,+;peak:chr14:105478837..105478838,+;peakCounts:283.7	1378	+	105478837	ENST00000551738.1	ENSG00000182809.11	alternative	CRIP2
1.07458	4.81384	8.72064	0.00314628	0.185588	rDPI_29235	chr2	99404879	99404880	chr2:99404879..99404880,chr2:99404816..99404933,-;peak:chr2:99404879..99404880,-;peakCounts:13031.1	14479	-	99404879	ENST00000465086.1	ENSG00000135945.10	enhancer	REV1
-0.707212	1.16626	8.71639	0.00315362	0.185715	rDPI_34204	chr21	25562129	25562132	chr21:25562129..25562132,+	653	+	25562131	ENST00000659862.1	ENSG00000234883.6	promoter	MIR155HG
0.347084	1.24788	8.7161	0.00315412	0.185715	rDPI_33406	chr20	38085011	38085022	chr20:38085011..38085022,chr20:38084920..38085034,+;peak:chr20:38085019..38085020,+;peakCounts:216.7	444	+	38085019	ENST00000484683.1	ENSG00000101413.12	alternative	RPRD1B
0.323382	2.70601	8.71149	0.00316211	0.185805	rDPI_41320	chr5	6378554	6378560	chr5:6378554..6378560,chr5:6378484..6378616,-;peak:chr5:6378557..6378558,-;peakCounts:1918	3013	-	6378557	ENST00000255764.4	ENSG00000133398.4	alternative	MED10
-0.512419	1.16362	8.70839	0.0031675	0.185805	rDPI_54286	chrX	72160320	72160331	chrX:72160320..72160331,chrX:72160285..72160344,+;peak:chrX:72160324..72160325,+;peakCounts:128	483	+	72160324	ENST00000432517.1	ENSG00000225471.5	alternative	NA
0.864949	5.02457	8.70799	0.00316819	0.185805	rDPI_20229	chr16	72074178	72074188	chr16:72074178..72074188,chr16:72073966..72074396,+;peak:chr16:72074180..72074181,+;peakCounts:13322.7	24997	+	72074180	ENST00000561827.1	ENSG00000260252.1	promoter	NA
-1.26172	2.5193	8.70795	0.00316825	0.185805	rDPI_9480	chr11	65900383	65900396	chr11:65900383..65900396,chr11:65900321..65900492,-;peak:chr11:65900388..65900389,-;peakCounts:1590.3	3465	-	65900388	ENST00000312562.7	ENSG00000175592.9	promoter	FOSL1
-1.13784	3.34515	8.70702	0.00316988	0.185805	rDPI_29450	chr2	118942320	118942323	chr2:118942320..118942323,chr2:118942187..118942341,+;peak:chr2:118942322..118942323,+;peakCounts:5754.6	6808	+	118942322	ENST00000412481.1	ENSG00000019169.11	promoter	MARCO
-0.805816	3.30589	8.69667	0.00318791	0.186195	rDPI_1130	chr1	31369389	31369402	chr1:31369389..31369402,chr1:31369389..31369565,-;peak:chr1:31369389..31369390,-;peakCounts:1701.6	4086	-	31369389	ENST00000497275.5	ENSG00000121769.8	alternative	FABP3
-0.364329	2.19503	8.69593	0.00318921	0.186195	rDPI_47313	chr7	44082508	44082520	chr7:44082508..44082520,chr7:44082439..44082539,-;peak:chr7:44082511..44082512,-;peakCounts:665.1	1508	-	44082511	ENST00000458246.5	ENSG00000122678.17	alternative	POLM
0.333024	2.60119	8.69482	0.00319116	0.186195	rDPI_3320	chr1	154936646	154936652	chr1:154936646..154936652,chr1:154936604..154937022,-;peak:chr1:154936646..154936647,-;peakCounts:608.2	2657	-	154936646	ENST00000368467.4	ENSG00000163344.6	alternative	PMVK
0.354539	1.80322	8.69413	0.00319237	0.186195	rDPI_20653	chr17	1829857	1829868	chr17:1829857..1829868,chr17:1829786..1829933,-;peak:chr17:1829862..1829863,-;peakCounts:539	898	-	1829862	ENST00000305513.12	ENSG00000186532.12	alternative	SMYD4
0.441398	4.15171	8.69269	0.00319489	0.186195	rDPI_18964	chr16	4474619	4474638	chr16:4474619..4474638,chr16:4474477..4474691,-;peak:chr16:4474624..4474625,-;peakCounts:3611.7	9809	-	4474624	ENST00000404295.7	ENSG00000153406.14	promoter	NMRAL1
-0.488809	2.37646	8.69253	0.00319518	0.186195	rDPI_52979	chr9	132079866	132079869	chr9:132079866..132079869,-	2601	-	132079866	ENST00000357028.6	ENSG00000160563.14	promoter	MED27
-0.528554	1.84674	8.69177	0.0031965	0.186195	rDPI_6627	chr10	84142672	84142700	chr10:84142672..84142700,chr10:84142652..84142757,+;peak:chr10:84142694..84142695,+;peakCounts:110.6	729	+	84142694	ENST00000372134.6	ENSG00000165678.21	enhancer	GHITM
-0.598276	1.81582	8.68501	0.00320838	0.18653	rDPI_42660	chr5	128272120	128272121	chr5:128272120..128272121,chr5:128272112..128272181,-;peak:chr5:128272120..128272121,-;peakCounts:889.2	988	-	128272120	ENST00000507835.5	ENSG00000138829.12	enhancer	FBN2
0.386133	1.60342	8.6844	0.00320946	0.18653	rDPI_5191	chr1	236523595	236523601	chr1:236523595..236523601,chr1:236523546..236523608,+;peak:chr1:236523600..236523601,+;peakCounts:546.3	1095	+	236523600	ENST00000450372.6	ENSG00000116977.19	alternative	LGALS8
0.297663	5.71703	8.68362	0.00321082	0.18653	rDPI_3223	chr1	153658713	153658725	chr1:153658713..153658725,chr1:153658611..153658836,+;peak:chr1:153658717..153658718,+;peakCounts:12917	28030	+	153658717	ENST00000462880.1	ENSG00000143553.11	promoter	SNAPIN
0.394966	7.41177	8.68026	0.00321676	0.18655	rDPI_26818	chr19	47745547	47745553	chr19:47745547..47745553,chr19:47745484..47745772,+;peak:chr19:47745550..47745551,+;peakCounts:71545.5	128397	+	47745550	ENST00000594525.5	ENSG00000105373.19	promoter	NOP53
-0.831581	2.02926	8.67862	0.00321964	0.18655	rDPI_45872	chr6	118559049	118559078	chr6:118559049..118559078,chr6:118558819..118559283,+;peak:chr6:118559067..118559068,+;peakCounts:393.9	1814	+	118559067	ENST00000659521.1	ENSG00000286339.1	alternative	NA
-1.48341	7.83078	8.67857	0.00321973	0.18655	rDPI_44527	chr6	31272092	31272093	chr6:31272092..31272093,chr6:31272058..31272173,-;peak:chr6:31272092..31272093,-;peakCounts:78895.8	87662	-	31272092	ENST00000484378.1	ENSG00000204525.17	promoter	HLA-C
0.357085	5.01945	8.67485	0.00322631	0.186622	rDPI_25225	chr19	12669422	12669429	chr19:12669422..12669429,chr19:12669363..12669486,-;peak:chr19:12669425..12669426,-;peakCounts:6034.3	18844	-	12669425	ENST00000596731.7	ENSG00000105583.11	alternative	WDR83OS
0.369087	2.9001	8.67464	0.00322669	0.186622	rDPI_20731	chr17	4143196	4143202	chr17:4143196..4143202,chr17:4143124..4143238,+;peak:chr17:4143197..4143198,+;peakCounts:1686.6	3423	+	4143197	ENST00000301391.8	ENSG00000167740.10	promoter	CYB5D2
0.771851	3.07502	8.67174	0.00323183	0.186754	rDPI_10887	chr12	4626610	4626630	chr12:4626610..4626630,chr12:4626501..4626840,-;peak:chr12:4626617..4626618,-;peakCounts:1186.2	2810	-	4626617	ENST00000537929.1	ENSG00000256799.1	alternative	NA
0.353012	1.45609	8.66797	0.00323852	0.186975	rDPI_21805	chr17	39700198	39700210	chr17:39700198..39700210,chr17:39700155..39700236,+;peak:chr17:39700207..39700208,+;peakCounts:331.2	747	+	39700207	ENST00000584908.5	ENSG00000141736.14	alternative	ERBB2
0.814098	2.63041	8.66122	0.00325053	0.18737	rDPI_48416	chr7	112977268	112977273	chr7:112977268..112977273,chr7:112977174..112977286,-;peak:chr7:112977272..112977273,-;peakCounts:3077.8	6677	-	112977272	ENST00000663899.1	ENSG00000234520.6	alternative	HRAT17
0.474413	0.897528	8.6609	0.00325111	0.18737	rDPI_28741	chr2	68872943	68872988	chr2:68872943..68872988,-	58	-	68872987	ENST00000295379.2	ENSG00000163217.2	enhancer	BMP10
-0.580605	1.55741	8.6464	0.00327709	0.188675	rDPI_21860	chr17	40417881	40417902	chr17:40417881..40417902,chr17:40417878..40417946,-;peak:chr17:40417881..40417882,-;peakCounts:203.4	639	-	40417881	ENST00000423485.6	ENSG00000131747.15	promoter	TOP2A
0.727909	5.47428	8.64504	0.00327953	0.188675	rDPI_35575	chr22	42646969	42646977	chr22:42646969..42646977,chr22:42646811..42647067,-;peak:chr22:42646972..42646973,-;peakCounts:14708.7	23893	-	42646972	ENST00000407623.7	ENSG00000100243.21	promoter	CYB5R3
-0.428122	1.63179	8.64257	0.00328398	0.188765	rDPI_41432	chr5	17217600	17217608	chr5:17217600..17217608,chr5:17217549..17217664,+;peak:chr5:17217604..17217605,+;peakCounts:374.5	946	+	17217604	ENST00000322611.4	ENSG00000176788.9	alternative	BASP1
-0.443809	1.03309	8.63565	0.00329648	0.189317	rDPI_42570	chr5	118459776	118459785	chr5:118459776..118459785,+	194	+	118459776	ENST00000513366.1	ENSG00000249551.1	enhancer	NA
0.480076	1.72829	8.63124	0.00330446	0.189609	rDPI_37963	chr3	129278900	129278907	chr3:129278900..129278907,chr3:129278799..129279126,+;peak:chr3:129278903..129278904,+;peakCounts:465.8	1031	+	129278903	ENST00000510314.5	ENSG00000183624.14	alternative	HMCES
-0.748877	1.61793	8.62789	0.00331054	0.189791	rDPI_8403	chr11	19186290	19186298	chr11:19186290..19186298,chr11:19186219..19186358,-;peak:chr11:19186295..19186296,-;peakCounts:196.4	632	-	19186295	ENST00000647990.1	ENSG00000129170.10	alternative	CSRP3
0.36035	2.04432	8.6224	0.00332055	0.190197	rDPI_36426	chr3	40309506	40309517	chr3:40309506..40309517,chr3:40309448..40309577,-;peak:chr3:40309512..40309513,-;peakCounts:940.5	1643	-	40309512	ENST00000655651.1	ENSG00000280739.3	promoter	EIF1B-AS1
-0.547388	1.33428	8.6171	0.00333021	0.190584	rDPI_27801	chr2	20637448	20637457	chr2:20637448..20637457,chr2:20637325..20637547,+;peak:chr2:20637452..20637453,+;peakCounts:43.5	479	+	20637452	ENST00000272224.5	ENSG00000143869.7	alternative	GDF7
0.334342	1.60605	8.60406	0.00335415	0.191762	rDPI_52943	chr9	131277877	131277891	chr9:131277877..131277891,chr9:131277857..131277935,-;peak:chr9:131277882..131277883,-;peakCounts:339.3	774	-	131277882	ENST00000372271.4	ENSG00000126882.13	alternative	FAM78A
-0.573605	2.03794	8.60269	0.00335667	0.191762	rDPI_43425	chr5	157109035	157109053	chr5:157109035..157109053,chr5:157109003..157109098,-;peak:chr5:157109045..157109046,-;peakCounts:359.1	1384	-	157109045	ENST00000307851.9	ENSG00000135077.9	promoter	HAVCR2
0.559176	5.75741	8.58047	0.00339788	0.193737	rDPI_13295	chr12	117099413	117099422	chr12:117099413..117099422,chr12:117099234..117099496,-;peak:chr12:117099415..117099416,-;peakCounts:9603.9	25158	-	117099415	ENST00000335209.12	ENSG00000088992.18	promoter	TESC
-1.29581	3.85458	8.58017	0.00339845	0.193737	rDPI_2806	chr1	119768904	119768906	chr1:119768904..119768906,chr1:119768895..119769012,-;peak:chr1:119768905..119768906,-;peakCounts:7019.1	8020	-	119768905	ENST00000369406.8	ENSG00000134240.12	promoter	HMGCS2
-0.468466	2.15934	8.57722	0.00340394	0.193737	rDPI_12061	chr12	56160255	56160269	chr12:56160255..56160269,chr12:56160240..56160330,+;peak:chr12:56160261..56160262,+;peakCounts:342.9	1065	+	56160261	ENST00000546845.1	ENSG00000092841.19	alternative	MYL6
-0.575272	1.34434	8.57543	0.0034073	0.193737	rDPI_8775	chr11	47342640	47342657	chr11:47342640..47342657,chr11:47342576..47342750,-;peak:chr11:47342652..47342653,-;peakCounts:52.4	642	-	47342652	ENST00000544791.1	ENSG00000134571.11	alternative	MYBPC3
-0.75827	6.10805	8.57466	0.00340874	0.193737	rDPI_15502	chr14	35404749	35404752	chr14:35404749..35404752,chr14:35404421..35404820,-;peak:chr14:35404751..35404752,-;peakCounts:18056.7	37993	-	35404751	ENST00000216797.10	ENSG00000100906.11	promoter	NFKBIA
-0.819468	3.69827	8.57449	0.00340905	0.193737	rDPI_20416	chr16	85805763	85805813	chr16:85805763..85805813,chr16:85805731..85805860,+;peak:chr16:85805789..85805790,+;peakCounts:719.1	4069	+	85805789	ENST00000562929.1	ENSG00000131143.10	alternative	COX4I1
0.407842	3.07065	8.56877	0.00341978	0.193881	rDPI_49794	chr8	33599940	33599961	chr8:33599940..33599961,chr8:33599899..33600024,-;peak:chr8:33599950..33599951,-;peakCounts:745.7	3901	-	33599950	ENST00000523956.1	ENSG00000133878.9	alternative	DUSP26
-0.693978	1.35999	8.56795	0.00342133	0.193881	rDPI_3282	chr1	154191300	154191311	chr1:154191300..154191311,chr1:154191186..154191315,-;peak:chr1:154191304..154191305,-;peakCounts:165.6	479	-	154191304	ENST00000466010.1	ENSG00000143549.21	alternative	TPM3
0.848135	6.51065	8.56602	0.00342495	0.193881	rDPI_48415	chr7	112977240	112977255	chr7:112977240..112977255,chr7:112977174..112977286,-;peak:chr7:112977249..112977250,-;peakCounts:25174.8	46890	-	112977249	ENST00000663899.1	ENSG00000234520.6	promoter	HRAT17
-0.888635	4.43982	8.56567	0.00342561	0.193881	rDPI_42715	chr5	132490773	132490777	chr5:132490773..132490777,chr5:132490713..132490842,-;peak:chr5:132490773..132490774,-;peakCounts:11891.7	13521	-	132490773	ENST00000679921.1	ENSG00000125347.15	promoter	IRF1
0.403581	6.04445	8.56523	0.00342643	0.193881	rDPI_39869	chr4	76306728	76306748	chr4:76306728..76306748,chr4:76306494..76306915,+;peak:chr4:76306742..76306743,+;peakCounts:17665.2	40220	+	76306742	ENST00000237642.7	ENSG00000118804.9	promoter	STBD1
-0.591206	1.88615	8.56245	0.00343168	0.193905	rDPI_45024	chr6	41163110	41163167	chr6:41163110..41163167,chr6:41163110..41163167,-	1166	-	41163116	ENST00000373113.8	ENSG00000095970.17	promoter	TREM2
-0.671706	2.83322	8.56186	0.00343278	0.193905	rDPI_41433	chr5	17217622	17217635	chr5:17217622..17217635,chr5:17217549..17217664,+;peak:chr5:17217631..17217632,+;peakCounts:1669.5	3925	+	17217631	ENST00000322611.4	ENSG00000176788.9	promoter	BASP1
-1.0952	2.22158	8.557	0.00344197	0.194243	rDPI_16777	chr14	106154157	106154164	chr14:106154157..106154164,-	1887	-	106154163	ENST00000390603.2	ENSG00000211943.2	promoter	IGHV3-15
0.302983	2.62912	8.55001	0.0034552	0.194243	rDPI_12384	chr12	68332354	68332368	chr12:68332354..68332368,chr12:68332262..68332397,-;peak:chr12:68332361..68332362,-;peakCounts:873.9	2059	-	68332361	ENST00000430606.3	ENSG00000111554.14	promoter	MDM1
0.697536	3.297	8.54868	0.00345773	0.194243	rDPI_33570	chr20	45407301	45407312	chr20:45407301..45407312,chr20:45407177..45407422,+;peak:chr20:45407306..45407307,+;peakCounts:3440.7	4458	+	45407306	ENST00000372712.6	ENSG00000244274.8	promoter	DBNDD2
0.428913	2.05341	8.54781	0.00345939	0.194243	rDPI_41522	chr5	34929806	34929812	chr5:34929806..34929812,chr5:34929738..34929859,-;peak:chr5:34929806..34929807,-;peakCounts:428.2	1148	-	34929806	ENST00000341754.8	ENSG00000113456.19	alternative	RAD1
0.501283	2.36108	8.54728	0.00346039	0.194243	rDPI_25626	chr19	18433665	18433772	chr19:18433665..18433772,chr19:18433665..18433772,+	2398	+	18433708	ENST00000599699.2	ENSG00000130511.16	enhancer	SSBP4
0.340671	1.41538	8.54601	0.0034628	0.194243	rDPI_37343	chr3	73625458	73625468	chr3:73625458..73625468,chr3:73625456..73625649,-;peak:chr3:73625458..73625459,-;peakCounts:269.1	453	-	73625458	ENST00000263666.9	ENSG00000121440.15	alternative	PDZRN3
0.338289	3.72088	8.54582	0.00346316	0.194243	rDPI_36819	chr3	49166317	49166327	chr3:49166317..49166327,chr3:49166271..49166365,-;peak:chr3:49166323..49166324,-;peakCounts:1571.4	5537	-	49166323	ENST00000321895.7	ENSG00000177352.10	promoter	CCDC71
-0.503161	0.962769	8.54511	0.00346452	0.194243	rDPI_34064	chr21	8225311	8225313	chr21:8225311..8225313,+	147	+	8225312	ENST00000651830.1	ENSG00000286155.1	promoter	NA
-0.52274	1.03756	8.54433	0.003466	0.194243	rDPI_43997	chr6	7331463	7331470	chr6:7331463..7331470,-	264	-	7331463	ENST00000404326.1	ENSG00000219375.1	enhancer	NA
0.930639	1.59671	8.54128	0.00347181	0.194243	rDPI_36597	chr3	45995862	45995875	chr3:45995862..45995875,chr3:45995841..45995976,+;peak:chr3:45995867..45995868,+;peakCounts:206.6	870	+	45995867	ENST00000413087.1	ENSG00000226933.1	promoter	NA
-0.429971	1.87029	8.54033	0.00347362	0.194243	rDPI_31923	chr2	212538795	212538810	chr2:212538795..212538810,chr2:212538772..212538892,-;peak:chr2:212538802..212538803,-;peakCounts:450	1215	-	212538802	ENST00000342788.9	ENSG00000178568.15	promoter	ERBB4
0.690456	5.65354	8.53839	0.00347733	0.194243	rDPI_20797	chr17	4951120	4951121	chr17:4951120..4951121,chr17:4951048..4951211,+;peak:chr17:4951120..4951121,+;peakCounts:163489.5	181655	+	4951120	ENST00000519602.6	ENSG00000108515.18	promoter	ENO3
1.11635	7.55536	8.53681	0.00348035	0.194243	rDPI_38902	chr3	195583940	195583941	chr3:195583940..195583941,chr3:195583903..195584174,-;peak:chr3:195583940..195583941,-;peakCounts:60251.4	66946	-	195583940	ENST00000343267.8	ENSG00000189058.9	promoter	APOD
0.320334	1.72333	8.53678	0.00348042	0.194243	rDPI_55141	chrX	155071210	155071213	chrX:155071210..155071213,chrX:155070941..155071316,-;peak:chrX:155071211..155071212,-;peakCounts:243.7	600	-	155071211	ENST00000369484.8	ENSG00000182712.16	alternative	CMC4
-0.897876	4.02931	8.53169	0.00349016	0.19462	rDPI_11079	chr12	7936186	7936188	chr12:7936186..7936188,chr12:7936123..7936223,-;peak:chr12:7936187..7936188,-;peakCounts:7173.9	10167	-	7936187	ENST00000075120.12	ENSG00000059804.16	promoter	SLC2A3
0.548646	6.84153	8.51729	0.00351788	0.195999	rDPI_45217	chr6	46015705	46015711	chr6:46015705..46015711,chr6:46015484..46015928,-;peak:chr6:46015705..46015706,-;peakCounts:65955.6	78525	-	46015705	ENST00000642250.1	ENSG00000112782.19	promoter	CLIC5
0.383725	1.20985	8.51309	0.00352601	0.196165	rDPI_28886	chr2	74148135	74148146	chr2:74148135..74148146,chr2:74147979..74148157,+;peak:chr2:74148140..74148141,+;peakCounts:326.7	417	+	74148140	ENST00000656407.1	ENSG00000225439.3	promoter	BOLA3-AS1
-0.546394	2.08899	8.5122	0.00352773	0.196165	rDPI_10803	chr12	2053020	2053026	chr12:2053020..2053026,chr12:2052955..2053116,+;peak:chr12:2053025..2053026,+;peakCounts:1042.1	2218	+	2053025	ENST00000399655.6	ENSG00000151067.22	alternative	CACNA1C
-1.00083	3.27835	8.51109	0.00352988	0.196165	rDPI_29168	chr2	96844020	96844027	chr2:96844020..96844027,chr2:96843970..96844160,-;peak:chr2:96844020..96844021,-;peakCounts:3177.9	5514	-	96844020	ENST00000318357.9	ENSG00000163126.15	promoter	ANKRD23
0.450916	1.04395	8.50892	0.0035341	0.196233	rDPI_26924	chr19	49014384	49014395	chr19:49014384..49014395,chr19:49014365..49014433,+;peak:chr19:49014387..49014388,+;peakCounts:73.2	233	+	49014387	ENST00000595002.1	ENSG00000183207.14	enhancer	RUVBL2
0.400711	1.1775	8.50113	0.00354927	0.196822	rDPI_3847	chr1	169630134	169630138	chr1:169630134..169630138,chr1:169630076..169630182,-;peak:chr1:169630136..169630137,-;peakCounts:81.3	269	-	169630136	ENST00000263686.11	ENSG00000174175.17	alternative	SELP
-0.364542	1.28005	8.50037	0.00355074	0.196822	rDPI_34276	chr21	29193420	29193431	chr21:29193420..29193431,chr21:29193375..29193491,+;peak:chr21:29193425..29193426,+;peakCounts:165.9	386	+	29193425	ENST00000447125.5	ENSG00000215533.8	alternative	LINC00189
-2.18725	6.01161	8.49446	0.00356229	0.197295	rDPI_44689	chr6	32589805	32589806	chr6:32589805..32589806,chr6:32589734..32589850,-;peak:chr6:32589805..32589806,-;peakCounts:23565.6	26184	-	32589805	ENST00000360004.5	ENSG00000196126.11	promoter	HLA-DRB1
-0.341371	3.46836	8.4926	0.00356595	0.19733	rDPI_11958	chr12	55712261	55712281	chr12:55712261..55712281,chr12:55712079..55712312,-;peak:chr12:55712280..55712281,-;peakCounts:2032.9	5071	-	55712280	ENST00000555687.5	ENSG00000135424.18	alternative	ITGA7
-0.69434	3.04545	8.49096	0.00356916	0.19734	rDPI_6164	chr10	58999622	58999634	chr10:58999622..58999634,chr10:58999559..58999676,+;peak:chr10:58999624..58999625,+;peakCounts:997.5	4272	+	58999624	ENST00000661129.1	ENSG00000237949.2	promoter	NA
-0.37051	1.94832	8.48609	0.00357871	0.197648	rDPI_19566	chr16	30775465	30775475	chr16:30775465..30775475,chr16:30775439..30775582,+;peak:chr16:30775467..30775468,+;peakCounts:714.6	1628	+	30775467	ENST00000602784.1	ENSG00000103549.22	enhancer	RNF40
0.359179	3.9072	8.48504	0.00358078	0.197648	rDPI_48388	chr7	108569661	108569673	chr7:108569661..108569673,chr7:108569525..108569772,-;peak:chr7:108569666..108569667,-;peakCounts:5095.8	7700	-	108569666	ENST00000489738.1	ENSG00000135241.17	promoter	PNPLA8
-0.606204	0.966627	8.48183	0.00358711	0.197729	rDPI_21644	chr17	36090140	36090144	chr17:36090140..36090144,-	980	-	36090143	ENST00000613922.2	ENSG00000277632.2	promoter	CCL3
0.931049	1.60021	8.48078	0.00358918	0.197729	rDPI_29469	chr2	119485712	119485725	chr2:119485712..119485725,chr2:119485629..119485758,+;peak:chr2:119485721..119485722,+;peakCounts:463.5	1057	+	119485721	ENST00000657643.1	ENSG00000231013.2	enhancer	SCTR-AS1
0.373983	2.84735	8.4797	0.00359132	0.197729	rDPI_1778	chr1	53945573	53945580	chr1:53945573..53945580,chr1:53945567..53945746,-;peak:chr1:53945573..53945574,-;peakCounts:5228.1	7594	-	53945573	ENST00000371378.6	ENSG00000081870.12	alternative	HSPB11
-0.592494	4.56398	8.47681	0.00359703	0.197735	rDPI_27793	chr2	20447071	20447076	chr2:20447071..20447076,chr2:20447045..20447813,+;peak:chr2:20447074..20447075,+;peakCounts:10284.3	16100	+	20447074	ENST00000272233.6	ENSG00000143878.10	promoter	RHOB
-0.356571	1.15645	8.47658	0.00359749	0.197735	rDPI_2794	chr1	119047383	119047406	chr1:119047383..119047406,+	335	+	119047405	ENST00000423984.2	ENSG00000224238.2	promoter	NA
0.465237	1.78009	8.47142	0.00360769	0.198129	rDPI_33616	chr20	46021671	46021721	chr20:46021671..46021721,+	1105	+	46021683	ENST00000454036.6	ENSG00000124140.14	promoter	SLC12A5
-0.943722	1.74862	8.46855	0.00361339	0.198275	rDPI_34818	chr22	22357748	22357750	chr22:22357748..22357750,+	1097	+	22357749	ENST00000390294.2	ENSG00000211648.2	promoter	IGLV1-47
-0.498489	6.447	8.46611	0.00361824	0.198374	rDPI_50059	chr8	58553261	58553263	chr8:58553261..58553263,chr8:58553164..58553290,+;peak:chr8:58553262..58553263,+;peakCounts:32798.7	55950	+	58553262	ENST00000519115.5	ENSG00000137575.12	promoter	SDCBP
-0.656893	2.50492	8.46285	0.00362473	0.198561	rDPI_2997	chr1	150235763	150235780	chr1:150235763..150235780,chr1:150235726..150235808,+;peak:chr1:150235763..150235764,+;peakCounts:375.3	1852	+	150235763	ENST00000410290.1	ENSG00000222222.1	enhancer	RNU2-17P
0.495817	1.66852	8.4609	0.00362862	0.198561	rDPI_41568	chr5	38595404	38595407	chr5:38595404..38595407,-	814	-	38595405	ENST00000263409.8	ENSG00000113594.10	promoter	LIFR
-0.631734	2.7375	8.45982	0.00363077	0.198561	rDPI_28577	chr2	64144396	64144402	chr2:64144396..64144402,chr2:64144298..64144462,-;peak:chr2:64144396..64144397,-;peakCounts:2528.8	3681	-	64144396	ENST00000468869.2	ENSG00000197329.12	alternative	PELI1
-0.357882	3.0913	8.45669	0.00363703	0.198737	rDPI_17972	chr15	72783736	72783761	chr15:72783736..72783761,chr15:72783691..72783791,-;peak:chr15:72783749..72783750,-;peakCounts:1325.7	4883	-	72783749	ENST00000567941.5	ENSG00000159322.17	promoter	ADPGK
0.597011	1.69773	8.45412	0.00364217	0.198759	rDPI_3005	chr1	150257899	150257911	chr1:150257899..150257911,chr1:150257774..150257953,+;peak:chr1:150257904..150257905,+;peakCounts:379.2	921	+	150257904	ENST00000607652.5	ENSG00000118298.12	alternative	CA14
-0.930071	6.90385	8.45345	0.00364351	0.198759	rDPI_37361	chr3	81761638	81761648	chr3:81761638..81761648,chr3:81761420..81761866,-;peak:chr3:81761646..81761647,-;peakCounts:28351.8	74411	-	81761646	ENST00000429644.7	ENSG00000114480.13	promoter	GBE1
-0.41976	1.74537	8.45157	0.00364729	0.198799	rDPI_43111	chr5	145936593	145936602	chr5:145936593..145936602,chr5:145936530..145936652,+;peak:chr5:145936597..145936598,+;peakCounts:649.3	1206	+	145936597	ENST00000359120.9	ENSG00000156463.18	alternative	SH3RF2
0.30492	5.48838	8.44612	0.00365823	0.199184	rDPI_11544	chr12	42326109	42326119	chr12:42326109..42326119,chr12:42325986..42326150,-;peak:chr12:42326114..42326115,-;peakCounts:15808.5	26522	-	42326114	ENST00000676501.1	ENSG00000139168.9	promoter	ZCRB1
-0.740619	1.02418	8.44501	0.00366047	0.199184	rDPI_21824	chr17	40023585	40023589	chr17:40023585..40023589,-	290	-	40023586	ENST00000492176.2	ENSG00000008838.20	promoter	MED24
-0.587487	1.79934	8.44283	0.00366485	0.199257	rDPI_5226	chr1	236739383	236739410	chr1:236739383..236739410,chr1:236739296..236739531,+;peak:chr1:236739399..236739400,+;peakCounts:244.8	1595	+	236739399	ENST00000494762.1	ENSG00000077522.14	alternative	ACTN2
0.612643	1.84446	8.43735	0.00367591	0.199692	rDPI_44263	chr6	25652209	25652230	chr6:25652209..25652230,chr6:25652202..25652361,+;peak:chr6:25652225..25652226,+;peakCounts:254.7	1191	+	25652225	ENST00000377961.3	ENSG00000079689.14	promoter	SCGN
0.274141	5.82574	8.4331	0.00368452	0.199815	rDPI_54657	chrX	119574558	119574569	chrX:119574558..119574569,chrX:119574453..119574786,+;peak:chrX:119574563..119574564,+;peakCounts:18975.6	37035	+	119574563	ENST00000371558.7	ENSG00000077721.16	promoter	UBE2A
-0.76248	2.55894	8.43301	0.0036847	0.199815	rDPI_8400	chr11	19186219	19186240	chr11:19186219..19186240,chr11:19186219..19186358,-;peak:chr11:19186225..19186226,-;peakCounts:509.4	2040	-	19186225	ENST00000647990.1	ENSG00000129170.10	alternative	CSRP3
0.770691	2.89687	8.4317	0.00368735	0.199815	rDPI_43157	chr5	148452907	148452926	chr5:148452907..148452926,chr5:148452697..148453154,+;peak:chr5:148452920..148452921,+;peakCounts:846.6	3227	+	148452920	ENST00000508176.1	ENSG00000145868.17	enhancer	FBXO38
0.713644	6.8142	8.42814	0.00369457	0.20004	rDPI_9332	chr11	65111827	65111928	chr11:65111827..65111928,chr11:65111827..65111928,+	105927	+	65111872	ENST00000526809.5	ENSG00000149809.17	promoter	TM7SF2
0.595061	4.65305	8.4221	0.00370687	0.200539	rDPI_13854	chr13	29428779	29428794	chr13:29428779..29428794,chr13:29428584..29428898,+;peak:chr13:29428784..29428785,+;peakCounts:5445	19266	+	29428784	ENST00000542829.1	ENSG00000132938.22	promoter	MTUS2
0.578324	1.65495	8.42012	0.00371091	0.200592	rDPI_16862	chr15	26773083	26773087	chr15:26773083..26773087,chr15:26772997..26773152,-;peak:chr15:26773086..26773087,-;peakCounts:422.8	746	-	26773086	ENST00000622697.4	ENSG00000166206.15	alternative	GABRB3
-0.331258	3.13429	8.41839	0.00371444	0.200617	rDPI_18860	chr16	2883239	2883258	chr16:2883239..2883258,chr16:2883152..2883353,+;peak:chr16:2883244..2883245,+;peakCounts:1074.9	4835	+	2883244	ENST00000572006.1	ENSG00000162076.13	alternative	FLYWCH2
-0.841704	4.63543	8.41383	0.00372378	0.20074	rDPI_27597	chr2	1744509	1744520	chr2:1744509..1744520,chr2:1744461..1744581,-;peak:chr2:1744515..1744516,-;peakCounts:3899.7	8764	-	1744515	ENST00000252804.9	ENSG00000130508.11	promoter	PXDN
-1.06766	3.52634	8.41294	0.00372559	0.20074	rDPI_5538	chr10	6202932	6202934	chr10:6202932..6202934,chr10:6202904..6202986,+;peak:chr10:6202932..6202933,+;peakCounts:10373.4	12435	+	6202932	ENST00000379775.9	ENSG00000170525.21	promoter	PFKFB3
-0.606993	1.81641	8.41277	0.00372594	0.20074	rDPI_10372	chr11	117203421	117203435	chr11:117203421..117203435,chr11:117203304..117203507,+;peak:chr11:117203427..117203428,+;peakCounts:314.6	1021	+	117203427	ENST00000529622.1	ENSG00000149591.17	alternative	TAGLN
0.52958	1.82392	8.40167	0.00374876	0.201802	rDPI_49056	chr7	149874030	149874031	chr7:149874030..149874031,chr7:149873911..149874067,+;peak:chr7:149874030..149874031,+;peakCounts:248.9	1426	+	149874030	ENST00000425642.2	ENSG00000171130.18	alternative	ATP6V0E2
0.348104	1.88068	8.39321	0.00376625	0.202395	rDPI_16930	chr15	34337734	34337754	chr15:34337734..34337754,chr15:34337685..34337786,-;peak:chr15:34337739..34337740,-;peakCounts:307.8	944	-	34337739	ENST00000559484.1	ENSG00000140199.13	alternative	SLC12A6
0.469821	4.59854	8.39168	0.00376943	0.202395	rDPI_19749	chr16	53502975	53502991	chr16:53502975..53502991,chr16:53502917..53503068,-;peak:chr16:53502984..53502985,-;peakCounts:4295.7	10766	-	53502984	ENST00000566045.5	ENSG00000166971.17	alternative	AKTIP
0.468828	1.54367	8.39089	0.00377106	0.202395	rDPI_46393	chr6	154510863	154510879	chr6:154510863..154510879,chr6:154510740..154510884,+;peak:chr6:154510875..154510876,+;peakCounts:238.6	888	+	154510875	ENST00000658375.1	ENSG00000287260.1	promoter	LOC101928868
-0.397035	2.30316	8.38986	0.0037732	0.202395	rDPI_41708	chr5	52787966	52787977	chr5:52787966..52787977,chr5:52787831..52788392,+;peak:chr5:52787971..52787972,+;peakCounts:1269.7	1934	+	52787971	ENST00000506949.1	ENSG00000152684.11	alternative	PELO
-0.334757	2.66692	8.38765	0.00377778	0.202395	rDPI_44900	chr6	36027760	36027766	chr6:36027760..36027766,chr6:36027735..36027967,+;peak:chr6:36027760..36027761,+;peakCounts:1358.2	3991	+	36027760	ENST00000468133.5	ENSG00000112062.11	alternative	MAPK14
0.481816	0.987875	8.38603	0.00378116	0.202395	rDPI_40364	chr4	110637033	110637044	chr4:110637033..110637044,chr4:110636990..110637080,-;peak:chr4:110637038..110637039,-;peakCounts:97.2	140	-	110637038	ENST00000394595.8	ENSG00000164093.17	alternative	PITX2
0.936467	1.94806	8.38589	0.00378146	0.202395	rDPI_32671	chr2	242084179	242084190	chr2:242084179..242084190,chr2:242084118..242084227,-;peak:chr2:242084185..242084186,-;peakCounts:611.1	1275	-	242084185	ENST00000446593.1	ENSG00000232002.2	alternative	LINC01880
-0.452532	1.38137	8.382	0.00378955	0.202662	rDPI_19242	chr16	21820395	21820400	chr16:21820395..21820400,-	457	-	21820395	ENST00000551681.1	ENSG00000248124.8	promoter	NA
-0.435492	1.74206	8.3799	0.00379393	0.20273	rDPI_50936	chr8	143580653	143580673	chr8:143580653..143580673,chr8:143580558..143580732,-;peak:chr8:143580657..143580658,-;peakCounts:148.8	838	-	143580657	ENST00000529576.5	ENSG00000104529.17	alternative	EEF1D
-0.459574	1.43771	8.37705	0.00379989	0.202883	rDPI_23161	chr17	78187050	78187053	chr17:78187050..78187053,chr17:78186992..78187084,-;peak:chr17:78187051..78187052,-;peakCounts:311.4	507	-	78187051	ENST00000301634.12	ENSG00000167900.12	promoter	TK1
0.674518	3.36848	8.37098	0.00381261	0.203381	rDPI_21423	chr17	28370367	28370374	chr17:28370367..28370374,chr17:28370224..28370425,-;peak:chr17:28370373..28370374,-;peakCounts:2733.7	5765	-	28370373	ENST00000226218.9	ENSG00000109072.14	alternative	VTN
0.866492	3.15139	8.36962	0.00381545	0.203381	rDPI_43094	chr5	142745597	142745606	chr5:142745597..142745606,chr5:142745513..142745709,+;peak:chr5:142745600..142745601,+;peakCounts:2437.2	5119	+	142745600	ENST00000664609.1	ENSG00000236714.3	promoter	LINC01844
0.473158	3.53017	8.36643	0.00382216	0.203434	rDPI_41520	chr5	34929640	34929655	chr5:34929640..34929655,chr5:34929512..34929754,+;peak:chr5:34929646..34929647,+;peakCounts:3107.5	6406	+	34929646	ENST00000382021.2	ENSG00000168724.17	alternative	DNAJC21
0.52725	1.53712	8.36618	0.00382268	0.203434	rDPI_47469	chr7	55887797	55887798	chr7:55887797..55887798,+	549	+	55887797	ENST00000411863.2	ENSG00000178665.16	alternative	ZNF713
0.640768	6.1619	8.36095	0.0038337	0.203709	rDPI_3194	chr1	153627504	153627511	chr1:153627504..153627511,chr1:153627491..153627677,-;peak:chr1:153627504..153627505,-;peakCounts:66054.6	91256	-	153627504	ENST00000392623.5	ENSG00000189171.14	enhancer	S100A13
-0.468791	1.89082	8.36077	0.00383409	0.203709	rDPI_36040	chr3	14540356	14540361	chr3:14540356..14540361,chr3:14540269..14540446,-;peak:chr3:14540358..14540359,-;peakCounts:661.5	1215	-	14540358	ENST00000413414.1	ENSG00000144596.13	alternative	GRIP2
-1.27374	3.02806	8.35704	0.00384196	0.203961	rDPI_16772	chr14	106062676	106062684	chr14:106062676..106062684,-	3886	-	106062683	ENST00000390598.2	ENSG00000211938.2	promoter	IGHV3-7
0.358301	2.17388	8.35513	0.00384599	0.204009	rDPI_36739	chr3	48473189	48473197	chr3:48473189..48473197,chr3:48473024..48473234,-;peak:chr3:48473191..48473192,-;peakCounts:556.8	1619	-	48473191	ENST00000426002.5	ENSG00000164054.15	alternative	SHISA5
0.341925	1.25071	8.35142	0.00385385	0.20426	rDPI_17497	chr15	55289834	55289838	chr15:55289834..55289838,chr15:55289717..55289865,-;peak:chr15:55289837..55289838,-;peakCounts:122.4	312	-	55289837	ENST00000336787.6	ENSG00000069974.16	alternative	RAB27A
-0.851541	3.52997	8.34835	0.00386037	0.20444	rDPI_8414	chr11	19192421	19192450	chr11:19192421..19192450,chr11:19192333..19192481,-;peak:chr11:19192426..19192427,-;peakCounts:1125.9	4587	-	19192426	ENST00000647990.1	ENSG00000129170.10	alternative	CSRP3
0.380688	3.37303	8.34479	0.00386794	0.204603	rDPI_19438	chr16	29995612	29995615	chr16:29995612..29995615,chr16:29995606..29995696,-;peak:chr16:29995612..29995613,-;peakCounts:4367.7	5024	-	29995612	ENST00000279392.8	ENSG00000149929.16	promoter	HIRIP3
0.306837	7.20462	8.34396	0.00386972	0.204603	rDPI_17286	chr15	43800608	43800616	chr15:43800608..43800616,chr15:43800552..43800754,+;peak:chr15:43800614..43800615,+;peakCounts:46470.6	98470	+	43800614	ENST00000458412.2	ENSG00000242028.8	promoter	HYPK
0.396836	1.14544	8.33714	0.00388427	0.204876	rDPI_54507	chrX	103586725	103586736	chrX:103586725..103586736,chrX:103586647..103587107,+;peak:chrX:103586730..103586731,+;peakCounts:98.7	321	+	103586730	ENST00000469586.1	ENSG00000133142.18	alternative	TCEAL4
0.471571	2.88066	8.33691	0.00388476	0.204876	rDPI_597	chr1	16073638	16073652	chr1:16073638..16073652,chr1:16073601..16073683,-;peak:chr1:16073651..16073652,-;peakCounts:1052.1	2617	-	16073651	ENST00000375662.5	ENSG00000185519.9	promoter	FAM131C
0.384152	2.79483	8.3358	0.00388715	0.204876	rDPI_19142	chr16	15434496	15434498	chr16:15434496..15434498,chr16:15434468..15434624,+;peak:chr16:15434497..15434498,+;peakCounts:2994.2	4255	+	15434497	ENST00000566490.5	ENSG00000166780.11	alternative	BMERB1
-0.644811	1.58845	8.33567	0.00388742	0.204876	rDPI_44628	chr6	31829831	31829853	chr6:31829831..31829853,chr6:31829736..31830135,+;peak:chr6:31829841..31829842,+;peakCounts:197.7	1285	+	31829841	ENST00000649802.1	ENSG00000285565.1	alternative	NA
-0.339094	1.88893	8.33371	0.0038916	0.204931	rDPI_26948	chr19	49157770	49157777	chr19:49157770..49157777,chr19:49157737..49157861,+;peak:chr19:49157773..49157774,+;peakCounts:293	1461	+	49157773	ENST00000598697.5	ENSG00000130529.16	alternative	TRPM4
0.554998	1.15946	8.32895	0.00390182	0.205069	rDPI_35231	chr22	36329372	36329383	chr22:36329372..36329383,chr22:36329345..36329405,-;peak:chr22:36329377..36329378,-;peakCounts:110.7	164	-	36329377	ENST00000463027.1	ENSG00000100345.22	enhancer	MYH9
0.39818	4.68793	8.32704	0.00390593	0.205069	rDPI_36428	chr3	40309720	40309733	chr3:40309720..40309733,chr3:40309679..40309974,+;peak:chr3:40309725..40309726,+;peakCounts:702.1	14093	+	40309725	ENST00000462088.1	ENSG00000114784.4	alternative	EIF1B
0.382247	1.54466	8.32657	0.00390694	0.205069	rDPI_10154	chr11	107591225	107591236	chr11:107591225..107591236,chr11:107591200..107591353,+;peak:chr11:107591230..107591231,+;peakCounts:217.8	725	+	107591230	ENST00000443271.2	ENSG00000110675.13	alternative	ELMOD1
-0.41815	1.79968	8.32504	0.00391023	0.205069	rDPI_41584	chr5	39425153	39425164	chr5:39425153..39425164,chr5:39424839..39425231,-;peak:chr5:39425158..39425159,-;peakCounts:111.9	1059	-	39425158	ENST00000545653.5	ENSG00000153071.15	alternative	DAB2
-0.439049	0.860049	8.32405	0.00391236	0.205069	rDPI_21822	chr17	40015586	40015654	chr17:40015586..40015654,chr17:40015586..40015654,+	168	+	40015646	ENST00000577675.1	ENSG00000108342.13	alternative	CSF3
0.289453	3.38801	8.32166	0.0039175	0.205069	rDPI_27184	chr19	53254852	53254874	chr19:53254852..53254874,chr19:53254786..53254940,-;peak:chr19:53254861..53254862,-;peakCounts:1716.3	6384	-	53254861	ENST00000598513.6	ENSG00000197928.11	promoter	ZNF677
-0.53604	2.19001	8.3215	0.00391786	0.205069	rDPI_17330	chr15	44717797	44717824	chr15:44717797..44717824,chr15:44717602..44717847,+;peak:chr15:44717818..44717819,+;peakCounts:424.1	1431	+	44717818	ENST00000623550.1	ENSG00000166710.21	alternative	B2M
0.383397	3.89745	8.32015	0.00392077	0.205069	rDPI_9472	chr11	65872814	65872851	chr11:65872814..65872851,chr11:65872577..65872998,-;peak:chr11:65872842..65872843,-;peakCounts:2935.7	10806	-	65872842	ENST00000531972.5	ENSG00000172638.13	alternative	EFEMP2
0.446073	1.22074	8.31935	0.0039225	0.205069	rDPI_49550	chr8	22232074	22232106	chr8:22232074..22232106,chr8:22232013..22232135,-;peak:chr8:22232099..22232100,-;peakCounts:50.8	326	-	22232099	ENST00000454243.7	ENSG00000168490.14	promoter	PHYHIP
-0.40585	1.38311	8.31103	0.00394051	0.205629	rDPI_41588	chr5	40679932	40679933	chr5:40679932..40679933,chr5:40679894..40679985,+;peak:chr5:40679932..40679933,+;peakCounts:143.6	637	+	40679932	ENST00000514343.1	ENSG00000171522.6	alternative	PTGER4
0.349424	4.85013	8.31027	0.00394215	0.205629	rDPI_12758	chr12	102062003	102062022	chr12:102062003..102062022,chr12:102061953..102062134,-;peak:chr12:102062012..102062013,-;peakCounts:3935.7	14313	-	102062012	ENST00000500685.6	ENSG00000120860.11	promoter	WASHC3
-0.649341	1.97927	8.31004	0.00394266	0.205629	rDPI_3718	chr1	163069361	163069363	chr1:163069361..163069363,+	1521	+	163069361	ENST00000531057.5	ENSG00000117152.14	promoter	RGS4
0.332854	3.58805	8.30792	0.00394726	0.205705	rDPI_8372	chr11	18526932	18526936	chr11:18526932..18526936,chr11:18526783..18526972,-;peak:chr11:18526934..18526935,-;peakCounts:4015.2	5428	-	18526934	ENST00000251968.4	ENSG00000074319.13	alternative	TSG101
-0.342808	1.26603	8.3049	0.00395383	0.205883	rDPI_39409	chr4	37890692	37890698	chr4:37890692..37890698,chr4:37890588..37890714,+;peak:chr4:37890697..37890698,+;peakCounts:141.3	441	+	37890697	ENST00000261439.9	ENSG00000065882.16	alternative	TBC1D1
-0.656084	5.63351	8.29929	0.00396605	0.206355	rDPI_27885	chr2	26244961	26244969	chr2:26244961..26244969,chr2:26244713..26245071,+;peak:chr2:26244968..26244969,+;peakCounts:15496	61484	+	26244968	ENST00000425035.5	ENSG00000138029.14	alternative	HADHB
0.324097	1.46311	8.29778	0.00396935	0.206362	rDPI_47781	chr7	79453844	79453848	chr7:79453844..79453848,chr7:79453808..79454146,+;peak:chr7:79453844..79453845,+;peakCounts:371.9	831	+	79453844	ENST00000669576.1	ENSG00000234456.8	alternative	MAGI2-AS3
0.361886	5.00878	8.29237	0.0039812	0.206734	rDPI_26323	chr19	40348378	40348403	chr19:40348378..40348403,chr19:40348324..40348457,-;peak:chr19:40348397..40348398,-;peakCounts:3016.8	17161	-	40348397	ENST00000392035.6	ENSG00000160392.13	promoter	C19orf47
-0.379447	2.31452	8.29162	0.00398284	0.206734	rDPI_12732	chr12	101280119	101280124	chr12:101280119..101280124,chr12:101280080..101280206,+;peak:chr12:101280121..101280122,+;peakCounts:1948.3	2365	+	101280121	ENST00000551825.1	ENSG00000120800.5	alternative	UTP20
0.393976	1.69552	8.28684	0.00399334	0.207114	rDPI_3883	chr1	170730190	170730204	chr1:170730190..170730204,chr1:170730155..170730212,+;peak:chr1:170730197..170730198,+;peakCounts:256.5	929	+	170730197	ENST00000485529.5	ENSG00000116132.12	promoter	PRRX1
0.543627	3.5607	8.28156	0.00400496	0.207379	rDPI_9289	chr11	64744815	64744830	chr11:64744815..64744830,chr11:64744771..64744902,-;peak:chr11:64744826..64744827,-;peakCounts:1570.5	5795	-	64744826	ENST00000441258.5	ENSG00000068831.19	promoter	RASGRP2
0.307692	5.22589	8.28002	0.00400837	0.207379	rDPI_39993	chr4	86935007	86935021	chr4:86935007..86935021,chr4:86934930..86935265,+;peak:chr4:86935011..86935012,+;peakCounts:12381.3	23796	+	86935011	ENST00000507468.5	ENSG00000172493.22	promoter	AFF1
-0.570683	3.6557	8.27903	0.00401055	0.207379	rDPI_51781	chr9	70413924	70413942	chr9:70413924..70413942,chr9:70413763..70414174,-;peak:chr9:70413932..70413933,-;peakCounts:1030.3	6551	-	70413932	ENST00000377126.3	ENSG00000119138.4	alternative	KLF9
-0.582277	2.18381	8.27876	0.00401115	0.207379	rDPI_8399	chr11	19185025	19185040	chr11:19185025..19185040,chr11:19184950..19185050,-;peak:chr11:19185031..19185032,-;peakCounts:261.2	964	-	19185031	ENST00000647990.1	ENSG00000129170.10	alternative	CSRP3
-0.370106	1.55519	8.26987	0.00403084	0.208179	rDPI_17033	chr15	38252082	38252093	chr15:38252082..38252093,chr15:38252042..38252187,+;peak:chr15:38252084..38252085,+;peakCounts:472.5	1138	+	38252084	ENST00000299084.9	ENSG00000166068.13	enhancer	SPRED1
0.382326	2.07065	8.2689	0.00403299	0.208179	rDPI_47083	chr7	28180769	28180786	chr7:28180769..28180786,chr7:28180729..28180822,-;peak:chr7:28180772..28180773,-;peakCounts:335.7	1479	-	28180772	ENST00000283928.10	ENSG00000153814.13	alternative	JAZF1
0.363785	1.34312	8.26261	0.00404698	0.208736	rDPI_26143	chr19	38253083	38253089	chr19:38253083..38253089,chr19:38253081..38253133,-;peak:chr19:38253083..38253084,-;peakCounts:391.5	440	-	38253083	ENST00000587515.5	ENSG00000167641.11	alternative	PPP1R14A
-0.772169	2.82415	8.26108	0.0040504	0.208747	rDPI_34277	chr21	29193453	29193463	chr21:29193453..29193463,chr21:29193375..29193491,+;peak:chr21:29193460..29193461,+;peakCounts:1728.9	3256	+	29193460	ENST00000447125.5	ENSG00000215533.8	promoter	LINC00189
-0.452646	2.02807	8.25786	0.00405759	0.208953	rDPI_16449	chr14	95319895	95319914	chr14:95319895..95319914,chr14:95319780..95319944,-;peak:chr14:95319906..95319907,-;peakCounts:245.1	1300	-	95319906	ENST00000298912.9	ENSG00000165959.12	alternative	CLMN
0.331409	5.58136	8.2484	0.00407879	0.209823	rDPI_18856	chr16	2777290	2777294	chr16:2777290..2777294,chr16:2777019..2777336,-;peak:chr16:2777293..2777294,-;peakCounts:14070.2	25236	-	2777293	ENST00000409906.9	ENSG00000103363.15	alternative	ELOB
0.375243	4.22575	8.24746	0.0040809	0.209823	rDPI_21680	chr17	38297168	38297174	chr17:38297168..38297174,chr17:38297120..38297185,+;peak:chr17:38297173..38297174,+;peakCounts:8956.8	12924	+	38297173	ENST00000613675.5	ENSG00000278845.5	promoter	MRPL45
-0.373803	1.21961	8.24299	0.00409097	0.210175	chr13:50715466-50715722	chr13	50715466	50715722	chr13:50715466-50715722	64	.	50715569	ENST00000650996.1	ENSG00000176124.15	promoter	DLEU1
-0.608443	1.39243	8.24047	0.00409666	0.210302	rDPI_22795	chr17	67996446	67996459	chr17:67996446..67996459,chr17:67996433..67996519,-;peak:chr17:67996451..67996452,-;peakCounts:270.9	587	-	67996451	ENST00000580729.3	ENSG00000186665.10	promoter	C17orf58
0.458757	2.72877	8.23663	0.00410532	0.210475	rDPI_42893	chr5	138439048	138439079	chr5:138439048..138439079,chr5:138438937..138439152,+;peak:chr5:138439057..138439058,+;peakCounts:641.7	3193	+	138439057	ENST00000378339.7	ENSG00000132563.16	promoter	REEP2
-0.435463	2.95774	8.23612	0.00410648	0.210475	rDPI_18187	chr15	78811452	78811472	chr15:78811452..78811472,chr15:78811332..78811525,-;peak:chr15:78811460..78811461,-;peakCounts:843.9	3101	-	78811460	ENST00000388820.5	ENSG00000136378.15	alternative	ADAMTS7
0.586888	9.26869	8.23183	0.0041162	0.210661	rDPI_43304	chr5	151020591	151020592	chr5:151020591..151020592,chr5:151020418..151020738,+;peak:chr5:151020591..151020592,+;peakCounts:372384.9	413761	+	151020591	ENST00000388825.9	ENSG00000211445.12	promoter	GPX3
0.397091	1.17944	8.2313	0.0041174	0.210661	rDPI_9331	chr11	65110522	65110530	chr11:65110522..65110530,chr11:65110487..65110549,+;peak:chr11:65110524..65110525,+;peakCounts:179.2	451	+	65110524	ENST00000530673.1	ENSG00000149823.9	alternative	VPS51
-0.629553	1.84152	8.23025	0.00411978	0.210661	rDPI_8405	chr11	19188157	19188167	chr11:19188157..19188167,chr11:19188146..19188308,-;peak:chr11:19188162..19188163,-;peakCounts:214.1	892	-	19188162	ENST00000647990.1	ENSG00000129170.10	alternative	CSRP3
-0.320249	1.91315	8.22443	0.00413303	0.210943	rDPI_12370	chr12	67269599	67269610	chr12:67269599..67269610,chr12:67269281..67269722,+;peak:chr12:67269604..67269605,+;peakCounts:320	1164	+	67269604	ENST00000539109.1	ENSG00000111530.13	enhancer	CAND1
0.359902	4.45346	8.22403	0.00413392	0.210943	rDPI_26993	chr19	49580555	49580556	chr19:49580555..49580556,chr19:49580524..49580638,-;peak:chr19:49580555..49580556,-;peakCounts:8595	9550	-	49580555	ENST00000596358.6	ENSG00000142546.14	promoter	NOSIP
0.358544	5.05864	8.22345	0.00413524	0.210943	rDPI_39994	chr4	86935044	86935054	chr4:86935044..86935054,chr4:86934930..86935265,+;peak:chr4:86935048..86935049,+;peakCounts:12723.3	18584	+	86935048	ENST00000503477.5	ENSG00000172493.22	alternative	AFF1
0.798452	3.18561	8.22214	0.00413823	0.210943	rDPI_51838	chr9	76906100	76906124	chr9:76906100..76906124,chr9:76906052..76906203,-;peak:chr9:76906107..76906108,-;peakCounts:1025.1	3267	-	76906107	ENST00000376718.8	ENSG00000106772.18	promoter	PRUNE2
-0.305157	1.78219	8.21772	0.00414833	0.211293	rDPI_48079	chr7	99374246	99374269	chr7:99374246..99374269,chr7:99374239..99374293,+;peak:chr7:99374259..99374260,+;peakCounts:425.7	1465	+	99374259	ENST00000443222.6	ENSG00000130429.15	promoter	ARPC1B
0.365116	1.38719	8.21507	0.00415438	0.211436	rDPI_27439	chr19	57363504	57363506	chr19:57363504..57363506,chr19:57363387..57363658,+;peak:chr19:57363505..57363506,+;peakCounts:313.1	671	+	57363505	ENST00000595335.5	ENSG00000152433.15	alternative	ZNF547
-0.378232	1.27127	8.21253	0.00416022	0.211569	rDPI_37288	chr3	69386363	69386373	chr3:69386363..69386373,chr3:69386001..69386424,-;peak:chr3:69386368..69386369,-;peakCounts:123.1	470	-	69386368	ENST00000473188.5	ENSG00000114541.15	alternative	FRMD4B
-0.442335	0.908014	8.20973	0.00416664	0.21173	rDPI_38876	chr3	194578330	194578335	chr3:194578330..194578335,+	176	+	194578330	ENST00000666676.1	ENSG00000231770.6	enhancer	NA
-0.688142	1.36378	8.20729	0.00417225	0.21185	rDPI_16786	chr14	106470794	106470801	chr14:106470794..106470801,-	421	-	106470800	ENST00000434710.1	ENSG00000232216.1	promoter	IGHV3-43
0.838569	4.94815	8.20525	0.00417694	0.211924	rDPI_43959	chr6	4347144	4347154	chr6:4347144..4347154,chr6:4346940..4347224,-;peak:chr6:4347148..4347149,-;peakCounts:10498.5	18703	-	4347148	ENST00000671548.1	ENSG00000231811.3	promoter	LOC101927888
0.396092	2.40319	8.20184	0.00418478	0.212157	rDPI_8628	chr11	45181036	45181046	chr11:45181036..45181046,chr11:45180968..45181144,+;peak:chr11:45181036..45181037,+;peakCounts:2021.4	3233	+	45181036	ENST00000534751.2	ENSG00000019485.13	enhancer	PRDM11
-0.467475	1.58579	8.19642	0.00419731	0.212627	rDPI_13592	chr12	124913662	124913677	chr12:124913662..124913677,chr12:124913450..124913775,-;peak:chr12:124913667..124913668,-;peakCounts:204.5	607	-	124913667	ENST00000544481.1	ENSG00000150991.15	alternative	UBC
0.415059	1.03751	8.19453	0.0042017	0.212684	rDPI_4826	chr1	222658318	222658361	chr1:222658318..222658361,+	118	+	222658329	ENST00000476400.1	ENSG00000154305.18	enhancer	MIA3
-0.531333	2.94512	8.19031	0.00421148	0.212963	rDPI_19358	chr16	28610002	28610009	chr16:28610002..28610009,chr16:28609951..28610085,-;peak:chr16:28610002..28610003,-;peakCounts:1372.5	3243	-	28610002	ENST00000314752.11	ENSG00000196502.12	promoter	SULT1A1
-0.371559	3.21138	8.18934	0.00421374	0.212963	rDPI_21253	chr17	17237164	17237173	chr17:17237164..17237173,chr17:17237103..17237215,-;peak:chr17:17237168..17237169,-;peakCounts:2048.4	4659	-	17237168	ENST00000285071.9	ENSG00000154803.13	promoter	FLCN
0.385243	3.3649	8.18635	0.00422068	0.21303	rDPI_10079	chr11	95790492	95790502	chr11:95790492..95790502,chr11:95790455..95790595,+;peak:chr11:95790495..95790496,+;peakCounts:1239.2	5080	+	95790495	ENST00000538095.1	ENSG00000166037.11	alternative	CEP57
0.562318	1.56759	8.1846	0.00422476	0.21303	rDPI_17467	chr15	51924414	51924419	chr15:51924414..51924419,chr15:51924334..51924464,+;peak:chr15:51924418..51924419,+;peakCounts:680.3	921	+	51924418	ENST00000558666.1	ENSG00000138594.14	alternative	TMOD3
0.407149	3.91416	8.1839	0.00422639	0.21303	rDPI_24130	chr18	58629021	58629032	chr18:58629021..58629032,chr18:58628781..58629162,-;peak:chr18:58629026..58629027,-;peakCounts:2810.9	7703	-	58629026	ENST00000361673.4	ENSG00000198796.7	promoter	ALPK2
-0.39537	1.31769	8.18316	0.00422811	0.21303	rDPI_45425	chr6	73452276	73452283	chr6:73452276..73452283,chr6:73452245..73452357,-;peak:chr6:73452276..73452277,-;peakCounts:365.4	504	-	73452276	ENST00000370315.4	ENSG00000164430.17	alternative	CGAS
-0.692853	3.68435	8.18025	0.0042349	0.213208	rDPI_17685	chr15	63061770	63061787	chr15:63061770..63061787,chr15:63061710..63061790,+;peak:chr15:63061775..63061776,+;peakCounts:1584.9	6145	+	63061775	ENST00000558072.5	ENSG00000140416.23	enhancer	TPM1
-0.530861	1.61738	8.17729	0.00424182	0.213392	rDPI_33908	chr20	62303565	62303704	chr20:62303565..62303704,chr20:62303565..62303704,+	751	+	62303653	ENST00000462554.2	ENSG00000130706.13	enhancer	ADRM1
-0.527291	3.42529	8.17287	0.00425217	0.213747	rDPI_25498	chr19	16324827	16324829	chr19:16324827..16324829,chr19:16324758..16324976,+;peak:chr19:16324828..16324829,+;peakCounts:3630.6	4132	+	16324828	ENST00000248071.6	ENSG00000127528.6	promoter	KLF2
-0.357413	2.66563	8.17141	0.00425558	0.213754	rDPI_44150	chr6	16238656	16238666	chr6:16238656..16238666,chr6:16238454..16238757,+;peak:chr6:16238661..16238662,+;peakCounts:1059.4	3370	+	16238661	ENST00000259727.5	ENSG00000137198.10	alternative	GMPR
0.298035	4.72365	8.1654	0.0042697	0.2141	rDPI_32655	chr2	241637057	241637098	chr2:241637057..241637098,chr2:241636967..241637339,-;peak:chr2:241637080..241637081,-;peakCounts:3082.5	12989	-	241637080	ENST00000407315.6	ENSG00000176946.12	promoter	THAP4
-0.298405	1.72891	8.16365	0.00427382	0.2141	rDPI_53268	chr9	137578871	137578878	chr9:137578871..137578878,chr9:137578830..137578937,-;peak:chr9:137578874..137578875,-;peakCounts:723.6	992	-	137578874	ENST00000476303.1	ENSG00000148399.13	alternative	DPH7
-0.487786	2.86559	8.16208	0.00427753	0.2141	rDPI_46183	chr6	141403296	141403322	chr6:141403296..141403322,chr6:141403270..141403492,+;peak:chr6:141403313..141403314,+;peakCounts:1251.9	4066	+	141403313	ENST00000667537.1	ENSG00000286452.1	promoter	NA
-0.413872	1.41983	8.16179	0.00427822	0.2141	rDPI_8413	chr11	19192383	19192392	chr11:19192383..19192392,chr11:19192333..19192481,-;peak:chr11:19192387..19192388,-;peakCounts:78.9	410	-	19192387	ENST00000647990.1	ENSG00000129170.10	alternative	CSRP3
-0.709032	3.32333	8.16088	0.00428036	0.2141	rDPI_32036	chr2	216633457	216633466	chr2:216633457..216633466,chr2:216633340..216633960,+;peak:chr2:216633461..216633462,+;peakCounts:3098	5941	+	216633461	ENST00000490362.1	ENSG00000115457.10	alternative	IGFBP2
0.637564	1.89325	8.16013	0.00428212	0.2141	rDPI_48597	chr7	128323945	128323952	chr7:128323945..128323952,-	1095	-	128323949	ENST00000481788.1	ENSG00000106344.8	alternative	RBM28
0.476814	1.60266	8.15406	0.00429648	0.214645	rDPI_22866	chr17	69485362	69485371	chr17:69485362..69485371,chr17:69485325..69485541,-;peak:chr17:69485365..69485366,-;peakCounts:340.2	650	-	69485365	ENST00000585537.1	ENSG00000267653.1	enhancer	NA
0.523577	1.63725	8.15274	0.00429961	0.214645	rDPI_43095	chr5	142745609	142745620	chr5:142745609..142745620,chr5:142745513..142745709,+;peak:chr5:142745614..142745615,+;peakCounts:357.2	886	+	142745614	ENST00000659596.1	ENSG00000236714.3	alternative	LINC01844
-0.362138	2.5976	8.14831	0.00431012	0.214903	rDPI_28806	chr2	71068647	71068652	chr2:71068647..71068652,chr2:71068544..71068712,+;peak:chr2:71068649..71068650,+;peakCounts:865.2	3577	+	71068649	ENST00000450272.5	ENSG00000124357.13	alternative	NAGK
0.310775	2.00568	8.14638	0.00431473	0.214903	rDPI_9024	chr11	61816986	61816992	chr11:61816986..61816992,chr11:61816767..61817091,-;peak:chr11:61816991..61816992,-;peakCounts:212.5	1628	-	61816991	ENST00000350997.12	ENSG00000149485.19	alternative	FADS1
-0.408563	3.05892	8.14531	0.00431726	0.214903	rDPI_39155	chr4	3463306	3463330	chr4:3463306..3463330,chr4:3463218..3463440,+;peak:chr4:3463316..3463317,+;peakCounts:836.1	4455	+	3463316	ENST00000340083.6	ENSG00000175920.18	promoter	DOK7
0.819135	1.48539	8.14503	0.00431794	0.214903	rDPI_40764	chr4	150581922	150581937	chr4:150581922..150581937,chr4:150581891..150581979,+;peak:chr4:150581922..150581923,+;peakCounts:352.8	860	+	150581922	ENST00000317605.6	ENSG00000181541.6	promoter	MAB21L2
-0.399026	1.41739	8.1426	0.00432372	0.215027	rDPI_39041	chr4	689151	689157	chr4:689151..689157,chr4:689149..689318,-;peak:chr4:689151..689152,-;peakCounts:630	716	-	689151	ENST00000322224.9	ENSG00000169026.13	alternative	SLC49A3
-0.552907	2.86101	8.13979	0.00433042	0.215113	rDPI_1123	chr1	31365884	31365897	chr1:31365884..31365897,chr1:31365732..31365947,-;peak:chr1:31365890..31365891,-;peakCounts:644.5	1948	-	31365890	ENST00000497275.5	ENSG00000121769.8	alternative	FABP3
0.381779	1.92941	8.13911	0.00433205	0.215113	rDPI_10232	chr11	111879522	111879528	chr11:111879522..111879528,chr11:111879445..111879556,+;peak:chr11:111879525..111879526,+;peakCounts:318.6	1281	+	111879525	ENST00000260276.8	ENSG00000137720.8	alternative	C11orf1
0.502582	1.78854	8.13637	0.0043386	0.21516	rDPI_4212	chr1	200669905	200669918	chr1:200669905..200669918,chr1:200669793..200670015,-;peak:chr1:200669912..200669913,-;peakCounts:411.2	926	-	200669912	ENST00000447706.6	ENSG00000118197.14	alternative	DDX59
0.457735	1.4187	8.13596	0.00433958	0.21516	rDPI_47607	chr7	73154958	73154966	chr7:73154958..73154966,chr7:73154890..73155012,+;peak:chr7:73154961..73154962,+;peakCounts:665.1	1323	+	73154961	ENST00000544802.5	ENSG00000233369.7	alternative	GTF2IP4
-0.316132	1.74633	8.13331	0.00434594	0.215312	rDPI_50528	chr8	100952454	100952465	chr8:100952454..100952465,chr8:100952388..100952563,-;peak:chr8:100952460..100952461,-;peakCounts:267.2	1145	-	100952460	ENST00000523938.1	ENSG00000164924.18	alternative	YWHAZ
0.474863	5.81152	8.12502	0.00436586	0.216055	rDPI_23487	chr18	3219911	3219924	chr18:3219911..3219924,chr18:3219650..3220211,-;peak:chr18:3219915..3219916,-;peakCounts:14718.4	35511	-	3219915	ENST00000356443.9	ENSG00000101605.13	alternative	MYOM1
0.413127	0.931696	8.12431	0.00436756	0.216055	rDPI_32056	chr2	216695389	216695393	chr2:216695389..216695393,chr2:216695222..216695448,-;peak:chr2:216695392..216695393,-;peakCounts:19.4	147	-	216695392	ENST00000233813.5	ENSG00000115461.5	alternative	IGFBP5
0.44211	3.85046	8.12214	0.00437279	0.21615	rDPI_49266	chr8	1763325	1763334	chr8:1763325..1763334,chr8:1763238..1763411,-;peak:chr8:1763328..1763329,-;peakCounts:4887	11724	-	1763328	ENST00000518481.1	ENSG00000253982.2	promoter	LOC101927752
-0.484553	2.40228	8.11858	0.00438139	0.216412	rDPI_25904	chr19	35030797	35030803	chr19:35030797..35030803,chr19:35030663..35030853,+;peak:chr19:35030802..35030803,+;peakCounts:859.4	2462	+	35030802	ENST00000595652.5	ENSG00000105711.13	alternative	SCN1B
-0.474371	6.70231	8.11622	0.00438709	0.216437	rDPI_7581	chr10	119651560	119651574	chr10:119651560..119651574,chr10:119651347..119651787,+;peak:chr10:119651570..119651571,+;peakCounts:16621.2	67655	+	119651570	ENST00000369085.8	ENSG00000151929.10	enhancer	BAG3
-0.636916	1.81448	8.11563	0.00438853	0.216437	rDPI_34216	chr21	25729700	25729737	chr21:25729700..25729737,chr21:25729647..25729805,-;peak:chr21:25729726..25729727,-;peakCounts:89.1	799	-	25729726	ENST00000486002.1	ENSG00000154723.13	enhancer	ATP5PF
0.560839	7.04443	8.11138	0.00439882	0.21678	rDPI_29979	chr2	169509641	169509816	chr2:169509641..169509816,chr2:169509641..169509816,+	79274	+	169509702	ENST00000284669.2	ENSG00000239474.7	promoter	KLHL41
0.367248	1.13123	8.10718	0.00440903	0.217008	rDPI_7122	chr10	100347148	100347159	chr10:100347148..100347159,chr10:100347069..100347269,+;peak:chr10:100347153..100347154,+;peakCounts:133.4	264	+	100347153	ENST00000370355.3	ENSG00000099194.6	alternative	SCD
-0.415914	1.38796	8.10674	0.00441009	0.217008	rDPI_40132	chr4	94342833	94342841	chr4:94342833..94342841,chr4:94342819..94342917,-;peak:chr4:94342835..94342836,-;peakCounts:418.5	710	-	94342835	ENST00000295256.10	ENSG00000163106.11	promoter	HPGDS
0.749097	6.05259	8.10364	0.00441765	0.217167	rDPI_49430	chr8	17676306	17676539	chr8:17676306..17676539,chr8:17676306..17676539,-	30539	-	17676492	ENST00000517413.5	ENSG00000129422.14	promoter	MTUS1
0.407898	1.42644	8.10269	0.00441996	0.217167	rDPI_25434	chr19	14562359	14562365	chr19:14562359..14562365,chr19:14562192..14562401,+;peak:chr19:14562364..14562365,+;peakCounts:382.7	678	+	14562364	ENST00000596073.6	ENSG00000099797.15	alternative	TECR
-0.324016	3.09816	8.10025	0.00442591	0.217296	rDPI_35648	chr22	45163795	45163827	chr22:45163795..45163827,chr22:45163676..45163884,-;peak:chr22:45163800..45163801,-;peakCounts:1068.3	3718	-	45163800	ENST00000426282.6	ENSG00000226328.7	promoter	NUP50-DT
-0.649095	1.05631	8.09597	0.00443638	0.217602	rDPI_34125	chr21	8401282	8401288	chr21:8401282..8401288,chr21:8401279..8401345,+;peak:chr21:8401282..8401283,+;peakCounts:305.1	339	+	8401282	ENST00000613359.1	ENSG00000275215.1	alternative	RNA5-8SN3
0.336518	1.52479	8.09463	0.00443966	0.217602	rDPI_1959	chr1	66925328	66925343	chr1:66925328..66925343,chr1:66925287..66925353,+;peak:chr1:66925334..66925335,+;peakCounts:378	932	+	66925334	ENST00000401041.6	ENSG00000198160.15	enhancer	MIER1
-1.10007	2.37032	8.09362	0.00444214	0.217602	rDPI_16788	chr14	106538337	106538345	chr14:106538337..106538345,-	2011	-	106538344	ENST00000390624.3	ENSG00000211964.3	promoter	IGHV3-48
-0.596537	4.31003	8.08331	0.00446747	0.218678	rDPI_36039	chr3	14540331	14540350	chr3:14540331..14540350,chr3:14540269..14540446,-;peak:chr3:14540341..14540342,-;peakCounts:3307.5	10556	-	14540341	ENST00000621039.5	ENSG00000144596.13	promoter	GRIP2
-0.723643	2.70436	8.08104	0.00447307	0.218759	rDPI_11013	chr12	6868864	6868870	chr12:6868864..6868870,+	2142	+	6868869	ENST00000495834.1	ENSG00000111669.15	enhancer	TPI1
0.436742	0.867361	8.07993	0.00447581	0.218759	chr15:99181460-99181959	chr15	99181460	99181959	chr15:99181460-99181959	12	.	99181601	ENST00000434594.5	ENSG00000103852.13	enhancer	TTC23
0.416524	2.36525	8.07768	0.00448137	0.218867	rDPI_10975	chr12	6614147	6614157	chr12:6614147..6614157,chr12:6614096..6614185,-;peak:chr12:6614149..6614150,-;peakCounts:695.7	2240	-	6614149	ENST00000645265.1	ENSG00000111642.16	promoter	CHD4
0.679805	1.71547	8.07314	0.00449261	0.219252	rDPI_38377	chr3	158105733	158105746	chr3:158105733..158105746,chr3:158105729..158105807,-;peak:chr3:158105739..158105740,-;peakCounts:380.7	986	-	158105739	ENST00000554685.2	ENSG00000168779.20	promoter	SHOX2
0.425648	2.45771	8.07073	0.00449859	0.219351	rDPI_44498	chr6	30742954	30742966	chr6:30742954..30742966,chr6:30742895..30742995,+;peak:chr6:30742959..30742960,+;peakCounts:1150.2	2492	+	30742959	ENST00000607333.1	ENSG00000272273.1	promoter	IER3-AS1
-0.530319	2.84909	8.0689	0.00450314	0.219351	rDPI_33050	chr20	23086353	23086358	chr20:23086353..23086358,chr20:23086175..23086441,-;peak:chr20:23086357..23086358,-;peakCounts:1804	3943	-	23086357	ENST00000246006.5	ENSG00000125810.10	alternative	CD93
0.875418	4.92273	8.06827	0.00450472	0.219351	rDPI_46594	chr6	168441176	168441194	chr6:168441176..168441194,chr6:168441101..168441367,+;peak:chr6:168441187..168441188,+;peakCounts:5796.9	20078	+	168441187	ENST00000356284.7	ENSG00000112562.19	promoter	SMOC2
-0.556083	1.44918	8.05885	0.0045282	0.220173	rDPI_53902	chrX	45770267	45770268	chrX:45770267..45770268,-	849	-	45770267	ENST00000602507.1	ENSG00000270069.1	promoter	NA
-0.337558	3.88118	8.05823	0.00452973	0.220173	rDPI_38403	chr3	158802132	158802143	chr3:158802132..158802143,chr3:158802029..158802219,+;peak:chr3:158802137..158802138,+;peakCounts:5975.1	8433	+	158802137	ENST00000471266.5	ENSG00000118855.21	alternative	MFSD1
0.389277	2.72028	8.05665	0.00453369	0.220173	rDPI_48740	chr7	130668735	130668741	chr7:130668735..130668741,chr7:130668693..130668769,-;peak:chr7:130668737..130668738,-;peakCounts:1142.8	2878	-	130668737	ENST00000425248.5	ENSG00000158623.14	alternative	COPG2
0.323558	1.59239	8.05609	0.00453509	0.220173	rDPI_33401	chr20	38083861	38083877	chr20:38083861..38083877,chr20:38083788..38083910,+;peak:chr20:38083866..38083867,+;peakCounts:198.3	689	+	38083866	ENST00000471511.1	ENSG00000101413.12	alternative	RPRD1B
0.398376	1.04133	8.048	0.0045554	0.220994	rDPI_49175	chr7	151729835	151729841	chr7:151729835..151729841,chr7:151729800..151729876,-;peak:chr7:151729840..151729841,-;peakCounts:132.3	166	-	151729840	ENST00000487375.2	ENSG00000106617.15	promoter	PRKAG2
0.366349	2.35	8.0447	0.00456369	0.221232	rDPI_7258	chr10	102714374	102714381	chr10:102714374..102714381,chr10:102714269..102714463,-;peak:chr10:102714377..102714378,-;peakCounts:685.1	1990	-	102714377	ENST00000260746.6	ENSG00000138175.9	alternative	ARL3
0.378933	3.34552	8.0411	0.00457278	0.221509	rDPI_17099	chr15	40340269	40340275	chr15:40340269..40340275,chr15:40340171..40340367,-;peak:chr15:40340269..40340270,-;peakCounts:2363.9	5071	-	40340269	ENST00000560922.1	ENSG00000188549.12	alternative	CCDC9B
0.395099	1.97105	8.03619	0.00458518	0.221945	rDPI_43426	chr5	157142842	157142849	chr5:157142842..157142849,chr5:157142747..157142911,-;peak:chr5:157142845..157142846,-;peakCounts:1593.2	2073	-	157142845	ENST00000286317.6	ENSG00000155868.8	alternative	MED7
0.575268	4.15279	8.03153	0.00459699	0.222351	rDPI_36706	chr3	48016425	48016429	chr3:48016425..48016429,chr3:48016340..48016538,-;peak:chr3:48016428..48016429,-;peakCounts:5780	10676	-	48016428	ENST00000633710.1	ENSG00000047849.21	alternative	MAP4
-0.545933	1.37251	8.03009	0.00460066	0.222364	rDPI_44618	chr6	31817637	31817653	chr6:31817637..31817653,chr6:31817542..31817753,+;peak:chr6:31817642..31817643,+;peakCounts:277.2	962	+	31817642	ENST00000608703.1	ENSG00000204389.10	alternative	HSPA1A
-0.338968	1.93409	8.02687	0.00460883	0.222475	rDPI_32643	chr2	241316165	241316181	chr2:241316165..241316181,+	1726	+	241316180	ENST00000420786.5	ENSG00000168385.18	alternative	SEPTIN2
0.482473	1.53734	8.02593	0.00461124	0.222475	rDPI_49648	chr8	25479983	25479989	chr8:25479983..25479989,chr8:25479954..25480103,+;peak:chr8:25479983..25479984,+;peakCounts:702.7	845	+	25479983	ENST00000521098.2	ENSG00000184661.14	alternative	CDCA2
-1.31011	3.39311	8.02517	0.00461318	0.222475	rDPI_6786	chr10	90912342	90912350	chr10:90912342..90912350,chr10:90912333..90912982,-;peak:chr10:90912342..90912343,-;peakCounts:1521.7	4518	-	90912342	ENST00000371697.4	ENSG00000148677.7	alternative	ANKRD1
-0.322173	2.12237	8.02229	0.00462051	0.222501	rDPI_34386	chr21	36070003	36070005	chr21:36070003..36070005,chr21:36069934..36070057,+;peak:chr21:36070003..36070004,+;peakCounts:786.5	1810	+	36070003	ENST00000439427.2	ENSG00000159228.13	alternative	CBR1
-0.681728	2.1669	8.02228	0.00462053	0.222501	rDPI_20876	chr17	6756066	6756070	chr17:6756066..6756070,chr17:6756019..6756088,+;peak:chr17:6756068..6756069,+;peakCounts:1370	2182	+	6756068	ENST00000575147.5	ENSG00000132530.17	alternative	XAF1
-0.515212	2.23064	8.01942	0.00462783	0.222688	rDPI_44523	chr6	31271696	31271727	chr6:31271696..31271727,chr6:31271601..31271872,-;peak:chr6:31271701..31271702,-;peakCounts:195.9	1323	-	31271701	ENST00000487245.5	ENSG00000204525.17	enhancer	HLA-C
0.804462	7.31299	8.01653	0.00463522	0.22288	rDPI_4641	chr1	209675302	209675543	chr1:209675302..209675543,chr1:209675302..209675543,+	166587	+	209675413	ENST00000367029.5	ENSG00000123689.6	promoter	G0S2
0.354904	1.38428	8.01451	0.0046404	0.222965	rDPI_38942	chr3	196712667	196712677	chr3:196712667..196712677,chr3:196712645..196712717,+;peak:chr3:196712671..196712672,+;peakCounts:469.8	719	+	196712671	ENST00000415832.5	ENSG00000163964.18	alternative	PIGX
0.793847	4.82007	8.01294	0.00464442	0.222994	rDPI_30941	chr2	178629606	178629616	chr2:178629606..178629616,chr2:178629536..178629739,-;peak:chr2:178629608..178629609,-;peakCounts:6215.4	17709	-	178629608	ENST00000446966.1	ENSG00000155657.28	enhancer	TTN
-0.678361	1.81406	8.00952	0.00465321	0.223216	rDPI_53306	chrM	1460	1481	chrM:1460..1481,chrM:1446..1556,+;peak:chrM:1475..1476,+;peakCounts:1169.1	2529	+	1475	ENST00000387342.1	ENSG00000210077.1	alternative	NA
-1.20106	2.66551	8.00591	0.0046625	0.223216	rDPI_16780	chr14	106235588	106235595	chr14:106235588..106235595,-	2972	-	106235594	ENST00000390607.2	ENSG00000211947.2	promoter	IGHV3-21
-0.486009	3.03686	8.00581	0.00466274	0.223216	rDPI_1796	chr1	54548250	54548256	chr1:54548250..54548256,chr1:54548167..54548327,+;peak:chr1:54548255..54548256,+;peakCounts:3867.1	4869	+	54548255	ENST00000371316.3	ENSG00000162390.18	alternative	ACOT11
0.664014	2.5461	8.00512	0.00466454	0.223216	rDPI_7594	chr10	121598418	121598456	chr10:121598418..121598456,chr10:121598361..121598497,-;peak:chr10:121598431..121598432,-;peakCounts:298.8	1749	-	121598431	ENST00000358487.10	ENSG00000066468.23	promoter	FGFR2
0.463512	1.04334	8.00449	0.00466614	0.223216	rDPI_46597	chr6	169182811	169182842	chr6:169182811..169182842,-	214	-	169182841	ENST00000564830.3	ENSG00000261039.3	promoter	LINC02544
0.544018	3.24044	8.00298	0.00467005	0.223239	rDPI_24225	chr18	74291931	74291938	chr18:74291931..74291938,chr18:74291791..74292029,-;peak:chr18:74291935..74291936,-;peakCounts:1284.5	4415	-	74291935	ENST00000494131.6	ENSG00000166347.19	alternative	CYB5A
0.395875	1.45369	8.00026	0.00467705	0.22341	rDPI_5701	chr10	18340825	18340828	chr10:18340825..18340828,chr10:18340650..18340910,+;peak:chr10:18340827..18340828,+;peakCounts:278.1	603	+	18340827	ENST00000612743.1	ENSG00000165995.22	alternative	CACNB2
0.477466	1.42225	7.99615	0.0046877	0.223755	rDPI_6429	chr10	72954801	72954816	chr10:72954801..72954816,chr10:72954781..72954893,-;peak:chr10:72954806..72954807,-;peakCounts:171.7	364	-	72954806	ENST00000373032.4	ENSG00000138308.6	alternative	PLA2G12B
-0.327813	1.633	7.99467	0.00469153	0.223775	rDPI_29793	chr2	159616504	159616522	chr2:159616504..159616522,chr2:159616407..159616611,-;peak:chr2:159616509..159616510,-;peakCounts:184.8	626	-	159616509	ENST00000541068.6	ENSG00000123636.18	alternative	BAZ2B
0.368932	2.55436	7.99264	0.00469678	0.223861	rDPI_3264	chr1	153986293	153986300	chr1:153986293..153986300,chr1:153986260..153986400,-;peak:chr1:153986296..153986297,-;peakCounts:1009.6	1876	-	153986296	ENST00000368575.5	ENSG00000143545.10	alternative	RAB13
-0.748325	2.12529	7.98943	0.00470511	0.223959	rDPI_2328	chr1	93909396	93909407	chr1:93909396..93909407,chr1:93909338..93909688,-;peak:chr1:93909401..93909402,-;peakCounts:570.4	2045	-	93909401	ENST00000370238.8	ENSG00000023909.10	alternative	GCLM
-0.52305	2.02451	7.98921	0.00470569	0.223959	rDPI_16594	chr14	103121473	103121478	chr14:103121473..103121478,chr14:103121403..103121495,+;peak:chr14:103121477..103121478,+;peakCounts:1376.1	2215	+	103121477	ENST00000333007.8	ENSG00000185215.11	promoter	TNFAIP2
-0.430622	1.74003	7.9859	0.0047143	0.224205	rDPI_3038	chr1	150579053	150579064	chr1:150579053..150579064,chr1:150578834..150579220,-;peak:chr1:150579058..150579059,-;peakCounts:584.1	736	-	150579058	ENST00000464132.2	ENSG00000143384.14	ambiguous	MCL1
0.404688	1.27489	7.98111	0.00472679	0.224474	rDPI_48330	chr7	106269467	106269472	chr7:106269467..106269472,chr7:106269425..106269490,-;peak:chr7:106269471..106269472,-;peakCounts:237	485	-	106269471	ENST00000467730.1	ENSG00000105835.13	alternative	NAMPT
0.697446	1.06862	7.9811	0.00472681	0.224474	rDPI_19161	chr16	17377489	17377490	chr16:17377489..17377490,-	107	-	17377489	ENST00000563403.1	ENSG00000103489.12	enhancer	XYLT1
0.467891	1.67081	7.97269	0.00474884	0.225356	rDPI_38846	chr3	192566997	192567005	chr3:192566997..192567005,chr3:192566925..192567131,+;peak:chr3:192567001..192567002,+;peakCounts:443.9	782	+	192567001	ENST00000452848.1	ENSG00000226709.1	alternative	NA
0.538174	3.60844	7.96851	0.00475981	0.225713	rDPI_16090	chr14	74084400	74084404	chr14:74084400..74084404,chr14:74084356..74084512,-;peak:chr14:74084400..74084401,-;peakCounts:3559.3	6448	-	74084400	ENST00000553814.5	ENSG00000119711.13	alternative	ALDH6A1
0.315991	1.56776	7.9664	0.00476537	0.225812	rDPI_21283	chr17	17823630	17823633	chr17:17823630..17823633,chr17:17823583..17823682,-;peak:chr17:17823631..17823632,-;peakCounts:104	366	-	17823631	ENST00000423161.3	ENSG00000072310.17	alternative	SREBF1
0.345798	2.05508	7.96	0.00478225	0.226408	rDPI_6187	chr10	60300500	60300511	chr10:60300500..60300511,chr10:60300325..60300542,-;peak:chr10:60300505..60300506,-;peakCounts:204.8	1485	-	60300505	ENST00000503925.1	ENSG00000151150.22	alternative	ANK3
0.397692	3.72205	7.95652	0.00479146	0.226408	rDPI_52180	chr9	101487099	101487116	chr9:101487099..101487116,chr9:101486971..101487255,-;peak:chr9:101487111..101487112,-;peakCounts:2329.2	7198	-	101487111	ENST00000374847.5	ENSG00000165152.9	alternative	PGAP4
0.341824	1.98456	7.95631	0.004792	0.226408	rDPI_19095	chr16	11797225	11797228	chr16:11797225..11797228,chr16:11797181..11797292,-;peak:chr16:11797226..11797227,-;peakCounts:787.8	1338	-	11797226	ENST00000575170.1	ENSG00000122299.12	alternative	ZC3H7A
0.590612	7.45171	7.9563	0.00479203	0.226408	rDPI_14040	chr13	41457458	41457706	chr13:41457458..41457706,chr13:41457458..41457706,+	131893	+	41457550	ENST00000379359.4	ENSG00000102760.13	promoter	RGCC
-0.315395	3.58552	7.95507	0.00479528	0.226408	rDPI_14722	chr14	21511325	21511342	chr14:21511325..21511342,chr14:21511250..21511372,-;peak:chr14:21511329..21511330,-;peakCounts:1970.1	6054	-	21511329	ENST00000298717.9	ENSG00000165819.12	promoter	METTL3
0.328356	3.8197	7.94745	0.00481551	0.227154	rDPI_15932	chr14	65102486	65102492	chr14:65102486..65102492,chr14:65102239..65102578,-;peak:chr14:65102486..65102487,-;peakCounts:83.1999999999998	6413	-	65102486	ENST00000284165.10	ENSG00000125952.20	alternative	MAX
1.00399	3.23576	7.94012	0.00483507	0.227154	rDPI_39483	chr4	41256928	41256931	chr4:41256928..41256931,chr4:41256840..41256956,+;peak:chr4:41256928..41256929,+;peakCounts:6209.1	7370	+	41256928	ENST00000284440.9	ENSG00000154277.13	promoter	UCHL1
-0.26153	5.25577	7.93995	0.00483551	0.227154	rDPI_39213	chr4	6782716	6782752	chr4:6782716..6782752,chr4:6782602..6782864,+;peak:chr4:6782741..6782742,+;peakCounts:4266	24142	+	6782741	ENST00000307659.6	ENSG00000170871.12	promoter	KIAA0232
-0.532899	1.59832	7.93782	0.00484122	0.227154	rDPI_17151	chr15	41332870	41332885	chr15:41332870..41332885,+	750	+	41332883	ENST00000450592.6	ENSG00000137804.14	promoter	NUSAP1
-0.613048	1.87262	7.93657	0.00484455	0.227154	rDPI_11243	chr12	14882192	14882223	chr12:14882192..14882223,chr12:14882085..14882285,-;peak:chr12:14882208..14882209,-;peakCounts:175	735	-	14882208	ENST00000545199.5	ENSG00000111341.10	not_classified	MGP
0.336072	3.41201	7.93619	0.00484558	0.227154	rDPI_38696	chr3	184314650	184314656	chr3:184314650..184314656,chr3:184314490..184314667,+;peak:chr3:184314653..184314654,+;peakCounts:2045.4	5754	+	184314653	ENST00000427141.6	ENSG00000114867.22	alternative	EIF4G1
-0.453065	1.49868	7.93462	0.00484979	0.227154	rDPI_20649	chr17	1771721	1771743	chr17:1771721..1771743,chr17:1771638..1771778,+;peak:chr17:1771737..1771738,+;peakCounts:246.6	798	+	1771737	ENST00000573763.1	ENSG00000132386.11	promoter	SERPINF1
0.562125	3.0858	7.93414	0.00485108	0.227154	rDPI_17466	chr15	51924373	51924395	chr15:51924373..51924395,chr15:51924334..51924464,+;peak:chr15:51924378..51924379,+;peakCounts:1689.3	6237	+	51924378	ENST00000558666.1	ENSG00000138594.14	promoter	TMOD3
0.251662	4.6105	7.93363	0.00485244	0.227154	rDPI_17356	chr15	45587371	45587385	chr15:45587371..45587385,chr15:45587310..45587517,+;peak:chr15:45587379..45587380,+;peakCounts:7839	14050	+	45587379	ENST00000568597.5	ENSG00000104164.12	promoter	BLOC1S6
-0.386229	0.994898	7.93331	0.0048533	0.227154	rDPI_20777	chr17	4902747	4902762	chr17:4902747..4902762,chr17:4902624..4902762,-;peak:chr17:4902756..4902757,-;peakCounts:32.9	110	-	4902756	ENST00000575637.1	ENSG00000108556.10	alternative	CHRNE
-0.240673	3.25883	7.93202	0.00485674	0.227154	rDPI_23968	chr18	46174032	46174045	chr18:46174032..46174045,chr18:46173972..46174314,+;peak:chr18:46174042..46174043,+;peakCounts:707.3	6262	+	46174042	ENST00000619301.4	ENSG00000152242.11	alternative	C18orf25
-0.602431	1.64386	7.93189	0.0048571	0.227154	rDPI_13180	chr12	111993741	111993787	chr12:111993741..111993787,+	894	+	111993783	ENST00000547720.1	ENSG00000258373.1	enhancer	NA
0.338685	2.00862	7.93136	0.00485853	0.227154	rDPI_25765	chr19	23274227	23274238	chr19:23274227..23274238,chr19:23274161..23274277,-;peak:chr19:23274232..23274233,-;peakCounts:841.5	1284	-	23274232	ENST00000594653.1	ENSG00000269107.1	promoter	NA
0.359809	1.37341	7.93054	0.00486074	0.227154	rDPI_31612	chr2	190181013	190181020	chr2:190181013..190181020,chr2:190180614..190181095,+;peak:chr2:190181016..190181017,+;peakCounts:17.3	620	+	190181016	ENST00000443551.2	ENSG00000187699.10	alternative	C2orf88
0.253568	5.19092	7.9296	0.00486326	0.227154	rDPI_12249	chr12	57752290	57752304	chr12:57752290..57752304,chr12:57752246..57752411,-;peak:chr12:57752298..57752299,-;peakCounts:8643.6	19458	-	57752298	ENST00000550419.5	ENSG00000135446.17	promoter	CDK4
0.387796	1.7996	7.92056	0.00488761	0.228128	rDPI_38473	chr3	168095390	168095396	chr3:168095390..168095396,chr3:168095242..168095997,-;peak:chr3:168095390..168095391,-;peakCounts:696.4	1147	-	168095390	ENST00000309027.4	ENSG00000173905.9	alternative	GOLIM4
-0.442088	0.878182	7.91784	0.00489497	0.228308	rDPI_32375	chr2	229283226	229283229	chr2:229283226..229283229,-	151	-	229283226	ENST00000392055.8	ENSG00000153823.19	enhancer	PID1
0.317884	5.25818	7.91606	0.00489977	0.228326	rDPI_19143	chr16	15434503	15434515	chr16:15434503..15434515,chr16:15434468..15434624,+;peak:chr16:15434507..15434508,+;peakCounts:10168.2	31475	+	15434507	ENST00000570249.5	ENSG00000166780.11	promoter	BMERB1
-0.767323	5.12837	7.91511	0.00490235	0.228326	rDPI_39443	chr4	39527437	39527447	chr4:39527437..39527447,chr4:39527341..39527631,-;peak:chr4:39527437..39527438,-;peakCounts:7021.8	20714	-	39527437	ENST00000316423.11	ENSG00000109814.12	promoter	UGDH
-0.419597	1.80805	7.90908	0.00491873	0.228759	rDPI_6346	chr10	70885865	70885874	chr10:70885865..70885874,chr10:70885843..70885926,-;peak:chr10:70885868..70885869,-;peakCounts:315.9	609	-	70885868	ENST00000493961.5	ENSG00000166228.9	promoter	PCBD1
-0.446956	1.69251	7.90834	0.00492073	0.228759	rDPI_10098	chr11	101907959	101907973	chr11:101907959..101907973,chr11:101907916..101908015,-;peak:chr11:101907967..101907968,-;peakCounts:216	937	-	101907967	ENST00000534527.1	ENSG00000187151.7	promoter	ANGPTL5
0.447429	4.59155	7.90754	0.00492292	0.228759	rDPI_42247	chr5	83747012	83747013	chr5:83747012..83747013,-	13617	-	83747012	ENST00000492855.1	ENSG00000242858.1	promoter	RPL13AP14
0.428502	5.2439	7.90635	0.00492615	0.228759	rDPI_35389	chr22	39152528	39152593	chr22:39152528..39152593,chr22:39152414..39152753,-;peak:chr22:39152552..39152553,-;peakCounts:3116.7	21982	-	39152552	ENST00000434260.1	ENSG00000100307.13	promoter	CBX7
-0.466831	1.00327	7.90525	0.00492916	0.228759	rDPI_44152	chr6	16265798	16265799	chr6:16265798..16265799,+	217	+	16265798	ENST00000543191.5	ENSG00000137198.10	enhancer	GMPR
-0.357992	2.93368	7.89948	0.0049449	0.229321	rDPI_46952	chr7	18495736	18495743	chr7:18495736..18495743,chr7:18495671..18495818,+;peak:chr7:18495739..18495740,+;peakCounts:2718.9	3978	+	18495739	ENST00000476135.5	ENSG00000048052.23	promoter	HDAC9
0.351816	1.46946	7.89778	0.00494956	0.229321	rDPI_54903	chrX	136497627	136497632	chrX:136497627..136497632,chrX:136497466..136497652,+;peak:chrX:136497631..136497632,+;peakCounts:31.6999999999999	840	+	136497631	ENST00000218364.5	ENSG00000102241.12	alternative	HTATSF1
-0.430566	1.39037	7.89696	0.0049518	0.229321	rDPI_19389	chr16	29259917	29259926	chr16:29259917..29259926,chr16:29259881..29259932,+;peak:chr16:29259922..29259923,+;peakCounts:448.2	738	+	29259922	ENST00000622268.1	ENSG00000277999.1	ambiguous	NA
-0.645226	4.02821	7.89419	0.00495937	0.229356	rDPI_17689	chr15	63062573	63062583	chr15:63062573..63062583,chr15:63062572..63062648,+;peak:chr15:63062577..63062578,+;peakCounts:2539.8	7541	+	63062577	ENST00000651622.1	ENSG00000140416.23	enhancer	TPM1
0.524841	2.68277	7.89412	0.00495957	0.229356	rDPI_33410	chr20	38085300	38085317	chr20:38085300..38085317,chr20:38085097..38085401,+;peak:chr20:38085311..38085312,+;peakCounts:2379.6	3474	+	38085311	ENST00000484683.1	ENSG00000101413.12	promoter	RPRD1B
-0.378098	2.76169	7.89188	0.00496573	0.229478	rDPI_22885	chr17	73092684	73092692	chr17:73092684..73092692,chr17:73092628..73092729,-;peak:chr17:73092688..73092689,-;peakCounts:1811.7	2765	-	73092688	ENST00000542342.6	ENSG00000133195.11	promoter	SLC39A11
-0.486581	1.37319	7.889	0.00497364	0.229681	rDPI_16754	chr14	105479909	105479920	chr14:105479909..105479920,chr14:105479573..105480019,+;peak:chr14:105479914..105479915,+;peakCounts:117.9	330	+	105479914	ENST00000551738.1	ENSG00000182809.11	alternative	CRIP2
0.426063	4.19358	7.88456	0.00498586	0.229992	rDPI_39570	chr4	48906765	48906780	chr4:48906765..48906780,chr4:48906674..48906836,-;peak:chr4:48906774..48906775,-;peakCounts:3421.8	7107	-	48906774	ENST00000508632.6	ENSG00000145247.12	promoter	OCIAD2
0.781933	1.69196	7.88399	0.00498743	0.229992	rDPI_32670	chr2	242084153	242084163	chr2:242084153..242084163,chr2:242084118..242084227,-;peak:chr2:242084158..242084159,-;peakCounts:261.1	858	-	242084158	ENST00000446593.1	ENSG00000232002.2	alternative	LINC01880
0.352233	1.34906	7.88171	0.00499374	0.230121	rDPI_28228	chr2	39665913	39665925	chr2:39665913..39665925,chr2:39665860..39665984,+;peak:chr2:39665919..39665920,+;peakCounts:199.8	606	+	39665919	ENST00000281961.3	ENSG00000152154.11	alternative	TMEM178A
-0.399268	1.1947	7.87969	0.00499931	0.230215	rDPI_23163	chr17	78214269	78214284	chr17:78214269..78214284,chr17:78214243..78214300,+;peak:chr17:78214279..78214280,+;peakCounts:142.2	303	+	78214279	ENST00000590449.1	ENSG00000089685.15	promoter	BIRC5
-0.348829	3.06796	7.87781	0.00500451	0.230292	rDPI_51495	chr9	34637802	34637812	chr9:34637802..34637812,chr9:34637717..34637850,-;peak:chr9:34637806..34637807,-;peakCounts:2174.7	4696	-	34637806	ENST00000680730.1	ENSG00000147955.18	alternative	SIGMAR1
-0.786888	2.50115	7.87522	0.00501169	0.23046	rDPI_24288	chr18	79395930	79395931	chr18:79395930..79395931,chr18:79395883..79396024,+;peak:chr18:79395930..79395931,+;peakCounts:3009.6	3344	+	79395930	ENST00000591814.5	ENSG00000131196.18	promoter	NFATC1
0.342426	9.04534	7.87261	0.00501892	0.23063	rDPI_875	chr1	24745442	24745448	chr1:24745442..24745448,chr1:24745265..24745603,+;peak:chr1:24745447..24745448,+;peakCounts:315869.4	366948	+	24745447	ENST00000374379.9	ENSG00000169504.15	promoter	CLIC4
-0.668081	3.68765	7.86922	0.00502833	0.230634	rDPI_41114	chr4	185145154	185145186	chr4:185145154..185145186,chr4:185144758..185145272,+;peak:chr4:185145168..185145169,+;peakCounts:1450.8	6215	+	185145168	ENST00000491736.1	ENSG00000151729.11	enhancer	SLC25A4
-0.716454	2.38636	7.86887	0.00502932	0.230634	rDPI_14944	chr14	23397573	23397581	chr14:23397573..23397581,chr14:23397543..23397642,-;peak:chr14:23397577..23397578,-;peakCounts:1073.7	1802	-	23397577	ENST00000362287.2	ENSG00000199157.2	alternative	MIR208A
0.555179	2.85781	7.86876	0.00502961	0.230634	rDPI_29600	chr2	131478356	131478361	chr2:131478356..131478361,+	2732	+	131478359	ENST00000409047.2	ENSG00000075886.11	enhancer	TUBA3D
-0.95005	1.98716	7.86514	0.0050397	0.230935	rDPI_34830	chr22	22720623	22720628	chr22:22720623..22720628,+	1383	+	22720623	ENST00000390309.2	ENSG00000211663.2	promoter	IGLV3-19
-0.450413	2.28177	7.85991	0.00505429	0.231441	rDPI_33101	chr20	25390801	25390804	chr20:25390801..25390804,chr20:25390705..25390912,-;peak:chr20:25390802..25390803,-;peakCounts:978.1	2018	-	25390802	ENST00000339157.10	ENSG00000100997.20	alternative	ABHD12
0.602198	2.21773	7.858	0.00505963	0.231523	rDPI_7971	chr11	2132215	2132236	chr11:2132215..2132236,chr11:2131458..2132282,-;peak:chr11:2132225..2132226,-;peakCounts:287.3	1257	-	2132225	ENST00000385070.3	ENSG00000207805.3	promoter	MIR483
-0.321555	1.60068	7.85329	0.00507282	0.231964	rDPI_22152	chr17	45132537	45132544	chr17:45132537..45132544,chr17:45132475..45132575,-;peak:chr17:45132540..45132541,-;peakCounts:557.6	829	-	45132540	ENST00000544446.1	ENSG00000161714.12	alternative	PLCD3
-0.38555	2.63961	7.84958	0.00508326	0.232016	rDPI_34388	chr21	36135083	36135087	chr21:36135083..36135087,chr21:36135036..36135088,+;peak:chr21:36135086..36135087,+;peakCounts:3397.5	3884	+	36135086	ENST00000290354.6	ENSG00000159231.6	promoter	CBR3
-0.542606	1.57122	7.84905	0.00508473	0.232016	rDPI_27637	chr2	6865691	6865702	chr2:6865691..6865702,chr2:6865620..6865745,-;peak:chr2:6865696..6865697,-;peakCounts:198.1	685	-	6865696	ENST00000404168.1	ENSG00000134326.12	alternative	CMPK2
0.270454	4.75983	7.84578	0.00509395	0.232016	rDPI_51066	chr8	144428513	144428528	chr8:144428513..144428528,chr8:144428490..144428571,-;peak:chr8:144428518..144428519,-;peakCounts:3205.8	13113	-	144428518	ENST00000524521.1	ENSG00000160948.14	promoter	VPS28
-0.48394	2.30361	7.84564	0.00509434	0.232016	rDPI_40954	chr4	168878222	168878243	chr4:168878222..168878243,chr4:168877699..168878386,+;peak:chr4:168878228..168878229,+;peakCounts:702	1621	+	168878228	ENST00000364306.1	ENSG00000201176.1	alternative	RNU6-853P
-0.426248	1.92538	7.8455	0.00509475	0.232016	rDPI_41585	chr5	39425196	39425202	chr5:39425196..39425202,chr5:39424839..39425231,-;peak:chr5:39425201..39425202,-;peakCounts:384.9	1064	-	39425201	ENST00000545653.5	ENSG00000153071.15	alternative	DAB2
-0.575469	2.52373	7.84528	0.00509537	0.232016	rDPI_16436	chr14	94581456	94581475	chr14:94581456..94581475,chr14:94581346..94581489,+;peak:chr14:94581463..94581464,+;peakCounts:688.5	2681	+	94581463	ENST00000554633.5	ENSG00000188488.14	promoter	SERPINA5
-0.469495	1.34626	7.84405	0.00509883	0.232016	rDPI_54350	chrX	77902662	77902681	chrX:77902662..77902681,chrX:77902640..77902741,+;peak:chrX:77902672..77902673,+;peakCounts:117.9	358	+	77902672	ENST00000647835.1	ENSG00000131174.7	enhancer	COX7B
0.350757	3.59516	7.83849	0.00511454	0.232493	rDPI_29002	chr2	85612032	85612037	chr2:85612032..85612037,chr2:85611872..85612096,-;peak:chr2:85612032..85612033,-;peakCounts:3714.1	5189	-	85612032	ENST00000409734.3	ENSG00000168887.11	alternative	C2orf68
0.40694	3.02352	7.83782	0.00511643	0.232493	rDPI_11357	chr12	21774784	21774799	chr12:21774784..21774799,chr12:21774558..21774834,-;peak:chr12:21774788..21774789,-;peakCounts:931.9	3591	-	21774788	ENST00000240662.3	ENSG00000121361.5	alternative	KCNJ8
-0.851827	1.47496	7.83614	0.00512118	0.232547	rDPI_34808	chr22	22030972	22030973	chr22:22030972..22030973,+	854	+	22030972	ENST00000390282.2	ENSG00000211637.2	promoter	IGLV4-69
-0.900028	2.79702	7.83276	0.00513076	0.232814	rDPI_20874	chr17	6756046	6756051	chr17:6756046..6756051,chr17:6756019..6756088,+;peak:chr17:6756047..6756048,+;peakCounts:1818	3594	+	6756047	ENST00000576459.1	ENSG00000132530.17	promoter	XAF1
0.479401	1.39427	7.83156	0.00513418	0.232814	rDPI_27749	chr2	15538938	15538947	chr2:15538938..15538947,chr2:15538887..15538992,-;peak:chr2:15538943..15538944,-;peakCounts:350.1	577	-	15538943	ENST00000281513.10	ENSG00000151779.13	enhancer	NBAS
0.275591	1.87372	7.82786	0.00514469	0.233128	rDPI_23058	chr17	75979238	75979242	chr17:75979238..75979242,chr17:75979210..75979365,+;peak:chr17:75979240..75979241,+;peakCounts:159	1362	+	75979240	ENST00000397640.6	ENSG00000257949.7	alternative	TEN1
0.423072	1.23776	7.82465	0.00515384	0.233381	rDPI_24052	chr18	50650066	50650078	chr18:50650066..50650078,chr18:50649982..50650232,+;peak:chr18:50650071..50650072,+;peakCounts:83.7	498	+	50650071	ENST00000587823.1	ENSG00000141639.12	alternative	MAPK4
-0.420089	1.25185	7.8231	0.00515826	0.233419	rDPI_4748	chr1	214603179	214603215	chr1:214603179..214603215,+	448	+	214603195	ENST00000464322.5	ENSG00000117724.13	promoter	CENPF
-0.80635	2.41325	7.81703	0.00517562	0.234043	rDPI_8780	chr11	47342858	47342897	chr11:47342858..47342897,chr11:47342828..47342943,-;peak:chr11:47342862..47342863,-;peakCounts:207.9	2468	-	47342862	ENST00000544791.1	ENSG00000134571.11	alternative	MYBPC3
0.383537	1.70643	7.81517	0.00518095	0.234121	rDPI_47316	chr7	44104538	44104580	chr7:44104538..44104580,chr7:44104524..44104799,+;peak:chr7:44104574..44104575,+;peakCounts:156.1	810	+	44104574	ENST00000223357.8	ENSG00000106624.11	enhancer	AEBP1
-0.270609	5.40864	7.81335	0.00518618	0.234196	rDPI_46986	chr7	23014084	23014094	chr7:23014084..23014094,chr7:23014059..23014157,-;peak:chr7:23014088..23014089,-;peakCounts:16720.2	23650	-	23014088	ENST00000465661.2	ENSG00000122591.13	promoter	FAM126A
-0.515251	1.5124	7.81162	0.00519112	0.234257	rDPI_17203	chr15	42414625	42414661	chr15:42414625..42414661,chr15:42414406..42414795,-;peak:chr15:42414644..42414645,-;peakCounts:104.1	688	-	42414644	ENST00000568906.5	ENSG00000103994.18	enhancer	ZNF106
-0.344536	1.94058	7.80857	0.00519991	0.234492	rDPI_33323	chr20	36461825	36461832	chr20:36461825..36461832,chr20:36461755..36461908,+;peak:chr20:36461830..36461831,+;peakCounts:448.1	1542	+	36461830	ENST00000340491.8	ENSG00000080845.18	alternative	DLGAP4
-0.354115	1.28382	7.80441	0.00521189	0.234869	rDPI_28993	chr2	85579119	85579121	chr2:85579119..85579121,+	408	+	85579120	ENST00000409760.1	ENSG00000118640.11	alternative	VAMP8
0.371427	5.25712	7.80268	0.00521688	0.234932	rDPI_7349	chr10	110007970	110007985	chr10:110007970..110007985,chr10:110007915..110008020,+;peak:chr10:110007984..110007985,+;peakCounts:13562.1	26466	+	110007984	ENST00000356080.9	ENSG00000148700.15	promoter	ADD3
0.682672	1.10828	7.79337	0.00524382	0.235983	rDPI_28746	chr2	68882120	68882126	chr2:68882120..68882126,chr2:68882013..68882126,-;peak:chr2:68882125..68882126,-;peakCounts:47.9	178	-	68882125	ENST00000295379.2	ENSG00000163217.2	enhancer	BMP10
-0.361042	1.8755	7.78928	0.00525573	0.236045	rDPI_25601	chr19	18193214	18193223	chr19:18193214..18193223,chr19:18193169..18193278,+;peak:chr19:18193218..18193219,+;peakCounts:641.4	1308	+	18193218	ENST00000534421.1	ENSG00000254858.10	alternative	MPV17L2
0.551825	1.89159	7.78761	0.00526058	0.236045	rDPI_6593	chr10	79825888	79825917	chr10:79825888..79825917,+	2546	+	79825899	ENST00000605920.1	ENSG00000272447.1	promoter	LOC642361
-0.792025	2.33154	7.78734	0.00526135	0.236045	rDPI_50780	chr8	125430336	125430346	chr8:125430336..125430346,chr8:125430153..125430497,+;peak:chr8:125430340..125430341,+;peakCounts:2169	3113	+	125430340	ENST00000311922.4	ENSG00000173334.4	alternative	TRIB1
0.315578	4.13121	7.7867	0.00526322	0.236045	rDPI_24815	chr19	5978089	5978098	chr19:5978089..5978098,chr19:5978063..5978186,-;peak:chr19:5978092..5978093,-;peakCounts:9091.8	15096	-	5978092	ENST00000591092.5	ENSG00000031823.14	promoter	RANBP3
0.395425	1.16656	7.7862	0.00526467	0.236045	rDPI_3130	chr1	151721517	151721535	chr1:151721517..151721535,+	392	+	151721531	ENST00000479191.2	ENSG00000178796.13	promoter	RIIAD1
-0.883177	2.21313	7.78494	0.00526836	0.236045	rDPI_6788	chr10	90912471	90912478	chr10:90912471..90912478,chr10:90912333..90912982,-;peak:chr10:90912474..90912475,-;peakCounts:16.6999999999999	1132	-	90912474	ENST00000371697.4	ENSG00000148677.7	alternative	ANKRD1
-1.01737	2.35826	7.78382	0.00527164	0.236045	rDPI_48566	chr7	123663996	123664008	chr7:123663996..123664008,chr7:123663715..123664110,+;peak:chr7:123664001..123664002,+;peakCounts:1487.7	2488	+	123664001	ENST00000456238.2	ENSG00000170807.12	enhancer	LMOD2
0.501975	3.52513	7.78219	0.00527639	0.236045	rDPI_50784	chr8	126558386	126558401	chr8:126558386..126558401,chr8:126558279..126558487,-;peak:chr8:126558391..126558392,-;peakCounts:2416.5	6286	-	126558391	ENST00000304916.4	ENSG00000168672.4	promoter	LRATD2
-0.362023	1.11316	7.78173	0.00527773	0.236045	rDPI_38306	chr3	151873642	151873645	chr3:151873642..151873645,chr3:151873630..151873682,+;peak:chr3:151873643..151873644,+;peakCounts:256.5	329	+	151873643	ENST00000362032.6	ENSG00000198829.6	promoter	SUCNR1
0.287326	2.84632	7.77928	0.00528488	0.236203	rDPI_46216	chr6	143450800	143450811	chr6:143450800..143450811,chr6:143450764..143451014,+;peak:chr6:143450805..143450806,+;peakCounts:3345.3	4003	+	143450805	ENST00000367591.5	ENSG00000034693.15	promoter	PEX3
-0.355658	1.85316	7.77348	0.00530187	0.236683	rDPI_28588	chr2	64524378	64524388	chr2:64524378..64524388,chr2:64524305..64524460,+;peak:chr2:64524381..64524382,+;peakCounts:257	1545	+	64524381	ENST00000238856.8	ENSG00000119844.15	alternative	AFTPH
0.361307	3.85334	7.77314	0.00530287	0.236683	rDPI_38190	chr3	142149485	142149500	chr3:142149485..142149500,chr3:142149445..142149568,-;peak:chr3:142149495..142149496,-;peakCounts:2700	8193	-	142149495	ENST00000494358.5	ENSG00000114126.18	promoter	TFDP2
-0.425857	6.19144	7.76835	0.00531695	0.237061	rDPI_11252	chr12	14961587	14961602	chr12:14961587..14961602,chr12:14961547..14961629,-;peak:chr12:14961601..14961602,-;peakCounts:6558.3	39172	-	14961601	ENST00000228945.9	ENSG00000111348.9	promoter	ARHGDIB
0.290178	5.97366	7.76779	0.0053186	0.237061	rDPI_52899	chr9	129835268	129835282	chr9:129835268..129835282,chr9:129835143..129835364,-;peak:chr9:129835275..129835276,-;peakCounts:16058.7	36795	-	129835275	ENST00000372447.7	ENSG00000136819.15	promoter	C9orf78
0.365981	1.7446	7.76572	0.00532471	0.237171	rDPI_14197	chr13	49691466	49691471	chr13:49691466..49691471,chr13:49691437..49691529,-;peak:chr13:49691468..49691469,-;peakCounts:260.4	878	-	49691468	ENST00000378272.9	ENSG00000123179.14	alternative	EBPL
0.395475	1.43082	7.75831	0.00534659	0.237984	rDPI_5643	chr10	14838006	14838011	chr10:14838006..14838011,chr10:14837967..14838080,-;peak:chr10:14838008..14838009,-;peakCounts:206.3	584	-	14838008	ENST00000465530.2	ENSG00000185267.10	alternative	CDNF
0.383199	1.16034	7.75646	0.00535209	0.238066	rDPI_20639	chr17	1710372	1710378	chr17:1710372..1710378,chr17:1710302..1710404,-;peak:chr17:1710377..1710378,-;peakCounts:279.9	388	-	1710377	ENST00000330676.8	ENSG00000185561.10	alternative	TLCD2
-0.483984	1.10041	7.75124	0.00536756	0.238592	rDPI_19887	chr16	57668285	57668317	chr16:57668285..57668317,+	215	+	57668306	ENST00000565579.5	ENSG00000182885.17	promoter	ADGRG3
-1.09608	3.15623	7.74966	0.00537226	0.238627	rDPI_34062	chr21	8217035	8217037	chr21:8217035..8217037,chr21:8216947..8217080,+;peak:chr21:8217036..8217037,+;peakCounts:9427.5	16157	+	8217036	ENST00000612463.1	ENSG00000278233.1	not_classified	RNA5-8SN2
-1.48656	3.42934	7.74852	0.00537566	0.238627	rDPI_38769	chr3	186842705	186842712	chr3:186842705..186842712,chr3:186842616..186842736,+;peak:chr3:186842711..186842712,+;peakCounts:4141.8	6149	+	186842711	ENST00000320741.7	ENSG00000181092.10	promoter	ADIPOQ
-0.626351	1.191	7.74666	0.00538121	0.238711	rDPI_42817	chr5	134925969	134925993	chr5:134925969..134925993,-	258	-	134925975	ENST00000511037.1	ENSG00000248923.1	promoter	MTND5P11
0.423913	4.42606	7.74312	0.00539176	0.238918	rDPI_34190	chr21	17513046	17513048	chr21:17513046..17513048,chr21:17512939..17513125,+;peak:chr21:17513047..17513048,+;peakCounts:11266.2	12902	+	17513047	ENST00000400166.5	ENSG00000154639.19	promoter	CXADR
-0.352841	1.17236	7.74186	0.00539553	0.238918	rDPI_29164	chr2	96842617	96842624	chr2:96842617..96842624,chr2:96842567..96842746,-;peak:chr2:96842620..96842621,-;peakCounts:55.9	241	-	96842620	ENST00000476975.5	ENSG00000163126.15	alternative	ANKRD23
-0.299346	2.92142	7.74141	0.00539687	0.238918	rDPI_43253	chr5	150486285	150486319	chr5:150486285..150486319,chr5:150486182..150486350,+;peak:chr5:150486303..150486304,+;peakCounts:1073.7	4510	+	150486303	ENST00000519157.1	ENSG00000070614.15	alternative	NDST1
0.328416	6.26388	7.73882	0.00540461	0.239099	rDPI_39503	chr4	41990525	41990535	chr4:41990525..41990535,chr4:41990464..41990757,+;peak:chr4:41990530..41990531,+;peakCounts:39282.3	63118	+	41990530	ENST00000510460.1	ENSG00000014824.14	promoter	SLC30A9
0.449479	2.31358	7.73625	0.00541232	0.239278	rDPI_26329	chr19	40365894	40365899	chr19:40365894..40365899,chr19:40365813..40365911,+;peak:chr19:40365898..40365899,+;peakCounts:1138.4	2461	+	40365898	ENST00000493006.1	ENSG00000105223.20	alternative	PLD3
0.351687	4.32519	7.73475	0.00541681	0.239314	rDPI_38035	chr3	133573739	133573762	chr3:133573739..133573762,chr3:133573548..133574281,+;peak:chr3:133573745..133573746,+;peakCounts:6063	13401	+	133573745	ENST00000264993.8	ENSG00000091527.16	alternative	CDV3
-0.586829	1.4935	7.73222	0.0054244	0.239488	rDPI_10373	chr11	117203795	117203827	chr11:117203795..117203827,chr11:117203761..117203882,+;peak:chr11:117203818..117203819,+;peakCounts:76.7	862	+	117203818	ENST00000529622.1	ENSG00000149591.17	alternative	TAGLN
-0.385826	2.06114	7.72823	0.00543641	0.239747	rDPI_44092	chr6	12011978	12012004	chr6:12011978..12012004,chr6:12011923..12012056,+;peak:chr6:12011982..12011983,+;peakCounts:262.8	1646	+	12011982	ENST00000487103.5	ENSG00000095951.17	promoter	HIVEP1
-0.341501	2.27021	7.72783	0.00543761	0.239747	rDPI_27760	chr2	17540544	17540556	chr2:17540544..17540556,chr2:17540509..17540844,+;peak:chr2:17540545..17540546,+;peakCounts:145.3	1859	+	17540545	ENST00000451533.5	ENSG00000163032.12	alternative	VSNL1
-0.635104	2.34708	7.72547	0.00544472	0.239898	rDPI_28556	chr2	63604849	63604863	chr2:63604849..63604863,chr2:63604693..63604869,+;peak:chr2:63604860..63604861,+;peakCounts:548.1	2025	+	63604860	ENST00000495083.1	ENSG00000014641.21	enhancer	MDH1
-0.673252	1.57471	7.72388	0.00544951	0.239948	rDPI_17567	chr15	58279247	58279252	chr15:58279247..58279252,chr15:58279243..58279333,-;peak:chr15:58279247..58279248,-;peakCounts:635.4	841	-	58279247	ENST00000558231.5	ENSG00000128918.15	promoter	ALDH1A2
-0.615694	3.18936	7.72122	0.00545755	0.240067	rDPI_41124	chr4	185146844	185146855	chr4:185146844..185146855,chr4:185146799..185147140,+;peak:chr4:185146849..185146850,+;peakCounts:1732.5	3739	+	185146849	ENST00000491736.1	ENSG00000151729.11	alternative	SLC25A4
0.43172	1.40169	7.72041	0.00545999	0.240067	rDPI_19063	chr16	10622423	10622444	chr16:10622423..10622444,chr16:10622381..10622456,-;peak:chr16:10622437..10622438,-;peakCounts:135	561	-	10622437	ENST00000342147.4	ENSG00000213853.10	enhancer	EMP2
-0.388729	1.06306	7.71933	0.00546326	0.240067	rDPI_34479	chr21	41362029	41362031	chr21:41362029..41362031,chr21:41361937..41362037,+;peak:chr21:41362029..41362030,+;peakCounts:0	246	+	41362030	ENST00000495892.1	ENSG00000183486.14	promoter	MX2
-0.461585	2.12359	7.71654	0.00547171	0.240277	rDPI_40351	chr4	110476271	110476279	chr4:110476271..110476279,chr4:110476198..110476296,+;peak:chr4:110476278..110476279,+;peakCounts:1899.9	2724	+	110476278	ENST00000265162.10	ENSG00000138792.10	promoter	ENPEP
-0.504235	1.35825	7.71352	0.00548087	0.240517	rDPI_21654	chr17	36545036	36545039	chr17:36545036..36545039,chr17:36544878..36545092,+;peak:chr17:36545036..36545037,+;peakCounts:100.3	795	+	36545036	ENST00000618837.4	ENSG00000278311.5	alternative	GGNBP2
-0.365545	1.49747	7.71084	0.00548902	0.240713	rDPI_1686	chr1	50968801	50968813	chr1:50968801..50968813,chr1:50968775..50968858,+;peak:chr1:50968806..50968807,+;peakCounts:227.7	699	+	50968806	ENST00000396148.2	ENSG00000123080.12	promoter	CDKN2C
0.352523	1.40934	7.70415	0.00550939	0.241437	rDPI_18941	chr16	4212202	4212271	chr16:4212202..4212271,chr16:4212202..4212271,-	413	-	4212229	ENST00000537996.1	ENSG00000185739.13	enhancer	SRL
0.380699	3.51903	7.70299	0.00551293	0.241437	rDPI_6184	chr10	60300348	60300370	chr10:60300348..60300370,chr10:60300325..60300542,-;peak:chr10:60300360..60300361,-;peakCounts:1209.8	7792	-	60300360	ENST00000503925.1	ENSG00000151150.22	enhancer	ANK3
0.457255	0.941055	7.69804	0.00552807	0.241775	rDPI_34152	chr21	8443515	8443534	chr21:8443515..8443534,-	43	-	8443533	ENST00000627981.1	ENSG00000281181.1	alternative	NA
-0.525788	2.02536	7.69715	0.00553082	0.241775	rDPI_1122	chr1	31365862	31365871	chr1:31365862..31365871,chr1:31365732..31365947,-;peak:chr1:31365866..31365867,-;peakCounts:42.5	789	-	31365866	ENST00000497275.5	ENSG00000121769.8	alternative	FABP3
-0.386848	1.99889	7.69684	0.00553175	0.241775	rDPI_39156	chr4	3463335	3463350	chr4:3463335..3463350,chr4:3463218..3463440,+;peak:chr4:3463338..3463339,+;peakCounts:801.1	1879	+	3463338	ENST00000643608.1	ENSG00000175920.18	alternative	DOK7
-0.458881	0.956509	7.68948	0.00555437	0.242601	rDPI_21481	chr17	29390851	29390856	chr17:29390851..29390856,-	205	-	29390852	ENST00000577218.1	ENSG00000264808.1	promoter	NA
0.321109	1.58471	7.68811	0.00555857	0.242623	rDPI_34825	chr22	22508738	22508755	chr22:22508738..22508755,chr22:22508713..22508808,-;peak:chr22:22508742..22508743,-;peakCounts:225.9	629	-	22508742	ENST00000626650.3	ENSG00000275004.4	promoter	ZNF280B
0.430574	4.98212	7.68534	0.00556712	0.242724	rDPI_19351	chr16	28538940	28538951	chr16:28538940..28538951,chr16:28538903..28539087,-;peak:chr16:28538941..28538942,-;peakCounts:2848.1	16028	-	28538941	ENST00000567646.1	ENSG00000176046.9	alternative	NUPR1
0.498066	4.54836	7.68343	0.00557302	0.242724	rDPI_21566	chr17	32142523	32142555	chr17:32142523..32142555,chr17:32142400..32142681,+;peak:chr17:32142532..32142533,+;peakCounts:3298.5	15311	+	32142532	ENST00000354266.7	ENSG00000126858.19	promoter	RHOT1
-0.377342	1.99628	7.6828	0.00557496	0.242724	rDPI_52832	chr9	128920979	128920992	chr9:128920979..128920992,chr9:128920962..128921070,+;peak:chr9:128920982..128920983,+;peakCounts:464.4	1338	+	128920982	ENST00000372592.8	ENSG00000175287.19	promoter	PHYHD1
0.40044	3.1737	7.68209	0.00557716	0.242724	rDPI_25365	chr19	14070325	14070326	chr19:14070325..14070326,chr19:14070321..14070385,+;peak:chr19:14070325..14070326,+;peakCounts:26505	29450	+	14070325	ENST00000585891.1	ENSG00000228887.3	promoter	EEF1DP1
0.442167	4.45051	7.68134	0.00557947	0.242724	rDPI_10252	chr11	111910883	111910892	chr11:111910883..111910892,chr11:111910619..111911187,-;peak:chr11:111910891..111910892,-;peakCounts:3550.8	11133	-	111910891	ENST00000525823.1	ENSG00000109846.9	alternative	CRYAB
-0.435669	2.10092	7.67998	0.00558368	0.242745	rDPI_7713	chr10	128047607	128047621	chr10:128047607..128047621,chr10:128047512..128047662,+;peak:chr10:128047612..128047613,+;peakCounts:441	1421	+	128047612	ENST00000487428.1	ENSG00000132334.17	promoter	PTPRE
-0.451483	3.0932	7.66375	0.00563413	0.244776	rDPI_54621	chrX	115593541	115593559	chrX:115593541..115593559,chrX:115593471..115593613,+;peak:chrX:115593553..115593554,+;peakCounts:1686.6	4434	+	115593553	ENST00000481823.5	ENSG00000102024.18	promoter	PLS3
0.41645	3.58217	7.66233	0.00563855	0.244805	rDPI_7322	chr10	104254922	104254923	chr10:104254922..104254923,chr10:104254420..104255059,+;peak:chr10:104254922..104254923,+;peakCounts:2326.3	6896	+	104254922	ENST00000369713.10	ENSG00000148834.13	alternative	GSTO1
0.329625	1.61084	7.66057	0.00564407	0.244882	rDPI_13115	chr12	110689757	110689762	chr12:110689757..110689762,chr12:110689742..110689814,-;peak:chr12:110689757..110689758,-;peakCounts:216.1	747	-	110689757	ENST00000439744.6	ENSG00000122986.14	alternative	HVCN1
0.245997	4.91244	7.65803	0.00565202	0.24495	rDPI_6423	chr10	72626075	72626085	chr10:72626075..72626085,chr10:72626033..72626159,-;peak:chr10:72626079..72626080,-;peakCounts:7882.2	13577	-	72626079	ENST00000361114.10	ENSG00000107745.19	promoter	MICU1
0.32977	1.99326	7.6564	0.00565713	0.24495	rDPI_52179	chr9	101487081	101487086	chr9:101487081..101487086,chr9:101486971..101487255,-;peak:chr9:101487083..101487084,-;peakCounts:562.2	1108	-	101487083	ENST00000374847.5	ENSG00000165152.9	alternative	PGAP4
-0.378215	1.42405	7.65533	0.00566048	0.24495	rDPI_14682	chr14	20801997	20802013	chr14:20801997..20802013,chr14:20801533..20802015,-;peak:chr14:20802007..20802008,-;peakCounts:158.4	595	-	20802007	ENST00000412779.2	ENSG00000129538.14	enhancer	RNASE1
-0.488793	1.48595	7.65474	0.00566233	0.24495	rDPI_1058	chr1	28247198	28247219	chr1:28247198..28247219,chr1:28247186..28247244,-;peak:chr1:28247214..28247215,-;peakCounts:179.1	601	-	28247214	ENST00000604716.1	ENSG00000270605.1	promoter	NA
0.245709	3.34922	7.65408	0.0056644	0.24495	rDPI_31837	chr2	203239013	203239027	chr2:203239013..203239027,chr2:203238936..203239041,+;peak:chr2:203239018..203239019,+;peakCounts:3099.6	7989	+	203239018	ENST00000356079.9	ENSG00000119004.16	promoter	CYP20A1
0.365781	1.06475	7.64761	0.00568475	0.245667	rDPI_49490	chr8	19506520	19506537	chr8:19506520..19506537,-	196	-	19506531	ENST00000518542.1	ENSG00000147408.14	enhancer	CSGALNACT1
-0.361529	4.68267	7.63947	0.00571048	0.246616	rDPI_34656	chr22	17159274	17159278	chr22:17159274..17159278,chr22:17159153..17159295,-;peak:chr22:17159277..17159278,-;peakCounts:11461.5	13944	-	17159277	ENST00000336737.8	ENSG00000069998.12	promoter	HDHD5
-0.347235	2.30339	7.63653	0.00571978	0.246854	rDPI_10105	chr11	102110404	102110410	chr11:102110404..102110410,chr11:102110204..102110850,+;peak:chr11:102110404..102110405,+;peakCounts:127.5	2030	+	102110404	ENST00000282441.10	ENSG00000137693.14	alternative	YAP1
0.588576	1.17714	7.63364	0.00572896	0.246941	rDPI_50642	chr8	110556291	110556295	chr8:110556291..110556295,+	208	+	110556291	ENST00000523800.1	ENSG00000253107.1	enhancer	LOC100132280
0.384029	0.916954	7.63297	0.00573107	0.246941	rDPI_10714	chr11	131909924	131909930	chr11:131909924..131909930,+	129	+	131909925	ENST00000498764.5	ENSG00000182667.14	enhancer	NTM
0.435008	1.91209	7.63232	0.00573314	0.246941	rDPI_26875	chr19	48646175	48646193	chr19:48646175..48646193,chr19:48645988..48646248,-;peak:chr19:48646187..48646188,-;peakCounts:372.6	1247	-	48646187	ENST00000084798.9	ENSG00000063180.9	alternative	CA11
-0.915664	2.50247	7.63008	0.00574028	0.247086	rDPI_5048	chr1	229433036	229433045	chr1:229433036..229433045,chr1:229432988..229433170,-;peak:chr1:229433040..229433041,-;peakCounts:318.3	1856	-	229433040	ENST00000366684.7	ENSG00000143632.14	alternative	ACTA1
0.346922	4.73309	7.62802	0.00574684	0.247205	rDPI_34519	chr21	43776324	43776330	chr21:43776324..43776330,chr21:43776217..43776469,-;peak:chr21:43776326..43776327,-;peakCounts:4453.3	17544	-	43776326	ENST00000675996.1	ENSG00000160213.9	alternative	CSTB
-0.2939	2.70794	7.62378	0.00576035	0.247623	rDPI_53155	chr9	136847999	136848008	chr9:136847999..136848008,chr9:136847882..136848084,+;peak:chr9:136848002..136848003,+;peakCounts:1235.1	2954	+	136848002	ENST00000371661.5	ENSG00000054148.18	alternative	PHPT1
0.285819	2.03138	7.61733	0.00578101	0.248348	rDPI_10174	chr11	108009335	108009342	chr11:108009335..108009342,chr11:108009263..108009359,+;peak:chr11:108009338..108009339,+;peakCounts:874.8	1658	+	108009338	ENST00000531427.5	ENSG00000166266.14	alternative	CUL5
-0.350958	3.48947	7.60785	0.00581146	0.249492	rDPI_34654	chr22	17159256	17159259	chr22:17159256..17159259,chr22:17159153..17159295,-;peak:chr22:17159257..17159258,-;peakCounts:4351.5	5729	-	17159257	ENST00000399852.3	ENSG00000069998.12	alternative	HDHD5
0.430692	1.9749	7.60593	0.00581765	0.249504	rDPI_28437	chr2	55112609	55112617	chr2:55112609..55112617,chr2:55112596..55112662,-;peak:chr2:55112612..55112613,-;peakCounts:737.1	1045	-	55112612	ENST00000427710.5	ENSG00000115310.18	promoter	RTN4
-0.329545	1.88982	7.60539	0.00581939	0.249504	rDPI_13945	chr13	33676775	33676787	chr13:33676775..33676787,chr13:33676711..33676837,-;peak:chr13:33676782..33676783,-;peakCounts:333.1	1220	-	33676782	ENST00000653421.1	ENSG00000230490.3	alternative	NA
0.342276	1.42914	7.59572	0.00585069	0.250681	rDPI_51212	chr9	4490206	4490231	chr9:4490206..4490231,chr9:4490156..4490281,+;peak:chr9:4490216..4490217,+;peakCounts:235.8	713	+	4490216	ENST00000262352.8	ENSG00000106688.12	alternative	SLC1A1
-0.882968	1.6585	7.59166	0.00586391	0.250981	rDPI_27193	chr19	53538425	53538432	chr19:53538425..53538432,chr19:53538092..53538432,+;peak:chr19:53538431..53538432,+;peakCounts:411.9	1040	+	53538431	ENST00000648122.1	ENSG00000130844.19	alternative	ZNF331
0.56017	2.79513	7.59121	0.00586537	0.250981	rDPI_20747	chr17	4584524	4584534	chr17:4584524..4584534,chr17:4584475..4584571,+;peak:chr17:4584529..4584530,+;peakCounts:2660.4	3718	+	4584529	ENST00000389313.9	ENSG00000188176.12	promoter	SMTNL2
-0.396554	1.75741	7.58191	0.00589568	0.251857	rDPI_24535	chr19	2271878	2271905	chr19:2271878..2271905,chr19:2271786..2271945,+;peak:chr19:2271900..2271901,+;peakCounts:177.3	902	+	2271900	ENST00000592727.3	ENSG00000104904.12	enhancer	OAZ1
0.308698	2.29017	7.58148	0.00589709	0.251857	rDPI_25233	chr19	12722282	12722292	chr19:12722282..12722292,chr19:12722199..12722305,-;peak:chr19:12722291..12722292,-;peakCounts:1003	2214	-	12722291	ENST00000586775.5	ENSG00000105576.15	alternative	TNPO2
-0.441952	2.37074	7.58131	0.00589765	0.251857	rDPI_21251	chr17	17237146	17237153	chr17:17237146..17237153,chr17:17237103..17237215,-;peak:chr17:17237149..17237150,-;peakCounts:1116.4	2177	-	17237149	ENST00000389169.9	ENSG00000154803.13	alternative	FLCN
0.404617	7.80647	7.58021	0.00590127	0.251857	rDPI_2967	chr1	149886526	149886701	chr1:149886526..149886701,chr1:149886526..149886701,-	111136	-	149886682	ENST00000369155.3	ENSG00000184678.10	promoter	H2BC21
-0.46667	6.70052	7.57486	0.00591881	0.252334	rDPI_3570	chr1	159925498	159925511	chr1:159925498..159925511,chr1:159925454..159925559,-;peak:chr1:159925507..159925508,-;peakCounts:14722.2	48489	-	159925507	ENST00000368097.9	ENSG00000158710.15	promoter	TAGLN2
0.332084	2.14465	7.5742	0.00592097	0.252334	rDPI_43828	chr5	180861253	180861265	chr5:180861253..180861265,chr5:180861212..180861319,-;peak:chr5:180861259..180861260,-;peakCounts:717.3	1689	-	180861259	ENST00000506439.5	ENSG00000196670.14	alternative	ZFP62
-0.324797	1.54376	7.57221	0.00592751	0.252334	rDPI_20028	chr16	67159970	67159977	chr16:67159970..67159977,chr16:67159912..67160033,+;peak:chr16:67159973..67159974,+;peakCounts:335.7	899	+	67159973	ENST00000517382.5	ENSG00000135722.9	alternative	FBXL8
-1.19216	8.57897	7.57209	0.0059279	0.252334	rDPI_7028	chr10	97572473	97572908	chr10:97572473..97572908,chr10:97572473..97572908,+	304686	+	97572779	ENST00000298808.9	ENSG00000165887.12	promoter	ANKRD2
0.707168	8.26717	7.56558	0.00594935	0.25295	rDPI_24853	chr19	6720561	6720703	chr19:6720561..6720703,chr19:6720561..6720703,-	140516	-	6720650	ENST00000245907.11	ENSG00000125730.17	promoter	C3
-0.448702	1.07569	7.56535	0.00595012	0.25295	rDPI_436	chr1	11857669	11857672	chr1:11857669..11857672,chr1:11857558..11857680,-;peak:chr1:11857671..11857672,-;peakCounts:25.7	150	-	11857671	ENST00000376468.4	ENSG00000120937.9	alternative	NPPB
0.293818	4.59499	7.56323	0.00595711	0.253082	rDPI_51171	chr9	2015339	2015357	chr9:2015339..2015357,chr9:2015235..2015389,+;peak:chr9:2015348..2015349,+;peakCounts:6723.9	15298	+	2015348	ENST00000634536.1	ENSG00000080503.24	promoter	SMARCA2
0.362537	1.13556	7.5611	0.00596417	0.253217	rDPI_3003	chr1	150257819	150257833	chr1:150257819..150257833,chr1:150257774..150257953,+;peak:chr1:150257827..150257828,+;peakCounts:136.2	322	+	150257827	ENST00000582010.3	ENSG00000118298.12	alternative	CA14
-0.781923	1.49199	7.55771	0.00597539	0.253408	rDPI_34142	chr21	8442343	8442346	chr21:8442343..8442346,chr21:8442286..8442403,+;peak:chr21:8442344..8442345,+;peakCounts:305.5	1071	+	8442344	ENST00000619471.1	ENSG00000278189.1	alternative	RNA5-8SN1
0.291478	2.07144	7.5574	0.00597642	0.253408	rDPI_48184	chr7	100612458	100612474	chr7:100612458..100612474,chr7:100612434..100612493,+;peak:chr7:100612466..100612467,+;peakCounts:428.4	1644	+	100612466	ENST00000379527.6	ENSG00000106330.12	alternative	MOSPD3
0.30537	2.46816	7.55531	0.00598336	0.253521	rDPI_14706	chr14	21437268	21437281	chr14:21437268..21437281,chr14:21437200..21437319,-;peak:chr14:21437275..21437276,-;peakCounts:675.1	1962	-	21437275	ENST00000557364.6	ENSG00000100888.15	alternative	CHD8
0.361795	1.02795	7.55425	0.00598686	0.253521	rDPI_54446	chrX	102125650	102125654	chrX:102125650..102125654,chrX:102125616..102125702,+;peak:chrX:102125650..102125651,+;peakCounts:72.9	146	+	102125650	ENST00000372780.6	ENSG00000184905.9	alternative	TCEAL2
-0.391339	1.76076	7.55144	0.00599622	0.253753	rDPI_53613	chrX	12976965	12976976	chrX:12976965..12976976,chrX:12976921..12977054,+;peak:chrX:12976970..12976971,+;peakCounts:327.6	633	+	12976970	ENST00000380633.1	ENSG00000205542.11	alternative	TMSB4X
-0.442292	1.82831	7.54761	0.00600897	0.253811	rDPI_35350	chr22	38505986	38505989	chr22:38505986..38505989,chr22:38505934..38506097,-;peak:chr22:38505986..38505987,-;peakCounts:518.4	665	-	38505986	ENST00000467279.1	ENSG00000100201.23	alternative	DDX17
0.273444	4.59173	7.54654	0.00601254	0.253811	rDPI_4402	chr1	202958277	202958283	chr1:202958277..202958283,chr1:202958184..202958398,-;peak:chr1:202958280..202958281,-;peakCounts:7754.7	12382	-	202958280	ENST00000426229.1	ENSG00000159346.13	alternative	ADIPOR1
-0.608476	4.11836	7.54561	0.00601565	0.253811	rDPI_20048	chr16	67393498	67393499	chr16:67393498..67393499,chr16:67393422..67393547,-;peak:chr16:67393498..67393499,-;peakCounts:7182	7980	-	67393498	ENST00000393957.7	ENSG00000159713.11	promoter	TPPP3
-0.305091	2.47019	7.54523	0.00601691	0.253811	rDPI_20497	chr16	89657673	89657677	chr16:89657673..89657677,chr16:89657638..89657738,-;peak:chr16:89657675..89657676,-;peakCounts:834.3	2235	-	89657675	ENST00000551981.6	ENSG00000131165.16	alternative	CHMP1A
-0.389462	1.2856	7.54348	0.00602277	0.253811	rDPI_26674	chr19	45779331	45779339	chr19:45779331..45779339,chr19:45779262..45779364,-;peak:chr19:45779334..45779335,-;peakCounts:210.6	371	-	45779334	ENST00000599392.1	ENSG00000104936.19	enhancer	DMPK
0.452148	0.968784	7.54305	0.0060242	0.253811	rDPI_11371	chr12	22082521	22082546	chr12:22082521..22082546,-	65	-	22082527	ENST00000536535.1	ENSG00000111728.11	enhancer	ST8SIA1
-0.411177	2.52938	7.54287	0.0060248	0.253811	rDPI_960	chr1	26432398	26432408	chr1:26432398..26432408,chr1:26432287..26432496,+;peak:chr1:26432403..26432404,+;peakCounts:1786.1	3499	+	26432403	ENST00000529688.5	ENSG00000117682.17	alternative	DHDDS
-0.334284	1.82115	7.53823	0.00604033	0.254205	rDPI_32350	chr2	226799758	226799773	chr2:226799758..226799773,chr2:226799612..226799877,-;peak:chr2:226799767..226799768,-;peakCounts:518	1147	-	226799767	ENST00000305123.6	ENSG00000169047.6	alternative	IRS1
-0.312702	2.09931	7.53715	0.00604397	0.254205	rDPI_49345	chr8	11677002	11677021	chr8:11677002..11677021,chr8:11676898..11677033,+;peak:chr8:11677008..11677009,+;peakCounts:388	2376	+	11677008	ENST00000532977.1	ENSG00000136574.18	promoter	GATA4
0.368363	2.97036	7.53659	0.00604582	0.254205	rDPI_26930	chr19	49114392	49114400	chr19:49114392..49114400,chr19:49114329..49114433,+;peak:chr19:49114395..49114396,+;peakCounts:1472.8	3883	+	49114395	ENST00000595200.5	ENSG00000104863.12	alternative	LIN7B
0.3195	1.6191	7.53168	0.00606234	0.254735	rDPI_3620	chr1	160400583	160400595	chr1:160400583..160400595,chr1:160400552..160400617,+;peak:chr1:160400586..160400587,+;peakCounts:403.2	1103	+	160400586	ENST00000368061.3	ENSG00000162738.6	promoter	VANGL2
-0.440288	1.28943	7.52993	0.00606823	0.254819	rDPI_9517	chr11	66192490	66192507	chr11:66192490..66192507,chr11:66192305..66192531,+;peak:chr11:66192500..66192501,+;peakCounts:196.2	479	+	66192500	ENST00000531298.5	ENSG00000175115.13	enhancer	PACS1
0.314625	2.55794	7.52798	0.00607481	0.254931	rDPI_5196	chr1	236524018	236524024	chr1:236524018..236524024,chr1:236523871..236524085,+;peak:chr1:236524021..236524022,+;peakCounts:677.1	2297	+	236524021	ENST00000434231.6	ENSG00000116977.19	alternative	LGALS8
0.516916	4.41095	7.52678	0.00607884	0.254937	rDPI_38386	chr3	158571217	158571223	chr3:158571217..158571223,chr3:158571118..158571403,+;peak:chr3:158571222..158571223,+;peakCounts:2408.9	11395	+	158571222	ENST00000498592.6	ENSG00000178053.20	alternative	MLF1
-1.0753	8.33148	7.52239	0.00609369	0.255395	rDPI_32014	chr2	215435669	215436173	chr2:215435669..215436173,chr2:215435669..215436173,-	192006	-	215436068	ENST00000421182.5	ENSG00000115414.21	promoter	FN1
-0.632796	1.01143	7.51961	0.00610308	0.255427	rDPI_20836	chr17	5116348	5116373	chr17:5116348..5116373,chr17:5116298..5116427,-;peak:chr17:5116369..5116370,-;peakCounts:26.5	166	-	5116369	ENST00000574735.1	ENSG00000167840.13	promoter	ZNF232
-0.437262	1.54781	7.51826	0.00610767	0.255427	rDPI_16542	chr14	102083169	102083193	chr14:102083169..102083193,chr14:102083083..102083237,-;peak:chr14:102083176..102083177,-;peakCounts:168.5	781	-	102083176	ENST00000557089.1	ENSG00000080824.19	alternative	HSP90AA1
0.463834	3.45423	7.51729	0.00611096	0.255427	rDPI_4775	chr1	219174157	219174177	chr1:219174157..219174177,chr1:219174105..219174287,+;peak:chr1:219174171..219174172,+;peakCounts:1982.7	6515	+	219174171	ENST00000469590.5	ENSG00000143353.12	alternative	LYPLAL1
-0.484446	1.5539	7.51694	0.00611215	0.255427	rDPI_28494	chr2	61177418	61177423	chr2:61177418..61177423,chr2:61177386..61177571,+;peak:chr2:61177418..61177419,+;peakCounts:556.5	1120	+	61177418	ENST00000357022.6	ENSG00000173209.23	alternative	AHSA2P
-0.344439	1.34724	7.51639	0.00611401	0.255427	rDPI_41329	chr5	6713484	6713492	chr5:6713484..6713492,chr5:6713389..6713519,+;peak:chr5:6713491..6713492,+;peakCounts:520.1	783	+	6713491	ENST00000230859.8	ENSG00000112941.14	alternative	TENT4A
-0.382592	2.49479	7.51459	0.00612011	0.255518	rDPI_40631	chr4	140373381	140373392	chr4:140373381..140373392,chr4:140373307..140373436,-;peak:chr4:140373386..140373387,-;peakCounts:1515	2404	-	140373386	ENST00000512692.7	ENSG00000196951.11	alternative	SCOC-AS1
-0.367687	3.82796	7.51271	0.00612652	0.255569	rDPI_7014	chr10	97426186	97426197	chr10:97426186..97426197,chr10:97426090..97426258,+;peak:chr10:97426191..97426192,+;peakCounts:4445	8309	+	97426191	ENST00000334828.6	ENSG00000171314.9	alternative	PGAM1
-1.18301	4.54534	7.51115	0.0061318	0.255569	rDPI_5044	chr1	229432811	229432845	chr1:229432811..229432845,chr1:229432556..229432895,-;peak:chr1:229432818..229432819,-;peakCounts:2804.6	13016	-	229432818	ENST00000366684.7	ENSG00000143632.14	alternative	ACTA1
0.404325	4.95332	7.51079	0.00613306	0.255569	rDPI_38285	chr3	150546787	150546790	chr3:150546787..150546790,chr3:150546646..150546822,+;peak:chr3:150546788..150546789,+;peakCounts:12601.8	20956	+	150546788	ENST00000406576.7	ENSG00000144895.12	promoter	EIF2A
-0.413089	1.43364	7.50611	0.006149	0.25607	rDPI_52512	chr9	121317195	121317201	chr9:121317195..121317201,chr9:121317083..121317215,+;peak:chr9:121317200..121317201,+;peakCounts:216.2	599	+	121317200	ENST00000373807.5	ENSG00000148180.21	alternative	GSN
-0.450876	1.13919	7.50412	0.00615579	0.256071	rDPI_27718	chr2	10869273	10869284	chr2:10869273..10869284,chr2:10869266..10869368,+;peak:chr2:10869274..10869275,+;peakCounts:150.3	338	+	10869274	ENST00000652896.1	ENSG00000271952.2	promoter	LINC01954
-0.349488	4.8646	7.50381	0.00615687	0.256071	rDPI_32514	chr2	237627605	237627616	chr2:237627605..237627616,chr2:237627538..237627714,+;peak:chr2:237627610..237627611,+;peakCounts:7888.5	19933	+	237627610	ENST00000465870.5	ENSG00000124831.19	promoter	LRRFIP1
-0.340846	3.00606	7.50252	0.00616128	0.256091	rDPI_53270	chr9	137578892	137578905	chr9:137578892..137578905,chr9:137578830..137578937,-;peak:chr9:137578900..137578901,-;peakCounts:1569.6	3879	-	137578900	ENST00000475100.5	ENSG00000148399.13	promoter	DPH7
-0.447768	1.15637	7.49942	0.00617187	0.256368	rDPI_9381	chr11	65424984	65424998	chr11:65424984..65424998,chr11:65424501..65425104,+;peak:chr11:65424989..65424990,+;peakCounts:130.2	502	+	65424989	ENST00000616315.2	ENSG00000245532.9	alternative	NEAT1
-0.437918	1.20013	7.49484	0.00618761	0.256848	rDPI_17948	chr15	72208785	72208794	chr15:72208785..72208794,chr15:72208619..72208899,-;peak:chr15:72208789..72208790,-;peakCounts:48	288	-	72208789	ENST00000563275.1	ENSG00000067225.19	alternative	PKM
0.429698	4.99782	7.49275	0.0061948	0.256848	rDPI_54478	chrX	103255146	103255161	chrX:103255146..103255161,chrX:103255093..103255222,-;peak:chrX:103255151..103255152,-;peakCounts:6057.9	16972	-	103255151	ENST00000372685.8	ENSG00000180964.17	promoter	TCEAL8
0.506698	3.55007	7.49263	0.00619521	0.256848	rDPI_19059	chr16	10580597	10580603	chr16:10580597..10580603,chr16:10580562..10580736,-;peak:chr16:10580597..10580598,-;peakCounts:2629.7	5829	-	10580597	ENST00000359543.8	ENSG00000213853.10	alternative	EMP2
-0.359791	3.19532	7.49008	0.00620396	0.256924	rDPI_9306	chr11	64917182	64917275	chr11:64917182..64917275,chr11:64917182..64917275,-	4951	-	64917209	ENST00000377264.8	ENSG00000110046.13	promoter	ATG2A
-0.535231	2.03037	7.48876	0.00620851	0.256924	rDPI_43744	chr5	179345448	179345467	chr5:179345448..179345467,chr5:179345340..179345502,-;peak:chr5:179345461..179345462,-;peakCounts:448.1	1586	-	179345461	ENST00000251582.12	ENSG00000087116.16	promoter	ADAMTS2
0.279184	2.44469	7.48867	0.00620885	0.256924	rDPI_23874	chr18	35241046	35241050	chr18:35241046..35241050,chr18:35240996..35241140,+;peak:chr18:35241046..35241047,+;peakCounts:675.6	2956	+	35241046	ENST00000589420.1	ENSG00000186812.13	alternative	ZNF397
-0.442871	1.40603	7.48564	0.00621931	0.256984	rDPI_36746	chr3	48605796	48605806	chr3:48605796..48605806,chr3:48605777..48605861,-;peak:chr3:48605802..48605803,-;peakCounts:191.7	491	-	48605802	ENST00000472438.5	ENSG00000010256.11	alternative	UQCRC1
-0.368889	4.40198	7.48547	0.00621987	0.256984	rDPI_31767	chr2	201118789	201118809	chr2:201118789..201118809,chr2:201118620..201118893,+;peak:chr2:201118803..201118804,+;peakCounts:4125.4	12730	+	201118803	ENST00000439154.6	ENSG00000003402.20	enhancer	CFLAR
0.404054	1.71333	7.48462	0.00622283	0.256984	rDPI_48745	chr7	131107027	131107038	chr7:131107027..131107038,-	866	-	131107030	ENST00000433079.5	ENSG00000231721.7	promoter	LINC-PINT
-0.326486	2.73069	7.48369	0.00622604	0.256984	rDPI_37063	chr3	52705732	52705741	chr3:52705732..52705741,chr3:52705534..52705820,-;peak:chr3:52705737..52705738,-;peakCounts:749.5	2287	-	52705737	ENST00000487642.5	ENSG00000016864.19	alternative	GLT8D1
0.322378	4.07048	7.47811	0.00624536	0.257484	rDPI_13559	chr12	123972717	123972733	chr12:123972717..123972733,chr12:123972538..123972943,-;peak:chr12:123972727..123972728,-;peakCounts:2481.7	7859	-	123972727	ENST00000545891.5	ENSG00000119242.9	alternative	CCDC92
0.452271	4.48921	7.47791	0.00624605	0.257484	rDPI_50310	chr8	86508743	86508759	chr8:86508743..86508759,chr8:86508620..86508803,-;peak:chr8:86508751..86508752,-;peakCounts:5820.9	18647	-	86508751	ENST00000406452.8	ENSG00000176623.12	alternative	RMDN1
-0.309722	3.65932	7.47336	0.00626187	0.257773	rDPI_36106	chr3	16265209	16265227	chr3:16265209..16265227,chr3:16265164..16265269,+;peak:chr3:16265214..16265215,+;peakCounts:1665	6700	+	16265214	ENST00000435829.6	ENSG00000154814.14	promoter	OXNAD1
-0.533514	2.63942	7.4729	0.00626344	0.257773	rDPI_54861	chrX	136204919	136204924	chrX:136204919..136204924,chrX:136204854..136204936,+;peak:chrX:136204921..136204922,+;peakCounts:2021.8	3862	+	136204921	ENST00000477080.1	ENSG00000022267.19	alternative	FHL1
-0.557011	1.32602	7.47167	0.00626774	0.257773	rDPI_54894	chrX	136210959	136210970	chrX:136210959..136210970,chrX:136209871..136211144,+;peak:chrX:136210964..136210965,+;peakCounts:196.8	477	+	136210964	ENST00000630677.1	ENSG00000022267.19	alternative	FHL1
-0.450421	1.13091	7.47122	0.00626929	0.257773	rDPI_25972	chr19	35654637	35654642	chr19:35654637..35654642,chr19:35654568..35654660,+;peak:chr19:35654641..35654642,+;peakCounts:74.5	214	+	35654641	ENST00000590618.1	ENSG00000126267.11	alternative	COX6B1
0.465458	1.73507	7.46873	0.00627799	0.257773	rDPI_45497	chr6	82169329	82169338	chr6:82169329..82169338,chr6:82169269..82169376,-;peak:chr6:82169334..82169335,-;peakCounts:384.3	1054	-	82169334	ENST00000667666.1	ENSG00000226453.2	promoter	NA
0.368073	1.96765	7.46828	0.00627955	0.257773	rDPI_54456	chrX	102651479	102651494	chrX:102651479..102651494,chrX:102651327..102651623,+;peak:chrX:102651483..102651484,+;peakCounts:476.1	1395	+	102651483	ENST00000537097.2	ENSG00000198932.13	alternative	GPRASP1
-0.348984	2.60132	7.4673	0.00628296	0.257773	rDPI_11585	chr12	45992049	45992065	chr12:45992049..45992065,chr12:45991976..45992165,-;peak:chr12:45992059..45992060,-;peakCounts:1261.8	2627	-	45992059	ENST00000547018.5	ENSG00000139218.18	promoter	SCAF11
0.401185	1.31567	7.46682	0.00628464	0.257773	rDPI_5524	chr10	5895131	5895135	chr10:5895131..5895135,+	647	+	5895132	ENST00000379999.6	ENSG00000134452.20	enhancer	FBH1
-0.330253	2.68937	7.46338	0.00629667	0.258104	rDPI_12562	chr12	89708830	89708837	chr12:89708830..89708837,chr12:89708798..89708881,-;peak:chr12:89708831..89708832,-;peakCounts:992.7	2508	-	89708831	ENST00000428670.8	ENSG00000070961.16	promoter	ATP2B1
0.338934	1.38601	7.46054	0.00630662	0.25835	rDPI_18412	chr15	90201326	90201336	chr15:90201326..90201336,chr15:90201302..90201380,+;peak:chr15:90201330..90201331,+;peakCounts:523.8	808	+	90201330	ENST00000411539.6	ENSG00000185033.14	promoter	SEMA4B
-0.470239	1.2684	7.45857	0.00631352	0.25847	rDPI_5545	chr10	7541456	7541471	chr10:7541456..7541471,chr10:7541342..7541562,+;peak:chr10:7541461..7541462,+;peakCounts:188.9	491	+	7541461	ENST00000414631.1	ENSG00000230121.1	alternative	NA
0.290093	2.73626	7.45696	0.00631917	0.258508	rDPI_6422	chr10	72626058	72626060	chr10:72626058..72626060,chr10:72626033..72626159,-;peak:chr10:72626058..72626059,-;peakCounts:1298.2	3248	-	72626058	ENST00000604025.1	ENSG00000107745.19	alternative	MICU1
0.292944	5.75094	7.45409	0.00632923	0.258508	rDPI_2872	chr1	145964712	145964724	chr1:145964712..145964724,chr1:145964661..145964757,+;peak:chr1:145964717..145964718,+;peakCounts:11466	33115	+	145964717	ENST00000471706.1	ENSG00000121851.13	promoter	POLR3GL
0.396862	2.71181	7.45126	0.00633919	0.258508	rDPI_33117	chr20	30377202	30377224	chr20:30377202..30377224,chr20:30377164..30377316,+;peak:chr20:30377216..30377217,+;peakCounts:952.2	4198	+	30377216	ENST00000278882.8	ENSG00000149531.15	enhancer	NA
0.347565	1.67278	7.44912	0.00634674	0.258508	rDPI_8514	chr11	33258249	33258255	chr11:33258249..33258255,chr11:33258220..33258646,+;peak:chr11:33258249..33258250,+;peakCounts:109.4	1033	+	33258249	ENST00000531504.5	ENSG00000110422.12	alternative	HIPK3
-0.497569	1.69815	7.44824	0.00634984	0.258508	rDPI_48699	chr7	128858795	128858828	chr7:128858795..128858828,chr7:128858654..128858995,+;peak:chr7:128858819..128858820,+;peakCounts:125.1	1101	+	128858819	ENST00000249289.5	ENSG00000128524.5	enhancer	ATP6V1F
0.340877	1.91368	7.44712	0.0063538	0.258508	rDPI_54460	chrX	102712411	102712422	chrX:102712411..102712422,chrX:102712329..102712521,+;peak:chrX:102712416..102712417,+;peakCounts:666.2	1173	+	102712416	ENST00000483720.5	ENSG00000158301.18	alternative	GPRASP2
0.605591	1.45938	7.44649	0.00635605	0.258508	rDPI_17987	chr15	73376161	73376178	chr15:73376161..73376178,chr15:73376093..73376245,+;peak:chr15:73376166..73376167,+;peakCounts:391.9	860	+	73376166	ENST00000557981.1	ENSG00000259650.1	enhancer	NA
-0.42165	1.77539	7.44645	0.00635617	0.258508	rDPI_35460	chr22	41197440	41197452	chr22:41197440..41197452,chr22:41197368..41197520,-;peak:chr22:41197447..41197448,-;peakCounts:521.1	880	-	41197447	ENST00000420537.1	ENSG00000231993.1	alternative	NA
-0.551613	0.954135	7.44602	0.00635767	0.258508	rDPI_34117	chr21	8400270	8400291	chr21:8400270..8400291,+	166	+	8400271	ENST00000613359.1	ENSG00000275215.1	alternative	RNA5-8SN3
-0.545096	1.08065	7.44594	0.00635796	0.258508	rDPI_3695	chr1	161631153	161631164	chr1:161631153..161631164,chr1:161631153..161631211,-;peak:chr1:161631158..161631159,-;peakCounts:71.6	182	-	161631158	ENST00000421702.3	ENSG00000162747.12	alternative	FCGR3B
0.408327	10.0268	7.44493	0.00636153	0.258508	rDPI_50041	chr8	56074506	56074508	chr8:56074506..56074508,chr8:56074377..56074582,-;peak:chr8:56074506..56074507,-;peakCounts:565564.5	657949	-	56074506	ENST00000676461.1	ENSG00000008988.11	promoter	RPS20
0.796029	2.17061	7.44482	0.00636194	0.258508	rDPI_33452	chr20	38926417	38926418	chr20:38926417..38926418,+	1833	+	38926417	ENST00000619850.2	ENSG00000101447.15	promoter	FAM83D
0.456995	1.429	7.44059	0.00637691	0.258955	rDPI_3132	chr1	151728316	151728325	chr1:151728316..151728325,chr1:151728245..151728391,+;peak:chr1:151728319..151728320,+;peakCounts:236.2	840	+	151728319	ENST00000451222.5	ENSG00000178796.13	alternative	RIIAD1
-0.45775	1.1382	7.43049	0.0064128	0.26025	rDPI_46181	chr6	140898380	140898387	chr6:140898380..140898387,chr6:140898379..140898438,-;peak:chr6:140898381..140898382,-;peakCounts:219.3	338	-	140898381	ENST00000650553.1	ENSG00000285875.1	alternative	NA
-0.637192	2.67112	7.42741	0.00642379	0.260502	rDPI_20365	chr16	83953222	83953285	chr16:83953222..83953285,chr16:83953222..83953285,+	3268	+	83953240	ENST00000565123.5	ENSG00000140961.14	promoter	OSGIN1
-0.551559	1.42544	7.42409	0.00643563	0.260502	rDPI_46796	chr7	5529234	5529245	chr7:5529234..5529245,chr7:5529152..5529383,-;peak:chr7:5529239..5529240,-;peakCounts:242.6	502	-	5529239	ENST00000642480.2	ENSG00000075624.17	alternative	ACTB
0.414328	4.24525	7.42195	0.00644331	0.260502	rDPI_39843	chr4	75724578	75724584	chr4:75724578..75724584,chr4:75724511..75724816,+;peak:chr4:75724578..75724579,+;peakCounts:4944.4	13865	+	75724578	ENST00000514213.7	ENSG00000138768.15	alternative	USO1
-0.558735	2.33809	7.42137	0.00644536	0.260502	rDPI_29185	chr2	97647064	97647076	chr2:97647064..97647076,chr2:97647061..97647138,+;peak:chr2:97647068..97647069,+;peakCounts:339.3	1629	+	97647068	ENST00000494306.1	ENSG00000135940.7	not_classified	COX5B
-0.593061	3.7278	7.42093	0.00644697	0.260502	rDPI_20414	chr16	85805049	85805061	chr16:85805049..85805061,chr16:85804932..85805103,+;peak:chr16:85805060..85805061,+;peakCounts:2750.4	5109	+	85805060	ENST00000562929.1	ENSG00000131143.10	promoter	COX4I1
-0.454404	1.05376	7.42025	0.00644939	0.260502	rDPI_44612	chr6	31817412	31817439	chr6:31817412..31817439,chr6:31817393..31817468,+;peak:chr6:31817435..31817436,+;peakCounts:83.7	622	+	31817435	ENST00000608703.1	ENSG00000204389.10	alternative	HSPA1A
-0.54116	1.11671	7.41929	0.00645284	0.260502	rDPI_38106	chr3	138010165	138010171	chr3:138010165..138010171,chr3:138010097..138010401,+;peak:chr3:138010165..138010166,+;peakCounts:142.7	212	+	138010165	ENST00000183605.10	ENSG00000066405.13	alternative	CLDN18
0.279314	4.62304	7.41896	0.00645402	0.260502	rDPI_7137	chr10	100987470	100987480	chr10:100987470..100987480,chr10:100987443..100987532,-;peak:chr10:100987470..100987471,-;peakCounts:3785.4	13078	-	100987470	ENST00000370234.4	ENSG00000055950.16	promoter	MRPL43
0.311001	1.45409	7.41812	0.00645703	0.260502	rDPI_33088	chr20	25195996	25196018	chr20:25195996..25196018,chr20:25195917..25196035,+;peak:chr20:25196001..25196002,+;peakCounts:335.7	643	+	25196001	ENST00000425813.5	ENSG00000197586.13	alternative	ENTPD6
0.286549	1.88712	7.4176	0.00645888	0.260502	rDPI_27033	chr19	49851008	49851027	chr19:49851008..49851027,chr19:49850950..49851046,+;peak:chr19:49851022..49851023,+;peakCounts:457.2	1536	+	49851022	ENST00000598325.5	ENSG00000104960.15	alternative	PTOV1
0.556803	1.01494	7.41512	0.0064678	0.2607	rDPI_43623	chr5	174336258	174336268	chr5:174336258..174336268,chr5:174336228..174336350,+;peak:chr5:174336262..174336263,+;peakCounts:136.8	249	+	174336262	ENST00000515513.5	ENSG00000249306.6	promoter	LINC01411
0.427438	2.22243	7.41135	0.00648138	0.261086	rDPI_50921	chr8	143334871	143334883	chr8:143334871..143334883,chr8:143334759..143334914,-;peak:chr8:143334880..143334881,-;peakCounts:740.7	1665	-	143334880	ENST00000329245.9	ENSG00000184428.13	promoter	TOP1MT
0.337383	1.52071	7.4091	0.00648949	0.261097	rDPI_26741	chr19	46661062	46661071	chr19:46661062..46661071,chr19:46661031..46661195,-;peak:chr19:46661068..46661069,-;peakCounts:176.3	606	-	46661068	ENST00000410105.2	ENSG00000197380.11	alternative	DACT3
-0.565056	2.72156	7.40906	0.00648964	0.261097	rDPI_1496	chr1	42682487	42682490	chr1:42682487..42682490,chr1:42682339..42682588,+;peak:chr1:42682489..42682490,+;peakCounts:1143.8	2901	+	42682489	ENST00000332220.10	ENSG00000065978.19	alternative	YBX1
0.443576	4.28374	7.40439	0.0065065	0.261513	rDPI_24576	chr19	3029272	3029286	chr19:3029272..3029286,chr19:3029171..3029341,-;peak:chr19:3029277..3029278,-;peakCounts:4256.1	10144	-	3029277	ENST00000262953.11	ENSG00000065717.15	promoter	TLE2
-0.560489	1.18687	7.40398	0.00650798	0.261513	rDPI_45869	chr6	118558943	118558954	chr6:118558943..118558954,chr6:118558819..118559283,+;peak:chr6:118558948..118558949,+;peakCounts:81.9	415	+	118558948	ENST00000659521.1	ENSG00000286339.1	alternative	NA
-0.552196	1.51524	7.39968	0.00652357	0.261799	rDPI_42439	chr5	103029200	103029225	chr5:103029200..103029225,chr5:103028883..103029301,+;peak:chr5:103029219..103029220,+;peakCounts:62	731	+	103029219	ENST00000513279.1	ENSG00000175749.11	alternative	EIF3KP1
0.329811	1.16797	7.39879	0.00652677	0.261799	rDPI_47318	chr7	44104646	44104659	chr7:44104646..44104659,chr7:44104524..44104799,+;peak:chr7:44104651..44104652,+;peakCounts:168.1	339	+	44104651	ENST00000455443.5	ENSG00000106624.11	alternative	AEBP1
0.30422	3.53131	7.39869	0.00652714	0.261799	rDPI_9314	chr11	65014202	65014207	chr11:65014202..65014207,chr11:65014090..65014262,+;peak:chr11:65014204..65014205,+;peakCounts:3923.4	6190	+	65014204	ENST00000533729.1	ENSG00000213465.8	alternative	ARL2
0.472613	0.908838	7.39521	0.00653977	0.261961	rDPI_39289	chr4	13832911	13832912	chr4:13832911..13832912,+	105	+	13832911	ENST00000503532.1	ENSG00000250634.6	alternative	LINC01182
0.438883	3.25423	7.39453	0.00654226	0.261961	rDPI_6492	chr10	73744263	73744268	chr10:73744263..73744268,chr10:73744252..73744332,-;peak:chr10:73744266..73744267,-;peakCounts:1320.3	4032	-	73744266	ENST00000625041.1	ENSG00000279088.1	promoter	NA
-0.325736	1.512	7.39373	0.00654516	0.261961	rDPI_42492	chr5	111512474	111512485	chr5:111512474..111512485,chr5:111512432..111512611,-;peak:chr5:111512479..111512480,-;peakCounts:238.7	578	-	111512479	ENST00000510346.5	ENSG00000164211.13	alternative	STARD4
-0.6333	2.14634	7.39317	0.00654721	0.261961	rDPI_22225	chr17	47221799	47221809	chr17:47221799..47221809,chr17:47221672..47221853,+;peak:chr17:47221802..47221803,+;peakCounts:388	1578	+	47221802	ENST00000570671.1	ENSG00000198336.9	alternative	MYL4
0.303132	3.5288	7.38717	0.00656909	0.262675	rDPI_55052	chrX	154379356	154379365	chrX:154379356..154379365,chrX:154379166..154379521,+;peak:chrX:154379359..154379360,+;peakCounts:1715.8	5662	+	154379359	ENST00000428228.5	ENSG00000102119.11	alternative	EMD
-0.707212	3.94263	7.38467	0.00657822	0.262879	rDPI_1128	chr1	31367435	31367446	chr1:31367435..31367446,chr1:31367398..31367499,-;peak:chr1:31367440..31367441,-;peakCounts:1603.7	5018	-	31367440	ENST00000497275.5	ENSG00000121769.8	alternative	FABP3
-0.454136	4.90221	7.3813	0.00659054	0.26321	rDPI_26845	chr19	48325357	48325366	chr19:48325357..48325366,chr19:48325268..48325611,+;peak:chr19:48325358..48325359,+;peakCounts:12630.6	22297	+	48325358	ENST00000596315.5	ENSG00000142227.11	promoter	EMP3
0.401617	3.20951	7.37681	0.00660704	0.263648	rDPI_13109	chr12	110614121	110614138	chr12:110614121..110614138,chr12:110614020..110614204,+;peak:chr12:110614132..110614133,+;peakCounts:1986.3	6100	+	110614132	ENST00000546643.1	ENSG00000204852.17	alternative	TCTN1
0.364995	1.54946	7.37605	0.00660981	0.263648	rDPI_3955	chr1	175193026	175193036	chr1:175193026..175193036,chr1:175192872..175193170,-;peak:chr1:175193030..175193031,-;peakCounts:187.6	707	-	175193030	ENST00000563563.2	ENSG00000235750.10	alternative	KIAA0040
0.331581	1.34837	7.37502	0.0066136	0.263648	rDPI_3190	chr1	153627214	153627220	chr1:153627214..153627220,chr1:153627160..153627321,-;peak:chr1:153627214..153627215,-;peakCounts:241.9	567	-	153627214	ENST00000392623.5	ENSG00000189171.14	alternative	S100A13
0.42379	7.06824	7.37359	0.00661888	0.263697	rDPI_37685	chr3	119677398	119677416	chr3:119677398..119677416,chr3:119677229..119677547,-;peak:chr3:119677406..119677407,-;peakCounts:39665.7	74582	-	119677406	ENST00000261070.7	ENSG00000138495.7	alternative	COX17
-0.491817	2.03327	7.37052	0.00663019	0.263975	rDPI_28057	chr2	29015872	29015875	chr2:29015872..29015875,chr2:29015799..29015914,-;peak:chr2:29015873..29015874,-;peakCounts:1046.7	1244	-	29015873	ENST00000363413.1	ENSG00000200283.1	enhancer	NA
0.47211	4.96499	7.36881	0.00663648	0.263975	rDPI_37103	chr3	53891822	53891829	chr3:53891822..53891829,chr3:53891773..53892040,-;peak:chr3:53891825..53891826,-;peakCounts:8790.8	18601	-	53891825	ENST00000487571.1	ENSG00000113811.11	alternative	SELENOK
-0.285338	4.0534	7.36745	0.00664152	0.263975	rDPI_38399	chr3	158802082	158802100	chr3:158802082..158802100,chr3:158802029..158802219,+;peak:chr3:158802087..158802088,+;peakCounts:2791.1	9167	+	158802087	ENST00000264266.12	ENSG00000118855.21	promoter	MFSD1
-0.391527	0.934442	7.36731	0.00664203	0.263975	rDPI_40585	chr4	138252226	138252232	chr4:138252226..138252232,chr4:138252183..138252247,-;peak:chr4:138252231..138252232,-;peakCounts:78.3	89	-	138252231	ENST00000280612.9	ENSG00000151012.13	enhancer	SLC7A11
[truncated: 63,655 more rows]

## Sheet: healthy male vs. female ventric
logFC	logCPM	LR	PValue	FDR	cluster_id2	cluster_chr	cluster_start	cluster_end	cluster_id1	cluster_tagcount	cluster_strand	TSS_or_center	transcriptId	geneId	cons_clust_class	geneName
[truncated: 65,298 more rows]

[truncated: 2 more sheets: failing male vs. female atria, failing male vs. female ventric]
